# Supplementary material
Source: PubMed Central journal article supplement (PMC1310564)
Supplement: plntphys_pp.105.067314_1.pdf [file plntphys_pp.105.067314_1.pdf]

|             |           |                                                                                    |      |      |      |      |      |      |      |      |          |          |      |      |      |      |      |      |      |      |      |          |          |          |          |          |          |
|-------------|-----------|------------------------------------------------------------------------------------|------|------|------|------|------|------|------|------|----------|----------|------|------|------|------|------|------|------|------|------|----------|----------|----------|----------|----------|----------|
| 267603_at   | A12g32900 | unknown protein : supported by cDNA: centromere/kinetochore protein, putative      | 167  | 233  | 281  | 263  | 277  | 216  | 227  | 252  | 0.0      | 0.549577 | 133  | 148  | 168  | 202  | 139  | 131  | 180  | 167  | 150  | 164      | 0.92     | 0.492834 | 157      | 0.95     | 0.780921 |
| 267604_at   | A12g32930 | hyothetical protein predicted by gene: zinc finger (CCHC-type) family protein      | 118  | 135  | 158  | 141  | 140  | 116  | 137  | 132  | 1.04     | 0.749620 | 59   | 62   | 78   | 67   | 56   | 46   | 71   | 59   | 67   | 60       | 1.11     | 0.400484 | 56       | 1.18     | 0.287021 |
| 267605_at   | A12g32920 | outative octan disulfide isomerase : s thioredoxin family protein                  | 656  | 718  | 806  | 866  | 908  | 753  | 727  | 842  | 0.86     | 0.143021 | 717  | 677  | 749  | 962  | 770  | 746  | 644  | 623  | 715  | 749      | 0.95     | 0.688956 | 826      | 0.86     | 0.193387 |
| 267606_at   | A12g32910 | putative beta-ketolacyl-CoA synthase : beta-ketolacyl-CoA synthase, putative       | 156  | 190  | 210  | 240  | 245  | 186  | 190  | 223  | 0.84     | 0.271456 | 142  | 133  | 157  | 145  | 205  | 190  | 170  | 213  | 196  | 205      | 1.07     | 0.011515 | 195      | 0.72     | 0.65937  |
| 267607_s_at | A12g26740 | exoxidase (ATaseH) identical to exoxidase hydrolase, soluble (sEH)                 | 90   | 171  | 153  | 173  | 150  | 88   | 138  | 137  | 1.01     | 0.977676 | 184  | 244  | 188  | 103  | 83   | 89   | 84   | 75   | 205  | 87       | 2.37     | 0.002042 | 91       | 2.24     | 0.004784 |
| 267608_at   | A12g26770 | hyothetical protein predicted by gene: plectin-related                             | 301  | 416  | 396  | 507  | 552  | 428  | 371  | 495  | 0.75     | 0.069225 | 364  | 309  | 365  | 607  | 486  | 391  | 417  | 388  | 346  | 458      | 0.76     | 0.095202 | 495      | 0.70     | 0.083694 |
| 267609_at   | A12g26780 | unknown protein similar to GP5221278-expressed protein                             | 301  | 253  | 229  | 244  | 264  | 179  | 225  | 229  | 0.98     | 0.890966 | 179  | 157  | 178  | 215  | 178  | 153  | 197  | 195  | 171  | 187      | 0.92     | 0.322667 | 182      | 0.94     | 0.620220 |
| 267610_at   | A12g26790 | unknown protein similar to GP5221278-expressed protein                             | 36   | 49   | 53   | 52   | 45   | 40   | 38   | 50   | 0.88     | 0.048017 | 30   | 35   | 36   | 36   | 36   | 36   | 36   | 36   | 36   | 36       | 0.85     | 0.011315 | 36       | 0.84     | 0.646374 |
| 267611_at   | A12g26660 | unknown protein : supported by cDNA: SPX (SYG1/Pho81/XPR1) domain-cont             | 192  | 268  | 283  | 277  | 322  | 255  | 248  | 285  | 0.87     | 0.344650 | 267  | 276  | 283  | 375  | 299  | 206  | 275  | 285  | 275  | 304      | 0.91     | 0.281302 | 321      | 0.86     | 0.178438 |
| 267612_at   | A12g26690 | putative nitrate transporter : nitrate transporter (NTP2)                          | 38   | 61   | 66   | 52   | 55   | 37   | 55   | 48   | 1.14     | 0.536934 | 24   | 27   | 23   | 39   | 29   | 30   | 31   | 33   | 25   | 33       | 0.76     | 0.021103 | 33       | 0.75     | 0.076876 |
| 267613_at   | A12g26700 | outative second messenger-dependent protein kinase family protein                  | 156  | 169  | 140  | 187  | 221  | 165  | 138  | 191  | 0.72     | 0.062326 | 116  | 114  | 129  | 202  | 172  | 149  | 174  | 171  | 120  | 176      | 0.68     | 0.001495 | 178      | 0.67     | 0.013223 |
| 267614_at   | A12g26710 | putative cytochrome P450                                                           | 151  | 166  | 190  | 140  | 150  | 117  | 169  | 136  | 1.24     | 0.089764 | 167  | 179  | 159  | 166  | 144  | 168  | 168  | 168  | 168  | 158      | 1.07     | 0.225021 | 153      | 1.10     | 0.155053 |
| 267615_at   | A12g26720 | putative phytochrome                                                               | 15   | 13   | 17   | 15   | 23   | 15   | 18   | 0.86 | 0.017800 | 9        | 13   | 15   | 14   | 9    | 14   | 16   | 16   | 13   | 14   | 0.93     | 0.875249 | 12       | 1.05     | 0.818710 |          |
| 267616_at   | A12g26680 | unknown protein : supported by full-len expressed protein                          | 181  | 203  | 218  | 277  | 256  | 242  | 201  | 258  | 0.78     | 0.017504 | 188  | 202  | 230  | 311  | 241  | 215  | 271  | 233  | 207  | 254      | 0.81     | 0.097243 | 256      | 0.81     | 0.191706 |
| 267617_at   | A12g26670 | heme oxygenase 1 (HO1) identical to C heme oxygenase 1 (HO1) (HY1)                 | 117  | 181  | 201  | 176  | 189  | 152  | 166  | 172  | 0.97     | 0.833006 | 164  | 223  | 185  | 272  | 242  | 214  | 259  | 263  | 191  | 250      | 0.76     | 0.018082 | 243      | 0.78     | 0.094222 |
| 267618_at   | A12g26760 | putative cydin : supported by cDNA: alpha cyclin, putative                         | 290  | 374  | 339  | 430  | 482  | 375  | 334  | 429  | 0.78     | 0.074226 | 319  | 267  | 323  | 404  | 353  | 311  | 323  | 312  | 303  | 341      | 0.89     | 0.012348 | 356      | 0.85     | 0.179763 |
| 267619_at   | A12g26730 | outative receptor-like protein kinase : s leucine-rich repeat transmembrane prot   | 376  | 425  | 410  | 517  | 613  | 448  | 404  | 526  | 0.77     | 0.070940 | 245  | 210  | 277  | 359  | 310  | 247  | 280  | 267  | 244  | 293      | 0.83     | 0.146880 | 305      | 0.80     | 0.178089 |
| 267620_at   | A12g39640 | putative beta-1,3-glucanase : glycyl hydrolase family 17 protein                   | 78   | 81   | 102  | 42   | 45   | 44   | 87   | 44   | 1.99     | 0.004591 | 34   | 34   | 42   | 28   | 30   | 26   | 32   | 32   | 37   | 30       | 1.23     | 0.040067 | 28       | 1.29     | 0.057487 |
| 267621_at   | A12g39680 | unknown protein                                                                    | 36   | 45   | 30   | 35   | 27   | 32   | 37   | 31   | 1.19     | 0.297510 | 49   | 62   | 52   | 69   | 57   | 62   | 54   | 46   | 54   | 58       | 0.94     | 0.559971 | 63       | 0.86     | 0.176099 |
| 267622_at   | A12g39690 | hyothetical protein predicted by gene: expressed protein                           | 18   | 20   | 29   | 23   | 23   | 25   | 22   | 24   | 0.94     | 0.688517 | 19   | 23   | 17   | 18   | 17   | 20   | 19   | 16   | 20   | 18       | 1.11     | 0.272417 | 19       | 1.08     | 0.505753 |
| 267623_at   | A12g39650 | unknown protein                                                                    | 232  | 212  | 277  | 486  | 519  | 321  | 240  | 442  | 0.54     | 0.034528 | 110  | 125  | 102  | 126  | 123  | 123  | 134  | 132  | 112  | 128      | 0.88     | 0.040040 | 124      | 0.91     | 0.164952 |
| 267624_at   | A12g39660 | putative protein kinase : protein kinase, putative                                 | 69   | 82   | 91   | 86   | 95   | 78   | 81   | 86   | 0.94     | 0.522234 | 53   | 55   | 53   | 72   | 63   | 62   | 74   | 60   | 53   | 66       | 0.80     | 0.013455 | 66       | 0.81     | 0.018348 |
| 267625_at   | A12g39700 | outative exoamin : ssupported by full-len expressed protein (EXP4)                 | 200  | 268  | 311  | 343  | 371  | 293  | 260  | 335  | 0.77     | 0.525855 | 149  | 155  | 167  | 244  | 190  | 188  | 168  | 149  | 157  | 188      | 0.84     | 0.206629 | 207      | 0.76     | 0.058455 |
| 267626_at   | A12g39705 | Exoressed protein : supported by full-len expressed protein                        | 188  | 252  | 210  | 309  | 328  | 252  | 217  | 296  | 0.73     | 0.054127 | 451  | 480  | 482  | 625  | 490  | 417  | 497  | 463  | 471  | 498      | 0.94     | 0.578611 | 511      | 0.92     | 0.555217 |
| 267627_at   | A12g39710 | unknown protein similar to GP 2245012: aspartyl protease family protein            | 67   | 92   | 133  | 334  | 135  | 136  | 98   | 135  | 0.72     | 0.120162 | 71   | 74   | 73   | 114  | 82   | 81   | 115  | 103  | 73   | 99       | 0.74     | 0.040068 | 92       | 0.79     | 0.147754 |
| 267628_at   | A12g39670 | unknown protein similar to hyothetical radical SAM domain-containing protein       | 161  | 260  | 196  | 235  | 295  | 193  | 206  | 241  | 0.85     | 0.446655 | 214  | 188  | 200  | 292  | 245  | 241  | 201  | 254  | 0.79 | 0.006334 | 262      | 0.77     | 0.022656 |          |          |
| 267629_at   | A12g39730 | putative protein kinase contains a prote serine/threonine protein kinase, putative | 12   | 14   | 18   | 17   | 17   | 18   | 15   | 18   | 0.83     | 0.190822 | 12   | 12   | 10   | 15   | 10   | 12   | 11   | 11   | 11   | 12       | 0.92     | 0.435949 | 12       | 0.89     | 0.405045 |
| 267630_at   | A12g39740 | outative protein kinase contains a prote serine/threonine protein kinase, putative | 144  | 187  | 206  | 189  | 203  | 186  | 179  | 193  | 0.93     | 0.506962 | 168  | 184  | 191  | 224  | 159  | 155  | 186  | 178  | 181  | 181      | 1.00     | 0.989897 | 180      | 1.01     | 0.967380 |
| 267631_at   | A12g39750 | putative cytochrome P450                                                           | 11   | 10   | 12   | 11   | 12   | 12   | 11   | 11   | 0.97     | 0.650711 | 12   | 14   | 9    | 11   | 11   | 8    | 8    | 8    | 12   | 9        | 1.26     | 0.139242 | 10       | 1.16     | 0.400076 |
| 267632_at   | A12g39760 | unknown protein hyothetical protein                                                | 20   | 24   | 20   | 24   | 24   | 24   | 24   | 24   | 0.90     | 0.157803 | 19   | 15   | 21   | 26   | 17   | 17   | 17   | 17   | 17   | 26       | 0.95     | 0.817469 | 26       | 0.91     | 0.646787 |
| 267633_at   | A12g39770 | putative cytochrome P450                                                           | 17   | 18   | 27   | 23   | 29   | 57   | 21   | 36   | 0.58     | 0.227516 | 13   | 14   | 18   | 21   | 15   | 17   | 14   | 18   | 15   | 17       | 0.89     | 0.376672 | 18       | 0.86     | 0.331928 |
| 267634_at   | A12g39780 | hyothetical protein predicted by gene: pentatricopeptide (PPR) repeat-containin    | 55   | 88   | 83   | 103  | 106  | 80   | 76   | 97   | 0.78     | 0.173900 | 48   | 41   | 55   | 66   | 51   | 52   | 55   | 54   | 48   | 56       | 0.86     | 0.133197 | 57       | 0.85     | 0.229188 |
| 267635_at   | A12g39790 | putative photosystem II oxygen-evolving photosystem II oxygen-evolving compo       | 35   | 46   | 48   | 55   | 56   | 46   | 43   | 52   | 0.82     | 0.159524 | 44   | 45   | 45   | 51   | 35   | 47   | 48   | 42   | 44   | 45       | 0.99     | 0.943268 | 45       | 1.00     | 0.977951 |
| 267636_at   | A12g39800 | outative RNA helicase A identical to G1/CEH1-like RNA/DNA helicase, putative       | 154  | 215  | 201  | 293  | 168  | 193  | 209  | 0.82 | 0.600611 | 149      | 27   | 135  | 186  | 149  | 132  | 152  | 157  | 142  | 157  | 180      | 0.83     | 0.138754 | 156      | 0.83     | 0.273196 |
| 267637_at   | A12g39650 | 3-hydroxyisobutyl-vl-coenzyme A hydro 3-hydroxyisobutyl-vl-coenzyme A hydro        | 14   | 27   | 27   | 29   | 25   | 28   | 22   | 27   | 0.82     | 0.328823 | 13   | 21   | 16   | 21   | 15   | 17   | 16   | 14   | 16   | 17       | 0.99     | 0.929731 | 18       | 0.93     | 0.714426 |
| 267638_at   | A12g39660 | 3-hydroxyisobutyl-vl-coenzyme A hydro 3-hydroxyisobutyl-vl-coenzyme A hydro        | 35   | 37   | 46   | 31   | 46   | 47   | 39   | 41   | 0.96     | 0.739695 | 41   | 51   | 47   | 47   | 37   | 37   | 41   | 36   | 46   | 40       | 1.16     | 0.120678 | 40       | 1.14     | 0.286927 |
| 267639_at   | A12g39670 | putative tropinone reductase : tropinone reductase, putative / tropine d           | 23   | 22   | 27   | 26   | 27   | 23   | 24   | 25   | 0.94     | 0.496486 | 22   | 20   | 26   | 17   | 20   | 17   | 21   | 22   | 23   | 19       | 1.17     | 0.114540 | 18       | 1.25     | 0.085055 |
| 267640_at   | A12g39680 | hyothetical protein predicted by gene: expressed protein                           | 25   | 33   | 36   | 33   | 33   | 23   | 33   | 33   | 0.87     | 0.240326 | 23   | 25   | 24   | 26   | 21   | 20   | 24   | 22   | 23   | 21       | 1.05     | 0.079493 | 22       | 1.07     | 0.401697 |
| 267641_at   | A12g39690 | unknown protein predicted by gene: expressed protein                               | 19   | 22   | 26   | 24   | 23   | 21   | 23   | 23   | 1.00     | 0.995650 | 23   | 22   | 23   | 22   | 20   | 20   | 19   | 26   | 23   | 21       | 1.06     | 0.518465 | 21       | 1.10     | 0.058620 |
| 267642_at   | A12g39640 | putative Mutator-like transposase : Mutator-like transposase family                | 68   | 71   | 77   | 87   | 99   | 78   | 72   | 88   | 0.82     | 0.066900 | 55   | 47   | 60   | 70   | 56   | 52   | 67   | 65   | 54   | 62       | 0.87     | 0.196314 | 59       | 0.91     | 0.488132 |
| 267643_at   | A12g39710 | unknown protein : supported by cDNA: RabGAP/TBC domain-containin protein           | 198  | 277  | 272  | 321  | 360  | 301  | 249  | 327  | 0.76     | 0.063603 | 243  | 217  | 260  | 356  | 299  | 275  | 271  | 258  | 240  | 292      | 0.82     | 0.082813 | 310      | 0.77     | 0.061238 |
| 267644_at   | A12g39695 | Exoressed protein : supported by cDNA: expressed protein                           | 89   | 125  | 130  | 133  | 140  | 116  | 115  | 130  | 0.89     | 0.374320 | 85   | 114  | 114  | 167  | 117  | 131  | 130  | 123  | 104  | 134      | 0.78     | 0.075474 | 138      | 0.75     | 0.129444 |
| 267645_at   | A12g40000 | metallothionein-like protein                                                       | 26   | 26   | 26   | 26   | 26   | 26   | 26   | 26   | 0.37     | 0.326862 | 24   | 25   | 26   | 28   | 27   | 28   | 27   | 28   | 27   | 28       | 0.94     | 0.247071 | 26       | 0.97     | 0.663710 |
| 267646_at   | A12g41990 | unknown protein : expressed protein                                                | 1124 | 1141 | 1234 | 1233 | 1471 | 1156 | 1166 | 1287 | 0.91     | 0.297509 | 1112 | 1194 | 1155 | 1366 | 1264 | 1151 | 1260 | 1200 | 1153 | 1282     | 0.90     | 0.205592 | 137      | 0.88     | 0.234336 |
| 267647_at   | A12g41980 | putative RING zinc finger protein : seven in absentia (SINA) family protein        | 144  | 179  | 180  | 187  | 211  | 176  | 168  | 191  | 0.88     | 0.215433 | 132  | 120  | 152  | 181  | 161  | 147  | 157  | 159  | 135  | 161      | 0.84     | 0.037775 | 163      | 0.82     | 0.100274 |
| 267648_at   | A12g41970 | outative protein kinase contains a prote protein kinase, putative                  | 33   | 35   | 42   | 37   | 38   | 37   | 36   | 37   | 0.97     | 0.733943 | 29   | 37   | 38   | 30   | 27   | 28   | 45   | 37   | 35   | 34       | 1.03     | 0.827933 | 28       | 1.22     | 0.097642 |
| 267649_at   | A12g41960 | hyothetical protein predicted by gene: expressed protein                           | 221  | 213  | 220  | 313  | 313  | 220  | 280  | 280  | 0.82     | 0.070011 | 282  | 280  | 282  | 304  | 281  | 278  | 282  | 281  | 278  | 281      | 0.78     | 0.062649 | 272      | 0.81     | 0.212109 |
| 267650_at   | A12g41930 | outative protein kinase contains a prote protein kinase family protein             | 46   | 52   | 62   | 59   | 62   | 67   | 54   | 63   | 0.86     | 0.165867 | 43   | 44   | 51   | 50   | 38   | 44   | 48   | 49   | 46   | 46       | 1.00     | 0.994173 |          |          |          |

|             |           |                                           |                                                    |      |      |      |      |      |      |      |      |          |          |      |      |      |      |      |      |      |      |      |      |          |          |          |          |          |          |
|-------------|-----------|-------------------------------------------|----------------------------------------------------|------|------|------|------|------|------|------|------|----------|----------|------|------|------|------|------|------|------|------|------|------|----------|----------|----------|----------|----------|----------|
| 267508_at   | A12g45700 | hypothetical protein predicted by gene    | stic alpha motif (SAM) domain-contain              | 235  | 265  | 309  | 353  | 346  | 290  | 270  | 330  | 0.82     | 0.112287 | 256  | 251  | 283  | 416  | 315  | 259  | 333  | 316  | 263  | 328  | 0.80     | 0.112180 | 330      | 0.80     | 0.229616 |          |
| 267509_at   | A12g45660 | MADS-box protein (AGL20) ; supporte       | MADS-box protein (AGL20)                           | 69   | 70   | 85   | 47   | 72   | 53   | 75   | 57   | 1.30     | 0.131204 | 24   | 23   | 23   | 30   | 24   | 22   | 33   | 28   | 23   | 28   | 0.85     | 0.167654 | 25       | 0.92     | 0.421780 |          |
| 267510_at   | A12g45640 | unknown protein ; supported by full-l     | er shi associated covaldehyde o18 fami             | 685  | 994  | 977  | 1013 | 1038 | 910  | 885  | 987  | 0.90     | 0.398436 | 672  | 818  | 805  | 1078 | 781  | 772  | 892  | 915  | 765  | 888  | 0.86     | 0.183304 | 877      | 0.87     | 0.368908 |          |
| 267511_at   | A12g45670 | unknown protein ; supported by full-l     | er shi associated covaldehyde o18 fami             | 761  | 115  | 123  | 143  | 148  | 104  | 103  | 128  | 0.85     | 0.215071 | 123  | 104  | 82   | 70   | 70   | 91   | 84   | 127  | 94   | 116  | 0.87     | 0.165701 | 82       | 0.94     | 0.345706 |          |
| 267512_at   | A12g45690 | hypothetical protein predicted by gene    | suc shrunk seed protein (SSE1)                     | 112  | 155  | 158  | 176  | 178  | 142  | 142  | 165  | 0.86     | 0.297797 | 113  | 86   | 129  | 126  | 186  | 141  | 130  | 146  | 136  | 122  | 0.84     | 0.83     | 0.116091 | 153      | 0.80     | 0.170259 |
| 267513_at   | A12g45620 | unknown protein ; supported by cDNA:      | nauxideoxytransferase family protein               | 299  | 432  | 471  | 417  | 494  | 344  | 400  | 418  | 0.96     | 0.804213 | 360  | 320  | 320  | 424  | 369  | 337  | 421  | 383  | 333  | 387  | 0.86     | 0.066366 | 377      | 0.89     | 0.204921 |          |
| 267514_at   | A12g45630 | putative glyceraldehyde dehydrogenase     | ; sucoi nucleotidease family protein               | 52   | 69   | 83   | 85   | 90   | 54   | 68   | 76   | 0.89     | 0.584044 | 64   | 67   | 65   | 70   | 62   | 67   | 93   | 84   | 65   | 75   | 0.87     | 0.245038 | 68       | 0.98     | 0.679512 |          |
| 267515_at   | A12g45680 | putative PCF2-like DNA binding protein    | ; TCF family transcription factor, putative        | 143  | 170  | 141  | 170  | 211  | 143  | 161  | 143  | 0.87     | 0.215416 | 126  | 154  | 126  | 143  | 159  | 143  | 162  | 146  | 153  | 168  | 0.86     | 0.150311 | 168      | 0.88     | 0.304456 |          |
| 267516_at   | A12g30520 | unknown protein                           | ; signal transducer of phototrophic resons         | 21   | 26   | 27   | 28   | 26   | 24   | 25   | 26   | 0.94     | 0.513827 | 17   | 29   | 26   | 20   | 18   | 18   | 21   | 19   | 24   | 19   | 1.24     | 0.186153 | 18       | 1.29     | 0.240228 |          |
| 267517_at   | A12g30510 | unknown protein                           | ; signal transducer of phototrophic resons         | 75   | 147  | 81   | 100  | 89   | 42   | 101  | 77   | 1.31     | 0.463587 | 23   | 44   | 27   | 80   | 51   | 49   | 58   | 44   | 31   | 56   | 0.55     | 0.041007 | 60       | 0.52     | 0.076310 |          |
| 267518_at   | A12g30500 | unknown protein                           | ; kinase interacting family protein                | 474  | 522  | 662  | 679  | 779  | 551  | 552  | 670  | 0.82     | 0.247851 | 429  | 409  | 399  | 497  | 455  | 436  | 530  | 510  | 413  | 486  | 0.85     | 0.022788 | 463      | 0.89     | 0.066103 |          |
| 267519_at   | A12g30470 | putative VIP/ABH1 family regulatory co    | transcriptional factor B3 family protein           | 113  | 156  | 156  | 143  | 165  | 136  | 141  | 148  | 0.96     | 0.712577 | 127  | 113  | 121  | 135  | 116  | 103  | 108  | 114  | 121  | 115  | 1.05     | 0.491538 | 118      | 1.02     | 0.726884 |          |
| 267520_at   | A12g30460 | putative integral membrane protein        | ; expressed protein                                | 138  | 186  | 165  | 195  | 228  | 184  | 163  | 196  | 0.83     | 0.230688 | 144  | 159  | 157  | 207  | 188  | 175  | 166  | 154  | 179  | 186  | 0.86     | 0.089898 | 190      | 0.81     | 0.025025 |          |
| 267521_at   | A12g30480 | hypothetical protein predicted by gene    | fin expressed protein                              | 12   | 17   | 19   | 17   | 22   | 19   | 16   | 19   | 0.82     | 0.223648 | 10   | 10   | 15   | 12   | 10   | 10   | 14   | 13   | 11   | 12   | 0.96     | 0.773817 | 11       | 1.05     | 0.762340 |          |
| 267522_at   | A12g30430 | hypothetical protein predicted by gene    | suc hypothetical protein                           | 15   | 15   | 24   | 21   | 21   | 19   | 18   | 20   | 0.89     | 0.525941 | 13   | 11   | 15   | 17   | 15   | 14   | 15   | 15   | 13   | 15   | 0.86     | 0.115723 | 15       | 0.86     | 0.240291 |          |
| 267523_at   | A12g30610 | unknown protein                           | ; BTB/POZ domain-containing protein                | 278  | 486  | 462  | 241  | 367  | 202  | 409  | 270  | 1.51     | 0.167361 | 191  | 207  | 142  | 213  | 230  | 193  | 306  | 290  | 180  | 246  | 0.73     | 0.088464 | 212      | 0.85     | 0.225591 |          |
| 267524_at   | A12g30600 | unknown protein                           | ; BTB/POZ domain-containing protein                | 219  | 360  | 343  | 216  | 322  | 162  | 307  | 234  | 1.32     | 0.311741 | 108  | 113  | 101  | 106  | 121  | 111  | 140  | 133  | 107  | 122  | 0.88     | 0.154385 | 112      | 0.95     | 0.425316 |          |
| 267525_at   | A12g30560 | putative glycine-rich protein             | ; glycine-rich protein                             | 46   | 49   | 60   | 58   | 80   | 63   | 52   | 67   | 0.77     | 0.125940 | 34   | 30   | 32   | 35   | 34   | 31   | 49   | 41   | 32   | 38   | 0.84     | 0.198450 | 34       | 0.95     | 0.343086 |          |
| 267526_at   | A12g30570 | photosystem II reaction center 6.1KD      | p photosystem II reaction center W (PsbW           | 1243 | 1871 | 1799 | 1817 | 1934 | 1519 | 1638 | 1757 | 0.93     | 0.637937 | 1522 | 1849 | 1762 | 2327 | 1950 | 1798 | 2216 | 2105 | 1711 | 2079 | 0.82     | 0.043295 | 2025     | 0.85     | 0.165071 |          |
| 267527_at   | A12g30620 | histone H1 ; supported by full-length d   | histone H1 2                                       | 887  | 1272 | 1304 | 1291 | 1320 | 1158 | 1188 | 1256 | 0.95     | 0.578628 | 1181 | 1156 | 1153 | 1370 | 1146 | 1237 | 1260 | 1242 | 1163 | 1251 | 0.93     | 0.117771 | 1251     | 0.93     | 0.251407 |          |
| 267493_at   | A12g30400 | unknown protein                           | ; ovate family protein                             | 22   | 29   | 35   | 31   | 34   | 36   | 29   | 33   | 1.05     | 0.290578 | 22   | 28   | 30   | 24   | 22   | 29   | 34   | 26   | 27   | 27   | 1.00     | 0.994568 | 25       | 1.08     | 0.535569 |          |
| 267494_at   | A12g30410 | TCP1-chaperonin cofactor A isoform        | ; su tubulin folding cofactor A (KIESEL            | 636  | 701  | 680  | 838  | 904  | 737  | 672  | 826  | 0.81     | 0.041447 | 750  | 792  | 836  | 1160 | 1012 | 863  | 855  | 889  | 793  | 956  | 0.83     | 0.082171 | 1012     | 0.78     | 0.070295 |          |
| 267495_at   | A12g30420 | myb-like protein                          | ; myb family transcription factor                  | 15   | 17   | 20   | 20   | 17   | 16   | 17   | 18   | 0.98     | 0.871868 | 13   | 16   | 18   | 15   | 15   | 14   | 20   | 15   | 16   | 16   | 0.98     | 0.886367 | 15       | 1.06     | 0.619724 |          |
| 267496_at   | A12g30550 | putative lipase ; supported by full-len   | oil lipase class 3 family protein                  | 79   | 99   | 135  | 103  | 120  | 97   | 104  | 107  | 0.88     | 0.890378 | 73   | 74   | 78   | 108  | 79   | 83   | 103  | 94   | 75   | 93   | 0.80     | 0.048673 | 90       | 0.83     | 0.174466 |          |
| 267497_at   | A12g30540 | putative glutaredoxin predicted by fu     | l glutaredoxin family protein                      | 25   | 33   | 33   | 90   | 72   | 81   | 30   | 81   | 0.38     | 0.000956 | 65   | 61   | 78   | 205  | 140  | 144  | 110  | 112  | 68   | 142  | 0.48     | 0.018405 | 163      | 0.42     | 0.011694 |          |
| 267467_at   | A12g30580 | putative C3HC4 zinc finger protein ;      | ; su zinc finger (C3HC4-type RING finger) fa       | 118  | 149  | 150  | 173  | 176  | 148  | 139  | 166  | 0.84     | 0.125417 | 129  | 128  | 141  | 163  | 167  | 138  | 164  | 154  | 132  | 161  | 0.82     | 0.035000 | 163      | 0.81     | 0.097232 |          |
| 267468_at   | A12g30530 | unknown protein ; supported by cDNA:      | expressed protein                                  | 108  | 150  | 162  | 165  | 170  | 135  | 140  | 156  | 0.90     | 0.455253 | 127  | 165  | 168  | 222  | 192  | 164  | 163  | 162  | 153  | 181  | 0.85     | 0.190847 | 193      | 0.80     | 0.137893 |          |
| 267469_at   | A12g30590 | unknown protein ; supported by cDNA:      | WRKY family transcription factor                   | 166  | 240  | 219  | 294  | 328  | 245  | 209  | 289  | 0.72     | 0.069971 | 214  | 214  | 226  | 328  | 277  | 245  | 253  | 261  | 218  | 273  | 0.80     | 0.033788 | 283      | 0.77     | 0.057176 |          |
| 267470_at   | A12g30490 | cinnamate-4-hydroxylase molecular me      | chanism-cinnamate 4-monooxygenase / cin            | 372  | 499  | 489  | 518  | 479  | 396  | 453  | 464  | 0.98     | 0.844682 | 407  | 351  | 422  | 588  | 457  | 360  | 430  | 418  | 303  | 453  | 0.87     | 0.323717 | 472      | 0.83     | 0.341187 |          |
| 267471_at   | A12g30200 | putative ferredoxin reductase ; suco      | ferredoxin reductase                               | 322  | 441  | 367  | 387  | 441  | 297  | 303  | 353  | 0.87     | 0.075828 | 345  | 299  | 340  | 438  | 377  | 354  | 382  | 358  | 329  | 384  | 0.87     | 0.075532 | 384      | 0.86     | 0.118708 |          |
| 267472_at   | A12g30850 | putative basic blue polyaniline (plac     | tyaniline) polystyrene-like domain-containing prot | 488  | 939  | 542  | 2265 | 1988 | 1538 | 676  | 1931 | 0.35     | 0.007313 | 1173 | 1184 | 1383 | 3412 | 2760 | 2570 | 2988 | 2903 | 1247 | 2927 | 0.43     | 0.000131 | 2914     | 0.43     | 0.003218 |          |
| 267473_at   | A12g02750 | hypothetical protein predicted by gene    | fin pentatricopeptide (PPR) repeat-containi        | 40   | 49   | 60   | 61   | 66   | 61   | 50   | 63   | 0.79     | 0.096726 | 35   | 49   | 46   | 45   | 36   | 41   | 51   | 40   | 43   | 43   | 1.01     | 0.937355 | 41       | 1.06     | 0.647072 |          |
| 267474_at   | A12g02740 | hypothetical protein predicted by gene    | suc transcription factor, putative                 | 88   | 111  | 107  | 118  | 126  | 102  | 102  | 115  | 0.88     | 0.295120 | 91   | 110  | 116  | 146  | 113  | 103  | 100  | 92   | 106  | 111  | 0.95     | 0.178046 | 120      | 0.88     | 0.381431 |          |
| 267475_at   | A12g02730 | expressed protein ; supported by full-l   | expressed protein                                  | 44   | 68   | 78   | 67   | 62   | 53   | 307  | 67   | 0.52     | 0.723086 | 53   | 66   | 60   | 81   | 67   | 60   | 59   | 60   | 59   | 60   | 0.97     | 0.01096  | 67       | 0.89     | 0.425631 |          |
| 267476_at   | A12g02720 | putative pectate lyase                    | ; pectate lyase family protein                     | 31   | 33   | 36   | 24   | 33   | 21   | 34   | 26   | 1.29     | 0.140848 | 17   | 14   | 15   | 13   | 15   | 15   | 8    | 13   | 15   | 13   | 1.18     | 0.278559 | 15       | 1.04     | 0.639919 |          |
| 267477_at   | A12g02710 | putative receptor-like protein kinase     | ; PAC motif-containing protein                     | 341  | 728  | 701  | 264  | 300  | 144  | 590  | 236  | 2.50     | 0.056628 | 306  | 376  | 188  | 241  | 209  | 289  | 374  | 338  | 290  | 290  | 1.00     | 0.994790 | 246      | 1.18     | 0.504858 |          |
| 267478_at   | A12g02700 | hypothetical protein predicted by gene    | suc DC1 domain-containing protein                  | 29   | 29   | 30   | 27   | 32   | 28   | 29   | 29   | 1.02     | 0.819764 | 33   | 21   | 28   | 25   | 28   | 27   | 22   | 23   | 27   | 25   | 1.09     | 0.507902 | 27       | 1.02     | 0.912130 |          |
| 267479_at   | A12g02690 | hypothetical protein                      | ; hypothetical protein                             | 24   | 21   | 22   | 25   | 27   | 24   | 21   | 25   | 1.04     | 0.768877 | 14   | 24   | 23   | 20   | 16   | 17   | 24   | 19   | 20   | 20   | 0.74     | 0.030332 | 18       | 1.13     | 0.323994 |          |
| 267480_at   | A12g02830 | putative retroelement pol polyprotein     | ; copla-like retrotransposon family                | 15   | 20   | 29   | 18   | 26   | 25   | 21   | 23   | 0.93     | 0.738287 | 15   | 19   | 18   | 16   | 14   | 13   | 26   | 27   | 17   | 19   | 0.91     | 0.668700 | 14       | 1.21     | 0.066738 |          |
| 267481_at   | A12g02780 | putative receptor-like protein kinase     | ; leucine-rich repeat transmembrane prot           | 398  | 415  | 430  | 554  | 537  | 414  | 414  | 501  | 0.83     | 0.125352 | 273  | 247  | 304  | 429  | 371  | 295  | 339  | 320  | 274  | 351  | 0.78     | 0.061117 | 365      | 0.75     | 0.098842 |          |
| 267482_s_at | A12g02770 | unknown protein                           | ; CYP1-interacting protein-related                 | 49   | 81   | 79   | 97   | 105  | 78   | 70   | 93   | 0.75     | 0.155610 | 44   | 56   | 56   | 80   | 60   | 56   | 65   | 61   | 52   | 65   | 0.81     | 0.095512 | 65       | 0.80     | 0.191605 |          |
| 267483_at   | A12g02810 | unknown protein ; supported by full-len   | UDP-glucalase/UDP-glucose transferase              | 460  | 532  | 664  | 627  | 551  | 525  | 614  | 0.86 | 0.144573 | 502      | 540  | 632  | 793  | 573  | 663  | 597  | 683  | 630  | 605  | 587  | 0.83     | 0.036005 | 609      | 0.82     | 0.650000 |          |
| 267484_at   | A12g02760 | E2, ubiquitin-conjugating enzyme 2 (UBC2) | ; E2, ubiquitin-conjugating enzyme 2 (UBC2)        | 193  | 1334 | 1486 | 1376 | 1755 | 1263 | 1274 | 1475 | 0.86     | 0.382234 | 1412 | 1725 | 1418 | 1918 | 1470 | 1598 | 1739 | 1766 | 1518 | 1658 | 0.92     | 0.388430 | 1598     | 0.92     | 0.709247 |          |
| 267485_at   | A12g02820 | putative MYB family transcription factor  | ; myb family transcription factor (MYB88)          | 16   | 19   | 23   | 23   | 24   | 18   | 18   | 22   | 0.83     | 0.166573 | 8    | 11   | 17   | 9    | 5    | 8    | 15   | 13   | 12   | 10   | 1.21     | 0.498822 | 7        | 1.65     | 0.158236 |          |
| 267486_at   | A12g02800 | putative non-LTR protein kinase           | ; non-LTR protein kinase (APK2b)                   | 208  | 286  | 286  | 362  | 371  | 296  | 260  | 343  | 0.76     | 0.076191 | 176  | 173  | 216  | 341  | 254  | 208  | 256  | 273  | 188  | 266  | 0.71     | 0.043030 | 267      | 0.70     | 0.128247 |          |
| 267487_at   | A12g19100 | putative non-LTR retroelement reverse     | ; non-LTR retrotransposon family (LINE)            | 27   | 33   | 34   | 31   | 38   | 33   | 31   | 34   | 0.92     | 0.441001 | 28   | 34   | 31   | 33   | 28   | 27   | 30   | 31   | 29   | 1.07 | 0.330722 | 29       | 1.07     | 0.474823 |          |          |
| 267488_at   | A12g19130 | putative cadmium-transporting ATPase      | ; E1-E2 holo family protein / halo                 | 172  | 212  | 229  |      |      |      |      |      |          |          |      |      |      |      |      |      |      |      |      |      |          |          |          |          |          |          |

|             |           |                                          |                                                            |      |      |      |      |      |      |      |      |      |          |          |      |      |      |      |      |      |      |      |      |      |          |          |      |          |          |
|-------------|-----------|------------------------------------------|------------------------------------------------------------|------|------|------|------|------|------|------|------|------|----------|----------|------|------|------|------|------|------|------|------|------|------|----------|----------|------|----------|----------|
| 267420_at   | A12g35030 | hypothetical protein predicted by graii  | peptidocropeptide (PPR) repeat-containi                    | 48   | 56   | 71   | 71   | 87   | 68   | 58   | 75   | 0.77 | 0.132849 | 44       | 43   | 42   | 68   | 53   | 45   | 51   | 49   | 43   | 53   | 0.81 | 0.102350 | 55       | 0.78 | 0.145784 |          |
| 267421_at   | A12g35040 | putative phosphoribosylaminimidazole     | ACAFR/TIMPC-Hase bienzyme family p                         | 334  | 369  | 388  | 399  | 436  | 354  | 364  | 396  | 0.92 | 0.132723 | 301      | 246  | 295  | 374  | 339  | 276  | 360  | 336  | 281  | 337  | 0.83 | 0.070823 | 330      | 0.85 | 0.217711 |          |
| 267422_at   | A12g35050 | outative protein kinase contains a prot  | protein kinase family protein                              | 360  | 464  | 440  | 537  | 598  | 426  | 421  | 520  | 0.81 | 0.189533 | 365      | 328  | 359  | 493  | 427  | 365  | 438  | 395  | 350  | 422  | 0.83 | 0.086113 | 425      | 0.82 | 0.147180 |          |
| 267423_at   | A12g35060 | putative potassium transporter           | putative potassium transporter family protein              | 121  | 239  | 270  | 378  | 404  | 305  | 175  | 363  | 0.48 | 0.013580 | 146      | 137  | 142  | 150  | 142  | 332  | 284  | 317  | 312  | 350  | 0.45 | 0.001355 | 344      | 0.32 | 0.010490 |          |
| 267424_at   | A12g34800 | hypothetical protein predicted by oensc  | hypothetical protein                                       | 5    | 2    | 2    | 2    | 1    | 2    | 3    | 2    | 1.42 | 0.437414 | 2        | 3    | 2    | 3    | 4    | 3    | 3    | 1    | 2    | 3    | 0.79 | 0.408132 | 3        | 0.68 | 0.125926 |          |
| 267425_at   | A12g34810 | putative berberine bridge enzyme         | FAD-binding domain-containing protein                      | 354  | 370  | 352  | 682  | 836  | 618  | 359  | 712  | 0.50 | 0.005578 | 272      | 255  | 286  | 443  | 372  | 311  | 469  | 459  | 271  | 411  | 0.66 | 0.013994 | 375      | 0.72 | 0.056178 |          |
| 267426_at   | A12g34820 | hypothetical protein predicted by gencs  | basic helix-loop-helix (bHLH) family prot                  | 51   | 59   | 62   | 64   | 70   | 65   | 57   | 66   | 0.87 | 0.076155 | 47       | 54   | 58   | 48   | 49   | 40   | 52   | 58   | 53   | 49   | 1.08 | 0.413482 | 46       | 1.17 | 0.130598 |          |
| 267427_at   | A12g34830 | putative ARK4-type DNA binding protein   | putative ARK4-type DNA binding protein                     | 26   | 42   | 38   | 46   | 36   | 42   | 38   | 43   | 0.81 | 0.203584 | 26       | 34   | 38   | 34   | 34   | 29   | 27   | 12   | 27   | 27   | 1.02 | 0.879752 | 30       | 0.88 | 0.019180 |          |
| 267428_at   | A12g34840 | putative catomper epsilon subunit        | catomper protein epsilon subunit family v                  | 37   | 36   | 39   | 43   | 42   | 40   | 37   | 41   | 0.90 | 0.040943 | 34       | 29   | 27   | 25   | 21   | 22   | 28   | 26   | 27   | 24   | 1.09 | 0.277269 | 23       | 1.17 | 0.080521 |          |
| 267429_at   | A12g34850 | putative UDP-galactose-4-epimerase       | NAD-dependent isomerase/dehydrogenase                      | 37   | 46   | 60   | 52   | 51   | 52   | 48   | 52   | 0.92 | 0.567408 | 35       | 29   | 31   | 33   | 32   | 26   | 34   | 29   | 32   | 31   | 1.03 | 0.711992 | 30       | 1.05 | 0.645588 |          |
| 267430_at   | A12g34860 | unknown protein                          | chaperone protein dnaJ-related                             | 218  | 374  | 370  | 367  | 383  | 315  | 320  | 355  | 0.90 | 0.567294 | 319      | 380  | 346  | 480  | 348  | 372  | 342  | 341  | 348  | 377  | 0.93 | 0.482091 | 400      | 0.87 | 0.309274 |          |
| 267431_at   | A12g34870 | unknown protein                          | autophagy full-length hydroxylase-rich alvococtin family c | 108  | 210  | 98   | 949  | 578  | 438  | 139  | 845  | 0.22 | 0.034584 | 187      | 176  | 245  | 888  | 595  | 621  | 567  | 504  | 665  | 655  | 0.31 | 0.001363 | 702      | 0.29 | 0.006675 |          |
| 267432_at   | A12g35020 | putative UDP-N-acetylglucosamine pyru    | UTP--glucose-1-phosphate uridylyltransfer                  | 223  | 295  | 306  | 414  | 504  | 382  | 275  | 428  | 0.64 | 0.034655 | 286      | 271  | 300  | 563  | 428  | 407  | 467  | 473  | 287  | 472  | 0.81 | 0.002313 | 486      | 0.82 | 0.022271 |          |
| 267433_at   | A12g26350 | putative peroxisome assembly protein I   | zinc-binding peroxisomal integral membe                    | 113  | 165  | 159  | 176  | 195  | 146  | 146  | 172  | 0.85 | 0.287480 | 142      | 131  | 150  | 203  | 158  | 166  | 145  | 138  | 141  | 162  | 0.87 | 0.225572 | 176      | 0.80 | 0.078439 |          |
| 267434_at   | A12g26260 | 3-beta-hydroxysteroid dehydrogenase      | 3-beta-hydroxysteroid dehydrogenase/is                     | 75   | 99   | 87   | 131  | 132  | 105  | 87   | 123  | 0.71 | 0.033340 | 76       | 69   | 80   | 117  | 94   | 80   | 86   | 78   | 75   | 91   | 0.82 | 0.145679 | 97       | 0.77 | 0.119471 |          |
| 267400_at   | A12g26240 | unknown protein                          | expressed protein                                          | 366  | 452  | 548  | 548  | 586  | 499  | 455  | 544  | 0.84 | 0.201897 | 534      | 580  | 537  | 784  | 547  | 598  | 607  | 593  | 550  | 626  | 0.88 | 0.222221 | 643      | 0.86 | 0.275222 |          |
| 267401_at   | A12g26210 | unknown protein                          | ankyrin repeat family protein                              | 172  | 267  | 278  | 281  | 321  | 231  | 239  | 277  | 0.86 | 0.415697 | 258      | 320  | 275  | 448  | 335  | 356  | 307  | 284  | 285  | 346  | 0.82 | 0.175891 | 380      | 0.75 | 0.072478 |          |
| 267402_at   | A12g26180 | unknown protein                          | putative SF16 protein (Heliantus annu                      | 135  | 187  | 154  | 240  | 266  | 231  | 159  | 246  | 0.65 | 0.009551 | 138      | 153  | 182  | 252  | 206  | 177  | 167  | 173  | 158  | 195  | 0.81 | 0.158865 | 211      | 0.75 | 0.104529 |          |
| 267403_at   | A12g26320 | MADS-box protein (AGL33)                 | MADS-box protein (AGL33)                                   | 16   | 8    | 12   | 12   | 14   | 12   | 12   | 13   | 0.97 | 0.887699 | 8        | 10   | 13   | 11   | 12   | 12   | 11   | 13   | 10   | 12   | 0.86 | 0.173220 | 12       | 0.87 | 0.345500 |          |
| 267372_at   | A12g26290 | putative protein kinase contains a prote | protein kinase, putative                                   | 15   | 17   | 20   | 20   | 19   | 24   | 19   | 24   | 19   | 0.88     | 0.453699 | 19   | 22   | 23   | 22   | 14   | 19   | 20   | 22   | 21   | 10   | 1.08     | 0.458309 | 18   | 1.15     | 0.329499 |
| 267373_at   | A12g26280 | unknown protein                          | smr (Small Smalls Related) domain-conta                    | 70   | 100  | 91   | 109  | 115  | 100  | 87   | 108  | 0.51 | 0.104829 | 105      | 92   | 94   | 108  | 96   | 96   | 108  | 107  | 97   | 103  | 0.94 | 0.294713 | 110      | 0.97 | 0.636463 |          |
| 267374_at   | A12g26230 | putative uracil subunit similar to nodc  | uracil / urate oxidase / nodulin 35, outi                  | 215  | 277  | 308  | 340  | 352  | 315  | 267  | 336  | 0.79 | 0.077667 | 310      | 358  | 315  | 494  | 376  | 354  | 353  | 332  | 327  | 382  | 0.86 | 0.223584 | 408      | 0.80 | 0.155254 |          |
| 267375_at   | A12g26300 | unknown protein                          | G protein alpha subunit 1 (GPA1) inte                      | 405  | 427  | 530  | 561  | 617  | 483  | 454  | 554  | 0.82 | 0.142835 | 514      | 539  | 489  | 728  | 636  | 544  | 621  | 601  | 514  | 627  | 0.82 | 0.033932 | 636      | 0.81 | 0.091181 |          |
| 267376_at   | A12g26330 | unknown protein                          | putative rector-1-like protein kinase. E                   | 1423 | 2005 | 1666 | 1863 | 2357 | 1588 | 1698 | 1936 | 0.88 | 0.444619 | 1280     | 1164 | 1277 | 1631 | 1482 | 1258 | 1623 | 1581 | 1240 | 1515 | 0.82 | 0.029556 | 1457     | 0.85 | 0.132138 |          |
| 267377_at   | A12g26250 | beta-ketoadyl-CoA synthase (FIDDLEH      | beta-ketoadyl-CoA synthase family (FID)                    | 2173 | 2304 | 2552 | 2478 | 2626 | 2205 | 2343 | 2436 | 0.96 | 0.604678 | 1803     | 1931 | 2021 | 2518 | 2049 | 1778 | 2225 | 2213 | 1918 | 2157 | 0.89 | 0.205638 | 2115     | 0.91 | 0.431460 |          |
| 267378_at   | A12g26200 | hypothetical protein                     | expressed protein                                          | 213  | 287  | 306  | 345  | 406  | 310  | 268  | 354  | 0.76 | 0.090972 | 181      | 159  | 190  | 233  | 122  | 198  | 240  | 221  | 177  | 221  | 0.80 | 0.090032 | 215      | 0.82 | 0.046422 |          |
| 267379_at   | A12g26340 | unknown protein : supported by cDNA:     | expressed protein                                          | 230  | 364  | 368  | 340  | 390  | 306  | 321  | 346  | 0.93 | 0.657862 | 317      | 374  | 343  | 507  | 367  | 376  | 451  | 416  | 345  | 423  | 0.81 | 0.074729 | 416      | 0.83 | 0.212547 |          |
| 267380_at   | A12g26170 | putative thromboxane-A synthase : su     | thromboxane-A synthase, putative / cvt                     | 176  | 203  | 291  | 410  | 288  | 316  | 223  | 338  | 0.66 | 0.086568 | 540      | 552  | 548  | 971  | 699  | 682  | 884  | 907  | 547  | 828  | 0.66 | 0.011036 | 784      | 0.70 | 0.064705 |          |
| 267381_at   | A12g26190 | unknown protein : supported by cDNA:     | calmodulin-binding family protein                          | 206  | 192  | 226  | 177  | 219  | 156  | 208  | 184  | 1.13 | 0.308942 | 96       | 99   | 95   | 106  | 97   | 92   | 129  | 114  | 97   | 108  | 1.00 | 0.205935 | 98       | 0.98 | 0.691667 |          |
| 267382_at   | A12g44300 | unknown protein                          | lipid transfer protein-related                             | 45   | 54   | 63   | 64   | 65   | 45   | 54   | 63   | 0.74 | 0.034564 | 61       | 69   | 71   | 72   | 64   | 68   | 76   | 67   | 67   | 67   | 1.01 | 0.855715 | 61       | 0.85 | 0.259346 |          |
| 267383_at   | A12g43360 | unknown protein                          | expressed protein                                          | 189  | 235  | 242  | 237  | 274  | 215  | 222  | 242  | 0.92 | 0.453119 | 276      | 299  | 269  | 362  | 316  | 313  | 286  | 273  | 281  | 316  | 0.89 | 0.262914 | 341      | 0.83 | 0.095243 |          |
| 267384_at   | A12g44370 | unknown protein highly similar to GP12   | DC1 domain-containing protein                              | 25   | 32   | 28   | 29   | 39   | 30   | 29   | 33   | 0.87 | 0.337676 | 24       | 36   | 33   | 22   | 28   | 31   | 28   | 27   | 31   | 27   | 1.12 | 0.352343 | 27       | 1.13 | 0.473622 |          |
| 267385_at   | A12g43380 | unknown protein highly similar to GP12   | DC1 domain-containing protein                              | 18   | 18   | 26   | 26   | 26   | 26   | 21   | 26   | 0.80 | 0.121495 | 17       | 20   | 20   | 17   | 15   | 13   | 21   | 19   | 19   | 17   | 1.11 | 0.353620 | 15       | 1.25 | 0.080717 |          |
| 267386_at   | A12g44430 | unknown protein                          | DNA-binding bromodomain-containin                          | 72   | 91   | 101  | 105  | 134  | 95   | 84   | 105  | 0.61 | 0.031539 | 61       | 69   | 71   | 67   | 58   | 60   | 61   | 52   | 61   | 52   | 0.61 | 0.038117 | 61       | 0.85 | 0.120894 |          |
| 267387_at   | A12g44440 | hypothetical protein predicted by oensc  | envy N terminus domain-containin                           | 147  | 174  | 179  | 204  | 197  | 182  | 167  | 194  | 0.86 | 0.028984 | 131      | 135  | 170  | 195  | 168  | 144  | 171  | 155  | 145  | 167  | 0.87 | 0.189917 | 169      | 0.86 | 0.258483 |          |
| 267388_at   | A12g44450 | putative beta-glucosidase                | glycosyl hydrolase family 1 protein                        | 235  | 265  | 292  | 410  | 355  | 353  | 264  | 373  | 0.71 | 0.010202 | 369      | 340  | 428  | 661  | 505  | 473  | 506  | 505  | 379  | 530  | 0.72 | 0.020520 | 546      | 0.69 | 0.058393 |          |
| 267389_at   | A12g44460 | putative beta-glucosidase                | glycosyl hydrolase family 1 protein                        | 48   | 60   | 89   | 267  | 107  | 137  | 66   | 170  | 0.39 | 0.108147 | 141      | 137  | 173  | 209  | 198  | 149  | 173  | 160  | 150  | 178  | 0.84 | 0.186988 | 185      | 0.81 | 0.181630 |          |
| 267390_at   | A12g44470 | putative beta-glucosidase                | glycosyl hydrolase family 1 protein                        | 35   | 31   | 38   | 62   | 71   | 58   | 35   | 63   | 0.55 | 0.023792 | 15       | 14   | 18   | 27   | 24   | 18   | 20   | 16   | 15   | 21   | 0.73 | 0.091072 | 23       | 0.72 | 0.077442 |          |
| 267391_at   | A12g44480 | putative beta-glucosidase                | glycosyl hydrolase family 1 protein                        | 18   | 17   | 25   | 18   | 20   | 18   | 20   | 19   | 1.05 | 0.728840 | 16       | 16   | 15   | 17   | 13   | 18   | 18   | 16   | 16   | 17   | 0.94 | 0.457193 | 16       | 0.97 | 0.779905 |          |
| 267392_at   | A12g44490 | putative beta-glucosidase                | glycosyl hydrolase family 1 protein                        | 160  | 205  | 235  | 189  | 219  | 131  | 200  | 180  | 1.11 | 0.581283 | 165      | 133  | 130  | 178  | 147  | 150  | 198  | 191  | 143  | 173  | 0.83 | 0.131628 | 158      | 0.90 | 0.360199 |          |
| 267393_at   | A12g44500 | similar to ax1 l protein from Nicotiana  | t expressed protein                                        | 258  | 249  | 255  | 285  | 376  | 204  | 254  | 288  | 0.88 | 0.528736 | 7        | 12   | 139  | 101  | 141  | 127  | 120  | 164  | 165  | 122  | 143  | 0.85     | 0.200663 | 129  | 0.94     | 0.602031 |
| 267394_s_at | A12g44540 | putative cellulase                       | glycosyl hydrolase family 9 protein III ch                 | 11   | 8    | 12   | 12   | 8    | 12   | 10   | 8    | 1.11 | 0.98     | 0.854645 | 7    | 11   | 12   | 9    | 8    | 8    | 7    | 10   | 9    | 1.19 | 0.284985 | 8        | 1.22 | 0.344586 |          |
| 267395_at   | A12g44520 | unknown protein                          | expressed protein                                          | 21   | 18   | 22   | 12   | 19   | 21   | 18   | 21   | 0.85 | 0.213351 | 15       | 16   | 15   | 18   | 15   | 21   | 17   | 18   | 15   | 9    | 1.18 | 0.422461 | 16       | 1.45 | 0.126203 |          |
| 267396_at   | A12g44270 | hypothetical protein predicted by grai   | a expressed protein                                        | 244  | 335  | 381  | 357  | 459  | 304  | 320  | 373  | 0.86 | 0.430028 | 360      | 314  | 315  | 492  | 436  | 432  | 407  | 373  | 330  | 428  | 0.77 | 0.013499 | 453      | 0.73 | 0.007478 |          |
| 267397_at   | A1g76170  | hypothetical protein predicted by bencs  | expressed protein                                          | 136  | 189  | 204  | 180  | 220  | 185  | 176  | 195  | 0.90 | 0.485803 | 191      | 207  | 210  | 305  | 238  | 216  | 236  | 245  | 203  | 248  | 0.82 | 0.070251 | 253      | 0.80 | 0.141567 |          |
| 267398_at   | A12g44560 | putative glucanase                       | glycosyl hydrolase family 9 protein III ch                 | 11   | 12   | 18   | 12   | 11   | 8    | 13   | 10   | 1.33 | 0.225070 | 12       | 14   | 17   | 8    | 10   | 8    | 11   | 7    | 14   | 9    | 1.84 | 0.005247 | 9        | 1.67 | 0.015431 |          |
| 267399_at   | A12g41950 | hypothetical protein predicted by oensc  | hypothetical protein                                       | 15   | 16   | 15   | 12   | 16   | 15   | 16   | 15   | 0.85 | 0.141539 |          |      |      |      |      |      |      |      |      |      |      |          |          |      |          |          |

|             |           |                                                   |                                                        |      |      |       |      |      |      |      |      |          |           |      |      |      |      |      |      |      |      |      |      |          |          |      |           |          |
|-------------|-----------|---------------------------------------------------|--------------------------------------------------------|------|------|-------|------|------|------|------|------|----------|-----------|------|------|------|------|------|------|------|------|------|------|----------|----------|------|-----------|----------|
| 267326_at   | A12g19380 | putative RNA-binding protein                      | RNA recognition motif (RRM)-containing                 | 40   | 51   | 48    | 52   | 61   | 51   | 46   | 54   | 0.85     | 0.158960  | 36   | 32   | 43   | 53   | 45   | 37   | 40   | 37   | 42   | 0.88 | 0.302599 | 45       | 0.82 | 0.231630  |          |
| 267327_at   | A12g19410 | putative protein kinase contains a prote          | protein kinase family protein                          | 23   | 25   | 26    | 25   | 31   | 29   | 25   | 28   | 0.88     | 0.171312  | 27   | 26   | 27   | 20   | 21   | 23   | 24   | 19   | 27   | 21   | 1.25     | 0.003364 | 21   | 1.26      | 0.003571 |
| 267328_at   | A12g19230 | putative receptor-like protein kinase             | leucine-rich repeat protein kinase, outati             | 27   | 27   | 47    | 46   | 44   | 44   | 34   | 45   | 0.75     | 0.181002  | 23   | 27   | 37   | 25   | 34   | 26   | 30   | 24   | 29   | 28   | 1.04     | 0.798964 | 28   | 1.02      | 0.922234 |
| 267329_at   | A12g19250 | putative protein kinase                           | pseudokinase, similar to Mammalian-chel                | 21   | 21   | 29    | 34   | 20   | 26   | 34   | 0.92 | 0.052268 | 20        | 34   | 29   | 34   | 29   | 27   | 26   | 26   | 26   | 26   | 0.98 | 0.875531 | 29       | 0.98 | 0.862712  |          |
| 267330_at   | A12g19270 | unknown protein                                   | expressed protein                                      | 372  | 461  | 460   | 484  | 523  | 373  | 431  | 460  | 0.94     | 0.614933  | 362  | 325  | 371  | 556  | 387  | 394  | 388  | 432  | 353  | 431  | 0.82     | 0.125220 | 445  | 0.79      | 0.176762 |
| 267331_at   | A12g19280 | putative salt-inducible protein                   | pentatricopeptide (PPR) repeat-containin               | 52   | 62   | 49    | 76   | 76   | 70   | 61   | 74   | 0.83     | 0.075964  | 38   | 36   | 44   | 48   | 36   | 53   | 45   | 39   | 44   | 0.90 | 0.376386 | 40       | 0.98 | 0.837107  |          |
| 267332_at   | A12g19290 | hypothetical protein predicted by gene            | expressed protein                                      | 17   | 22   | 20    | 21   | 22   | 16   | 20   | 20   | 1.00     | 0.977134  | 17   | 23   | 20   | 22   | 16   | 14   | 20   | 18   | 20   | 1.10 | 0.455043 | 17       | 1.14 | 0.4447036 |          |
| 267333_at   | A12g19300 | unknown protein                                   | WD-40 repeat protein contains a                        | 282  | 282  | 308   | 372  | 239  | 284  | 318  | 0.91 | 0.101988 | 273       | 204  | 309  | 349  | 309  | 349  | 304  | 349  | 319  | 304  | 0.88 | 0.165537 | 365      | 0.88 | 0.2571719 |          |
| 267334_at   | A12g19420 | hypothetical protein predicted by gene            | hypothetical protein                                   | 11   | 17   | 18    | 19   | 20   | 23   | 15   | 20   | 0.76     | 0.113670  | 7    | 16   | 11   | 14   | 11   | 9    | 15   | 13   | 11   | 12   | 0.90     | 0.647750 | 11   | 0.99      | 0.985183 |
| 267335_s_at | A12g19440 | putative beta-1,3-glucanase                       | olivosyl hydrolase famly 17 protein /// o              | 140  | 150  | 144   | 189  | 224  | 165  | 145  | 193  | 0.75     | 0.050841  | 101  | 90   | 91   | 152  | 105  | 96   | 131  | 137  | 94   | 124  | 0.76     | 0.077995 | 118  | 0.80      | 0.259526 |
| 267336_at   | A12g19310 | putative small heat shock protein                 | -sior expressed protein                                | 293  | 401  | 266   | 537  | 824  | 446  | 320  | 602  | 0.53     | 0.080200  | 356  | 278  | 357  | 420  | 337  | 329  | 395  | 396  | 330  | 375  | 0.88     | 0.189080 | 362  | 0.91      | 0.460082 |
| 267339_at   | A12g19385 | Expressed protein                                 | : supported by full-le expressed protein               | 202  | 225  | 232   | 246  | 258  | 218  | 220  | 241  | 0.91     | 0.222453  | 207  | 208  | 236  | 320  | 248  | 238  | 266  | 243  | 217  | 263  | 0.83     | 0.073949 | 269  | 0.81      | 0.173697 |
| 267273_at   | A12g19350 | unknown protein                                   | : supported by full-le expressed protein               | 169  | 296  | 309   | 339  | 271  | 243  | 306  | 0.79 | 0.215762 | 193       | 258  | 223  | 351  | 250  | 271  | 238  | 229  | 255  | 268  | 0.84 | 0.233753 | 291      | 0.77 | 0.145186  |          |
| 267279_at   | A12g19460 | hypothetical protein predicted by gene            | expressed protein                                      | 30   | 54   | 37    | 49   | 53   | 40   | 41   | 47   | 0.86     | 0.0447261 | 31   | 32   | 32   | 39   | 32   | 30   | 32   | 33   | 32   | 33   | 0.95     | 0.435987 | 34   | 0.93      | 0.468653 |
| 267280_at   | A12g19450 | diacylglycerol O-acyltransferase                  | diacylglycerol O-acyltransferase / acyl C              | 129  | 167  | 210   | 209  | 273  | 197  | 169  | 226  | 0.75     | 0.159300  | 171  | 125  | 165  | 194  | 185  | 181  | 213  | 213  | 154  | 197  | 0.78     | 0.020750 | 186  | 0.82      | 0.093137 |
| 267281_at   | A12g19400 | putative protein kinase contains a prote          | protein kinase, putative                               | 41   | 49   | 58    | 57   | 73   | 59   | 50   | 63   | 0.79     | 0.124408  | 38   | 38   | 44   | 44   | 38   | 39   | 47   | 38   | 40   | 41   | 0.98     | 0.772910 | 40   | 1.00      | 0.990190 |
| 267282_at   | A12g19390 | unknown protein                                   | : supported by cDNA, expressed protein                 | 74   | 89   | 97    | 105  | 126  | 95   | 86   | 109  | 0.80     | 0.125924  | 42   | 42   | 53   | 61   | 46   | 47   | 57   | 51   | 46   | 52   | 0.87     | 0.191196 | 51   | 0.89      | 0.300550 |
| 267283_at   | A12g23720 | Mutator-like transposase similar to MUI           | hypothetical protein /// Mutator-like trans            | 8    | 5    | 9     | 6    | 8    | 6    | 7    | 7    | 1.12     | 0.539814  | 6    | 7    | 11   | 5    | 8    | 5    | 15   | 5    | 8    | 7    | 1.03     | 0.927612 | 6    | 1.30      | 0.366501 |
| 267284_at   | A12g23700 | unknown protein predicted by gencan               | expressed protein                                      | 274  | 380  | 331   | 453  | 468  | 368  | 328  | 430  | 0.76     | 0.080165  | 315  | 253  | 333  | 544  | 440  | 358  | 440  | 300  | 439  | 0.68 | 0.019416 | 447      | 0.67 | 0.066078  |          |
| 267285_at   | A12g23690 | unknown protein                                   | expressed protein                                      | 205  | 213  | 235   | 213  | 234  | 160  | 218  | 202  | 1.08     | 0.551492  | 242  | 262  | 233  | 327  | 215  | 228  | 230  | 256  | 251  | 0.98 | 0.086472 | 256      | 0.96 | 0.796637  |          |
| 267286_at   | A12g23640 | putative seed maturation protein                  | reticulin family protein (RTNLB13)                     | 30   | 40   | 45    | 88   | 55   | 42   | 38   | 62   | 0.62     | 0.176101  | 29   | 24   | 38   | 34   | 32   | 32   | 30   | 27   | 30   | 31   | 0.98     | 0.895188 | 33   | 0.93      | 0.639451 |
| 267287_at   | A12g23630 | putative pectinesterase                           | multi-cooper oxidase type I family protein             | 33   | 32   | 50    | 46   | 38   | 37   | 38   | 40   | 0.95     | 0.778601  | 39   | 30   | 39   | 38   | 29   | 37   | 37   | 43   | 36   | 37   | 0.97     | 0.817801 | 34   | 1.04      | 0.772600 |
| 267288_at   | A12g23680 | similar to cold acclimation protein               | WCC stress-responsive protein, putative                | 32   | 30   | 40    | 35   | 38   | 35   | 34   | 36   | 0.95     | 0.648708  | 24   | 21   | 29   | 27   | 23   | 26   | 35   | 27   | 25   | 28   | 0.90     | 0.414805 | 26   | 0.97      | 0.811997 |
| 267289_at   | A12g23770 | putative protein kinase contains a prote          | protein kinase family protein / oetidoov               | 19   | 17   | 23    | 17   | 19   | 19   | 20   | 18   | 1.08     | 0.485518  | 14   | 14   | 15   | 16   | 11   | 13   | 16   | 15   | 14   | 14   | 1.02     | 0.842157 | 13   | 1.08      | 0.508120 |
| 267290_at   | A12g23750 | putative SET-domain transcriptional re            | SET domain-containing protein                          | 164  | 190  | 191   | 184  | 214  | 182  | 182  | 193  | 0.94     | 0.424587  | 129  | 101  | 139  | 136  | 126  | 95   | 146  | 129  | 123  | 126  | 0.97     | 0.808841 | 119  | 1.03      | 0.826619 |
| 267291_at   | A12g23740 | putative C2H2-type zinc finger protein            | zinc finger (C2H2 type) family protein                 | 115  | 143  | 139   | 169  | 171  | 122  | 132  | 154  | 0.86     | 0.255448  | 50   | 50   | 51   | 56   | 48   | 48   | 57   | 56   | 51   | 53   | 0.96     | 0.479774 | 50   | 1.01      | 0.920293 |
| 267292_at   | A12g23730 | hypothetical protein predicted by gene            | expressed protein                                      | 37   | 43   | 47    | 56   | 61   | 47   | 42   | 54   | 0.78     | 0.066940  | 24   | 21   | 28   | 25   | 25   | 26   | 37   | 31   | 24   | 29   | 0.84     | 0.226618 | 26   | 0.96      | 0.614761 |
| 267293_at   | A12g23810 | hypothetical protein                              | sensence-associated family protein                     | 1933 | 1627 | 2457  | 2576 | 2747 | 1998 | 2006 | 2441 | 0.82     | 0.260132  | 1371 | 1514 | 1275 | 1739 | 1397 | 1363 | 1615 | 1583 | 1387 | 1540 | 0.90     | 0.201240 | 1500 | 0.92      | 0.460162 |
| 267294_at   | A12g23670 | hypothetical protein predicted by gene            | expressed protein                                      | 206  | 327  | 278   | 334  | 285  | 230  | 283  | 0.96 | 0.803585 | 299       | 334  | 357  | 541  | 354  | 344  | 437  | 406  | 330  | 416  | 0.79 | 0.127470 | 413      | 0.80 | 0.277703  |          |
| 267295_at   | A12g23890 | putative acyltransferase                          | acetyltransferase / acyltransferase synthase           | 24   | 24   | 35    | 30   | 35   | 24   | 28   | 32   | 0.84     | 0.217839  | 28   | 27   | 31   | 32   | 31   | 34   | 32   | 34   | 31   | 0.98 | 0.301947 | 34       | 0.99 | 0.655079  |          |
| 267296_at   | A12g23660 | hypothetical protein predicted by gene            | LOB domain family protein / lateral orapi              | 51   | 66   | 53    | 59   | 67   | 55   | 57   | 60   | 0.95     | 0.608969  | 58   | 57   | 68   | 51   | 54   | 50   | 66   | 64   | 61   | 57   | 1.07     | 0.425835 | 51   | 1.19      | 0.062633 |
| 267297_at   | A12g23780 | putative RING zinc finger protein                 | -suzc zinc finger (C3HC4-type RING finger)             | 153  | 230  | 247   | 291  | 309  | 243  | 210  | 281  | 0.75     | 0.111890  | 218  | 297  | 255  | 438  | 297  | 281  | 307  | 318  | 257  | 328  | 0.78     | 0.132527 | 339  | 0.76      | 0.210150 |
| 267298_at   | A12g23760 | putative homeodomain transcription fac            | BE1-like homeobox 4 protein (BLH4)                     | 26   | 35   | 28    | 43   | 43   | 32   | 29   | 39   | 0.74     | 0.098949  | 31   | 24   | 23   | 37   | 33   | 34   | 31   | 29   | 26   | 32   | 0.81     | 0.048377 | 34   | 0.77      | 0.038074 |
| 267299_at   | A12g23190 | putative glucosyltransferase                      | UDP-glucuronosyl/UDP-glucosyl transfe                  | 106  | 155  | 172   | 255  | 253  | 221  | 156  | 243  | 0.96     | 0.035407  | 143  | 148  | 168  | 272  | 205  | 175  | 219  | 209  | 153  | 215  | 0.71     | 0.048703 | 251  | 0.71      | 0.104969 |
| 267300_at   | A12g23140 | putative glucosyltransferase                      | UDP-glucuronosyl/UDP-glucosyl transfe                  | 34   | 37   | 46    | 48   | 47   | 34   | 39   | 43   | 0.90     | 0.484063  | 48   | 46   | 46   | 45   | 36   | 34   | 57   | 63   | 47   | 47   | 0.99     | 0.961161 | 38   | 1.21      | 0.067138 |
| 267301_at   | A12g23110 | ubiquitin activating enzyme 1 (UBA1)              | ubiquitin activating enzyme 1 (UBA1)                   | 1046 | 1104 | 1189  | 1480 | 1691 | 1231 | 1143 | 1468 | 0.78     | 0.083772  | 1237 | 860  | 1155 | 1481 | 1294 | 1123 | 1308 | 1084 | 1306 | 0.83 | 0.086770 | 1299     | 0.83 | 0.234841  |          |
| 267302_at   | A12g23100 | putative unknown protein, leucine-rich            | ubiquitin family protein                               | 188  | 239  | 221   | 293  | 296  | 232  | 216  | 274  | 0.79     | 0.087105  | 230  | 259  | 253  | 364  | 270  | 284  | 268  | 247  | 296  | 0.83 | 0.091576 | 310      | 0.80 | 0.102578  |          |
| 267303_at   | A12g23090 | hookless-like protein                             | GCN5-related N-acetyltransferase (GNA                  | 46   | 52   | 72    | 82   | 84   | 56   | 72   | 57   | 0.83     | 0.062326  | 41   | 31   | 28   | 38   | 47   | 41   | 41   | 48   | 48   | 48   | 0.98     | 0.605159 | 48   | 0.99      | 0.07672  |
| 267304_at   | A12g23080 | putative Fx(II) transport protein                 | metal transporter, putative (ZIF6)                     | 282  | 343  | 411   | 455  | 447  | 393  | 345  | 432  | 0.80     | 0.109760  | 394  | 377  | 460  | 677  | 528  | 475  | 426  | 441  | 410  | 509  | 0.81     | 0.092639 | 560  | 0.73      | 0.084756 |
| 267305_at   | A12g23070 | high affinity K <sup>+</sup> transporter (AKUP1A) | potassium transporter (KUP1)                           | 210  | 328  | 30072 | 269  | 305  | 228  | 280  | 267  | 1.05     | 0.778728  | 292  | 283  | 288  | 341  | 295  | 265  | 348  | 333  | 288  | 317  | 0.91     | 0.225046 | 300  | 0.96      | 0.604793 |
| 267306_at   | A12g23060 | Ran binding protein (ARanBP1b)                    | Ran-binding protein 1b (RanBP1b)                       | 470  | 602  | 574   | 761  | 780  | 661  | 549  | 734  | 0.75     | 0.026986  | 721  | 778  | 742  | 1080 | 776  | 739  | 659  | 632  | 747  | 777  | 0.96     | 0.787260 | 865  | 0.86      | 0.340999 |
| 267307_at   | A12g23010 | putative lacase                                   | lacase, putative / dihydro oron bi                     | 43   | 40   | 41    | 72   | 71   | 78   | 55   | 74   | 0.74     | 0.224835  | 35   | 38   | 31   | 47   | 38   | 31   | 47   | 38   | 35   | 39   | 1.31     | 0.485384 | 33   | 1.05      | 0.638966 |
| 267308_at   | A12g23020 | putative malonate-CoA acyl carrier pro            | expressed protein                                      | 389  | 442  | 420   | 430  | 632  | 526  | 420  | 569  | 0.70     | 0.010295  | 474  | 520  | 645  | 946  | 707  | 755  | 642  | 617  | 773  | 546  | 0.77     | 0.148923 | 782  | 0.70      | 0.042879 |
| 267274_at   | A12g23160 | putative mitochondrial carrier protein            | : mitochondrial dihydroxy succinate carrier family pro | 87   | 130  | 138   | 120  | 134  | 113  | 118  | 123  | 0.96     | 0.803136  | 90   | 104  | 110  | 145  | 107  | 110  | 115  | 104  | 101  | 116  | 0.87     | 0.229197 | 120  | 0.84      | 0.235872 |
| 267275_at   | A12g23040 | putative Na H antiporter                          | cation/hydrogen exchanger, putative (C)                | 15   | 36   | 45    | 43   | 40   | 37   | 42   | 0.89 | 0.307114 | 24        | 37   | 35   | 38   | 26   | 30   | 39   | 32   | 32   | 33   | 0.90 | 0.772239 | 32       | 1.01 | 0.995952  |          |
| 267276_at   | A12g23130 | hypothetical protein predicted by gene            | LOB domain protein 12 / lateral oron bi                | 15   | 13   | 17    | 18   | 19   | 17   | 15   | 18   | 0.81     | 0.036336  | 12   | 12   | 11   | 11   | 11   | 12   | 11   | 11   | 11   | 1.00 | 0.996717 | 11       | 1.02 | 0.744028  |          |
| 267277_at   | A12g23050 | putative protein kinase                           | SEC1 transact protein kinase / WD-40 repeat            | 394  | 410  | 491   | 489  | 540  | 418  | 340  | 412  | 0.84     | 0.141144  | 463  | 463  | 443  | 458  | 443  | 458  | 443  | 458  | 443  | 458  | 0.95     | 0.573609 | 488  | 0.94      | 0.616588 |
| 267246_at   | A12g23250 | putative WRKY-type DNA binding orde               | WRKY family transcription factor                       | 36   | 40   | 59    | 36   | 3    |      |      |      |          |           |      |      |      |      |      |      |      |      |      |      |          |          |      |           |          |

|             |           |                                                                                      |      |      |      |      |      |      |      |      |          |          |      |      |      |      |      |      |      |      |          |      |          |          |          |          |          |          |
|-------------|-----------|--------------------------------------------------------------------------------------|------|------|------|------|------|------|------|------|----------|----------|------|------|------|------|------|------|------|------|----------|------|----------|----------|----------|----------|----------|----------|
| 267231_at   | A12g43900 | putative inositol polyphosphate 5'-phos endonuclease/exonuclease/phosphatase         | 64   | 77   | 88   | 85   | 90   | 69   | 76   | 81   | 0.94     | 0.613029 | 67   | 84   | 85   | 80   | 80   | 73   | 76   | 79   | 79       | 78   | 78       | 1.02     | 0.801818 | 78       | 1.02     | 0.859109 |
| 267232_at   | A12g44190 | hypothetical protein predicted by cense expressed protein                            | 152  | 230  | 224  | 245  | 249  | 207  | 202  | 233  | 0.87     | 0.337621 | 188  | 174  | 203  | 243  | 207  | 200  | 194  | 191  | 188      | 207  | 0.91     | 0.220929 | 217      | 0.87     | 0.139416 |          |
| 267233_s_at | A12g43920 | unknown protein                                                                      | 44   | 109  | 66   | 65   | 80   | 48   | 73   | 64   | 1.14     | 0.694677 | 64   | 83   | 53   | 69   | 51   | 51   | 71   | 68   | 67       | 62   | 1.08     | 0.808819 | 57       | 1.17     | 0.422439 |          |
| 267234_s_at | A12g43930 | putative protein kinase contains a proline                                           | 66   | 62   | 81   | 74   | 84   | 67   | 70   | 0.84 | 0.336438 | 54       | 65   | 64   | 64   | 45   | 45   | 45   | 51   | 41   | 40       | 46   | 1.01     | 0.945479 | 52       | 1.10     | 0.505035 |          |
| 267235_at   | A12g43940 | unknown protein                                                                      | 115  | 144  | 160  | 180  | 182  | 168  | 139  | 177  | 0.79     | 0.548665 | 173  | 199  | 180  | 273  | 220  | 201  | 187  | 188  | 184      | 214  | 0.86     | 0.227157 | 531      | 0.80     | 0.109354 |          |
| 267236_at   | A12g44100 | GDP dissociation inhibitor identical to C Rab GDP dissociation inhibitor (GDI1)      | 902  | 1069 | 1041 | 1411 | 1449 | 1189 | 1004 | 1350 | 0.74     | 0.022831 | 1093 | 1043 | 1185 | 1587 | 1427 | 1218 | 1375 | 1355 | 1107     | 1393 | 0.79     | 0.015380 | 1411     | 0.78     | 0.057153 |          |
| 267237_s_at | A12g44040 | unknown protein : supported by full-len endoproteolytic reductase family prot        | 102  | 179  | 174  | 202  | 223  | 172  | 160  | 199  | 0.81     | 0.113853 | 169  | 186  | 197  | 248  | 211  | 199  | 192  | 181  | 184      | 206  | 0.89     | 0.220304 | 219      | 0.84     | 0.104489 |          |
| 267238_at   | A12g44130 | unknown protein : supported by full-len endoproteolytic reductase family prot        | 81   | 222  | 137  | 88   | 104  | 69   | 153  | 87   | 2.11     | 0.144366 | 254  | 237  | 247  | 338  | 254  | 239  | 254  | 252  | 254      | 292  | 0.59     | 0.035175 | 318      | 1.10     | 0.260756 |          |
| 267211_at   | A12g44085 | Excessed protein : supported by full-len ribosomal protein L2 family protein         | 270  | 333  | 398  | 374  | 456  | 351  | 333  | 304  | 0.85     | 0.283372 | 362  | 368  | 352  | 546  | 418  | 406  | 420  | 408  | 367      | 399  | 0.84     | 0.093554 | 456      | 0.80     | 0.122855 |          |
| 267212_at   | A12g44060 | similar to late embryoenocic abundant late embryoenocic abundant family or           | 1264 | 1314 | 1450 | 2098 | 2162 | 1718 | 1373 | 1992 | 0.69     | 0.018870 | 1515 | 1573 | 1634 | 2291 | 1905 | 1739 | 1638 | 1614 | 1574     | 1837 | 0.86     | 0.167913 | 1978     | 0.80     | 0.072881 |          |
| 267213_at   | A12g44120 | 60S ribosomal protein L7 : supported by 60S ribosomal protein L7 (RPL7C)             | 1745 | 2148 | 2083 | 2086 | 2132 | 1784 | 1992 | 2001 | 1.00     | 0.960890 | 1716 | 1809 | 1882 | 2279 | 1895 | 1722 | 1923 | 1935 | 1802     | 1951 | 0.92     | 0.282626 | 1965     | 0.92     | 0.395587 |          |
| 267214_at   | A12g43970 | unknown protein : supported by cDNA: La domain-containing protein                    | 378  | 470  | 582  | 433  | 564  | 412  | 494  | 470  | 1.05     | 0.773254 | 348  | 352  | 374  | 425  | 395  | 338  | 507  | 478  | 358      | 429  | 0.84     | 0.133087 | 386      | 0.93     | 0.326629 |          |
| 267183_at   | A12g44020 | hypothetical protein predicted by cense mitochondrial transcription termination f    | 164  | 206  | 202  | 214  | 242  | 183  | 191  | 213  | 0.89     | 0.354718 | 154  | 137  | 168  | 208  | 183  | 180  | 202  | 200  | 153      | 195  | 0.78     | 0.005221 | 190      | 0.80     | 0.039638 |          |
| 267184_at   | A12g44150 | unknown protein : supported by cDNA: SET domain-containing protein (ASHH3            | 159  | 233  | 218  | 237  | 258  | 220  | 203  | 238  | 0.85     | 0.230507 | 179  | 169  | 202  | 270  | 208  | 196  | 219  | 203  | 183      | 219  | 0.84     | 0.107355 | 224      | 0.82     | 0.173649 |          |
| 267185_at   | A12g43950 | unknown protein : supported by cDNA: expressed protein                               | 181  | 218  | 229  | 284  | 276  | 238  | 209  | 266  | 0.79     | 0.051117 | 235  | 233  | 253  | 369  | 274  | 246  | 281  | 260  | 240      | 286  | 0.84     | 0.167748 | 296      | 0.81     | 0.211459 |          |
| 267186_at   | A12g44090 | unknown protein : supported by cDNA: expressed protein                               | 177  | 206  | 246  | 256  | 293  | 232  | 210  | 261  | 0.80     | 0.132004 | 177  | 161  | 188  | 219  | 208  | 196  | 219  | 224  | 216      | 275  | 0.87     | 0.081615 | 299      | 0.88     | 0.225283 |          |
| 267187_s_at | A12g44160 | putative methylenetetrahydrofolate red: methylenetetrahydrofolate reductase 2 (      | 318  | 366  | 362  | 485  | 450  | 384  | 349  | 440  | 0.79     | 0.052030 | 236  | 187  | 250  | 339  | 254  | 213  | 339  | 329  | 224      | 295  | 0.76     | 0.107351 | 299      | 0.83     | 0.347741 |          |
| 267188_at   | A12g44050 | 6.7-dimethyl-8-ribitylthiazine synthase 6.7-dimethyl-8-ribitylthiazine synthase / me | 380  | 510  | 472  | 587  | 625  | 529  | 454  | 580  | 0.78     | 0.057566 | 439  | 506  | 462  | 640  | 472  | 457  | 435  | 422  | 469      | 485  | 0.97     | 0.781068 | 523      | 0.90     | 0.434530 |          |
| 267189_at   | A12g44180 | putative methionine aminopeptidase : methionine aminopeptidase, putative / me        | 187  | 274  | 302  | 246  | 294  | 228  | 254  | 256  | 0.99     | 0.967645 | 241  | 259  | 237  | 348  | 276  | 263  | 271  | 269  | 246      | 285  | 0.86     | 0.116175 | 296      | 0.83     | 0.139456 |          |
| 267190_at   | A12g44170 | putative N-mystrolyltransferase : supporte enocis, myristoyl-CoA protein N-m         | 44   | 58   | 67   | 64   | 61   | 57   | 56   | 60   | 0.94     | 0.613219 | 46   | 56   | 50   | 61   | 51   | 54   | 55   | 64   | 51       | 57   | 0.89     | 0.146510 | 55       | 0.92     | 0.324882 |          |
| 267191_at   | A12g44110 | similar to Mlo proteins from H. vulgare : seven transmembrane MLO family prote       | 21   | 22   | 32   | 26   | 24   | 25   | 25   | 25   | 0.99     | 0.964980 | 22   | 25   | 20   | 26   | 20   | 25   | 24   | 25   | 23       | 1.08 | 0.439475 | 22       | 1.13     | 0.321023 |          |          |
| 267192_at   | A12g30890 | hypothetical protein predicted by graII membrane protein, putative                   | 94   | 113  | 95   | 153  | 203  | 139  | 101  | 165  | 0.61     | 0.035401 | 130  | 104  | 124  | 205  | 179  | 156  | 142  | 135  | 119      | 163  | 0.73     | 0.051659 | 180      | 0.68     | 0.020007 |          |
| 267193_at   | A12g30900 | hypothetical protein predicted by graII membrane protein, putative /// exresse       | 86   | 95   | 111  | 20   | 25   | 22   | 97   | 23   | 4.29     | 0.000554 | 107  | 124  | 93   | 21   | 19   | 18   | 26   | 5.42 | 0.000016 | 19   | 5.58     | 0.000643 |          |          |          |          |
| 267194_s_at | A12g30910 | putative ARP2/3 protein complex subunit transducin family protein / WD-40 repeat     | 147  | 199  | 186  | 229  | 241  | 192  | 177  | 221  | 0.80     | 0.112329 | 175  | 154  | 193  | 272  | 191  | 184  | 212  | 201  | 174      | 212  | 0.82     | 0.142559 | 216      | 0.81     | 0.241217 |          |
| 267195_at   | A12g30940 | putative protein kinase contains a prote protein kinase family protein               | 35   | 42   | 40   | 46   | 48   | 45   | 39   | 46   | 0.84     | 0.025671 | 28   | 27   | 32   | 26   | 30   | 31   | 31   | 29   | 30       | 37   | 0.655355 | 29       | 1.01     | 0.946987 |          |          |
| 267196_at   | A12g30950 | Flap protein (VAR2) identical to zinc: Flap proteinase (VAR2)                        | 352  | 518  | 566  | 609  | 631  | 434  | 479  | 558  | 0.86     | 0.426482 | 406  | 356  | 460  | 637  | 502  | 417  | 600  | 552  | 407      | 541  | 0.75     | 0.053414 | 518      | 0.79     | 0.019130 |          |
| 267197_at   | A12g30960 | hypothetical protein predicted by cense expressed protein                            | 52   | 77   | 79   | 127  | 120  | 101  | 69   | 116  | 0.60     | 0.015816 | 74   | 77   | 83   | 150  | 116  | 104  | 102  | 98   | 78       | 114  | 0.68     | 0.029224 | 123      | 0.63     | 0.030317 |          |
| 267198_at   | A12g30810 | putative gibberellin-regulated protein gibberellin-regulated family protein          | 8    | 9    | 7    | 9    | 10   | 7    | 8    | 9    | 0.91     | 0.526033 | 12   | 6    | 9    | 9    | 8    | 9    | 10   | 6    | 9        | 8    | 1.12     | 0.540049 | 8        | 1.11     | 0.618788 |          |
| 267199_at   | A12g30990 | hypothetical protein predicted by cense expressed protein // expressed protein       | 209  | 183  | 221  | 307  | 309  | 259  | 204  | 282  | 0.70     | 0.011888 | 285  | 315  | 280  | 379  | 274  | 234  | 420  | 383  | 203      | 338  | 0.87     | 0.386251 | 296      | 0.99     | 0.958897 |          |
| 267200_at   | A12g31000 | hypothetical protein predicted by cense expressed protein                            | 48   | 54   | 61   | 64   | 57   | 47   | 48   | 52   | 0.86     | 0.058411 | 36   | 35   | 38   | 42   | 38   | 36   | 38   | 35   | 38       | 46   | 0.87     | 0.039194 | 38       | 0.97     | 0.636302 |          |
| 267201_at   | A12g31010 | putative protein kinase contains a prote protein kinase family protein               | 43   | 47   | 56   | 51   | 60   | 42   | 49   | 52   | 0.91     | 0.771679 | 48   | 48   | 43   | 51   | 46   | 34   | 46   | 47   | 46       | 45   | 1.02     | 0.822495 | 44       | 1.05     | 0.720538 |          |
| 267202_s_at | A12g31030 | putative oxysterol-binding protein oxysterol-binding family protein /// oxyst        | 6    | 8    | 13   | 12   | 9    | 10   | 74   | 10   | 7.27     | 0.000864 | 25   | 26   | 29   | 8    | 6    | 5    | 9    | 7    | 27       | 7    | 3.82     | 0.000085 | 6        | 4.18     | 0.000219 |          |
| 267203_at   | A12g31035 | hypothetical protein predicted by cense oxysterol-binding family protein             | 7    | 6    | 11   | 7    | 10   | 3    | 8    | 7    | 1.18     | 0.657710 | 3    | 6    | 5    | 4    | 4    | 7    | 8    | 5    | 5        | 6    | 0.82     | 0.427928 | 5        | 0.92     | 0.750047 |          |
| 267204_at   | A12g31050 | putative blue copper-binding protein                                                 | 31   | 36   | 43   | 45   | 48   | 39   | 47   | 80   | 0.45     | 0.057926 | 28   | 28   | 48   | 31   | 28   | 34   | 21   | 21   | 27       | 39   | 1.21     | 0.279781 | 28       | 1.27     | 0.324998 |          |
| 267205_at   | A12g30820 | unknown protein                                                                      | 40   | 68   | 53   | 61   | 77   | 50   | 33   | 63   | 0.85     | 0.462975 | 33   | 35   | 32   | 42   | 33   | 32   | 29   | 28   | 33       | 33   | 1.01     | 0.930610 | 36       | 0.93     | 0.469046 |          |
| 267206_at   | A12g30830 | putative dioxygenase 2-oxoglutarate-dependent dioxygenase.                           | 39   | 45   | 54   | 56   | 55   | 51   | 46   | 54   | 0.85     | 0.131632 | 30   | 31   | 37   | 32   | 33   | 33   | 29   | 29   | 33       | 31   | 1.05     | 0.441499 | 33       | 1.01     | 0.922686 |          |
| 267207_at   | A12g30840 | putative dioxygenase 2-oxoglutarate-dependent dioxygenase.                           | 30   | 39   | 40   | 34   | 44   | 36   | 37   | 38   | 0.98     | 0.856239 | 20   | 27   | 28   | 29   | 25   | 24   | 36   | 27   | 26       | 28   | 0.88     | 0.359127 | 26       | 0.96     | 0.724652 |          |
| 267208_at   | A12g30980 | putative e-shaapz-like protein kinase dze e-shaapz-related protein kinase delta / AS | 502  | 577  | 581  | 691  | 741  | 695  | 555  | 675  | 0.82     | 0.056895 | 488  | 531  | 516  | 638  | 546  | 652  | 611  | 512  | 605      | 678  | 0.66     | 0.066255 | 670      | 0.61     | 0.035246 |          |
| 267209_at   | A12g30930 | unknown protein : supported by full-len expressed protein                            | 37   | 52   | 59   | 33   | 48   | 38   | 129  | 0.19 | 0.193168 | 35       | 37   | 37   | 33   | 32   | 30   | 42   | 31   | 36   | 34       | 1.08 | 0.365984 | 32       | 1.14     | 0.024242 |          |          |
| 267210_at   | A12g30920 | dihydroxymethylbenzoate methyltra hexaenonvldihydrobenzoate methyltra                | 120  | 158  | 188  | 223  | 237  | 193  | 155  | 218  | 0.71     | 0.057587 | 133  | 161  | 167  | 248  | 186  | 168  | 188  | 186  | 154      | 192  | 0.80     | 0.080670 | 198      | 0.78     | 0.140201 |          |
| 267151_at   | A12g30970 | aspartate aminotransferase (AAT1) like aspartate aminotransferase, mitochondr        | 466  | 507  | 542  | 706  | 707  | 618  | 505  | 677  | 0.75     | 0.009515 | 481  | 587  | 548  | 848  | 615  | 557  | 690  | 652  | 539      | 672  | 0.80     | 0.011779 | 673      | 0.80     | 0.225171 |          |
| 267152_at   | A12g31040 | hypothetical protein predicted by cense expressed protein I-related                  | 674  | 402  | 403  | 424  | 559  | 428  | 360  | 470  | 0.76     | 0.147000 | 453  | 598  | 498  | 582  | 582  | 542  | 583  | 595  | 583      | 595  | 0.87     | 0.051359 | 515      | 0.79     | 0.080706 |          |
| 267153_at   | A12g30980 | glutathione S-transferase identical to G glutathione S-transferase, putative         | 1521 | 1515 | 1608 | 1828 | 2098 | 1905 | 1814 | 1944 | 0.53     | 0.057444 | 1596 | 1447 | 1743 | 1453 | 1714 | 1780 | 1582 | 1626 | 1595     | 1630 | 0.88     | 0.745172 | 1487     | 0.77     | 0.249009 |          |
| 267154_at   | A12g30870 | glutathione S-transferase identical to G glutathione S-transferase, putative         | 647  | 603  | 805  | 946  | 1070 | 916  | 684  | 977  | 0.70     | 0.019123 | 647  | 608  | 587  | 1008 | 801  | 810  | 833  | 874  | 614      | 865  | 0.71     | 0.002946 | 873      | 0.70     | 0.020778 |          |
| 267155_at   | A12g30925 | CLE7, putative CLAVATA3/ESR-related hypothetical protein                             | 5    | 5    | 4    | 3    | 4    | 3    | 4    | 3    | 1.29     | 0.140724 | 6    | 3    | 4    | 6    | 7    | 5    | 8    | 5    | 4        | 6    | 0.75     | 0.154014 | 6        | 0.76     | 0.195278 |          |
| 267156_at   | A12g37610 | hypothetical protein predicted by cense hypothetical protein                         | 20   | 24   | 30   | 22   | 25   | 19   | 24   | 22   | 1.11     | 0.513648 | 23   | 23   | 20   | 22   | 13   | 15   | 18   | 15   | 22       | 17   | 1.33     | 0.040653 | 17       | 1.31     | 0.133109 |          |
| 267157_at   | A12g37630 | putative MYB family transcription factor myb family transcription factor (MYB91)     | 113  | 269  | 252  | 269  | 265  | 202  | 165  | 252  | 0.65     | 0.057926 | 154  | 140  | 173  | 152  | 205  | 199  | 173  | 152  | 199      | 173  | 0.75     | 0.039421 | 216      | 0.70     | 0.097667 |          |
| 267158_at   | A12g37640 | putative expansion, putative (EXP3)                                                  | 51   | 92   | 60   | 69   | 89   | 64   | 68   | 74   | 0.92     | 0.695570 | 2    |      |      |      |      |      |      |      |          |      |          |          |          |          |          |          |

|             |           |                                                                                      |                                                                  |      |      |      |      |      |      |      |          |          |          |      |      |      |      |      |      |      |      |      |      |          |          |      |          |          |
|-------------|-----------|--------------------------------------------------------------------------------------|------------------------------------------------------------------|------|------|------|------|------|------|------|----------|----------|----------|------|------|------|------|------|------|------|------|------|------|----------|----------|------|----------|----------|
| 267143_at   | A12g38100 | putative peptide/amino acid transporter                                              | proton-dependent oligopeptide transport                          | 35   | 39   | 48   | 47   | 46   | 42   | 41   | 45       | 0.91     | 0.385126 | 28   | 31   | 38   | 31   | 27   | 30   | 38   | 35   | 32   | 1.00 | 0.982794 | 29       | 1.10 | 0.445694 |          |
| 267144_at   | A12g38110 | unknown protein                                                                      | phospholipid:glycerol acyltransferase                            | 109  | 194  | 177  | 349  | 343  | 301  | 160  | 331      | 0.48     | 0.004757 | 233  | 243  | 241  | 549  | 373  | 313  | 326  | 340  | 239  | 380  | 0.63     | 0.050443 | 41   | 0.58     | 0.071776 |
| 267145_at   | A12g38130 | putative acetyltransferase                                                           | GCHN5-related N-acetyltransferase                                | 236  | 329  | 308  | 365  | 410  | 334  | 291  | 369      | 0.77     | 0.094726 | 407  | 416  | 408  | 564  | 480  | 484  | 484  | 484  | 494  | 0.83 | 0.013923 | 509      | 0.81 | 0.024034 |          |
| 267146_at   | A12g38160 | unknown protein                                                                      | unknown protein expressed by cDNA                                | 95   | 112  | 107  | 142  | 144  | 124  | 102  | 137      | 0.75     | 0.012065 | 88   | 94   | 111  | 100  | 136  | 116  | 113  | 106  | 116  | 0.76 | 0.158095 | 146      | 0.81 | 0.156055 |          |
| 267147_at   | A12g38240 | outative antihydroxanthin synthase                                                   | suco oxidoreductase, 2OG-Fe(II) oxovanemase I                    | 63   | 70   | 117  | 97   | 113  | 92   | 83   | 101      | 0.83     | 0.381225 | 57   | 53   | 62   | 70   | 54   | 61   | 73   | 65   | 57   | 64   | 0.89     | 0.185061 | 61   | 0.93     | 0.457214 |
| 267088_at   | A12g38140 | 30S ribosomal protein S31                                                            | supported chloroplast 30S ribosomal protein S31 (f               | 270  | 412  | 339  | 362  | 461  | 323  | 340  | 382      | 0.89     | 0.510784 | 326  | 385  | 334  | 495  | 387  | 383  | 397  | 385  | 348  | 409  | 0.85     | 0.010533 | 422  | 0.83     | 0.148390 |
| 267089_at   | A12g38300 | unknown protein                                                                      | myb family transcription factor                                  | 17   | 22   | 29   | 26   | 29   | 26   | 23   | 27       | 0.84     | 0.339695 | 43   | 43   | 20   | 19   | 24   | 20   | 22   | 22   | 20   | 22   | 0.91     | 0.142426 | 22   | 0.89     | 0.159395 |
| 267090_at   | A12g38270 | unknown protein                                                                      | supported by full-length CAX-inhibitor protein                   | 42   | 57   | 67   | 67   | 68   | 54   | 61   | 67       | 0.96     | 0.339695 | 43   | 43   | 51   | 63   | 49   | 42   | 53   | 43   | 51   | 51   | 0.705322 | 42       | 1.21 | 0.207553 |          |
| 267091_at   | A12g38185 | Expressed protein                                                                    | supported by full-length zinc finger (C3HC4-type RING finger) fa | 44   | 54   | 60   | 57   | 61   | 55   | 53   | 58       | 0.91     | 0.360840 | 56   | 58   | 63   | 73   | 55   | 58   | 58   | 56   | 59   | 60   | 0.98     | 0.824803 | 62   | 0.95     | 0.651363 |
| 267092_at   | A12g38120 | unknown protein                                                                      | supported by full-length amino acid permease, putative (AUX1)    | 593  | 730  | 729  | 710  | 851  | 580  | 684  | 714      | 0.96     | 0.756924 | 367  | 333  | 360  | 513  | 407  | 379  | 432  | 421  | 353  | 430  | 0.82     | 0.047025 | 433  | 0.82     | 0.131419 |
| 267093_at   | A12g38170 | high affinity Ca2+ antiporter identical to calcium exchanger (CAX1)                  |                                                                  | 248  | 298  | 456  | 350  | 335  | 271  | 334  | 319      | 1.05     | 0.834728 | 773  | 912  | 790  | 1000 | 692  | 703  | 935  | 936  | 825  | 853  | 0.97     | 0.769185 | 708  | 1.03     | 0.820225 |
| 267094_at   | A12g38080 | outative diolhenol oxidase                                                           | supported by laccase, outative / diolhenol oxidase, out          | 147  | 50   | 63   | 90   | 62   | 46   | 72   | 65       | 0.85     | 0.015456 | 31   | 27   | 29   | 39   | 34   | 23   | 30   | 29   | 29   | 31   | 0.94     | 0.618183 | 32   | 0.90     | 0.561253 |
| 267095_at   | A12g38280 | putative AMP deaminase                                                               | supported by AMP deaminase, putative / myoadenylate              | 644  | 785  | 831  | 837  | 934  | 705  | 747  | 925      | 0.90     | 0.414407 | 620  | 550  | 575  | 761  | 696  | 574  | 812  | 750  | 882  | 719  | 0.81     | 0.059866 | 677  | 0.86     | 0.179801 |
| 267096_at   | A12g38180 | unknown protein                                                                      | supported by cDNA: GDSL-motif lipase/hydrolase family prot       | 134  | 182  | 170  | 229  | 289  | 206  | 162  | 242      | 0.67     | 0.050304 | 220  | 295  | 232  | 383  | 312  | 264  | 301  | 293  | 249  | 311  | 0.80     | 0.097317 | 320  | 0.78     | 0.166412 |
| 267097_at   | A12g14440 | unknown protein                                                                      | predicted by gscan expressed protein                             | 28   | 34   | 41   | 36   | 33   | 35   | 36   | 0.96     | 0.774475 | 28       | 35   | 39   | 26   | 17   | 22   | 34   | 26   | 34   | 25   | 1.38 | 0.068811 | 22       | 1.59 | 0.031594 |          |
| 267098_at   | A12g14500 | hyothetical protein predicted by gscan                                               | GCHN5-related N-acetyltransferase (GNA                           | 22   | 21   | 27   | 13   | 15   | 23   | 14   | 170      | 0.007246 | 29       | 31   | 31   | 10   | 9    | 10   | 12   | 9    | 30   | 10   | 3.05 | 0.000001 | 10       | 3.18 | 0.000019 |          |
| 267099_at   | A12g14600 | DNA-acacritic or azwimindic site) lysa acurinic endonuclease-redox protein / D       |                                                                  | 207  | 273  | 507  | 300  | 304  | 251  | 282  | 285      | 0.92     | 0.550776 | 212  | 182  | 219  | 300  | 238  | 213  | 260  | 242  | 204  | 251  | 0.81     | 0.060852 | 250  | 0.82     | 0.179175 |
| 267100_at   | A12g14470 | unknown protein                                                                      | EMGNY-specific protein-related                                   | 29   | 36   | 33   | 31   | 38   | 34   | 33   | 35       | 0.94     | 0.558207 | 27   | 25   | 26   | 31   | 23   | 27   | 31   | 25   | 26   | 27   | 0.95     | 0.548919 | 27   | 0.96     | 0.703381 |
| 267101_at   | A12g14480 | putative peroxidase                                                                  | peroxidase, putative                                             | 27   | 31   | 35   | 39   | 42   | 41   | 31   | 41       | 0.76     | 0.015218 | 23   | 24   | 31   | 30   | 30   | 22   | 27   | 24   | 26   | 27   | 0.97     | 0.816120 | 27   | 0.95     | 0.716419 |
| 267102_at   | A12g15000 | putative small nuclear ribonucleoprotein WD-40 repeat family protein / small nucl    |                                                                  | 283  | 383  | 434  | 360  | 394  | 321  | 367  | 358      | 1.02     | 0.865543 | 323  | 340  | 355  | 403  | 383  | 398  | 396  | 383  | 339  | 375  | 0.90     | 0.186144 | 365  | 0.93     | 0.447402 |
| 267103_at   | A12g14900 | putative UDP-N-acetylglucosamine-6-UDP-GlcNAc:diolchilol phosphate N-acet            |                                                                  | 104  | 116  | 121  | 124  | 141  | 111  | 114  | 125      | 0.91     | 0.314407 | 112  | 107  | 107  | 139  | 127  | 109  | 133  | 119  | 124  | 0.88 | 0.093630 | 125      | 0.87 | 0.146309 |          |
| 267104_at   | A12g14300 | ERD15 protein identical to GB D30719: dehydration-induced protein (ERD15)            |                                                                  | 2287 | 2621 | 3057 | 3112 | 3445 | 2599 | 2655 | 3052     | 0.87     | 0.297938 | 2128 | 2192 | 1923 | 2755 | 2245 | 2144 | 2731 | 2650 | 2081 | 2505 | 0.83     | 0.058675 | 2381 | 0.87     | 0.218648 |
| 267105_at   | A12g14760 | hyothetical protein predicted by gscan basic helix-loop-helix protein / bHLH pro     |                                                                  | 20   | 25   | 20   | 22   | 25   | 22   | 1.15 | 0.426332 | 19       | 19       | 21   | 16   | 22   | 17   | 22   | 19   | 20   | 19   | 20   | 1.01 | 0.948368 | 19       | 1.06 | 0.644888 |          |
| 267106_s_at | A12g14740 | outative vacuolar sortino receptor ident vacuolar sortino receptor, outative /// vac |                                                                  | 591  | 788  | 789  | 950  | 977  | 747  | 723  | 891      | 0.81     | 0.160835 | 746  | 664  | 732  | 978  | 818  | 734  | 960  | 900  | 714  | 878  | 0.81     | 0.041707 | 843  | 0.85     | 0.163891 |
| 267107_at   | A12g14730 | hyothetical protein predicted by gscan                                               | hyothetical protein                                              | 42   | 40   | 38   | 41   | 49   | 42   | 37   | 44       | 0.83     | 0.103272 | 37   | 31   | 40   | 29   | 33   | 34   | 31   | 32   | 36   | 32   | 1.13     | 0.076699 | 32   | 1.12     | 0.262211 |
| 267108_at   | A12g14830 | hyothetical protein predicted by gscan                                               | expressed protein                                                | 20   | 33   | 29   | 34   | 41   | 28   | 35   | 0.82     | 0.340554 | 35       | 27   | 37   | 42   | 29   | 32   | 36   | 38   | 33   | 35   | 0.93 | 0.553258 | 34       | 0.96 | 0.812581 |          |
| 267109_at   | A12g14810 | hyothetical protein predicted by gscan                                               | hyothetical protein                                              | 12   | 9    | 4    | 10   | 7    | 8    | 8    | 0.99     | 0.979213 | 10       | 10   | 12   | 11   | 12   | 12   | 9    | 7    | 11   | 10   | 1.04 | 0.782112 | 12       | 0.91 | 0.196049 |          |
| 267110_at   | A12g14800 | hyothetical protein predicted by gscan                                               | hyothetical protein                                              | 31   | 41   | 41   | 39   | 44   | 32   | 38   | 38       | 0.98     | 0.890463 | 31   | 30   | 37   | 43   | 33   | 33   | 35   | 32   | 33   | 35   | 0.93     | 0.430612 | 36   | 0.90     | 0.382563 |
| 267111_s_at | A12g14770 | hyothetical protein predicted by gscan                                               | hyothetical protein /// osudosome, hvo                           | 37   | 47   | 59   | 51   | 56   | 48   | 48   | 52       | 0.92     | 0.574998 | 29   | 38   | 38   | 31   | 32   | 29   | 32   | 34   | 35   | 32   | 1.11     | 0.222878 | 31   | 1.14     | 0.242765 |
| 267112_at   | A12g14750 | hyothetical protein predicted by gscan                                               | zinc finger adenylyl sulfate kinase 1 (AKN1)                     | 198  | 277  | 269  | 317  | 282  | 234  | 283  | 239      | 0.78     | 0.045459 | 328  | 295  | 328  | 295  | 328  | 295  | 328  | 295  | 287  | 328  | 0.77     | 0.025122 | 305  | 0.75     | 0.025814 |
| 267113_at   | A12g14850 | hyothetical protein predicted by gscan                                               | expressed protein                                                | 148  | 182  | 221  | 201  | 226  | 196  | 184  | 208      | 0.88     | 0.360024 | 199  | 208  | 210  | 308  | 217  | 209  | 240  | 220  | 206  | 239  | 0.86     | 0.217856 | 245  | 0.84     | 0.289208 |
| 267114_at   | A12g14835 | Expressed protein                                                                    | supported by full-length zinc finger (C3HC4-type RING finger) fa | 315  | 402  | 393  | 474  | 334  | 372  | 370  | 460      | 0.80     | 0.176565 | 405  | 396  | 404  | 643  | 458  | 458  | 528  | 478  | 402  | 513  | 0.78     | 0.053232 | 520  | 0.77     | 0.127162 |
| 267115_s_at | A12g32540 | putative cellulose synthase                                                          | cellulose synthase family protein / cellu                        | 18   | 33   | 30   | 23   | 26   | 27   | 1.01 | 0.847649 | 16       | 16       | 20   | 21   | 16   | 16   | 16   | 22   | 19   | 17   | 19   | 0.92 | 0.471376 | 18       | 0.98 | 0.857723 |          |
| 267116_at   | A12g35600 | unknown protein                                                                      | F-box family protein                                             | 62   | 58   | 59   | 83   | 87   | 70   | 60   | 80       | 0.74     | 0.016366 | 65   | 62   | 75   | 99   | 81   | 72   | 68   | 67   | 67   | 78   | 0.86     | 0.258561 | 84   | 0.80     | 0.327388 |
| 267117_at   | A12g32570 | unknown protein                                                                      | F-box family protein                                             | 4    | 2    | 1    | 6    | 3    | 5    | 3    | 5        | 0.58     | 0.221276 | 2    | 3    | 4    | 4    | 3    | 3    | 3    | 3    | 3    | 3    | 0.84     | 0.425330 | 3    | 0.89     | 0.657887 |
| 267118_at   | A12g32590 | hyothetical protein                                                                  | barren family protein                                            | 216  | 274  | 247  | 276  | 310  | 246  | 246  | 278      | 0.89     | 0.275296 | 214  | 171  | 237  | 263  | 223  | 191  | 261  | 247  | 207  | 237  | 0.88     | 0.245346 | 226  | 0.92     | 0.556220 |
| 267119_at   | A12g32610 | putative cellulose synthase                                                          | cellulose synthase family protein                                | 36   | 40   | 48   | 41   | 50   | 46   | 41   | 46       | 0.91     | 0.404359 | 22   | 22   | 29   | 28   | 22   | 24   | 27   | 26   | 24   | 26   | 0.95     | 0.548346 | 25   | 0.97     | 0.837258 |
| 267120_at   | A12g32620 | putative cellulose synthase                                                          | cellulose synthase family protein                                | 31   | 34   | 39   | 35   | 39   | 34   | 38   | 34       | 0.98     | 0.275296 | 25   | 24   | 29   | 28   | 23   | 25   | 27   | 26   | 25   | 27   | 0.92     | 0.548346 | 25   | 0.97     | 0.837258 |
| 267126_at   | A12g32630 | putative salt-inducible protein                                                      | pentatricopeptide (PPR) repeat-containin                         | 42   | 54   | 53   | 59   | 61   | 46   | 50   | 55       | 0.90     | 0.398086 | 38   | 34   | 46   | 50   | 44   | 45   | 47   | 43   | 39   | 45   | 0.87     | 0.089699 | 46   | 0.86     | 0.162770 |
| 267127_at   | A12g32460 | outative MYB family transcription factor mvb family transcription factor (MYB101     |                                                                  | 39   | 40   | 47   | 43   | 53   | 43   | 42   | 46       | 0.90     | 0.354072 | 37   | 44   | 37   | 64   | 38   | 43   | 64   | 52   | 39   | 52   | 0.75     | 0.124373 | 48   | 0.81     | 0.336739 |
| 267096_at   | A12g32470 | hyothetical protein predicted by gscan                                               | hyothetical protein predicted by gscan                           | 14   | 13   | 21   | 17   | 21   | 19   | 16   | 19       | 0.84     | 0.296710 | 10   | 12   | 13   | 15   | 16   | 12   | 9    | 8    | 12   | 12   | 0.98     | 0.924532 | 14   | 0.84     | 0.231699 |
| 267057_at   | A12g32500 | hyothetical protein predicted by gscan                                               | hyothetical protein                                              | 155  | 221  | 183  | 200  | 243  | 204  | 186  | 216      | 0.86     | 0.206952 | 252  | 241  | 256  | 369  | 315  | 270  | 307  | 288  | 250  | 310  | 0.51     | 0.036925 | 315  | 0.79     | 0.755455 |
| 267058_at   | A12g32510 | outative protein kinase contains a prote                                             | protein kinase-related                                           | 68   | 107  | 103  | 120  | 96   | 87   | 106  | 82       | 0.10     | 0.218607 | 56   | 47   | 67   | 50   | 62   | 58   | 73   | 69   | 68   | 79   | 0.79     | 0.032902 | 78   | 0.85     | 0.070598 |
| 267059_at   | A12g32520 | putative carboxymethylglutaminyl deacetylase                                         | dieneolase hydrolase family protein                              | 246  | 395  | 365  | 454  | 512  | 379  | 345  | 488      | 0.77     | 0.177532 | 412  | 486  | 407  | 684  | 498  | 518  | 511  | 493  | 435  | 541  | 0.80     | 0.085918 | 567  | 0.77     | 0.109952 |
| 267060_at   | A12g32580 | unknown protein                                                                      | supported by full-length expressed protein                       | 226  | 221  | 234  | 325  | 315  | 290  | 334  | 310      | 0.76     | 0.005985 | 298  | 318  | 360  | 485  | 373  | 349  | 298  | 331  | 325  | 367  | 0.89     | 0.384614 | 402  | 0.81     | 0.168149 |
| 267061_at   | A12g32480 | unknown protein                                                                      | supported by full-length membrane-associated zinc metalloprote   | 241  | 350  | 350  | 350  | 358  | 261  | 214  | 323      | 0.97     | 0.853329 | 322  | 317  | 329  | 466  | 381  | 363  | 445  | 430  | 323  | 417  | 0.77     | 0.010679 | 403  | 0.80     | 0.063189 |
| 267062_at   | A12g32500 | outative silicochrome associated protein hydroxylase-like glycochrome family c       |                                                                  | 207  | 240  | 245  | 256  | 317  | 229  | 217  | 289      | 0.78     | 0.045459 | 328  | 353  | 366  | 374  | 322  | 292  | 358  | 317  | 289  | 338  | 0.82     | 0.021501 | 328  | 0.81     | 0.386057 |
| 267063_at   | A12g14120 | hyothetical protein predicted by gscan                                               | expressed protein                                                | 26   | 2    |      |      |      |      |      |          |          |          |      |      |      |      |      |      |      |      |      |      |          |          |      |          |          |







|             |           |                                                                      |                                                 |      |      |      |      |      |      |      |      |          |          |     |      |      |      |      |      |      |      |      |      |          |          |          |          |          |          |
|-------------|-----------|----------------------------------------------------------------------|-------------------------------------------------|------|------|------|------|------|------|------|------|----------|----------|-----|------|------|------|------|------|------|------|------|------|----------|----------|----------|----------|----------|----------|
| 266711_at   | A12g46740 | unknown protein                                                      | FAD-binding domain-containing protein           | 16   | 13   | 18   | 15   | 19   | 21   | 16   | 18   | 0.86     | 0.327511 | 14  | 14   | 19   | 17   | 13   | 11   | 17   | 19   | 15   | 16   | 1.00     | 0.975334 | 14       | 1.10     | 0.587165 |          |
| 266712_at   | A12g46750 | unknown protein                                                      | FAD-binding domain-containing protein           | 24   | 30   | 35   | 33   | 35   | 39   | 29   | 36   | 0.83     | 0.169942 | 25  | 29   | 31   | 22   | 22   | 27   | 22   | 28   | 28   | 24   | 24       | 1.17     | 0.130153 | 24       | 1.18     | 0.170043 |
| 266713_at   | A12g46760 | unknown protein                                                      | FAD-binding domain-containing protein           | 20   | 27   | 24   | 29   | 30   | 26   | 24   | 28   | 0.84     | 0.123760 | 20  | 23   | 26   | 25   | 23   | 18   | 26   | 26   | 23   | 24   | 0.97     | 0.735897 | 22       | 1.03     | 0.811520 |          |
| 266714_at   | A12g46770 | putative RNA-binding protein                                         | NAM (no apical meristem)-like protein           | 15   | 15   | 21   | 20   | 21   | 15   | 20   | 0.53 | 0.547601 | 22       | 22  | 18   | 21   | 21   | 18   | 15   | 17   | 18   | 21   | 15   | 1.14     | 0.204922 | 14       | 1.18     | 0.204922 |          |
| 266715_at   | A12g46780 | putative RNA-binding protein                                         | RNA recognition motif (RRM)-containing          | 63   | 61   | 72   | 82   | 85   | 59   | 65   | 75   | 0.87     | 0.320400 | 62  | 65   | 66   | 70   | 64   | 62   | 69   | 54   | 64   | 64   | 1.01     | 0.879244 | 65       | 0.98     | 0.716383 |          |
| 266716_at   | A12g46820 | unknown protein ; supported by full-length expressed protein         |                                                 | 371  | 723  | 626  | 609  | 689  | 529  | 573  | 609  | 0.94     | 0.773467 | 497 | 564  | 601  | 809  | 609  | 602  | 560  | 541  | 554  | 624  | 0.89     | 0.340636 | 673      | 0.82     | 0.185788 |          |
| 266717_at   | A12g46735 | Expressed protein ; supported by full-length expressed protein       |                                                 | 31   | 81   | 73   | 103  | 146  | 83   | 72   | 110  | 0.65     | 0.117282 | 66  | 70   | 81   | 111  | 78   | 68   | 74   | 69   | 72   | 80   | 0.90     | 0.507697 | 86       | 0.84     | 0.383996 |          |
| 266718_at   | A12g46800 | putative zinc transporter ; supported by zinc transporter (ZAT)      |                                                 | 643  | 819  | 843  | 879  | 829  | 769  | 817  | 943  | 0.87     | 0.167619 | 710 | 808  | 868  | 778  | 928  | 825  | 870  | 827  | 868  | 925  | 0.82     | 0.085385 | 948      | 0.93     | 0.148646 |          |
| 266719_at   | A12g46830 | MYB-related transcription factor /CCA1                               | myb-related transcription factor (CCA1)         | 54   | 112  | 191  | 54   | 51   | 47   | 119  | 51   | 2.35     | 0.161485 | 20  | 23   | 41   | 74   | 60   | 20   | 24   | 20   | 28   | 40   | 0.72     | 0.506273 | 51       | 0.55     | 0.264053 |          |
| 266720_s_at | A12g46790 | hyothetical protein predicted by oenef                               | osmo-ressponse regulator 9 (APRR9) /            | 34   | 46   | 64   | 40   | 39   | 39   | 48   | 39   | 1.22     | 0.380723 | 30  | 25   | 35   | 45   | 33   | 31   | 46   | 36   | 30   | 38   | 0.80     | 0.148891 | 36       | 0.84     | 0.340480 |          |
| 266721_at   | A12g03220 | unknown protein                                                      | calactoside 2-alpha-L-fucosyltransferase        | 229  | 233  | 250  | 296  | 353  | 284  | 321  | 311  | 0.74     | 0.031402 | 218 | 213  | 236  | 311  | 201  | 232  | 319  | 285  | 222  | 290  | 0.77     | 0.019340 | 281      | 0.79     | 0.083698 |          |
| 266722_at   | A12g03210 | unknown protein                                                      | xylooligosaccharyltransferase, putative f       | 126  | 151  | 161  | 157  | 161  | 121  | 146  | 146  | 1.00     | 0.888261 | 138 | 133  | 157  | 157  | 150  | 121  | 127  | 134  | 137  | 104  | 0.590766 | 143      | 1.00     | 0.978318 |          |          |
| 266723_at   | A12g03180 | putative similar to                                                  | E3 ubiquitin ligase SCF complex subunit         | 34   | 41   | 47   | 26   | 24   | 19   | 41   | 23   | 1.76     | 0.016195 | 19  | 18   | 19   | 16   | 11   | 15   | 20   | 17   | 18   | 16   | 1.17     | 0.229117 | 14       | 1.34     | 0.042273 |          |
| 266724_at   | A12g03180 | hyothetical protein predicted by oenec                               | hyothetical protein                             | 14   | 16   | 14   | 13   | 20   | 16   | 15   | 17   | 0.88     | 0.386612 | 15  | 15   | 16   | 13   | 14   | 12   | 18   | 14   | 16   | 14   | 1.10     | 0.333661 | 13       | 1.20     | 0.039839 |          |
| 266725_at   | A12g03170 | SKP1/ASK1 (A14), putative similar to                                 | E3 ubiquitin ligase SCF complex subunit         | 23   | 30   | 35   | 28   | 33   | 26   | 29   | 29   | 1.02     | 0.918778 | 19  | 25   | 26   | 25   | 22   | 21   | 27   | 22   | 24   | 24   | 1.00     | 0.972857 | 23       | 1.03     | 0.772816 |          |
| 266726_at   | A12g03160 | SKP1/ASK1 (A19), putative similar to                                 | E3 ubiquitin ligase SCF complex subunit         | 18   | 20   | 24   | 24   | 29   | 32   | 20   | 28   | 0.72     | 0.064082 | 15  | 22   | 16   | 19   | 17   | 17   | 16   | 16   | 18   | 17   | 1.06     | 0.587875 | 18       | 1.01     | 0.944290 |          |
| 266727_at   | A12g03150 | putative calmodulin                                                  | ATP/GTP-binding protein family                  | 242  | 316  | 311  | 317  | 343  | 278  | 260  | 313  | 0.53     | 0.496673 | 241 | 203  | 263  | 309  | 254  | 197  | 257  | 246  | 236  | 253  | 0.93     | 0.555975 | 253      | 0.93     | 0.660153 |          |
| 266728_at   | A12g03140 | similar to late embryogenesis abundant                               | CAAX amino terminal protease family or          | 140  | 203  | 203  | 236  | 243  | 227  | 182  | 235  | 0.77     | 0.067894 | 131 | 129  | 141  | 213  | 155  | 138  | 159  | 153  | 134  | 164  | 0.82     | 0.136597 | 169      | 0.79     | 0.205262 |          |
| 266729_at   | A12g03130 | 50S ribosomal protein L7/L12                                         | ribosomal protein L12 family protein            | 17   | 15   | 30   | 23   | 27   | 19   | 20   | 23   | 0.90     | 0.673048 | 13  | 16   | 15   | 14   | 13   | 12   | 15   | 13   | 15   | 14   | 1.07     | 0.315485 | 13       | 1.11     | 0.233267 |          |
| 266730_at   | A12g03110 | putative RNA-binding protein                                         | KH domain-containing protein                    | 39   | 47   | 65   | 64   | 66   | 59   | 50   | 63   | 0.80     | 0.182793 | 41  | 46   | 51   | 42   | 41   | 44   | 51   | 47   | 46   | 45   | 1.02     | 0.808959 | 42       | 1.08     | 0.315475 |          |
| 266731_at   | A12g03260 | unknown protein                                                      | EXS family protein / ERD1/XPR1/SYG1             | 59   | 76   | 88   | 79   | 97   | 78   | 75   | 84   | 0.88     | 0.202058 | 45  | 48   | 61   | 59   | 56   | 63   | 63   | 60   | 51   | 60   | 0.86     | 0.076669 | 59       | 0.87     | 0.216845 |          |
| 266732_at   | A12g03240 | unknown protein                                                      | EXS family protein / ERD1/XPR1/SYG1             | 410  | 483  | 540  | 577  | 624  | 484  | 478  | 562  | 0.85     | 0.205407 | 419 | 353  | 388  | 579  | 460  | 416  | 512  | 492  | 387  | 492  | 0.79     | 0.035317 | 485      | 0.80     | 0.133434 |          |
| 266733_at   | A12g03280 | similar to ax1                                                       | protein from Nicotiana glauca expressed protein | 190  | 286  | 220  | 260  | 307  | 230  | 232  | 265  | 0.87     | 0.005513 | 250 | 231  | 265  | 325  | 304  | 258  | 279  | 262  | 249  | 285  | 0.87     | 0.094063 | 260      | 0.84     | 0.101889 |          |
| 266734_at   | A12g03320 | hyothetical protein predicted by oenec                               | hyothetical protein                             | 82   | 102  | 109  | 31   | 25   | 26   | 97   | 28   | 3.53     | 0.001116 | 46  | 40   | 55   | 20   | 15   | 16   | 14   | 19   | 47   | 17   | 2.84     | 0.000175 | 17       | 2.82     | 0.003381 |          |
| 266735_at   | A12g03310 | hyothetical protein predicted by oenec                               | expressed protein                               | 45   | 59   | 67   | 65   | 77   | 59   | 57   | 67   | 0.86     | 0.320409 | 39  | 40   | 38   | 40   | 37   | 43   | 40   | 44   | 39   | 41   | 0.95     | 0.287700 | 40       | 0.97     | 0.557280 |          |
| 266736_at   | A12g03200 | putative chloroplast nucleoid DNA bindi                              | aspartyl protease family protein                | 23   | 29   | 32   | 25   | 26   | 25   | 28   | 25   | 1.10     | 0.360708 | 22  | 17   | 28   | 23   | 17   | 21   | 26   | 23   | 23   | 22   | 1.03     | 0.855087 | 20       | 1.11     | 0.556328 |          |
| 266737_at   | A12g03120 | unknown protein ; supported by full-length signal peptide            | peptidase family protein                        | 1015 | 1070 | 1310 | 1371 | 1395 | 1165 | 1132 | 1310 | 0.86     | 0.206661 | 997 | 1081 | 1068 | 1371 | 1063 | 1003 | 1064 | 1006 | 1049 | 1102 | 0.95     | 0.591493 | 1146     | 0.92     | 0.453098 |          |
| 266738_at   | A12g03270 | putative helicase ; supported by cDNA: DNA-binding protein, putative |                                                 | 126  | 267  | 310  | 293  | 303  | 240  | 268  | 279  | 0.96     | 0.741621 | 212 | 208  | 238  | 278  | 248  | 217  | 225  | 231  | 219  | 240  | 0.91     | 0.244567 | 248      | 0.89     | 0.226133 |          |
| 266739_s_at | A12g19850 | hyothetical protein predicted by oenec                               | ovule family protein                            | 37   | 37   | 49   | 43   | 48   | 48   | 39   | 47   | 0.83     | 0.243046 | 31  | 39   | 43   | 38   | 28   | 28   | 25   | 26   | 37   | 29   | 1.30     | 0.072817 | 31       | 1.21     | 0.256070 |          |
| 266740_at   | A12g19840 | putative RNA-binding protein                                         | copa-like retroelement pol polyprotein          | 10   | 10   | 10   | 10   | 10   | 10   | 10   | 10   | 0.99     | 0.000000 | 6   | 6    | 7    | 7    | 7    | 7    | 7    | 7    | 7    | 7    | 1.04     | 0.736541 | 9        | 1.00     | 0.981428 |          |
| 266741_at   | A12g19780 | putative disease resistance protein                                  | leucine-rich repeat family protein / exten      | 37   | 84   | 90   | 142  | 126  | 114  | 84   | 127  | 0.66     | 0.007321 | 61  | 59   | 72   | 104  | 99   | 79   | 104  | 100  | 64   | 97   | 0.66     | 0.003290 | 94       | 0.68     | 0.027835 |          |
| 266742_at   | A12g19950 | hyothetical protein predicted by oenec                               | expressed protein                               | 136  | 153  | 157  | 155  | 186  | 155  | 149  | 165  | 0.90     | 0.254757 | 114 | 110  | 138  | 164  | 153  | 114  | 162  | 146  | 121  | 148  | 0.82     | 0.089851 | 144      | 0.84     | 0.267828 |          |
| 266743_at   | A12g19720 | 40S ribosomal protein S15A                                           | 40S ribosomal protein S15A (RPS15AB)            | 300  | 347  | 343  | 419  | 478  | 344  | 330  | 413  | 0.80     | 0.115717 | 328 | 272  | 328  | 447  | 370  | 349  | 382  | 349  | 309  | 380  | 0.82     | 0.044391 | 389      | 0.80     | 0.087394 |          |
| 266744_at   | A12g19710 | hyothetical protein                                                  | expressed protein                               | 108  | 117  | 129  | 137  | 104  | 123  | 84   | 123  | 0.84     | 0.024959 | 63  | 46   | 66   | 69   | 61   | 61   | 64   | 58   | 66   | 68   | 0.84     | 0.093007 | 67       | 1.00     | 0.960728 |          |
| 266745_at   | A12g19700 | hyothetical protein                                                  | expressed protein                               | 16   | 20   | 24   | 20   | 19   | 20   | 20   | 1.00 | 0.972305 | 14       | 11  | 16   | 16   | 13   | 17   | 15   | 19   | 14   | 16   | 18   | 0.85     | 0.177904 | 15       | 0.89     | 0.385676 |          |
| 266746_at   | A12g19670 | putative arginine N-methyltransferase                                | protein arginine N-methyltransferase, ou        | 347  | 336  | 350  | 458  | 465  | 401  | 344  | 442  | 0.78     | 0.009304 | 391 | 376  | 477  | 592  | 557  | 447  | 436  | 410  | 414  | 488  | 0.85     | 0.215020 | 532      | 0.78     | 0.094292 |          |
| 266747_at   | A12g19660 | hyothetical protein                                                  | DC1 domain-containing protein                   | 39   | 42   | 49   | 50   | 59   | 42   | 43   | 50   | 0.86     | 0.274759 | 19  | 21   | 23   | 27   | 21   | 18   | 24   | 19   | 21   | 22   | 0.96     | 0.706158 | 22       | 0.95     | 0.746699 |          |
| 266748_at   | A12g19650 | hyothetical protein predicted by oenec                               | RNA-dependent RNA polymerase family             | 56   | 68   | 85   | 78   | 85   | 56   | 68   | 85   | 0.86     | 0.017286 | 63  | 46   | 66   | 69   | 66   | 61   | 68   | 64   | 58   | 66   | 0.87     | 0.076206 | 65       | 0.86     | 0.240550 |          |
| 266749_at   | A12g19600 | malate oxidoreductase (malic enzyme)                                 | Malate oxidoreductase, putative                 | 33   | 42   | 58   | 103  | 46   | 48   | 44   | 66   | 0.67     | 0.324085 | 30  | 34   | 36   | 33   | 33   | 33   | 40   | 36   | 33   | 33   | 0.96     | 0.490227 | 33       | 1.01     | 0.859567 |          |
| 266750_at   | A12g19890 | hyothetical protein predicted by oenec                               | expressed protein                               | 29   | 31   | 37   | 37   | 34   | 32   | 32   | 32   | 0.94     | 0.528286 | 26  | 20   | 31   | 25   | 23   | 24   | 24   | 24   | 20   | 24   | 23       | 1.03     | 0.786972 | 22       | 1.00     | 0.996152 |
| 266751_at   | A12g19960 | Ac-like transposase related to Ac Ds tr                              | hAT dimerisation domain-containing or           | 12   | 11   | 14   | 17   | 17   | 16   | 12   | 16   | 0.74     | 0.007315 | 7   | 12   | 13   | 11   | 10   | 14   | 14   | 11   | 11   | 12   | 0.91     | 0.551535 | 12       | 0.93     | 0.715185 |          |
| 266752_at   | A12g19800 | unknown protein predicted by oenec                                   | expressed protein                               | 617  | 642  | 1026 | 331  | 419  | 307  | 784  | 352  | 2.23     | 0.052912 | 271 | 321  | 224  | 262  | 319  | 286  | 247  | 236  | 272  | 270  | 0.91     | 0.836327 | 289      | 0.94     | 0.632514 |          |
| 266753_at   | A12g19790 | putative clathrin assembly protein ; sup                             | clathrin adaptor complex small chain fan        | 612  | 758  | 869  | 810  | 845  | 743  | 761  | 800  | 0.85     | 0.061158 | 764 | 948  | 846  | 927  | 846  | 865  | 934  | 862  | 886  | 926  | 0.96     | 0.689105 | 978      | 0.91     | 0.477558 |          |
| 266754_at   | A12g19810 | putative CCHC-Hype zinc finger protein                               | zinc finger (CCHC-Hype) family protein          | 266  | 465  | 225  | 237  | 194  | 322  | 219  | 147  | 0.47     | 0.265395 | 229 | 207  | 221  | 214  | 192  | 213  | 198  | 184  | 219  | 200  | 1.09     | 0.086179 | 207      | 1.06     | 0.263202 |          |
| 266755_at   | A12g19880 | putative RNA-binding protein                                         | mitochondrial ATP synthase q subunit fa         | 252  | 309  | 334  | 358  | 385  | 325  | 299  | 356  | 0.84     | 0.127045 | 284 | 336  | 335  | 457  | 346  | 346  | 332  | 346  | 318  | 365  | 0.87     | 0.207360 | 378      | 0.84     | 0.238014 |          |
| 266756_at   | A12g19770 | retroelement                                                         | retroelement                                    | 32   | 39   | 45   | 33   | 41   | 38   | 37   | 37   | 0.99     | 0.947606 | 24  | 27   | 30   | 27   | 25   | 26   | 31   | 27   | 27   | 27   | 0.98     | 0.832524 | 26       | 1.03     | 0.643667 |          |
| 266757_at   | A12g19830 | copa-like retroelement pol polyprotein                               | SNF7 family protein                             | 366  | 453  | 432  | 418  | 586  | 418  | 362  | 457  | 0.87     | 0.024959 | 482 | 420  | 429  | 476  | 421  | 436  | 424  | 416  | 434  | 465  | 0.94     | 0.734974 | 465      | 0.93     | 0.418394 |          |
| 266758_at   | A12g19730 | putative ribosomal protein L28                                       | sucoo 60S ribosomal protein L28 (RPL28A)        | 2429 | 28   |      |      |      |      |      |      |          |          |     |      |      |      |      |      |      |      |      |      |          |          |          |          |          |          |

















|             |           |                                                                                  |      |      |      |      |      |      |      |      |          |          |          |      |      |      |      |      |      |      |      |      |          |          |          |          |          |          |
|-------------|-----------|----------------------------------------------------------------------------------|------|------|------|------|------|------|------|------|----------|----------|----------|------|------|------|------|------|------|------|------|------|----------|----------|----------|----------|----------|----------|
| 265827_at   | At2g42400 | hypothetical protein predicted by geneF expressed-protein                        | 125  | 177  | 191  | 176  | 203  | 157  | 164  | 179  | 90       | 0.62     | 0.579358 | 127  | 128  | 135  | 175  | 149  | 137  | 140  | 147  | 130  | 149      | 0.87     | 0.077701 | 154      | 0.85     | 0.107576 |
| 265828_at   | At2g14520 | hypothetical protein predicted by census CBS domain-containing protein           | 43   | 59   | 63   | 103  | 92   | 76   | 55   | 90   | 0.61     | 0.025497 | 39       | 40   | 49   | 79   | 59   | 52   | 54   | 58   | 43   | 60   | 0.71     | 0.039877 | 63       | 0.67     | 0.073630 |          |
| 265829_at   | At2g14490 | unknown protein                                                                  | 48   | 83   | 77   | 71   | 89   | 70   | 69   | 77   | 0.90     | 0.571553 | 61       | 73   | 71   | 97   | 76   | 78   | 74   | 72   | 68   | 79   | 0.86     | 0.139484 | 84       | 0.81     | 0.111706 |          |
| 265830_at   | At2g14450 | putative helicase                                                                | 16   | 19   | 25   | 3    | 3    | 6    | 4    | 4    | 0.56     | 0.074002 | 3        | 3    | 4    | 5    | 4    | 4    | 7    | 3    | 4    | 10   | 0.7      | 0.063422 | 5        | 0.05     | 0.020886 |          |
| 265831_at   | At2g14460 | unknown protein                                                                  | 213  | 215  | 286  | 306  | 309  | 298  | 238  | 304  | 0.78     | 0.051222 | 250      | 307  | 282  | 424  | 326  | 289  | 371  | 352  | 279  | 352  | 0.79     | 0.064621 | 346      | 0.81     | 0.197805 |          |
| 265832_at   | At2g14450 | putative replication protein A1                                                  | 11   | 8    | 25   | 15   | 18   | 12   | 15   | 15   | 0.97     | 0.947549 | 9        | 12   | 10   | 8    | 10   | 10   | 6    | 8    | 10   | 9    | 1.21     | 0.118392 | 9        | 1.11     | 0.310334 |          |
| 265833_at   | At2g14420 | Mutator-like transposase similar to MU Mutator-like transposase family           | 35   | 44   | 46   | 40   | 46   | 41   | 42   | 42   | 0.98     | 0.833221 | 32       | 37   | 41   | 39   | 28   | 30   | 47   | 37   | 37   | 36   | 1.01     | 0.932606 | 32       | 1.13     | 0.380461 |          |
| 265834_at   | At2g14410 | hypothetical protein predicted by census                                         | 11   | 16   | 15   | 11   | 15   | 11   | 10   | 10.3 | 0.563017 | 13       | 14       | 13   | 14   | 11   | 11   | 13   | 13   | 14   | 13   | 11   | 1.02     | 0.803020 | 13       | 1.02     | 0.310332 |          |
| 265835_at   | At2g14400 | putative retroelement pol polyprotein                                            | 22   | 21   | 31   | 29   | 33   | 24   | 24   | 28   | 0.85     | 0.367826 | 19       | 25   | 21   | 23   | 15   | 24   | 20   | 20   | 22   | 20   | 1.06     | 0.657093 | 21       | 1.05     | 0.769626 |          |
| 265836_at   | At2g14570 | Mutator-like transposase similar to MU SWIM zinc finger family protein           | 19   | 17   | 24   | 29   | 24   | 30   | 20   | 28   | 0.72     | 0.049531 | 15       | 15   | 21   | 16   | 17   | 15   | 20   | 16   | 17   | 17   | 1.01     | 0.957775 | 16       | 1.06     | 0.671739 |          |
| 265837_at   | At2g14560 | unknown protein                                                                  | 36   | 52   | 74   | 42   | 49   | 42   | 54   | 44   | 1.23     | 0.429700 | 30       | 39   | 35   | 38   | 33   | 30   | 48   | 39   | 35   | 37   | 0.93     | 0.573027 | 33       | 1.04     | 0.745451 |          |
| 265838_at   | At2g14550 | putative telomerase associated protein                                           | 16   | 19   | 25   | 22   | 22   | 30   | 18   | 20   | 23       | 0.87     | 0.520520 | 18   | 18   | 18   | 18   | 14   | 18   | 15   | 17   | 18   | 1.10     | 0.160285 | 17       | 1.08     | 0.346814 |          |
| 265839_at   | At2g14540 | putative serpin                                                                  | 34   | 39   | 46   | 40   | 45   | 44   | 39   | 43   | 0.92     | 0.441703 | 36       | 36   | 40   | 41   | 33   | 36   | 38   | 38   | 37   | 37   | 1.01     | 0.894081 | 36       | 1.02     | 0.765006 |          |
| 265840_at   | At2g14530 | hypothetical protein predicted by census expressed-protein                       | 126  | 166  | 169  | 172  | 197  | 151  | 154  | 174  | 0.88     | 0.359789 | 139      | 127  | 149  | 175  | 150  | 130  | 147  | 145  | 138  | 150  | 0.92     | 0.324768 | 152      | 0.91     | 0.396373 |          |
| 265841_at   | At2g35710 | putative glycoprotein                                                            | 123  | 100  | 166  | 85   | 99   | 72   | 130  | 85   | 1.52     | 0.102547 | 61       | 67   | 60   | 81   | 51   | 55   | 69   | 68   | 63   | 65   | 0.97     | 0.804242 | 62       | 1.01     | 0.955036 |          |
| 265842_at   | At2g35700 | putative AP2 domain transcription factor                                         | 26   | 31   | 36   | 34   | 35   | 34   | 31   | 34   | 0.90     | 0.270978 | 25       | 24   | 27   | 30   | 25   | 27   | 27   | 30   | 25   | 28   | 0.92     | 0.206450 | 27       | 0.94     | 0.396152 |          |
| 265843_at   | At2g35690 | putative acyl-CoA oxidase                                                        | 45   | 60   | 60   | 52   | 53   | 41   | 55   | 49   | 1.13     | 0.370828 | 72       | 75   | 70   | 65   | 62   | 44   | 62   | 58   | 72   | 58   | 1.25     | 0.027649 | 57       | 1.27     | 0.078394 |          |
| 265844_at   | At2g35620 | putative receptor-like protein kinase                                            | 327  | 375  | 341  | 452  | 485  | 393  | 348  | 443  | 0.78     | 0.035300 | 240      | 188  | 233  | 261  | 249  | 201  | 255  | 247  | 220  | 243  | 0.91     | 0.277158 | 237      | 0.93     | 0.540460 |          |
| 265845_at   | At2g35610 | unknown protein                                                                  | 201  | 247  | 260  | 319  | 345  | 266  | 236  | 310  | 0.76     | 0.064288 | 154      | 139  | 171  | 222  | 193  | 154  | 191  | 178  | 155  | 188  | 0.82     | 0.090744 | 190      | 0.82     | 0.186117 |          |
| 265846_at   | At2g35770 | putative serine carboxypeptidase II                                              | 21   | 34   | 34   | 33   | 31   | 29   | 30   | 31   | 0.97     | 0.824719 | 24       | 27   | 26   | 25   | 23   | 25   | 25   | 26   | 26   | 25   | 1.03     | 0.385666 | 26       | 1.05     | 0.331555 |          |
| 265847_at   | At2g35750 | expressed protein                                                                | 141  | 225  | 257  | 251  | 284  | 257  | 208  | 264  | 0.79     | 0.192881 | 265      | 345  | 311  | 470  | 333  | 338  | 361  | 335  | 307  | 367  | 0.84     | 0.194961 | 380      | 0.81     | 0.223907 |          |
| 265848_at   | At2g35740 | putative sugar transporter                                                       | 42   | 48   | 62   | 69   | 75   | 48   | 51   | 64   | 0.80     | 0.257590 | 43       | 46   | 49   | 53   | 38   | 52   | 64   | 58   | 46   | 53   | 0.87     | 0.281624 | 48       | 0.96     | 0.762520 |          |
| 265849_at   | At2g35736 | hypothetical protein predicted by census expressed-protein                       | 83   | 117  | 144  | 115  | 118  | 113  | 115  | 116  | 0.99     | 0.964700 | 111      | 140  | 117  | 150  | 109  | 109  | 120  | 116  | 123  | 121  | 1.02     | 0.872169 | 123      | 1.00     | 0.998830 |          |
| 265850_at   | At2g35720 | putative DnaJ protein                                                            | 97   | 117  | 109  | 135  | 146  | 106  | 108  | 129  | 0.84     | 0.194378 | 76       | 64   | 79   | 91   | 91   | 72   | 86   | 82   | 73   | 84   | 0.87     | 0.098134 | 85       | 0.86     | 0.207219 |          |
| 265851_at   | At2g35760 | hypothetical protein predicted by census integral membrane family protein        | 1470 | 1347 | 1794 | 1750 | 1994 | 1714 | 1537 | 1619 | 0.84     | 0.151891 | 1447     | 1608 | 1510 | 2192 | 1768 | 1495 | 1788 | 1739 | 1522 | 1796 | 0.85     | 0.123712 | 1818     | 0.84     | 0.227319 |          |
| 265852_at   | At2g35650 | putative quercetin transferase                                                   | 168  | 238  | 253  | 257  | 298  | 221  | 220  | 259  | 0.85     | 0.371411 | 171      | 155  | 163  | 284  | 211  | 225  | 260  | 242  | 163  | 244  | 0.67     | 0.003637 | 240      | 0.68     | 0.026895 |          |
| 265853_at   | At2g35635 | ubiquitin-like (UBQ7), putative similar t                                        | 326  | 393  | 473  | 503  | 499  | 438  | 397  | 480  | 0.83     | 0.155663 | 369      | 430  | 381  | 555  | 428  | 405  | 507  | 489  | 393  | 477  | 0.83     | 0.074929 | 462      | 0.85     | 0.242027 |          |
| 265854_at   | At2g35795 | hypothetical protein predicted by geneF DnaJ heat shock N-terminal domain-co     | 320  | 460  | 475  | 436  | 521  | 434  | 422  | 464  | 0.91     | 0.478522 | 532      | 568  | 556  | 733  | 581  | 586  | 545  | 559  | 522  | 601  | 0.92     | 0.328916 | 633      | 0.87     | 0.188489 |          |
| 265855_at   | At2g35780 | putative serine carboxypeptidase II                                              | 497  | 649  | 636  | 749  | 883  | 592  | 594  | 741  | 0.80     | 0.204877 | 693      | 686  | 671  | 833  | 804  | 708  | 783  | 761  | 683  | 778  | 0.88     | 0.015746 | 782      | 0.87     | 0.080399 |          |
| 265856_at   | At2g35770 | Expressed protein ; supported by full-length cDNA: expressed protein             | 16   | 23   | 24   | 26   | 29   | 26   | 23   | 24   | 0.91     | 0.477008 | 23       | 24   | 21   | 17   | 17   | 23   | 24   | 22   | 22   | 23   | 0.92     | 0.452295 | 24       | 1.21     | 0.138837 |          |
| 265857_at   | At2g35715 | Expressed protein ; supported by full-length cDNA: expressed protein             | 52   | 62   | 81   | 72   | 72   | 70   | 62   | 71   | 0.87     | 0.390649 | 47       | 57   | 47   | 57   | 48   | 41   | 43   | 55   | 51   | 46   | 0.97     | 0.823755 | 44       | 1.06     | 0.748566 |          |
| 265858_at   | At2g35790 | unknown protein ; supported by cDNA: expressed protein                           | 393  | 668  | 429  | 519  | 583  | 447  | 430  | 517  | 0.83     | 0.126169 | 570      | 521  | 564  | 756  | 694  | 591  | 654  | 611  | 551  | 661  | 0.81     | 0.036607 | 680      | 0.81     | 0.062399 |          |
| 265859_at   | At2g35880 | unknown protein ; supported by cDNA: dual specificity protein phosphatase fam    | 419  | 414  | 780  | 626  | 704  | 525  | 604  | 618  | 0.98     | 0.909983 | 462      | 448  | 413  | 566  | 481  | 407  | 651  | 591  | 441  | 539  | 0.82     | 0.142694 | 585      | 0.91     | 0.416695 |          |
| 265860_at   | At2g35630 | similar to ch-TOG protein from Homo s                                            | 441  | 542  | 563  | 539  | 603  | 470  | 515  | 537  | 0.96     | 0.711116 | 429      | 340  | 448  | 500  | 458  | 362  | 447  | 438  | 405  | 441  | 0.92     | 0.302959 | 440      | 0.92     | 0.551150 |          |
| 265861_at   | At2g35670 | fertilization-independent seed 2 protein                                         | 30   | 46   | 43   | 18   | 18   | 24   | 39   | 20   | 1.95     | 0.022748 | 57       | 61   | 58   | 15   | 14   | 18   | 20   | 16   | 58   | 16   | 3.55     | 0.000000 | 16       | 3.75     | 0.000015 |          |
| 265862_at   | At2g35733 | predicted protein                                                                | 60   | 82   | 97   | 75   | 93   | 76   | 79   | 81   | 0.98     | 0.887157 | 38       | 39   | 41   | 48   | 43   | 50   | 53   | 51   | 39   | 49   | 0.79     | 0.086111 | 47       | 0.83     | 0.026416 |          |
| 265863_at   | At2g18115 | hypothetical protein predicted by census pseudogene, glycine-rich protein        | 258  | 259  | 45   | 38   | 47   | 48   | 33   | 44   | 0.74     | 0.188693 | 17       | 18   | 27   | 19   | 16   | 19   | 16   | 19   | 24   | 21   | 20       | 1.05     | 0.750613 | 18       | 1.14     | 0.506388 |
| 265864_at   | At2g18020 | Expressed protein ; supported by full-length cDNA: expressed protein             | 196  | 240  | 290  | 320  | 323  | 248  | 244  | 302  | 0.81     | 0.116284 | 228      | 298  | 302  | 414  | 299  | 253  | 276  | 321  | 299  | 253  | 0.89     | 0.453904 | 346      | 0.79     | 0.159122 |          |
| 265865_s_at | At2g18020 | 60S ribosomal protein L2                                                         | 6847 | 7358 | 7656 | 7669 | 8228 | 7378 | 7287 | 7758 | 0.94     | 0.241871 | 6024     | 6282 | 6705 | 7565 | 6610 | 5967 | 7469 | 7310 | 6337 | 6984 | 0.91     | 0.183677 | 6714     | 0.94     | 0.496355 |          |
| 265866_at   | At2g18010 | putative auxin-regulated protein                                                 | 20   | 29   | 33   | 25   | 30   | 32   | 27   | 29   | 0.93     | 0.662425 | 24       | 29   | 29   | 27   | 23   | 24   | 30   | 28   | 27   | 26   | 1.04     | 0.621344 | 25       | 1.10     | 0.286762 |          |
| 265867_at   | At2g17990 | unknown protein                                                                  | 243  | 319  | 349  | 376  | 412  | 321  | 304  | 370  | 0.82     | 0.183341 | 294      | 302  | 323  | 494  | 364  | 342  | 365  | 364  | 307  | 386  | 0.80     | 0.077313 | 400      | 0.77     | 0.125481 |          |
| 265868_at   | At2g17980 | hypothetical protein predicted by census hypothetical protein                    | 24   | 21   | 28   | 23   | 20   | 28   | 24   | 24   | 1.03     | 0.805294 | 24       | 24   | 33   | 25   | 23   | 20   | 25   | 30   | 27   | 25   | 1.12     | 0.373426 | 23       | 1.22     | 0.178212 |          |
| 265869_at   | At2g18010 | unknown protein                                                                  | 79   | 115  | 133  | 126  | 136  | 113  | 109  | 125  | 0.87     | 0.407781 | 102      | 96   | 93   | 137  | 121  | 94   | 130  | 121  | 93   | 119  | 0.80     | 0.069144 | 119      | 0.81     | 0.086126 |          |
| 265870_at   | At2g18090 | unknown protein                                                                  | 255  | 301  | 335  | 406  | 461  | 306  | 297  | 391  | 0.76     | 0.139978 | 178      | 146  | 171  | 221  | 222  | 183  | 193  | 192  | 165  | 202  | 0.82     | 0.026936 | 208      | 0.79     | 0.053594 |          |
| 265871_at   | At2g18080 | unknown protein possibly related to thyl serine carboxypeptidase S28 family prot | 22   | 23   | 37   | 29   | 29   | 23   | 27   | 27   | 1.01     | 0.975819 | 21       | 32   | 27   | 28   | 21   | 22   | 26   | 29   | 26   | 25   | 1.05     | 0.715212 | 24       | 1.10     | 0.554117 |          |
| 265872_at   | At2g18070 | hypothetical protein predicted by census hypothetical protein                    | 27   | 35   | 30   | 36   | 30   | 31   | 32   | 97   | 0.470652 | 28       | 25       | 28   | 28   | 23   | 26   | 35   | 27   | 27   | 28   | 0.97 | 0.754899 | 25       | 1.06     | 0.409896 |          |          |
| 265873_at   | At2g18060 | putative NAM (no apical meristem)-like                                           | 46   | 51   | 64   | 59   | 60   | 44   | 61   | 64   | 0.93     | 0.805294 | 52       | 67   | 69   | 63   | 61   | 47   | 66   | 63   | 59   | 67   | 0.67     | 0.569728 | 65       | 1.15     | 0.320400 |          |
| 265874_at   | At2g17930 | hypothetical protein similar to hvoothet FAT domain-containing protein / chosoh  | 583  | 769  | 707  | 748  | 911  | 702  | 707  | 787  | 0.90     | 0.418700 | 611      | 512  | 586  | 784  | 687  | 528  | 820  | 753  | 570  | 714  | 0.80     | 0.091447 | 666      | 0.85     | 0.295952 |          |
| 265875_at   | At2g17975 | predicted protein                                                                | 200  | 250  | 248  | 306  | 338  | 286  | 232  | 310  | 0.75     | 0.025724 | 260      | 247  | 316  | 394  | 359  | 289  | 326  | 323  | 275  | 338  | 0.81     | 0.065550 | 348      | 0.79     | 0.122027 |          |
| 265876_s_at | At2g18110 |                                                                                  |      |      |      |      |      |      |      |      |          |          |          |      |      |      |      |      |      |      |      |      |          |          |          |          |          |          |



|             |           |                                                                                        |     |      |      |      |      |      |      |      |          |          |          |     |      |      |      |      |      |      |     |      |          |          |      |          |          |
|-------------|-----------|----------------------------------------------------------------------------------------|-----|------|------|------|------|------|------|------|----------|----------|----------|-----|------|------|------|------|------|------|-----|------|----------|----------|------|----------|----------|
| 265642_at   | At2g27450 | putative nitrilase ; supported by full-length carbon-nitrogen hydrolase family protein | 285 | 387  | 394  | 424  | 477  | 368  | 355  | 423  | 0.84     | 0.226061 | 364      | 383 | 371  | 539  | 417  | 374  | 374  | 356  | 373 | 412  | 0.90     | 0.413137 | 444  | 0.84     | 0.228474 |
| 265643_at   | At2g27390 | hypothetical protein predicted by geneF: hypothetical protein predicted by geneF       | 15  | 19   | 19   | 16   | 15   | 18   | 18   | 16   | 1.07     | 0.156158 | 27       | 25  | 28   | 21   | 20   | 18   | 24   | 25   | 26  | 22   | 1.22     | 0.036212 | 20   | 1.33     | 0.003177 |
| 265644_at   | At2g27380 | hypothetical protein predicted by geneF: prolipase-rich family protein                 | 23  | 27   | 23   | 403  | 22   | 21   | 25   | 148  | 0.17     | 0.385281 | 19       | 23  | 22   | 17   | 18   | 22   | 21   | 15   | 21  | 19   | 1.14     | 0.230718 | 19   | 1.13     | 0.298242 |
| 265645_at   | At2g27370 | unknown protein ; supported by full-length integral membrane family protein            | 56  | 62   | 86   | 74   | 81   | 73   | 67   | 73   | 0.89     | 0.432616 | 49       | 50  | 67   | 59   | 62   | 51   | 67   | 65   | 53  | 51   | 0.90     | 0.272357 | 54   | 0.90     | 0.070306 |
| 265646_at   | At2g27360 | putative lipase                                                                        | 67  | 84   | 79   | 98   | 96   | 70   | 77   | 88   | 0.87     | 0.337954 | 46       | 42  | 69   | 75   | 70   | 67   | 76   | 81   | 52  | 74   | 0.71     | 0.021281 | 70   | 0.74     | 0.103807 |
| 265647_at   | At2g27410 | hypothetical protein predicted by geneF: hypothetical protein                          | 28  | 32   | 36   | 34   | 38   | 37   | 32   | 37   | 0.88     | 0.154925 | 30       | 29  | 39   | 32   | 26   | 30   | 35   | 33   | 33  | 31   | 1.06     | 0.563243 | 29   | 1.11     | 0.437284 |
| 265648_at   | At2g27500 | putative beta-1,3-glucanase ; supported by glycosyl hydrolase family 17 protein        | 26  | 33   | 36   | 32   | 33   | 29   | 36   | 32   | 1.13     | 0.549318 | 40       | 53  | 33   | 39   | 38   | 42   | 49   | 50   | 42  | 44   | 0.96     | 0.770602 | 40   | 1.06     | 0.720581 |
| 265649_at   | At2g27510 | putative ferredoxin ; supported by ferredoxin-like protein                             | 78  | 101  | 108  | 116  | 138  | 84   | 75   | 109  | 0.68     | 0.121858 | 84       | 86  | 987  | 148  | 117  | 102  | 109  | 107  | 105 | 104  | 0.77     | 0.054080 | 128  | 0.71     | 0.250132 |
| 265650_at   | At2g27460 | hypothetical protein predicted by geneF: sec23/sec24 transport family protein          | 196 | 240  | 277  | 305  | 327  | 255  | 237  | 295  | 0.80     | 0.141333 | 159      | 200 | 173  | 215  | 194  | 150  | 235  | 224  | 177 | 204  | 0.87     | 0.268893 | 186  | 0.95     | 0.702016 |
| 265651_at   | At2g13900 | hypothetical protein predicted by geneF: DC1 domain-containing protein                 | 7   | 7    | 11   | 10   | 8    | 7    | 8    | 1.03 | 0.884647 | 5        | 5        | 9   | 10   | 6    | 5    | 9    | 11   | 6    | 8   | 8    | 0.73     | 0.233302 | 7    | 0.84     | 0.586460 |
| 265652_x_at | At2g13890 | hypothetical protein predicted by geneF: pseudosubone, zinc knuckle (CCHC type)        | 16  | 19   | 20   | 15   | 24   | 22   | 18   | 2    | 0.92     | 0.572870 | 17       | 20  | 25   | 21   | 19   | 19   | 20   | 19   | 20  | 19   | 1.05     | 0.605132 | 19   | 1.05     | 0.709356 |
| 265653_at   | At2g13880 | hypothetical protein                                                                   | 2   | 3    | 1    | 2    | 4    | 2    | 3    | 0.82 | 0.229472 | 2        | 2        | 4   | 2    | 6    | 3    | 7    | 4    | 3    | 5   | 5    | 0.83     | 0.240981 | 4    | 0.70     | 0.411927 |
| 265654_s_at | At2g13870 | En/Spm-like transposon protein related CACTA-like transposase family (Pta/En           | 18  | 22   | 25   | 27   | 28   | 20   | 21   | 25   | 0.85     | 0.039377 | 20       | 19  | 20   | 20   | 18   | 16   | 23   | 18   | 20  | 19   | 1.05     | 0.584548 | 18   | 1.10     | 0.144846 |
| 265655_at   | At2g13920 | unknown protein contains weak PHD zinc pseudosubone, CPH-rich zinc finger protei       | 14  | 18   | 17   | 18   | 22   | 17   | 16   | 19   | 0.86     | 0.247179 | 13       | 16  | 13   | 12   | 15   | 16   | 12   | 11   | 14  | 13   | 1.08     | 0.468626 | 14   | 1.00     | 0.988860 |
| 265656_at   | At2g13820 | putative nonspecific lipid-transfer protein disease inhibitor/seed storage/lipid tran  | 79  | 109  | 96   | 122  | 131  | 122  | 95   | 125  | 0.76     | 0.029437 | 52       | 53  | 61   | 92   | 64   | 70   | 78   | 62   | 56  | 73   | 0.76     | 0.059410 | 75   | 0.74     | 0.093642 |
| 265657_at   | At2g13840 | unknown protein ; supported by cDNA: PHP domain-containing protein                     | 156 | 212  | 214  | 221  | 228  | 183  | 194  | 211  | 0.92     | 0.520621 | 185      | 203 | 192  | 258  | 207  | 201  | 217  | 202  | 193 | 217  | 0.89     | 0.165272 | 222  | 0.87     | 0.207893 |
| 265658_at   | At2g13810 | outative aspartate aminotransferase ; s aminotransferase class i and ii family or      | 36  | 38   | 54   | 52   | 55   | 43   | 54   | 70   | 0.77     | 0.021858 | 40       | 32  | 44   | 40   | 43   | 37   | 39   | 39   | 39  | 40   | 0.98     | 0.789356 | 40   | 0.96     | 0.737621 |
| 265659_at   | At2g25440 | putative disease resistance protein leucine-rich repeat family protein                 | 18  | 24   | 27   | 23   | 25   | 25   | 23   | 25   | 0.95     | 0.670290 | 13       | 15  | 16   | 15   | 14   | 16   | 12   | 14   | 14  | 14   | 1.01     | 0.609941 | 14   | 1.00     | 0.973441 |
| 265660_at   | At2g25470 | putative disease resistance protein leucine-rich repeat family protein                 | 27  | 32   | 32   | 28   | 40   | 29   | 30   | 32   | 0.95     | 0.712869 | 28       | 31  | 34   | 23   | 28   | 28   | 26   | 29   | 31  | 27   | 1.18     | 0.052848 | 26   | 1.20     | 0.090876 |
| 265663_at   | At2g25490 | F-box protein family, AFBEL contains F-box family protein (FBL6)                       | 620 | 698  | 655  | 821  | 859  | 639  | 624  | 773  | 0.81     | 0.160862 | 234      | 183 | 242  | 287  | 268  | 222  | 309  | 290  | 220 | 275  | 0.80     | 0.081443 | 258  | 0.85     | 0.221134 |
| 265664_at   | At2g25530 | hypothetical protein predicted by geneF: AFG1-like ATPase family protein               | 99  | 148  | 147  | 123  | 214  | 225  | 193  | 131  | 211      | 0.62     | 0.013239 | 120 | 110  | 133  | 235  | 190  | 143  | 165  | 150 | 121  | 0.69     | 0.051753 | 189  | 0.64     | 0.068387 |
| 265635_at   | At2g25360 | hypothetical protein predicted by geneF: zinc finger protein-related                   | 35  | 31   | 30   | 33   | 45   | 40   | 32   | 39   | 0.82     | 0.147188 | 23       | 26  | 25   | 29   | 22   | 25   | 21   | 25   | 25  | 26   | 0.94     | 0.497995 | 25   | 0.98     | 0.865206 |
| 265665_at   | At2g25540 | outative cellulose synthase catalytic sub cellulose synthase, catalytic subunit, out   | 130 | 153  | 245  | 221  | 234  | 185  | 176  | 213  | 0.83     | 0.382459 | 199      | 180 | 213  | 281  | 224  | 214  | 245  | 202  | 197 | 233  | 0.85     | 0.121290 | 240  | 0.82     | 0.140383 |
| 265666_s_at | At2g25550 | outative non-LTR retroelement reverse non-LTR retrotransposon family (LINE) /          | 26  | 24   | 26   | 24   | 27   | 24   | 23   | 25   | 0.94     | 0.547313 | 17       | 21  | 19   | 18   | 15   | 18   | 19   | 16   | 19  | 17   | 1.10     | 0.219690 | 17   | 1.11     | 0.278783 |
| 265667_at   | At2g25370 | hypothetical protein predicted by geneF: zinc finger protein-related                   | 27  | 29   | 31   | 30   | 25   | 24   | 29   | 26   | 1.10     | 0.305587 | 32       | 35  | 31   | 30   | 40   | 33   | 33   | 30   | 32  | 31   | 1.05     | 0.267599 | 31   | 1.05     | 0.337458 |
| 265668_at   | At2g25380 | hypothetical protein predicted by geneF: zinc finger protein-related                   | 16  | 21   | 28   | 28   | 30   | 31   | 22   | 30   | 0.72     | 0.070690 | 17       | 15  | 15   | 17   | 15   | 17   | 19   | 16   | 15  | 17   | 0.92     | 0.164196 | 17   | 0.93     | 0.264886 |
| 265669_at   | At2g25420 | hypothetical protein predicted by geneF: transducin family protein / WD-40 repeat      | 120 | 177  | 166  | 264  | 300  | 238  | 154  | 267  | 0.58     | 0.010673 | 164      | 166 | 182  | 324  | 242  | 216  | 224  | 219  | 170 | 245  | 0.70     | 0.034253 | 261  | 0.65     | 0.052467 |
| 265610_at   | At2g25430 | unknown protein ; supported by full-length N-terminal homoloov (ENTH) dom              | 460 | 519  | 534  | 630  | 684  | 520  | 505  | 612  | 0.83     | 0.114344 | 471      | 460 | 469  | 763  | 562  | 493  | 612  | 590  | 467 | 604  | 0.77     | 0.060499 | 606  | 0.77     | 0.161120 |
| 265611_at   | At2g25510 | unknown protein ; supported by full-length expressed protein // expressed protein      | 42  | 41   | 69   | 54   | 49   | 30   | 51   | 44   | 1.14     | 0.161793 | 27       | 28  | 37   | 30   | 26   | 35   | 38   | 31   | 33  | 0.94 | 0.623111 | 30       | 1.02 | 0.867343 |          |
| 265612_at   | At2g25390 | hypothetical protein predicted by geneF: pseudosubone, hypothetical protein            | 19  | 21   | 23   | 22   | 21   | 19   | 22   | 0.85 | 0.094335 | 17       | 14       | 17  | 15   | 15   | 17   | 16   | 15   | 17   | 16  | 16   | 1.14     | 0.275077 | 16   | 1.15     | 0.253245 |
| 265613_at   | At2g25560 | putative DnaJ protein ; supported by cl DNAJ heat shock N-terminal domain-con          | 183 | 253  | 263  | 284  | 316  | 242  | 233  | 281  | 0.83     | 0.221774 | 174      | 158 | 196  | 230  | 203  | 178  | 235  | 206  | 176 | 210  | 0.84     | 0.073837 | 203  | 0.87     | 0.212539 |
| 265614_at   | At2g25535 | Expressed protein ; supported by cDNA: exonuclease-related                             | 353 | 394  | 387  | 428  | 490  | 386  | 378  | 435  | 0.87     | 0.159415 | 403      | 342 | 439  | 490  | 461  | 418  | 508  | 441  | 395 | 464  | 0.85     | 0.061478 | 457  | 0.86     | 0.155182 |
| 265615_at   | At2g25450 | putative dioxygenase ; supported by cl 2-oxoglutarate-dependent dioxygenase,           | 34  | 31   | 52   | 41   | 43   | 51   | 37   | 45   | 0.87     | 0.459535 | 32       | 62  | 43   | 57   | 63   | 51   | 73   | 76   | 46  | 64   | 0.71     | 0.088968 | 57   | 0.80     | 0.301005 |
| 265616_at   | At2g25500 | hypothetical protein predicted by geneF: expressed protein                             | 10  | 10   | 7    | 10   | 7    | 10   | 9    | 9    | 0.94     | 0.727877 | 4        | 7   | 5    | 7    | 6    | 7    | 6    | 7    | 6   | 6    | 0.89     | 0.484951 | 6    | 0.84     | 0.399136 |
| 265617_at   | At2g25520 | outative chosholate/chosholemoivuvru phosphate translocator-related                    | 977 | 1208 | 1276 | 1396 | 1420 | 1104 | 1154 | 1307 | 0.88     | 0.323000 | 998      | 932 | 1064 | 1325 | 1100 | 1079 | 1061 | 1034 | 998 | 1120 | 0.89     | 0.156810 | 1168 | 0.85     | 0.124018 |
| 265618_at   | At2g25460 | hypothetical protein                                                                   | 15  | 16   | 21   | 19   | 22   | 24   | 17   | 21   | 0.81     | 0.151652 | 9        | 16  | 14   | 14   | 8    | 13   | 11   | 13   | 13  | 12   | 1.11     | 0.543613 | 12   | 1.11     | 0.661391 |
| 265619_at   | At2g27320 | hypothetical protein                                                                   | 34  | 34   | 52   | 44   | 41   | 54   | 39   | 46   | 0.83     | 0.380860 | 32       | 26  | 48   | 35   | 37   | 33   | 48   | 36   | 35  | 38   | 0.94     | 0.698814 | 35   | 1.01     | 0.964200 |
| 265620_at   | At2g27310 | F-box family protein                                                                   | 84  | 87   | 123  | 123  | 101  | 82   | 98   | 106  | 0.93     | 0.650192 | 45       | 45  | 75   | 64   | 44   | 46   | 78   | 82   | 55  | 63   | 0.85     | 0.563498 | 51   | 0.87     | 0.708257 |
| 265621_at   | At2g27300 | NAM (no apical meristem)-like protein no apical meristem (NAM) family protein          | 20  | 27   | 32   | 31   | 44   | 36   | 26   | 37   | 0.71     | 0.115637 | 26       | 25  | 30   | 40   | 25   | 28   | 38   | 27   | 34  | 0.80 | 0.165637 | 31       | 0.87 | 0.472635 |          |
| 265622_at   | At2g27280 | unknown protein                                                                        | 9   | 9    | 9    | 7    | 11   | 6    | 9    | 8    | 1.16     | 0.459352 | 6        | 7   | 7    | 5    | 6    | 14   | 6    | 3    | 7   | 0.99 | 0.985622 | 8        | 0.82 | 0.644275 |          |
| 265623_at   | At2g27270 | hypothetical protein predicted by geneF: expressed protein                             | 29  | 33   | 41   | 37   | 42   | 33   | 34   | 37   | 0.92     | 0.557337 | 24       | 14  | 29   | 27   | 25   | 23   | 31   | 30   | 22  | 27   | 0.82     | 0.254665 | 25   | 0.90     | 0.602581 |
| 265624_at   | At2g27250 | CLAVATA3 CLE family of proteins: lisa CLAVATA3                                         | 27  | 27   | 32   | 38   | 45   | 40   | 27   | 41   | 0.65     | 0.017838 | 20       | 33  | 24   | 34   | 31   | 26   | 28   | 26   | 29  | 0.89 | 0.381987 | 30       | 0.85 | 0.351861 |          |
| 265625_at   | At2g27240 | hypothetical protein predicted by geneF: expressed protein                             | 41  | 47   | 54   | 47   | 58   | 43   | 41   | 47   | 0.88     | 0.323668 | 41       | 54  | 58   | 60   | 54   | 58   | 49   | 48   | 41  | 56   | 1.08     | 0.452389 | 50   | 1.15     | 0.253245 |
| 265626_at   | At2g27260 | unknown protein ; supported by full-length expressed protein                           | 275 | 485  | 561  | 721  | 782  | 628  | 507  | 710  | 0.71     | 0.017747 | 509      | 552 | 506  | 780  | 580  | 580  | 602  | 568  | 522 | 622  | 0.84     | 0.116982 | 647  | 0.81     | 0.143456 |
| 265627_at   | At2g27285 | Expressed protein ; supported by full-length expressed protein                         | 175 | 239  | 208  | 215  | 238  | 202  | 207  | 218  | 0.95     | 0.630375 | 238      | 234 | 234  | 348  | 271  | 240  | 350  | 321  | 235 | 306  | 0.77     | 0.051743 | 286  | 0.82     | 0.189508 |
| 265628_at   | At2g27290 | hypothetical protein predicted by geneF: expressed protein                             | 98  | 141  | 169  | 160  | 175  | 135  | 136  | 157  | 0.87     | 0.427841 | 160      | 165 | 163  | 213  | 213  | 177  | 204  | 200  | 163 | 197  | 0.83     | 0.006133 | 194  | 0.84     | 0.044189 |
| 265629_at   | At2g27330 | unknown protein ; supported by cDNA: transcription factor-related                      | 786 | 1029 | 934  | 1029 | 886  | 918  | 1029 | 934  | 0.94     | 0.256178 | 547      | 495 | 564  | 718  | 745  | 625  | 746  | 715  | 617 | 696  | 0.77     | 0.001897 | 696  | 0.77     | 0.019412 |
| 265630_at   | At2g27350 | unknown protein similar to ovarian tumor OTU-like cysteine protease family protei      | 274 | 370  | 402  | 416  | 470  | 372  | 349  | 419  | 0.83     | 0.214345 | 314      | 312 | 352  | 473  | 372  | 319  | 410  | 432  | 326 | 401  | 0.81     | 0.083368 | 388  | 0.84     | 0.257460 |
| 265631_at   | At2g14300 | putative helicase                                                                      | 4   | 4    | 1    | 2    | 4    | 4    | 3    | 3    | 0.91     | 0.815634 | 2        | 6   | 5    | 3    | 5    | 6    | 5    | 6    | 5   | 5    | 0.92     | 0.723188 | 5    | 0.       |          |

|             |           |                                                    |                                               |     |     |     |      |      |      |     |      |          |          |      |      |      |     |     |     |      |     |      |     |       |          |          |       |          |          |
|-------------|-----------|----------------------------------------------------|-----------------------------------------------|-----|-----|-----|------|------|------|-----|------|----------|----------|------|------|------|-----|-----|-----|------|-----|------|-----|-------|----------|----------|-------|----------|----------|
| 265555_at   | At2g07500 | putative Mutator-like transposase relate           | Mutator-like transposase family               | 41  | 43  | 62  | 62   | 75   | 57   | 49  | 65   | 0.75     | 0.120301 | 33   | 39   | 46   | 43  | 40  | 33  | 45   | 41  | 39   | 40  | 0.98  | 0.811592 | 39       | 1.02  | 0.870941 |          |
| 265556_at   | At2g07490 | putative Athlia retroelement ORF1-like             | cyosv-like retrotransposon family (Athlia     | 20  | 18  | 30  | 30   | 25   | 27   | 23  | 27   | 0.83     | 0.283017 | 13   | 17   | 17   | 16  | 11  | 20  | 25   | 16  | 16   | 17  | 0.89  | 0.593003 | 16       | 1.01  | 0.979349 |          |
| 265557_at   | At2g05640 | unknown protein                                    | pycudogene, similar to putative helicase      | 19  | 28  | 27  | 32   | 30   | 25   | 32  | 0.78 | 0.075435 | 19       | 21   | 25   | 20   | 18  | 22  | 26  | 22   | 21  | 18   | 22  | 26    | 22       | 21       | 1.15  | 0.235054 |          |
| 265558_at   | At2g05580 | putative non-LTR retroelement reverse              | non-LTR retrotransposon family (LINE)         | 6   | 6   | 1   | 9    | 8    | 10   | 6   | 9    | 1.01     | 0.970565 | 8    | 8    | 8    | 8   | 8   | 9   | 8    | 9   | 8    | 10  | 1.07  | 0.365361 | 8        | 1.05  | 0.938879 |          |
| 265559_at   | At2g05530 | putative glycine-rich protein                      | glycine-rich protein                          | 23  | 29  | 33  | 36   | 31   | 32   | 28  | 33   | 0.86     | 0.279222 | 19   | 19   | 23   | 22  | 22  | 21  | 27   | 22  | 20   | 23  | 0.89  | 0.164768 | 22       | 0.93  | 0.324358 |          |
| 265560_at   | At2g05520 | putative glycine-rich protein                      | glycine-rich protein (GRP)                    | 39  | 86  | 53  | 43   | 49   | 42   | 60  | 44   | 1.34     | 0.343340 | 64   | 80   | 58   | 62  | 43  | 46  | 137  | 128 | 68   | 83  | 0.81  | 0.593136 | 50       | 1.34  | 0.121045 |          |
| 265561_s_at | At2g05510 | putative glycine-rich protein                      | glycine-rich protein /// glycine-rich protein | 17  | 20  | 29  | 27   | 29   | 27   | 22  | 28   | 0.79     | 0.186981 | 12   | 15   | 16   | 15  | 14  | 9   | 11   | 11  | 14   | 12  | 1.20  | 0.229457 | 13       | 1.12  | 0.527487 |          |
| 265562_at   | At2g05500 | putative glycine-rich protein                      | glycine-rich protein                          | 17  | 20  | 29  | 27   | 29   | 27   | 22  | 28   | 0.79     | 0.186981 | 12   | 15   | 16   | 15  | 14  | 9   | 11   | 11  | 14   | 12  | 1.20  | 0.229457 | 13       | 1.12  | 0.527487 |          |
| 265563_s_at | At2g05470 | putative glycine-rich protein                      | glycine-rich protein                          | 19  | 18  | 21  | 28   | 24   | 24   | 20  | 25   | 0.78     | 0.028327 | 14   | 17   | 20   | 18  | 20  | 21  | 20   | 14  | 17   | 19  | 0.92  | 0.507153 | 20       | 0.87  | 0.282602 |          |
| 265564_s_at | At2g05460 | putative glycine-rich protein                      | glycine-rich protein                          | 12  | 10  | 12  | 14   | 16   | 10   | 11  | 13   | 0.86     | 0.441928 | 12   | 17   | 14   | 10  | 10  | 11  | 8    | 9   | 14   | 10  | 1.47  | 0.008450 | 10       | 1.38  | 0.053291 |          |
| 265565_at   | At2g05610 | putative retroelement pol polyprotein              | gypv-like retrotransposon family              | 36  | 40  | 52  | 54   | 53   | 50   | 43  | 52   | 0.82     | 0.126601 | 37   | 35   | 35   | 37  | 31  | 35  | 36   | 32  | 35   | 34  | 1.03  | 0.496759 | 34       | 1.03  | 0.589445 |          |
| 265566_at   | At2g05600 | putative glycine-rich protein                      | glycine-rich protein                          | 46  | 54  | 62  | 58   | 57   | 57   | 54  | 57   | 0.84     | 0.06950  | 37   | 43   | 51   | 44  | 34  | 39  | 44   | 42  | 44   | 42  | 1.04  | 0.761940 | 38       | 1.16  | 0.302349 |          |
| 265567_at   | At2g05580 | unknown protein predicted by ceneid                | glycine-rich protein                          | 41  | 42  | 57  | 98   | 74   | 58   | 47  | 77   | 0.61     | 0.083173 | 42   | 37   | 40   | 35  | 39  | 31  | 63   | 57  | 40   | 45  | 0.88  | 0.555822 | 35       | 1.14  | 0.165253 |          |
| 265568_s_at | At2g05560 | unknown protein predicted by ceneid                | glycine-rich protein                          | 11  | 16  | 17  | 15   | 22   | 17   | 14  | 18   | 0.80     | 0.258949 | 16   | 14   | 14   | 17  | 12  | 23  | 17   | 14  | 15   | 16  | 0.90  | 0.544414 | 17       | 0.85  | 0.480275 |          |
| 265569_at   | At2g05620 | unknown protein                                    | supported by full-length expressed protein    | 151 | 231 | 185 | 209  | 207  | 198  | 189 | 205  | 0.92     | 0.533639 | 189  | 219  | 258  | 413 | 283 | 236 | 229  | 239 | 222  | 280 | 0.79  | 0.276655 | 311      | 0.72  | 0.193646 |          |
| 265570_at   | At2g05630 | putative microtubule-associated protein            | autophagy 8d (AP-8d)                          | 307 | 434 | 462 | 439  | 521  | 423  | 401 | 461  | 0.87     | 0.347126 | 426  | 511  | 436  | 639 | 516 | 481 | 539  | 488 | 457  | 529 | 0.87  | 0.176987 | 539      | 0.85  | 0.242129 |          |
| 265571_at   | At2g05540 | putative glycine-rich protein                      | glycine-rich protein                          | 109 | 492 | 219 | 117  | 161  | 108  | 274 | 129  | 2.12     | 0.276706 | 257  | 313  | 94   | 277 | 491 | 358 | 610  | 598 | 221  | 467 | 0.47  | 0.048915 | 376      | 0.59  | 0.163695 |          |
| 265572_at   | At2g05590 | unknown protein predicted by ceneid                | glycine-rich protein                          | 168 | 261 | 313 | 264  | 293  | 228  | 247 | 262  | 0.94     | 0.769486 | 247  | 280  | 254  | 382 | 278 | 299 | 303  | 252 | 260  | 303 | 0.86  | 0.204642 | 320      | 0.81  | 0.149163 |          |
| 265573_at   | At2g06140 | unknown protein                                    | glycine-rich protein                          | 13  | 14  | 22  | 15   | 25   | 15   | 16  | 19   | 0.87     | 0.594462 | 11   | 12   | 11   | 10  | 13  | 20  | 8    | 15  | 11   | 13  | 0.86  | 0.518676 | 14       | 0.80  | 0.416395 |          |
| 265574_s_at | At2g06130 | Mutator-like transposase similar to                | MU Mutator-like transposase family /// Mutat  | 7   | 10  | 11  | 8    | 10   | 12   | 10  | 10   | 0.96     | 0.840569 | 8    | 13   | 11   | 7   | 7   | 8   | 7    | 10  | 7    | 8   | 1.43  | 0.029296 | 7        | 1.48  | 0.080915 |          |
| 265575_at   | At2g06120 | unknown protein predicted by ceneid                | glycine-rich protein                          | 16  | 23  | 27  | 26   | 26   | 27   | 22  | 26   | 0.82     | 0.225520 | 18   | 14   | 16   | 22  | 21  | 15  | 20   | 20  | 16   | 20  | 0.83  | 0.125878 | 19       | 0.84  | 0.306670 |          |
| 265576_at   | At2g06110 | putative Athlia retroelement ORF1                  | cyosv-like retrotransposon family (Athlia     | 8   | 5   | 5   | 5    | 8    | 5    | 6   | 6    | 1.06     | 0.765669 | 5    | 10   | 7    | 5   | 7   | 8   | 14   | 6   | 7    | 8   | 0.87  | 0.652862 | 7        | 1.04  | 0.879187 |          |
| 265577_at   | At2g06090 | putative S1 self-incompatibility protein           | self-incompatibility protein-related          | 144 | 281 | 337 | 13   | 13   | 17   | 254 | 14   | 17.85    | 0.013973 | 1191 | 1081 | 1055 | 16  | 17  | 47  | 21   | 17  | 1109 | 23  | 47.37 | 0.000000 | 26       | 41.86 | 0.000015 |          |
| 265578_at   | At2g06040 | unknown protein predicted by ceneid                | glycine-rich protein                          | 71  | 82  | 99  | 107  | 110  | 85   | 84  | 100  | 0.84     | 0.218574 | 47   | 50   | 56   | 55  | 45  | 56  | 58   | 50  | 51   | 53  | 0.96  | 0.630492 | 52       | 0.98  | 0.817869 |          |
| 265579_at   | At2g06030 | unknown protein                                    | expressed protein                             | 138 | 178 | 190 | 184  | 205  | 163  | 168 | 184  | 0.91     | 0.480882 | 103  | 94   | 132  | 145 | 124 | 116 | 121  | 121 | 110  | 125 | 0.88  | 0.194214 | 129      | 0.85  | 0.260425 |          |
| 265580_at   | At2g06020 | unknown protein predicted by ceneid                | glycine-rich protein                          | 4   | 4   | 5   | 6    | 8    | 7    | 8   | 6    | 0.63     | 0.009699 | 7    | 5    | 6    | 7   | 11  | 6   | 8    | 7   | 8    | 8   | 0.70  | 0.100550 | 8        | 0.73  | 0.275900 |          |
| 265581_at   | At2g06010 | unknown protein predicted by ceneid                | glycine-rich protein                          | 138 | 238 | 240 | 226  | 258  | 197  | 205 | 227  | 0.90     | 0.598250 | 203  | 265  | 235  | 363 | 258 | 262 | 236  | 236 | 234  | 271 | 0.86  | 0.319440 | 295      | 0.80  | 0.192712 |          |
| 265582_at   | At2g06210 | putative TPR repeat nuclear phosphoprotein-related | TPR repeat nuclear phosphoprotein-related     | 156 | 219 | 196 | 226  | 246  | 187  | 193 | 220  | 0.88     | 0.314832 | 151  | 137  | 169  | 193 | 181 | 142 | 178  | 174 | 152  | 174 | 0.88  | 0.164064 | 172      | 0.89  | 0.344743 |          |
| 265583_at   | At2g06190 | putative T3-oxv-like retroelement                  | cyosv-like retrotransposon family             | 78  | 82  | 102 | 99   | 94   | 94   | 87  | 96   | 0.91     | 0.337300 | 66   | 62   | 84   | 70  | 67  | 61  | 84   | 73  | 71   | 71  | 0.99  | 0.944375 | 66       | 1.07  | 0.572583 |          |
| 265584_at   | At2g06180 | unknown protein                                    | glycine-rich protein                          | 26  | 34  | 37  | 34   | 43   | 45   | 26  | 34   | 0.88     | 0.513176 | 24   | 26   | 34   | 28  | 27  | 22  | 22   | 21  | 24   | 22  | 1.01  | 0.029337 | 24       | 1.04  | 0.705524 |          |
| 265585_at   | At2g06170 | putative T3-oxv-like retroelement                  | cyosv-like retrotransposon family             | 52  | 63  | 67  | 81   | 74   | 66   | 61  | 74   | 0.83     | 0.111029 | 43   | 37   | 50   | 48  | 45  | 46  | 55   | 46  | 43   | 48  | 0.89  | 0.280824 | 46       | 0.94  | 0.464301 |          |
| 265586_x_at | At2g06160 | putative Athlia retroelement ORF1                  | cyosv-like retrotransposon family (Athlia     | 21  | 27  | 29  | 25   | 29   | 25   | 26  | 26   | 0.92     | 0.823234 | 21   | 17   | 20   | 21  | 14  | 23  | 17   | 17  | 19   | 18  | 1.05  | 0.677038 | 19       | 1.01  | 0.970097 |          |
| 265587_at   | At2g06150 | putative Athlia retroelement ORF1                  | cyosv-like retrotransposon family (Athlia     | 21  | 27  | 29  | 25   | 29   | 25   | 26  | 26   | 0.92     | 0.823234 | 21   | 17   | 20   | 21  | 14  | 23  | 17   | 17  | 19   | 18  | 1.05  | 0.677038 | 19       | 1.01  | 0.970097 |          |
| 265588_at   | At2g06140 | putative Athlia retroelement ORF1                  | cyosv-like retrotransposon family (Athlia     | 21  | 27  | 29  | 25   | 29   | 25   | 26  | 26   | 0.92     | 0.823234 | 21   | 17   | 20   | 21  | 14  | 23  | 17   | 17  | 19   | 18  | 1.05  | 0.677038 | 19       | 1.01  | 0.970097 |          |
| 265589_at   | At2g06130 | putative Athlia retroelement ORF1                  | cyosv-like retrotransposon family (Athlia     | 21  | 27  | 29  | 25   | 29   | 25   | 26  | 26   | 0.92     | 0.823234 | 21   | 17   | 20   | 21  | 14  | 23  | 17   | 17  | 19   | 18  | 1.05  | 0.677038 | 19       | 1.01  | 0.970097 |          |
| 265590_at   | At2g06120 | unknown protein predicted by ceneid                | glycine-rich protein                          | 16  | 11  | 17  | 14   | 18   | 13   | 16  | 15   | 0.80     | 0.317016 | 13   | 16   | 18   | 11  | 12  | 12  | 10   | 12  | 12   | 10  | 1.33  | 0.032655 | 12       | 1.29  | 0.116569 |          |
| 265591_at   | At2g06230 | unknown protein predicted by ceneid                | glycine-rich protein                          | 16  | 11  | 14  | 14   | 15   | 13   | 14  | 14   | 0.97     | 0.755231 | 13   | 9    | 12   | 13  | 11  | 13  | 16   | 11  | 11   | 13  | 0.87  | 0.327978 | 12       | 0.91  | 0.506032 |          |
| 265592_at   | At2g06050 | 12-oxooxylodienolite-10-11-reductase               | 12-oxooxylodienolite reductase (OPR3)         | 632 | 683 | 729 | 1095 | 1383 | 1156 | 682 | 1211 | 0.56     | 0.004505 | 574  | 541  | 562  | 886 | 830 | 739 | 1056 | 996 | 559  | 901 | 0.62  | 0.004112 | 818      | 0.68  | 0.004138 |          |
| 265593_at   | At2g06020 | unknown protein predicted by ceneid                | glycine-rich protein                          | 123 | 139 | 122 | 180  | 200  | 166  | 128 | 182  | 0.70     | 0.008820 | 163  | 134  | 167  | 225 | 206 | 189 | 165  | 151 | 155  | 187 | 0.83  | 0.148444 | 207      | 0.75  | 0.025139 |          |
| 265594_at   | At2g11370 | unknown protein predicted by ceneid                | glycine-rich protein                          | 11  | 12  | 16  | 13   | 12   | 14   | 13  | 13   | 0.99     | 0.926673 | 10   | 12   | 11   | 9   | 11  | 9   | 12   | 11  | 10   | 10  | 1.07  | 0.302678 | 10       | 1.07  | 0.440303 |          |
| 265595_at   | At2g11360 | putative replication protein A1                    | putative replication protein A1               | 10  | 12  | 16  | 14   | 17   | 17   | 13  | 16   | 0.81     | 0.196041 | 10   | 12   | 14   | 9   | 15  | 9   | 10   | 15  | 12   | 11  | 1.05  | 0.806662 | 11       | 1.09  | 0.692184 |          |
| 265596_at   | At2g11390 | En/Som-like transposon protein related             | CACATA-like transposase family (PttA/En       | 6   | 9   | 12  | 10   | 14   | 13   | 9   | 12   | 0.72     | 0.187686 | 10   | 11   | 11   | 11  | 11  | 10  | 15   | 10  | 13   | 11  | 12    | 0.89     | 0.300634 | 12    | 0.88     | 0.373863 |
| 265597_at   | At2g15900 | unknown protein predicted by ceneid                | glycine-rich protein                          | 101 | 139 | 138 | 131  | 175  | 102  | 126 | 136  | 0.93     | 0.707686 | 74   | 76   | 75   | 101 | 93  | 68  | 90   | 82  | 75   | 87  | 0.86  | 0.171445 | 87       | 0.86  | 0.293827 |          |
| 265598_at   | At2g15880 | unknown protein predicted by ceneid                | glycine-rich protein                          | 31  | 32  | 44  | 28   | 31   | 28   | 36  | 29   | 1.23     | 0.023903 | 32   | 30   | 29   | 23  | 17  | 24  | 36   | 38  | 30   | 28  | 1.10  | 0.627419 | 21       | 1.43  | 0.025986 |          |
| 265599_at   | At2g15870 | putative retroelement pol polyprotein              | cyosv-like retrotransposon family             | 44  | 61  | 60  | 61   | 60   | 61   | 62  | 62   | 0.88     | 0.374286 | 44   | 51   | 47   | 45  | 48  | 43  | 36   | 44  | 44   | 41  | 1.10  | 0.052133 | 43       | 1.11  | 0.177860 |          |
| 265600_at   | At2g15860 | unknown protein predicted by ceneid                | glycine-rich protein                          | 361 | 579 | 566 | 714  | 869  | 596  | 536 | 726  | 0.74     | 0.094924 | 524  | 468  | 607  | 767 | 692 | 580 | 594  | 559 | 533  | 638 | 0.84  | 0.311763 | 680      | 0.78  | 0.096615 |          |
| 265601_at   | At2g15830 | unknown protein                                    | expressed protein                             | 11  | 18  | 11  | 16   | 15   | 11   | 13  | 14   | 1.07     | 0.898098 | 19   | 17   | 17   | 16  | 15  | 14  | 19   | 14  | 18   | 16  | 1.13  | 0.162005 | 15       | 1.17  | 0.059016 |          |
| 265602_at   | At2g15810 | Mutator-like transposase similar to                | MU Mutator-like transposase family            | 35  | 31  | 34  | 29   | 35   | 33   | 34  | 32   | 1.03     | 0.631340 | 24   | 32   | 33   | 26  | 23  | 29  | 30   | 28  | 30   | 27  | 1.10  | 0.345879 | 26       | 1.15  | 0.294683 |          |
| 265603_at   | At2g15800 | unknown protein predicted by                       |                                               |     |     |     |      |      |      |     |      |          |          |      |      |      |     |     |     |      |     |      |     |       |          |          |       |          |          |





|             |           |                                                                                 |     |      |      |      |      |      |      |      |          |          |      |      |      |      |      |      |      |      |      |      |          |          |      |          |          |
|-------------|-----------|---------------------------------------------------------------------------------|-----|------|------|------|------|------|------|------|----------|----------|------|------|------|------|------|------|------|------|------|------|----------|----------|------|----------|----------|
| 265276_at   | At2g28400 | hypothetical protein predicted by geneS expressed protein                       | 76  | 100  | 247  | 155  | 183  | 117  | 141  | 152  | 0.93     | 0.864264 | 98   | 131  | 89   | 203  | 174  | 184  | 252  | 253  | 106  | 213  | 0.50     | 0.004426 | 187  | 0.57     | 0.006146 |
| 265277_at   | At2g28410 | unknown protein : supported by full-len expressed protein                       | 85  | 127  | 95   | 122  | 142  | 107  | 102  | 124  | 0.83     | 0.258530 | 46   | 48   | 51   | 66   | 59   | 53   | 53   | 45   | 48   | 55   | 0.87     | 0.190094 | 59   | 0.81     | 0.054938 |
| 265280_at   | At2g28330 | hypothetical protein predicted by geneS expressed protein                       | 88  | 113  | 116  | 187  | 172  | 134  | 106  | 164  | 0.64     | 0.030554 | 125  | 115  | 139  | 237  | 167  | 179  | 147  | 148  | 126  | 176  | 0.72     | 0.069380 | 194  | 0.65     | 0.039676 |
| 265282_at   | At2g28355 | Excessed protein : supported by full-len expressed protein                      | 16  | 20   | 23   | 14   | 23   | 13   | 22   | 0.90 | 0.432405 | 14       | 13   | 19   | 15   | 14   | 18   | 14   | 18   | 15   | 18   | 24   | 0.86     | 0.384141 | 11   | 0.88     | 0.868277 |
| 265281_at   | At2g28370 | unknown protein : supported by full-len expressed protein                       | 35  | 41   | 49   | 40   | 47   | 40   | 42   | 0.99 | 0.919890 | 38       | 30   | 40   | 39   | 33   | 36   | 45   | 42   | 36   | 39   | 92   | 0.421646 | 36       | 0.99 | 0.960152 |          |
| 265284_at   | At2g28380 | unknown protein : supported by cDNA: double-stranded RNA-binding domain (C      | 221 | 286  | 299  | 342  | 391  | 302  | 269  | 345  | 0.78     | 0.098781 | 312  | 337  | 327  | 490  | 403  | 378  | 389  | 382  | 326  | 408  | 0.80     | 0.025952 | 423  | 0.77     | 0.047244 |
| 265285_at   | At2g28390 | unknown protein : supported by cDNA: double-stranded RNA-binding domain (C      | 300 | 354  | 326  | 403  | 466  | 378  | 327  | 415  | 0.79     | 0.045238 | 251  | 277  | 308  | 429  | 359  | 314  | 368  | 377  | 279  | 369  | 0.76     | 0.016407 | 367  | 0.76     | 0.077070 |
| 265286_at   | At2g28390 | unknown protein : supported by cDNA: double-stranded RNA-binding domain (C      | 15  | 14   | 14   | 13   | 15   | 18   | 13   | 55   | 0.24     | 0.071030 | 11   | 11   | 12   | 12   | 14   | 11   | 11   | 11   | 11   | 11   | 0.91     | 0.958791 | 11   | 0.88     | 0.948494 |
| 265287_at   | At2g28390 | hypothetical protein predicted by geneS SAND family protein                     | 286 | 395  | 354  | 426  | 477  | 345  | 345  | 416  | 0.83     | 0.227396 | 295  | 251  | 304  | 412  | 337  | 320  | 344  | 336  | 283  | 350  | 0.81     | 0.035680 | 356  | 0.80     | 0.091151 |
| 265288_at   | At2g28430 | unknown protein : supported by cDNA: expressed protein                          | 399 | 507  | 485  | 573  | 644  | 483  | 464  | 566  | 0.82     | 0.146647 | 512  | 471  | 591  | 708  | 568  | 582  | 492  | 527  | 525  | 576  | 0.91     | 0.392590 | 619  | 0.85     | 0.186999 |
| 265289_s_at | At2g07695 | hypothetical protein                                                            | 70  | 76   | 64   | 75   | 74   | 103  | 70   | 84   | 0.83     | 0.244785 | 64   | 80   | 64   | 104  | 79   | 76   | 48   | 44   | 69   | 70   | 0.99     | 0.952033 | 86   | 0.80     | 0.186865 |
| 265290_s_at | At2g07698 | hypothetical protein                                                            | 294 | 284  | 316  | 478  | 360  | 401  | 298  | 413  | 0.72     | 0.032798 | 136  | 139  | 145  | 233  | 158  | 151  | 174  | 159  | 140  | 175  | 0.80     | 0.132347 | 181  | 0.77     | 0.196667 |
| 265291_s_at | At2g07701 | hypothetical protein                                                            | 27  | 28   | 32   | 35   | 39   | 33   | 29   | 35   | 0.82     | 0.304585 | 22   | 28   | 25   | 22   | 25   | 21   | 30   | 25   | 25   | 25   | 1.02     | 0.823551 | 23   | 1.00     | 0.357057 |
| 265292_s_at | At2g07707 | hypothetical protein                                                            | 126 | 172  | 117  | 220  | 225  | 182  | 138  | 209  | 0.66     | 0.032095 | 171  | 171  | 179  | 301  | 191  | 162  | 182  | 156  | 174  | 198  | 0.88     | 0.509114 | 218  | 0.80     | 0.354305 |
| 265293_s_at | At2g07713 | hypothetical protein                                                            | 35  | 35   | 35   | 38   | 43   | 39   | 34   | 40   | 0.87     | 0.050447 | 36   | 31   | 29   | 31   | 29   | 25   | 28   | 26   | 32   | 28   | 1.15     | 0.087083 | 28   | 1.14     | 0.228613 |
| 265294_s_at | At2g07715 | hypothetical protein                                                            | 50  | 60   | 64   | 64   | 68   | 60   | 58   | 64   | 0.91     | 0.283590 | 50   | 46   | 52   | 58   | 57   | 49   | 54   | 54   | 49   | 55   | 0.90     | 0.068334 | 55   | 0.90     | 0.160344 |
| 265295_s_at | At2g07718 | hypothetical protein                                                            | 24  | 34   | 35   | 50   | 46   | 43   | 31   | 47   | 0.66     | 0.018429 | 30   | 36   | 37   | 64   | 43   | 39   | 53   | 52   | 34   | 50   | 0.68     | 0.040977 | 49   | 0.71     | 0.156697 |
| 265296_s_at | At2g07721 | hypothetical protein                                                            | 45  | 46   | 68   | 57   | 64   | 71   | 53   | 64   | 0.83     | 0.270208 | 28   | 30   | 38   | 35   | 32   | 30   | 40   | 42   | 32   | 36   | 0.89     | 0.345042 | 32   | 0.99     | 0.921541 |
| 265297_s_at | At2g07719 | hypothetical protein                                                            | 84  | 106  | 123  | 103  | 124  | 123  | 104  | 117  | 0.89     | 0.410330 | 124  | 106  | 132  | 125  | 104  | 117  | 129  | 121  | 121  | 119  | 1.01     | 0.885120 | 116  | 1.04     | 0.641916 |
| 265298_s_at | At2g07714 | hypothetical protein                                                            | 25  | 31   | 36   | 36   | 38   | 41   | 30   | 38   | 0.80     | 0.086233 | 29   | 28   | 35   | 27   | 27   | 25   | 34   | 27   | 31   | 28   | 1.09     | 0.366626 | 28   | 1.16     | 0.159965 |
| 265299_s_at | At2g07706 | hypothetical protein                                                            | 42  | 48   | 44   | 46   | 58   | 42   | 45   | 48   | 0.92     | 0.505850 | 28   | 21   | 30   | 34   | 21   | 27   | 31   | 31   | 26   | 29   | 0.91     | 0.408120 | 27   | 0.96     | 0.815913 |
| 265300_s_at | At2g07696 | hypothetical protein                                                            | 35  | 35   | 31   | 41   | 47   | 30   | 34   | 40   | 0.85     | 0.304188 | 32   | 28   | 24   | 42   | 34   | 36   | 35   | 30   | 28   | 35   | 0.79     | 0.048121 | 37   | 0.75     | 0.045588 |
| 265301_s_at | At2g07692 | hypothetical protein                                                            | 25  | 26   | 27   | 29   | 31   | 33   | 24   | 31   | 0.79     | 0.042751 | 19   | 23   | 26   | 22   | 22   | 22   | 22   | 22   | 22   | 22   | 1.00     | 0.979122 | 21   | 1.07     | 0.542044 |
| 265302_s_at | At2g07691 | hypothetical protein                                                            | 35  | 42   | 42   | 41   | 51   | 48   | 40   | 47   | 0.85     | 0.119894 | 28   | 28   | 36   | 32   | 25   | 25   | 34   | 30   | 30   | 29   | 1.04     | 0.743308 | 27   | 1.11     | 0.432308 |
| 265303_s_at | At2g07693 | hypothetical protein                                                            | 13  | 10   | 10   | 12   | 15   | 9    | 11   | 12   | 0.89     | 0.557201 | 12   | 11   | 13   | 12   | 13   | 8    | 11   | 10   | 12   | 11   | 1.12     | 0.344360 | 11   | 1.09     | 0.577424 |
| 265304_s_at | At2g07705 | hypothetical protein                                                            | 26  | 32   | 31   | 36   | 34   | 35   | 30   | 35   | 0.85     | 0.046935 | 28   | 22   | 28   | 27   | 24   | 19   | 28   | 28   | 26   | 25   | 1.04     | 0.744377 | 23   | 1.11     | 0.423910 |
| 265305_s_at | At2g43040 | hypothetical protein predicted by geneS calmodulin-binding protein              | 144 | 147  | 157  | 177  | 194  | 154  | 149  | 175  | 0.85     | 0.103997 | 144  | 127  | 186  | 198  | 171  | 137  | 177  | 167  | 153  | 170  | 0.90     | 0.376826 | 169  | 0.90     | 0.552189 |
| 265306_s_at | At2g43020 | putative amine oxidase                                                          | 231 | 299  | 292  | 393  | 515  | 428  | 274  | 445  | 0.62     | 0.015347 | 346  | 338  | 338  | 475  | 399  | 308  | 583  | 601  | 341  | 473  | 0.72     | 0.123331 | 394  | 0.87     | 0.334210 |
| 265307_s_at | At2g43060 | expressed protein                                                               | 27  | 34   | 57   | 45   | 47   | 43   | 39   | 45   | 0.88     | 0.584913 | 125  | 150  | 118  | 61   | 57   | 52   | 80   | 61   | 131  | 62   | 2.11     | 0.003340 | 56   | 2.33     | 0.001650 |
| 265308_s_at | At2g43050 | putative pectinesterase                                                         | 47  | 74   | 52   | 47   | 52   | 47   | 52   | 47   | 0.85     | 0.046958 | 35   | 69   | 55   | 61   | 64   | 75   | 64   | 66   | 71   | 71   | 0.84     | 0.176551 | 69   | 0.77     | 0.065349 |
| 265309_s_at | At2g43030 | 50S ribosomal protein L3 :supported b                                           | 768 | 1231 | 1073 | 1016 | 1129 | 860  | 1024 | 1002 | 1.22     | 0.894165 | 1141 | 1230 | 1100 | 1488 | 1161 | 1184 | 1245 | 1275 | 1157 | 1271 | 0.91     | 0.216497 | 1278 | 0.91     | 0.342663 |
| 265310_s_at | At2g43010 | unknown protein : supported by cDNA: phytochrome-interacting factor 4 (PIF4).   | 90  | 136  | 101  | 92   | 97   | 81   | 80   | 90   | 0.89     | 0.302540 | 88   | 97   | 81   | 104  | 83   | 82   | 106  | 105  | 88   | 96   | 0.92     | 0.378329 | 90   | 0.98     | 0.882653 |
| 265311_s_at | At2g43190 | putative C2H2-type zinc finger protein L zinc finger (C2H2 type) family protein | 90  | 136  | 108  | 153  | 174  | 132  | 111  | 153  | 0.73     | 0.083352 | 62   | 47   | 60   | 234  | 160  | 165  | 204  | 165  | 56   | 186  | 0.30     | 0.005074 | 187  | 0.30     | 0.005914 |
| 265312_s_at | At2g43190 | putative receptor protein kinase similar                                        | 50  | 67   | 56   | 81   | 68   | 64   | 65   | 70   | 0.83     | 0.389751 | 37   | 31   | 36   | 58   | 42   | 37   | 46   | 35   | 37   | 46   | 0.71     | 0.234499 | 49   | 0.70     | 0.065298 |
| 265313_s_at | At2g01960 | unknown protein predicted by geneS: expressed protein                           | 29  | 32   | 44   | 37   | 40   | 33   | 35   | 37   | 0.95     | 0.739945 | 27   | 34   | 33   | 26   | 26   | 29   | 33   | 36   | 31   | 30   | 1.04     | 0.671360 | 27   | 1.16     | 0.128319 |
| 265314_s_at | At2g01980 | putative Na+/H+ antiporter                                                      | 74  | 97   | 93   | 117  | 124  | 97   | 88   | 113  | 0.78     | 0.089402 | 72   | 71   | 67   | 106  | 83   | 64   | 87   | 78   | 70   | 83   | 0.84     | 0.189558 | 84   | 0.83     | 0.307912 |
| 265315_s_at | At2g02020 | putative peptide/amino acid transporter                                         | 36  | 44   | 53   | 50   | 58   | 47   | 44   | 51   | 0.86     | 0.273897 | 38   | 38   | 43   | 50   | 51   | 46   | 47   | 50   | 40   | 49   | 0.81     | 0.022365 | 49   | 0.81     | 0.041105 |
| 265316_s_at | At2g02050 | unknown protein : supported by full-len NADH-ubiquinone oxidoreductase S18 b    | 906 | 1139 | 1167 | 1326 | 1372 | 1200 | 1071 | 1299 | 0.82     | 0.054268 | 916  | 873  | 963  | 1260 | 903  | 932  | 951  | 1009 | 903  | 952  | 0.84     | 0.525672 | 1068 | 0.89     | 0.297407 |
| 265317_s_at | At2g02040 | histidine transporter protein (PTR2-B) : s                                      | 317 | 368  | 407  | 463  | 499  | 351  | 364  | 438  | 0.83     | 0.225074 | 276  | 298  | 280  | 450  | 351  | 312  | 388  | 387  | 285  | 378  | 0.75     | 0.023705 | 371  | 0.77     | 0.106764 |
| 265318_s_at | At2g02010 | putative glutamate decarboxylase : su                                           | 31  | 27   | 37   | 62   | 54   | 59   | 32   | 58   | 0.54     | 0.001801 | 26   | 35   | 37   | 70   | 57   | 46   | 49   | 46   | 33   | 53   | 0.61     | 0.020252 | 58   | 0.57     | 0.033082 |
| 265319_s_at | At2g01970 | putative endosomal protein : sucoeter                                           | 520 | 572  | 649  | 792  | 862  | 672  | 580  | 775  | 0.75     | 0.043259 | 463  | 442  | 525  | 717  | 541  | 495  | 519  | 500  | 477  | 554  | 0.86     | 0.229648 | 584  | 0.82     | 0.209385 |
| 265320_s_at | At2g36710 | putative pectinesterase                                                         | 31  | 39   | 40   | 38   | 37   | 37   | 28   | 0.95 | 0.553019 | 26       | 22   | 20   | 21   | 24   | 21   | 23   | 23   | 23   | 23   | 23   | 0.98     | 0.822045 | 22   | 1.03     | 0.765370 |
| 265321_s_at | At2g36710 | putative pectinesterase                                                         | 19  | 20   | 26   | 26   | 26   | 19   | 28   | 0.69 | 0.005407 | 16       | 16   | 20   | 23   | 22   | 19   | 23   | 19   | 16   | 19   | 16   | 0.91     | 0.863316 | 21   | 0.94     | 0.645927 |
| 265322_s_at | At2g36720 | putative PHD-type zinc finger protein                                           | 200 | 270  | 297  | 299  | 330  | 240  | 259  | 290  | 0.89     | 0.491712 | 212  | 207  | 236  | 291  | 236  | 204  | 223  | 212  | 218  | 233  | 0.94     | 0.515559 | 244  | 0.90     | 0.388518 |
| 265323_s_at | At2g36730 | hypothetical protein                                                            | 117 | 164  | 152  | 151  | 177  | 156  | 144  | 161  | 0.89     | 0.351868 | 145  | 116  | 152  | 175  | 133  | 141  | 182  | 172  | 137  | 161  | 0.86     | 0.188057 | 149  | 0.92     | 0.520977 |
| 265324_s_at | At2g36740 | hypothetical protein predicted by geneS: V1 nuclear family protein              | 176 | 245  | 235  | 270  | 293  | 215  | 219  | 259  | 0.84     | 0.287774 | 237  | 204  | 252  | 352  | 261  | 245  | 225  | 235  | 231  | 264  | 0.88     | 0.348074 | 286  | 0.81     | 0.201206 |
| 265325_s_at | At2g36750 | putative glucosyl transferase                                                   | 17  | 20   | 17   | 28   | 21   | 18   | 25   | 0.72 | 0.042468 | 13       | 10   | 15   | 16   | 18   | 14   | 18   | 13   | 16   | 13   | 16   | 0.95     | 0.052042 | 17   | 0.76     | 0.068077 |
| 265326_s_at | At2g36760 | putative glucosyl transferase                                                   | 17  | 20   | 17   | 28   | 21   | 18   | 25   | 0.72 | 0.042468 | 13       | 10   | 15   | 16   | 18   | 14   | 18   | 13   | 16   | 13   | 16   | 0.95     | 0.052042 | 17   | 0.76     | 0.068077 |
| 265327_s_at | At2g36770 | putative glucosyl transferase                                                   | 12  | 16   | 21   | 22   | 19   | 17   | 16   | 19   | 0.84     | 0.357384 | 15   | 14   | 17   | 18   | 36   | 30   | 39   | 32   | 36   | 31   | 1.15     | 0.432945 | 28   | 1.27     | 0.310792 |
| 265328_s_at | At2g36790 | putative glucosyl transferase an EST m                                          | 23  | 3    |      |      |      |      |      |      |          |          |      |      |      |      |      |      |      |      |      |      |          |          |      |          |          |

















|          |           |                                                                                         |       |       |       |       |       |       |       |       |          |           |       |       |       |       |       |       |       |       |       |          |          |          |          |          |          |          |      |          |
|----------|-----------|-----------------------------------------------------------------------------------------|-------|-------|-------|-------|-------|-------|-------|-------|----------|-----------|-------|-------|-------|-------|-------|-------|-------|-------|-------|----------|----------|----------|----------|----------|----------|----------|------|----------|
| 243392   | At1g11920 | pectate lyase-like protein similar to stv1 pectate lyase family protein                 | 40    | 28    | 31    | 34    | 33    | 30    | 27    | 32    | 0.83     | 0.182362  | 24    | 27    | 22    | 18    | 22    | 22    | 27    | 25    | 1.21  | 0.024780 | 22       | 1.22     | 0.091245 |          |          |          |      |          |
| 243392   | At1g11920 | pectate lyase-like protein similar to sal-uid pentaricopeptide (PPR) repeat-contains    | 48    | 68    | 68    | 75    | 79    | 72    | 61    | 75    | 0.81     | 0.169955  | 50    | 63    | 69    | 104   | 66    | 57    | 76    | 73    | 0.79  | 0.205875 | 76       | 0.79     | 0.347602 |          |          |          |      |          |
| 243393   | At1g11880 | unknown protein Contains similarity to I expressed protein                              | 90    | 111   | 106   | 121   | 137   | 114   | 102   | 124   | 0.82     | 0.082075  | 80    | 74    | 63    | 112   | 87    | 86    | 101   | 94    | 0.82  | 0.128486 | 95       | 0.87     | 0.285415 |          |          |          |      |          |
| 243394   | At1g11860 | aminomethyltransferase-like precursor aminomethyltransferase, putative                  | 397   | 534   | 500   | 632   | 605   | 499   | 477   | 579   | 0.82     | 0.152514  | 505   | 552   | 569   | 942   | 634   | 658   | 641   | 602   | 542   | 695      | 0.78     | 0.118126 | 745      | 0.73     | 0.114228 |          |      |          |
| 243395   | At1g12070 | putative GDP-dissociation inhibitor Ctr Rho GDP-dissociation inhibitor family           | 21    | 16    | 26    | 22    | 22    | 21    | 24    | 0.84  | 0.029585 | 28        | 17    | 20    | 22    | 18    | 16    | 18    | 16    | 19    | 19    | 0.1      | 0.374179 | 19       | 0.08     | 0.866922 |          |          |      |          |
| 243396   | At1g12090 | human deacetylase-like protein                                                          | 733   | 814   | 1033  | 1073  | 904   | 865   | 871   | 1005  | 0.81     | 0.076821  | 757   | 741   | 741   | 981   | 981   | 1020  | 1065  | 981   | 1020  | 1065     | 0.71     | 0.024494 | 1059     | 0.7      | 0.088320 |          |      |          |
| 243397   | At1g1820  | hypothetical protein                                                                    | 513   | 587   | 572   | 704   | 754   | 651   | 557   | 703   | 0.79     | 0.071258  | 427   | 375   | 475   | 703   | 585   | 496   | 519   | 533   | 426   | 567      | 0.75     | 0.398099 | 595      | 0.72     | 0.064522 |          |      |          |
| 243397   | At1g12100 | hydrolytic-rich protein, putative sir protease inhibitor-like storaealloid tran         | 26    | 32    | 37    | 46    | 46    | 43    | 32    | 45    | 0.70     | 0.017177  | 23    | 31    | 32    | 35    | 30    | 27    | 28    | 27    | 29    | 29       | 0.97     | 0.785134 | 31       | 0.93     | 0.618909 |          |      |          |
| 243371   | At1g12100 | ceARL1-like protein may be inducible, c protease inhibitor-like storaealloid tran       | 629   | 635   | 780   | 826   | 911   | 738   | 681   | 825   | 0.83     | 0.101787  | 1600  | 2066  | 1780  | 1978  | 1419  | 1356  | 1878  | 1815  | 1678  | 108      | 0.500122 | 1585     | 1.15     | 0.398691 |          |          |      |          |
| 243372   | At1g12100 | lactone hydrolase-like protein                                                          | 10972 | 13031 | 12671 | 12738 | 12301 | 12671 | 12301 | 12671 | 0.83     | 0.133819  | 12301 | 12671 | 12301 | 12671 | 12301 | 12671 | 12301 | 12671 | 12301 | 12671    | 0.83     | 0.133819 | 12301    | 12671    | 0.83     | 0.133819 |      |          |
| 243373   | At1g11890 | autative vesicle transport protein Conta vesicle transport protein SEC22, putative      | 487   | 483   | 545   | 621   | 623   | 563   | 505   | 602   | 0.84     | 0.026395  | 486   | 532   | 549   | 749   | 603   | 539   | 522   | 493   | 522   | 581      | 0.90     | 0.382047 | 630      | 0.83     | 0.171404 |          |      |          |
| 243432   | At1g12080 | unknown protein : succoated by full-len expressed protein                               | 147   | 217   | 214   | 91    | 124   | 81    | 193   | 99    | 1.95     | 0.023241  | 112   | 113   | 78    | 103   | 53    | 64    | 61    | 58    | 101   | 68       | 1.49     | 0.063757 | 73       | 1.38     | 0.219253 |          |      |          |
| 243433   | At1g11850 | unknown protein : supported by full-len expressed protein                               | 74    | 86    | 97    | 95    | 105   | 94    | 86    | 98    | 0.87     | 0.173298  | 40    | 39    | 71    | 51    | 41    | 42    | 50    | 46    | 50    | 47       | 1.07     | 0.688922 | 69       | 1.10     | 0.708601 |          |      |          |
| 243434   | At1g11850 | putative aspartic protease similar to C2 domain-containing protein family               | 3249  | 2414  | 3421  | 3099  | 2414  | 3421  | 3099  | 2414  | 0.87     | 0.037149  | 2647  | 2617  | 3099  | 3099  | 2647  | 2617  | 3099  | 3099  | 2647  | 2617     | 0.87     | 0.037149 | 2647     | 2617     | 0.87     | 0.037149 |      |          |
| 243435   | At1g11915 | Expressed protein : supported by cDNF expressed protein                                 | 67    | 88    | 96    | 97    | 107   | 84    | 84    | 96    | 0.87     | 0.0323169 | 62    | 64    | 75    | 81    | 64    | 64    | 75    | 81    | 64    | 64       | 0.86     | 0.75     | 0.73     | 0.91     | 0.392706 | 69       | 0.97 | 0.823699 |
| 243436   | At1g12100 | autative amin-cvdoroane-carboxylic I-amin-cvdoroane family-1-carboxylate cyc            | 14    | 15    | 74    | 18    | 19    | 13    | 18    | 1.88  | 0.068898 | 408       | 621   | 49    | 303   | 1068  | 513   | 869   | 817   | 359   | 714   | 0.50     | 0.155885 | 628      | 0.57     | 0.366009 |          |          |      |          |
| 243437   | At1g12040 | autative extension strong similarity to ext leucine-rich repeat family protein / exten  | 13    | 13    | 13    | 16    | 13    | 19    | 13    | 16    | 0.81     | 0.165955  | 14    | 20    | 14    | 12    | 11    | 10    | 13    | 12    | 16    | 12       | 1.38     | 0.036371 | 11       | 1.44     | 0.083993 |          |      |          |
| 243438   | At1g12110 | putative NPK1-related protein C2: nitrate/chlorate transporter (NRT1.L1) c              | 106   | 147   | 107   | 146   | 106   | 96    | 132   | 145   | 0.86     | 0.027938  | 60    | 130   | 145   | 130   | 155   | 130   | 155   | 130   | 155   | 130      | 1.52     | 0.127116 | 127      | 1.51     | 0.086179 |          |      |          |
| 243439   | At1g11930 | putative Protein synthase associated aminoacyl tRNA synthetase family                   | 407   | 630   | 687   | 660   | 788   | 635   | 541   | 694   | 0.82     | 0.089583  | 620   | 800   | 660   | 1011  | 738   | 795   | 742   | 695   | 802   | 920      | 0.82     | 0.235708 | 825      | 0.80     | 0.202801 |          |      |          |
| 243440   | At1g11870 | putative serv1-RNA related protein / serv1-RNA synthase, putative / serine-             | 113   | 146   | 169   | 160   | 188   | 138   | 143   | 160   | 0.89     | 0.0450843 | 134   | 155   | 146   | 191   | 140   | 141   | 163   | 155   | 145   | 158      | 0.92     | 0.355564 | 158      | 0.92     | 0.517232 |          |      |          |
| 243451   | At1g03370 | unknown protein Contains similarity to C2 domain-containing protein / GRAM d            | 149   | 175   | 228   | 205   | 201   | 188   | 184   | 198   | 0.93     | 0.593446  | 95    | 71    | 111   | 111   | 77    | 74    | 99    | 92    | 90    | 1.02     | 0.863915 | 87       | 1.06     | 0.783249 |          |          |      |          |
| 243452   | At1g03370 | unknown protein Strong similarity to ext expressed protein                              | 68    | 94    | 95    | 101   | 126   | 102   | 86    | 110   | 0.78     | 0.117390  | 96    | 90    | 97    | 115   | 113   | 89    | 116   | 105   | 94    | 108      | 0.88     | 0.098901 | 106      | 0.89     | 0.249613 |          |      |          |
| 243453   | At1g03370 | hypothetical protein predicted by gene expressed protein                                | 101   | 128   | 101   | 128   | 111   | 116   | 118   | 111   | 0.81     | 0.0837575 | 129   | 101   | 114   | 128   | 99    | 105   | 119   | 107   | 105   | 119      | 0.81     | 0.245487 | 107      | 0.81     | 0.245487 |          |      |          |
| 243454_s | At1g03240 | unknown protein similar to Lambda-PR expressed protein // hypothetical protein          | 13    | 22    | 20    | 25    | 25    | 25    | 18    | 23    | 0.81     | 0.283117  | 11    | 19    | 15    | 22    | 18    | 10    | 20    | 16    | 15    | 17       | 0.88     | 0.525494 | 17       | 0.90     | 0.695785 |          |      |          |
| 243455   | At1g03240 | unknown protein similar to PHZF, cat unknown protein similar to PHZF, cat               | 85    | 139   | 111   | 141   | 143   | 123   | 112   | 136   | 0.82     | 0.228751  | 140   | 146   | 151   | 243   | 196   | 171   | 198   | 188   | 146   | 199      | 0.73     | 0.543504 | 204      | 0.72     | 0.052530 |          |      |          |
| 243456   | At1g03190 | putative DNA repair protein Strong sim DNA repair protein / transcription factor        | 183   | 252   | 274   | 274   | 340   | 249   | 236   | 288   | 0.82     | 0.253307  | 192   | 148   | 193   | 251   | 211   | 188   | 221   | 215   | 178   | 217      | 0.82     | 0.062724 | 217      | 0.82     | 0.175823 |          |      |          |
| 243457   | At1g03190 | hypothetical protein predicted by gene expressed protein                                | 2567  | 218   | 261   | 405   | 368   | 405   | 368   | 405   | 0.89     | 0.046962  | 240   | 340   | 340   | 510   | 340   | 340   | 510   | 340   | 340   | 510      | 0.89     | 0.046962 | 240      | 340      | 0.89     | 0.046962 |      |          |
| 243458   | At1g03180 | hypothetical protein predicted by gene expressed protein                                | 80    | 96    | 86    | 108   | 113   | 105   | 87    | 109   | 0.81     | 0.0155232 | 86    | 75    | 114   | 127   | 105   | 107   | 88    | 87    | 92    | 103      | 0.89     | 0.425011 | 113      | 0.81     | 0.186772 |          |      |          |
| 243459   | At1g03320 | hypothetical protein predicted by gene expressed protein                                | 30    | 44    | 47    | 40    | 48    | 37    | 40    | 41    | 0.99     | 0.944311  | 26    | 24    | 27    | 32    | 31    | 25    | 26    | 22    | 26    | 26       | 1.00     | 0.997760 | 27       | 0.96     | 0.714803 |          |      |          |
| 243460   | At1g03320 | putative isoamylase Similar to al1652: isoamylase, putative / starch debranchin         | 157   | 185   | 211   | 314   | 303   | 277   | 184   | 288   | 0.62     | 0.003988  | 201   | 183   | 228   | 282   | 265   | 226   | 299   | 284   | 204   | 291      | 0.70     | 0.050310 | 291      | 0.70     | 0.140609 |          |      |          |
| 243461   | At1g03320 | putative isoamylase Similar to al1652: isoamylase, putative / starch debranchin         | 157   | 185   | 211   | 314   | 303   | 277   | 184   | 288   | 0.62     | 0.003988  | 201   | 183   | 228   | 282   | 265   | 226   | 299   | 284   | 204   | 291      | 0.70     | 0.050310 | 291      | 0.70     | 0.140609 |          |      |          |
| 243462   | At1g03320 | unknown protein ESTs abt136666, abt expressed protein                                   | 231   | 320   | 314   | 335   | 381   | 255   | 288   | 324   | 0.80     | 0.089529  | 244   | 204   | 276   | 334   | 268   | 247   | 281   | 292   | 241   | 284      | 0.85     | 0.130554 | 283      | 0.85     | 0.281173 |          |      |          |
| 243463   | At1g03170 | hypothetical protein predicted by gene expressed protein                                | 461   | 594   | 513   | 1035  | 1114  | 999   | 523   | 1040  | 0.59     | 0.005155  | 548   | 588   | 620   | 1377  | 868   | 728   | 672   | 662   | 583   | 871      | 0.67     | 0.153824 | 997      | 0.58     | 0.102649 |          |      |          |
| 243464   | At1g03330 | unknown protein Similar to abtU85207 small nuclear ribonucleoprotein C, outat           | 875   | 1148  | 1234  | 1227  | 1286  | 1115  | 1086  | 1209  | 0.90     | 0.358431  | 859   | 905   | 1020  | 1322  | 1104  | 923   | 1004  | 949   | 928   | 1060     | 0.88     | 0.245442 | 1116     | 0.83     | 0.206631 |          |      |          |
| 243465_s | At1g03220 | unknown protein Strong similarity to ext extracellular domain dvoroan, putative         | 91    | 106   | 91    | 85    | 104   | 73    | 95    | 88    | 1.09     | 0.403339  | 103   | 105   | 84    | 123   | 89    | 95    | 173   | 126   | 97    | 126      | 0.77     | 0.237780 | 102      | 0.95     | 0.705384 |          |      |          |
| 243466   | At1g03220 | unknown protein ESTs abtN936383, abt expressed protein                                  | 156   | 191   | 192   | 201   | 216   | 191   | 201   | 216   | 0.91     | 0.036859  | 179   | 216   | 216   | 246   | 216   | 216   | 246   | 216   | 216   | 246      | 0.91     | 0.036859 | 179      | 216      | 0.91     | 0.036859 |      |          |
| 243467   | At1g03380 | unknown protein ESTs abt17276, abt BSD domain-containing protein                        | 355   | 393   | 421   | 468   | 511   | 411   | 390   | 465   | 0.84     | 0.102641  | 361   | 311   | 353   | 516   | 415   | 385   | 404   | 414   | 341   | 426      | 0.80     | 0.041755 | 449      | 0.78     | 0.083645 |          |      |          |
| 243468   | At1g03350 | hypothetical protein Contains similarity transcription initiation factor IIE (TFIE) a   | 339   | 452   | 470   | 536   | 622   | 443   | 420   | 534   | 0.79     | 0.160826  | 339   | 363   | 407   | 516   | 451   | 458   | 382   | 523   | 484   | 371      | 426      | 0.74     | 0.076741 | 497      | 0.74     | 0.198309 |      |          |
| 243469   | At1g0430  | Ste-20 related kinase SPAK, putative / protein kinase family protein                    | 24    | 20    | 33    | 32    | 33    | 30    | 25    | 31    | 0.81     | 0.210510  | 22    | 22    | 17    | 20    | 18    | 23    | 22    | 19    | 20    | 21       | 0.99     | 0.921348 | 20       | 0.99     | 0.949755 |          |      |          |
| 243475_s | At1g03240 | hypothetical protein similar to ubi120: ubiquitin, putative / ubiquitin                 | 1169  | 1221  | 1221  | 1221  | 1221  | 1221  | 1221  | 1221  | 0.80     | 0.007400  | 1000  | 1000  | 1000  | 1000  | 1000  | 1000  | 1000  | 1000  | 1000  | 1000     | 0.80     | 0.007400 | 1000     | 1000     | 0.80     | 0.007400 |      |          |
| 243476   | At1g03360 | hypothetical protein Contains similarity I-F-box protein-related                        | 109   | 161   | 170   | 183   | 176   | 149   | 147   | 169   | 0.87     | 0.358771  | 132   | 140   | 165   | 202   | 134   | 156   | 161   | 150   | 146   | 161      | 0.91     | 0.406440 | 164      | 0.89     | 0.433555 |          |      |          |
| 243477   | At1g03350 | hypothetical protein predicted by gene expressed protein                                | 230   | 287   | 303   | 271   | 310   | 226   | 274   | 269   | 1.02     | 0.888231  | 220   | 253   | 292   | 375   | 292   | 267   | 268   | 271   | 255   | 301      | 0.85     | 0.182093 | 321      | 0.79     | 0.122300 |          |      |          |
| 243438   | At1g03300 | potassium transporter, putative similar potassium transporter, putative                 | 64    | 112   | 149   | 84    | 122   | 79    | 108   | 95    | 1.14     | 0.680212  | 51    | 50    | 56    | 63    | 60    | 56    | 71    | 61    | 52    | 62       | 0.84     | 0.028121 | 60       | 0.87     | 0.048404 |          |      |          |
| 243439   | At1g03300 | trehalase-5-phosphatase synthase, putative / trehalase-5-phosphatase synthase, putative | 139   | 169   | 169   | 169   | 169   | 169   | 169   | 169   | 0.84     | 0.038147  | 114   | 126   | 126   | 126   | 126   | 126   | 126   | 126   | 126   | 126      | 0.84     | 0.038147 | 114      | 126      | 0.84     | 0.038147 |      |          |
| 243440   | At1g0270  | unknown protein similar to hypothetical NHL repeat-containing protein                   | 146   | 176   | 187   | 167   | 180   | 150   | 170   | 165   | 1.02     | 0.800315  | 184   | 194   | 214   | 266   | 213   | 195   | 215   | 221   | 196   | 222      | 0.88     | 0.173521 | 225      | 0.87     | 0.275753 |          |      |          |
| 243441   | At1g0270  | hypothetical protein predicted by gene expressed protein                                | 37    | 34    | 26    | 56    | 61    | 47    | 32    | 55    | 0.59     | 0.012050  | 14    | 14    | 11    | 36    | 25    | 22    | 24    | 20    | 14    | 22       | 0.55     | 0.025393 | 28       | 0.51     | 0.034943 |          |      |          |
| 243411   | At1g0400  | hypothetical protein similar to hvoothi hypothetical protein                            | 28    | 25    | 38    | 30    | 32    | 34    | 30    | 32    | 0.93     | 0.598248  | 29    | 27    | 36    | 29    | 23    | 22    | 25    | 22    | 25    | 22       | 1.27     | 0.048905 | 25       | 1.25     | 0.150370 |          |      |          |
| 243412   | At1g0450  | putative protein kinase similar to protein kinase family protein                        | 26    | 22    | 35    | 34</  |       |       |       |       |          |           |       |       |       |       |       |       |       |       |       |          |          |          |          |          |          |          |      |          |





|             |           |                                                                                                        |      |      |      |      |      |      |      |      |          |          |      |      |      |      |      |      |      |      |      |      |          |          |      |          |          |
|-------------|-----------|--------------------------------------------------------------------------------------------------------|------|------|------|------|------|------|------|------|----------|----------|------|------|------|------|------|------|------|------|------|------|----------|----------|------|----------|----------|
| 264086_at   | At2g31190 | unknown protein // supported by full-length expressed protein                                          | 112  | 150  | 162  | 164  | 183  | 148  | 141  | 165  | 0.85     | 0.255061 | 126  | 135  | 145  | 204  | 164  | 162  | 156  | 148  | 136  | 167  | 0.81     | 0.061108 | 177  | 0.77     | 0.048667 |
| 264087_at   | At2g31330 | hypothetical protein predicted by de novo expressed protein                                            | 54   | 75   | 71   | 88   | 108  | 83   | 67   | 93   | 0.72     | 0.058641 | 38   | 36   | 57   | 51   | 45   | 43   | 42   | 56   | 44   | 47   | 0.93     | 0.581214 | 46   | 0.95     | 0.751591 |
| 264088_at   | At2g31340 | unknown protein                                                                                        | 94   | 133  | 117  | 146  | 181  | 142  | 115  | 156  | 0.73     | 0.068405 | 94   | 84   | 95   | 135  | 133  | 100  | 117  | 119  | 91   | 121  | 0.75     | 0.015163 | 123  | 0.74     | 0.055112 |
| 264089_at   | At2g31350 | protein deacetylase domain 6 // supported by full-length expressed protein                             | 56   | 63   | 78   | 87   | 108  | 68   | 518  | 779  | 0.67     | 0.033811 | 527  | 621  | 687  | 997  | 788  | 717  | 678  | 676  | 578  | 778  | 0.74     | 0.030738 | 832  | 0.68     | 0.030036 |
| 264089_at   | At2g31305 | Expressed protein // supported by full-length expressed protein                                        | 87   | 108  | 105  | 114  | 132  | 102  | 100  | 116  | 0.86     | 0.218736 | 100  | 108  | 106  | 144  | 132  | 103  | 104  | 106  | 104  | 118  | 0.89     | 0.235522 | 127  | 0.82     | 0.145649 |
| 264060_at   | At2g27980 | hypothetical protein predicted by de novo expressed protein                                            | 165  | 247  | 262  | 252  | 284  | 220  | 225  | 252  | 0.89     | 0.487267 | 142  | 108  | 140  | 187  | 163  | 136  | 169  | 169  | 130  | 165  | 0.79     | 0.044265 | 162  | 0.80     | 0.158810 |
| 264061_at   | At2g27970 | putative cyclin-dependent kinase reu1 cyclin-dependent kinase, putative / CDK                          | 880  | 875  | 813  | 1088 | 1131 | 973  | 789  | 1064 | 0.74     | 0.021176 | 908  | 881  | 997  | 1483 | 1159 | 1065 | 1077 | 972  | 929  | 1151 | 0.81     | 0.113773 | 1235 | 0.75     | 0.079618 |
| 264062_at   | At2g27960 | putative cyclin-dependent kinase reu1 cyclin-dependent kinase, putative / CDK                          | 105  | 115  | 108  | 115  | 138  | 88   | 98   | 114  | 0.86     | 0.433661 | 75   | 68   | 70   | 91   | 84   | 71   | 94   | 81   | 77   | 92   | 0.86     | 0.105544 | 84   | 0.84     | 0.069327 |
| 264063_at   | At2g27910 | unknown protein                                                                                        | 275  | 356  | 376  | 403  | 442  | 337  | 336  | 394  | 0.85     | 0.250349 | 273  | 218  | 293  | 361  | 325  | 264  | 283  | 302  | 261  | 307  | 0.85     | 0.151594 | 317  | 0.82     | 0.199235 |
| 264064_at   | At2g27900 | hypothetical protein predicted by de novo expressed protein                                            | 201  | 238  | 240  | 279  | 307  | 223  | 226  | 270  | 0.84     | 0.195116 | 217  | 135  | 169  | 200  | 174  | 135  | 174  | 161  | 154  | 169  | 0.91     | 0.366135 | 170  | 0.90     | 0.484170 |
| 264065_at   | At2g27890 | hypothetical protein predicted by de novo expressed protein                                            | 82   | 104  | 107  | 127  | 146  | 115  | 98   | 129  | 0.76     | 0.058520 | 54   | 57   | 68   | 56   | 66   | 53   | 65   | 62   | 59   | 60   | 0.98     | 0.819468 | 58   | 1.01     | 0.889311 |
| 264066_at   | At2g27880 | Argonaute (AGO)-like protein // argonaute protein, putative / AGO, outat                               | 1647 | 2177 | 2345 | 2462 | 2834 | 2164 | 2123 | 2493 | 0.85     | 0.031335 | 2018 | 1709 | 1960 | 2462 | 2158 | 1762 | 2340 | 2170 | 1696 | 2178 | 0.87     | 0.152079 | 2127 | 0.89     | 0.359548 |
| 264067_x_at | At2g28010 | putative chloroplast nucleoid DNA binding protein // putative chloroplast nucleoid DNA binding protein | 25   | 34   | 40   | 19   | 22   | 17   | 33   | 19   | 1.71     | 0.039844 | 69   | 88   | 78   | 14   | 10   | 13   | 15   | 14   | 78   | 13   | 0.58     | 0.000000 | 13   | 6.17     | 0.000253 |
| 264068_at   | At2g27990 | putative homeodomain transcription factor homeodomain-containing protein                               | 43   | 48   | 60   | 65   | 58   | 56   | 50   | 60   | 0.84     | 0.171676 | 44   | 40   | 54   | 52   | 47   | 43   | 55   | 51   | 46   | 50   | 0.93     | 0.445389 | 47   | 0.98     | 0.825904 |
| 264069_at   | At2g28000 | putative ribulose subunit binding protein Rubisco subunit binding protein alpha                        | 604  | 841  | 706  | 907  | 984  | 780  | 717  | 890  | 0.81     | 0.128808 | 683  | 633  | 791  | 906  | 792  | 673  | 770  | 766  | 702  | 782  | 0.90     | 0.204950 | 790  | 0.89     | 0.340876 |
| 264070_at   | At2g27960 | putative cyclin-dependent kinase reu1 cyclin-dependent kinase / CDK (CKS1)                             | 309  | 369  | 380  | 474  | 576  | 465  | 353  | 505  | 0.70     | 0.021666 | 434  | 473  | 479  | 721  | 589  | 582  | 602  | 568  | 462  | 606  | 0.76     | 0.012636 | 621  | 0.74     | 0.040227 |
| 264071_at   | At2g27920 | putative carboxypeptidase // supported by full-length expressed protein                                | 135  | 204  | 232  | 240  | 251  | 157  | 190  | 216  | 0.88     | 0.565888 | 181  | 144  | 166  | 221  | 181  | 183  | 220  | 201  | 164  | 201  | 0.82     | 0.036731 | 195  | 0.84     | 0.140238 |
| 264072_at   | At2g10750 | hypothetical protein                                                                                   | 13   | 16   | 15   | 17   | 21   | 18   | 15   | 19   | 0.79     | 0.038604 | 11   | 12   | 12   | 10   | 10   | 12   | 12   | 12   | 11   | 10.1 | 0.933209 | 11       | 1.09 | 0.265976 |          |
| 264073_at   | At2g10840 | putative replication protein A1 // gypsy-like retrotransposon family (Atheta)                          | 12   | 7    | 8    | 6    | 9    | 8    | 9    | 8    | 1.15     | 0.579890 | 4    | 6    | 6    | 3    | 5    | 6    | 8    | 6    | 5    | 6    | 0.97     | 0.891516 | 5    | 1.17     | 0.524219 |
| 264074_at   | At2g10780 | putative retroelement pol polyprotein // gypsy-like retrotransposon family // gyp                      | 8    | 6    | 7    | 11   | 9    | 9    | 7    | 7    | 1.0      | 0.051841 | 6    | 6    | 7    | 6    | 6    | 8    | 4    | 6    | 7    | 6    | 1.11     | 0.470379 | 6    | 1.01     | 0.933405 |
| 264075_at   | At2g10850 | envelope-like protein identical to GB-A1 envelope-like protein identical to GB-A1                      | 46   | 55   | 64   | 55   | 71   | 54   | 55   | 60   | 0.91     | 0.511077 | 41   | 54   | 44   | 48   | 41   | 48   | 53   | 50   | 46   | 48   | 0.97     | 0.708519 | 46   | 1.02     | 0.873484 |
| 264076_at   | At2g28540 | unknown protein                                                                                        | 327  | 440  | 432  | 453  | 516  | 383  | 400  | 451  | 0.89     | 0.391708 | 317  | 303  | 331  | 413  | 356  | 284  | 415  | 380  | 317  | 370  | 0.86     | 0.157425 | 351  | 0.90     | 0.421872 |
| 264077_at   | At2g28560 | putative RAD51B-like DNA repair protein expressed protein                                              | 76   | 85   | 98   | 100  | 76   | 84   | 92   | 91   | 0.81     | 0.411087 | 76   | 67   | 89   | 94   | 81   | 74   | 86   | 72   | 77   | 81   | 0.95     | 0.576079 | 83   | 0.93     | 0.539165 |
| 264078_at   | At2g28470 | putative beta-galactosidase // beta-galactosidase, putative / lactase, or                              | 529  | 836  | 508  | 1627 | 1556 | 1067 | 624  | 1417 | 0.44     | 0.018178 | 467  | 373  | 473  | 1195 | 1032 | 803  | 817  | 798  | 438  | 929  | 0.47     | 0.004075 | 1010 | 0.43     | 0.006440 |
| 264079_at   | At2g28490 | putative seed storage protein (vitilin) // cupin family protein                                        | 11   | 15   | 16   | 242  | 22   | 13   | 14   | 92   | 0.15     | 0.335734 | 15   | 13   | 13   | 16   | 16   | 15   | 15   | 14   | 15   | 15   | 0.94     | 0.360598 | 15   | 0.90     | 0.175884 |
| 264080_at   | At2g28520 | putative vacuolar protein ATPase subunit vacuolar protein ATPase, putative                             | 184  | 241  | 249  | 254  | 290  | 244  | 225  | 263  | 0.86     | 0.202272 | 125  | 99   | 112  | 131  | 110  | 101  | 136  | 120  | 112  | 120  | 0.94     | 0.476278 | 114  | 0.98     | 0.866344 |
| 264081_at   | At2g28530 | putative RING zinc finger transcription factor RNA recognition motif (RRM)-containing                  | 63   | 98   | 64   | 122  | 118  | 93   | 75   | 111  | 0.68     | 0.068447 | 29   | 26   | 28   | 33   | 27   | 27   | 30   | 25   | 28   | 29   | 0.97     | 0.657321 | 29   | 0.95     | 0.560131 |
| 264082_at   | At2g28570 | unknown protein // supported by full-length expressed protein                                          | 25   | 30   | 36   | 27   | 31   | 30   | 30   | 29   | 1.03     | 0.822656 | 32   | 31   | 32   | 30   | 21   | 27   | 30   | 30   | 32   | 27   | 1.15     | 0.144127 | 26   | 1.23     | 0.092781 |
| 264055_at   | At2g28590 | putative protein kinase containing a crotin protein kinase family protein                              | 80   | 94   | 113  | 112  | 122  | 91   | 86   | 108  | 0.88     | 0.348413 | 84   | 88   | 84   | 126  | 92   | 88   | 106  | 102  | 85   | 105  | 0.81     | 0.046369 | 106  | 0.81     | 0.130996 |
| 264056_at   | At2g28510 | putative CTF zinc finger protein // zinc finger protein domain-containing c                            | 128  | 157  | 160  | 231  | 206  | 128  | 157  | 160  | 0.62     | 0.023662 | 135  | 127  | 156  | 204  | 196  | 198  | 217  | 188  | 217  | 188  | 0.65     | 0.002001 | 208  | 0.64     | 0.007417 |
| 264057_at   | At2g28550 | putative AP2 domain transcription factor AP2 domain-containing transcription fac                       | 24   | 29   | 34   | 29   | 31   | 33   | 29   | 31   | 0.92     | 0.484135 | 21   | 27   | 27   | 22   | 27   | 22   | 21   | 20   | 25   | 22   | 1.12     | 0.277632 | 23   | 1.06     | 0.610650 |
| 264058_at   | At2g30360 | F-box protein, AtFBX7 containing F-box family protein (FBX7)                                           | 24   | 28   | 27   | 23   | 27   | 23   | 25   | 26   | 0.97     | 0.713883 | 205  | 25   | 27   | 24   | 27   | 22   | 28   | 20   | 24   | 24   | 0.98     | 0.866047 | 24   | 0.98     | 0.820085 |
| 264027_at   | At2g33670 | putative AAA-type ATPase similar to Cl AAA-type ATPase family protein                                  | 139  | 178  | 178  | 193  | 208  | 159  | 163  | 187  | 0.87     | 0.272550 | 135  | 126  | 140  | 219  | 174  | 151  | 190  | 164  | 134  | 179  | 0.74     | 0.027549 | 181  | 0.74     | 0.078020 |
| 264028_at   | At2g33680 | putative nitrilase associated protein A1b expressed protein                                            | 1160 | 1395 | 1625 | 1691 | 1453 | 1331 | 1243 | 1453 | 0.88     | 0.044870 | 1345 | 1470 | 1387 | 1488 | 1408 | 1855 | 1326 | 1408 | 1690 | 1855 | 0.83     | 0.096302 | 1686 | 0.86     | 0.267728 |
| 264029_at   | At2g33720 | unknown protein                                                                                        | 10   | 12   | 20   | 19   | 26   | 16   | 22   | 0.72 | 0.271966 | 10       | 11   | 14   | 13   | 8    | 9    | 8    | 12   | 9    | 126  | 0.17 | 0.171175 | 10       | 1.18 | 0.425943 |          |
| 264030_at   | At2g33770 | putative sterol sulfotransferase // sulfotransferase family protein                                    | 28   | 29   | 32   | 30   | 32   | 30   | 30   | 31   | 0.96     | 0.493228 | 26   | 27   | 29   | 27   | 28   | 19   | 32   | 25   | 27   | 26   | 1.04     | 0.757020 | 25   | 1.10     | 0.437806 |
| 264031_at   | At2g33780 | unknown protein                                                                                        | 197  | 279  | 289  | 343  | 406  | 284  | 255  | 344  | 0.74     | 0.121366 | 328  | 308  | 329  | 509  | 422  | 408  | 308  | 308  | 322  | 391  | 0.82     | 0.223305 | 446  | 0.72     | 0.018771 |
| 264032_at   | At2g33810 | putative sterol sulfotransferase // sulfotransferase family protein                                    | 175  | 207  | 204  | 234  | 266  | 213  | 195  | 237  | 0.82     | 0.083027 | 215  | 229  | 230  | 326  | 223  | 226  | 223  | 226  | 221  | 246  | 0.80     | 0.388271 | 238  | 0.86     | 0.336421 |
| 264033_at   | At2g33580 | hypothetical protein predicted by de novo expressed protein-related                                    | 45   | 50   | 52   | 51   | 53   | 48   | 52   | 0.92 | 0.057645 | 33       | 37   | 43   | 42   | 40   | 33   | 40   | 37   | 38   | 38   | 0.98 | 0.836648 | 38       | 0.99 | 0.896057 |          |
| 264034_x_at | At2g33600 | unknown protein                                                                                        | 32   | 40   | 44   | 41   | 43   | 46   | 39   | 43   | 0.89     | 0.279021 | 37   | 35   | 37   | 44   | 39   | 38   | 51   | 38   | 36   | 42   | 0.86     | 0.142993 | 40   | 0.90     | 0.082749 |
| 264038_at   | At2g33630 | hypothetical protein predicted by de novo expressed protein                                            | 17   | 21   | 22   | 23   | 18   | 23   | 19   | 21   | 0.87     | 0.312457 | 15   | 10   | 17   | 13   | 12   | 16   | 13   | 14   | 14   | 14   | 1.00     | 0.983668 | 14   | 1.00     | 0.994701 |
| 264038_at   | At2g33810 | hypothetical protein similar to hsp70h1 // hsp70h1-like protein                                        | 187  | 215  | 257  | 215  | 257  | 204  | 218  | 225  | 0.87     | 0.178555 | 249  | 271  | 269  | 259  | 225  | 195  | 209  | 221  | 273  | 228  | 1.23     | 0.022518 | 226  | 1.21     | 0.116406 |
| 264037_at   | At2g33750 | putative sterol sulfotransferase // sulfotransferase family protein                                    | 97   | 161  | 148  | 146  | 137  | 106  | 135  | 130  | 1.04     | 0.815756 | 161  | 170  | 152  | 171  | 180  | 226  | 212  | 171  | 206  | 206  | 0.82     | 0.050477 | 202  | 0.85     | 0.307468 |
| 264038_at   | At2g33690 | putative ubiquitinome biosynthesis protein coenzyme Q biosynthesis Coq4 family p                       | 160  | 232  | 552  | 664  | 521  | 482  | 579  | 0.83 | 0.215395 | 512      | 523  | 580  | 749  | 660  | 578  | 589  | 586  | 538  | 633  | 633  | 0.85     | 0.087861 | 662  | 0.81     | 0.082470 |
| 264039_at   | At2g33740 | putative cold-regulated protein // support late embryogenesis abundant domain- $\alpha$                | 28   | 36   | 36   | 30   | 33   | 37   | 33   | 33   | 0.99     | 0.947340 | 28   | 31   | 28   | 31   | 28   | 31   | 30   | 26   | 28   | 32   | 0.98     | 0.741412 | 29   | 0.99     | 0.892722 |
| 264040_at   | At2g33730 | putative undr1v1 transferase // support ACT domain-containing protein (ACRS)                           | 115  | 158  | 185  | 213  | 211  | 161  | 153  | 195  | 0.78     | 0.188810 | 145  | 133  | 163  | 267  | 202  | 168  | 186  | 176  | 147  | 200  | 0.73     | 0.072694 | 212  | 0.69     | 0.064642 |
| 264041_at   | At2g33510 | MADS-box protein (AGL3) // supported MADS-box protein (AGL3)                                           | 19   | 40   | 29   | 26   | 30   | 19   | 20   | 30   | 0.77     | 0.076144 | 20   | 18   | 23   | 25   | 23   | 21   | 22   | 21   | 23   | 21   | 0.92     | 0.173230 | 25   | 0.90     | 0.307468 |
| 264042_at   | At2g33760 | putative sterol sulfotransferase // succinate oxidoreductase, putative                                 | 31   | 40   | 51   | 42   | 47   | 36   | 41   | 42   | 0.98     | 0.930333 | 41   | 42   | 42   | 42   | 45   | 39   | 39   | 47   | 47   | 42   | 0.95     |          |      |          |          |









|             |           |                                                                                   |     |     |     |     |     |     |     |      |          |          |     |     |      |     |      |     |     |     |     |      |          |          |          |          |          |          |
|-------------|-----------|-----------------------------------------------------------------------------------|-----|-----|-----|-----|-----|-----|-----|------|----------|----------|-----|-----|------|-----|------|-----|-----|-----|-----|------|----------|----------|----------|----------|----------|----------|
| 263601_s_at | A12g16370 | dihydrofolate reductase-thymidylate svr bifunctional dihydrofolate reductase-thyr | 192 | 279 | 297 | 309 | 328 | 269 | 256 | 302  | 0.85     | 0.277337 | 157 | 146 | 200  | 223 | 183  | 155 | 189 | 179 | 168 | 186  | 0.90     | 0.381893 | 187      | 0.90     | 0.503632 |          |
| 263602_at   | A12g16360 | 40S ribosomal protein S25                                                         | 43  | 57  | 80  | 74  | 76  | 68  | 60  | 72   | 0.83     | 0.335704 | 28  | 31  | 41   | 47  | 31   | 35  | 38  | 44  | 34  | 39   | 0.86     | 0.305897 | 38       | 0.89     | 0.553167 |          |
| 263603_at   | A12g16340 | hypothetical protein                                                              | 67  | 75  | 112 | 97  | 111 | 106 | 85  | 105  | 0.81     | 0.236808 | 43  | 44  | 51   | 47  | 43   | 51  | 74  | 62  | 46  | 56   | 0.83     | 0.270358 | 47       | 0.98     | 0.788368 |          |
| 263604_s_at | A12g16330 | hypothetical protein                                                              | 7   | 8   | 7   | 6   | 11  | 8   | 6   | 7    | 0.78     | 0.174722 | 10  | 10  | 7    | 5   | 5    | 6   | 4   | 7   | 9   | 5    | 1.56     | 0.174722 | 6        | 0.98     | 0.194915 |          |
| 263605_at   | A12g16480 | hypothetical protein predicted by oensc                                           | 235 | 290 | 261 | 394 | 397 | 364 | 262 | 385  | 0.68     | 0.002932 | 199 | 180 | 218  | 282 | 218  | 224 | 231 | 199 | 227 | 227  | 0.88     | 0.265196 | 227      | 0.88     | 0.419526 |          |
| 263606_at   | A12g16280 | putative beta-ketoacyl-CoA synthase                                               | 442 | 544 | 444 | 572 | 584 | 451 | 484 | 536  | 0.90     | 0.373077 | 412 | 327 | 395  | 616 | 520  | 446 | 475 | 500 | 378 | 511  | 0.74     | 0.021119 | 527      | 0.72     | 0.055212 |          |
| 263607_at   | A12g16270 | unknown protein predicted by oensc                                                | 462 | 566 | 227 | 253 | 284 | 207 | 238 | 248  | 0.96     | 0.736317 | 159 | 126 | 174  | 202 | 170  | 156 | 168 | 161 | 153 | 171  | 0.89     | 0.284065 | 176      | 0.87     | 0.312125 |          |
| 263608_at   | A12g16260 | putative glycine-rich RNA-binding protein                                         | 60  | 73  | 102 | 113 | 123 | 100 | 73  | 102  | 0.67     | 0.132627 | 56  | 100 | 79   | 103 | 63   | 78  | 82  | 78  | 81  | 82   | 0.78     | 0.075040 | 74       | 0.86     | 0.194915 |          |
| 263609_at   | A12g16250 | putative LRR receptor protein kinase                                              | 93  | 119 | 141 | 124 | 134 | 119 | 118 | 125  | 0.94     | 0.638456 | 118 | 112 | 127  | 135 | 124  | 112 | 132 | 126 | 119 | 126  | 0.95     | 0.323005 | 124      | 0.96     | 0.603310 |          |
| 263610_at   | A12g16230 | putative beta-1,3-glucanase                                                       | 32  | 43  | 45  | 41  | 48  | 43  | 40  | 44   | 0.92     | 0.479288 | 35  | 28  | 40   | 28  | 29   | 32  | 33  | 27  | 34  | 30   | 1.14     | 0.199061 | 30       | 1.14     | 0.300761 |          |
| 263611_at   | A12g16450 | hypothetical protein predicted by oensc                                           | 129 | 20  | 27  | 22  | 23  | 26  | 22  | 24   | 0.95     | 0.672758 | 19  | 17  | 24   | 18  | 15   | 19  | 21  | 16  | 20  | 18   | 1.12     | 0.350557 | 17       | 1.14     | 0.369597 |          |
| 263612_s_at | A12g16440 | putative CDC21 protein                                                            | 502 | 489 | 498 | 631 | 580 | 553 | 500 | 588  | 0.85     | 0.347931 | 371 | 313 | 430  | 497 | 415  | 347 | 401 | 384 | 371 | 409  | 0.91     | 0.401338 | 419      | 0.89     | 0.430917 |          |
| 263613_at   | A12g16430 | putative purple acid phosphatase                                                  | 90  | 129 | 102 | 152 | 148 | 106 | 107 | 135  | 0.79     | 0.200466 | 86  | 87  | 85   | 161 | 100  | 103 | 88  | 91  | 86  | 109  | 0.79     | 0.259181 | 122      | 0.71     | 0.146251 |          |
| 263614_at   | A12g16410 | putative Tat1-like non-LTR retroelement                                           | 63  | 62  | 77  | 73  | 70  | 73  | 68  | 72   | 0.94     | 0.443920 | 68  | 74  | 79   | 79  | 77   | 89  | 97  | 86  | 73  | 84   | 0.88     | 0.147254 | 82       | 0.90     | 0.184621 |          |
| 263615_at   | A12g16400 | unknown protein                                                                   | 185 | 228 | 209 | 286 | 296 | 234 | 207 | 272  | 0.76     | 0.048043 | 211 | 187 | 223  | 343 | 257  | 233 | 235 | 212 | 207 | 256  | 0.81     | 0.167715 | 278      | 0.74     | 0.111290 |          |
| 263616_at   | A12g16350 | hypothetical protein predicted by oensc                                           | 86  | 134 | 143 | 92  | 135 | 86  | 121 | 104  | 1.16     | 0.158405 | 122 | 114 | 99   | 132 | 108  | 116 | 149 | 141 | 112 | 129  | 0.87     | 0.174164 | 119      | 0.94     | 0.521583 |          |
| 263617_at   | A12g16990 | putative homeodomain transcription fac                                            | 247 | 320 | 312 | 337 | 384 | 277 | 293 | 333  | 0.88     | 0.363614 | 352 | 342 | 416  | 360 | 504  | 433 | 385 | 457 | 416 | 439  | 0.80     | 0.017789 | 440      | 0.80     | 0.064229 |          |
| 263618_at   | A12g16380 | putative oshosha1dlnos10/oshosha1                                                 | 21  | 26  | 33  | 23  | 25  | 24  | 29  | 85   | 0.204512 | 17       | 20  | 21  | 20   | 21  | 19   | 18  | 21  | 23  | 19  | 20   | 0.93     | 0.396940 | 19       | 0.99     | 0.920265 |          |
| 263619_at   | A12g15380 | putative non-LTR retroelement reverse                                             | 32  | 28  | 33  | 37  | 32  | 29  | 31  | 32   | 0.96     | 0.654750 | 24  | 28  | 34   | 23  | 20   | 23  | 27  | 28  | 29  | 24   | 1.19     | 0.153690 | 22       | 1.31     | 0.088885 |          |
| 263620_at   | A12g15370 | unknown protein                                                                   | 15  | 17  | 21  | 19  | 21  | 20  | 18  | 20   | 0.87     | 0.285071 | 19  | 19  | 22   | 24  | 19   | 20  | 17  | 13  | 20  | 19   | 1.07     | 0.604040 | 21       | 0.95     | 0.615806 |          |
| 263621_at   | A12g15360 | unknown protein                                                                   | 3   | 4   | 4   | 4   | 4   | 3   | 4   | 4    | 1.02     | 0.932379 | 7   | 4   | 4    | 4   | 3    | 5   | 5   | 3   | 5   | 4    | 1.22     | 0.399704 | 4        | 1.20     | 0.552523 |          |
| 263622_at   | A12g15420 | hypothetical protein predicted by oensc                                           | 27  | 42  | 53  | 41  | 53  | 46  | 41  | 46   | 0.88     | 0.158688 | 32  | 27  | 37   | 36  | 25   | 31  | 44  | 36  | 32  | 34   | 0.93     | 0.607257 | 31       | 1.04     | 0.802765 |          |
| 263623_at   | A12g15410 | putative retroelement pol polyprotein                                             | 19  | 19  | 21  | 19  | 21  | 21  | 20  | 20   | 0.96     | 0.420222 | 16  | 20  | 22   | 21  | 18   | 17  | 21  | 17  | 19  | 19   | 1.01     | 0.884953 | 19       | 1.03     | 0.785720 |          |
| 263624_s_at | A12g15400 | DNA-directed RNA polymerase II                                                    | 630 | 647 | 700 | 813 | 848 | 715 | 626 | 779  | 0.803433 | 716      | 695 | 791 | 1144 | 934 | 788  | 915 | 852 | 734 | 926 | 0.79 | 0.059042 | 965      | 0.77     | 0.107965 |          |          |
| 263625_at   | A12g15390 | unknown protein                                                                   | 18  | 19  | 23  | 21  | 25  | 22  | 20  | 23   | 0.88     | 0.247757 | 19  | 15  | 23   | 21  | 16   | 17  | 21  | 20  | 19  | 19   | 0.99     | 0.938440 | 18       | 1.04     | 0.804868 |          |
| 263626_at   | A12g15340 | hypothetical protein predicted by oensc                                           | 25  | 24  | 39  | 29  | 24  | 26  | 29  | 26   | 1.10     | 0.612695 | 20  | 19  | 21   | 16  | 16   | 13  | 19  | 22  | 20  | 17   | 1.17     | 0.232737 | 15       | 1.35     | 0.008718 |          |
| 263627_at   | A12g15440 | hypothetical protein predicted by oensc                                           | 60  | 64  | 79  | 76  | 69  | 70  | 68  | 72   | 0.94     | 0.530380 | 35  | 36  | 46   | 50  | 43   | 44  | 48  | 44  | 39  | 46   | 0.85     | 0.068481 | 46       | 0.85     | 0.169337 |          |
| 263628_at   | A12g27160 | hypothetical protein predicted by oensc                                           | 25  | 26  | 35  | 25  | 34  | 30  | 28  | 30   | 0.96     | 0.769780 | 20  | 18  | 20   | 18  | 20   | 20  | 21  | 19  | 19  | 19   | 1.00     | 0.947858 | 19       | 1.01     | 0.837501 |          |
| 263629_at   | A12g27170 | putative chromosome associated                                                    | 117 | 198 | 138 | 211 | 220 | 157 | 151 | 196  | 0.77     | 0.224916 | 65  | 52  | 57   | 91  | 73   | 61  | 61  | 69  | 58  | 71   | 0.82     | 0.156185 | 75       | 0.77     | 0.150636 |          |
| 263630_at   | A12g27150 | putative histone H3                                                               | 58  | 70  | 97  | 72  | 83  | 73  | 70  | 108  | 0.873233 | 70       | 100 | 73  | 101  | 86  | 79   | 100 | 79  | 101 | 86  | 79   | 0.79     | 0.148577 | 79       | 0.86     | 0.616834 |          |
| 263631_at   | A12g17050 | putative disease resistance protein                                               | 7   | 6   | 10  | 10  | 7   | 9   | 8   | 9    | 0.92     | 0.694265 | 9   | 11  | 7    | 7   | 8    | 7   | 11  | 6   | 9   | 8    | 1.13     | 0.534244 | 7        | 1.21     | 0.312307 |          |
| 263632_at   | A12g17060 | putative disease resistance protein                                               | 12  | 17  | 14  | 14  | 15  | 14  | 15  | 0.97 | 0.801946 | 13       | 12  | 14  | 19   | 12  | 11   | 16  | 9   | 13  | 13  | 0.98 | 0.918779 | 14       | 0.94     | 0.732457 |          |          |
| 263633_at   | A12g17150 | unknown protein similar to A. thaliana                                            | 84  | 107 | 111 | 133 | 157 | 112 | 100 | 134  | 0.75     | 0.059642 | 106 | 99  | 109  | 172 | 132  | 114 | 140 | 133 | 105 | 138  | 0.76     | 0.040884 | 139      | 0.75     | 0.120485 |          |
| 263634_at   | A12g16980 | putative tetradicline transceptor                                                 | 63  | 78  | 63  | 79  | 76  | 63  | 39  | 72   | 0.54     | 0.681731 | 61  | 62  | 61   | 102 | 75   | 80  | 83  | 92  | 61  | 80   | 0.69     | 0.005314 | 86       | 0.71     | 0.040372 |          |
| 263635_at   | A12g17070 | hypothetical protein similar to hypo                                              | 16  | 13  | 14  | 21  | 18  | 19  | 14  | 19   | 0.75     | 0.019048 | 16  | 14  | 15   | 15  | 17   | 12  | 18  | 15  | 15  | 15   | 1.00     | 0.974911 | 14       | 1.06     | 0.627452 |          |
| 263636_at   | A12g17080 | hypothetical protein similar to hypo                                              | 10  | 9   | 14  | 12  | 13  | 16  | 11  | 13   | 0.80     | 0.252480 | 7   | 8   | 11   | 13  | 10   | 11  | 9   | 9   | 11  | 0.81 | 0.162621 | 11       | 0.77     | 0.155452 |          |          |
| 263637_at   | A12g17090 | putative protein kinase identical to                                              | 28  | 30  | 34  | 40  | 39  | 31  | 40  | 0.77 | 0.005417 | 25       | 25  | 26  | 26   | 24  | 26   | 28  | 26  | 25  | 26  | 0.98 | 0.624918 | 25       | 1.00     | 0.904732 |          |          |
| 263638_at   | A12g17020 | F-box protein family, AIFBL10                                                     | 91  | 124 | 138 | 134 | 150 | 127 | 117 | 135  | 0.85     | 0.330273 | 86  | 70  | 94   | 96  | 94   | 86  | 92  | 83  | 91  | 92   | 0.82     | 0.390507 | 88       | 0.86     | 0.695238 |          |
| 263639_at   | A12g17030 | hypothetical protein similar to hypo                                              | 98  | 148 | 142 | 166 | 186 | 148 | 129 | 167  | 0.77     | 0.124436 | 113 | 107 | 128  | 155 | 126  | 121 | 120 | 109 | 116 | 126  | 0.92     | 0.400724 | 134      | 0.86     | 0.214607 |          |
| 263640_at   | A12g17140 | hypothetical protein similar to hypo                                              | 20  | 25  | 27  | 29  | 35  | 27  | 24  | 30   | 0.79     | 0.116571 | 22  | 22  | 29   | 26  | 25   | 22  | 25  | 19  | 24  | 23   | 1.03     | 0.761416 | 24       | 1.00     | 0.968028 |          |
| 263641_at   | A12g17160 | hypothetical protein identical to hypo                                            | 20  | 20  | 27  | 22  | 26  | 29  | 22  | 26   | 0.86     | 0.318100 | 14  | 19  | 16   | 17  | 14   | 21  | 22  | 16  | 18  | 18   | 0.92     | 0.543871 | 16       | 1.05     | 0.640805 |          |
| 263642_at   | A12g17120 | unknown protein similar to hypo                                                   | 512 | 588 | 668 | 612 | 703 | 553 | 591 | 623  | 0.85     | 0.533041 | 659 | 663 | 591  | 716 | 1010 | 793 | 784 | 854 | 809 | 679  | 850      | 0.80     | 0.024385 | 862      | 0.79     | 0.073761 |
| 263643_at   | A12g17130 | putative NAD+ dependent isocitrate                                                | 205 | 254 | 269 | 283 | 240 | 243 | 293 | 313  | 0.86     | 0.210063 | 241 | 266 | 238  | 276 | 283  | 275 | 258 | 243 | 263 | 283  | 0.82     | 0.127322 | 283      | 0.77     | 0.082003 |          |
| 263644_at   | A12g17040 | NAM (no apical meristem)-like                                                     | 16  | 15  | 16  | 13  | 18  | 17  | 16  | 16   | 0.98     | 0.861382 | 17  | 19  | 14   | 11  | 14   | 13  | 13  | 11  | 17  | 12   | 1.35     | 0.018679 | 13       | 1.31     | 0.077864 |          |
| 263645_at   | A12g17033 | Expressed protein ; supported by                                                  | 101 | 146 | 135 | 142 | 157 | 127 | 142 | 0.89 | 0.400366 | 103      | 116 | 118 | 143  | 130 | 137  | 134 | 128 | 112 | 134 | 0.84 | 0.004102 | 137      | 0.82     | 0.014882 |          |          |
| 263646_at   | A12g17110 | hypothetical protein contains NLS                                                 | 58  | 79  | 95  | 89  | 96  | 74  | 78  | 87   | 0.90     | 0.506891 | 59  | 63  | 63   | 83  | 62   | 70  | 66  | 65  | 61  | 69   | 0.88     | 0.160502 | 72       | 0.85     | 0.168421 |          |
| 263647_s_at | A12g24980 | unknown protein                                                                   | 44  | 42  | 61  | 52  | 45  | 40  | 49  | 46   | 1.08     | 0.641334 | 62  | 57  | 65   | 68  | 62   | 64  | 67  | 62  | 64  | 68   | 0.92     | 0.420311 | 64       | 0.96     | 0.058042 |          |
| 263648_at   | A12g24960 | hypothetical protein predicted by oensc                                           | 70  | 96  | 104 | 104 | 109 | 98  | 90  | 104  | 0.87     | 0.261081 | 70  | 73  | 81   | 90  | 76   | 70  | 87  | 83  | 75  | 81   | 0.92     | 0.267940 | 79       | 0.95     | 0.577834 |          |
| 263649_at   | A12g24950 | hypothetical protein                                                              | 50  | 54  | 73  | 72  | 72  | 70  | 59  | 71   | 0.83     | 0.162327 | 40  | 34  | 54   | 44  | 43   | 44  | 51  | 46  | 42  | 46   | 0.93     | 0.521927 | 44       | 0.97     | 0.829498 |          |
| 263650_at   | A12g24930 | hypothetical protein predicted by oensc                                           | 9   | 12  | 12  | 14  | 11  | 15  | 15  | 0.73 | 0.017451 | 10       | 12  | 8   | 13   | 8   | 13   | 8   | 12  | 10  | 10  | 10   | 0.96     | 0.815465 | 9        | 1.04     | 0.875878 |          |
| 263651_s_at | A12g24920 | hypothetical protein predicted by oensc                                           |     |     |     |     |     |     |     |      |          |          |     |     |      |     |      |     |     |     |     |      |          |          |          |          |          |          |





































|             |           |                                                                                                                                                                                                                                                                                                                                                                                                                                                                                                                                                                                                                                                                                                                                                                                                                                                                                                                                                                                                                                                                                                                                                                                                                                                                                                                                                                                                                                                                                                                                                                                                                                                                                                                                                                                                                                                                                                                                                                                                                                                                                                                                                                                                                                                                                                                                                                                                                                                                                                                                                                                                                                                                                                                                                                                                                                                                                                                                                                                                                                                                                                                                                                                                                                                                                                                                                                                                                                                                                                                                                                                                                                                                                                                                                                                                                                                                                                                                                                                                                                                                                                                                                                                                                                                                                                                                                                                                                                                                                                                                                                                                                                                                                                                                                                                                                                                                                                                                                                                                                                                                                                                                                                                                                                                                                                                                                                                                                                                                                                                                                                                                                                                                                                                                                                                                                                                                                                                                                                                                                                                                                                                                                                                                                                                                                                                                                                                                                                                                                                                                                                                                                                                                                                                                                                                                                                                                                                                                                                                                                                                                                                                                                                                                                                                                                                                                                                                                                                                                                                                                                                                                                                                                                                                                                                                                                                                                                                                                                                                                                                                                                                                                                                                                                                                                                                                                                                                                                                                                                                                                                                                                                                                                                                                                                                                                                                                                                                                                                                                                                                                                                                                                                                                                                                                                                                                                                                                                                                                                                                                                                                                                                                        |     |      |      |      |      |      |      |      |      |          |      |      |      |      |      |      |      |      |      |      |      |          |      |      |          |
|-------------|-----------|----------------------------------------------------------------------------------------------------------------------------------------------------------------------------------------------------------------------------------------------------------------------------------------------------------------------------------------------------------------------------------------------------------------------------------------------------------------------------------------------------------------------------------------------------------------------------------------------------------------------------------------------------------------------------------------------------------------------------------------------------------------------------------------------------------------------------------------------------------------------------------------------------------------------------------------------------------------------------------------------------------------------------------------------------------------------------------------------------------------------------------------------------------------------------------------------------------------------------------------------------------------------------------------------------------------------------------------------------------------------------------------------------------------------------------------------------------------------------------------------------------------------------------------------------------------------------------------------------------------------------------------------------------------------------------------------------------------------------------------------------------------------------------------------------------------------------------------------------------------------------------------------------------------------------------------------------------------------------------------------------------------------------------------------------------------------------------------------------------------------------------------------------------------------------------------------------------------------------------------------------------------------------------------------------------------------------------------------------------------------------------------------------------------------------------------------------------------------------------------------------------------------------------------------------------------------------------------------------------------------------------------------------------------------------------------------------------------------------------------------------------------------------------------------------------------------------------------------------------------------------------------------------------------------------------------------------------------------------------------------------------------------------------------------------------------------------------------------------------------------------------------------------------------------------------------------------------------------------------------------------------------------------------------------------------------------------------------------------------------------------------------------------------------------------------------------------------------------------------------------------------------------------------------------------------------------------------------------------------------------------------------------------------------------------------------------------------------------------------------------------------------------------------------------------------------------------------------------------------------------------------------------------------------------------------------------------------------------------------------------------------------------------------------------------------------------------------------------------------------------------------------------------------------------------------------------------------------------------------------------------------------------------------------------------------------------------------------------------------------------------------------------------------------------------------------------------------------------------------------------------------------------------------------------------------------------------------------------------------------------------------------------------------------------------------------------------------------------------------------------------------------------------------------------------------------------------------------------------------------------------------------------------------------------------------------------------------------------------------------------------------------------------------------------------------------------------------------------------------------------------------------------------------------------------------------------------------------------------------------------------------------------------------------------------------------------------------------------------------------------------------------------------------------------------------------------------------------------------------------------------------------------------------------------------------------------------------------------------------------------------------------------------------------------------------------------------------------------------------------------------------------------------------------------------------------------------------------------------------------------------------------------------------------------------------------------------------------------------------------------------------------------------------------------------------------------------------------------------------------------------------------------------------------------------------------------------------------------------------------------------------------------------------------------------------------------------------------------------------------------------------------------------------------------------------------------------------------------------------------------------------------------------------------------------------------------------------------------------------------------------------------------------------------------------------------------------------------------------------------------------------------------------------------------------------------------------------------------------------------------------------------------------------------------------------------------------------------------------------------------------------------------------------------------------------------------------------------------------------------------------------------------------------------------------------------------------------------------------------------------------------------------------------------------------------------------------------------------------------------------------------------------------------------------------------------------------------------------------------------------------------------------------------------------------------------------------------------------------------------------------------------------------------------------------------------------------------------------------------------------------------------------------------------------------------------------------------------------------------------------------------------------------------------------------------------------------------------------------------------------------------------------------------------------------------------------------------------------------------------------------------------------------------------------------------------------------------------------------------------------------------------------------------------------------------------------------------------------------------------------------------------------------------------------------------------------------------------------------------------------------------------------------------------------------------------------------------------------------------------------------------------------------------------------------------------------------------------------------------------------------------------------------------------------------------------------------------------------------------------------------------------------------------------------------------------------------------------------------------------------------------------------------------------------------------------------------------------------------------------------------------------------------------------------------------------------------------------------------------------------------------------------------------------------------------------------------------------------------------------------------------------------------------------------------------------------------------------------------------------------------------------------------------------------------------------------------------------------------------------------------------------|-----|------|------|------|------|------|------|------|------|----------|------|------|------|------|------|------|------|------|------|------|------|----------|------|------|----------|
| 261736_at   | At1g47810 | hypothetical protein similar to hypothetical F-box family protein                                                                                                                                                                                                                                                                                                                                                                                                                                                                                                                                                                                                                                                                                                                                                                                                                                                                                                                                                                                                                                                                                                                                                                                                                                                                                                                                                                                                                                                                                                                                                                                                                                                                                                                                                                                                                                                                                                                                                                                                                                                                                                                                                                                                                                                                                                                                                                                                                                                                                                                                                                                                                                                                                                                                                                                                                                                                                                                                                                                                                                                                                                                                                                                                                                                                                                                                                                                                                                                                                                                                                                                                                                                                                                                                                                                                                                                                                                                                                                                                                                                                                                                                                                                                                                                                                                                                                                                                                                                                                                                                                                                                                                                                                                                                                                                                                                                                                                                                                                                                                                                                                                                                                                                                                                                                                                                                                                                                                                                                                                                                                                                                                                                                                                                                                                                                                                                                                                                                                                                                                                                                                                                                                                                                                                                                                                                                                                                                                                                                                                                                                                                                                                                                                                                                                                                                                                                                                                                                                                                                                                                                                                                                                                                                                                                                                                                                                                                                                                                                                                                                                                                                                                                                                                                                                                                                                                                                                                                                                                                                                                                                                                                                                                                                                                                                                                                                                                                                                                                                                                                                                                                                                                                                                                                                                                                                                                                                                                                                                                                                                                                                                                                                                                                                                                                                                                                                                                                                                                                                                                                                                                      | 14  | 11   | 17   | 13   | 16   | 15   | 14   | 15   | 0.95 | 0.736728 | 10   | 13   | 18   | 11   | 12   | 13   | 16   | 15   | 14   | 13   | 1.02 | 0.926114 | 12   | 1.13 | 0.563634 |
| 261737_at   | At1g47885 | hypothetical protein similar to putative c leucine-rich repeat family protein                                                                                                                                                                                                                                                                                                                                                                                                                                                                                                                                                                                                                                                                                                                                                                                                                                                                                                                                                                                                                                                                                                                                                                                                                                                                                                                                                                                                                                                                                                                                                                                                                                                                                                                                                                                                                                                                                                                                                                                                                                                                                                                                                                                                                                                                                                                                                                                                                                                                                                                                                                                                                                                                                                                                                                                                                                                                                                                                                                                                                                                                                                                                                                                                                                                                                                                                                                                                                                                                                                                                                                                                                                                                                                                                                                                                                                                                                                                                                                                                                                                                                                                                                                                                                                                                                                                                                                                                                                                                                                                                                                                                                                                                                                                                                                                                                                                                                                                                                                                                                                                                                                                                                                                                                                                                                                                                                                                                                                                                                                                                                                                                                                                                                                                                                                                                                                                                                                                                                                                                                                                                                                                                                                                                                                                                                                                                                                                                                                                                                                                                                                                                                                                                                                                                                                                                                                                                                                                                                                                                                                                                                                                                                                                                                                                                                                                                                                                                                                                                                                                                                                                                                                                                                                                                                                                                                                                                                                                                                                                                                                                                                                                                                                                                                                                                                                                                                                                                                                                                                                                                                                                                                                                                                                                                                                                                                                                                                                                                                                                                                                                                                                                                                                                                                                                                                                                                                                                                                                                                                                                                                          | 21  | 24   | 31   | 28   | 29   | 27   | 25   | 28   | 0.91 | 0.469035 | 21   | 25   | 23   | 20   | 18   | 22   | 21   | 18   | 23   | 20   | 1.18 | 0.037558 | 20   | 1.15 | 0.117289 |
| 261738_s_at | At1g47820 | hypothetical protein identical to hvocthe expressed protein                                                                                                                                                                                                                                                                                                                                                                                                                                                                                                                                                                                                                                                                                                                                                                                                                                                                                                                                                                                                                                                                                                                                                                                                                                                                                                                                                                                                                                                                                                                                                                                                                                                                                                                                                                                                                                                                                                                                                                                                                                                                                                                                                                                                                                                                                                                                                                                                                                                                                                                                                                                                                                                                                                                                                                                                                                                                                                                                                                                                                                                                                                                                                                                                                                                                                                                                                                                                                                                                                                                                                                                                                                                                                                                                                                                                                                                                                                                                                                                                                                                                                                                                                                                                                                                                                                                                                                                                                                                                                                                                                                                                                                                                                                                                                                                                                                                                                                                                                                                                                                                                                                                                                                                                                                                                                                                                                                                                                                                                                                                                                                                                                                                                                                                                                                                                                                                                                                                                                                                                                                                                                                                                                                                                                                                                                                                                                                                                                                                                                                                                                                                                                                                                                                                                                                                                                                                                                                                                                                                                                                                                                                                                                                                                                                                                                                                                                                                                                                                                                                                                                                                                                                                                                                                                                                                                                                                                                                                                                                                                                                                                                                                                                                                                                                                                                                                                                                                                                                                                                                                                                                                                                                                                                                                                                                                                                                                                                                                                                                                                                                                                                                                                                                                                                                                                                                                                                                                                                                                                                                                                                                            | 181 | 215  | 243  | 230  | 224  | 211  | 213  | 222  | 0.96 | 0.666127 | 303  | 293  | 331  | 409  | 329  | 307  | 355  | 343  | 309  | 349  | 0.89 | 0.154832 | 348  | 0.89 | 0.301938 |
| 261739_at   | At1g47750 | hypothetical protein similar to hvocthe expressed protein                                                                                                                                                                                                                                                                                                                                                                                                                                                                                                                                                                                                                                                                                                                                                                                                                                                                                                                                                                                                                                                                                                                                                                                                                                                                                                                                                                                                                                                                                                                                                                                                                                                                                                                                                                                                                                                                                                                                                                                                                                                                                                                                                                                                                                                                                                                                                                                                                                                                                                                                                                                                                                                                                                                                                                                                                                                                                                                                                                                                                                                                                                                                                                                                                                                                                                                                                                                                                                                                                                                                                                                                                                                                                                                                                                                                                                                                                                                                                                                                                                                                                                                                                                                                                                                                                                                                                                                                                                                                                                                                                                                                                                                                                                                                                                                                                                                                                                                                                                                                                                                                                                                                                                                                                                                                                                                                                                                                                                                                                                                                                                                                                                                                                                                                                                                                                                                                                                                                                                                                                                                                                                                                                                                                                                                                                                                                                                                                                                                                                                                                                                                                                                                                                                                                                                                                                                                                                                                                                                                                                                                                                                                                                                                                                                                                                                                                                                                                                                                                                                                                                                                                                                                                                                                                                                                                                                                                                                                                                                                                                                                                                                                                                                                                                                                                                                                                                                                                                                                                                                                                                                                                                                                                                                                                                                                                                                                                                                                                                                                                                                                                                                                                                                                                                                                                                                                                                                                                                                                                                                                                                                              | 161 | 219  | 247  | 235  | 230  | 216  | 219  | 240  | 0.79 | 0.134446 | 303  | 293  | 331  | 409  | 329  | 307  | 355  | 343  | 309  | 349  | 0.89 | 0.154832 | 348  | 0.89 | 0.301938 |
| 261740_at   | At1g47740 | hypothetical protein similar to unknown expressed protein                                                                                                                                                                                                                                                                                                                                                                                                                                                                                                                                                                                                                                                                                                                                                                                                                                                                                                                                                                                                                                                                                                                                                                                                                                                                                                                                                                                                                                                                                                                                                                                                                                                                                                                                                                                                                                                                                                                                                                                                                                                                                                                                                                                                                                                                                                                                                                                                                                                                                                                                                                                                                                                                                                                                                                                                                                                                                                                                                                                                                                                                                                                                                                                                                                                                                                                                                                                                                                                                                                                                                                                                                                                                                                                                                                                                                                                                                                                                                                                                                                                                                                                                                                                                                                                                                                                                                                                                                                                                                                                                                                                                                                                                                                                                                                                                                                                                                                                                                                                                                                                                                                                                                                                                                                                                                                                                                                                                                                                                                                                                                                                                                                                                                                                                                                                                                                                                                                                                                                                                                                                                                                                                                                                                                                                                                                                                                                                                                                                                                                                                                                                                                                                                                                                                                                                                                                                                                                                                                                                                                                                                                                                                                                                                                                                                                                                                                                                                                                                                                                                                                                                                                                                                                                                                                                                                                                                                                                                                                                                                                                                                                                                                                                                                                                                                                                                                                                                                                                                                                                                                                                                                                                                                                                                                                                                                                                                                                                                                                                                                                                                                                                                                                                                                                                                                                                                                                                                                                                                                                                                                                                              | 120 | 191  | 135  | 169  | 181  | 142  | 149  | 164  | 0.91 | 0.567988 | 146  | 154  | 155  | 201  | 133  | 157  | 137  | 125  | 152  | 155  | 0.98 | 0.858447 | 172  | 0.89 | 0.274187 |
| 261741_at   | At1g47870 | transcription factor, putative similar to l E2F transcription factor 2 (E2F2) / trans                                                                                                                                                                                                                                                                                                                                                                                                                                                                                                                                                                                                                                                                                                                                                                                                                                                                                                                                                                                                                                                                                                                                                                                                                                                                                                                                                                                                                                                                                                                                                                                                                                                                                                                                                                                                                                                                                                                                                                                                                                                                                                                                                                                                                                                                                                                                                                                                                                                                                                                                                                                                                                                                                                                                                                                                                                                                                                                                                                                                                                                                                                                                                                                                                                                                                                                                                                                                                                                                                                                                                                                                                                                                                                                                                                                                                                                                                                                                                                                                                                                                                                                                                                                                                                                                                                                                                                                                                                                                                                                                                                                                                                                                                                                                                                                                                                                                                                                                                                                                                                                                                                                                                                                                                                                                                                                                                                                                                                                                                                                                                                                                                                                                                                                                                                                                                                                                                                                                                                                                                                                                                                                                                                                                                                                                                                                                                                                                                                                                                                                                                                                                                                                                                                                                                                                                                                                                                                                                                                                                                                                                                                                                                                                                                                                                                                                                                                                                                                                                                                                                                                                                                                                                                                                                                                                                                                                                                                                                                                                                                                                                                                                                                                                                                                                                                                                                                                                                                                                                                                                                                                                                                                                                                                                                                                                                                                                                                                                                                                                                                                                                                                                                                                                                                                                                                                                                                                                                                                                                                                                                                  | 165 | 183  | 202  | 236  | 239  | 200  | 183  | 225  | 0.81 | 0.063984 | 169  | 150  | 180  | 245  | 208  | 198  | 156  | 167  | 166  | 195  | 0.85 | 0.240236 | 217  | 0.77 | 0.037840 |
| 261742_at   | At1g08390 | hypothetical protein predicted by gene expressed protein                                                                                                                                                                                                                                                                                                                                                                                                                                                                                                                                                                                                                                                                                                                                                                                                                                                                                                                                                                                                                                                                                                                                                                                                                                                                                                                                                                                                                                                                                                                                                                                                                                                                                                                                                                                                                                                                                                                                                                                                                                                                                                                                                                                                                                                                                                                                                                                                                                                                                                                                                                                                                                                                                                                                                                                                                                                                                                                                                                                                                                                                                                                                                                                                                                                                                                                                                                                                                                                                                                                                                                                                                                                                                                                                                                                                                                                                                                                                                                                                                                                                                                                                                                                                                                                                                                                                                                                                                                                                                                                                                                                                                                                                                                                                                                                                                                                                                                                                                                                                                                                                                                                                                                                                                                                                                                                                                                                                                                                                                                                                                                                                                                                                                                                                                                                                                                                                                                                                                                                                                                                                                                                                                                                                                                                                                                                                                                                                                                                                                                                                                                                                                                                                                                                                                                                                                                                                                                                                                                                                                                                                                                                                                                                                                                                                                                                                                                                                                                                                                                                                                                                                                                                                                                                                                                                                                                                                                                                                                                                                                                                                                                                                                                                                                                                                                                                                                                                                                                                                                                                                                                                                                                                                                                                                                                                                                                                                                                                                                                                                                                                                                                                                                                                                                                                                                                                                                                                                                                                                                                                                                                               | 149 | 193  | 201  | 213  | 258  | 198  | 181  | 223  | 0.81 | 0.157231 | 177  | 213  | 214  | 306  | 231  | 219  | 236  | 225  | 201  | 243  | 0.83 | 0.118184 | 252  | 0.80 | 0.164071 |
| 261743_s_at | At1g08370 | protein serine/threonine phosphatase 1 (PP2C) / serine/thr                                                                                                                                                                                                                                                                                                                                                                                                                                                                                                                                                                                                                                                                                                                                                                                                                                                                                                                                                                                                                                                                                                                                                                                                                                                                                                                                                                                                                                                                                                                                                                                                                                                                                                                                                                                                                                                                                                                                                                                                                                                                                                                                                                                                                                                                                                                                                                                                                                                                                                                                                                                                                                                                                                                                                                                                                                                                                                                                                                                                                                                                                                                                                                                                                                                                                                                                                                                                                                                                                                                                                                                                                                                                                                                                                                                                                                                                                                                                                                                                                                                                                                                                                                                                                                                                                                                                                                                                                                                                                                                                                                                                                                                                                                                                                                                                                                                                                                                                                                                                                                                                                                                                                                                                                                                                                                                                                                                                                                                                                                                                                                                                                                                                                                                                                                                                                                                                                                                                                                                                                                                                                                                                                                                                                                                                                                                                                                                                                                                                                                                                                                                                                                                                                                                                                                                                                                                                                                                                                                                                                                                                                                                                                                                                                                                                                                                                                                                                                                                                                                                                                                                                                                                                                                                                                                                                                                                                                                                                                                                                                                                                                                                                                                                                                                                                                                                                                                                                                                                                                                                                                                                                                                                                                                                                                                                                                                                                                                                                                                                                                                                                                                                                                                                                                                                                                                                                                                                                                                                                                                                                                                             | 86  | 123  | 141  | 152  | 159  | 133  | 109  | 141  | 0.77 | 0.127878 | 113  | 117  | 117  | 155  | 107  | 116  | 152  | 147  | 141  | 162  | 0.75 | 0.033275 | 52   | 0.75 | 0.036656 |
| 261744_at   | At1g08400 | nitrogen fixation protein (nifD), putative cytochrome desulfurase, putative                                                                                                                                                                                                                                                                                                                                                                                                                                                                                                                                                                                                                                                                                                                                                                                                                                                                                                                                                                                                                                                                                                                                                                                                                                                                                                                                                                                                                                                                                                                                                                                                                                                                                                                                                                                                                                                                                                                                                                                                                                                                                                                                                                                                                                                                                                                                                                                                                                                                                                                                                                                                                                                                                                                                                                                                                                                                                                                                                                                                                                                                                                                                                                                                                                                                                                                                                                                                                                                                                                                                                                                                                                                                                                                                                                                                                                                                                                                                                                                                                                                                                                                                                                                                                                                                                                                                                                                                                                                                                                                                                                                                                                                                                                                                                                                                                                                                                                                                                                                                                                                                                                                                                                                                                                                                                                                                                                                                                                                                                                                                                                                                                                                                                                                                                                                                                                                                                                                                                                                                                                                                                                                                                                                                                                                                                                                                                                                                                                                                                                                                                                                                                                                                                                                                                                                                                                                                                                                                                                                                                                                                                                                                                                                                                                                                                                                                                                                                                                                                                                                                                                                                                                                                                                                                                                                                                                                                                                                                                                                                                                                                                                                                                                                                                                                                                                                                                                                                                                                                                                                                                                                                                                                                                                                                                                                                                                                                                                                                                                                                                                                                                                                                                                                                                                                                                                                                                                                                                                                                                                                                                            | 126 | 140  | 160  | 153  | 177  | 155  | 145  | 161  | 0.90 | 0.262837 | 148  | 145  | 148  | 188  | 156  | 149  | 175  | 167  | 147  | 167  | 0.88 | 0.070649 | 165  | 0.89 | 0.215746 |
| 261745_at   | At1g08500 | unknown protein identical to unknown c plastocyanin-like domain-containing prot                                                                                                                                                                                                                                                                                                                                                                                                                                                                                                                                                                                                                                                                                                                                                                                                                                                                                                                                                                                                                                                                                                                                                                                                                                                                                                                                                                                                                                                                                                                                                                                                                                                                                                                                                                                                                                                                                                                                                                                                                                                                                                                                                                                                                                                                                                                                                                                                                                                                                                                                                                                                                                                                                                                                                                                                                                                                                                                                                                                                                                                                                                                                                                                                                                                                                                                                                                                                                                                                                                                                                                                                                                                                                                                                                                                                                                                                                                                                                                                                                                                                                                                                                                                                                                                                                                                                                                                                                                                                                                                                                                                                                                                                                                                                                                                                                                                                                                                                                                                                                                                                                                                                                                                                                                                                                                                                                                                                                                                                                                                                                                                                                                                                                                                                                                                                                                                                                                                                                                                                                                                                                                                                                                                                                                                                                                                                                                                                                                                                                                                                                                                                                                                                                                                                                                                                                                                                                                                                                                                                                                                                                                                                                                                                                                                                                                                                                                                                                                                                                                                                                                                                                                                                                                                                                                                                                                                                                                                                                                                                                                                                                                                                                                                                                                                                                                                                                                                                                                                                                                                                                                                                                                                                                                                                                                                                                                                                                                                                                                                                                                                                                                                                                                                                                                                                                                                                                                                                                                                                                                                                                        | 39  | 41   | 54   | 50   | 52   | 46   | 44   | 49   | 0.90 | 0.394617 | 35   | 41   | 42   | 37   | 33   | 34   | 36   | 32   | 39   | 35   | 1.14 | 0.061553 | 35   | 1.13 | 0.149361 |
| 261746_at   | At1g08380 | unknown protein - supported by full-length expressed protein                                                                                                                                                                                                                                                                                                                                                                                                                                                                                                                                                                                                                                                                                                                                                                                                                                                                                                                                                                                                                                                                                                                                                                                                                                                                                                                                                                                                                                                                                                                                                                                                                                                                                                                                                                                                                                                                                                                                                                                                                                                                                                                                                                                                                                                                                                                                                                                                                                                                                                                                                                                                                                                                                                                                                                                                                                                                                                                                                                                                                                                                                                                                                                                                                                                                                                                                                                                                                                                                                                                                                                                                                                                                                                                                                                                                                                                                                                                                                                                                                                                                                                                                                                                                                                                                                                                                                                                                                                                                                                                                                                                                                                                                                                                                                                                                                                                                                                                                                                                                                                                                                                                                                                                                                                                                                                                                                                                                                                                                                                                                                                                                                                                                                                                                                                                                                                                                                                                                                                                                                                                                                                                                                                                                                                                                                                                                                                                                                                                                                                                                                                                                                                                                                                                                                                                                                                                                                                                                                                                                                                                                                                                                                                                                                                                                                                                                                                                                                                                                                                                                                                                                                                                                                                                                                                                                                                                                                                                                                                                                                                                                                                                                                                                                                                                                                                                                                                                                                                                                                                                                                                                                                                                                                                                                                                                                                                                                                                                                                                                                                                                                                                                                                                                                                                                                                                                                                                                                                                                                                                                                                                           | 862 | 1374 | 1203 | 1365 | 1403 | 1057 | 1146 | 1275 | 0.90 | 0.527929 | 1558 | 1743 | 1553 | 2300 | 1799 | 1734 | 1919 | 1851 | 1618 | 1920 | 0.84 | 0.074592 | 1944 | 0.83 | 0.195998 |
| 261747_at   | At1g08350 | unknown protein similar to putative end membrane protein 70 family protein                                                                                                                                                                                                                                                                                                                                                                                                                                                                                                                                                                                                                                                                                                                                                                                                                                                                                                                                                                                                                                                                                                                                                                                                                                                                                                                                                                                                                                                                                                                                                                                                                                                                                                                                                                                                                                                                                                                                                                                                                                                                                                                                                                                                                                                                                                                                                                                                                                                                                                                                                                                                                                                                                                                                                                                                                                                                                                                                                                                                                                                                                                                                                                                                                                                                                                                                                                                                                                                                                                                                                                                                                                                                                                                                                                                                                                                                                                                                                                                                                                                                                                                                                                                                                                                                                                                                                                                                                                                                                                                                                                                                                                                                                                                                                                                                                                                                                                                                                                                                                                                                                                                                                                                                                                                                                                                                                                                                                                                                                                                                                                                                                                                                                                                                                                                                                                                                                                                                                                                                                                                                                                                                                                                                                                                                                                                                                                                                                                                                                                                                                                                                                                                                                                                                                                                                                                                                                                                                                                                                                                                                                                                                                                                                                                                                                                                                                                                                                                                                                                                                                                                                                                                                                                                                                                                                                                                                                                                                                                                                                                                                                                                                                                                                                                                                                                                                                                                                                                                                                                                                                                                                                                                                                                                                                                                                                                                                                                                                                                                                                                                                                                                                                                                                                                                                                                                                                                                                                                                                                                                                                             | 169 | 195  | 207  | 231  | 239  | 195  | 190  | 222  | 0.86 | 0.144566 | 205  | 202  | 219  | 306  | 202  | 263  | 233  | 209  | 244  | 244  | 0.86 | 0.240051 | 240  | 0.87 | 0.380802 |
| 261720_at   | At1g08400 | hypothetical protein similar to hypothetical histone deacetylase family protein (HDA                                                                                                                                                                                                                                                                                                                                                                                                                                                                                                                                                                                                                                                                                                                                                                                                                                                                                                                                                                                                                                                                                                                                                                                                                                                                                                                                                                                                                                                                                                                                                                                                                                                                                                                                                                                                                                                                                                                                                                                                                                                                                                                                                                                                                                                                                                                                                                                                                                                                                                                                                                                                                                                                                                                                                                                                                                                                                                                                                                                                                                                                                                                                                                                                                                                                                                                                                                                                                                                                                                                                                                                                                                                                                                                                                                                                                                                                                                                                                                                                                                                                                                                                                                                                                                                                                                                                                                                                                                                                                                                                                                                                                                                                                                                                                                                                                                                                                                                                                                                                                                                                                                                                                                                                                                                                                                                                                                                                                                                                                                                                                                                                                                                                                                                                                                                                                                                                                                                                                                                                                                                                                                                                                                                                                                                                                                                                                                                                                                                                                                                                                                                                                                                                                                                                                                                                                                                                                                                                                                                                                                                                                                                                                                                                                                                                                                                                                                                                                                                                                                                                                                                                                                                                                                                                                                                                                                                                                                                                                                                                                                                                                                                                                                                                                                                                                                                                                                                                                                                                                                                                                                                                                                                                                                                                                                                                                                                                                                                                                                                                                                                                                                                                                                                                                                                                                                                                                                                                                                                                                                                                                   | 133 | 180  | 228  | 194  | 225  | 154  | 181  | 212  | 0.84 | 0.077131 | 236  | 263  | 213  | 303  | 243  | 282  | 281  | 271  | 237  | 274  | 0.86 | 0.101841 | 274  | 0.86 | 0.235126 |
| 261721_at   | At1g08480 | unknown protein - supported by cDNA: expressed protein                                                                                                                                                                                                                                                                                                                                                                                                                                                                                                                                                                                                                                                                                                                                                                                                                                                                                                                                                                                                                                                                                                                                                                                                                                                                                                                                                                                                                                                                                                                                                                                                                                                                                                                                                                                                                                                                                                                                                                                                                                                                                                                                                                                                                                                                                                                                                                                                                                                                                                                                                                                                                                                                                                                                                                                                                                                                                                                                                                                                                                                                                                                                                                                                                                                                                                                                                                                                                                                                                                                                                                                                                                                                                                                                                                                                                                                                                                                                                                                                                                                                                                                                                                                                                                                                                                                                                                                                                                                                                                                                                                                                                                                                                                                                                                                                                                                                                                                                                                                                                                                                                                                                                                                                                                                                                                                                                                                                                                                                                                                                                                                                                                                                                                                                                                                                                                                                                                                                                                                                                                                                                                                                                                                                                                                                                                                                                                                                                                                                                                                                                                                                                                                                                                                                                                                                                                                                                                                                                                                                                                                                                                                                                                                                                                                                                                                                                                                                                                                                                                                                                                                                                                                                                                                                                                                                                                                                                                                                                                                                                                                                                                                                                                                                                                                                                                                                                                                                                                                                                                                                                                                                                                                                                                                                                                                                                                                                                                                                                                                                                                                                                                                                                                                                                                                                                                                                                                                                                                                                                                                                                                                 | 733 | 884  | 858  | 956  | 1111 | 862  | 825  | 976  | 0.85 | 0.154288 | 966  | 939  | 946  | 1165 | 1035 | 953  | 1010 | 958  | 951  | 1024 | 0.93 | 0.203122 | 1051 | 0.90 | 0.181542 |
| 261722_at   | At1g08510 | acyl-(acyl carrier protein) thioesterase, acyl-(acyl carrier protein) thioesterase / i                                                                                                                                                                                                                                                                                                                                                                                                                                                                                                                                                                                                                                                                                                                                                                                                                                                                                                                                                                                                                                                                                                                                                                                                                                                                                                                                                                                                                                                                                                                                                                                                                                                                                                                                                                                                                                                                                                                                                                                                                                                                                                                                                                                                                                                                                                                                                                                                                                                                                                                                                                                                                                                                                                                                                                                                                                                                                                                                                                                                                                                                                                                                                                                                                                                                                                                                                                                                                                                                                                                                                                                                                                                                                                                                                                                                                                                                                                                                                                                                                                                                                                                                                                                                                                                                                                                                                                                                                                                                                                                                                                                                                                                                                                                                                                                                                                                                                                                                                                                                                                                                                                                                                                                                                                                                                                                                                                                                                                                                                                                                                                                                                                                                                                                                                                                                                                                                                                                                                                                                                                                                                                                                                                                                                                                                                                                                                                                                                                                                                                                                                                                                                                                                                                                                                                                                                                                                                                                                                                                                                                                                                                                                                                                                                                                                                                                                                                                                                                                                                                                                                                                                                                                                                                                                                                                                                                                                                                                                                                                                                                                                                                                                                                                                                                                                                                                                                                                                                                                                                                                                                                                                                                                                                                                                                                                                                                                                                                                                                                                                                                                                                                                                                                                                                                                                                                                                                                                                                                                                                                                                                 | 389 | 488  | 511  | 542  | 581  | 420  | 456  | 515  | 0.89 | 0.386657 | 369  | 394  | 363  | 502  | 402  | 370  | 408  | 396  | 376  | 416  | 0.90 | 0.242219 | 425  | 0.88 | 0.296514 |
| 261692_at   | At1g08450 | calreticulin, putative similar to calreticu catenulysin 3 (CRT3)                                                                                                                                                                                                                                                                                                                                                                                                                                                                                                                                                                                                                                                                                                                                                                                                                                                                                                                                                                                                                                                                                                                                                                                                                                                                                                                                                                                                                                                                                                                                                                                                                                                                                                                                                                                                                                                                                                                                                                                                                                                                                                                                                                                                                                                                                                                                                                                                                                                                                                                                                                                                                                                                                                                                                                                                                                                                                                                                                                                                                                                                                                                                                                                                                                                                                                                                                                                                                                                                                                                                                                                                                                                                                                                                                                                                                                                                                                                                                                                                                                                                                                                                                                                                                                                                                                                                                                                                                                                                                                                                                                                                                                                                                                                                                                                                                                                                                                                                                                                                                                                                                                                                                                                                                                                                                                                                                                                                                                                                                                                                                                                                                                                                                                                                                                                                                                                                                                                                                                                                                                                                                                                                                                                                                                                                                                                                                                                                                                                                                                                                                                                                                                                                                                                                                                                                                                                                                                                                                                                                                                                                                                                                                                                                                                                                                                                                                                                                                                                                                                                                                                                                                                                                                                                                                                                                                                                                                                                                                                                                                                                                                                                                                                                                                                                                                                                                                                                                                                                                                                                                                                                                                                                                                                                                                                                                                                                                                                                                                                                                                                                                                                                                                                                                                                                                                                                                                                                                                                                                                                                                                                       | 106 | 158  | 131  | 157  | 173  | 130  | 131  | 153  | 0.86 | 0.326793 | 117  | 115  | 126  | 171  | 133  | 129  | 134  | 139  | 119  | 141  | 0.84 | 0.076495 | 144  | 0.82 | 0.134693 |
| 261693_at   | At1g08370 | hypothetical protein similar to hypothetical hydroxycortisol-6-oxo-11-oxo-13-oxo-14-oxo-15-oxo-16-oxo-17-oxo-18-oxo-19-oxo-20-oxo-21-oxo-22-oxo-23-oxo-24-oxo-25-oxo-26-oxo-27-oxo-28-oxo-29-oxo-30-oxo-31-oxo-32-oxo-33-oxo-34-oxo-35-oxo-36-oxo-37-oxo-38-oxo-39-oxo-40-oxo-41-oxo-42-oxo-43-oxo-44-oxo-45-oxo-46-oxo-47-oxo-48-oxo-49-oxo-50-oxo-51-oxo-52-oxo-53-oxo-54-oxo-55-oxo-56-oxo-57-oxo-58-oxo-59-oxo-60-oxo-61-oxo-62-oxo-63-oxo-64-oxo-65-oxo-66-oxo-67-oxo-68-oxo-69-oxo-70-oxo-71-oxo-72-oxo-73-oxo-74-oxo-75-oxo-76-oxo-77-oxo-78-oxo-79-oxo-80-oxo-81-oxo-82-oxo-83-oxo-84-oxo-85-oxo-86-oxo-87-oxo-88-oxo-89-oxo-90-oxo-91-oxo-92-oxo-93-oxo-94-oxo-95-oxo-96-oxo-97-oxo-98-oxo-99-oxo-100-oxo-101-oxo-102-oxo-103-oxo-104-oxo-105-oxo-106-oxo-107-oxo-108-oxo-109-oxo-110-oxo-111-oxo-112-oxo-113-oxo-114-oxo-115-oxo-116-oxo-117-oxo-118-oxo-119-oxo-120-oxo-121-oxo-122-oxo-123-oxo-124-oxo-125-oxo-126-oxo-127-oxo-128-oxo-129-oxo-130-oxo-131-oxo-132-oxo-133-oxo-134-oxo-135-oxo-136-oxo-137-oxo-138-oxo-139-oxo-140-oxo-141-oxo-142-oxo-143-oxo-144-oxo-145-oxo-146-oxo-147-oxo-148-oxo-149-oxo-150-oxo-151-oxo-152-oxo-153-oxo-154-oxo-155-oxo-156-oxo-157-oxo-158-oxo-159-oxo-160-oxo-161-oxo-162-oxo-163-oxo-164-oxo-165-oxo-166-oxo-167-oxo-168-oxo-169-oxo-170-oxo-171-oxo-172-oxo-173-oxo-174-oxo-175-oxo-176-oxo-177-oxo-178-oxo-179-oxo-180-oxo-181-oxo-182-oxo-183-oxo-184-oxo-185-oxo-186-oxo-187-oxo-188-oxo-189-oxo-190-oxo-191-oxo-192-oxo-193-oxo-194-oxo-195-oxo-196-oxo-197-oxo-198-oxo-199-oxo-200-oxo-201-oxo-202-oxo-203-oxo-204-oxo-205-oxo-206-oxo-207-oxo-208-oxo-209-oxo-210-oxo-211-oxo-212-oxo-213-oxo-214-oxo-215-oxo-216-oxo-217-oxo-218-oxo-219-oxo-220-oxo-221-oxo-222-oxo-223-oxo-224-oxo-225-oxo-226-oxo-227-oxo-228-oxo-229-oxo-230-oxo-231-oxo-232-oxo-233-oxo-234-oxo-235-oxo-236-oxo-237-oxo-238-oxo-239-oxo-240-oxo-241-oxo-242-oxo-243-oxo-244-oxo-245-oxo-246-oxo-247-oxo-248-oxo-249-oxo-250-oxo-251-oxo-252-oxo-253-oxo-254-oxo-255-oxo-256-oxo-257-oxo-258-oxo-259-oxo-260-oxo-261-oxo-262-oxo-263-oxo-264-oxo-265-oxo-266-oxo-267-oxo-268-oxo-269-oxo-270-oxo-271-oxo-272-oxo-273-oxo-274-oxo-275-oxo-276-oxo-277-oxo-278-oxo-279-oxo-280-oxo-281-oxo-282-oxo-283-oxo-284-oxo-285-oxo-286-oxo-287-oxo-288-oxo-289-oxo-290-oxo-291-oxo-292-oxo-293-oxo-294-oxo-295-oxo-296-oxo-297-oxo-298-oxo-299-oxo-300-oxo-301-oxo-302-oxo-303-oxo-304-oxo-305-oxo-306-oxo-307-oxo-308-oxo-309-oxo-310-oxo-311-oxo-312-oxo-313-oxo-314-oxo-315-oxo-316-oxo-317-oxo-318-oxo-319-oxo-320-oxo-321-oxo-322-oxo-323-oxo-324-oxo-325-oxo-326-oxo-327-oxo-328-oxo-329-oxo-330-oxo-331-oxo-332-oxo-333-oxo-334-oxo-335-oxo-336-oxo-337-oxo-338-oxo-339-oxo-340-oxo-341-oxo-342-oxo-343-oxo-344-oxo-345-oxo-346-oxo-347-oxo-348-oxo-349-oxo-350-oxo-351-oxo-352-oxo-353-oxo-354-oxo-355-oxo-356-oxo-357-oxo-358-oxo-359-oxo-360-oxo-361-oxo-362-oxo-363-oxo-364-oxo-365-oxo-366-oxo-367-oxo-368-oxo-369-oxo-370-oxo-371-oxo-372-oxo-373-oxo-374-oxo-375-oxo-376-oxo-377-oxo-378-oxo-379-oxo-380-oxo-381-oxo-382-oxo-383-oxo-384-oxo-385-oxo-386-oxo-387-oxo-388-oxo-389-oxo-390-oxo-391-oxo-392-oxo-393-oxo-394-oxo-395-oxo-396-oxo-397-oxo-398-oxo-399-oxo-400-oxo-401-oxo-402-oxo-403-oxo-404-oxo-405-oxo-406-oxo-407-oxo-408-oxo-409-oxo-410-oxo-411-oxo-412-oxo-413-oxo-414-oxo-415-oxo-416-oxo-417-oxo-418-oxo-419-oxo-420-oxo-421-oxo-422-oxo-423-oxo-424-oxo-425-oxo-426-oxo-427-oxo-428-oxo-429-oxo-430-oxo-431-oxo-432-oxo-433-oxo-434-oxo-435-oxo-436-oxo-437-oxo-438-oxo-439-oxo-440-oxo-441-oxo-442-oxo-443-oxo-444-oxo-445-oxo-446-oxo-447-oxo-448-oxo-449-oxo-450-oxo-451-oxo-452-oxo-453-oxo-454-oxo-455-oxo-456-oxo-457-oxo-458-oxo-459-oxo-460-oxo-461-oxo-462-oxo-463-oxo-464-oxo-465-oxo-466-oxo-467-oxo-468-oxo-469-oxo-470-oxo-471-oxo-472-oxo-473-oxo-474-oxo-475-oxo-476-oxo-477-oxo-478-oxo-479-oxo-480-oxo-481-oxo-482-oxo-483-oxo-484-oxo-485-oxo-486-oxo-487-oxo-488-oxo-489-oxo-490-oxo-491-oxo-492-oxo-493-oxo-494-oxo-495-oxo-496-oxo-497-oxo-498-oxo-499-oxo-500-oxo-501-oxo-502-oxo-503-oxo-504-oxo-505-oxo-506-oxo-507-oxo-508-oxo-509-oxo-510-oxo-511-oxo-512-oxo-513-oxo-514-oxo-515-oxo-516-oxo-517-oxo-518-oxo-519-oxo-520-oxo-521-oxo-522-oxo-523-oxo-524-oxo-525-oxo-526-oxo-527-oxo-528-oxo-529-oxo-530-oxo-531-oxo-532-oxo-533-oxo-534-oxo-535-oxo-536-oxo-537-oxo-538-oxo-539-oxo-540-oxo-541-oxo-542-oxo-543-oxo-544-oxo-545-oxo-546-oxo-547-oxo-548-oxo-549-oxo-550-oxo-551-oxo-552-oxo-553-oxo-554-oxo-555-oxo-556-oxo-557-oxo-558-oxo-559-oxo-560-oxo-561-oxo-562-oxo-563-oxo-564-oxo-565-oxo-566-oxo-567-oxo-568-oxo-569-oxo-570-oxo-571-oxo-572-oxo-573-oxo-574-oxo-575-oxo-576-oxo-577-oxo-578-oxo-579-oxo-580-oxo-581-oxo-582-oxo-583-oxo-584-oxo-585-oxo-586-oxo-587-oxo-588-oxo-589-oxo-590-oxo-591-oxo-592-oxo-593-oxo-594-oxo-595-oxo-596-oxo-597-oxo-598-oxo-599-oxo-600-oxo-601-oxo-602-oxo-603-oxo-604-oxo-605-oxo-606-oxo-607-oxo-608-oxo-609-oxo-610-oxo-611-oxo-612-oxo-613-oxo-614-oxo-615-oxo-616-oxo-617-oxo-618-oxo-619-oxo-620-oxo-621-oxo-622-oxo-623-oxo-624-oxo-625-oxo-626-oxo-627-oxo-628-oxo-629-oxo-630-oxo-631-oxo-632-oxo-633-oxo-634-oxo-635-oxo-636-oxo-637-oxo-638-oxo-639-oxo-640-oxo-641-oxo-642-oxo-643-oxo-644-oxo-645-oxo-646-oxo-647-oxo-648-oxo-649-oxo-650-oxo-651-oxo-652-oxo-653-oxo-654-oxo-655-oxo-656-oxo-657-oxo-658-oxo-659-oxo-660-oxo-661-oxo-662-oxo-663-oxo-664-oxo-665-oxo-666-oxo-667-oxo-668-oxo-669-oxo-670-oxo-671-oxo-672-oxo-673-oxo-674-oxo-675-oxo-676-oxo-677-oxo-678-oxo-679-oxo-680-oxo-681-oxo-682-oxo-683-oxo-684-oxo-685-oxo-686-oxo-687-oxo-688-oxo-689-oxo-690-oxo-691-oxo-692-oxo-693-oxo-694-oxo-695-oxo-696-oxo-697-oxo-698-oxo-699-oxo-700-oxo-701-oxo-702-oxo-703-oxo-704-oxo-705-oxo-706-oxo-707-oxo-708-oxo-709-oxo-710-oxo-711-oxo-712-oxo-713-oxo-714-oxo-715-oxo-716-oxo-717-oxo-718-oxo-719-oxo-720-oxo-721-oxo-722-oxo-723-oxo-724-oxo-725-oxo-726-oxo-727-oxo-728-oxo-729-oxo-730-oxo-731-oxo-732-oxo-733-oxo-734-oxo-735-oxo-736-oxo-737-oxo-738-oxo-739-oxo-740-oxo-741-oxo-742-oxo-743-oxo-744-oxo-745-oxo-746-oxo-747-oxo-748-oxo-749-oxo-750-oxo-751-oxo-752-oxo-753-oxo-754-oxo-755-oxo-756-oxo-757-oxo-758-oxo-759-oxo-760-oxo-761-oxo-762-oxo-763-oxo-764-oxo-765-oxo-766-oxo-767-oxo-768-oxo-769-oxo-770-oxo-771-oxo-772-oxo-773-oxo-774-oxo-775-oxo-776-oxo-777-oxo-778-oxo-779-oxo-780-oxo-781-oxo-782-oxo-783-oxo-784-oxo-785-oxo-786-oxo-787-oxo-788-oxo-789-oxo-790-oxo-791-oxo-792-oxo-793-oxo-794-oxo-795-oxo-796-oxo-797-oxo-798-oxo-799-oxo-800-oxo-801-oxo-802-oxo-803-oxo-804-oxo-805-oxo-806-oxo-807-oxo-808-oxo-809-oxo-810-oxo-811-oxo-812-oxo-813-oxo-814-oxo-815-oxo-816-oxo-817-oxo-818-oxo-819-oxo-820-oxo-821-oxo-822-oxo-823-oxo-824-oxo-825-oxo-826-oxo-827-oxo-828-oxo-829-oxo-830-oxo-831-oxo-832-oxo-833-oxo-834-oxo-835-oxo-836-oxo-837-oxo-838-oxo-839-oxo-840-oxo-841-oxo-842-oxo-843-oxo-844-oxo-845-oxo-846-oxo-847-oxo-848-oxo-849-oxo-850-oxo-851-oxo-852-oxo-853-oxo-854-oxo-855-oxo-856-oxo-857-oxo-858-oxo-859-oxo-860-oxo-861-oxo-862-oxo-863-oxo-864-oxo-865-oxo-866-oxo-867-oxo-868-oxo-869-oxo-870-oxo-871-oxo-872-oxo-873-oxo-874-oxo-875-oxo-876-oxo-877-oxo-878-oxo-879-oxo-880-oxo-881-oxo-882-oxo-883-oxo-884-oxo-885-oxo-886-oxo-887-oxo-888-oxo-889-oxo-890-oxo-891-oxo-892-oxo-893-oxo-894-oxo-895-oxo-896-oxo-897-oxo-898-oxo-899-oxo-900-oxo-901-oxo-902-oxo-903-oxo-904-oxo-905-oxo-906-oxo-907-oxo-908-oxo-909-oxo-910-oxo-911-oxo-912-oxo-913-oxo-914-oxo-915-oxo-916-oxo-917-oxo-918-oxo-919-oxo-920-oxo-921-oxo-922-oxo-923-oxo-924-oxo-925-oxo-926-oxo-927-oxo-928-oxo-929-oxo-930-oxo-931-oxo-932-oxo-933-oxo-934-oxo-935-oxo-936-oxo-937-oxo-938-oxo-939-oxo-940-oxo-941-oxo-942-oxo-943-oxo-944-oxo-945-oxo-946-oxo-947-oxo-948-oxo-949-oxo-950-oxo-951-oxo-952-oxo-953-oxo-954-oxo-955-oxo-956-oxo-957-oxo-958-oxo-959-oxo-960-oxo-961-oxo-962-oxo-963-oxo-964-oxo-965-oxo-966-oxo-967-oxo-968-oxo-969-oxo-970-oxo-971-oxo-972-oxo-973-oxo-974-oxo-975-oxo-976-oxo-977-oxo-978-oxo-979-oxo-980-oxo-981-oxo-982-oxo-983-oxo-984-oxo-985-oxo-986-oxo-987-oxo-988-oxo-989-oxo-990-oxo-991-oxo-992-oxo-993-oxo-994-oxo-995-oxo-996-oxo-997-oxo-998-oxo-999-oxo-1000-oxo-1001-oxo-1002-oxo-1003-oxo-1004-oxo-1005-oxo-1006-oxo-1007-oxo-1008-oxo-1009-oxo-1010-oxo-1011-oxo-1012-oxo-1013-oxo-1014-oxo-1015-oxo-1016-oxo-1017-oxo-1018-oxo-1019-oxo-1020-oxo-1021-oxo-1022-oxo-1023-oxo-1024-oxo-1025-oxo-1026-oxo-1027-oxo-1028-oxo-1029-oxo-1030-oxo-1031-oxo-1032-oxo-1033-oxo-1034-oxo-1035-oxo-1036-oxo-1037-oxo-1038-oxo-1039-oxo-1040-oxo-1041-oxo-1042-oxo-1043-oxo-1044-oxo-1045-oxo-1046-oxo-1047-oxo-1048-oxo-1049-oxo-1050-oxo-1051-oxo-1052-oxo-1053-oxo-1054-oxo-1055-oxo-1056-oxo-1057-oxo-1058-oxo-1059-oxo-1060-oxo-1061-oxo-1062-oxo-1063-oxo-1064-oxo-1065-oxo-1066-oxo-1067-oxo-1068-oxo-1069-oxo-1070-oxo-1071-oxo-1072-oxo-1073-oxo-1074-oxo-1075-oxo-1076-oxo-1077-oxo-1078-oxo-1079-oxo-1080-oxo-1081-oxo-1082-oxo-1083-oxo-1084-oxo-1085-oxo-1086-oxo-1087-oxo-1088-oxo-1089-oxo-1090-oxo-1091-oxo-1092-oxo-1093-oxo-1094-oxo-1095-oxo-1096-oxo-1097-oxo-1098-oxo-1099-oxo-1100-oxo-1101-oxo-1102-oxo-1103-oxo-1104-oxo-1105-oxo-1106-oxo-1107-oxo-1108-oxo-1109-oxo-1110-oxo-1111-oxo-1112-oxo-1113-oxo-1114-oxo-1115-oxo-1116-oxo-1117-oxo-1118-oxo-1119-oxo-1120-oxo-1121-oxo-1122-oxo-1123-oxo-1124-oxo-1125-oxo-1126-oxo-1127-oxo-1128-oxo-1129-oxo-1130-oxo-1131-oxo-1132-oxo-1133-oxo-1134-oxo-1135-oxo-1136-oxo-1137-oxo-1138-oxo-1139-oxo-1140-oxo-1141-oxo-1142-oxo-1143-oxo-1144-oxo-1145-oxo-1146-oxo-1147-oxo-1148-oxo-1149-oxo-1150-oxo-1151-oxo-115 |     |      |      |      |      |      |      |      |      |          |      |      |      |      |      |      |      |      |      |      |      |          |      |      |          |





|             |           |                                             |                                              |      |      |      |      |      |      |      |      |      |          |          |      |      |      |      |      |      |      |      |      |      |          |      |      |          |
|-------------|-----------|---------------------------------------------|----------------------------------------------|------|------|------|------|------|------|------|------|------|----------|----------|------|------|------|------|------|------|------|------|------|------|----------|------|------|----------|
| 261466_s_at | At1g07705 | unknown protein                             | NOT2(NOT3/NOT5 family protein                | 138  | 160  | 164  | 215  | 232  | 172  | 154  | 207  | 0.75 | 0.054705 | 121      | 108  | 121  | 153  | 131  | 120  | 143  | 126  | 117  | 135  | 0.87 | 0.077402 | 135  | 0.87 | 0.159599 |
| 261466_at   | At1g07690 | hypothetical protein predicted by genei     | hypothetical protein                         | 28   | 36   | 44   | 46   | 40   | 45   | 36   | 44   | 0.82 | 0.172233 | 30       | 26   | 31   | 32   | 26   | 33   | 31   | 29   | 29   | 30   | 0.96 | 0.588386 | 30   | 0.96 | 0.652999 |
| 261432_s_at | At1g07680 | hypothetical protein predicted by genei     | hypothetical protein                         | 430  | 32   | 43   | 41   | 39   | 40   | 35   | 40   | 0.87 | 0.238095 | 24       | 29   | 31   | 32   | 32   | 30   | 39   | 31   | 28   | 33   | 0.85 | 0.109542 | 31   | 0.89 | 0.175748 |
| 261432_s_at | At1g07610 | endoplasmic reticulum-like calcium-binding  | calreticulin-like protein                    | 521  | 663  | 692  | 741  | 610  | 573  | 681  | 579  | 0.85 | 0.143072 | 321      | 633  | 376  | 446  | 389  | 419  | 474  | 417  | 353  | 419  | 0.83 | 0.117603 | 366  | 0.83 | 0.224697 |
| 261434_at   | At1g07650 | receptor-like serine/threonine kinase, c    | leucine-rich repeat transmembrane prot       | 431  | 460  | 570  | 385  | 528  | 347  | 420  | 116  | 0.86 | 0.389128 | 344      | 297  | 294  | 367  | 355  | 291  | 498  | 480  | 311  | 398  | 0.78 | 0.158084 | 338  | 0.92 | 0.412351 |
| 261435_at   | At1g07620 | GTP-binding protein, putative similar t     | GTP1/GBG family protein                      | 105  | 140  | 155  | 152  | 168  | 138  | 133  | 153  | 0.87 | 0.309133 | 133      | 155  | 144  | 220  | 174  | 168  | 183  | 182  | 144  | 185  | 0.78 | 0.018198 | 187  | 0.77 | 0.068192 |
| 261436_at   | At1g07870 | protein kinase, putative (fragment)         | protein kinase family protein                | 118  | 322  | 386  | 390  | 408  | 308  | 342  | 369  | 0.93 | 0.518593 | 293      | 281  | 255  | 348  | 282  | 273  | 296  | 307  | 276  | 301  | 0.92 | 0.245780 | 301  | 0.92 | 0.399225 |
| 261437_at   | At1g07745 | hypothetical protein predicted by genei     | DNA repair protein                           | 52   | 80   | 77   | 76   | 89   | 66   | 70   | 78   | 0.90 | 0.077445 | 53       | 60   | 71   | 60   | 70   | 71   | 79   | 78   | 79   | 80   | 0.92 | 0.221469 | 81   | 0.92 | 0.234695 |
| 261438_at   | At1g07600 | metallothionein-like protein identical to   | pentathioneic (IPPR) repeat-containi         | 396  | 536  | 732  | 534  | 498  | 291  | 555  | 441  | 1.26 | 0.410228 | 815      | 694  | 817  | 945  | 802  | 830  | 698  | 736  | 775  | 802  | 0.97 | 0.689326 | 859  | 0.90 | 0.322633 |
| 261408_s_at | At1g07820 | histone H4 identical to GB-M36659 from      | histone H4 // histone H4                     | 2663 | 3069 | 3341 | 3341 | 3171 | 3055 | 2991 | 3189 | 0.94 | 0.460483 | 2221     | 2358 | 2610 | 3078 | 2464 | 2266 | 2789 | 2852 | 2396 | 2690 | 0.89 | 0.211789 | 2602 | 0.92 | 0.487452 |
| 261409_at   | At1g07640 | zinc finger protein OBP2 identical to the   | Deo1-zinc finger domain-containing c         | 8    | 107  | 115  | 225  | 227  | 205  | 101  | 219  | 0.46 | 0.000715 | 164      | 179  | 163  | 232  | 227  | 207  | 280  | 244  | 169  | 256  | 0.66 | 0.019375 | 252  | 0.67 | 0.081272 |
| 261410_at   | At1g07610 | metallothionein-like protein identical to   | metallothionein-like protein 1C (MT-1C)      | 281  | 351  | 349  | 170  | 165  | 142  | 103  | 159  | 0.89 | 0.143032 | 250      | 185  | 280  | 257  | 205  | 141  | 238  | 117  | 238  | 117  | 0.88 | 0.168590 | 204  | 1.17 | 0.498124 |
| 261411_at   | At1g07700 | histone H2B identical to GB-C47315f         | histone H2B, putative                        | 1296 | 1421 | 1312 | 1609 | 1847 | 1457 | 1367 | 1433 | 157  | 0.83     | 0.031668 | 1187 | 1172 | 1351 | 1942 | 1477 | 1324 | 1220 | 1233 | 1419 | 0.87 | 0.226509 | 1548 | 0.80 | 0.311557 |
| 261412_at   | At1g07890 | L-ascorbate peroxidase identical to the     | L-ascorbate peroxidase 1, cytosolic (AP      | 3334 | 3551 | 3523 | 4499 | 4938 | 4166 | 3469 | 4534 | 0.77 | 0.010401 | 3467     | 3596 | 3731 | 4854 | 4150 | 3551 | 4048 | 4245 | 3598 | 4169 | 0.86 | 0.090907 | 4185 | 0.86 | 0.201595 |
| 261413_at   | At1g07630 | unknown protein, supported by full-length   | protein phosphatase 2C family protein /      | 174  | 218  | 258  | 231  | 258  | 190  | 217  | 226  | 0.96 | 0.784795 | 104      | 102  | 127  | 156  | 126  | 123  | 142  | 130  | 111  | 136  | 0.82 | 0.050982 | 135  | 0.82 | 0.145110 |
| 261414_at   | At1g07795 | Expressed protein, supported by full-length | expressed protein                            | 118  | 149  | 161  | 148  | 176  | 157  | 143  | 161  | 0.89 | 0.368246 | 191      | 159  | 160  | 208  | 148  | 175  | 213  | 202  | 170  | 190  | 0.90 | 0.320562 | 177  | 0.96 | 0.379683 |
| 261404_at   | At1g19600 | alcohol dehydrogenase, putative similar     | alcohol dehydrogenase C4-type (RPS15A)       | 1098 | 1204 | 1023 | 1052 | 1052 | 922  | 1212 | 1012 | 1.20 | 0.076187 | 1134     | 1207 | 1182 | 1112 | 944  | 902  | 869  | 818  | 1174 | 929  | 1.26 | 0.011724 | 986  | 1.19 | 0.040506 |
| 261416_at   | At1g07700 | ribosomal protein S18 identical to GB       | 40S ribosomal protein S15A (RPS15A)          | 3836 | 4384 | 4792 | 4487 | 4922 | 4141 | 4337 | 4516 | 0.86 | 0.642725 | 3966     | 3945 | 4223 | 4992 | 4437 | 3982 | 4608 | 4419 | 4045 | 4488 | 0.90 | 0.098786 | 4470 | 0.90 | 0.235707 |
| 261417_at   | At1g07700 | Expressed protein, supported by cDNA        | thioredoxin family protein                   | 173  | 266  | 254  | 303  | 290  | 256  | 231  | 289  | 0.80 | 0.158251 | 242      | 268  | 271  | 458  | 353  | 292  | 303  | 305  | 260  | 342  | 0.76 | 0.095306 | 368  | 0.71 | 0.094117 |
| 261418_at   | At1g07830 | mitochondrial ribosomal protein, puta       | ribosomal protein L29 family protein         | 538  | 747  | 795  | 709  | 903  | 679  | 694  | 764  | 0.91 | 0.542853 | 744      | 844  | 787  | 1079 | 844  | 820  | 827  | 808  | 792  | 876  | 0.90 | 0.283987 | 914  | 0.87 | 0.233770 |
| 261419_at   | At1g07840 | hypothetical protein predicted by genei     | leucine zipper factor-related                | 174  | 209  | 227  | 231  | 227  | 211  | 203  | 223  | 0.91 | 0.303256 | 202      | 235  | 231  | 236  | 223  | 238  | 223  | 202  | 232  | 238  | 0.93 | 0.623978 | 256  | 0.87 | 0.415305 |
| 261420_at   | At1g07720 | fatty acid elongase 3-ketoacyl-CoA svr      | beta-ketoacyl-CoA synthase family prot       | 37   | 44   | 52   | 52   | 45   | 32   | 44   | 43   | 1.03 | 0.864425 | 104      | 118  | 111  | 87   | 62   | 52   | 74   | 65   | 111  | 68   | 1.64 | 0.002071 | 67   | 1.66 | 0.016269 |
| 261421_at   | At1g18840 | hypothetical protein similar to unknown     | calmodulin-binding family protein            | 230  | 263  | 264  | 341  | 344  | 275  | 252  | 320  | 0.79 | 0.054902 | 216      | 185  | 237  | 350  | 277  | 237  | 277  | 273  | 213  | 283  | 0.75 | 0.040992 | 288  | 0.74 | 0.109118 |
| 261422_at   | At1g18730 | unknown protein                             | expressed protein                            | 337  | 61   | 60   | 48   | 49   | 44   | 51   | 47   | 1.09 | 0.687452 | 29       | 33   | 38   | 40   | 28   | 34   | 36   | 34   | 33   | 34   | 0.96 | 0.677449 | 34   | 0.97 | 0.843601 |
| 261423_at   | At1g18750 | homodomain transcription factor, puta       | MAOS-box protein (AGL65)                     | 56   | 71   | 84   | 77   | 84   | 69   | 70   | 77   | 0.92 | 0.525854 | 55       | 48   | 63   | 60   | 54   | 52   | 54   | 60   | 56   | 58   | 0.96 | 0.610315 | 55   | 1.01 | 0.953241 |
| 261424_at   | At1g18700 | unknown protein                             | unknown protein                              | 347  | 457  | 447  | 421  | 435  | 386  | 417  | 414  | 1.01 | 0.398402 | 360      | 315  | 389  | 393  | 347  | 300  | 394  | 380  | 348  | 363  | 0.96 | 0.604167 | 347  | 1.00 | 0.967449 |
| 261425_at   | At1g18880 | peptide transporter, putative similar to    | proton-dependent oligopeptide transport      | 81   | 95   | 102  | 137  | 142  | 123  | 93   | 134  | 0.69 | 0.058773 | 88       | 79   | 89   | 142  | 117  | 110  | 109  | 115  | 85   | 119  | 0.72 | 0.007635 | 123  | 0.69 | 0.021895 |
| 261426_at   | At1g18880 | unknown protein, contains similarity to     | L HNH endonuclease domain-containing c       | 116  | 164  | 170  | 159  | 178  | 152  | 150  | 163  | 0.92 | 0.537727 | 133      | 158  | 159  | 183  | 145  | 146  | 157  | 153  | 150  | 157  | 0.96 | 0.552374 | 158  | 0.95 | 0.617328 |
| 261427_at   | At1g18670 | protein kinase, putative similar to CRK     | protein kinase family protein                | 48   | 127  | 112  | 113  | 124  | 106  | 101  | 114  | 0.88 | 0.338557 | 58       | 68   | 76   | 87   | 69   | 61   | 99   | 82   | 96   | 80   | 0.85 | 0.255445 | 72   | 0.93 | 0.622539 |
| 261428_at   | At1g18820 | isochlorogenic synthase, putative simil     | isochlorogenic synthase, putative / isoch    | 46   | 51   | 73   | 81   | 73   | 61   | 52   | 63   | 0.95 | 0.507518 | 41       | 35   | 45   | 40   | 42   | 40   | 42   | 40   | 41   | 41   | 0.95 | 0.963331 | 43   | 0.95 | 0.725170 |
| 261429_at   | At1g18870 | hypothetical protein contains similarity    | WRKY family transcription factor             | 14   | 9    | 17   | 15   | 15   | 12   | 13   | 14   | 0.85 | 0.708600 | 10       | 14   | 12   | 13   | 10   | 16   | 14   | 12   | 12   | 13   | 0.92 | 0.565140 | 13   | 0.92 | 0.657126 |
| 261430_at   | At1g18830 | hypothetical protein predicted by genei     | transducin family protein / WD-40 repeat     | 40   | 49   | 61   | 55   | 49   | 52   | 50   | 52   | 0.97 | 0.801249 | 35       | 37   | 40   | 27   | 30   | 35   | 36   | 35   | 37   | 33   | 1.15 | 0.100074 | 31   | 1.21 | 0.074786 |
| 261431_at   | At1g18710 | Myb-related transcription factor mixta,     | myb family transcription factor (MYB47)      | 18   | 24   | 31   | 29   | 29   | 30   | 24   | 29   | 0.83 | 0.246421 | 26       | 22   | 32   | 31   | 23   | 28   | 38   | 32   | 26   | 30   | 0.87 | 0.336562 | 28   | 0.96 | 0.780866 |
| 261404_at   | At1g19600 | alcohol dehydrogenase, putative simil       | alcohol dehydrogenase C4-type (RPS15A)       | 1098 | 1204 | 1023 | 1052 | 1052 | 922  | 1212 | 1012 | 1.20 | 0.076187 | 1134     | 1207 | 1182 | 1112 | 944  | 902  | 869  | 818  | 1174 | 929  | 1.26 | 0.011724 | 986  | 1.19 | 0.040506 |
| 261405_at   | At1g18740 | unknown protein, supported by full-length   | expressed protein                            | 773  | 792  | 1109 | 1208 | 1274 | 732  | 925  | 1072 | 0.86 | 0.493308 | 195      | 194  | 184  | 248  | 236  | 208  | 329  | 293  | 191  | 263  | 0.73 | 0.047201 | 230  | 0.83 | 0.033781 |
| 261406_at   | At1g18800 | unknown protein, contains similarity to     | a nucleosome assembly protein (NAP) fan      | 274  | 373  | 315  | 386  | 424  | 331  | 320  | 380  | 0.84 | 0.202391 | 320      | 326  | 326  | 465  | 393  | 362  | 350  | 330  | 324  | 380  | 0.85 | 0.126831 | 406  | 0.80 | 0.054412 |
| 261407_at   | At1g18810 | unknown protein, supported by full-length   | phosphorylase kinase substrate-related       | 27   | 46   | 53   | 66   | 58   | 55   | 45   | 60   | 0.76 | 0.086168 | 41       | 44   | 41   | 39   | 40   | 40   | 43   | 39   | 42   | 40   | 1.04 | 0.166481 | 40   | 1.06 | 0.094677 |
| 261376_at   | At1g18660 | hypothetical protein contains similarity    | to protein kinase C3HC4-type (RNG finger) fa | 129  | 279  | 260  | 298  | 313  | 259  | 246  | 290  | 0.85 | 0.203377 | 211      | 228  | 222  | 325  | 257  | 224  | 263  | 240  | 220  | 262  | 0.84 | 0.115169 | 296  | 0.82 | 0.176043 |
| 261377_at   | At1g18850 | unknown protein, supported by full-length   | expressed protein                            | 228  | 234  | 266  | 296  | 277  | 255  | 243  | 283  | 0.86 | 0.091846 | 189      | 237  | 269  | 243  | 281  | 276  | 218  | 279  | 278  | 278  | 0.78 | 0.026194 | 280  | 0.78 | 0.097398 |
| 261378_at   | At1g18890 | calcium-dependent protein kinase, out       | calcium-dependent protein kinase 1 (CD       | 308  | 353  | 419  | 390  | 428  | 344  | 360  | 387  | 0.93 | 0.533325 | 203      | 171  | 195  | 270  | 214  | 185  | 202  | 200  | 189  | 214  | 0.88 | 0.279018 | 223  | 0.85 | 0.280207 |
| 261379_at   | At1g18720 | unknown protein similar to YOLO10w-l        | expressed protein                            | 338  | 425  | 482  | 586  | 649  | 555  | 413  | 597  | 0.69 | 0.024422 | 532      | 621  | 620  | 825  | 665  | 630  | 679  | 642  | 591  | 688  | 0.86 | 0.107227 | 707  | 0.84 | 0.157062 |
| 261380_at   | At1g05400 | hypothetical protein predicted by genei     | hypothetical protein                         | 429  | 53   | 57   | 66   | 30   | 47   | 53   | 74   | 0.71 | 0.060424 | 44       | 64   | 44   | 58   | 44   | 42   | 43   | 44   | 38   | 49   | 0.82 | 0.132637 | 43   | 1.11 | 0.277274 |
| 261381_at   | At1g05400 | hypothetical protein predicted by genei     | DNA helicase SDC3 (SDE3)                     | 120  | 167  | 177  | 202  | 197  | 152  | 148  | 184  | 0.81 | 0.194479 | 103      | 87   | 113  | 140  | 108  | 140  | 130  | 125  | 80   | 117  | 0.86 | 0.309650 | 117  | 0.86 | 0.309650 |
| 261382_at   | At1g05470 | hypothetical protein contains similarity    | 1 endonuclease/exonuclease/phosphatase       | 59   | 83   | 67   | 91   | 116  | 79   | 69   | 95   | 0.73 | 0.115205 | 24       | 24   | 31   | 40   | 32   | 31   | 34   | 26   | 26   | 33   | 0.81 | 0.113566 | 34   | 0.77 | 0.094213 |
| 261383_at   | At1g05380 | hypothetical protein predicted by genei     | PHD finger expression factor, putative       | 221  | 286  | 350  | 381  | 402  | 306  | 285  | 363  | 0.79 | 0.175402 | 195      | 173  | 205  | 282  | 242  | 207  | 247  | 219  | 191  | 239  | 0.80 | 0.040482 | 244  | 0.79 | 0.089205 |
| 261384_at   | At1g05440 | hypothetical protein predicted by genei     | transcription factor, putative               | 114  | 143  | 124  | 164  | 185  | 139  | 127  | 163  | 0.78 | 0.088985 | 99       | 83   | 108  | 136  | 11   |      |      |      |      |      |      |          |      |      |          |

|             |           |                                                                                        |       |      |      |      |      |      |      |      |          |          |      |      |      |      |      |      |      |      |      |      |          |          |          |          |          |          |
|-------------|-----------|----------------------------------------------------------------------------------------|-------|------|------|------|------|------|------|------|----------|----------|------|------|------|------|------|------|------|------|------|------|----------|----------|----------|----------|----------|----------|
| 261342_at   | At1g52950 | putative replication protein similar to re1 replication protein-related                | 29    | 38   | 40   | 33   | 37   | 32   | 36   | 34   | 1.04     | 0.724205 | 28   | 34   | 34   | 37   | 26   | 28   | 51   | 40   | 32   | 36   | 0.88     | 0.517452 | 30       | 1.06     | 0.638325 |          |
| 261343_s_at | At3g43350 | unknown protein hyothetical proteins - I hyothetical protein /// helicase-related      | 34    | 47   | 56   | 42   | 41   | 61   | 46   | 48   | 0.96     | 0.825200 | 35   | 44   | 48   | 34   | 22   | 21   | 36   | 29   | 42   | 29   | 1.48     | 0.033952 | 26       | 1.65     | 0.042163 |          |
| 261313_at   | At1g52970 | hyothetical protein predicted by oenic hyothetical protein                             | 329   | 489  | 634  | 50   | 55   | 43   | 484  | 49   | 9.86     | 0.007805 | 1903 | 2024 | 1714 | 51   | 47   | 98   | 47   | 50   | 1881 | 59   | 32.10    | 0.000000 | 68       | 28.68    | 0.000038 |          |
| 261314_at   | At1g52980 | hyothetical protein similar to GTP-binding family protein                              | 639   | 678  | 638  | 678  | 549  | 607  | 688  | 622  | 0.84     | 0.741390 | 466  | 434  | 481  | 534  | 486  | 481  | 534  | 486  | 481  | 534  | 0.86     | 0.040798 | 504      | 0.86     | 0.174692 |          |
| 261315_at   | At1g53170 | AP2 domain containing protein, putative ethylene-responsive element-binding fac        | 252   | 409  | 477  | 645  | 813  | 525  | 379  | 661  | 0.57     | 0.007887 | 277  | 273  | 306  | 487  | 416  | 412  | 367  | 353  | 286  | 407  | 0.70     | 0.009247 | 438      | 0.65     | 0.004360 |          |
| 261316_at   | At1g53165 | MAP kinase BMAP4K alpha1, putative protein kinase, putative                            | 155   | 229  | 237  | 227  | 274  | 212  | 207  | 238  | 0.87     | 0.391950 | 191  | 195  | 194  | 274  | 198  | 194  | 220  | 213  | 193  | 220  | 0.88     | 0.216545 | 222      | 0.87     | 0.333343 |          |
| 261317_at   | At1g53030 | cytochrome c oxidase assembly prot cytochrome c oxidase cooper chaperon                | 75    | 116  | 116  | 101  | 122  | 85   | 102  | 103  | 1.00     | 0.984911 | 94   | 119  | 97   | 150  | 126  | 118  | 125  | 113  | 103  | 126  | 0.82     | 0.089308 | 131      | 0.79     | 0.090310 |          |
| 261318_at   | At1g53025 | hyothetical protein, supported by full-length expressed protein                        | 102   | 134  | 134  | 122  | 132  | 102  | 134  | 122  | 0.98     | 0.391950 | 191  | 195  | 194  | 274  | 198  | 194  | 220  | 213  | 193  | 220  | 0.88     | 0.216545 | 222      | 0.87     | 0.333343 |          |
| 261319_at   | At1g53090 | chytocrome A succesor sca1, outati WD-40 repeat family protein / chytocro              | 124   | 178  | 182  | 187  | 205  | 149  | 162  | 180  | 0.90     | 0.497913 | 146  | 132  | 161  | 209  | 189  | 161  | 172  | 174  | 146  | 181  | 0.81     | 0.032803 | 186      | 0.79     | 0.068100 |          |
| 261320_at   | At1g53120 | hyothetical protein predicted by cDNA: RNA-binding S4 domain-containing o              | 183   | 233  | 285  | 230  | 260  | 216  | 234  | 235  | 0.99     | 0.959725 | 233  | 222  | 281  | 235  | 219  | 218  | 223  | 217  | 235  | 0.92 | 0.351023 | 245      | 0.89     | 0.283619 |          |          |
| 261321_at   | At1g44740 | hyothetical protein predicted by oenic expressed protein                               | 47    | 63   | 71   | 66   | 81   | 66   | 61   | 71   | 0.85     | 0.236972 | 50   | 63   | 65   | 67   | 61   | 62   | 46   | 51   | 59   | 58   | 1.03     | 0.782701 | 64       | 0.93     | 0.435252 |          |
| 261322_at   | At1g44750 | hyothetical protein predicted by oenic purine permease family protein                  | 575   | 745  | 970  | 1062 | 812  | 699  | 948  | 0.74 | 0.059659 | 635      | 570  | 589  | 940  | 817  | 697  | 840  | 580  | 598  | 581  | 0.72 | 0.035175 | 818      | 0.73     | 0.030626 |          |          |
| 261323_at   | At1g44760 | hyothetical protein predicted by oenic putative stress protein (USP) family prc        | 1740  | 2196 | 2955 | 2165 | 2503 | 1986 | 2007 | 2189 | 0.96     | 0.738690 | 1538 | 1547 | 1629 | 2389 | 1872 | 1960 | 1956 | 1964 | 1571 | 2006 | 0.78     | 0.018497 | 2040     | 0.77     | 0.056714 |          |
| 261324_at   | At1g44770 | unknown protein                                                                        | 480   | 657  | 913  | 752  | 842  | 711  | 683  | 768  | 0.89     | 0.552628 | 512  | 764  | 696  | 938  | 669  | 938  | 669  | 938  | 669  | 938  | 0.86     | 0.253159 | 760      | 0.86     | 0.427107 |          |
| 261325_at   | At1g44780 | hyothetical protein predicted by oenic expressed protein                               | 134   | 170  | 161  | 196  | 227  | 173  | 155  | 199  | 0.78     | 0.083385 | 135  | 134  | 150  | 217  | 166  | 151  | 164  | 150  | 139  | 170  | 0.82     | 0.124408 | 178      | 0.78     | 0.140153 |          |
| 261326_s_at | At1g44180 | aminocaseinase, putative similar to amin aminocaseinase, putative / N-act-L-amino      | 217   | 223  | 261  | 252  | 287  | 209  | 214  | 249  | 0.86     | 0.402145 | 195  | 236  | 214  | 295  | 227  | 241  | 232  | 224  | 215  | 244  | 0.88     | 0.185299 | 254      | 0.85     | 0.174081 |          |
| 261327_at   | At1g44830 | transcription factor, putative contains # AP2 domain-containing transcription fac      | 42    | 52   | 50   | 54   | 50   | 53   | 48   | 52   | 0.92     | 0.273996 | 47   | 56   | 57   | 58   | 44   | 50   | 49   | 53   | 54   | 51   | 1.06     | 0.456641 | 51       | 1.06     | 0.579740 |          |
| 261328_at   | At1g44835 | unknown protein                                                                        | 241   | 279  | 256  | 313  | 315  | 255  | 259  | 294  | 0.88     | 0.191007 | 265  | 256  | 284  | 285  | 308  | 294  | 275  | 299  | 276  | 265  | 309      | 0.86     | 0.209090 | 322      | 0.82     | 0.216839 |
| 261329_at   | At1g44890 | hyothetical protein predicted by oenic expressed protein                               | 374   | 264  | 275  | 298  | 316  | 245  | 245  | 286  | 0.85     | 0.277060 | 202  | 202  | 208  | 300  | 230  | 221  | 198  | 222  | 204  | 235  | 0.87     | 0.248687 | 252      | 0.81     | 0.146677 |          |
| 261330_at   | At1g44900 | transcription factor, putative similar to / DNA replication licensing factor, putative | 196   | 355  | 317  | 444  | 437  | 386  | 349  | 423  | 0.83     | 0.043035 | 257  | 169  | 281  | 340  | 264  | 210  | 251  | 233  | 236  | 260  | 0.91     | 0.555128 | 271      | 0.87     | 0.521950 |          |
| 261331_at   | At1g44950 | hyothetical protein predicted by oenic hyothetical protein                             | 100   | 128  | 128  | 151  | 175  | 160  | 119  | 162  | 0.73     | 0.409049 | 120  | 112  | 115  | 166  | 129  | 115  | 158  | 149  | 116  | 143  | 0.81     | 0.071081 | 137      | 0.85     | 0.244478 |          |
| 261332_s_at | At1g44840 | hyothetical protein contains similarit / Mutator-like transposase famiv /// oenic      | 7     | 6    | 10   | 6    | 4    | 6    | 6    | 8    | 1.34     | 0.257701 | 7    | 13   | 3    | 4    | 6    | 7    | 8    | 3    | 8    | 6    | 1.36     | 0.440233 | 6        | 1.35     | 0.551447 |          |
| 261333_at   | At1g44910 | hyothetical protein predicted by oenic FF domain-containing protein / WW do            | 205   | 264  | 273  | 244  | 267  | 249  | 247  | 253  | 0.98     | 0.810187 | 149  | 143  | 190  | 198  | 152  | 123  | 161  | 172  | 161  | 161  | 1.00     | 0.971576 | 158      | 1.02     | 0.924132 |          |
| 261334_at   | At1g44960 | unknown protein                                                                        | 147   | 194  | 214  | 227  | 287  | 210  | 185  | 241  | 0.77     | 0.139521 | 217  | 221  | 220  | 327  | 291  | 266  | 259  | 240  | 219  | 276  | 0.79     | 0.028763 | 295      | 0.74     | 0.012895 |          |
| 261335_at   | At1g44800 | nuclein protein, putative similar to GB: nuclein MN21 family protein                   | 18    | 33   | 68   | 29   | 34   | 29   | 40   | 30   | 1.32     | 0.554424 | 112  | 131  | 69   | 217  | 191  | 145  | 321  | 283  | 104  | 232  | 0.45     | 0.027225 | 185      | 0.56     | 0.044770 |          |
| 261336_at   | At1g44790 | unknown protein, supported by full-length ChAc-like family protein                     | 329   | 441  | 410  | 479  | 562  | 513  | 394  | 518  | 0.76     | 0.039462 | 428  | 504  | 480  | 745  | 617  | 569  | 570  | 578  | 471  | 616  | 0.76     | 0.022427 | 643      | 0.73     | 0.038840 |          |
| 261337_at   | At1g44810 | unknown protein; supported by cDNA: expressed protein                                  | 518   | 719  | 798  | 884  | 896  | 748  | 685  | 843  | 0.81     | 0.156611 | 484  | 475  | 577  | 809  | 590  | 545  | 657  | 670  | 512  | 654  | 0.78     | 0.068639 | 648      | 0.79     | 0.195332 |          |
| 261338_at   | At1g44920 | hyothetical protein predicted by oenic expressed protein                               | 238   | 313  | 301  | 359  | 377  | 315  | 277  | 350  | 0.79     | 0.107744 | 256  | 314  | 363  | 456  | 348  | 331  | 322  | 306  | 311  | 353  | 0.88     | 0.359482 | 378      | 0.82     | 0.248069 |          |
| 261339_at   | At1g53710 | protein kinase, putative similar to man leucine-rich repeat transmembrane prot         | 21    | 24   | 32   | 25   | 32   | 24   | 26   | 27   | 0.95     | 0.780393 | 20   | 23   | 23   | 22   | 25   | 22   | 27   | 24   | 22   | 24   | 0.92     | 0.207816 | 23       | 0.96     | 0.524765 |          |
| 261340_at   | At1g53720 | hyothetical protein predicted by oenic pumilio/PuF RNA-binding domain-contai           | 29    | 42   | 42   | 42   | 42   | 42   | 42   | 42   | 0.81     | 0.026855 | 33   | 30   | 41   | 38   | 42   | 31   | 35   | 32   | 33   | 36   | 1.06     | 0.522701 | 33       | 1.02     | 0.706801 |          |
| 261341_at   | At1g53740 | hyothetical protein predicted by oenic pseudogene, similar to putative beta-1.3        | 9     | 10   | 12   | 12   | 12   | 9    | 11   | 11   | 0.97     | 0.709955 | 20   | 15   | 16   | 19   | 21   | 15   | 9    | 11   | 17   | 15   | 1.11     | 0.625215 | 18       | 0.91     | 0.557495 |          |
| 261342_at   | At1g53750 | hyothetical protein predicted by oenic pumilio/PuF RNA-binding domain-contai           | 22    | 21   | 27   | 22   | 31   | 29   | 23   | 27   | 0.86     | 0.342215 | 22   | 23   | 27   | 19   | 21   | 22   | 23   | 24   | 24   | 22   | 1.10     | 0.216895 | 20       | 1.17     | 0.108032 |          |
| 261343_s_at | At1g53770 | hyothetical protein predicted by oenic Upf1/Protease family protein /// Upf1 prot      | 6     | 7    | 10   | 6    | 8    | 6    | 8    | 7    | 1.17     | 0.370922 | 4    | 4    | 7    | 3    | 6    | 10   | 7    | 8    | 3    | 5    | 0.73     | 0.304065 | 8        | 0.65     | 0.177112 |          |
| 261344_at   | At1g53790 | hyothetical protein predicted by oenic C22orf104 retrotransposon family (Atha          | 31    | 31   | 33   | 32   | 32   | 31   | 33   | 35   | 0.96     | 0.297864 | 22   | 26   | 33   | 23   | 24   | 23   | 28   | 27   | 27   | 23   | 1.09     | 0.423701 | 23       | 1.16     | 0.294107 |          |
| 261345_at   | At1g53720 | Ca2+-dependent membrane-binding or annexin 1 (ANN1)                                    | 100   | 206  | 198  | 141  | 128  | 96   | 168  | 122  | 1.38     | 0.273697 | 362  | 449  | 367  | 119  | 112  | 113  | 109  | 89   | 393  | 108  | 3.62     | 0.000012 | 115      | 3.42     | 0.000065 |          |
| 261346_at   | At1g53780 | unknown protein: supported by cDNA: expressed protein                                  | 852   | 1163 | 1126 | 1260 | 1387 | 1123 | 1047 | 1257 | 0.83     | 0.167049 | 1365 | 1417 | 1290 | 1652 | 1281 | 1160 | 1437 | 1407 | 1357 | 1387 | 0.98     | 0.799168 | 1364     | 0.99     | 0.965767 |          |
| 261347_at   | At1g37020 | hyothetical protein predicted by oenic Upf1/Protease family protein                    | 23    | 24   | 36   | 33   | 28   | 30   | 28   | 30   | 0.92     | 0.631896 | 17   | 21   | 24   | 18   | 18   | 14   | 17   | 20   | 21   | 18   | 1.17     | 0.175834 | 17       | 1.22     | 0.196712 |          |
| 261348_at   | At1g37010 | hyothetical protein predicted by oenic hyothetical protein                             | 6     | 8    | 6    | 6    | 7    | 6    | 8    | 6    | 0.94     | 0.409049 | 10   | 10   | 8    | 9    | 8    | 10   | 9    | 11   | 10   | 11   | 1.06     | 0.557501 | 9        | 1.06     | 0.200865 |          |
| 261349_at   | At1g37000 | hyothetical protein predicted by oenic hyothetical protein                             | 16    | 24   | 29   | 25   | 27   | 29   | 23   | 27   | 0.85     | 0.357716 | 18   | 25   | 25   | 21   | 19   | 22   | 31   | 24   | 22   | 23   | 0.95     | 0.731547 | 21       | 1.07     | 0.552193 |          |
| 261350_at   | At1g36990 | hyothetical protein predicted by oenic expressed protein                               | 153   | 179  | 193  | 203  | 214  | 178  | 175  | 198  | 0.88     | 0.212473 | 127  | 107  | 148  | 147  | 139  | 123  | 158  | 161  | 127  | 146  | 0.88     | 0.202490 | 136      | 0.94     | 0.558949 |          |
| 261351_at   | At1g36970 | hyothetical protein predicted by oenic hyothetical protein                             | 21    | 22   | 33   | 30   | 33   | 33   | 25   | 32   | 0.79     | 0.176626 | 29   | 20   | 27   | 29   | 20   | 21   | 25   | 25   | 25   | 25   | 1.01     | 0.949420 | 25       | 1.01     | 0.957076 |          |
| 261352_at   | At1g36940 | hyothetical protein predicted by oenic hyothetical protein                             | 39    | 42   | 41   | 46   | 31   | 38   | 41   | 45   | 0.83     | 0.671298 | 37   | 28   | 39   | 36   | 30   | 30   | 30   | 30   | 30   | 30   | 1.15     | 0.139190 | 32       | 1.10     | 0.445145 |          |
| 261353_at   | At1g36980 | unknown protein, supported by cDNA: expressed protein                                  | 10231 | 1410 | 1576 | 1410 | 1715 | 1237 | 1336 | 1454 | 0.92     | 0.612665 | 1133 | 1159 | 1089 | 1491 | 1315 | 1263 | 1470 | 1452 | 1127 | 1308 | 0.81     | 0.059023 | 1332     | 0.83     | 0.033407 |          |
| 261354_at   | At1g42430 | unknown protein                                                                        | 167   | 228  | 254  | 221  | 275  | 201  | 216  | 232  | 0.93     | 0.663970 | 194  | 201  | 215  | 261  | 235  | 215  | 291  | 277  | 203  | 256  | 0.79     | 0.031899 | 237      | 0.86     | 0.081292 |          |
| 261355_at   | At1g48450 | unknown protein                                                                        | 618   | 632  | 601  | 636  | 457  | 552  | 565  | 598  | 0.88     | 0.893831 | 497  | 560  | 486  | 700  | 517  | 524  | 557  | 579  | 514  | 575  | 0.89     | 0.242510 | 500      | 0.89     | 0.359741 |          |
| 261356_at   | At1g48460 | unknown protein                                                                        | 338   | 378  | 437  | 528  | 543  | 442  | 384  | 504  | 0.76     | 0.048131 | 368  | 421  | 411  | 564  | 477  | 434  | 447  | 449  | 400  | 474  | 0.84     | 0.067714 | 492      | 0.81     | 0.090986 |          |
| 261357_at   | At1g48500 | hyothetical protein predicted by oenic expressed protein                               | 17    | 14   | 16   | 24   | 21   | 17   | 15   | 17   | 0.81     | 0.300545 | 10   | 10   | 8    | 9    | 8    | 10   | 9    | 11   | 10   | 11   | 1.06     | 0.423701 | 23       | 1.16     | 0.294107 |          |
| 261358_at   | At1g48510 | cytochrome c oxidase assembly prot cytochrome c oxidase assembly prot                  | 14    | 31   | 37   | 45   | 40   | 41   | 38   | 43   | 0.89     | 0.349085 | 30   | 27   | 32   | 33   | 28   | 31   | 29   | 26   | 30   | 29   |          |          |          |          |          |          |

|             |           |                                                                                            |      |      |      |      |      |      |      |      |      |          |          |      |      |      |      |      |      |      |      |      |      |          |          |      |          |          |
|-------------|-----------|--------------------------------------------------------------------------------------------|------|------|------|------|------|------|------|------|------|----------|----------|------|------|------|------|------|------|------|------|------|------|----------|----------|------|----------|----------|
| 261247_at   | At1g20070 | hypothetical protein predicted by gene expressed protein                                   | 73   | 119  | 154  | 183  | 136  | 171  | 115  | 163  | 0.71 | 0.150970 | 122      | 90   | 116  | 133  | 112  | 102  | 96   | 85   | 109  | 106  | 1.03 | 0.792021 | 116      | 0.94 | 0.646230 |          |
| 261248_at   | At1g20030 | calreticulin, putative similar to GB:AAF pathogenesis-related thaumatin family p           | 127  | 151  | 157  | 154  | 159  | 119  | 145  | 144  | 1.01 | 0.945377 | 154      | 177  | 138  | 185  | 148  | 138  | 150  | 143  | 157  | 153  | 1.03 | 0.784980 | 157      | 1.00 | 0.986643 |          |
| 261218_at   | At1g20020 | ferredoxin-NADP+ reductase precursor ferredoxin-NADPH+ reductase, putative                 | 262  | 252  | 216  | 238  | 203  | 159  | 210  | 200  | 1.05 | 0.779843 | 307      | 352  | 349  | 452  | 285  | 303  | 374  | 368  | 336  | 357  | 0.94 | 0.628500 | 347      | 0.97 | 0.849465 |          |
| 261219_at   | At1g19980 | hypothetical protein predicted by gene cytochrome p-450 related                            | 141  | 207  | 203  | 261  | 183  | 220  | 183  | 220  | 0.81 | 0.209075 | 144      | 131  | 148  | 137  | 112  | 169  | 143  | 176  | 137  | 156  | 0.94 | 0.139921 | 176      | 0.94 | 0.949576 |          |
| 261220_at   | At1g19970 | ER lumen protein-retaining receptor sin ER lumen protein retaining receptor fam            | 301  | 309  | 442  | 396  | 420  | 389  | 351  | 402  | 0.87 | 0.335764 | 309      | 375  | 420  | 479  | 379  | 366  | 380  | 358  | 368  | 390  | 0.94 | 0.581938 | 405      | 0.91 | 0.503249 |          |
| 261221_at   | At1g19960 | hypothetical protein predicted by gene expressed protein                                   | 134  | 200  | 36   | 34   | 49   | 39   | 30   | 41   | 0.74 | 0.133994 | 24       | 20   | 25   | 31   | 22   | 30   | 34   | 30   | 23   | 29   | 0.80 | 0.082275 | 28       | 0.84 | 0.253474 |          |
| 261222_at   | At1g20120 | anion-specific proline-rich protein APG family II extracellular lipase, putative           | 25   | 35   | 37   | 36   | 42   | 34   | 32   | 37   | 0.87 | 0.334652 | 35       | 30   | 39   | 36   | 29   | 32   | 44   | 38   | 35   | 36   | 0.97 | 0.800224 | 32       | 1.07 | 0.526791 |          |
| 261223_at   | At1g19860 | hypothetical protein predicted by gene absent-absent responsive HVA22 family t             | 42   | 61   | 64   | 46   | 47   | 51   | 62   | 57   | 0.81 | 0.090717 | 57       | 68   | 69   | 71   | 67   | 61   | 71   | 67   | 61   | 71   | 0.81 | 0.124238 | 62       | 0.74 | 0.065776 |          |
| 261224_at   | At1g20160 | subtilisin-like serine protease similar to subtilase family protein                        | 75   | 102  | 108  | 205  | 172  | 198  | 95   | 162  | 0.50 | 0.002424 | 146      | 122  | 166  | 271  | 199  | 157  | 186  | 177  | 145  | 198  | 0.73 | 0.101713 | 200      | 0.69 | 0.145536 |          |
| 261225_at   | At1g20100 | unknown protein : supported by full-length expressed protein                               | 434  | 552  | 488  | 601  | 616  | 485  | 491  | 567  | 0.87 | 0.231159 | 447      | 416  | 465  | 674  | 510  | 495  | 597  | 552  | 443  | 566  | 0.78 | 0.032906 | 560      | 0.79 | 0.119452 |          |
| 261226_at   | At1g20190 | expansin S2 sucrose, outative similar expantin, putative (EXP11)                           | 503  | 601  | 124  | 135  | 100  | 94   | 83   | 110  | 0.76 | 0.335378 | 199      | 234  | 210  | 234  | 194  | 252  | 255  | 252  | 214  | 247  | 0.90 | 0.222118 | 227      | 0.95 | 0.567355 |          |
| 261227_at   | At1g20200 | proteasome regulator subunit S3, put 26S proteasome regulator subunit S3. i                | 631  | 630  | 668  | 865  | 881  | 737  | 640  | 828  | 0.77 | 0.328289 | 549      | 534  | 610  | 636  | 683  | 573  | 621  | 600  | 564  | 683  | 0.85 | 0.182516 | 628      | 0.81 | 0.170238 |          |
| 261228_at   | At1g20050 | C-8, 7 steroid isomerase identical to GB:C-8, 7 steroid isomerase                          | 840  | 1033 | 1095 | 1088 | 1232 | 1065 | 898  | 1128 | 0.88 | 0.209322 | 943      | 1098 | 1059 | 1378 | 1158 | 1071 | 1047 | 1012 | 1034 | 1132 | 0.91 | 0.333043 | 1201     | 0.86 | 0.173418 |          |
| 261229_at   | At1g20090 | RAC-like GTP-binding protein ARACA1 / Rac-like GTP-binding protein (ARACA4) /              | 575  | 692  | 705  | 798  | 868  | 712  | 657  | 793  | 0.83 | 0.091562 | 765      | 834  | 839  | 1230 | 994  | 904  | 866  | 808  | 813  | 961  | 0.85 | 0.189900 | 1034     | 0.78 | 0.082866 |          |
| 261230_at   | At1g20010 | beta tubulin 1, putative similar to GB:A tubulin beta-5 chain (TUB5)                       | 401  | 510  | 403  | 448  | 569  | 357  | 438  | 458  | 0.96 | 0.794836 | 382      | 374  | 339  | 452  | 366  | 342  | 444  | 433  | 365  | 407  | 0.90 | 0.225898 | 386      | 0.94 | 0.581303 |          |
| 261231_at   | At1g20110 | unknown protein : supported by cDNA: zinc finger (FYVE type) family protein                | 457  | 529  | 534  | 605  | 636  | 573  | 507  | 605  | 0.84 | 0.033949 | 527      | 482  | 592  | 723  | 615  | 497  | 685  | 655  | 534  | 635  | 0.84 | 0.125383 | 612      | 0.87 | 0.344942 |          |
| 261232_at   | At1g20220 | unknown protein : supported by cDNA: expressed protein                                     | 294  | 318  | 265  | 352  | 363  | 244  | 292  | 363  | 0.81 | 0.030941 | 298      | 325  | 341  | 395  | 360  | 307  | 291  | 301  | 322  | 331  | 0.97 | 0.755439 | 354      | 0.91 | 0.316768 |          |
| 261233_at   | At1g32800 | hypothetical protein similar to hypotheII: PHD finger protein-related                      | 70   | 90   | 79   | 121  | 120  | 95   | 80   | 112  | 0.71 | 0.035221 | 45       | 50   | 45   | 50   | 43   | 46   | 49   | 54   | 46   | 48   | 0.96 | 0.506831 | 46       | 1.00 | 0.947844 |          |
| 261234_x_at | At1g32830 | hypothetical protein predicted by gene pseudogene, hypothetical protein III hvp            | 16   | 20   | 30   | 22   | 26   | 26   | 22   | 25   | 0.90 | 0.616998 | 16       | 11   | 22   | 16   | 17   | 14   | 20   | 15   | 16   | 16   | 1.00 | 0.996500 | 15       | 1.05 | 0.845003 |          |
| 261235_x_at | At1g32840 | hypothetical protein predicted by gene UPI1 protease family protein III pseudog            | 64   | 85   | 103  | 99   | 98   | 95   | 84   | 97   | 0.86 | 0.312945 | 41       | 48   | 58   | 62   | 51   | 46   | 53   | 58   | 49   | 54   | 0.92 | 0.421751 | 53       | 0.93 | 0.638351 |          |
| 261236_at   | At1g32880 | importin alpha, putative similar to impo importin alpha-1 subunit, putative                | 25   | 35   | 38   | 31   | 38   | 27   | 33   | 32   | 1.03 | 0.873856 | 27       | 31   | 30   | 25   | 23   | 27   | 33   | 30   | 29   | 28   | 1.06 | 0.514403 | 25       | 1.17 | 0.072017 |          |
| 261237_at   | At1g32980 | hypothetical protein contains similarly I subtilisin-like serine protease-related          | 29   | 29   | 47   | 44   | 44   | 43   | 35   | 43   | 0.81 | 0.220410 | 27       | 29   | 35   | 31   | 27   | 26   | 31   | 30   | 30   | 29   | 1.05 | 0.538249 | 28       | 1.08 | 0.463193 |          |
| 261238_at   | At1g32810 | hypothetical protein predicted by gene expressed protein                                   | 289  | 391  | 387  | 403  | 475  | 348  | 355  | 409  | 0.87 | 0.343301 | 413      | 324  | 385  | 489  | 489  | 416  | 455  | 435  | 374  | 457  | 0.82 | 0.023173 | 464      | 0.81 | 0.065651 |          |
| 261239_at   | At1g32930 | Avi9 elicitor response protein, outative galactosyltransferase family protein              | 611  | 750  | 753  | 906  | 895  | 707  | 705  | 857  | 0.82 | 0.076404 | 668      | 624  | 735  | 975  | 827  | 701  | 809  | 808  | 776  | 824  | 0.82 | 0.056942 | 834      | 0.81 | 0.137092 |          |
| 261240_at   | At1g32940 | subtilisin-like serine protease contains : subtilase family protein                        | 58   | 74   | 64   | 79   | 71   | 69   | 65   | 73   | 0.90 | 0.247001 | 60       | 62   | 64   | 75   | 69   | 70   | 74   | 69   | 62   | 71   | 0.87 | 0.002672 | 71       | 0.87 | 0.011280 |          |
| 261241_at   | At1g32950 | subtilisin-like serine protease contains : subtilase family protein                        | 28   | 31   | 36   | 32   | 34   | 36   | 31   | 34   | 0.93 | 0.406603 | 22       | 23   | 30   | 24   | 24   | 20   | 27   | 25   | 28   | 24   | 0.95 | 0.832501 | 24       | 1.05 | 0.665500 |          |
| 261242_at   | At1g32960 | subtilisin-like serine protease contains : subtilase family protein                        | 23   | 29   | 31   | 30   | 37   | 28   | 28   | 32   | 0.87 | 0.295468 | 19       | 25   | 25   | 21   | 23   | 22   | 22   | 20   | 23   | 22   | 1.07 | 0.354844 | 22       | 1.05 | 0.593359 |          |
| 261215_at   | At1g32970 | subtilase, outative similar to subtilase ( subtilase family protein                        | 17   | 15   | 20   | 20   | 21   | 22   | 18   | 21   | 0.84 | 0.090385 | 13       | 16   | 16   | 17   | 14   | 12   | 16   | 15   | 15   | 15   | 1.01 | 0.899666 | 14       | 1.06 | 0.618147 |          |
| 261216_at   | At1g33030 | catechol O-methyltransferase, outative C-O-methyltransferase family 2 protein              | 24   | 25   | 33   | 29   | 28   | 28   | 27   | 28   | 0.95 | 0.685211 | 21       | 21   | 25   | 21   | 23   | 21   | 25   | 26   | 22   | 23   | 0.96 | 0.625663 | 20       | 1.03 | 0.681366 |          |
| 261217_at   | At1g32860 | hypothetical protein contains similarly I ubonin-carboxyl-terminal hydrolase fan           | 52   | 62   | 61   | 55   | 52   | 62   | 60   | 57   | 0.80 | 0.209322 | 54       | 72   | 60   | 51   | 51   | 48   | 59   | 60   | 53   | 50   | 0.99 | 0.909478 | 48       | 0.94 | 0.766459 |          |
| 261187_at   | At1g32860 | beta-1,3-glucanase precursor, putative glycosyl hydrolase family 17 protein                | 90   | 97   | 101  | 142  | 189  | 146  | 96   | 159  | 0.60 | 0.015499 | 80       | 62   | 83   | 95   | 90   | 85   | 105  | 101  | 75   | 95   | 0.79 | 0.027950 | 90       | 0.84 | 0.116799 |          |
| 261188_at   | At1g33000 | hypothetical protein contains similarly I hypothetical protein                             | 19   | 22   | 29   | 23   | 27   | 26   | 23   | 25   | 0.93 | 0.564625 | 16       | 22   | 23   | 20   | 16   | 15   | 29   | 20   | 21   | 21   | 1.02 | 0.923749 | 17       | 1.21 | 0.243234 |          |
| 261189_at   | At1g33040 | hypothetical protein contains similarly I nascent polypeptide-associated compl             | 1017 | 1105 | 1077 | 1364 | 1462 | 1297 | 1066 | 1374 | 0.78 | 0.049804 | 1088     | 1082 | 1210 | 1509 | 1361 | 1133 | 1250 | 1267 | 1127 | 1304 | 0.86 | 0.093482 | 1335     | 0.84 | 0.150064 |          |
| 261190_at   | At1g32990 | ribosomal protein L11, outative similar ribosomal protein L11 family protein               | 244  | 497  | 411  | 505  | 543  | 416  | 419  | 489  | 0.86 | 0.239728 | 559      | 565  | 625  | 713  | 641  | 613  | 596  | 617  | 583  | 648  | 0.90 | 0.198991 | 676      | 0.86 | 0.196004 |          |
| 261191_at   | At1g32900 | starch synthase, outative similar to sta starch synthase, putative                         | 234  | 312  | 449  | 566  | 556  | 473  | 328  | 532  | 0.62 | 0.047288 | 320      | 274  | 346  | 828  | 527  | 422  | 579  | 506  | 313  | 572  | 0.55 | 0.031704 | 592      | 0.53 | 0.087017 |          |
| 261192_at   | At1g32870 | NAM, outative similar to NAM c no apical meristem (NAM) family protein                     | 124  | 172  | 234  | 206  | 225  | 179  | 180  | 204  | 0.88 | 0.503113 | 187      | 200  | 190  | 280  | 228  | 212  | 207  | 236  | 219  | 193  | 231  | 0.83     | 0.076516 | 233  | 0.83     | 0.165548 |
| 261193_at   | At1g32920 | unknown protein : supported by cDNA: expressed protein                                     | 445  | 862  | 1009 | 1197 | 1415 | 849  | 905  | 1154 | 0.78 | 0.224319 | 489      | 576  | 478  | 754  | 721  | 668  | 797  | 834  | 514  | 755  | 0.68 | 0.001715 | 714      | 0.72 | 0.007487 |          |
| 261194_at   | At1g32770 | unknown protein: contains Pfam profile DEAD/DEAF box helicase family protein               | 46   | 54   | 59   | 59   | 64   | 45   | 52   | 53   | 0.56 | 0.059778 | 45       | 33   | 44   | 52   | 50   | 44   | 57   | 52   | 41   | 51   | 0.94 | 0.577079 | 48       | 0.94 | 0.176887 |          |
| 261195_at   | At1g12820 | transport inhibitor response protein 1 (TIR1), t transport inhibitor response protein, put | 468  | 680  | 669  | 719  | 862  | 593  | 606  | 725  | 0.84 | 0.315686 | 450      | 406  | 488  | 648  | 600  | 490  | 603  | 620  | 448  | 592  | 0.76 | 0.010942 | 579      | 0.77 | 0.065745 |          |
| 261196_at   | At1g12860 | basic helix-loop-helix (bHLH) family prot                                                  | 287  | 482  | 392  | 347  | 401  | 282  | 387  | 344  | 1.13 | 0.546196 | 212      | 221  | 246  | 357  | 280  | 257  | 312  | 300  | 227  | 301  | 0.75 | 0.019449 | 288      | 0.76 | 0.088862 |          |
| 261197_at   | At1g12900 | outative calcium-binding protein, calret alcoraldehyde 3-phosphate dehydrogen              | 530  | 933  | 684  | 864  | 871  | 582  | 716  | 772  | 0.93 | 0.727169 | 759      | 803  | 835  | 1295 | 932  | 942  | 945  | 944  | 799  | 1012 | 0.79 | 0.088320 | 1057     | 0.76 | 0.101200 |          |
| 261198_at   | At1g12940 | nitrate transporter, outative similar to C high-affinity nitrate transporter, putative     | 33   | 33   | 33   | 45   | 38   | 39   | 46   | 37   | 1.1  | 0.80     | 0.445945 | 27   | 31   | 40   | 31   | 28   | 48   | 35   | 33   | 34   | 0.96 | 0.781645 | 29       | 0.91 | 0.455309 |          |
| 261199_at   | At1g12950 | unknown protein : supported by cDNA: MAT4 efflux family protein                            | 30   | 199  | 30   | 36   | 40   | 45   | 37   | 41   | 0.78 | 0.042647 | 31       | 38   | 38   | 29   | 28   | 29   | 31   | 28   | 29   | 28   | 0.93 | 0.444686 | 28       | 1.02 | 0.705066 |          |
| 261200_at   | At1g12960 | 60S ribosomal protein L27a, putative s 60S ribosomal protein L27a (RPL27aA)                | 51   | 38   | 55   | 64   | 66   | 53   | 48   | 61   | 0.78 | 0.117319 | 32       | 33   | 33   | 35   | 27   | 39   | 30   | 34   | 33   | 33   | 0.98 | 0.853055 | 34       | 0.97 | 0.755536 |          |
| 261201_at   | At1g12850 | unknown protein : supported by full-length phospholipase/bisphospholipase                  | 159  | 261  | 153  | 191  | 211  | 181  | 158  | 194  | 0.81 | 0.015885 | 160      | 174  | 182  | 281  | 209  | 169  | 210  | 210  | 172  | 216  | 0.80 | 0.124688 | 220      | 0.78 | 0.226301 |          |
| 261202_at   | At1g12910 | flower pigmentation protein ATAN11 c, high pigmentation protein (AN11)                     | 634  | 876  | 1022 | 869  | 959  | 697  | 844  | 842  | 1.00 | 0.985632 | 738      | 921  | 830  | 1173 | 850  | 796  | 1023 | 964  | 803  | 961  | 0.86 | 0.222139 | 940      | 0.88 | 0.441602 |          |
| 261203_at   | At1g12845 | Exocysted protein, supported by full-length expressed protein                              | 184  | 221  | 269  | 455  | 424  | 388  | 224  | 432  | 0.53 | 0.343094 | 379      | 427  | 406  | 568  | 627  | 568  | 615  | 646  | 617  | 678  | 0.66 | 0.023238 | 623      | 0.65 | 0.615778 |          |

|             |           |                                                                                     |                                                                               |      |      |      |      |      |      |      |      |          |          |      |      |      |      |      |      |      |      |         |      |          |          |      |          |          |
|-------------|-----------|-------------------------------------------------------------------------------------|-------------------------------------------------------------------------------|------|------|------|------|------|------|------|------|----------|----------|------|------|------|------|------|------|------|------|---------|------|----------|----------|------|----------|----------|
| 261129_at   | At1g04820 | tubulin alpha-2/alpha-4 chain identical 1                                           | tubulin alpha-2/alpha-4 chain (TUA2) //                                       | 1557 | 1719 | 1596 | 2111 | 2011 | 1860 | 1624 | 1994 | 0.81     | 0.013470 | 1329 | 1327 | 1592 | 1908 | 1592 | 1331 | 1680 | 1664 | 1416    | 1635 | 0.87     | 0.167139 | 1610 | 0.88     | 0.361423 |
| 261130_at   | At1g04870 | unknown protein : supported by cDNA: protein arginine N-methyltransferase fan       | unknown protein : supported by cDNA: protein arginine N-methyltransferase fan | 489  | 586  | 708  | 682  | 726  | 635  | 594  | 681  | 0.87     | 0.274377 | 449  | 463  | 535  | 710  | 542  | 520  | 491  | 480  | 482     | 548  | 0.88     | 0.306440 | 500  | 0.82     | 0.175010 |
| 261131_at   | At1g19835 | unknown protein                                                                     | expressed protein                                                             | 397  | 484  | 404  | 591  | 585  | 419  | 432  | 532  | 0.81     | 0.195613 | 380  | 350  | 412  | 539  | 454  | 341  | 465  | 484  | 380     | 457  | 0.83     | 0.141583 | 445  | 0.86     | 0.344367 |
| 261132_at   | At1g19800 | unknown protein                                                                     | expressed protein                                                             | 397  | 484  | 404  | 591  | 585  | 419  | 432  | 532  | 0.81     | 0.195613 | 380  | 350  | 412  | 539  | 454  | 341  | 465  | 484  | 380     | 457  | 0.83     | 0.141583 | 445  | 0.86     | 0.344367 |
| 261133_at   | At1g19720 | DWY7 protein identified to DWY7 orole isocalin lectin family protein                | centricotric                                                                  | 397  | 484  | 404  | 591  | 585  | 419  | 432  | 532  | 0.81     | 0.195613 | 380  | 350  | 412  | 539  | 454  | 341  | 465  | 484  | 380     | 457  | 0.83     | 0.141583 | 445  | 0.86     | 0.344367 |
| 261134_at   | At1g19630 | cytochrome P450, putative similar to G cytochrome P450 family protein               |                                                                               | 26   | 42   | 43   | 39   | 56   | 35   | 37   | 43   | 0.86     | 0.504608 | 33   | 23   | 26   | 29   | 29   | 33   | 39   | 30   | 27      | 32   | 0.86     | 0.208431 | 30   | 0.90     | 0.402964 |
| 261135_at   | At1g19610 | defensin AMP1, putative similar to PIR plant defensin-luson protein, putative (F    |                                                                               | 25   | 19   | 40   | 23   | 22   | 28   | 24   | 25   | 0.99     | 0.924910 | 21   | 20   | 32   | 19   | 29   | 20   | 19   | 20   | 18      | 24   | 1.27     | 0.128140 | 19   | 1.26     | 0.270518 |
| 261136_at   | At1g19610 | unknown protein similar to SP-P3677 ATP-dependent protein kinase family on          |                                                                               | 243  | 311  | 243  | 311  | 243  | 311  | 243  | 311  | 0.87     | 0.004541 | 201  | 201  | 334  | 201  | 201  | 334  | 201  | 201  | 334     | 201  | 0.89     | 0.250093 | 238  | 0.89     | 0.246978 |
| 261137_at   | At1g19630 | unknown protein, putative similar auxin-responsive protein, putative                |                                                                               | 64   | 85   | 73   | 89   | 106  | 73   | 74   | 89   | 0.83     | 0.246590 | 52   | 56   | 64   | 67   | 44   | 55   | 48   | 36   | 57      | 50   | 1.15     | 0.375518 | 55   | 1.03     | 0.816904 |
| 261138_at   | At1g19710 | hydroethical protein contains Pfam prof auxin-glucosyl transferase family 1 protein |                                                                               | 152  | 193  | 170  | 236  | 223  | 206  | 172  | 222  | 0.77     | 0.025726 | 155  | 164  | 199  | 285  | 201  | 173  | 226  | 198  | 173     | 217  | 0.80     | 0.156494 | 220  | 0.79     | 0.263309 |
| 261139_at   | At1g19700 | homeodomain protein, putative similar homeobox-leucine zipper family protein        |                                                                               | 260  | 44   | 52   | 59   | 56   | 55   | 49   | 56   | 0.88     | 0.157496 | 41   | 47   | 53   | 55   | 45   | 43   | 47   | 51   | 47      | 48   | 0.97     | 0.766523 | 48   | 0.98     | 0.890876 |
| 261140_at   | At1g19680 | unknown protein                                                                     | unknown protein                                                               | 260  | 44   | 52   | 59   | 56   | 55   | 49   | 56   | 0.88     | 0.157496 | 41   | 47   | 53   | 55   | 45   | 43   | 47   | 51   | 47      | 48   | 0.97     | 0.766523 | 48   | 0.98     | 0.890876 |
| 261141_at   | At1g19740 | unknown protein contains Pfam profile: ATP-dependent protein kinase La (LON) dom    |                                                                               | 128  | 178  | 169  | 128  | 169  | 128  | 169  | 128  | 0.82     | 0.164321 | 177  | 203  | 215  | 293  | 231  | 192  | 206  | 205  | 199     | 225  | 0.88     | 0.329845 | 239  | 0.83     | 0.269521 |
| 261142_at   | At1g19780 | cyclic nucleotide and calmodulin-regul cylic nucleotide-regulated ion channel,      |                                                                               | 12   | 17   | 19   | 17   | 16   | 16   | 16   | 16   | 0.99     | 0.946600 | 14   | 11   | 8    | 9    | 12   | 10   | 15   | 9    | 11      | 11   | 1.00     | 0.990246 | 10   | 1.05     | 0.796958 |
| 261143_at   | At1g19770 | unknown protein                                                                     | purine permease-related                                                       | 1228 | 1192 | 1648 | 1950 | 2251 | 1349 | 1356 | 1850 | 0.73     | 0.178248 | 977  | 821  | 604  | 906  | 822  | 804  | 1081 | 1022 | 740     | 927  | 0.80     | 0.078558 | 844  | 0.88     | 0.241304 |
| 261144_s_at | At1g19660 | unknown protein : supported by full-length wound-responsive family protein          |                                                                               | 505  | 1122 | 1425 | 797  | 1029 | 621  | 1017 | 816  | 1.25     | 0.532764 | 614  | 776  | 638  | 914  | 768  | 798  | 756  | 809  | 767     | 807  | 0.84     | 0.046464 | 824  | 0.82     | 0.093447 |
| 261145_at   | At1g19680 | unknown protein                                                                     | expressed protein                                                             | 137  | 164  | 157  | 175  | 189  | 167  | 153  | 180  | 0.85     | 0.095469 | 124  | 133  | 136  | 207  | 141  | 141  | 159  | 156  | 131     | 161  | 0.81     | 0.120862 | 163  | 0.81     | 0.222595 |
| 261146_at   | At1g19620 | hydroethical protein predicted by oener expressed protein                           |                                                                               | 37   | 55   | 51   | 52   | 61   | 53   | 48   | 55   | 0.87     | 0.301801 | 23   | 22   | 26   | 32   | 26   | 28   | 33   | 24   | 30      | 30   | 0.78     | 0.023424 | 29   | 0.83     | 0.099259 |
| 261147_at   | At1g19690 | unknown protein : supported by full-length expressed protein                        |                                                                               | 168  | 215  | 257  | 256  | 272  | 239  | 213  | 256  | 0.83     | 0.192389 | 139  | 130  | 144  | 202  | 161  | 154  | 177  | 166  | 138     | 172  | 0.80     | 0.263849 | 172  | 0.80     | 0.085683 |
| 261148_at   | At1g19580 | unknown protein : supported by full-length bacterial transferase hexapeptide repeat |                                                                               | 244  | 288  | 350  | 439  | 477  | 395  | 294  | 437  | 0.67     | 0.021439 | 290  | 379  | 361  | 560  | 406  | 371  | 353  | 362  | 343     | 410  | 0.84     | 0.258845 | 446  | 0.77     | 0.182483 |
| 261149_s_at | At1g19570 | GSH-dependent dehydroascorbate rec dehydroascorbate reductase, putative (i)         |                                                                               | 2276 | 2721 | 2837 | 4717 | 4953 | 4356 | 2611 | 4675 | 0.56     | 0.001684 | 3527 | 3236 | 3647 | 5211 | 4676 | 4088 | 4872 | 5008 | 3470    | 4767 | 0.73     | 0.003291 | 4652 | 0.75     | 0.028409 |
| 261150_at   | At1g19640 | floral nectary-specific protein, putative: S-adenosyl-L-methionine isomeric acid    |                                                                               | 117  | 88   | 144  | 188  | 197  | 188  | 116  | 191  | 0.61     | 0.010194 | 69   | 75   | 95   | 243  | 174  | 108  | 104  | 104  | 80      | 147  | 0.55     | 0.123145 | 175  | 0.46     | 0.074399 |
| 261151_at   | At1g19650 | sec14 cytosolic factor, putative similar: SEC14 cytosolic factor, putative / phosho |                                                                               | 127  | 186  | 190  | 208  | 253  | 175  | 188  | 212  | 0.79     | 0.221782 | 106  | 107  | 123  | 154  | 112  | 108  | 122  | 117  | 112     | 123  | 0.91     | 0.389041 | 125  | 0.90     | 0.454462 |
| 261123_at   | At1g62860 | unknown protein predicted by oensc pentatricopeptide (PPR) repeat-containi          |                                                                               | 110  | 143  | 180  | 188  | 174  | 168  | 144  | 177  | 0.82     | 0.204766 | 66   | 69   | 89   | 98   | 80   | 81   | 100  | 89   | 74      | 90   | 0.83     | 0.098101 | 86   | 0.87     | 0.279434 |
| 261092_at   | At1g62870 | unknown protein                                                                     | expressed protein                                                             | 137  | 164  | 157  | 175  | 189  | 167  | 153  | 180  | 0.85     | 0.095469 | 124  | 133  | 136  | 207  | 141  | 141  | 159  | 156  | 131     | 161  | 0.81     | 0.120862 | 163  | 0.81     | 0.222595 |
| 261093_at   | At1g62880 | non-LTR reverse transcriptase, putative hydroethical protein                        |                                                                               | 45   | 66   | 63   | 60   | 63   | 52   | 58   | 58   | 0.99     | 0.969846 | 47   | 49   | 55   | 62   | 42   | 51   | 65   | 53   | 50      | 53   | 0.96     | 0.936957 | 48   | 1.04     | 0.647078 |
| 261094_at   | At1g62920 | hydroethical protein predicted by oener expressed protein                           |                                                                               | 42   | 66   | 63   | 56   | 57   | 50   | 54   | 55   | 0.98     | 0.902630 | 54   | 43   | 50   | 74   | 55   | 55   | 52   | 53   | 49      | 58   | 0.85     | 0.192660 | 62   | 0.80     | 0.157019 |
| 261095_at   | At1g62930 | unknown protein                                                                     | pentatricopeptide (PPR) repeat-containi                                       | 76   | 101  | 83   | 108  | 112  | 107  | 87   | 109  | 0.80     | 0.044511 | 82   | 80   | 82   | 143  | 99   | 84   | 135  | 123  | 81      | 117  | 0.70     | 0.053009 | 109  | 0.75     | 0.196645 |
| 261096_at   | At1g62940 | 4-coenzyme coenzyme A liase, outal 4-coenzyme-CoA liase family protein              |                                                                               | 39   | 42   | 27   | 64   | 67   | 59   | 49   | 63   | 0.78     | 0.211119 | 40   | 37   | 45   | 46   | 37   | 39   | 50   | 48   | 40      | 46   | 0.88     | 0.387954 | 40   | 1.00     | 0.996523 |
| 261097_at   | At1g62950 | unknown protein                                                                     | leucine-rich repeat transmembrane domain                                      | 109  | 114  | 109  | 114  | 109  | 114  | 109  | 114  | 0.87     | 0.045738 | 176  | 170  | 177  | 117  | 117  | 117  | 117  | 117  | 117     | 117  | 0.76     | 0.058188 | 112  | 0.80     | 0.177005 |
| 261098_at   | At1g62970 | unknown protein                                                                     | DNAJ heat shock N-terminal domain-con                                         | 190  | 267  | 256  | 279  | 280  | 239  | 238  | 266  | 0.90     | 0.273971 | 152  | 158  | 187  | 234  | 151  | 163  | 252  | 232  | 166     | 206  | 0.80     | 0.202352 | 183  | 0.91     | 0.576398 |
| 261099_at   | At1g62980 | expansion At-EXP6, putative similar to ( expansion, putative (EXP18)                |                                                                               | 32   | 38   | 53   | 54   | 41   | 52   | 79   | 0.79 | 0.149514 | 14       | 28   | 32   | 33   | 28   | 35   | 42   | 35   | 29   | 34      | 0.83 | 0.131019 | 32       | 0.90 | 0.337850 |          |
| 261100_at   | At1g63020 | RNA polymerase IIIA large subunit, putative DNA-directed RNA polymerase alpha su    |                                                                               | 166  | 208  | 226  | 253  | 292  | 221  | 200  | 255  | 0.78     | 0.112330 | 163  | 142  | 164  | 219  | 182  | 170  | 180  | 176  | 156     | 186  | 0.84     | 0.062542 | 191  | 0.82     | 0.106986 |
| 261101_at   | At1g63030 | transcription factor DREB1A, outative / AP2 domain-containing transcrip fac         |                                                                               | 19   | 24   | 27   | 24   | 22   | 25   | 21   | 24   | 0.85     | 0.391201 | 17   | 18   | 26   | 18   | 20   | 14   | 22   | 20   | 20      | 14   | 1.07     | 0.668567 | 17   | 1.16     | 0.446127 |
| 261102_at   | At1g62880 | unknown protein                                                                     | cornichon family protein                                                      | 147  | 223  | 237  | 237  | 267  | 200  | 202  | 235  | 0.86     | 0.394518 | 186  | 222  | 218  | 205  | 236  | 223  | 190  | 193  | 209     | 229  | 0.91     | 0.507861 | 254  | 0.82     | 0.178404 |
| 261103_s_at | At1g62900 | O-methyltransferase 1, outative similar O-methyltransferase, putative               |                                                                               | 45   | 45   | 50   | 45   | 58   | 48   | 46   | 50   | 0.93     | 0.444613 | 44   | 53   | 45   | 43   | 41   | 40   | 47   | 42   | 48      | 42   | 1.12     | 0.096181 | 41   | 1.16     | 0.080921 |
| 261104_at   | At1g62910 | unknown protein                                                                     | pentatricopeptide (PPR) repeat-containi                                       | 28   | 49   | 35   | 50   | 53   | 47   | 37   | 50   | 0.74     | 0.133396 | 26   | 28   | 36   | 34   | 32   | 30   | 30   | 100  | 9959091 | 32   | 0.94     | 0.623323 |      |          |          |
| 261105_at   | At1g63000 | unknown protein : supported by full-length expressed protein                        |                                                                               | 412  | 486  | 425  | 654  | 688  | 544  | 441  | 631  | 0.70     | 0.015266 | 492  | 409  | 523  | 771  | 615  | 536  | 589  | 540  | 504     | 616  | 0.63     | 0.160042 | 641  | 0.79     | 0.122448 |
| 261106_at   | At1g62990 | homeodomain-containing protein HD1, homeodomain transcription factor (KNA'          |                                                                               | 50   | 62   | 74   | 86   | 86   | 86   | 62   | 86   | 0.72     | 0.022324 | 94   | 112  | 122  | 146  | 129  | 119  | 157  | 133  | 110     | 137  | 0.80     | 0.045085 | 131  | 0.83     | 0.131765 |
| 261107_at   | At1g63010 | unknown protein : supported by cDNA: SPX (SPX/Pho81XPR1) domain-con                 |                                                                               | 201  | 283  | 304  | 426  | 544  | 422  | 261  | 464  | 0.56     | 0.016236 | 292  | 283  | 299  | 468  | 394  | 352  | 463  | 270  | 292     | 422  | 0.92     | 0.029557 | 405  | 0.72     | 0.092557 |
| 261108_at   | At1g62960 | 1-aminocyclohexane-1-carboxylate su 1-aminocyclohexane-1-carboxylate swn            |                                                                               | 208  | 260  | 270  | 322  | 359  | 257  | 247  | 313  | 0.79     | 0.138896 | 187  | 188  | 222  | 350  | 265  | 228  | 291  | 257  | 199     | 278  | 0.72     | 0.031367 | 281  | 0.71     | 0.096285 |
| 261109_at   | At1g75450 | unknown protein                                                                     | expressed protein                                                             | 171  | 213  | 166  | 179  | 157  | 184  | 167  | 116  | 0.72     | 0.175550 | 105  | 100  | 124  | 184  | 131  | 169  | 151  | 108  | 174     | 154  | 0.52     | 0.032750 | 183  | 0.59     | 0.086233 |
| 261110_at   | At1g75440 | E2, ubiquitin-conjugating enzyme 16 (E2, ubiquitin-conjugating enzyme 16 (UBC1      |                                                                               | 129  | 159  | 172  | 191  | 147  | 138  | 170  | 152  | 0.78     | 0.124444 | 137  | 162  | 175  | 124  | 165  | 168  | 174  | 162  | 137     | 165  | 0.74     | 0.031884 | 199  | 0.72     | 0.063533 |
| 261111_at   | At1g75430 | homeodomain protein BEL1, putative homeodomain-containing protein                   |                                                                               | 231  | 253  | 297  | 280  | 287  | 197  | 260  | 234  | 1.11     | 0.476840 | 86   | 73   | 89   | 166  | 133  | 118  | 108  | 99   | 82      | 125  | 0.66     | 0.038538 | 139  | 0.59     | 0.019336 |
| 261112_at   | At1g75420 | unknown protein                                                                     | glycosyl transferase family 1 protein                                         | 195  | 265  | 252  | 304  | 292  | 283  | 237  | 293  | 0.81     | 0.067312 | 212  | 228  | 242  | 317  | 230  | 233  | 216  | 240  | 227     | 247  | 0.92     | 0.452545 | 260  | 0.87     | 0.338336 |
| 261113_at   | At1g75400 | hydroethical protein predicted by oener expressed protein                           |                                                                               | 141  | 200  | 191  | 223  | 219  | 173  | 177  | 205  | 0.87     | 0.321801 | 215  | 228  | 230  | 291  | 243  | 210  | 250  | 225  | 224     | 244  | 0.92     | 0.329512 | 248  | 0.90     | 0.374848 |
| 261114_at   | At1g75390 | hZIP transcription factor AT2, outative ZIP transcription factor family protein     |                                                                               | 380  | 454  | 404  |      |      |      |      |      |          |          |      |      |      |      |      |      |      |      |         |      |          |          |      |          |          |

|           |           |                                                                                      |      |      |      |      |      |      |      |      |          |          |      |      |      |      |      |      |      |      |      |      |      |          |          |      |          |          |
|-----------|-----------|--------------------------------------------------------------------------------------|------|------|------|------|------|------|------|------|----------|----------|------|------|------|------|------|------|------|------|------|------|------|----------|----------|------|----------|----------|
| 261040_at | At1g17370 | oliguridylate binding protein, putative oligouridylate-binding protein, putative     | 466  | 573  | 587  | 634  | 736  | 590  | 542  | 653  | 0.83     | 0.126533 | 458  | 498  | 523  | 690  | 572  | 543  | 617  | 567  | 493  | 598  | 0.82 | 0.030872 | 602      | 0.82 | 0.089882 |          |
| 261041_at | At1g17440 | transcription initiation factor IID (TFIID) ;                                        | 228  | 118  | 327  | 364  | 364  | 308  | 291  | 345  | 0.84     | 0.122286 | 227  | 224  | 284  | 337  | 272  | 219  | 278  | 262  | 245  | 275  | 0.89 | 0.346668 | 277      | 0.88 | 0.454041 |          |
| 261042_at | At1g17400 | GTP-binding protein, putative similar to Ras-related GTP-binding protein, putative   | 18   | 24   | 25   | 26   | 26   | 22   | 22   | 26   | 0.84     | 0.124784 | 18   | 22   | 27   | 22   | 22   | 22   | 24   | 26   | 18   | 23   | 22   | 1.01     | 0.899839 | 23   | 1.01     | 0.953305 |
| 261043_at | At1g17250 | hypothetical protein similar to unknown GMPase-related                               | 112  | 112  | 117  | 117  | 115  | 134  | 115  | 134  | 0.85     | 0.122116 | 88   | 82   | 98   | 118  | 110  | 75   | 116  | 110  | 110  | 116  | 1.01 | 0.176631 | 119      | 1.01 | 0.894345 |          |
| 261044_at | At1g17310 | multidomain biosynthesis CNX3 dot multidomain biosynthesis CNX3 protein              | 126  | 179  | 205  | 199  | 205  | 169  | 170  | 191  | 0.89     | 0.455150 | 168  | 199  | 177  | 266  | 202  | 195  | 247  | 229  | 181  | 228  | 0.80 | 0.049435 | 221      | 0.82 | 0.177510 |          |
| 261045_at | At1g1310  | pathogenesis related protein, putative allergen V5/TP1-related family protein        | 36   | 26   | 37   | 29   | 38   | 28   | 33   | 32   | 1.04     | 0.790203 | 20   | 34   | 25   | 27   | 21   | 37   | 22   | 26   | 26   | 26   | 1.02 | 0.930032 | 23       | 1.13 | 0.532450 |          |
| 261046_at | At1g1390  | flavonol 3-O-glucosyltransferase, putative UDP-glucuronosyl(VUDP-glucose) transfe    | 29   | 29   | 39   | 54   | 52   | 54   | 59   | 41   | 0.55     | 0.133224 | 42   | 41   | 39   | 43   | 34   | 32   | 47   | 41   | 39   | 39   | 1.03 | 0.744554 | 36       | 1.12 | 0.304554 |          |
| 261047_at | At1g1390  | hypothetical protein predicted by oener hydrophobic protein                          | 32   | 32   | 49   | 51   | 54   | 45   | 40   | 48   | 0.83     | 0.126040 | 22   | 32   | 35   | 28   | 25   | 29   | 34   | 28   | 29   | 34   | 0.87 | 0.255950 | 28       | 0.86 | 0.175759 |          |
| 261048_at | At1g1420  | flavonol 3-O-glucosyltransferase, putative UDP-glucuronosyl(VUDP-glucose) transfe    | 107  | 105  | 169  | 145  | 122  | 155  | 127  | 141  | 0.90     | 0.583551 | 42   | 46   | 65   | 56   | 48   | 43   | 69   | 66   | 51   | 56   | 0.91 | 0.553094 | 49       | 1.04 | 0.802805 |          |
| 261049_at | At1g1430  | hypothetical protein similar to hvootheti expressed protein                          | 281  | 339  | 295  | 316  | 323  | 280  | 305  | 306  | 1.00     | 0.960123 | 361  | 335  | 325  | 442  | 346  | 317  | 393  | 418  | 340  | 383  | 0.89 | 0.220123 | 368      | 0.92 | 0.510286 |          |
| 261050_at | At1g1260  | cytochrome P450, putative s1 basic helix-loop-helix (bHLH) family prot               | 126  | 148  | 142  | 170  | 183  | 142  | 139  | 165  | 0.84     | 0.132104 | 95   | 98   | 116  | 164  | 139  | 126  | 134  | 132  | 103  | 139  | 0.74 | 0.011381 | 143      | 0.72 | 0.035992 |          |
| 261051_at | At1g1280  | transcription P450, putative similar to c cytochrome P450 family protein             | 8    | 11   | 10   | 9    | 11   | 10   | 10   | 10   | 1.00     | 0.975753 | 9    | 6    | 9    | 6    | 9    | 6    | 13   | 9    | 8    | 7    | 1.09 | 0.757601 | 5        | 1.47 | 0.167897 |          |
| 261052_at | At1g1440  | hypothetical protein similar to hvootheti extra-large G-protein-related              | 72   | 80   | 101  | 100  | 110  | 82   | 88   | 97   | 0.90     | 0.452011 | 48   | 47   | 54   | 72   | 65   | 53   | 66   | 60   | 50   | 64   | 0.78 | 0.024121 | 50       | 0.78 | 0.083558 |          |
| 261053_at | At1g1320  | hypothetical protein predicted by oener tetratricopeptide repeat (TPR)-containing    | 72   | 136  | 91   | 120  | 117  | 86   | 100  | 108  | 0.93     | 0.744080 | 72   | 62   | 70   | 97   | 87   | 64   | 86   | 79   | 68   | 83   | 0.82 | 0.100083 | 83       | 0.82 | 0.218032 |          |
| 261054_at | At1g1330  | hypothetical protein predicted by oener tetratricopeptide repeat (TPR)-containing    | 36   | 57   | 46   | 48   | 55   | 41   | 46   | 48   | 0.97     | 0.831091 | 47   | 53   | 46   | 37   | 36   | 42   | 50   | 48   | 49   | 43   | 1.15 | 0.184863 | 38       | 1.27 | 0.023212 |          |
| 261055_at | At1g1300  | chloroplast nucleoid DNA binding orote aspartyl protease family protein              | 730  | 843  | 787  | 979  | 994  | 853  | 786  | 942  | 0.84     | 0.045420 | 513  | 470  | 530  | 589  | 469  | 402  | 620  | 573  | 504  | 531  | 0.95 | 0.655317 | 487      | 1.04 | 0.776500 |          |
| 261056_at | At1g1360  | hypothetical protein similar to hvootheti expressed protein                          | 209  | 404  | 549  | 388  | 458  | 338  | 387  | 395  | 0.86     | 0.947253 | 391  | 491  | 415  | 539  | 440  | 509  | 436  | 430  | 432  | 471  | 0.92 | 0.339407 | 406      | 0.87 | 0.203578 |          |
| 261057_at | At1g1230  | hypothetical protein predicted by oener ORMDL family protein                         | 288  | 367  | 410  | 383  | 406  | 340  | 355  | 376  | 0.94     | 0.630889 | 393  | 372  | 384  | 498  | 393  | 382  | 420  | 380  | 383  | 418  | 0.95 | 0.325247 | 424      | 0.90 | 0.328816 |          |
| 261058_at | At1g1370  | histone, putative similar to histone H3 centromeric histone H3 HTR12 (HTR12)         | 244  | 282  | 258  | 286  | 327  | 273  | 261  | 295  | 0.88     | 0.158861 | 218  | 239  | 327  | 381  | 335  | 284  | 234  | 251  | 261  | 297  | 0.88 | 0.444432 | 334      | 0.78 | 0.172900 |          |
| 261059_at | At1g1250  | transcription factor TINY, putative siml AP2 domain-containing transcription fac     | 37   | 45   | 48   | 54   | 52   | 38   | 51   | 0.75 | 0.028874 | 23       | 30   | 32   | 43   | 39   | 24   | 39   | 32   | 28   | 33   | 33   | 0.86 | 0.377437 | 32       | 0.90 | 0.631114 |          |
| 261025_at | At1g1225  | Expressed protein , supported by full-le NC domain-containing protein-related        | 89   | 107  | 103  | 109  | 120  | 105  | 100  | 111  | 0.90     | 0.183571 | 133  | 137  | 138  | 196  | 168  | 156  | 151  | 142  | 136  | 163  | 0.83 | 0.072115 | 174      | 0.78 | 0.033011 |          |
| 261026_at | At1g1240  | hypothetical protein predicted by oener expressed protein                            | 169  | 310  | 330  | 218  | 217  | 250  | 270  | 195  | 1.38     | 0.250555 | 240  | 290  | 249  | 240  | 205  | 205  | 325  | 285  | 260  | 252  | 1.03 | 0.826946 | 217      | 1.20 | 0.091407 |          |
| 261027_at | At1g1340  | cyclic nucleotide and calmodulin-reuoli cyclic nucleotide-regulated ion channel (    | 31   | 30   | 30   | 28   | 32   | 29   | 31   | 30   | 1.03     | 0.511333 | 41   | 28   | 38   | 42   | 41   | 38   | 38   | 36   | 36   | 39   | 0.91 | 0.342828 | 40       | 0.88 | 0.335369 |          |
| 261028_at | At1g2620  | hypothetical protein predicted by oener expressed protein                            | 63   | 84   | 78   | 89   | 90   | 77   | 75   | 85   | 0.88     | 0.287272 | 48   | 39   | 47   | 61   | 56   | 48   | 55   | 51   | 45   | 54   | 0.83 | 0.045928 | 55       | 0.82 | 0.105143 |          |
| 260997_at | At1g2610  | zinc-finger protein (ZPT4-4), putative s zinc finger (C2H2 type) family protein      | 65   | 71   | 87   | 95   | 122  | 88   | 75   | 98   | 0.76     | 0.070399 | 81   | 76   | 83   | 99   | 80   | 78   | 89   | 82   | 80   | 86   | 0.96 | 0.325601 | 86       | 0.93 | 0.460313 |          |
| 260996_at | At1g2690  | CAF protein similar to C2H2 zinc finger zinc finger (C2H2 type) family protein       | 18   | 20   | 26   | 23   | 24   | 26   | 21   | 24   | 0.88     | 0.314993 | 21   | 20   | 21   | 26   | 22   | 19   | 24   | 20   | 21   | 22   | 0.94 | 0.446534 | 22       | 0.94 | 0.533226 |          |
| 260999_at | At1g2680  | hypothetical protein similar to putative I expressed protein                         | 711  | 1028 | 1075 | 860  | 1074 | 868  | 938  | 934  | 1.00     | 0.976686 | 746  | 660  | 771  | 922  | 759  | 658  | 877  | 881  | 725  | 820  | 0.89 | 0.223234 | 780      | 0.93 | 0.551709 |          |
| 261000_at | At1g2640  | hypothetical protein predicted by oener agenet domain-containing protein             | 541  | 621  | 606  | 707  | 760  | 594  | 589  | 687  | 0.86     | 0.147896 | 498  | 382  | 546  | 659  | 558  | 458  | 546  | 524  | 475  | 552  | 0.86 | 0.224784 | 562      | 0.85 | 0.314659 |          |
| 261001_at | At1g2630  | hypothetical protein similar to hvootheti expressed protein                          | 54   | 65   | 67   | 71   | 79   | 65   | 62   | 71   | 0.87     | 0.182137 | 63   | 67   | 70   | 97   | 83   | 78   | 70   | 78   | 67   | 81   | 0.82 | 0.056164 | 86       | 0.78 | 0.035118 |          |
| 261002_at | At1g2620  | hypothetical protein contains similarity i cobalamin synthase/P47K family protein    | 58   | 112  | 115  | 136  | 121  | 107  | 136  | 0.77 | 0.050922 | 98       | 107  | 128  | 164  | 137  | 134  | 121  | 105  | 174  | 129  | 105  | 0.85 | 0.232072 | 140      | 0.79 | 0.137058 |          |
| 261003_at | At1g2600  | hypothetical protein predicted by oener pentatricopeptide (PPR) repeat-containi      | 33   | 45   | 49   | 47   | 52   | 47   | 42   | 49   | 0.87     | 0.276752 | 30   | 29   | 37   | 31   | 33   | 31   | 33   | 31   | 32   | 33   | 0.97 | 0.793825 | 34       | 0.95 | 0.708285 |          |
| 261004_at | At1g2640  | hypothetical protein similar to putative beta-1,3-glucanase-related                  | 6    | 10   | 50   | 117  | 105  | 83   | 48   | 102  | 0.47     | 0.014622 | 122  | 153  | 127  | 243  | 208  | 183  | 194  | 177  | 134  | 201  | 0.67 | 0.008076 | 211      | 0.63 | 0.017500 |          |
| 261005_at | At1g2450  | hypothetical protein similar to reticulin FAD-binding domain-containing protein      | 6    | 10   | 11   | 5    | 7    | 6    | 9    | 6    | 1.45     | 0.140252 | 7    | 5    | 8    | 6    | 3    | 8    | 7    | 6    | 7    | 5    | 1.21 | 0.320219 | 5        | 1.34 | 0.264642 |          |
| 261006_at | At1g2410  | unknown protein similar to reticulin or FAD-binding domain-containing protein        | 13   | 16   | 20   | 15   | 19   | 16   | 18   | 0.93 | 0.626538 | 17       | 18   | 21   | 18   | 18   | 14   | 15   | 13   | 29   | 18   | 14   | 1.03 | 0.903336 | 14       | 1.29 | 0.040054 |          |
| 261007_at | At1g2400  | hypothetical protein similar to reticulin FAD-binding domain-containing protein      | 14   | 12   | 19   | 20   | 17   | 14   | 15   | 17   | 0.90     | 0.548619 | 13   | 13   | 15   | 13   | 12   | 14   | 14   | 11   | 13   | 13   | 1.04 | 0.554471 | 13       | 1.05 | 0.462743 |          |
| 261008_at | At1g2370  | hypothetical protein contains similarity i RNA helicase, putative                    | 230  | 298  | 320  | 324  | 336  | 253  | 283  | 304  | 0.93     | 0.595751 | 212  | 178  | 221  | 280  | 211  | 209  | 211  | 198  | 204  | 222  | 0.92 | 0.443965 | 233      | 0.87 | 0.328831 |          |
| 261009_at | At1g2360  | hypothetical protein similar to putative i hydrolase, alpha-beta fold family protein | 19   | 25   | 36   | 29   | 31   | 43   | 27   | 34   | 0.78     | 0.323526 | 12   | 20   | 23   | 23   | 18   | 17   | 24   | 23   | 18   | 21   | 0.87 | 0.398814 | 19       | 0.95 | 0.786224 |          |
| 261010_at | At1g2350  | hypothetical protein predicted by oener hydrophobic protein                          | 16   | 15   | 17   | 18   | 16   | 19   | 18   | 19   | 0.86     | 0.180625 | 14   | 13   | 17   | 12   | 15   | 11   | 13   | 15   | 13   | 13   | 1.13 | 0.600166 | 14       | 1.17 | 0.238544 |          |
| 261011_at | At1g2340  | cytochrome b5 similar to cytochrome b5 cytochrome b5, putative                       | 206  | 250  | 249  | 254  | 276  | 240  | 235  | 257  | 0.92     | 0.284743 | 217  | 259  | 279  | 332  | 267  | 252  | 256  | 242  | 252  | 270  | 0.93 | 0.508103 | 283      | 0.89 | 0.381537 |          |
| 261012_at | At1g2600  | CLEs, putative CLAVATA3/ESR-Relat CLE9, putative                                     | 30   | 29   | 37   | 43   | 48   | 35   | 32   | 42   | 0.76     | 0.087539 | 36   | 37   | 38   | 41   | 40   | 33   | 41   | 35   | 37   | 38   | 0.97 | 0.598466 | 38       | 0.97 | 0.698122 |          |
| 261013_at | At1g2440  | fatty acid elongase 3-ketoacyl-CoA syn expressed protein                             | 139  | 199  | 223  | 181  | 208  | 158  | 187  | 182  | 1.03     | 0.880198 | 208  | 232  | 215  | 303  | 258  | 251  | 251  | 235  | 218  | 260  | 0.84 | 0.041729 | 270      | 0.81 | 0.043028 |          |
| 261014_at | At1g2400  | unknown protein, supported by full-length tetratricopeptide (PPR) repeat-containi    | 373  | 381  | 395  | 518  | 494  | 415  | 370  | 475  | 0.78     | 0.043320 | 289  | 253  | 307  | 418  | 323  | 305  | 302  | 306  | 283  | 331  | 0.86 | 0.054540 | 349      | 0.81 | 0.164730 |          |
| 261015_at | At1g2480  | 14-3-3 protein GF14alpha (trTF2) identical 14-3-3 protein GF14 alpha (GRF12)         | 38   | 35   | 38   | 40   | 34   | 35   | 37   | 0.95 | 0.682313 | 21       | 22   | 25   | 21   | 26   | 28   | 26   | 28   | 26   | 28   | 26   | 1.00 | 0.890073 | 24       | 1.07 | 0.748007 |          |
| 261016_at | At1g2560  | beta-glucosidase, putative similar to be glucosyl hydrolase family 1 protein         | 1295 | 1402 | 1473 | 1933 | 2023 | 1727 | 1390 | 1894 | 0.73     | 0.007333 | 1253 | 1241 | 1328 | 1926 | 1515 | 1389 | 1685 | 1720 | 1274 | 1647 | 0.87 | 0.023798 | 1610     | 0.79 | 0.110552 |          |
| 261017_at | At1g2570  | UDP-glucose dehydrogenase, putative UDP-glucose 6-dehydrogenase, putative            | 489  | 462  | 501  | 705  | 830  | 675  | 484  | 736  | 0.66     | 0.006737 | 377  | 363  | 417  | 715  | 621  | 533  | 566  | 541  | 386  | 595  | 0.65 | 0.040078 | 623      | 0.62 | 0.012598 |          |
| 261018_at | At1g2650  | unknown protein contains similarity to c peothidi-rolvi cis-trans isomerase PPIC     | 865  | 1056 | 1222 | 1418 | 1372 | 1356 | 1048 | 1382 | 0.76     | 0.033123 | 1154 | 1448 | 1609 | 1771 | 1618 | 1339 | 1373 | 1371 | 1404 | 1489 | 0.94 | 0.586237 | 1566     | 0.90 | 0.423990 |          |
| 261019_at | At1g2470  | unknown protein, supported by cDNA, expressed protein                                | 467  | 536  | 485  | 621  | 572  | 468  | 537  | 488  | 0.92     | 0.509117 | 641  | 629  | 587  | 693  | 617  | 583  | 614  | 587  | 614  | 657  | 0.91 | 0.587418 | 667      | 0.90 | 0.187107 |          |
| 261020_at | At1g2390  | hypothetical protein similar to reticulin FAD-binding domain-containing protein      | 11   | 10   | 11   | 17   | 13   | 10   | 14   | 0.77 |          |          |      |      |      |      |      |      |      |      |      |      |      |          |          |      |          |          |

|             |           |                                                          |      |      |      |      |      |      |      |      |          |          |      |      |      |      |      |      |      |      |      |      |          |          |      |          |          |
|-------------|-----------|----------------------------------------------------------|------|------|------|------|------|------|------|------|----------|----------|------|------|------|------|------|------|------|------|------|------|----------|----------|------|----------|----------|
| 260945_at   | At1g05950 | hypothetical protein predicted by gene expressed protein | 261  | 329  | 348  | 318  | 396  | 295  | 313  | 336  | 0.9      | 0.589294 | 282  | 238  | 293  | 367  | 320  | 276  | 329  | 327  | 271  | 324  | 0.84     | 0.061256 | 321  | 0.84     | 0.185610 |
| 260946_at   | At1g06010 | hypothetical protein predicted by gene expressed protein | 201  | 328  | 337  | 315  | 400  | 309  | 279  | 341  | 0.83     | 0.276532 | 338  | 366  | 349  | 476  | 449  | 401  | 356  | 335  | 351  | 403  | 0.87     | 0.190909 | 442  | 0.79     | 0.018187 |
| 260947_at   | At1g06020 | fructokinase, putative similar to fructo                 | 51   | 57   | 65   | 41   | 40   | 38   | 58   | 40   | 1.46     | 0.010463 | 61   | 85   | 78   | 32   | 28   | 27   | 26   | 29   | 75   | 29   | 2.62     | 0.000134 | 29   | 2.55     | 0.003286 |
| 260948_at   | At1g06030 | delta 9 desaturase, putative similar to                  | 146  | 146  | 146  | 146  | 146  | 146  | 146  | 146  | 1.46     | 0.000134 | 146  | 146  | 146  | 146  | 146  | 146  | 146  | 146  | 146  | 146  | 1.46     | 0.000134 | 146  | 1.46     | 0.000134 |
| 260949_at   | At1g06100 | F-box protein family contains similar                    | 337  | 507  | 544  | 490  | 545  | 425  | 463  | 487  | 0.95     | 0.753572 | 470  | 518  | 504  | 641  | 573  | 529  | 591  | 579  | 497  | 583  | 0.85     | 0.017071 | 581  | 0.86     | 0.078290 |
| 260950_s_at | At1g06120 | delta 9 desaturase, putative similar to                  | 24   | 26   | 33   | 28   | 24   | 28   | 28   | 26   | 1.05     | 0.667649 | 18   | 21   | 26   | 26   | 23   | 25   | 23   | 18   | 22   | 23   | 0.92     | 0.500114 | 25   | 0.86     | 0.214928 |
| 260951_at   | At1g06150 | hypothetical protein similar to hypoth                   | 147  | 148  | 215  | 176  | 196  | 165  | 170  | 179  | 0.95     | 0.728891 | 132  | 103  | 152  | 154  | 138  | 129  | 175  | 142  | 129  | 147  | 0.88     | 0.283135 | 140  | 0.92     | 0.525974 |
| 260952_at   | At1g06140 | hypothetical protein predicted by gene                   | 42   | 50   | 57   | 57   | 57   | 54   | 44   | 57   | 0.78     | 0.110111 | 37   | 34   | 48   | 32   | 37   | 37   | 34   | 37   | 37   | 37   | 1.04     | 0.604163 | 37   | 1.03     | 0.022688 |
| 260953_at   | At1g06070 | transcriptional activator RF24, putative                 | 341  | 372  | 364  | 430  | 467  | 355  | 359  | 417  | 0.86     | 0.163421 | 356  | 322  | 366  | 475  | 438  | 361  | 431  | 411  | 348  | 423  | 0.82     | 0.031295 | 425  | 0.82     | 0.102012 |
| 260954_at   | At1g06130 | oxaloxalase II isozyme, putative simil                   | 361  | 233  | 245  | 248  | 274  | 209  | 213  | 243  | 0.87     | 0.400818 | 211  | 241  | 230  | 322  | 271  | 244  | 233  | 228  | 227  | 260  | 0.87     | 0.220864 | 279  | 0.81     | 0.099526 |
| 260955_at   | At1g06000 | unknown protein contains similarity to                   | 126  | 43   | 27   | 53   | 54   | 43   | 34   | 50   | 0.68     | 0.055680 | 13   | 18   | 19   | 40   | 24   | 20   | 24   | 22   | 17   | 26   | 0.64     | 0.108841 | 28   | 0.60     | 0.159898 |
| 260956_at   | At1g06040 | salt-tolerance protein identical to salt                 | 328  | 1776 | 1819 | 1946 | 1976 | 1498 | 1630 | 1806 | 0.90     | 0.001460 | 1294 | 1219 | 1351 | 2145 | 1669 | 1326 | 1638 | 1683 | 1777 | 0.77 | 0.082550 | 1680     | 0.77 | 0.185886 |          |
| 260957_at   | At1g06080 | delta 9 desaturase identical to delta 9                  | 728  | 900  | 724  | 1136 | 900  | 724  | 1136 | 900  | 0.72     | 0.015216 | 540  | 495  | 645  | 859  | 757  | 576  | 559  | 660  | 777  | 0.72 | 0.193806 | 917      | 0.61 | 0.050748 |          |
| 260958_at   | At1g06060 | unknown protein identical to unknown                     | 120  | 182  | 186  | 200  | 213  | 170  | 163  | 194  | 0.84     | 0.275377 | 162  | 192  | 185  | 257  | 209  | 200  | 186  | 177  | 180  | 206  | 0.87     | 0.228213 | 222  | 0.81     | 0.098071 |
| 260959_at   | At1g06050 | unknown protein, supported by full-len                   | 107  | 116  | 116  | 110  | 114  | 92   | 103  | 106  | 0.98     | 0.830045 | 101  | 109  | 98   | 142  | 116  | 106  | 97   | 103  | 113  | 113  | 0.91     | 0.354994 | 121  | 0.84     | 0.168620 |
| 260960_at   | At1g05990 | calcium-binding protein, putative simil                  | 9    | 3    | 6    | 6    | 12   | 15   | 6    | 11   | 0.54     | 0.169355 | 4    | 5    | 7    | 6    | 9    | 6    | 4    | 5    | 6    | 0.90 | 0.175880 | 6        | 0.86 | 0.685631 |          |
| 260961_at   | At1g05960 | unknown protein similar to hypothetical                  | 112  | 152  | 145  | 161  | 122  | 139  | 143  | 0.97 | 0.840216 | 37       | 30   | 78   | 96   | 107  | 92   | 74   | 105  | 94   | 88   | 94   | 0.93     | 0.489398 | 91   | 0.97     | 0.799805 |
| 260962_at   | At1g05940 | hypothetical protein predicted by gene                   | 235  | 329  | 390  | 357  | 439  | 318  | 318  | 371  | 0.86     | 0.403576 | 321  | 307  | 330  | 434  | 376  | 320  | 373  | 353  | 319  | 371  | 0.86     | 0.048920 | 377  | 0.85     | 0.159510 |
| 260963_at   | At1g02720 | hypothetical protein similar to putative                 | 127  | 174  | 185  | 217  | 243  | 207  | 162  | 222  | 0.73     | 0.043758 | 156  | 132  | 167  | 227  | 181  | 169  | 194  | 173  | 152  | 190  | 0.80     | 0.052871 | 194  | 0.78     | 0.106171 |
| 260964_at   | At1g02680 | transcription factor TF1D, putative sim                  | 182  | 243  | 295  | 277  | 291  | 256  | 240  | 274  | 0.88     | 0.374215 | 191  | 245  | 233  | 327  | 231  | 251  | 234  | 252  | 223  | 259  | 0.86     | 0.214856 | 270  | 0.83     | 0.233717 |
| 260965_at   | At1g02520 | GTP-binding protein Sar1, putative sir                   | 48   | 63   | 73   | 76   | 81   | 62   | 58   | 73   | 0.79     | 0.121510 | 44   | 44   | 53   | 39   | 41   | 49   | 42   | 47   | 45   | 1.04 | 0.654557 | 45       | 1.06 | 0.668590 |          |
| 260966_at   | At1g02550 | hypothetical protein predicted by gene                   | 26   | 33   | 36   | 38   | 38   | 43   | 32   | 40   | 0.81     | 0.078279 | 24   | 29   | 32   | 34   | 27   | 27   | 32   | 31   | 28   | 30   | 0.94     | 0.454523 | 29   | 0.97     | 0.772465 |
| 260967_s_at | At1g02530 | hypothetical protein contains similar                    | 180  | 200  | 232  | 263  | 246  | 197  | 204  | 235  | 0.87     | 0.281199 | 266  | 241  | 322  | 271  | 239  | 195  | 257  | 257  | 276  | 244  | 1.13     | 0.230959 | 235  | 1.17     | 0.272814 |
| 260968_at   | At1g02470 | hypothetical protein contains non-cons                   | 75   | 102  | 106  | 112  | 118  | 116  | 94   | 115  | 0.82     | 0.099689 | 90   | 106  | 114  | 151  | 118  | 114  | 146  | 132  | 104  | 132  | 0.78     | 0.042316 | 128  | 0.81     | 0.154445 |
| 260969_at   | At1g02460 | polysaccharutase PG1, putative simil                     | 56   | 65   | 88   | 91   | 104  | 88   | 70   | 94   | 0.74     | 0.082491 | 54   | 52   | 69   | 60   | 50   | 51   | 58   | 56   | 62   | 55   | 1.12     | 0.155221 | 54   | 1.15     | 0.202925 |
| 260970_at   | At1g02450 | unknown protein                                          | 27   | 34   | 39   | 52   | 54   | 46   | 33   | 51   | 0.66     | 0.013591 | 24   | 21   | 24   | 44   | 35   | 32   | 32   | 33   | 23   | 35   | 0.65     | 0.010257 | 37   | 0.62     | 0.022072 |
| 260971_at   | At1g02710 | hypothetical protein predicted by gene                   | 57   | 67   | 82   | 77   | 82   | 78   | 69   | 79   | 0.87     | 0.243270 | 53   | 52   | 60   | 57   | 49   | 57   | 81   | 78   | 55   | 64   | 0.85     | 0.316239 | 54   | 1.01     | 0.876989 |
| 260972_at   | At1g02540 | hypothetical protein predicted by gene                   | 13   | 12   | 13   | 17   | 14   | 17   | 13   | 16   | 0.79     | 0.017779 | 10   | 13   | 15   | 11   | 13   | 15   | 19   | 15   | 13   | 15   | 0.87     | 0.401448 | 13   | 0.97     | 0.851627 |
| 260973_at   | At1g02570 | hypothetical protein predicted by gene                   | 25   | 31   | 35   | 35   | 37   | 35   | 30   | 36   | 0.85     | 0.145774 | 21   | 23   | 28   | 26   | 23   | 23   | 31   | 28   | 24   | 26   | 0.91     | 0.392339 | 24   | 0.99     | 0.940885 |
| 260974_at   | At1g02580 | maternal embryo-lewis x control gene                     | 90   | 117  | 119  | 69   | 83   | 108  | 71   | 158  | 0.02     | 0.258580 | 103  | 78   | 98   | 54   | 63   | 62   | 58   | 62   | 58   | 55   | 0.87     | 0.001027 | 54   | 0.97     | 0.068546 |
| 260975_at   | At1g02670 | hypothetical protein predicted by gene                   | 47   | 55   | 54   | 59   | 56   | 57   | 52   | 58   | 0.90     | 0.101745 | 36   | 39   | 48   | 49   | 44   | 35   | 41   | 42   | 41   | 42   | 0.97     | 0.789796 | 43   | 0.96     | 0.786789 |
| 260976_at   | At1g02690 | importin alpha, putative similar to im                   | 525  | 639  | 599  | 689  | 810  | 587  | 588  | 695  | 0.85     | 0.212811 | 442  | 358  | 459  | 545  | 543  | 442  | 464  | 426  | 420  | 484  | 0.87     | 0.166203 | 510  | 0.82     | 0.121904 |
| 260977_at   | At1g02490 | hypothetical protein predicted by gene                   | 17   | 20   | 19   | 20   | 19   | 20   | 19   | 20   | 0.94     | 0.262940 | 15   | 15   | 19   | 22   | 20   | 17   | 20   | 19   | 16   | 20   | 0.84     | 0.063749 | 20   | 0.84     | 0.175193 |
| 260978_at   | At1g02510 | ATP-dependent Clp protease proteol                       | 413  | 832  | 864  | 982  | 1023 | 837  | 770  | 947  | 0.81     | 0.141602 | 727  | 771  | 790  | 1007 | 875  | 855  | 877  | 941  | 861  | 912  | 0.84     | 0.059620 | 942  | 0.81     | 0.066652 |
| 260979_at   | At1g02500 | S-adenosylmethionine synthetase ident                    | 1247 | 1407 | 1328 | 1756 | 1893 | 1476 | 1327 | 1708 | 0.78     | 0.043686 | 1325 | 1266 | 1417 | 2075 | 1762 | 1487 | 1700 | 1666 | 1336 | 1738 | 0.77     | 0.022566 | 1775 | 0.75     | 0.066821 |
| 260980_at   | At1g02540 | beta-xyloridase, putative similar to be                  | 428  | 814  | 526  | 531  | 704  | 483  | 613  | 573  | 1.07     | 0.758318 | 280  | 366  | 261  | 479  | 456  | 383  | 545  | 618  | 303  | 496  | 0.61     | 0.016090 | 439  | 0.69     | 0.035041 |
| 260981_at   | At1g02660 | hypothetical protein similar to hypoth                   | 186  | 201  | 324  | 325  | 377  | 236  | 237  | 313  | 0.76     | 0.274544 | 120  | 120  | 91   | 135  | 111  | 96   | 154  | 138  | 110  | 127  | 0.87     | 0.331112 | 114  | 0.97     | 0.823124 |
| 260982_at   | At1g02470 | predicted protein, supported by cDNA                     | 154  | 223  | 214  | 248  | 265  | 210  | 197  | 252  | 0.78     | 0.171574 | 283  | 306  | 327  | 451  | 349  | 335  | 328  | 305  | 354  | 369  | 0.83     | 0.209941 | 378  | 0.91     | 0.132855 |
| 260983_at   | At1g02700 | unknown protein similar to hypothetical                  | 22   | 22   | 22   | 68   | 28   | 26   | 22   | 41   | 0.54     | 0.239428 | 16   | 19   | 19   | 25   | 21   | 16   | 22   | 22   | 18   | 21   | 0.87     | 0.245237 | 20   | 0.90     | 0.497430 |
| 260984_at   | At1g21510 | hypothetical protein predicted by gene                   | 43   | 32   | 62   | 50   | 50   | 61   | 45   | 54   | 0.85     | 0.426430 | 37   | 42   | 50   | 44   | 36   | 44   | 42   | 43   | 41   | 1.04 | 0.617888 | 41       | 1.04 | 0.730758 |          |
| 260985_at   | At1g21520 | hypothetical protein predicted by gene                   | 25   | 30   | 41   | 27   | 35   | 28   | 32   | 30   | 1.08     | 0.662147 | 64   | 89   | 57   | 43   | 43   | 44   | 65   | 64   | 70   | 51   | 1.36     | 0.112965 | 42   | 1.64     | 0.047996 |
| 260986_at   | At1g21530 | amo-binding protein, putative similar                    | 22   | 28   | 22   | 27   | 27   | 22   | 27   | 26   | 1.05     | 0.720013 | 18   | 20   | 14   | 16   | 18   | 26   | 23   | 20   | 14   | 16   | 1.04     | 0.814776 | 16   | 1.24     | 0.154243 |
| 260987_at   | At1g21540 | amo-binding protein, putative simil                      | 16   | 28   | 28   | 24   | 35   | 29   | 25   | 25   | 1.10     | 0.723566 | 18   | 15   | 18   | 15   | 18   | 15   | 15   | 15   | 15   | 15   | 1.21     | 0.230546 | 15   | 1.26     | 0.287923 |
| 260988_at   | At1g21560 | hypothetical protein predicted by gene                   | 314  | 422  | 379  | 563  | 625  | 438  | 372  | 542  | 0.69     | 0.054987 | 433  | 403  | 448  | 668  | 577  | 523  | 480  | 464  | 428  | 542  | 0.79     | 0.063270 | 589  | 0.73     | 0.021798 |
| 260989_at   | At1g21570 | glycine-rich RNA-binding protein imp                     | 308  | 417  | 440  | 402  | 502  | 372  | 388  | 425  | 0.91     | 0.551308 | 319  | 270  | 325  | 371  | 342  | 289  | 478  | 443  | 305  | 384  | 0.79     | 0.142037 | 334  | 0.91     | 0.378922 |
| 260990_at   | At1g21590 | hypothetical protein similar to Pto kin                  | 83   | 154  | 165  | 253  | 253  | 220  | 134  | 242  | 0.55     | 0.017965 | 84   | 71   | 112  | 160  | 132  | 124  | 109  | 133  | 128  | 109  | 0.68     | 0.023806 | 139  | 0.64     | 0.037496 |
| 260991_at   | At1g21340 | DNA-binding protein, putative contain                    | 43   | 33   | 43   | 44   | 52   | 42   | 38   | 46   | 0.51     | 0.09876  | 34   | 32   | 31   | 35   | 34   | 28   | 34   | 28   | 34   | 32   | 1.04     | 0.419366 | 33   | 1.03     | 0.542940 |
| 260992_at   | At1g21360 | unknown protein                                          | 15   | 15   | 20   | 15   | 26   | 14   | 17   | 18   | 0.90     | 0.654488 | 11   | 10   | 15   | 11   | 13   | 12   | 17   | 12   | 12   | 13   | 0.90     | 0.449177 | 12   | 0.96     | 0.791112 |
| 260993_at   | At1g21370 | hypothetical protein predicted by gene                   | 115  | 137  | 155  | 154  | 163  | 143  | 136  | 153  | 0.89     | 0.252647 | 114  | 128  | 135  | 186  | 142  | 123  | 167  | 157  | 126  | 155  | 0.81     | 0.097866 | 150  | 0.84     | 0.276327 |
| 260994_s_at | At1g      |                                                          |      |      |      |      |      |      |      |      |          |          |      |      |      |      |      |      |      |      |      |      |          |          |      |          |          |

|             |           |                                                                                     |      |      |      |      |      |      |      |      |          |          |      |      |      |      |      |      |      |      |      |      |          |          |          |          |          |          |
|-------------|-----------|-------------------------------------------------------------------------------------|------|------|------|------|------|------|------|------|----------|----------|------|------|------|------|------|------|------|------|------|------|----------|----------|----------|----------|----------|----------|
| 260858_at   | At1g43770 | hypothetical protein predicted by gene: PHD finger family protein                   | 97   | 125  | 135  | 140  | 153  | 123  | 119  | 139  | 0.86     | 0.244771 | 106  | 98   | 107  | 134  | 109  | 116  | 112  | 105  | 104  | 115  | 0.90     | 0.147886 | 120      | 0.87     | 0.110295 |          |
| 260859_at   | At1g43780 | serine carboxypeptidase II, putative sir serine carboxypeptidase S10 family prot    | 21   | 24   | 34   | 33   | 39   | 32   | 26   | 35   | 0.75     | 0.130683 | 18   | 22   | 25   | 15   | 18   | 18   | 19   | 22   | 18   | 19   | 1.21     | 0.101029 | 17       | 1.27     | 0.132942 |          |
| 260860_at   | At1g43810 | hypothetical protein predicted by gene: hypothetical protein                        | 42   | 53   | 55   | 49   | 64   | 60   | 50   | 57   | 0.87     | 0.239756 | 42   | 52   | 70   | 44   | 37   | 46   | 53   | 53   | 55   | 47   | 1.17     | 0.311283 | 42       | 1.30     | 0.222349 |          |
| 260861_at   | At1g43840 | hypothetical protein predicted by gene: CACTA-like transposon family (Pta)En        | 12   | 13   | 11   | 16   | 16   | 12   | 11   | 11   | 0.82     | 0.167056 | 12   | 11   | 14   | 12   | 12   | 9    | 8    | 12   | 12   | 10   | 1.02     | 0.352418 | 12       | 1.03     | 0.433087 |          |
| 260862_at   | At1g43850 | unknown protein                                                                     | 337  | 401  | 417  | 452  | 467  | 395  | 385  | 438  | 0.88     | 0.180078 | 277  | 243  | 297  | 401  | 325  | 258  | 350  | 323  | 272  | 331  | 0.82     | 0.123871 | 328      | 0.83     | 0.278991 |          |
| 260863_at   | At1g43870 | hypothetical protein predicted by gene: pseudogene, hypothetical protein // pse     | 17   | 20   | 27   | 19   | 23   | 31   | 21   | 24   | 0.89     | 0.573789 | 16   | 13   | 19   | 23   | 15   | 13   | 20   | 19   | 16   | 18   | 0.88     | 0.459215 | 17       | 0.93     | 0.782195 |          |
| 260864_at   | At1g43880 | hypothetical protein predicted by gene: hypothetical protein // pseudogene, hyp     | 5    | 3    | 6    | 7    | 6    | 8    | 5    | 7    | 0.87     | 0.064398 | 4    | 4    | 6    | 4    | 9    | 4    | 5    | 3    | 5    | 5    | 0.97     | 0.918777 | 5        | 0.86     | 0.700264 |          |
| 260865_at   | At1g43890 | reverse transcriptase, putative similar 1 hypothetical protein                      | 48   | 54   | 71   | 52   | 52   | 58   | 54   | 60   | 0.85     | 0.833699 | 39   | 47   | 69   | 40   | 46   | 40   | 37   | 46   | 37   | 46   | 1.13     | 0.572347 | 47       | 1.25     | 0.366910 |          |
| 260866_at   | At1g43886 | poliovirus, putative similar to poliovirus copia-like retrotransposon family        | 17   | 17   | 19   | 17   | 19   | 27   | 18   | 21   | 0.84     | 0.363190 | 17   | 22   | 20   | 16   | 13   | 15   | 17   | 17   | 20   | 15   | 1.29     | 0.030760 | 14       | 1.39     | 0.037157 |          |
| 260867_at   | At1g43790 | hypothetical protein predicted by gene: expressed protein                           | 25   | 38   | 42   | 70   | 66   | 69   | 35   | 68   | 0.51     | 0.003294 | 49   | 76   | 58   | 143  | 67   | 98   | 63   | 54   | 61   | 85   | 0.72     | 0.320696 | 103      | 0.59     | 0.153976 |          |
| 260868_at   | At1g43860 | unknown protein - supported by full-lenc expressed protein                          | 207  | 233  | 224  | 252  | 265  | 210  | 221  | 242  | 0.91     | 0.312871 | 216  | 256  | 250  | 335  | 273  | 242  | 268  | 244  | 240  | 273  | 0.88     | 0.234185 | 284      | 0.85     | 0.226671 |          |
| 260869_at   | At1g43800 | alsarovi acv1 carrier protein (desaturase acv1-acv1-carrier-carrier) (desaturase, o | 7    | 7    | 9    | 10   | 12   | 13   | 9    | 11   | 0.77     | 0.00056  | 12   | 17   | 16   | 17   | 16   | 16   | 13   | 12   | 15   | 15   | 1.02     | 0.861490 | 17       | 0.92     | 0.430087 |          |
| 260870_at   | At1g43890 | GTP-binding protein(RAB1Y), putative Ras-related GTP-binding protein, putativ       | 449  | 526  | 541  | 532  | 484  | 441  | 519  | 0.85 | 0.144693 | 298      | 352  | 378  | 525  | 363  | 331  | 441  | 419  | 343  | 416  | 0.82 | 0.181155 | 407      | 0.84     | 0.381276 |          |          |
| 260836_at   | At1g43660 | hypothetical protein predicted by gene: hypothetical protein                        | 10   | 7    | 7    | 4    | 8    | 8    | 6    | 1.33 | 0.286005 | 5        | 7    | 10   | 6    | 10   | 10   | 4    | 7    | 9    | 9    | 0.99 | 0.954138 | 7        | 0.96     | 0.890209 |          |          |
| 260837_at   | At1g43670 | fructose 1,6-bisphosphatase, putative / fructose-1,6-bisphosphatase, putative / l   | 282  | 422  | 406  | 354  | 369  | 288  | 370  | 337  | 1.10     | 0.553387 | 347  | 356  | 356  | 443  | 379  | 349  | 385  | 376  | 353  | 386  | 0.91     | 0.161036 | 390      | 0.90     | 0.253817 |          |
| 260838_at   | At1g43680 | hypothetical protein predicted by gene: hypothetical protein                        | 27   | 28   | 44   | 35   | 41   | 27   | 33   | 35   | 0.96     | 0.836238 | 22   | 19   | 24   | 23   | 22   | 26   | 27   | 23   | 22   | 24   | 0.89     | 0.194228 | 23       | 0.92     | 0.398610 |          |
| 260839_at   | At1g43690 | hypothetical protein predicted by gene: hypothetical protein                        | 304  | 390  | 423  | 462  | 482  | 402  | 356  | 452  | 0.79     | 0.060454 | 299  | 277  | 312  | 435  | 317  | 363  | 378  | 296  | 377  | 0.78 | 0.020588 | 375      | 0.79     | 0.090586 |          |          |
| 260840_at   | At1g43715 | poliovirus, putative similar to poliovirus copia-like retrotransposon family        | 56   | 59   | 81   | 78   | 73   | 86   | 65   | 79   | 0.83     | 0.202347 | 39   | 47   | 58   | 48   | 42   | 45   | 50   | 46   | 48   | 46   | 1.04     | 0.725109 | 45       | 1.07     | 0.644887 |          |
| 260809_at   | At1g43730 | hypothetical protein predicted by gene: hypothetical protein                        | 32   | 37   | 41   | 40   | 45   | 40   | 37   | 42   | 0.88     | 0.191939 | 24   | 24   | 35   | 32   | 27   | 30   | 28   | 33   | 28   | 30   | 0.92     | 0.473644 | 30       | 0.94     | 0.662382 |          |
| 260810_s_at | At1g43745 | retroelement protein, putative similar to cyovs-like retrotransposon family (Atheta | 8    | 12   | 15   | 9    | 15   | 16   | 12   | 13   | 0.89     | 0.680131 | 12   | 11   | 7    | 10   | 9    | 7    | 9    | 11   | 10   | 9    | 1.08     | 0.638585 | 9        | 1.15     | 0.523876 |          |
| 260811_s_at | At1g43740 | hypothetical protein predicted by gene: cyovs-like retrotransposon family (Atheta   | 10   | 13   | 9    | 10   | 15   | 10   | 11   | 12   | 0.92     | 0.698264 | 9    | 9    | 14   | 9    | 6    | 11   | 11   | 11   | 10   | 11   | 1.11     | 0.574206 | 9        | 1.22     | 0.414025 |          |
| 260812_at   | At1g43650 | nodulin-like protein similar to VIN21 G integral membrane family protein / nodul    | 87   | 111  | 130  | 113  | 127  | 134  | 109  | 125  | 0.87     | 0.327617 | 90   | 81   | 98   | 152  | 117  | 112  | 119  | 103  | 90   | 120  | 0.74     | 0.038463 | 127      | 0.71     | 0.051645 |          |
| 260813_at   | At1g43700 | VirE2-interacting protein (VP1) Dicer2-interacting protein (VP1)                    | 396  | 599  | 705  | 529  | 608  | 425  | 567  | 521  | 1.09     | 0.685776 | 549  | 656  | 515  | 831  | 636  | 630  | 747  | 721  | 573  | 713  | 0.80     | 0.055291 | 699      | 0.82     | 0.185563 |          |
| 260814_at   | At1g43710 | histidine decarboxylase, putative simili serine decarboxylase                       | 537  | 569  | 542  | 809  | 752  | 687  | 550  | 749  | 0.73     | 0.005522 | 456  | 407  | 581  | 891  | 715  | 578  | 632  | 577  | 481  | 678  | 0.71     | 0.064389 | 728      | 0.66     | 0.077802 |          |
| 260815_at   | At1g08950 | chloroplast inner envelope protein, put chloroplast inner envelope protein-relate   | 297  | 402  | 397  | 395  | 431  | 342  | 355  | 389  | 0.91     | 0.444658 | 333  | 284  | 314  | 422  | 350  | 296  | 393  | 388  | 310  | 370  | 0.84     | 0.101406 | 356      | 0.87     | 0.303303 |          |
| 260816_at   | At1g06930 | hypothetical protein predicted by gene: expressed protein                           | 35   | 38   | 38   | 40   | 45   | 43   | 37   | 42   | 0.88     | 0.037901 | 33   | 32   | 38   | 36   | 34   | 33   | 32   | 34   | 33   | 33   | 1.03     | 0.633879 | 34       | 1.02     | 0.829281 |          |
| 260817_at   | At1g06900 | unknown protein                                                                     | 287  | 277  | 252  | 318  | 212  | 262  | 261  | 100  | 0.975152 | 201      | 175  | 185  | 185  | 198  | 163  | 197  | 179  | 187  | 184  | 1.01 | 0.820139 | 182      | 1.03     | 0.722018 |          |          |
| 260818_at   | At1g08890 | unknown protein                                                                     | 290  | 363  | 380  | 395  | 490  | 373  | 344  | 419  | 0.82     | 0.172448 | 247  | 246  | 259  | 298  | 276  | 255  | 280  | 280  | 251  | 278  | 0.90     | 0.031870 | 276      | 0.91     | 0.123749 |          |
| 260819_at   | At1g08850 | b-Zn Dna binding protein, putative simi bZIP transcription factor, putative         | 55   | 57   | 63   | 63   | 73   | 55   | 59   | 64   | 0.92     | 0.394382 | 51   | 55   | 65   | 61   | 56   | 49   | 50   | 61   | 57   | 57   | 1.00     | 0.979547 | 55       | 1.04     | 0.723817 |          |
| 260820_at   | At1g08820 | hypothetical protein, putative similar to nuclear transmembrane protein             | 124  | 147  | 143  | 110  | 102  | 110  | 109  | 104  | 0.844117 | 101      | 88   | 107  | 108  | 109  | 104  | 120  | 105  | 107  | 105  | 108  | 0.91     | 0.251389 | 107      | 0.92     | 0.466627 |          |
| 260821_at   | At1g08820 | unknown protein contains Pfam profile: carotenoid isomerase, putative               | 163  | 212  | 227  | 263  | 260  | 231  | 201  | 245  | 0.82     | 0.102813 | 179  | 166  | 183  | 205  | 182  | 178  | 201  | 186  | 176  | 190  | 0.92     | 0.127637 | 188      | 0.93     | 0.282387 |          |
| 260822_at   | At1g06790 | RNA polymerase, putative similar to: C RNA polymerase Rpb7 N-terminal doma          | 102  | 171  | 233  | 263  | 270  | 233  | 210  | 255  | 0.82     | 0.078444 | 227  | 238  | 236  | 321  | 260  | 263  | 240  | 235  | 233  | 264  | 0.88     | 0.188376 | 281      | 0.83     | 0.075757 |          |
| 260823_at   | At1g06770 | hypothetical protein predicted by gene: zinc finger (C3HC4-type RING finger) fa     | 93   | 139  | 151  | 155  | 168  | 127  | 128  | 150  | 0.85     | 0.347303 | 94   | 90   | 106  | 147  | 115  | 137  | 121  | 120  | 127  | 97   | 1.28     | 0.76     | 0.014236 | 127      | 0.76     | 0.057735 |
| 260824_at   | At1g06720 | unknown protein                                                                     | 101  | 116  | 132  | 135  | 145  | 116  | 115  | 132  | 0.89     | 0.209154 | 68   | 64   | 78   | 94   | 84   | 74   | 74   | 68   | 64   | 78   | 0.89     | 0.292544 | 90       | 0.86     | 0.136852 |          |
| 260825_at   | At1g06810 | hypothetical protein predicted by gene: hypothetical protein                        | 58   | 62   | 85   | 72   | 82   | 73   | 68   | 76   | 0.90     | 0.456257 | 38   | 34   | 45   | 41   | 40   | 70   | 49   | 45   | 39   | 49   | 0.79     | 0.230551 | 51       | 0.77     | 0.323668 |          |
| 260826_at   | At1g06710 | hypothetical protein predicted by gene: centarioticoide (PPR) repeat-containi       | 41   | 50   | 48   | 59   | 68   | 58   | 47   | 62   | 0.75     | 0.024897 | 31   | 34   | 38   | 39   | 36   | 38   | 38   | 39   | 34   | 38   | 0.89     | 0.073443 | 38       | 0.91     | 0.203849 |          |
| 260827_at   | At1g06740 | modr-A-like protein similar to Mu transp. signal-like transposase family            | 110  | 134  | 148  | 155  | 163  | 121  | 131  | 146  | 0.89     | 0.406784 | 102  | 83   | 102  | 125  | 116  | 96   | 115  | 111  | 96   | 112  | 0.85     | 0.077016 | 112      | 0.85     | 0.197784 |          |
| 260828_at   | At1g06750 | hypothetical protein                                                                | 22   | 32   | 37   | 28   | 46   | 33   | 30   | 32   | 0.84     | 0.457081 | 24   | 21   | 27   | 22   | 18   | 21   | 23   | 21   | 23   | 21   | 1.13     | 0.31573  | 21       | 0.97     | 0.171241 |          |
| 260829_s_at | At1g06870 | chloroplast thylakoid processing prot. signal peptidase, putative                   | 308  | 348  | 439  | 491  | 482  | 361  | 365  | 444  | 0.82     | 0.234736 | 291  | 368  | 325  | 544  | 404  | 365  | 453  | 384  | 328  | 430  | 0.76     | 0.066004 | 438      | 0.75     | 0.133939 |          |
| 260830_at   | At1g06760 | histone H1, putative similar to histone / histone H1, putative                      | 1732 | 2039 | 2000 | 2209 | 2477 | 2117 | 1924 | 2268 | 0.85     | 0.076450 | 1804 | 2088 | 1937 | 2563 | 2135 | 1965 | 2077 | 2065 | 1943 | 2161 | 0.90     | 0.200559 | 2221     | 0.88     | 0.229581 |          |
| 260831_at   | At1g06830 | glutaredione, putative similar to glutaredione family protein                       | 26   | 34   | 32   | 36   | 43   | 37   | 31   | 39   | 0.80     | 0.067755 | 27   | 25   | 24   | 29   | 30   | 29   | 35   | 32   | 25   | 31   | 0.82     | 0.014060 | 29       | 0.87     | 0.007833 |          |
| 260832_at   | At1g06780 | unknown protein - supported by cDNA: glycyl transferase family 8 protein            | 223  | 247  | 237  | 240  | 269  | 225  | 234  | 244  | 0.96     | 0.507775 | 163  | 160  | 202  | 256  | 211  | 165  | 275  | 253  | 192  | 233  | 0.83     | 0.179575 | 211      | 0.91     | 0.514020 |          |
| 260833_at   | At1g06800 | lipase, putative similar to lipase GB-A4 lipase class 3 family protein              | 61   | 61   | 61   | 61   | 56   | 64   | 61   | 61   | 0.86     | 0.713173 | 54   | 46   | 52   | 53   | 52   | 53   | 52   | 48   | 53   | 52   | 0.93     | 0.217441 | 49       | 0.93     | 0.130664 |          |
| 260834_at   | At1g06780 | sugar kinase, putative similar to ribokir pkb-type carbohydrate kinase family on    | 98   | 129  | 151  | 151  | 168  | 131  | 126  | 150  | 0.84     | 0.262090 | 80   | 83   | 97   | 124  | 99   | 93   | 98   | 95   | 87   | 102  | 0.85     | 0.134445 | 105      | 0.83     | 0.172558 |          |
| 260835_at   | At1g06700 | protein kinase interactor, putative simi serine/threonine protein kinase, putative  | 323  | 463  | 486  | 490  | 556  | 410  | 424  | 485  | 0.87     | 0.405111 | 294  | 337  | 308  | 530  | 408  | 398  | 420  | 396  | 313  | 431  | 0.31     | 0.015287 | 446      | 0.70     | 0.004079 |          |
| 260776_at   | At1g14580 | zinc finger protein, putative similar to z-zinc finger (C2H2 type) family protein   | 146  | 212  | 191  | 236  | 309  | 161  | 183  | 235  | 0.78     | 0.330249 | 145  | 169  | 153  | 238  | 190  | 138  | 244  | 208  | 156  | 211  | 0.74     | 0.027202 | 201      | 0.78     | 0.098695 |          |
| 260777_at   | At1g14560 | mitochondrial carrier protein, putative / mitochondrial substrate carrier family on | 62   | 74   | 80   | 91   | 100  | 82   | 72   | 91   | 0.80     | 0.206603 | 68   | 52   | 67   | 80   | 73   | 68   | 78   | 62   | 78   | 68   | 0.79     | 0.045902 | 77       | 0.80     | 0.046627 |          |
| 260778_at   | At1g14640 | solcinoic factor, putative similar to humi SWAP (Suppressor-of-White-Apico)vis      | 27   | 41   | 48   | 44   | 56   | 37   | 39   | 46   | 0.84     | 0.430279 | 19   | 24   | 24   | 23   | 24   | 18   | 26   | 22   | 23   | 23   | 1.00     | 0.967606 | 22       | 1.04     | 0.752286 |          |
| 260779_at   | At1g      |                                                                                     |      |      |      |      |      |      |      |      |          |          |      |      |      |      |      |      |      |      |      |      |          |          |          |          |          |          |

|             |           |                                                                                     |      |      |      |      |      |      |      |      |          |          |      |      |      |      |      |      |      |      |      |      |          |          |          |          |          |          |
|-------------|-----------|-------------------------------------------------------------------------------------|------|------|------|------|------|------|------|------|----------|----------|------|------|------|------|------|------|------|------|------|------|----------|----------|----------|----------|----------|----------|
| 260763_at   | At1g49220 | RING-H2 finger protein RHA3a, putative zinc finger (C3HC4-type RING finger) fa      | 15   | 16   | 24   | 22   | 17   | 23   | 18   | 21   | 0.88     | 0.505850 | 20   | 15   | 22   | 16   | 19   | 15   | 18   | 17   | 19   | 17   | 1.13     | 0.249304 | 16       | 1.16     | 0.314761 |          |
| 260764_at   | At1g48950 | unknown protein : expressed protein                                                 | 121  | 169  | 180  | 167  | 182  | 143  | 157  | 164  | 0.96     | 0.748914 | 98   | 97   | 107  | 128  | 111  | 95   | 135  | 130  | 101  | 120  | 0.84     | 0.108586 | 11       | 0.90     | 0.349474 |          |
| 260765_at   | At1g49240 | actin 8 almost identical to actin 8 Gt16: actin 8 (ACT8) // actin 2 (ACT2)          | 508  | 708  | 647  | 608  | 687  | 662  | 621  | 586  | 1.06     | 0.714508 | 403  | 345  | 383  | 353  | 483  | 389  | 569  | 592  | 597  | 517  | 0.73     | 0.032783 | 475      | 0.79     | 0.124836 |          |
| 260766_at   | At1g49160 | unknown protein : supported by full-length NADH-ubiquinone oxidoreductase-related   | 207  | 431  | 431  | 453  | 380  | 220  | 210  | 231  | 0.91     | 0.865380 | 167  | 211  | 239  | 238  | 239  | 239  | 239  | 239  | 239  | 239  | 0.97     | 0.249304 | 266      | 0.99     | 0.249304 |          |
| 260767_s_at | At1g49140 | unknown protein : supported by full-length NADH-ubiquinone oxidoreductase-related   | 2048 | 2538 | 2490 | 2571 | 2849 | 2538 | 2359 | 2653 | 0.89     | 0.186768 | 2478 | 2877 | 2899 | 3362 | 2782 | 2511 | 3018 | 2993 | 2751 | 2933 | 0.94     | 0.424718 | 2855     | 0.95     | 0.664399 |          |
| 260768_at   | At1g49245 | Expressed protein : supported by full-length expressed protein                      | 100  | 117  | 126  | 131  | 152  | 118  | 114  | 134  | 0.86     | 0.204020 | 147  | 147  | 144  | 217  | 174  | 181  | 160  | 167  | 146  | 180  | 0.81     | 0.043620 | 101      | 0.77     | 0.029353 |          |
| 260769_at   | At1g49010 | Expressed protein : supported by full-length myb family transcription factor        | 79   | 136  | 113  | 135  | 133  | 107  | 109  | 125  | 0.87     | 0.448776 | 502  | 95   | 116  | 151  | 106  | 107  | 115  | 110  | 167  | 146  | 118      | 0.89     | 0.308644 | 121      | 0.86     | 0.355086 |
| 260770_at   | At1g49200 | RING-H2 finger protein RHA3a, putative zinc finger (C3HC4-type RING finger) fa      | 47   | 73   | 68   | 58   | 68   | 46   | 63   | 57   | 1.09     | 0.448776 | 51   | 51   | 58   | 62   | 65   | 54   | 49   | 51   | 57   | 51   | 1.06     | 0.339401 | 51       | 0.92     | 0.456589 |          |
| 260771_at   | At1g49160 | serine/threonine protein kinase, putative protein kinase family protein             | 42   | 49   | 51   | 36   | 43   | 35   | 47   | 38   | 1.25     | 0.057807 | 26   | 30   | 32   | 24   | 22   | 22   | 22   | 22   | 22   | 22   | 0.91     | 0.002914 | 23       | 1.29     | 0.025582 |          |
| 260772_at   | At1g49050 | unknown protein contains similarity to r_ aspartyl protease family protein          | 241  | 166  | 244  | 221  | 218  | 197  | 217  | 212  | 1.02     | 0.853114 | 305  | 306  | 282  | 340  | 303  | 253  | 350  | 326  | 298  | 314  | 0.95     | 0.514240 | 299      | 1.00     | 0.777891 |          |
| 260738_at   | At1g41990 | hydrophobic protein predicted by gene expressed protein                             | 150  | 206  | 238  | 276  | 324  | 291  | 198  | 297  | 0.67     | 0.028211 | 182  | 211  | 229  | 348  | 255  | 227  | 263  | 237  | 207  | 266  | 0.78     | 0.089791 | 277      | 0.75     | 0.147178 |          |
| 260739_at   | At1g15000 | serine carboxypeptidase precursor, cu serine carboxypeptidase S10 family prot       | 345  | 411  | 431  | 652  | 568  | 519  | 396  | 580  | 0.68     | 0.07089  | 633  | 570  | 398  | 920  | 886  | 771  | 936  | 878  | 617  | 878  | 0.70     | 0.030824 | 859      | 0.72     | 0.008671 |          |
| 260740_at   | At1g15020 | hydrophobic protein contains Pfam prc thioneddin family protein                     | 111  | 164  | 168  | 139  | 185  | 127  | 147  | 150  | 0.98     | 0.989622 | 129  | 133  | 142  | 174  | 144  | 135  | 140  | 147  | 135  | 148  | 0.91     | 0.205793 | 151      | 0.89     | 0.249215 |          |
| 260741_at   | At1g15045 | hydrophobic protein contains Pfam prf glutamine amidotransferase-related            | 68   | 89   | 100  | 44   | 46   | 44   | 86   | 45   | 1.92     | 0.011804 | 64   | 76   | 63   | 38   | 32   | 34   | 46   | 39   | 68   | 38   | 1.79     | 0.000618 | 35       | 1.95     | 0.002261 |          |
| 260742_at   | At1g15050 | putative glycerol kinase identical to SP_ acinar-responsible AUXIAA family protein  | 24   | 23   | 34   | 31   | 29   | 30   | 27   | 30   | 0.90     | 0.425410 | 15   | 14   | 27   | 23   | 13   | 19   | 21   | 19   | 19   | 19   | 0.98     | 0.926680 | 18       | 1.02     | 0.937976 |          |
| 260743_at   | At1g15040 | unknown protein : expressed protein                                                 | 31   | 39   | 48   | 50   | 49   | 39   | 49   | 0.80 | 0.122205 | 23       | 30   | 34   | 23   | 22   | 27   | 24   | 27   | 29   | 25   | 118  | 0.142735 | 24       | 1.22     | 0.206881 |          |          |
| 260744_at   | At1g15010 | unknown protein : expressed protein                                                 | 83   | 85   | 91   | 131  | 143  | 105  | 82   | 75   | 0.91     | 0.009815 | 50   | 50   | 62   | 75   | 70   | 55   | 64   | 59   | 54   | 65   | 0.83     | 0.098231 | 67       | 0.81     | 0.144105 |          |
| 260714_at   | At1g14980 | chaperonin CPN10 identical to SP-P34: 10 kDa chaperonin (CPN10)                     | 1791 | 1946 | 1933 | 2283 | 2310 | 2284 | 1890 | 2292 | 0.82     | 0.001346 | 2166 | 2218 | 2578 | 2817 | 2393 | 2102 | 2172 | 2300 | 2321 | 2357 | 0.98     | 0.856965 | 2437     | 0.95     | 0.658396 |          |
| 260715_at   | At1g48200 | hydrophobic protein predicted by gene expressed protein                             | 133  | 164  | 149  | 189  | 208  | 180  | 148  | 186  | 0.80     | 0.088466 | 157  | 168  | 181  | 242  | 198  | 174  | 209  | 195  | 169  | 203  | 0.83     | 0.088466 | 204      | 0.83     | 0.167131 |          |
| 260716_at   | At1g48130 | peroxiredoxin identical to SP-04005 f peroxiredoxin (PER1) / rehydri, putative      | 19   | 35   | 33   | 443  | 33   | 24   | 29   | 167  | 0.17     | 0.376521 | 22   | 26   | 32   | 21   | 17   | 15   | 21   | 21   | 27   | 19   | 1.41     | 0.029180 | 18       | 1.53     | 0.052064 |          |
| 260717_at   | At1g48120 | serine/threonine phosphatase PP7, pu calcineurin-like phosphoesterase family        | 68   | 80   | 77   | 105  | 95   | 82   | 75   | 94   | 0.80     | 0.006915 | 50   | 50   | 62   | 75   | 70   | 55   | 64   | 59   | 54   | 65   | 0.83     | 0.098231 | 67       | 0.81     | 0.144105 |          |
| 260718_at   | At1g48110 | unknown protein                                                                     | 192  | 222  | 228  | 295  | 277  | 235  | 214  | 269  | 0.80     | 0.058330 | 188  | 156  | 208  | 233  | 191  | 167  | 215  | 220  | 184  | 205  | 0.90     | 0.303166 | 197      | 0.93     | 0.612310 |          |
| 260719_at   | At1g48090 | unknown protein                                                                     | 305  | 376  | 361  | 373  | 408  | 289  | 347  | 356  | 0.97     | 0.837678 | 253  | 233  | 262  | 331  | 288  | 205  | 334  | 306  | 249  | 293  | 0.85     | 0.221324 | 275      | 0.91     | 0.539346 |          |
| 260720_at   | At1g48095 | hydrophobic protein predicted by gene expressed protein                             | 37   | 41   | 70   | 50   | 50   | 59   | 49   | 53   | 0.93     | 0.743810 | 36   | 48   | 48   | 38   | 34   | 38   | 57   | 43   | 44   | 42   | 1.04     | 0.787952 | 37       | 1.20     | 0.156666 |          |
| 260721_at   | At1g48080 | hydrophobic protein predicted by gene F-box family protein                          | 15   | 13   | 17   | 17   | 21   | 22   | 15   | 20   | 0.76     | 0.061947 | 15   | 17   | 16   | 17   | 15   | 13   | 19   | 16   | 16   | 16   | 1.01     | 0.903776 | 15       | 1.07     | 0.445412 |          |
| 260722_at   | At1g48040 | protein phosphatase-2C, putative siml protein phosphatase 2C-related / PP2C-        | 44   | 52   | 53   | 68   | 68   | 52   | 50   | 63   | 0.79     | 0.103249 | 50   | 59   | 57   | 81   | 58   | 46   | 67   | 65   | 65   | 63   | 0.87     | 0.334758 | 62       | 0.89     | 0.568434 |          |
| 260723_at   | At1g48070 | unknown protein                                                                     | 21   | 18   | 35   | 21   | 28   | 29   | 25   | 26   | 0.95     | 0.832486 | 14   | 14   | 16   | 11   | 14   | 14   | 16   | 9    | 14   | 13   | 1.14     | 0.295091 | 13       | 1.13     | 0.184067 |          |
| 260724_at   | At1g48140 | unknown protein : supported by full-length dolichol-cholesterol mannosyltransferase | 333  | 425  | 433  | 449  | 535  | 383  | 397  | 456  | 0.87     | 0.343637 | 454  | 419  | 421  | 662  | 504  | 502  | 504  | 474  | 431  | 529  | 0.81     | 0.075774 | 556      | 0.78     | 0.082747 |          |
| 260725_at   | At1g48170 | Expressed protein : supported by full-length expressed protein                      | 254  | 320  | 322  | 352  | 368  | 518  | 299  | 346  | 0.86     | 0.151879 | 319  | 373  | 359  | 547  | 410  | 387  | 353  | 360  | 350  | 417  | 0.84     | 0.159578 | 448      | 0.78     | 0.136077 |          |
| 260726_at   | At1g48160 | small acid-soluble protein 19 kDa orct signal recognition particle 19 kDa protein   | 439  | 404  | 377  | 439  | 380  | 370  | 419  | 418  | 0.83     | 0.054336 | 422  | 464  | 440  | 528  | 432  | 432  | 432  | 432  | 432  | 432  | 0.94     | 0.504238 | 514      | 0.92     | 0.367486 |          |
| 260727_at   | At1g48100 | polysialyltransferase PG1, putative simli glycoside hydrolase family 28 protein / p | 322  | 317  | 354  | 725  | 601  | 536  | 275  | 621  | 0.44     | 0.014224 | 167  | 167  | 221  | 572  | 393  | 342  | 265  | 259  | 185  | 366  | 0.51     | 0.058028 | 436      | 0.42     | 0.025559 |          |
| 260728_at   | At1g48210 | Pto kinase interactor 1, putative simlar serine/threonine protein kinase, putative  | 196  | 251  | 274  | 302  | 354  | 294  | 240  | 317  | 0.76     | 0.062338 | 277  | 302  | 283  | 418  | 338  | 293  | 331  | 303  | 288  | 336  | 0.85     | 0.152847 | 350      | 0.82     | 0.170946 |          |
| 260729_at   | At1g48050 | regulatory protein, putative contains PI Ksulf family protein                       | 169  | 210  | 251  | 246  | 257  | 195  | 210  | 233  | 0.90     | 0.450015 | 158  | 135  | 178  | 221  | 185  | 157  | 203  | 187  | 157  | 191  | 0.82     | 0.091827 | 188      | 0.84     | 0.239368 |          |
| 260730_at   | At1g48030 | isoamide dehydrogenase precursor id dihydrofolate dehydrogenase 1, mit              | 747  | 930  | 917  | 1024 | 1066 | 882  | 865  | 991  | 0.87     | 0.156553 | 766  | 730  | 836  | 1027 | 848  | 771  | 872  | 855  | 777  | 875  | 0.89     | 0.157667 | 882      | 0.88     | 0.217137 |          |
| 260731_at   | At1g17500 | P-tye ATPase, putative similar to GB: haloacid dehalogenase-like hydrolase fa       | 139  | 142  | 173  | 206  | 200  | 222  | 152  | 153  | 0.79     | 0.055465 | 116  | 110  | 133  | 155  | 125  | 114  | 137  | 131  | 119  | 132  | 0.90     | 0.248937 | 131      | 0.91     | 0.436758 |          |
| 260732_at   | At1g17520 | mvb-related DNA-binding protein, puta DNA-binding protein, putative                 | 193  | 231  | 288  | 266  | 278  | 225  | 238  | 256  | 0.93     | 0.592020 | 194  | 235  | 228  | 298  | 219  | 228  | 247  | 219  | 219  | 242  | 0.90     | 0.321679 | 248      | 0.88     | 0.346680 |          |
| 260733_at   | At1g17640 | RNA-binding protein, putative similar t RNA recognition motif (RRM)-containing      | 104  | 147  | 184  | 145  | 161  | 129  | 145  | 145  | 1.00     | 0.994874 | 133  | 146  | 132  | 171  | 146  | 140  | 165  | 171  | 137  | 159  | 0.86     | 0.056831 | 152      | 0.90     | 0.209513 |          |
| 260734_at   | At1g17630 | disease resistance protein RPP1-WsA disease resistance protein (TIR-NBS-LR          | 17   | 18   | 22   | 22   | 20   | 19   | 21   | 0.93 | 0.541038 | 16       | 19   | 19   | 17   | 17   | 14   | 20   | 15   | 18   | 17   | 17   | 1.09     | 0.435828 | 17       | 1.02     | 0.296567 |          |
| 260735_at   | At1g17610 | disease resistance protein, putative sir disease resistance protein-related         | 29   | 37   | 46   | 45   | 43   | 39   | 37   | 42   | 0.89     | 0.423694 | 26   | 28   | 31   | 42   | 33   | 32   | 37   | 37   | 28   | 36   | 0.78     | 0.024975 | 36       | 0.80     | 0.112877 |          |
| 260736_at   | At1g17630 | hydrophobic protein predicted by gene pentatricopeptide (PPR) repeat-containi       | 52   | 68   | 72   | 70   | 83   | 74   | 64   | 75   | 0.85     | 0.197533 | 37   | 41   | 48   | 49   | 40   | 41   | 44   | 42   | 42   | 43   | 0.98     | 0.770634 | 43       | 0.98     | 0.826932 |          |
| 260737_at   | At1g17540 | receptor-like serine threonine kinase, c_ protein kinase-related                    | 59   | 60   | 91   | 83   | 80   | 74   | 70   | 79   | 0.89     | 0.456556 | 34   | 27   | 39   | 44   | 33   | 44   | 53   | 40   | 34   | 43   | 0.78     | 0.124345 | 40       | 0.83     | 0.271853 |          |
| 260710_at   | At1g17545 | protein phosphatase 2C, putative simli protein phosphatase 2C-related / PP2C-       | 51   | 61   | 42   | 48   | 47   | 40   | 44   | 44   | 0.91     | 0.461913 | 23   | 26   | 32   | 30   | 29   | 29   | 23   | 29   | 23   | 29   | 0.91     | 0.351231 | 28       | 0.96     | 0.702884 |          |
| 260711_at   | At1g17580 | myosin, putative similar to myosin Gt14 myosin, putative                            | 203  | 282  | 252  | 266  | 310  | 246  | 260  | 0.94 | 0.075218 | 161      | 140  | 181  | 205  | 187  | 198  | 166  | 180  | 182  | 168  | 185  | 0.82     | 0.072302 | 168      | 0.85     | 0.168032 |          |
| 260712_at   | At1g17550 | protein phosphatase 2C, putative siml protein phosphatase 2C-related / PP2C-        | 263  | 376  | 440  | 462  | 506  | 387  | 360  | 452  | 0.80     | 0.213428 | 194  | 172  | 222  | 305  | 243  | 235  | 264  | 269  | 196  | 263  | 0.74     | 0.012894 | 261      | 0.75     | 0.067566 |          |
| 260713_at   | At1g17615 | disease resistance protein RPP1-WsA disease resistance protein (TIR-NBS-LR          | 9    | 9    | 16   | 11   | 12   | 12   | 11   | 12   | 0.91     | 0.703360 | 9    | 8    | 10   | 9    | 6    | 9    | 9    | 10   | 9    | 9    | 1.07     | 0.604526 | 8        | 1.14     | 0.424703 |          |
| 260682_at   | At1g17510 | hydrophobic protein predicted by gene expressed protein                             | 385  | 444  | 444  | 533  | 562  | 487  | 424  | 527  | 0.80     | 0.025258 | 504  | 507  | 488  | 701  | 583  | 532  | 538  | 515  | 500  | 574  | 0.87     | 0.154338 | 605      | 0.83     | 0.104522 |          |
| 260683_at   | At1g17560 | ribosomal protein, putative similar to G ribosomal protein L14 family protein       | 738  | 730  | 917  | 981  | 738  | 730  | 917  | 981  | 0.77     | 0.194569 | 423  | 809  | 824  | 1256 | 1031 | 932  | 925  | 824  | 973  | 1073 | 0.88     | 0.321554 | 1073     | 0.80     | 0.096911 |          |
| 260684_at   |           |                                                                                     |      |      |      |      |      |      |      |      |          |          |      |      |      |      |      |      |      |      |      |      |          |          |          |          |          |          |

|           |           |                                                                                       |      |      |      |      |      |      |      |          |          |          |      |      |      |      |      |      |      |      |          |      |          |          |      |          |          |
|-----------|-----------|---------------------------------------------------------------------------------------|------|------|------|------|------|------|------|----------|----------|----------|------|------|------|------|------|------|------|------|----------|------|----------|----------|------|----------|----------|
| 260676_at | At1g19430 | unknown protein ; supported by cDNA: dehydration-responsive protein-related           | 202  | 282  | 279  | 323  | 354  | 279  | 254  | 319      | 0.80     | 0.130685 | 187  | 140  | 190  | 228  | 202  | 177  | 199  | 190  | 172      | 199  | 0.87     | 0.151627 | 202  | 0.85     | 0.239914 |
| 260676_at | At1g19450 | integral membrane protein, putative s1                                                | 104  | 141  | 150  | 166  | 163  | 143  | 132  | 157      | 0.84     | 0.179343 | 113  | 91   | 120  | 128  | 106  | 82   | 119  | 110  | 108      | 109  | 0.99     | 0.934041 | 105  | 1.02     | 0.878418 |
| 260677_at | At1g07910 | transition elongation factor EF-1 alpha expressed protein                             | 117  | 142  | 160  | 161  | 172  | 138  | 139  | 157      | 0.89     | 0.326134 | 143  | 133  | 146  | 174  | 158  | 122  | 158  | 147  | 141      | 152  | 0.93     | 0.398828 | 151  | 0.93     | 0.535957 |
| 260678_at | At1g07970 | hypothetical protein predicted by gene expressed protein                              | 336  | 447  | 484  | 502  | 580  | 408  | 416  | 494      | 0.84     | 0.302893 | 391  | 319  | 371  | 558  | 433  | 408  | 449  | 434  | 360      | 426  | 0.93     | 0.045902 | 466  | 0.77     | 0.102670 |
| 260679_at | At1g07990 | unknown protein /// S1T4 choshatzase                                                  | 167  | 216  | 237  | 229  | 260  | 214  | 207  | 234      | 0.88     | 0.329404 | 129  | 128  | 153  | 190  | 157  | 130  | 189  | 178  | 136      | 169  | 0.81     | 0.093620 | 159  | 0.86     | 0.302124 |
| 260680_at | At1g08000 | GATA transcription factor 3, putative s1 zinc finger (GATA type) protein ///          | 228  | 267  | 246  | 300  | 350  | 253  | 247  | 301      | 0.82     | 0.148945 | 264  | 265  | 296  | 362  | 347  | 331  | 316  | 275  | 275      | 326  | 0.84     | 0.051670 | 347  | 0.79     | 0.006188 |
| 260681_at | At1g08020 | hypothetical protein predicted by gene expressed protein                              | 60   | 73   | 71   | 91   | 97   | 83   | 68   | 90       | 0.76     | 0.017312 | 45   | 50   | 67   | 58   | 47   | 50   | 54   | 47   | 55       | 65   | 0.84     | 0.115596 | 57   | 0.81     | 0.144102 |
| 260682_at | At1g08030 | hypothetical protein predicted by gene expressed protein                              | 117  | 147  | 157  | 167  | 187  | 130  | 141  | 157      | 0.82     | 0.302893 | 94   | 102  | 112  | 112  | 112  | 110  | 104  | 124  | 124      | 110  | 0.82     | 0.109414 | 124  | 0.75     | 0.087244 |
| 260684_at | At1g08050 | unknown protein                                                                       | 69   | 88   | 88   | 85   | 118  | 88   | 82   | 97       | 0.84     | 0.296582 | 63   | 56   | 92   | 60   | 65   | 61   | 66   | 67   | 70       | 64   | 1.10     | 0.454685 | 62   | 1.14     | 0.487851 |
| 260649_at | At1g08080 | storage protein, putative similar to GB: carbonic anhydrase family protein            | 21   | 25   | 29   | 33   | 38   | 29   | 25   | 34       | 0.75     | 0.086393 | 19   | 22   | 21   | 21   | 17   | 19   | 19   | 22   | 21       | 19   | 1.07     | 0.333185 | 19   | 1.10     | 0.235953 |
| 260619_at | At1g08110 | oxaloxase I, putative similar to GBV1: lactonolactonase lyase, putative / olvux       | 540  | 831  | 918  | 861  | 1070 | 766  | 763  | 899      | 0.85     | 0.402014 | 759  | 934  | 831  | 1236 | 1024 | 955  | 1004 | 969  | 842      | 1038 | 0.81     | 0.044839 | 1072 | 0.79     | 0.079664 |
| 260620_at | At1g08070 | unknown protein                                                                       | 31   | 35   | 45   | 45   | 44   | 38   | 37   | 42       | 0.88     | 0.1904   | 29   | 27   | 27   | 33   | 30   | 23   | 37   | 26   | 27       | 30   | 0.92     | 0.460253 | 29   | 0.95     | 0.655718 |
| 260621_at | At1g08065 | carbonic anhydrase, putative                                                          | 32   | 35   | 43   | 26   | 31   | 26   | 26   | 26       | 0.85     | 0.086393 | 19   | 22   | 21   | 20   | 21   | 25   | 22   | 26   | 21       | 21   | 1.21     | 0.019809 | 20   | 1.20     | 0.002642 |
| 260622_at | At1g07980 | hypothetical protein predicted by gene histone-like transcription factor (CBF/NF      | 186  | 224  | 235  | 246  | 276  | 230  | 215  | 251      | 0.86     | 0.148409 | 236  | 264  | 272  | 373  | 272  | 266  | 276  | 258  | 258      | 289  | 0.89     | 0.324824 | 304  | 0.85     | 0.271163 |
| 260623_at | At1g08090 | high-affinity nitrate transporter NRT2.1: high-affinity nitrate transporter (ACH1)    | 41   | 55   | 65   | 65   | 68   | 56   | 54   | 63       | 0.85     | 0.302044 | 40   | 39   | 47   | 46   | 41   | 41   | 45   | 43   | 42       | 43   | 0.97     | 0.571717 | 43   | 0.98     | 0.808084 |
| 260624_at | At1g08100 | high-affinity nitrate transporter ACH2.1: high-affinity nitrate transporter (ACH2)    | 410  | 500  | 69   | 54   | 52   | 58   | 54   | 55       | 0.98     | 0.853802 | 41   | 41   | 63   | 45   | 47   | 41   | 47   | 48   | 48       | 46   | 1.06     | 0.642388 | 44   | 1.09     | 0.612286 |
| 260625_at | At1g08060 | storage protein, putative similar to GB: MOM1                                         | 233  | 260  | 251  | 279  | 210  | 225  | 246  | 0.91     | 0.520369 | 164      | 128  | 167  | 199  | 168  | 168  | 205  | 189  | 153  | 166      | 0.83 | 0.058556 | 178      | 0.86 | 0.204290 |          |
| 260626_at | At1g08040 | storage protein, putative similar to GB: expressed protein                            | 410  | 500  | 544  | 462  | 553  | 420  | 485  | 478      | 1.01     | 0.914669 | 493  | 451  | 495  | 601  | 517  | 474  | 487  | 483  | 480      | 513  | 0.94     | 0.357899 | 531  | 0.90     | 0.272662 |
| 260627_at | At1g62310 | hypothetical protein predicted by gene transcription factor jumoni (imc) domain       | 51   | 85   | 100  | 91   | 120  | 80   | 79   | 97       | 0.81     | 0.380202 | 65   | 53   | 59   | 68   | 65   | 58   | 66   | 67   | 59       | 65   | 0.90     | 0.118897 | 64   | 0.92     | 0.320181 |
| 260628_at | At1g62320 | hypothetical protein predicted by gene arer-responsive to dehydration protein-i       | 44   | 67   | 58   | 54   | 56   | 54   | 56   | 54       | 0.97     | 0.855690 | 41   | 55   | 51   | 50   | 38   | 46   | 44   | 51   | 49       | 46   | 1.06     | 0.533602 | 45   | 1.09     | 0.499473 |
| 260629_at | At1g62330 | unknown protein                                                                       | 99   | 131  | 118  | 159  | 135  | 116  | 148  | 0.79     | 0.054469 | 119      | 107  | 131  | 164  | 141  | 120  | 130  | 129  | 119  | 137      | 0.87 | 0.164965 | 142      | 0.84 | 0.192726 |          |
| 260630_at | At1g62340 | subtilisin-like serine protease contains : subtilisin-like serine protease / abnormal | 21   | 27   | 27   | 31   | 32   | 28   | 25   | 30       | 0.83     | 0.095916 | 22   | 24   | 26   | 23   | 19   | 22   | 18   | 23   | 24       | 21   | 1.13     | 0.139856 | 21   | 1.11     | 0.221794 |
| 260631_at | At1g62350 | hypothetical protein predicted by gene pentatricopeptide (PPR) repeat-containi        | 42   | 51   | 66   | 68   | 63   | 69   | 53   | 67       | 0.79     | 0.124749 | 43   | 47   | 60   | 50   | 46   | 48   | 51   | 57   | 50       | 50   | 1.00     | 0.995161 | 48   | 1.05     | 0.669310 |
| 260632_at | At1g62360 | homeobox protein, putative similar to h homeobox protein SHOOT MERISTEM               | 34   | 64   | 31   | 88   | 94   | 70   | 43   | 84       | 0.51     | 0.033037 | 22   | 28   | 27   | 75   | 64   | 48   | 53   | 47   | 26       | 57   | 0.45     | 0.050228 | 62   | 0.41     | 0.010629 |
| 260633_at | At1g62400 | protein kinase, putative similar to prote protein kinase, putative                    | 13   | 18   | 15   | 21   | 21   | 25   | 15   | 22       | 0.69     | 0.031286 | 15   | 20   | 20   | 19   | 16   | 18   | 17   | 20   | 18       | 17   | 1.04     | 0.703772 | 17   | 1.08     | 0.545434 |
| 260634_at | At1g62410 | initiation factor isozyme 4F p82 subunit HME4G domain-containing protein              | 16   | 17   | 21   | 19   | 23   | 16   | 18   | 19       | 0.92     | 0.563858 | 15   | 14   | 20   | 15   | 17   | 17   | 18   | 15   | 16       | 16   | 0.99     | 0.958415 | 16   | 1.01     | 0.960738 |
| 260635_at | At1g62420 | unknown protein                                                                       | 87   | 106  | 147  | 145  | 152  | 127  | 113  | 141      | 0.80     | 0.222335 | 61   | 75   | 74   | 95   | 84   | 82   | 78   | 84   | 70       | 85   | 0.83     | 0.021720 | 87   | 0.80     | 0.043780 |
| 260636_at | At1g62430 | hypothetical protein contains similarly i galactosyltransferase / CDF                 | 201  | 271  | 305  | 328  | 395  | 278  | 259  | 333      | 0.78     | 0.180334 | 186  | 151  | 183  | 243  | 229  | 219  | 240  | 237  | 173      | 234  | 0.74     | 0.000848 | 230  | 0.75     | 0.011474 |
| 260637_at | At1g62380 | ACC oxidase, putative similar to ACC 1: 1-aminocyclopropane-1-carboxylate oxid        | 409  | 680  | 575  | 1330 | 998  | 968  | 555  | 1099     | 0.50     | 0.017927 | 1074 | 1158 | 1181 | 2600 | 1821 | 1638 | 1764 | 1756 | 1138     | 1936 | 0.59     | 0.013486 | 2053 | 0.55     | 0.033407 |
| 260638_at | At1g62590 | hypothetical protein similar to putative cysc oxidase-likeProx1-like (PB1) dom        | 259  | 361  | 369  | 403  | 301  | 369  | 0.91 | 0.046345 | 31       | 25       | 30   | 32   | 26   | 27   | 24   | 35   | 33   | 29   | 30       | 30   | 0.95     | 0.622460 | 28   | 1.03     | 0.789120 |
| 260639_at | At1g53180 | hypothetical protein predicted by gene expressed protein                              | 31   | 47   | 34   | 40   | 40   | 30   | 37   | 1.01     | 0.938056 | 31       | 25   | 30   | 32   | 26   | 27   | 24   | 35   | 33   | 29       | 30   | 0.95     | 0.622460 | 28   | 1.03     | 0.789120 |
| 260640_at | At1g53350 | viral resistance protein, putative similar to glucose resistance protein (CC-NBS-LR   | 86   | 109  | 107  | 84   | 99   | 86   | 101  | 102      | 1.16     | 0.276717 | 87   | 109  | 107  | 95   | 80   | 74   | 96   | 101  | 101      | 89   | 1.13     | 0.222068 | 83   | 1.22     | 0.138077 |
| 260641_at | At1g53210 | hypothetical protein predicted by gene expressed protein                              | 89   | 124  | 122  | 133  | 146  | 109  | 112  | 130      | 0.86     | 0.321960 | 97   | 88   | 104  | 132  | 123  | 102  | 116  | 106  | 96       | 116  | 0.83     | 0.052447 | 119  | 0.81     | 0.088153 |
| 260642_at | At1g53260 | hypothetical protein, putative similar to plant hypothetical protein                  | 43   | 47   | 45   | 45   | 43   | 42   | 44   | 45       | 0.95     | 0.043677 | 37   | 44   | 44   | 41   | 43   | 33   | 38   | 37   | 42       | 39   | 1.08     | 0.348576 | 39   | 1.07     | 0.546338 |
| 260643_at | At1g53270 | hypothetical protein contains similarly i ABC transporter family protein              | 19   | 17   | 24   | 26   | 23   | 21   | 24   | 0.86     | 0.331324 | 16       | 18   | 19   | 21   | 19   | 18   | 19   | 18   | 19   | 18       | 19   | 0.92     | 0.202493 | 19   | 0.91     | 0.285505 |
| 260644_at | At1g53290 | hypothetical protein contains similarly i galactosyltransferase family protein        | 241  | 311  | 263  | 350  | 370  | 286  | 271  | 335      | 0.81     | 0.121984 | 294  | 308  | 304  | 467  | 367  | 339  | 351  | 303  | 302      | 366  | 0.83     | 0.133587 | 391  | 0.77     | 0.083386 |
| 260645_at | At1g53300 | hypothetical protein predicted by gene thioredoxin family protein                     | 132  | 138  | 127  | 166  | 169  | 133  | 132  | 156      | 0.85     | 0.122675 | 99   | 86   | 116  | 138  | 103  | 82   | 104  | 105  | 100      | 106  | 0.94     | 0.678646 | 108  | 0.93     | 0.711743 |
| 260646_at | At1g53310 | hypothetical protein similar to CHP-rich DC1 domain-containing protein                | 19   | 21   | 25   | 22   | 28   | 22   | 19   | 23       | 0.89     | 0.369971 | 22   | 18   | 20   | 19   | 15   | 20   | 17   | 19   | 18       | 11   | 1.11     | 0.291892 | 19   | 1.05     | 0.373588 |
| 260612_at | At1g53360 | hypothetical protein similar to hypophy1-F-box family protein-related                 | 18   | 19   | 23   | 21   | 24   | 23   | 20   | 23       | 0.89     | 0.245760 | 16   | 17   | 16   | 14   | 14   | 19   | 18   | 12   | 16       | 16   | 1.05     | 0.693540 | 16   | 1.02     | 0.837807 |
| 260613_at | At1g53380 | unknown protein                                                                       | 247  | 351  | 367  | 443  | 465  | 354  | 322  | 421      | 0.76     | 0.121865 | 186  | 186  | 219  | 296  | 222  | 205  | 256  | 247  | 197      | 245  | 0.86     | 0.073943 | 241  | 0.82     | 0.217025 |
| 260614_at | At1g53390 | hypothetical protein contains Pfam orof ABC transporter family protein                | 236  | 295  | 307  | 352  | 389  | 304  | 279  | 348      | 0.80     | 0.102937 | 234  | 225  | 276  | 335  | 293  | 238  | 282  | 271  | 245      | 284  | 0.86     | 0.156879 | 288  | 0.85     | 0.246935 |
| 260615_at | At1g53240 | mitochondrial NAD-dependent malic c malate dehydrogenase (NAD), mitochon              | 801  | 924  | 812  | 1152 | 1121 | 970  | 846  | 1081     | 0.78     | 0.026283 | 867  | 852  | 975  | 1344 | 987  | 905  | 1063 | 911  | 835      | 1030 | 0.91     | 0.425695 | 1079 | 0.87     | 0.362002 |
| 260616_at | At1g53280 | hypothetical protein contains Pfam prof D1.1 family protein                           | 620  | 692  | 652  | 691  | 580  | 577  | 677  | 677      | 0.85     | 0.259049 | 622  | 594  | 622  | 895  | 732  | 692  | 729  | 678  | 613      | 702  | 0.91     | 0.011802 | 677  | 0.97     | 0.048756 |
| 260617_at | At1g53345 | unknown protein ; supported by full-length expressed protein                          | 47   | 51   | 51   | 60   | 61   | 55   | 49   | 58       | 0.84     | 0.011708 | 42   | 39   | 45   | 75   | 44   | 54   | 54   | 51   | 42       | 56   | 0.75     | 0.096621 | 57   | 0.73     | 0.166385 |
| 260618_at | At1g53230 | flower development protein cycloidea ( TCP family transcription factor 3 (TCP3)       | 144  | 155  | 134  | 142  | 147  | 122  | 144  | 137      | 1.05     | 0.489761 | 138  | 142  | 163  | 156  | 119  | 102  | 142  | 129  | 148      | 130  | 1.14     | 0.233708 | 126  | 1.17     | 0.287626 |
| 260587_at | At1g53210 | unknown protein ; supported by cDNA: sodium/calcium exchanger family 3                | 1347 | 1726 | 1866 | 1793 | 2004 | 1425 | 1646 | 1740     | 0.95     | 0.026865 | 1158 | 1004 | 1121 | 1522 | 1118 | 1269 | 1604 | 1570 | 1094     | 1477 | 0.74     | 0.004750 | 1403 | 0.78     | 0.023634 |
| 260588_at | At1g53320 | unknown protein contains similarity to h f-box family protein / lubby family prote    | 416  | 545  | 525  | 735  | 542  | 545  | 545  | 545      | 0.95     | 0.450697 | 524  | 545  | 545  | 793  | 635  | 635  | 725  | 777  | 0.014940 | 606  | 0.81     | 0.068862 |      |          |          |
| 260589_at | At1g53400 | hypothetical protein predicted by gene expressed protein                              | 389  | 496  | 565  | 514  | 621  | 464  | 474  | 533      | 0.89     | 0.479724 | 459  | 454  | 471  | 662  | 564  | 519  | 557  | 519  | 461      | 564  | 0.82     | 0.025807 | 581  | 0.79     |          |

|             |           |                                         |                                         |      |      |      |      |      |      |      |      |          |          |      |      |      |      |      |      |      |      |      |      |          |          |      |          |          |
|-------------|-----------|-----------------------------------------|-----------------------------------------|------|------|------|------|------|------|------|------|----------|----------|------|------|------|------|------|------|------|------|------|------|----------|----------|------|----------|----------|
| 260581_at   | A12g47190 | MYB transcription factor (Atmyb2)       | myb family transcription factor (MYB2)  | 25   | 28   | 38   | 35   | 38   | 36   | 30   | 36   | 0.83     | 0.195540 | 25   | 30   | 33   | 31   | 23   | 27   | 30   | 29   | 29   | 28   | 1.06     | 0.583061 | 27   | 1.09     | 0.540712 |
| 260582_at   | A12g47200 | hypothetical protein predicted by geneF | expressed protein                       | 15   | 17   | 23   | 20   | 26   | 20   | 19   | 22   | 0.84     | 0.135287 | 10   | 11   | 15   | 15   | 16   | 12   | 16   | 14   | 12   | 15   | 0.81     | 0.104227 | 14   | 0.82     | 0.247801 |
| 260583_x_at | A12g47220 | putative odonibulin-binding odoshorovi  | 3' exoribonuclease family domain 1      | 36   | 47   | 42   | 55   | 60   | 48   | 42   | 54   | 0.97     | 0.058936 | 26   | 33   | 34   | 35   | 28   | 31   | 39   | 34   | 31   | 33   | 0.93     | 0.449776 | 31   | 0.99     | 0.902487 |
| 260524_at   | A12g47230 | unknown protein                         | unknown protein                         | 171  | 269  | 299  | 269  | 269  | 215  | 211  | 269  | 0.90     | 0.147262 | 154  | 215  | 191  | 154  | 164  | 154  | 167  | 154  | 154  | 154  | 0.92     | 0.405097 | 179  | 0.97     | 0.931248 |
| 260525_at   | A12g47250 | unknown protein                         | unknown protein                         | 276  | 364  | 333  | 367  | 400  | 295  | 324  | 354  | 0.92     | 0.054200 | 242  | 216  | 246  | 340  | 273  | 249  | 329  | 309  | 335  | 300  | 0.78     | 0.034025 | 287  | 0.82     | 0.142627 |
| 260526_at   | A12g47410 | unknown protein                         | unknown protein                         | 279  | 338  | 400  | 365  | 472  | 322  | 339  | 386  | 0.88     | 0.449277 | 256  | 212  | 269  | 310  | 303  | 220  | 305  | 279  | 246  | 283  | 0.87     | 0.192682 | 278  | 0.88     | 0.395786 |
| 260527_at   | A12g47270 | unknown protein                         | unknown protein                         | 8    | 7    | 16   | 7    | 8    | 9    | 10   | 8    | 1.30     | 0.485265 | 11   | 11   | 9    | 17   | 12   | 18   | 22   | 16   | 11   | 17   | 0.63     | 0.025169 | 16   | 0.68     | 0.059671 |
| 260528_at   | A12g47300 | unknown protein                         | unknown protein                         | 77   | 65   | 77   | 65   | 75   | 63   | 77   | 71   | 1.09     | 0.453366 | 45   | 44   | 40   | 46   | 41   | 11   | 37   | 42   | 42   | 11   | 1.11     | 0.081031 | 47   | 1.01     | 0.031248 |
| 260529_at   | A12g47400 | unknown protein                         | unknown protein                         | 1604 | 2718 | 2933 | 2185 | 2612 | 2076 | 2419 | 2291 | 1.06     | 0.787713 | 1931 | 2627 | 2039 | 2843 | 1926 | 2076 | 2665 | 2663 | 2199 | 2435 | 0.90     | 0.446247 | 2282 | 0.96     | 0.828016 |
| 260530_at   | A12g47320 | unknown protein                         | unknown protein                         | 1095 | 1264 | 1237 | 1508 | 1568 | 1287 | 1199 | 1454 | 0.82     | 0.063478 | 1434 | 1433 | 1556 | 1879 | 1683 | 1440 | 1482 | 1406 | 1475 | 1578 | 0.93     | 0.431987 | 1667 | 0.88     | 0.221689 |
| 260531_at   | A12g47240 | unknown protein                         | unknown protein                         | 481  | 703  | 486  | 833  | 925  | 663  | 557  | 807  | 0.69     | 0.077513 | 385  | 300  | 370  | 402  | 373  | 323  | 317  | 346  | 352  | 352  | 1.00     | 0.985847 | 366  | 0.96     | 0.701636 |
| 260532_at   | A12g47330 | unknown protein                         | unknown protein                         | 122  | 145  | 140  | 170  | 188  | 132  | 137  | 163  | 0.84     | 0.226623 | 97   | 88   | 99   | 154  | 126  | 88   | 114  | 105  | 95   | 107  | 0.88     | 0.164020 | 106  | 0.90     | 0.346590 |
| 260533_at   | A12g45370 | unknown protein                         | unknown protein                         | 117  | 166  | 178  | 120  | 167  | 123  | 154  | 137  | 1.12     | 0.054200 | 242  | 153  | 157  | 177  | 148  | 146  | 144  | 131  | 152  | 149  | 1.02     | 0.739380 | 157  | 0.97     | 0.645243 |
| 260534_at   | A12g43380 | hypothetical protein predicted by graII | hypothetical protein predicted by graII | 38   | 43   | 49   | 44   | 44   | 41   | 46   | 0.90 | 0.133042 | 30       | 37   | 39   | 29   | 27   | 33   | 28   | 31   | 35   | 30   | 1.19 | 0.054427 | 30       | 1.19 | 0.140567 |          |
| 260535_at   | A12g43390 | hypothetical protein predicted by geneF | expressed protein                       | 19   | 16   | 25   | 19   | 21   | 19   | 20   | 20   | 1.01     | 0.971114 | 18   | 26   | 26   | 17   | 18   | 15   | 17   | 16   | 23   | 17   | 1.40     | 0.016472 | 16   | 1.41     | 0.067961 |
| 260536_at   | A12g43400 | unknown protein                         | unknown protein                         | 291  | 256  | 299  | 224  | 265  | 193  | 249  | 228  | 1.09     | 0.604399 | 173  | 186  | 199  | 242  | 187  | 157  | 191  | 193  | 186  | 194  | 0.96     | 0.671912 | 195  | 0.95     | 0.731434 |
| 260537_at   | A12g43450 | unknown protein                         | unknown protein                         | 13   | 19   | 21   | 22   | 16   | 17   | 20   | 0.88 | 0.448827 | 16       | 16   | 19   | 12   | 20   | 19   | 22   | 18   | 17   | 18   | 0.95 | 0.704936 | 17       | 1.01 | 0.999950 |          |
| 260538_at   | A12g43460 | unknown protein                         | unknown protein                         | 2268 | 2787 | 2477 | 2496 | 2933 | 2234 | 2511 | 2554 | 0.98     | 0.872512 | 2672 | 2693 | 2549 | 3304 | 2845 | 2570 | 2700 | 2602 | 2638 | 2750 | 0.96     | 0.382035 | 2816 | 0.94     | 0.277901 |
| 260539_at   | A12g43480 | unknown protein                         | unknown protein                         | 13   | 13   | 19   | 15   | 17   | 19   | 15   | 17   | 0.88     | 0.444137 | 13   | 16   | 17   | 13   | 14   | 13   | 15   | 13   | 15   | 13   | 1.15     | 0.070771 | 13   | 1.17     | 0.111288 |
| 260540_at   | A12g43500 | unknown protein                         | unknown protein                         | 91   | 143  | 154  | 166  | 177  | 121  | 129  | 155  | 0.84     | 0.380418 | 113  | 101  | 124  | 148  | 126  | 107  | 135  | 132  | 112  | 130  | 0.87     | 0.141334 | 127  | 0.89     | 0.344197 |
| 260541_at   | A12g43530 | unknown protein                         | unknown protein                         | 1287 | 1528 | 1639 | 1978 | 1927 | 1629 | 1484 | 1911 | 0.78     | 0.019337 | 2101 | 2042 | 2187 | 2856 | 2628 | 2459 | 3503 | 3410 | 2110 | 2971 | 0.71     | 0.021672 | 2448 | 0.80     | 0.011970 |
| 260542_at   | A12g43560 | unknown protein                         | unknown protein                         | 253  | 445  | 334  | 350  | 363  | 334  | 350  | 0.98 | 0.921656 | 357      | 465  | 486  | 575  | 451  | 402  | 517  | 501  | 436  | 489  | 0.89 | 0.319787 | 476      | 0.92 | 0.574634 |          |
| 260543_at   | A12g43330 | unknown protein                         | unknown protein                         | 257  | 440  | 561  | 340  | 390  | 285  | 436  | 338  | 1.29     | 0.369901 | 219  | 224  | 236  | 281  | 232  | 219  | 258  | 251  | 226  | 248  | 0.91     | 0.192447 | 244  | 0.93     | 0.423221 |
| 260544_at   | A12g43540 | unknown protein                         | unknown protein                         | 148  | 171  | 213  | 196  | 179  | 172  | 172  | 182  | 0.97     | 0.817646 | 218  | 226  | 218  | 281  | 241  | 218  | 340  | 314  | 221  | 279  | 0.79     | 0.099799 | 247  | 0.89     | 0.228928 |
| 260545_at   | A12g43550 | unknown protein                         | unknown protein                         | 252  | 344  | 354  | 400  | 446  | 329  | 317  | 391  | 0.81     | 0.189336 | 453  | 423  | 440  | 629  | 528  | 519  | 422  | 426  | 439  | 505  | 0.87     | 0.245577 | 559  | 0.79     | 0.029461 |
| 260546_at   | A12g43520 | unknown protein                         | unknown protein                         | 59   | 230  | 80   | 173  | 105  | 82   | 123  | 120  | 1.02     | 0.986528 | 67   | 69   | 78   | 69   | 62   | 65   | 94   | 71   | 71   | 72   | 0.99     | 0.908550 | 66   | 1.09     | 0.191911 |
| 260547_at   | A12g43550 | unknown protein                         | unknown protein                         | 432  | 320  | 193  | 325  | 392  | 357  | 228  | 358  | 0.64     | 0.060888 | 278  | 303  | 295  | 405  | 443  | 446  | 666  | 656  | 292  | 523  | 0.56     | 0.022577 | 431  | 0.68     | 0.000796 |
| 260548_at   | A12g43360 | unknown protein                         | unknown protein                         | 172  | 495  | 443  | 594  | 580  | 462  | 457  | 545  | 0.84     | 0.126784 | 453  | 453  | 500  | 712  | 573  | 511  | 507  | 488  | 469  | 558  | 0.84     | 0.160816 | 599  | 0.78     | 0.016149 |
| 260549_at   | A12g43535 | unknown protein                         | unknown protein                         | 72   | 90   | 118  | 98   | 101  | 100  | 103  | 0.93 | 0.644466 | 128      | 155  | 132  | 215  | 232  | 210  | 289  | 294  | 138  | 246  | 0.56 | 0.005994 | 216      | 0.64 | 0.030320 |          |
| 260550_at   | A12g43620 | unknown protein                         | unknown protein                         | 405  | 500  | 459  | 551  | 405  | 405  | 405  | 0.94 | 0.045566 | 392      | 454  | 462  | 462  | 462  | 462  | 462  | 462  | 462  | 462  | 462  | 0.82     | 0.091481 | 464  | 0.79     | 0.156269 |
| 260551_at   | A12g43510 | unknown protein                         | unknown protein                         | 41   | 66   | 75   | 63   | 76   | 59   | 61   | 66   | 0.92     | 0.652216 | 51   | 66   | 66   | 46   | 42   | 47   | 75   | 69   | 61   | 56   | 1.09     | 0.616721 | 45   | 1.35     | 0.039590 |
| 260552_at   | A12g43430 | unknown protein                         | unknown protein                         | 204  | 275  | 354  | 285  | 307  | 237  | 278  | 277  | 1.00     | 0.984421 | 270  | 303  | 272  | 415  | 309  | 297  | 329  | 301  | 282  | 330  | 0.85     | 0.159514 | 340  | 0.83     | 0.208499 |
| 260553_at   | A12g41800 | unknown protein                         | unknown protein                         | 54   | 72   | 60   | 205  | 161  | 107  | 62   | 158  | 0.39     | 0.028775 | 40   | 40   | 52   | 108  | 80   | 77   | 90   | 88   | 44   | 89   | 0.50     | 0.001223 | 89   | 0.50     | 0.014062 |
| 260554_at   | A12g41790 | unknown protein                         | unknown protein                         | 315  | 428  | 438  | 438  | 484  | 315  | 380  | 428  | 0.89     | 0.347464 | 129  | 134  | 149  | 173  | 143  | 127  | 154  | 160  | 134  | 151  | 0.89     | 0.107051 | 148  | 0.91     | 0.435297 |
| 260555_at   | A12g41780 | unknown protein                         | unknown protein                         | 44   | 48   | 55   | 44   | 43   | 49   | 45   | 1.09 | 0.363517 | 39       | 50   | 44   | 61   | 45   | 44   | 42   | 44   | 44   | 47   | 0.94 | 0.596986 | 50       | 0.89 | 0.410321 |          |
| 260521_at   | A12g41740 | unknown protein                         | unknown protein                         | 149  | 177  | 180  | 214  | 225  | 158  | 168  | 199  | 0.85     | 0.251185 | 102  | 103  | 134  | 148  | 120  | 99   | 118  | 126  | 113  | 122  | 0.92     | 0.490671 | 122  | 0.92     | 0.617501 |
| 260522_x_at | A12g41730 | unknown protein                         | unknown protein                         | 14   | 19   | 21   | 18   | 23   | 24   | 18   | 22   | 0.88     | 0.279359 | 19   | 19   | 23   | 19   | 18   | 15   | 26   | 21   | 20   | 20   | 1.03     | 0.844306 | 17   | 1.17     | 0.195961 |
| 260523_at   | A12g41720 | unknown protein                         | unknown protein                         | 168  | 168  | 169  | 194  | 162  | 168  | 181  | 0.88 | 0.347464 | 129      | 134  | 149  | 173  | 143  | 127  | 154  | 160  | 134  | 151  | 0.89 | 0.107051 | 148      | 0.91 | 0.435297 |          |
| 260492_at   | A12g41850 | unknown protein                         | unknown protein                         | 25   | 33   | 41   | 37   | 43   | 42   | 33   | 41   | 0.81     | 0.187469 | 23   | 25   | 25   | 29   | 23   | 25   | 26   | 28   | 24   | 26   | 0.93     | 0.259005 | 26   | 0.95     | 0.507597 |
| 260493_at   | A12g41830 | unknown protein                         | unknown protein                         | 39   | 39   | 48   | 55   | 53   | 49   | 42   | 53   | 0.80     | 0.041228 | 35   | 39   | 46   | 46   | 43   | 49   | 41   | 42   | 40   | 43   | 0.93     | 0.353205 | 43   | 0.92     | 0.410778 |
| 260494_at   | A12g41820 | unknown protein                         | unknown protein                         | 79   | 123  | 84   | 184  | 191  | 152  | 96   | 175  | 0.54     | 0.012018 | 88   | 58   | 84   | 162  | 139  | 119  | 101  | 107  | 77   | 126  | 0.61     | 0.024760 | 140  | 0.55     | 0.015095 |
| 260495_at   | A12g41810 | unknown protein                         | unknown protein                         | 19   | 28   | 28   | 32   | 29   | 32   | 28   | 24   | 0.51     | 0.043316 | 22   | 25   | 27   | 24   | 25   | 24   | 23   | 27   | 20   | 24   | 1.03     | 0.699428 | 24   | 1.02     | 0.727201 |
| 260496_at   | A12g41700 | unknown protein                         | unknown protein                         | 214  | 258  | 248  | 267  | 202  | 258  | 248  | 1.04 | 0.831188 | 214      | 184  | 200  | 296  | 237  | 204  | 296  | 252  | 237  | 204  | 296  | 0.79     | 0.047532 | 293  | 0.86     | 0.126581 |
| 260497_at   | A12g41840 | unknown protein                         | unknown protein                         | 3042 | 3635 | 3630 | 3610 | 4081 | 3305 | 3435 | 3665 | 0.94     | 0.485360 | 3305 | 3650 | 3473 | 4154 | 3750 | 3242 | 3882 | 3858 | 3476 | 3777 | 0.92     | 0.205030 | 3716 | 0.94     | 0.443226 |
| 260498_at   | A12g41710 | unknown protein                         | unknown protein                         | 114  | 173  | 162  | 141  | 154  | 112  | 149  | 135  | 1.10     | 0.560338 | 157  | 187  | 144  | 181  | 140  | 143  | 166  | 165  | 163  | 159  | 1.03     | 0.781431 | 155  | 1.05     | 0.670889 |
| 260499_at   | A12g41760 | unknown protein                         | unknown protein                         | 171  | 219  | 218  | 254  | 266  | 204  | 203  | 241  | 0.84     | 0.191382 | 214  | 211  | 225  | 215  | 247  | 238  | 256  | 255  | 217  | 262  | 0.83     | 0.047326 | 267  | 0.81     | 0.112332 |
| 260500_at   | A12g41705 | unknown protein                         | unknown protein                         | 137  | 184  | 179  | 204  | 248  | 180  | 156  | 211  | 0.79     | 0.144096 | 162  | 151  | 177  | 163  | 205  | 191  | 161  | 188  | 210  | 0.78 | 0.046325 | 210      | 0.78 | 0.046325 |          |
| 260501_at   | A12g41770 | unknown protein                         | unknown protein                         | 147  | 162  | 178  | 207  | 222  | 177  | 162  | 202  | 0.80     | 0.065518 | 139  | 123  | 163  | 200  | 176  | 139  | 173  | 162  | 142  | 170  | 0.83     | 0.120438 | 172  | 0.82     | 0.226639 |
| 260502_at   |           |                                         |                                         |      |      |      |      |      |      |      |      |          |          |      |      |      |      |      |      |      |      |      |      |          |          |      |          |          |

|             |           |                                                                                         |                                                                     |      |      |      |      |      |      |      |      |          |          |      |      |      |      |      |      |      |      |      |      |          |          |          |          |          |          |
|-------------|-----------|-----------------------------------------------------------------------------------------|---------------------------------------------------------------------|------|------|------|------|------|------|------|------|----------|----------|------|------|------|------|------|------|------|------|------|------|----------|----------|----------|----------|----------|----------|
| 260458_at   | At1g68250 | unknown protein                                                                         | expressed protein                                                   | 17   | 18   | 25   | 36   | 23   | 22   | 20   | 27   | 0.74     | 0.234567 | 14   | 17   | 14   | 18   | 16   | 18   | 27   | 16   | 15   | 19   | 0.78     | 0.201004 | 17       | 0.85     | 0.096660 |          |
| 260459_at   | At1g68240 | hypothehtical protein predicted by densc                                                | hypothehtical protein                                               | 16   | 20   | 22   | 37   | 22   | 18   | 19   | 26   | 0.76     | 0.368984 | 15   | 17   | 17   | 22   | 14   | 14   | 16   | 19   | 16   | 17   | 0.95     | 0.720332 | 17       | 0.96     | 0.845765 |          |
| 260460_at   | At1g68230 | unknown protein                                                                         | reduction family protein (RTNLB14)                                  | 70   | 72   | 112  | 86   | 123  | 89   | 85   | 99   | 0.86     | 0.476874 | 82   | 104  | 89   | 120  | 87   | 88   | 107  | 111  | 92   | 103  | 0.89     | 0.311232 | 98       | 0.93     | 0.626588 |          |
| 260430_at   | At1g68200 | putative zinc finger protein similar to CC zinc finger (CCCH-type) family protein       |                                                                     | 75   | 109  | 113  | 108  | 107  | 97   | 102  | 104  | 0.89     | 0.360391 | 65   | 60   | 66   | 77   | 74   | 74   | 64   | 75   | 77   | 74   | 1.05     | 0.796987 | 74       | 1.14     | 0.025458 |          |
| 260431_at   | At1g68190 | putative zinc finger protein similar to zir zinc finger (B-box type) family protein     |                                                                     | 30   | 54   | 49   | 30   | 25   | 44   | 28   | 157  | 0.967077 | 35       | 44   | 37   | 32   | 23   | 26   | 34   | 33   | 39   | 30   | 1.30 | 0.043719 | 27       | 1.42     | 0.037902 |          |          |
| 260432_at   | At1g68150 | putative DNA binding protein similar to WRKY family transcription factor                |                                                                     | 14   | 12   | 16   | 17   | 18   | 19   | 14   | 18   | 0.81     | 0.052650 | 13   | 9    | 25   | 11   | 16   | 13   | 14   | 11   | 16   | 13   | 1.19     | 0.540594 | 13       | 1.17     | 0.683828 |          |
| 260433_at   | At1g68170 | MIN21-like protein similar to MIN21 GB nodulin MIN21 family protein                     |                                                                     | 36   | 47   | 49   | 78   | 69   | 74   | 44   | 74   | 0.60     | 0.003882 | 59   | 55   | 56   | 67   | 60   | 57   | 55   | 48   | 56   | 57   | 0.99     | 0.848988 | 61       | 0.92     | 0.230979 |          |
| 260434_at   | At1g68330 | hypothehtical protein predicted by densc                                                | expressed protein                                                   | 24   | 37   | 40   | 47   | 41   | 43   | 43   | 37   | 0.76     | 0.009068 | 39   | 37   | 43   | 41   | 38   | 41   | 38   | 37   | 40   | 38   | 1.37     | 0.515362 | 40       | 0.70     | 0.700419 |          |
| 260435_at   | At1g68320 | putative transcription factor similar to C myb family transcription factor (MYB62)      |                                                                     | 22   | 24   | 36   | 27   | 34   | 33   | 27   | 31   | 0.88     | 0.484713 | 21   | 15   | 19   | 15   | 16   | 16   | 22   | 18   | 18   | 17   | 1.04     | 0.735091 | 16       | 1.15     | 0.208810 |          |
| 260436_at   | At1g68140 | unknown protein                                                                         | expressed protein                                                   | 337  | 568  | 578  | 497  | 563  | 445  | 494  | 502  | 0.99     | 0.936047 | 430  | 446  | 418  | 622  | 483  | 450  | 493  | 476  | 431  | 505  | 0.85     | 0.119457 | 518      | 0.83     | 0.176999 |          |
| 260437_at   | At1g68380 | hypothehtical protein predicted by densc                                                | expressed protein                                                   | 19   | 24   | 25   | 28   | 27   | 27   | 23   | 27   | 0.83     | 0.054122 | 18   | 21   | 22   | 22   | 17   | 16   | 19   | 20   | 21   | 19   | 1.10     | 0.350629 | 18       | 1.12     | 0.402626 |          |
| 260438_at   | At1g68290 | putative bifunctional nuclease similar to bifunctional nuclease, putative               |                                                                     | 31   | 45   | 56   | 27   | 30   | 29   | 44   | 28   | 1.55     | 0.003917 | 118  | 162  | 146  | 22   | 19   | 25   | 30   | 25   | 149  | 25   | 0.92     | 0.000104 | 24       | 6.35     | 0.002527 |          |
| 260439_at   | At1g68340 | hypothehtical protein predicted by densc                                                | expressed protein                                                   | 65   | 97   | 93   | 88   | 95   | 84   | 85   | 89   | 0.96     | 0.738666 | 86   | 93   | 89   | 111  | 78   | 81   | 107  | 96   | 89   | 95   | 0.94     | 0.555086 | 90       | 0.99     | 0.864091 |          |
| 260440_at   | At1g68160 | hypothehtical protein predicted by densc                                                | expressed protein                                                   | 163  | 228  | 277  | 249  | 286  | 205  | 223  | 247  | 0.90     | 0.585572 | 339  | 286  | 300  | 416  | 403  | 343  | 397  | 368  | 308  | 385  | 0.80     | 0.010509 | 387      | 0.80     | 0.045243 |          |
| 260441_at   | At1g68260 | unknown protein                                                                         | supported by full-len thioesterase family protein                   | 170  | 230  | 226  | 278  | 318  | 247  | 209  | 281  | 0.74     | 0.061422 | 245  | 274  | 282  | 486  | 403  | 333  | 317  | 343  | 314  | 267  | 0.99     | 0.74     | 0.081223 | 379      | 0.70     | 0.112229 |
| 260442_at   | At1g68220 | unknown protein                                                                         | supported by full-len universal stress protein                      | 721  | 985  | 1083 | 1067 | 1260 | 956  | 929  | 1094 | 0.85     | 0.303855 | 829  | 960  | 924  | 1326 | 1091 | 1045 | 1217 | 1105 | 904  | 1157 | 0.78     | 0.173946 | 1154     | 0.78     | 0.058783 |          |
| 260443_at   | At1g68240 | unknown protein                                                                         | supported by full-len expressed protein                             | 244  | 264  | 254  | 288  | 302  | 281  | 290  | 290  | 0.88     | 0.024166 | 197  | 158  | 232  | 268  | 218  | 174  | 281  | 278  | 195  | 243  | 0.81     | 0.182715 | 246      | 0.80     | 0.528775 |          |
| 260444_at   | At1g68300 | unknown protein                                                                         | supported by full-len universal stress protein (USP) family protein | 290  | 458  | 489  | 470  | 522  | 418  | 412  | 470  | 0.88     | 0.451261 | 491  | 559  | 514  | 766  | 548  | 585  | 584  | 560  | 521  | 609  | 0.86     | 0.164187 | 633      | 0.82     | 0.185943 |          |
| 260445_at   | At1g68370 | ARG1 protein (Altered Response to Gr) arably-responsive protein / altered resp          |                                                                     | 143  | 179  | 177  | 179  | 202  | 161  | 166  | 181  | 0.92     | 0.432459 | 162  | 150  | 168  | 247  | 173  | 163  | 186  | 179  | 160  | 190  | 0.84     | 0.189689 | 195      | 0.82     | 0.267084 |          |
| 260446_at   | At1g72420 | unknown protein                                                                         | chaperone-related                                                   | 142  | 193  | 182  | 211  | 240  | 185  | 172  | 212  | 0.81     | 0.150382 | 204  | 231  | 208  | 313  | 214  | 216  | 246  | 230  | 214  | 244  | 0.88     | 0.285272 | 248      | 0.86     | 0.378685 |          |
| 260447_at   | At1g72410 | hypothehtical protein similar to N-term of COP1-interacting protein-related             |                                                                     | 152  | 192  | 169  | 252  | 285  | 198  | 167  | 217  | 0.42     | 0.000452 | 139  | 126  | 16   | 15   | 16   | 13   | 15   | 15   | 15   | 15   | 1.01     | 0.928796 | 15       | 1.01     | 0.920342 |          |
| 260448_at   | At1g72400 | hypothehtical protein predicted by densc                                                | COP1-interacting protein-related                                    | 99   | 134  | 133  | 140  | 153  | 111  | 122  | 134  | 0.91     | 0.505195 | 112  | 104  | 123  | 146  | 126  | 105  | 139  | 123  | 113  | 128  | 0.89     | 0.201321 | 125      | 0.90     | 0.395496 |          |
| 260449_at   | At1g72390 | unknown protein                                                                         | expressed protein                                                   | 179  | 200  | 200  | 224  | 241  | 198  | 193  | 221  | 0.87     | 0.127633 | 162  | 166  | 179  | 231  | 183  | 156  | 187  | 180  | 169  | 187  | 0.90     | 0.309293 | 190      | 0.89     | 0.402771 |          |
| 260450_at   | At1g72380 | hypothehtical protein predicted by densc                                                | expressed protein                                                   | 28   | 29   | 38   | 45   | 43   | 43   | 32   | 44   | 0.72     | 0.022511 | 23   | 24   | 28   | 28   | 19   | 24   | 26   | 24   | 25   | 24   | 1.02     | 0.860725 | 24       | 1.04     | 0.756312 |          |
| 260451_at   | At1g72360 | putative AP2 domain transcription factor ethylene-responsive element-binding pr         |                                                                     | 57   | 64   | 80   | 74   | 82   | 75   | 67   | 77   | 0.88     | 0.257104 | 49   | 61   | 63   | 65   | 60   | 51   | 80   | 68   | 58   | 65   | 0.90     | 0.380040 | 56       | 0.99     | 0.524608 |          |
| 260452_at   | At1g72350 | putative SRF-type transcription factor c MADS-box protein (AGL60)                       |                                                                     | 23   | 21   | 35   | 28   | 29   | 25   | 26   | 28   | 0.95     | 0.797156 | 20   | 16   | 18   | 16   | 17   | 15   | 23   | 15   | 18   | 17   | 1.06     | 0.686820 | 16       | 1.14     | 0.161100 |          |
| 260453_s_at | At1g72510 | unknown protein                                                                         | expressed protein                                                   | 124  | 185  | 179  | 188  | 157  | 119  | 163  | 155  | 1.05     | 0.795054 | 186  | 159  | 129  | 275  | 212  | 179  | 340  | 289  | 158  | 122  | 0.81     | 0.045299 | 322      | 0.71     | 0.122865 |          |
| 260454_at   | At1g72310 | RING-H2 zinc finger protein (ATL3) ide zinc finger (C3HC4-type RING finger) fa          |                                                                     | 248  | 337  | 321  | 373  | 425  | 321  | 302  | 373  | 0.81     | 0.157314 | 241  | 258  | 304  | 404  | 316  | 284  | 317  | 313  | 268  | 327  | 0.82     | 0.090960 | 334      | 0.80     | 0.174690 |          |
| 260455_at   | At1g72500 | hypothehtical protein predicted by densc                                                | inter-alpha-thiosein inhibitor heavv chain-                         | 78   | 157  | 86   | 198  | 198  | 167  | 107  | 188  | 0.57     | 0.040963 | 83   | 68   | 85   | 177  | 175  | 145  | 182  | 153  | 79   | 166  | 0.47     | 0.001655 | 165      | 0.48     | 0.001747 |          |
| 260456_at   | At1g72490 | hypothehtical protein                                                                   | expressed protein                                                   | 22   | 27   | 27   | 22   | 24   | 20   | 22   | 23   | 0.87     | 0.000000 | 23   | 24   | 25   | 22   | 12   | 21   | 32   | 27   | 24   | 24   | 0.83     | 0.727476 | 28       | 0.80     | 0.000000 |          |
| 260457_at   | At1g72480 | unknown protein                                                                         | expressed protein                                                   | 335  | 354  | 414  | 503  | 555  | 406  | 368  | 488  | 0.75     | 0.072863 | 275  | 237  | 273  | 375  | 337  | 296  | 314  | 300  | 262  | 325  | 0.81     | 0.026298 | 336      | 0.78     | 0.045852 |          |
| 260423_at   | At1g72470 | unknown protein                                                                         | excoyst subunit EXO70 family protein                                | 60   | 63   | 59   | 85   | 92   | 82   | 60   | 86   | 0.70     | 0.003123 | 50   | 46   | 51   | 75   | 70   | 55   | 69   | 64   | 49   | 66   | 0.74     | 0.008219 | 67       | 0.74     | 0.042199 |          |
| 260424_at   | At1g72460 | putative receptor-like protein kinase cc leucine-rich repeat transmembrane prot         |                                                                     | 35   | 55   | 41   | 39   | 41   | 37   | 35   | 39   | 0.89     | 0.276513 | 28   | 34   | 34   | 33   | 28   | 28   | 29   | 30   | 32   | 30   | 1.08     | 0.238095 | 30       | 1.08     | 0.385511 |          |
| 260425_at   | At1g72440 | hypothehtical protein similar to CCAAT- CCAAT-box-binding transcription factor-         |                                                                     | 244  | 264  | 254  | 288  | 302  | 281  | 290  | 290  | 0.88     | 0.024166 | 197  | 158  | 232  | 268  | 218  | 174  | 281  | 278  | 195  | 243  | 0.81     | 0.182715 | 246      | 0.80     | 0.528775 |          |
| 260426_at   | At1g72370 | putative 40S ribosomal protein SA (lam 40S ribosomal protein SA (RPSaA)                 |                                                                     | 3975 | 4446 | 4493 | 4555 | 5245 | 4335 | 4305 | 4712 | 0.91     | 0.272225 | 4557 | 4791 | 4626 | 5655 | 5101 | 4516 | 5127 | 5032 | 4658 | 5086 | 0.92     | 0.132660 | 5091     | 0.91     | 0.267281 |          |
| 260427_at   | At1g72430 | hypothehtical protein predicted by densc                                                | amf auxin-responsive protein-related                                | 46   | 39   | 48   | 60   | 61   | 46   | 44   | 56   | 0.79     | 0.101686 | 85   | 100  | 70   | 84   | 50   | 56   | 58   | 48   | 55   | 59   | 1.44     | 0.052902 | 63       | 1.34     | 0.187177 |          |
| 260428_at   | At1g72340 | putative translation initiation factor EIF- eukaryotic translation initiation factor 2B |                                                                     | 306  | 331  | 333  | 365  | 399  | 333  | 323  | 366  | 0.88     | 0.113839 | 331  | 361  | 366  | 507  | 396  | 342  | 457  | 418  | 362  | 424  | 0.83     | 0.107954 | 415      | 0.85     | 0.275770 |          |
| 260429_at   | At1g72450 | unknown protein                                                                         | supported by full-len expressed protein                             | 152  | 182  | 168  | 352  | 405  | 167  | 415  | 0.40 | 0.000133 | 219      | 226  | 371  | 676  | 969  | 733  | 992  | 868  | 272  | 846  | 922  | 0.90     | 0.000991 | 793      | 0.94     | 0.007987 |          |
| 260398_at   | At1g72320 | putative RNA-binding domain contains pumilio/Puf RNA-binding domain-contains            |                                                                     | 215  | 282  | 268  | 289  | 321  | 226  | 252  | 279  | 0.90     | 0.476390 | 186  | 161  | 197  | 253  | 213  | 183  | 212  | 210  | 182  | 214  | 0.85     | 0.096933 | 216      | 0.84     | 0.202574 |          |
| 260399_at   | At1g72520 | putative lipoxenase similar to lipoxo lipoxenase, putative                              |                                                                     | 56   | 50   | 58   | 109  | 153  | 156  | 54   | 140  | 0.39     | 0.006424 | 35   | 31   | 33   | 56   | 56   | 45   | 73   | 67   | 33   | 59   | 0.56     | 0.066521 | 52       | 0.63     | 0.006469 |          |
| 260400_at   | At1g69860 | putative oecotide transporter similar to o proton-deendent oloecotide transp            |                                                                     | 34   | 38   | 44   | 39   | 37   | 43   | 38   | 40   | 0.96     | 0.688102 | 27   | 30   | 38   | 34   | 28   | 34   | 29   | 32   | 32   | 32   | 0.98     | 0.879414 | 32       | 1.00     | 0.992209 |          |
| 260401_at   | At1g69840 | unknown protein similar to hypothehtical band 7 family protein                          |                                                                     | 1603 | 1110 | 1843 | 1635 | 1678 | 1731 | 1519 | 1681 | 0.80     | 0.246931 | 1601 | 1745 | 1374 | 1981 | 1515 | 1486 | 2087 | 2103 | 1573 | 1837 | 0.86     | 0.239317 | 1661     | 0.95     | 0.675158 |          |
| 260402_at   | At1g69820 | putative gamma-glutamyltransferase II gamma-glutamyltransferase II                      |                                                                     | 40   | 50   | 58   | 67   | 55   | 43   | 45   | 58   | 0.87     | 0.024419 | 44   | 36   | 41   | 45   | 40   | 48   | 44   | 45   | 48   | 45   | 0.88     | 0.025134 | 48       | 0.85     | 0.098007 |          |
| 260403_at   | At1g69810 | hypothehtical protein predicted by densc                                                | WRKY family transcription factor                                    | 14   | 17   | 14   | 17   | 16   | 15   | 16   | 15   | 1.04     | 0.668087 | 15   | 13   | 16   | 12   | 16   | 13   | 18   | 12   | 15   | 14   | 1.03     | 0.807624 | 14       | 1.08     | 0.449059 |          |
| 260404_at   | At1g69950 | unknown protein similar to activator-like NAT-like transposase family (Hobo/Act/        |                                                                     | 91   | 105  | 109  | 122  | 138  | 92   | 102  | 117  | 0.87     | 0.337469 | 82   | 74   | 94   | 107  | 97   | 83   | 97   | 94   | 83   | 96   | 0.87     | 0.108039 | 96       | 0.87     | 0.233618 |          |
| 260405_at   | At1g69930 | putative outathione transferase similar glutathione S-transferase, putative             |                                                                     | 40   | 54   | 67   | 58   | 59   | 62   | 54   | 60   | 0.90     | 0.454950 | 42   | 42   | 49   | 45   | 38   | 38   | 46   | 40   | 44   | 42   | 1.06     | 0.400899 | 41       | 1.09     | 0.336920 |          |
| 260406_at   | At1g69920 | putative outathione transferase similar glutathione S-transferase, putative             |                                                                     | 21   | 25   | 26   | 29   | 28   | 24   | 22   | 25   | 0.89     | 0.133890 | 22   | 21   | 23   | 22   | 22   | 21   | 21   | 21   | 22   | 22   | 1.04     | 0.238737 | 22       | 1.01     | 0.590517 |          |
| 260407_at   | At1       |                                                                                         |                                                                     |      |      |      |      |      |      |      |      |          |          |      |      |      |      |      |      |      |      |      |      |          |          |          |          |          |          |

|           |           |                                                                                              |      |      |      |      |      |      |      |      |          |          |          |      |      |      |      |      |      |      |      |      |          |          |      |          |          |
|-----------|-----------|----------------------------------------------------------------------------------------------|------|------|------|------|------|------|------|------|----------|----------|----------|------|------|------|------|------|------|------|------|------|----------|----------|------|----------|----------|
| 260339_at | At1g69220 | putative serine/threonine kinase similar serine/threonine protein kinase, putative           | 268  | 309  | 344  | 313  | 331  | 276  | 307  | 307  | 1.00     | 0.997304 | 237      | 257  | 282  | 339  | 280  | 240  | 335  | 336  | 258  | 306  | 0.84     | 0.143099 | 286  | 0.90     | 0.430852 |
| 260340_at | At1g69190 | putative dihydroxyprolin pyrophosphokinase similar dihydroxyprolin pyrophosphokinase, putati | 62   | 63   | 83   | 93   | 94   | 85   | 69   | 91   | 0.77     | 0.044722 | 55       | 68   | 62   | 51   | 46   | 46   | 80   | 49   | 61   | 54   | 1.13     | 0.466087 | 48   | 1.28     | 0.028563 |
| 260341_at | At1g69170 | suamnosin-cromoter binding protein, o suamnosin cromoter-binding protein-like                | 68   | 89   | 88   | 106  | 112  | 101  | 82   | 106  | 0.77     | 0.030813 | 79       | 95   | 92   | 146  | 119  | 113  | 122  | 113  | 89   | 123  | 0.72     | 0.008903 | 126  | 0.70     | 0.029543 |
| 260342_at | At1g69280 | putative protein predicted by gene expressed protein                                         | 53   | 71   | 93   | 92   | 86   | 91   | 86   | 78   | 0.86     | 0.044722 | 46       | 47   | 50   | 48   | 52   | 43   | 43   | 48   | 48   | 45   | 1.03     | 0.988971 | 45   | 0.87     | 0.029541 |
| 260343_at | At1g69200 | fructokinase (FK1), putative similar to alpha-D-glucose carbodhydrate kinase family on       | 83   | 115  | 102  | 124  | 133  | 107  | 100  | 121  | 0.82     | 0.150817 | 99       | 85   | 101  | 130  | 114  | 100  | 101  | 95   | 95   | 108  | 0.88     | 0.205537 | 115  | 0.83     | 0.119995 |
| 260344_at | At1g69240 | polyneuridine aldehyde esterase, puta hylucrose, alpha/beta fold family protein              | 25   | 28   | 31   | 32   | 35   | 29   | 28   | 32   | 0.88     | 0.194555 | 25       | 22   | 28   | 22   | 28   | 22   | 26   | 22   | 25   | 24   | 1.05     | 0.566756 | 25   | 1.01     | 0.955252 |
| 260345_at | At1g69270 | receptor protein kinase, putative similar leucine-rich repeat family protein / protei        | 246  | 319  | 437  | 353  | 387  | 244  | 334  | 328  | 1.02     | 0.934442 | 248      | 236  | 237  | 326  | 282  | 287  | 346  | 335  | 240  | 315  | 0.76     | 0.005019 | 298  | 0.81     | 0.014864 |
| 260346_at | At1g69320 | putative protein predicted by gene expressed protein                                         | 36   | 48   | 43   | 45   | 46   | 45   | 36   | 45   | 0.95     | 0.552336 | 40       | 40   | 50   | 55   | 51   | 47   | 45   | 46   | 45   | 47   | 1.08     | 0.315271 | 45   | 0.87     | 0.029541 |
| 260347_at | At1g69420 | DHHC-type zinc finger protein, putative zinc finger (DHHC type) family protein               | 423  | 571  | 527  | 752  | 764  | 592  | 507  | 703  | 0.72     | 0.050548 | 411      | 434  | 447  | 728  | 558  | 468  | 491  | 470  | 430  | 543  | 0.79     | 0.138398 | 585  | 0.74     | 0.115071 |
| 260348_at | At1g69350 | PPR-repeat protein, putative contains i pentatricopeptide (PPR) repeat-containin             | 31   | 41   | 45   | 45   | 50   | 41   | 39   | 45   | 0.86     | 0.276077 | 33       | 32   | 37   | 42   | 41   | 36   | 39   | 39   | 34   | 39   | 0.86     | 0.020198 | 40   | 0.86     | 0.074325 |
| 260349_at | At1g69400 | mitotic checkpoint protein, putative sim transducin family protein / WD-40 repeat            | 73   | 103  | 107  | 109  | 113  | 95   | 94   | 106  | 0.89     | 0.398922 | 88       | 99   | 101  | 125  | 99   | 97   | 92   | 87   | 96   | 100  | 0.96     | 0.678282 | 107  | 0.90     | 0.326143 |
| 260350_at | At1g69410 | Eukaryotic initiation factor 5A, putative eukaryotic translation initiation factor 5A        | 107  | 1153 | 1449 | 1775 | 1891 | 1547 | 1213 | 1738 | 0.70     | 0.240002 | 1213     | 1248 | 1348 | 1830 | 1669 | 1470 | 1668 | 1597 | 1270 | 1647 | 0.77     | 0.004023 | 1656 | 0.77     | 0.025941 |
| 260351_at | At1g69380 | hypothetical protein predicted by gene expressed protein                                     | 100  | 118  | 121  | 138  | 136  | 117  | 113  | 130  | 0.87     | 0.044722 | 84       | 88   | 105  | 140  | 96   | 82   | 107  | 102  | 93   | 105  | 0.88     | 0.398972 | 106  | 0.87     | 0.518299 |
| 260352_at | At1g69295 | Expressed protein ; supported by full-length beta-1,3-glucanase-related                      | 424  | 489  | 569  | 580  | 589  | 563  | 494  | 577  | 0.86     | 0.122473 | 713      | 789  | 730  | 1076 | 802  | 745  | 775  | 747  | 744  | 829  | 0.90     | 0.358630 | 874  | 0.85     | 0.82055  |
| 260353_at | At1g69230 | putative nitrilase-associated protein sir expressed protein                                  | 142  | 152  | 176  | 150  | 192  | 155  | 157  | 166  | 0.94     | 0.620705 | 114      | 124  | 132  | 172  | 133  | 125  | 91   | 90   | 123  | 122  | 1.01     | 0.955003 | 143  | 0.86     | 0.265079 |
| 260354_at | At1g69330 | unknown protein ; supported by full-length zinc finger (C3HC4-type RING finger) fa           | 95   | 113  | 129  | 150  | 160  | 128  | 116  | 146  | 0.77     | 0.058979 | 111      | 111  | 120  | 180  | 131  | 133  | 137  | 131  | 114  | 142  | 0.80     | 0.063930 | 148  | 0.77     | 0.104789 |
| 260355_at | At1g69180 | transcription factor CRC1 identical to tra transcription factor CRC / CRABS CLAI             | 22   | 40   | 21   | 26   | 22   | 18   | 28   | 22   | 1.26     | 0.445989 | 16       | 16   | 22   | 37   | 23   | 22   | 23   | 21   | 18   | 25   | 0.71     | 0.122270 | 27   | 0.66     | 0.141792 |
| 260356_at | At1g69390 | unknown protein ; supported by full-length chloroalst division protein, putative (Mf         | 442  | 666  | 621  | 740  | 869  | 659  | 576  | 756  | 0.76     | 0.122535 | 619      | 627  | 704  | 852  | 903  | 678  | 786  | 741  | 650  | 792  | 0.82     | 0.046057 | 811  | 0.80     | 0.093577 |
| 260357_at | At1g69260 | unknown protein ; supported by full-length expressed protein                                 | 85   | 109  | 332  | 137  | 140  | 93   | 176  | 123  | 1.42     | 0.548753 | 140      | 174  | 165  | 274  | 178  | 215  | 277  | 268  | 180  | 242  | 0.66     | 0.023414 | 222  | 0.72     | 0.104415 |
| 260358_at | At1g69340 | unknown protein ; supported by cDNA: apor-1 processing enzyme family prot                    | 217  | 293  | 257  | 305  | 358  | 246  | 256  | 303  | 0.84     | 0.291261 | 261      | 227  | 264  | 307  | 293  | 237  | 284  | 272  | 251  | 278  | 0.90     | 0.174909 | 279  | 0.90     | 0.312351 |
| 260359_at | At1g69210 | hypothetical protein predicted by gene expressed protein                                     | 89   | 123  | 120  | 150  | 121  | 110  | 130  | 0.85 | 0.241317 | 118      | 127      | 129  | 170  | 123  | 125  | 131  | 124  | 125  | 135  | 0.93 | 0.454120 | 139      | 0.90 | 0.413224 |          |
| 260360_at | At1g69370 | chorismate mutase, putative contains i chorismate mutase, putative                           | 145  | 183  | 174  | 208  | 220  | 174  | 167  | 201  | 0.83     | 0.135926 | 211      | 220  | 210  | 288  | 247  | 233  | 252  | 236  | 214  | 251  | 0.85     | 0.030345 | 256  | 0.84     | 0.065835 |
| 260361_at | At1g69360 | unknown protein ; supported by cDNA: expressed protein                                       | 109  | 140  | 171  | 165  | 169  | 139  | 140  | 158  | 0.89     | 0.436626 | 93       | 95   | 101  | 141  | 124  | 101  | 125  | 123  | 97   | 123  | 0.79     | 0.022601 | 122  | 0.79     | 0.096858 |
| 260362_at | At1g70530 | outative protein kinase similar to C-term protein kinase family protein                      | 283  | 460  | 426  | 485  | 627  | 412  | 390  | 508  | 0.77     | 0.228986 | 317      | 298  | 293  | 414  | 402  | 362  | 460  | 410  | 303  | 410  | 0.74     | 0.020287 | 392  | 0.77     | 0.006589 |
| 260363_at | At1g70550 | unknown protein similar to hypothetical expressed protein                                    | 214  | 258  | 234  | 213  | 265  | 193  | 235  | 224  | 1.05     | 0.675094 | 168      | 177  | 192  | 252  | 182  | 162  | 175  | 164  | 179  | 187  | 0.96     | 0.730368 | 199  | 0.90     | 0.519199 |
| 260364_at | At1g70560 | putative alkaline similar to alkaline pre alkaline C-terminal domain-containing p            | 142  | 209  | 126  | 281  | 294  | 224  | 159  | 266  | 0.60     | 0.032677 | 122      | 107  | 137  | 227  | 172  | 149  | 146  | 133  | 122  | 166  | 0.74     | 0.115773 | 183  | 0.67     | 0.075560 |
| 260365_at | At1g70630 | hypothetical protein predicted by gene expressed protein                                     | 46   | 54   | 61   | 54   | 63   | 49   | 54   | 55   | 0.97     | 0.826853 | 37       | 36   | 43   | 51   | 41   | 36   | 42   | 42   | 39   | 42   | 0.92     | 0.360624 | 42   | 0.92     | 0.501142 |
| 260366_at | At1g70460 | outative protein kinase similar to C-term protein kinase, putative                           | 47   | 48   | 49   | 51   | 51   | 48   | 48   | 50   | 0.96     | 0.182254 | 41       | 40   | 50   | 34   | 41   | 40   | 48   | 43   | 44   | 41   | 1.07     | 0.507940 | 38   | 1.15     | 0.240807 |
| 260332_at | At1g70470 | hypothetical protein predicted by gene expressed protein                                     | 112  | 146  | 141  | 220  | 226  | 204  | 133  | 216  | 0.81     | 0.002654 | 165      | 152  | 153  | 308  | 224  | 242  | 180  | 168  | 157  | 224  | 0.70     | 0.090165 | 258  | 0.61     | 0.017792 |
| 260333_at | At1g70500 | outative polyketide synthase similar to or polyketide synthase, putative / dectinase         | 49   | 54   | 26   | 22   | 29   | 49   | 54   | 26   | 22       | 0.95     | 0.032620 | 579  | 601  | 541  | 741  | 678  | 562  | 562  | 562  | 562  | 0.92     | 0.00001  | 43   | 15.49    | 0.000104 |
| 260334_at | At1g70520 | homeotic protein (ATK1) identical to ho homeobox protein knotted-like 2 (KNA                 | 22   | 46   | 29   | 35   | 39   | 28   | 32   | 34   | 0.95     | 0.845356 | 20       | 20   | 18   | 22   | 20   | 21   | 28   | 17   | 18   | 22   | 0.81     | 0.178992 | 21   | 0.83     | 0.077539 |
| 260303_at | At1g70520 | unknown protein kinase similar to C-term protein kinase family protein                       | 304  | 387  | 410  | 305  | 362  | 257  | 367  | 308  | 1.19     | 0.254919 | 261      | 238  | 227  | 304  | 280  | 239  | 340  | 304  | 242  | 293  | 0.82     | 0.070388 | 274  | 0.88     | 0.206137 |
| 260304_at | At1g70480 | putative protein kinase identical to most of D expressed protein                             | 236  | 421  | 446  | 486  | 561  | 424  | 388  | 491  | 0.79     | 0.165317 | 460      | 428  | 480  | 735  | 633  | 587  | 567  | 547  | 456  | 608  | 0.75     | 0.019734 | 641  | 0.71     | 0.025913 |
| 260305_at | At1g70490 | outative ADP-ribosylation factor 1 near ADP-ribosylation factor, putative                    | 1487 | 1647 | 1733 | 2189 | 2131 | 1912 | 1622 | 2077 | 0.78     | 0.044683 | 1450     | 1464 | 1662 | 2446 | 1957 | 1660 | 1899 | 1842 | 1526 | 1967 | 0.78     | 0.023698 | 2021 | 0.75     | 0.016875 |
| 260306_at | At1g70540 | hypothetical protein predicted by gene expressed protein                                     | 24   | 25   | 27   | 27   | 29   | 30   | 25   | 28   | 0.89     | 0.086055 | 20       | 23   | 29   | 18   | 18   | 10   | 25   | 22   | 24   | 21   | 1.17     | 0.217438 | 18   | 1.31     | 0.077978 |
| 260307_at | At1g70620 | unknown protein similar to unknown or cydin-related                                          | 224  | 296  | 292  | 255  | 305  | 215  | 271  | 258  | 1.05     | 0.737488 | 225      | 213  | 252  | 268  | 234  | 188  | 267  | 253  | 230  | 242  | 0.95     | 0.595328 | 230  | 1.00     | 0.998148 |
| 260308_at | At1g70610 | putative ABC transporter contains Pfam ABC transporter (TAP1)                                | 159  | 208  | 215  | 256  | 285  | 209  | 194  | 250  | 0.78     | 0.119665 | 148      | 137  | 201  | 246  | 219  | 178  | 189  | 191  | 162  | 205  | 0.79     | 0.099956 | 214  | 0.75     | 0.134807 |
| 260309_at | At1g70580 | putative alanine aminotransferase simil alanylglutamate aminotransferase 2                   | 95   | 118  | 128  | 107  | 152  | 119  | 116  | 150  | 0.85     | 0.061535 | 119      | 143  | 129  | 158  | 144  | 136  | 122  | 151  | 144  | 156  | 0.73     | 0.054513 | 174  | 0.71     | 0.176524 |
| 260310_at | At1g70590 | hypothetical protein predicted by gene expressed protein                                     | 153  | 182  | 229  | 226  | 229  | 193  | 188  | 216  | 0.87     | 0.323750 | 151      | 170  | 172  | 232  | 189  | 182  | 189  | 187  | 164  | 196  | 0.84     | 0.052850 | 201  | 0.82     | 0.095030 |
| 260311_at | At1g70570 | hypothetical protein predicted by gene expressed protein                                     | 248  | 340  | 352  | 358  | 414  | 333  | 313  | 368  | 0.85     | 0.248987 | 204      | 192  | 217  | 303  | 225  | 204  | 258  | 254  | 240  | 249  | 0.82     | 0.100386 | 244  | 0.84     | 0.289549 |
| 260312_at | At1g63880 | outative disease resistance protein similar disease resistance protein (TIR-NBS-LR           | 38   | 53   | 62   | 48   | 56   | 53   | 51   | 52   | 0.97     | 0.848792 | 32       | 32   | 43   | 36   | 36   | 36   | 37   | 51   | 35   | 39   | 0.91     | 0.478308 | 36   | 0.99     | 0.928833 |
| 260313_at | At1g63870 | outative disease resistance protein sim disease resistance protein (TIR-NBS-LR               | 21   | 23   | 21   | 28   | 26   | 25   | 28   | 0.89 | 0.305793 | 13       | 13       | 22   | 18   | 16   | 17   | 19   | 16   | 17   | 19   | 16   | 0.93     | 0.625464 | 17   | 0.98     | 0.903902 |
| 260314_at | At1g63930 | unknown protein similar to putative proline-rich family protein                              | 641  | 632  | 898  | 917  | 835  | 1001 | 835  | 724  | 0.98     | 0.123028 | 903      | 995  | 895  | 1317 | 978  | 1027 | 1057 | 984  | 1074 | 1167 | 0.87     | 0.149501 | 1167 | 0.84     | 0.912441 |
| 260315_at | At1g63820 | hypothetical protein similar to C-termin hypthetical protein                                 | 31   | 36   | 49   | 36   | 39   | 39   | 38   | 1.01 | 0.931534 | 28       | 31       | 39   | 37   | 28   | 29   | 33   | 31   | 33   | 32   | 1.04 | 0.742022 | 31       | 1.05 | 0.753696 |          |
| 260316_at | At1g63810 | hypothetical protein similar to hypthetical nuclear RNA-associated family protein            | 148  | 169  | 157  | 192  | 199  | 162  | 158  | 184  | 0.86     | 0.113184 | 131      | 86   | 131  | 140  | 130  | 110  | 141  | 127  | 116  | 129  | 0.90     | 0.351447 | 126  | 0.92     | 0.583969 |
| 260317_at | At1g63800 | E2 ubiquitin-conjugating enzyme 5 (UBC5)                                                     | 200  | 360  | 390  | 367  | 448  | 325  | 317  | 380  | 0.83     | 0.412001 | 246      | 282  | 261  | 421  | 269  | 368  | 303  | 299  | 263  | 360  | 0.73     | 0.032972 | 399  | 0.66     | 0.002099 |
| 260318_at | At1g63860 | hypothetical protein predicted by gene expressed protein                                     | 53   | 60   | 74   | 60   | 63   | 53   | 53   | 60   | 0.86     | 0.077004 | 63       | 60   | 73   | 80   | 72   | 20   | 20   | 20   | 20   | 20   | 0.82     | 0.000014 | 19   | 0.76     | 0.000518 |
| 260319_at | At1g63950 | hypothetical protein predicted by gene expressed protein                                     | 229  | 325  |      |      |      |      |      |      |          |          |          |      |      |      |      |      |      |      |      |      |          |          |      |          |          |

|        |           |                                                                                     |      |      |      |      |      |      |      |      |          |          |          |     |      |      |     |     |      |      |          |      |          |           |          |          |          |          |
|--------|-----------|-------------------------------------------------------------------------------------|------|------|------|------|------|------|------|------|----------|----------|----------|-----|------|------|-----|-----|------|------|----------|------|----------|-----------|----------|----------|----------|----------|
| 260245 | At1g74230 | putative RNA-binding protein similar to glycine-rich RNA-binding protein            | 736  | 949  | 1162 | 1151 | 1319 | 1236 | 949  | 1236 | 0.77     | 0.095895 | 818      | 971 | 1011 | 1366 | 987 | 956 | 1101 | 1035 | 933      | 1089 | 0.86     | 0.195692  | 1103     | 895      | 0.304517 |          |
| 260246 | At1g74230 | hypothetical protein similar to GB-ADD: expressed protein                           | 238  | 341  | 31   | 34   | 29   | 37   | 34   | 31   | 33       | 0.93     | 0.474914 | 17  | 23   | 31   | 29  | 22  | 19   | 23   | 24       | 23   | 1.03     | 0.861235  | 24       | 0.97     | 0.887569 |          |
| 260247 | At1g74230 | outative disease resistance protein sim leucine-rich repeat family protein          | 18   | 24   | 26   | 26   | 27   | 23   | 27   | 23   | 0.85     | 0.166407 | 16       | 18  | 21   | 28   | 20  | 19  | 27   | 25   | 24       | 0.78 | 0.079623 | 22        | 0.83     | 0.267500 |          |          |
| 260248 | At1g74310 | heat shock protein 101 (HSP101) ident heat shock protein 101 (HSP101)               | 178  | 462  | 173  | 358  | 1322 | 423  | 271  | 701  | 0.39     | 0.266943 | 174      | 149 | 186  | 198  | 137 | 130 | 202  | 171  | 170      | 168  | 1.01     | 0.933004  | 155      | 1.09     | 0.577610 |          |
| 260249 | At1g74230 | unknown protein hydroxylase, alpha-hydroxy acid family protein                      | 75   | 9    | 19   | 19   | 19   | 19   | 19   | 19   | 0.90     | 0.095993 | 59       | 53  | 59   | 59   | 59  | 59  | 59   | 59   | 59       | 59   | 0.53     | 0.654498  | 59       | 0.53     | 0.085334 |          |
| 260250 | At1g74260 | putative phosphoribosylformylglycinyl AIR synthase-related family protein           | 385  | 457  | 440  | 446  | 533  | 397  | 427  | 459  | 0.93     | 0.527935 | 353      | 268 | 367  | 386  | 378 | 288 | 401  | 405  | 329      | 372  | 0.89     | 0.288674  | 351      | 0.94     | 0.651094 |          |
| 260251 | At1g74250 | putative heat shock protein similar to c DNAJ heat shock N-terminal domain-co       | 165  | 185  | 176  | 209  | 210  | 156  | 175  | 192  | 0.91     | 0.428052 | 121      | 117 | 128  | 180  | 136 | 108 | 126  | 128  | 122      | 136  | 0.90     | 0.431476  | 141      | 0.86     | 0.415508 |          |
| 260252 | At1g74240 | putative mitochondrial carrier protein in mitochondrial substrate carrier family pr | 195  | 292  | 307  | 299  | 367  | 282  | 264  | 316  | 0.84     | 0.302007 | 250      | 261 | 268  | 368  | 285 | 284 | 254  | 248  | 260      | 288  | 0.90     | 0.371435  | 312      | 0.83     | 0.139135 |          |
| 260253 | At1g74190 | disease resistance protein, outative sim leucine-rich repeat protein family         | 218  | 254  | 219  | 38   | 37   | 38   | 37   | 38   | 0.71     | 0.283711 | 257      | 231 | 242  | 337  | 21  | 27  | 23   | 29   | 25       | 27   | 0.39     | 0.548555  | 22       | 0.99     | 0.227871 |          |
| 260254 | At1g74210 | putative dihydrocholateidier chaperone chaperonin chaperonin                        | 218  | 258  | 242  | 350  | 373  | 303  | 244  | 330  | 0.74     | 0.015586 | 256      | 231 | 263  | 242  | 438 | 389 | 285  | 263  | 259      | 346  | 0.67     | 0.068406  | 382      | 0.87     | 0.027871 |          |
| 260255 | At1g74330 | outative protein kinase similar to 58S of protein kinase, putative                  | 67   | 67   | 98   | 102  | 77   | 77   | 98   | 0.78 | 0.150111 | 30       | 28       | 36  | 30   | 28   | 36  | 30  | 29   | 37   | 31       | 34   | 0.94     | 0.478362  | 31       | 1.00     | 0.960312 |          |
| 260256 | At1g74330 | outative tivo II intron maturase contain intron maturase, tivo II family protein    | 30   | 38   | 33   | 42   | 44   | 35   | 34   | 40   | 0.84     | 0.140065 | 22       | 27  | 30   | 26   | 35  | 21  | 26   | 24   | 22       | 25   | 24       | 1.05      | 0.497403 | 24       | 1.03     | 0.767113 |
| 260257 | At1g74340 | putative dolichyl-phosphate mannose donor dolichol phosphate-mannose biosynth       | 1182 | 1373 | 1400 | 462  | 534  | 403  | 462  | 534  | 0.87     | 0.116955 | 383      | 403 | 465  | 607  | 523 | 465 | 403  | 462  | 428      | 417  | 0.86     | 0.127871  | 533      | 0.78     | 0.073623 |          |
| 260258 | At1g74270 | unknown ribosomal protein similar to rib 60S ribosomal protein L35a (PR-250C)       | 1182 | 1373 | 1400 | 462  | 534  | 403  | 462  | 534  | 0.87     | 0.116955 | 383      | 403 | 465  | 607  | 523 | 465 | 403  | 462  | 428      | 417  | 0.86     | 0.127871  | 533      | 0.78     | 0.073623 |          |
| 260259 | At1g74300 | unknown protein similar to mamorkin pr esterase/lysine/histoserine family prote     | 48   | 62   | 70   | 59   | 59   | 52   | 60   | 57   | 0.50     | 0.690243 | 107      | 117 | 91   | 55   | 43  | 46  | 48   | 46   | 105      | 47   | 2.21     | 0.000995  | 48       | 2.19     | 0.002623 |          |
| 260260 | At1g68540 | outative reductase similar to cinnamoyl oxidoreductase family protein               | 46   | 65   | 70   | 74   | 75   | 62   | 60   | 70   | 0.86     | 0.303773 | 71       | 68  | 74   | 68   | 68  | 68  | 76   | 76   | 71       | 75   | 0.94     | 0.438375  | 75       | 0.95     | 0.604953 |          |
| 260261 | At1g68450 | unknown protein                                                                     | 36   | 48   | 43   | 43   | 52   | 41   | 43   | 45   | 0.94     | 0.594180 | 37       | 38  | 43   | 35   | 35  | 38  | 38   | 39   | 37       | 1.06 | 0.222411 | 36        | 1.09     | 0.177475 |          |          |
| 260262 | At1g68470 | hypothetical protein similar to hydroxyethyl oxidoreductase family protein          | 57   | 21   | 74   | 75   | 35   | 35   | 35   | 35   | 0.76     | 0.145428 | 44       | 54  | 59   | 59   | 59  | 59  | 59   | 59   | 59       | 59   | 0.87     | 0.308937  | 48       | 0.87     | 0.429279 |          |
| 260263 | At1g68480 | hypothetical protein predicted by genef: zinc finger (C2H2 type) family protein     | 27   | 43   | 31   | 56   | 76   | 58   | 34   | 63   | 0.53     | 0.021991 | 14       | 16  | 23   | 30   | 29  | 21  | 24   | 20   | 18       | 25   | 0.71     | 0.083132  | 27       | 0.66     | 0.090365 |          |
| 260264 | At1g68500 | hypothetical protein predicted by genef: expressed protein                          | 58   | 60   | 91   | 79   | 82   | 78   | 70   | 79   | 0.88     | 0.421047 | 35       | 34  | 53   | 50   | 49  | 53  | 52   | 53   | 40       | 51   | 0.79     | 0.060611  | 50       | 0.80     | 0.192286 |          |
| 260265 | At1g68150 | hypothetical protein similar to hydroxyethyl LOB domain protein 42/ lateral ornam b | 19   | 19   | 18   | 16   | 19   | 15   | 17   | 18   | 0.87     | 0.371573 | 18       | 14  | 16   | 18   | 16  | 18  | 15   | 14   | 16       | 18   | 0.98     | 0.788861  | 17       | 0.91     | 0.332929 |          |
| 260266 | At1g68510 | outative B-box zinc finger protein contain zinc finger (B-box type) lateral ornam b | 35   | 65   | 57   | 55   | 41   | 51   | 51   | 55   | 1.16     | 0.119964 | 54       | 54  | 59   | 59   | 59  | 59  | 59   | 59   | 59       | 59   | 0.56     | 0.203181  | 54       | 0.56     | 0.504630 |          |
| 260267 | At1g68530 | very-long-chain fatty acid condensing 1 very-long-chain fatty acid condensing en    | 546  | 688  | 747  | 668  | 544  | 640  | 610  | 0.6  | 0.574041 | 635      | 666      | 710 | 831  | 758  | 504 | 760 | 673  | 744  | 901      | 0.21 | 0.253230 | 728       | 0.93     | 0.006962 |          |          |
| 260268 | At1g68490 | unknown protein : supported by full-length expressed protein                        | 187  | 283  | 254  | 297  | 333  | 261  | 242  | 297  | 0.81     | 0.187622 | 210      | 237 | 248  | 338  | 262 | 249 | 255  | 235  | 231      | 268  | 0.86     | 0.220740  | 283      | 0.82     | 0.158123 |          |
| 260269 | At1g68460 | putative RNA isoenzyme interconverting 1 adenylate isoenzyme/transferase 1 / cys    | 49   | 58   | 54   | 62   | 85   | 63   | 53   | 70   | 0.76     | 0.107515 | 26       | 25  | 31   | 35   | 32  | 30  | 31   | 34   | 27       | 33   | 0.84     | 0.028833  | 33       | 0.84     | 0.079924 |          |
| 260270 | At1g68550 | putative AP2 domain transcription factor AP2 domain-containing transcription fac    | 18   | 332  | 409  | 371  | 368  | 306  | 353  | 358  | 0.99     | 0.301691 | 201      | 308 | 327  | 445  | 307 | 388 | 376  | 0.83 | 0.056271 | 385  | 0.86     | 0.126204  | 385      | 0.86     | 0.126204 |          |
| 260271 | At1g74410 | putative xylitol oxidoreductase xylitol oxidoreductase                              | 142  | 200  | 134  | 200  | 183  | 175  | 202  | 183  | 0.91     | 0.021063 | 112      | 126 | 140  | 145  | 125 | 132 | 135  | 105  | 140      | 172  | 0.74     | 0.050022  | 140      | 0.72     | 0.040022 |          |
| 260272 | At1g74440 | hypothetical protein similar to YGL010 expressed protein                            | 158  | 134  | 162  | 170  | 185  | 159  | 151  | 171  | 0.89     | 0.166543 | 111      | 127 | 133  | 150  | 107 | 106 | 149  | 139  | 124      | 130  | 2.24     | 0.0568241 | 121      | 1.02     | 0.807878 |          |
| 260273 | At1g74480 | hypothetical protein predicted by genef: RWP-RK domain-containing protein           | 46   | 54   | 65   | 37   | 33   | 39   | 55   | 36   | 1.51     | 0.037516 | 51       | 73  | 71   | 32   | 24  | 20  | 36   | 32   | 65       | 29   | 2.24     | 0.050150  | 25       | 2.55     | 0.007711 |          |
| 260274 | At1g74490 | outative protein kinase similar to protein kinase kinase, putative                  | 101  | 118  | 121  | 128  | 107  | 108  | 113  | 114  | 0.99     | 0.008106 | 91       | 95  | 120  | 125  | 89  | 84  | 106  | 98   | 102      | 100  | 1.01     | 0.008938  | 99       | 1.03     | 0.879639 |          |
| 260275 | At1g74510 | hypothetical protein similar to leishman repeat domain protein                      | 15   | 15   | 14   | 15   | 14   | 15   | 15   | 15   | 0.95     | 0.13965  | 12       | 12  | 19   | 19   | 19  | 19  | 19   | 19   | 19       | 19   | 0.94     | 0.034625  | 12       | 0.94     | 0.034625 |          |
| 260276 | At1g74530 | unknown protein                                                                     | 145  | 191  | 192  | 230  | 258  | 195  | 176  | 227  | 0.77     | 0.096746 | 176      | 218 | 231  | 337  | 231 | 233 | 215  | 207  | 208      | 244  | 0.85     | 0.326072  | 267      | 0.78     | 0.204591 |          |
| 260277 | At1g74580 | hypothetical protein contains Pfam pr pentatricopeptide (PPR) repeat-contain        | 71   | 74   | 97   | 96   | 104  | 80   | 81   | 94   | 0.86     | 0.286718 | 44       | 47  | 63   | 50   | 51  | 49  | 57   | 52   | 51       | 52   | 0.99     | 0.890743  | 50       | 1.02     | 0.849027 |          |
| 260278 | At1g74600 | hypothetical protein contains Pfam pr pentatricopeptide (PPR) repeat-contain        | 95   | 120  | 145  | 142  | 148  | 134  | 120  | 157  | 0.77     | 0.196827 | 80       | 83  | 83   | 98   | 99  | 80  | 93   | 81   | 82       | 90   | 0.91     | 0.175591  | 92       | 0.89     | 0.165107 |          |
| 260279 | At1g74620 | outative RING zinc finger protein contain zinc finger (RING-type) RING finger fa    | 19   | 13   | 18   | 20   | 13   | 18   | 20   | 13   | 0.84     | 0.192529 | 19       | 12  | 16   | 16   | 16  | 16  | 16   | 16   | 16       | 16   | 0.91     | 0.177856  | 13       | 1.04     | 0.131013 |          |
| 260280 | At1g74630 | hypothetical protein contains Pfam pr pentatricopeptide (PPR) repeat-contain        | 88   | 103  | 83   | 83   | 60   | 63   | 43   | 63   | 0.43     | 0.062400 | 39       | 40  | 40   | 37   | 37  | 37  | 37   | 37   | 37       | 37   | 0.86     | 0.075393  | 38       | 0.86     | 0.075393 |          |
| 260281 | At1g74650 | putative MYB family transcription factor myb family transcription factor (cY13)     | 11   | 13   | 12   | 12   | 15   | 16   | 12   | 14   | 0.88     | 0.275795 | 13       | 12  | 13   | 10   | 17  | 15  | 13   | 11   | 13       | 12   | 1.09     | 0.476871  | 12       | 1.10     | 0.554814 |          |
| 260282 | At1g74670 | GAST1-like protein similar to GAST1 1 gibberellin-responsive protein, putative      | 19   | 31   | 47   | 22   | 19   | 22   | 32   | 21   | 1.53     | 0.247783 | 18       | 23  | 30   | 27   | 18  | 24  | 14   | 24   | 14       | 20   | 1.19     | 0.367881  | 22       | 1.15     | 0.581818 |          |
| 260283 | At1g74680 | putative alpha galactosyltransferase GAT1 galactosyl transferase GMA1/2MNN10.1      | 19   | 171  | 201  | 279  | 282  | 237  | 144  | 266  | 0.78     | 0.189693 | 189      | 167 | 162  | 255  | 200 | 172 | 208  | 201  | 166      | 207  | 0.80     | 0.157468  | 208      | 0.80     | 0.151990 |          |
| 260284 | At1g74690 | outative exoribonuclease family protein                                             | 262  | 284  | 230  | 321  | 285  | 232  | 321  | 285  | 0.63     | 0.111783 | 239      | 232 | 239  | 232  | 239 | 232 | 239  | 232  | 239      | 232  | 0.707914 | 276       | 0.71     | 0.409092 |          |          |
| 260285 | At1g74400 | putative alpha kinase contains Pfam pr pentatricopeptide (PPR) repeat-contain       | 36   | 42   | 54   | 56   | 65   | 44   | 55   | 0.80 | 0.223571 | 35       | 35       | 33  | 45   | 35   | 33  | 37  | 37   | 34   | 37       | 0.92 | 0.340195 | 37        | 0.92     | 0.464742 |          |          |
| 260286 | At1g74590 | outative glutathione S-transferase sim glutathione S-transferase, putative          | 12   | 18   | 19   | 18   | 18   | 14   | 16   | 17   | 0.95     | 0.744729 | 22       | 24  | 23   | 13   | 13  | 9   | 17   | 13   | 23       | 13   | 1.76     | 0.000977  | 12       | 1.94     | 0.001478 |          |
| 260287 | At1g74650 | hypothetical protein predicted by genef: zinc finger homeobox family protein 1 ZF   | 267  | 35   | 45   | 37   | 52   | 45   | 36   | 45   | 0.79     | 0.258594 | 59       | 73  | 53   | 70   | 55  | 55  | 79   | 81   | 62       | 68   | 0.91     | 0.505348  | 60       | 1.03     | 0.810308 |          |
| 260288 | At1g74460 | unknown protein similar to hydroxyethyl oxidoreductase family protein               | 6027 | 6027 | 6027 | 6027 | 6027 | 6027 | 6027 | 6027 | 0.78     | 0.236550 | 201      | 195 | 202  | 202  | 202 | 202 | 202  | 202  | 202      | 202  | 0.72     | 0.210204  | 201      | 0.72     | 0.210204 |          |
| 260289 | At1g74530 | putative cytochrome P450 similar to cy cytochrome P450A, putative                   | 59   | 69   | 63   | 70   | 68   | 56   | 64   | 65   | 0.98     | 0.846398 | 46       | 42  | 46   | 41   | 43  | 42  | 45   | 41   | 45       | 42   | 1.05     | 0.189251  | 42       | 1.06     | 0.220414 |          |
| 260290 | At1g74370 | outative RING zinc finger protein contain zinc finger (CHCH4-type RING finger) fa   | 150  | 214  | 225  | 198  | 209  | 171  | 196  | 192  | 1.02     | 0.891108 | 236      | 220 | 220  | 227  | 209 | 218 | 249  | 224  | 225      | 225  | 1.00     | 0.928212  | 218      | 1.03     | 0.377220 |          |
| 260291 | At1g74400 | outative DNA-binding protein contains 1 BHLH family protein                         | 17   | 12   | 10   | 14   | 14   | 20   | 13   | 16   | 0.82     | 0.340796 | 11       | 7   | 14   | 12   | 11  | 11  | 12   | 9    | 11       | 11   | 0.99     | 0.944234  | 11       | 0.97     | 0.866217 |          |
| 260292 | At1g74500 | outative RING zinc finger protein contain zinc finger (CHCH4-type RING finger) fa   | 1437 | 1437 | 1437 | 1437 | 1437 | 1437 | 1437 | 1437 | 0.86     | 0.276190 | 237      | 238 | 238  | 238  | 238 | 238 | 238  | 238  | 238      | 238  | 0.99     | 0.779190  | 237      | 0.99     | 0.779190 |          |
| 260293 | At1g74600 | unknown protein Pfam profile: expressed protein                                     | 74   | 89   |      |      |      |      |      |      |          |          |          |     |      |      |     |     |      |      |          |      |          |           |          |          |          |          |

|             |           |                                                                                       |                                      |     |     |      |      |      |      |     |      |          |          |     |     |      |      |      |      |      |      |     |      |          |          |      |          |          |
|-------------|-----------|---------------------------------------------------------------------------------------|--------------------------------------|-----|-----|------|------|------|------|-----|------|----------|----------|-----|-----|------|------|------|------|------|------|-----|------|----------|----------|------|----------|----------|
| 260155_at   | At1g52870 | unknown protein                                                                       | peroxisomal membrane protein-related | 126 | 234 | 299  | 199  | 226  | 166  | 219 | 197  | 1.11     | 0.698534 | 211 | 255 | 221  | 287  | 218  | 234  | 222  | 208  | 229 | 234  | 0.98     | 0.836420 | 246  | 0.93     | 0.535800 |
| 260156_at   | At1g52880 | NAM-like protein similar to NAM (no ap or apical meristem (NAM) family protein        |                                      | 142 | 185 | 211  | 67   | 82   | 74   | 179 | 74   | 2.41     | 0.007154 | 132 | 158 | 178  | 159  | 128  | 123  | 132  | 129  | 156 | 133  | 1.17     | 0.137538 | 235  | 1.16     | 0.306307 |
| 260157_at   | At1g52930 | unknown protein : supported by cDNA: brix domain-containing protein                   |                                      | 512 | 599 | 611  | 737  | 678  | 609  | 574 | 674  | 0.85     | 0.108016 | 521 | 554 | 579  | 835  | 622  | 614  | 596  | 577  | 562 | 649  | 0.85     | 0.178910 | 690  | 0.80     | 0.133897 |
| 260158_at   | At1g79810 | putative RNA-binding protein                                                          |                                      | 20  | 20  | 20   | 36   | 32   | 22   | 23  | 23   | 0.98     | 0.873321 | 15  | 15  | 17   | 16   | 15   | 13   | 12   | 15   | 12  | 15   | 1.05     | 0.076133 | 15   | 1.05     | 0.146820 |
| 260159_at   | At1g79890 | putative helicase similar to helicase GB helicase-related, // expressed protein       |                                      | 72  | 98  | 102  | 104  | 107  | 99   | 90  | 103  | 0.87     | 0.258269 | 59  | 53  | 72   | 82   | 68   | 63   | 63   | 61   | 62  | 67   | 0.91     | 0.395827 | 71   | 0.87     | 0.290012 |
| 260160_at   | At1g79880 | putative RNA-binding protein contains L domain-containing protein                     |                                      | 184 | 278 | 305  | 250  | 275  | 227  | 256 | 251  | 1.02     | 0.903407 | 243 | 227 | 239  | 322  | 244  | 256  | 280  | 279  | 236 | 276  | 0.86     | 0.071205 | 274  | 0.86     | 0.204464 |
| 260161_at   | At1g79860 | hypothetical protein similar to putative L expressed protein                          |                                      | 24  | 17  | 21   | 18   | 15   | 15   | 21  | 16   | 1.28     | 0.127920 | 8   | 42  | 15   | 12   | 15   | 11   | 32   | 13   | 22  | 17   | 1.30     | 0.998679 | 13   | 1.71     | 0.431106 |
| 260162_at   | At1g79830 | putative RNA-binding protein                                                          |                                      | 403 | 549 | 539  | 586  | 593  | 443  | 457 | 498  | 0.86     | 0.156333 | 448 | 473 | 509  | 465  | 450  | 427  | 511  | 487  | 451 | 589  | 0.85     | 0.138979 | 497  | 0.80     | 0.330595 |
| 260163_at   | At1g79900 | putative carnitine/acetylcholine transloc mitochondrial substrate carrier family or   |                                      | 57  | 77  | 100  | 88   | 99   | 82   | 78  | 90   | 0.86     | 0.419004 | 89  | 86  | 90   | 119  | 102  | 95   | 104  | 110  | 89  | 106  | 0.84     | 0.016534 | 106  | 0.84     | 0.073305 |
| 260164_at   | At1g79870 | outative D-isomer specific 2-hydroxyacid oxidoreductase family protein                |                                      | 463 | 557 | 555  | 777  | 820  | 655  | 725 | 751  | 0.70     | 0.017867 | 598 | 689 | 669  | 1062 | 762  | 737  | 724  | 719  | 652 | 801  | 0.81     | 0.148449 | 854  | 0.76     | 0.134922 |
| 260165_at   | At1g79850 | 30S ribosomal protein S17, chloroplasts 30S ribosomal protein S17, chloroplast        |                                      | 454 | 735 | 549  | 634  | 759  | 522  | 579 | 639  | 0.91     | 0.610329 | 872 | 930 | 823  | 1109 | 972  | 904  | 1021 | 934  | 875 | 988  | 0.89     | 0.077280 | 995  | 0.88     | 0.151287 |
| 260166_at   | At1g79840 | homobox protein (GLABRA2) identical homobox-leucine zipper protein 10 HE              |                                      | 25  | 28  | 30   | 36   | 32   | 29   | 32  | 29   | 0.37     | 0.013321 | 73  | 56  | 79   | 58   | 53   | 48   | 73   | 70   | 69  | 50   | 1.14     | 0.316323 | 95   | 1.30     | 0.085603 |
| 260167_at   | At1g71970 | hypothetical protein predicted by cense expressed protein                             |                                      | 241 | 316 | 318  | 454  | 418  | 385  | 292 | 412  | 0.71     | 0.023200 | 381 | 431 | 440  | 713  | 481  | 467  | 551  | 544  | 417 | 551  | 0.76     | 0.068189 | 554  | 0.75     | 0.170084 |
| 260168_at   | At1g71980 | unknown protein contains zinc finger, ( protease-associated zinc finger (C3HC4        |                                      | 201 | 282 | 284  | 231  | 278  | 193  | 256 | 234  | 1.09     | 0.587860 | 184 | 187 | 176  | 236  | 220  | 208  | 233  | 220  | 182 | 223  | 0.82     | 0.001279 | 221  | 0.82     | 0.011848 |
| 260169_at   | At1g71990 | hypothetical protein predicted by gene alpha-(1,4)-fucosyltransferase / galactos      |                                      | 181 | 241 | 245  | 303  | 361  | 278  | 222 | 314  | 0.71     | 0.047246 | 222 | 227 | 230  | 359  | 285  | 252  | 300  | 293  | 226 | 298  | 0.76     | 0.022254 | 299  | 0.76     | 0.086030 |
| 260170_at   | At1g71890 | putative sucrose transport protein simili sucrose transporter / sucrose-transport svr |                                      | 785 | 975 | 693  | 611  | 428  | 636  | 481 | 558  | 0.86     | 0.586400 | 715 | 770 | 870  | 845  | 700  | 576  | 775  | 781  | 818 | 736  | 1.11     | 0.358909 | 707  | 1.16     | 0.368341 |
| 260171_at   | At1g71910 | hypothetical protein predicted by cense expressed protein                             |                                      | 90  | 112 | 120  | 90   | 85   | 90   | 104 | 88   | 1.17     | 0.236584 | 70  | 85  | 82   | 88   | 65   | 68   | 77   | 72   | 79  | 74   | 1.07     | 0.432623 | 74   | 1.08     | 0.546876 |
| 260172_s_at | At1g71920 | putative histidinol-choshate aminotran histidinol-choshate aminotransferase, t        |                                      | 374 | 990 | 982  | 988  | 1124 | 907  | 918 | 1007 | 0.91     | 0.394138 | 698 | 596 | 685  | 807  | 810  | 687  | 794  | 805  | 660 | 781  | 0.85     | 0.021776 | 768  | 0.86     | 0.105042 |
| 260173_at   | At1g71930 | NAM-like protein similar to NAM GB-Cf no apical meristem (NAM) family protein         |                                      | 27  | 34  | 35   | 37   | 36   | 40   | 32  | 38   | 0.85     | 0.097153 | 31  | 34  | 32   | 36   | 27   | 30   | 39   | 35   | 32  | 33   | 0.97     | 0.767854 | 31   | 1.05     | 0.588116 |
| 260174_at   | At1g71940 | unknown protein : supported by full-length expressed protein                          |                                      | 137 | 156 | 176  | 172  | 177  | 150  | 157 | 166  | 0.94     | 0.519049 | 150 | 154 | 154  | 205  | 171  | 158  | 158  | 155  | 153 | 169  | 0.80     | 0.226508 | 178  | 0.86     | 0.143999 |
| 260175_at   | At1g72000 | neutral invertase, putative similar to ne beta-fructofuranosidase, putative / invert  |                                      | 33  | 43  | 53   | 41   | 44   | 41   | 43  | 42   | 1.02     | 0.915187 | 26  | 30  | 34   | 31   | 26   | 24   | 33   | 27   | 30  | 28   | 1.07     | 0.510671 | 27   | 1.11     | 0.374278 |
| 260176_at   | At1g71950 | unknown protein similar to PI starvation expressed protein                            |                                      | 832 | 911 | 1020 | 1165 | 1248 | 1018 | 921 | 1144 | 0.81     | 0.061722 | 883 | 986 | 1007 | 1470 | 1120 | 1080 | 1186 | 1116 | 959 | 1194 | 0.80     | 0.054225 | 1223 | 0.78     | 0.111127 |
| 260142_at   | At1g71900 | unknown protein : supported by cDNA: expressed protein                                |                                      | 174 | 219 | 247  | 274  | 282  | 228  | 213 | 261  | 0.82     | 0.150008 | 142 | 145 | 151  | 234  | 191  | 169  | 187  | 168  | 146 | 190  | 0.77     | 0.032723 | 198  | 0.74     | 0.052138 |
| 260143_at   | At1g71880 | sucrose transport protein SUC1 identical sucrose transporter / sucrose-transport svr  |                                      | 57  | 71  | 56   | 60   | 68   | 93   | 61  | 74   | 0.83     | 0.315941 | 20  | 24  | 28   | 31   | 24   | 31   | 35   | 31   | 24  | 30   | 0.80     | 0.058515 | 29   | 0.84     | 0.214769 |
| 260144_at   | At1g71960 | putative ABC transporter similar to bres ABC transporter-family protein               |                                      | 49  | 57  | 1    | 76   | 63   | 59   | 73  | 80   | 0.159576 | 65       | 71  | 78  | 80   | 63   | 50   | 61   | 61   | 71   | 63  | 1.13 | 0.227180 | 64       | 1.11 | 0.496968 |          |
| 260145_at   | At1g53880 | AtG1-like protein similar to AtG1 protei avirulence-responsive family protein / av    |                                      | 26  | 35  | 44   | 48   | 51   | 49   | 35  | 49   | 0.71     | 0.056600 | 21  | 22  | 29   | 33   | 24   | 25   | 30   | 29   | 24  | 28   | 0.85     | 0.179496 | 27   | 0.88     | 0.447407 |
| 260115_at   | At1g33870 | AtG1-like protein similar to AtG1 protei avirulence-responsive protein, putative /    |                                      | 13  | 17  | 18   | 24   | 25   | 31   | 16  | 27   | 0.60     | 0.019177 | 12  | 15  | 16   | 23   | 11   | 15   | 23   | 18   | 14  | 18   | 0.79     | 0.265181 | 16   | 0.86     | 0.574155 |
| 260116_at   | At1g33960 | AtG1 identical to AtG1 (exhibits RPS2- avirulence-responsive protein / avirulenc      |                                      | 12  | 13  | 15   | 12   | 14   | 15   | 13  | 14   | 0.97     | 0.821261 | 10  | 11  | 14   | 10   | 12   | 13   | 12   | 16   | 12  | 12   | 0.94     | 0.622329 | 12   | 1.00     | 0.986215 |
| 260117_at   | At1g33950 | AtG1-like protein similar to AtG1 protei avirulence-responsive family protein / av    |                                      | 25  | 34  | 40   | 40   | 37   | 31   | 39  | 30   | 0.81     | 0.089705 | 22  | 20  | 36   | 31   | 21   | 31   | 30   | 31   | 26  | 29   | 0.90     | 0.543702 | 27   | 0.94     | 0.804400 |
| 260118_s_at | At1g33940 | hypothetical protein predicted by cense expressed protein                             |                                      | 26  | 34  | 287  | 349  | 255  | 246  | 350 | 0.86 | 0.161570 | 233      | 228 | 242 | 306  | 273  | 245  | 263  | 291  | 468  | 112 | 270  | 0.87     | 0.061502 | 270  | 0.87     | 0.061502 |
| 260119_at   | At1g33930 | AtG1-like protein similar to AtG1 protei avirulence-responsive family protein / av    |                                      | 10  | 18  | 17   | 16   | 20   | 22   | 15  | 19   | 0.80     | 0.264090 | 10  | 14  | 14   | 15   | 14   | 10   | 14   | 12   | 12  | 13   | 0.96     | 0.757546 | 13   | 0.96     | 0.798342 |
| 260120_at   | At1g33920 | hypothetical protein                                                                  | lectin-related                       | 46  | 44  | 67   | 51   | 54   | 52   | 52  | 52   | 1.00     | 0.981855 | 40  | 51  | 51   | 47   | 44   | 42   | 48   | 44   | 47  | 45   | 1.06     | 0.422282 | 44   | 1.07     | 0.431966 |
| 260121_at   | At1g33910 | AtG1-like protein similar to AtG1 protei avirulence-responsive family protein / av    |                                      | 39  | 33  | 45   | 30   | 36   | 37   | 39  | 34   | 1.14     | 0.298871 | 29  | 25  | 34   | 26   | 24   | 25   | 24   | 24   | 29  | 24   | 1.19     | 0.624777 | 25   | 1.17     | 0.201038 |
| 260122_at   | At1g33900 | AtG1-like protein similar to AtG1 protei avirulence-responsive protein, outative /    |                                      | 15  | 17  | 16   | 19   | 22   | 19   | 16  | 20   | 0.80     | 0.038144 | 14  | 14  | 17   | 19   | 20   | 17   | 20   | 17   | 15  | 19   | 0.80     | 0.071623 | 19   | 0.80     | 0.049467 |
| 260123_at   | At1g33890 | AtG1-like protein similar to AtG1 protei avirulence-responsive protein, outative /    |                                      | 13  | 17  | 24   | 23   | 20   | 18   | 20  | 18   | 0.88     | 0.532430 | 14  | 12  | 18   | 18   | 15   | 15   | 19   | 14   | 15  | 16   | 0.91     | 0.388355 | 16   | 0.92     | 0.571736 |
| 260124_at   | At1g36340 | E2 ubiquitin-conjugatino enzme. outi ubiquitin-conjugatino enzme famly orot           |                                      | 443 | 628 | 682  | 37   | 38   | 39   | 584 | 38   | 15.31    | 0.001661 | 445 | 422 | 534  | 31   | 35   | 39   | 36   | 29   | 467 | 34   | 13.81    | 0.000002 | 35   | 13.41    | 0.000020 |
| 260125_at   | At1g36390 | putative heat shock protein similar to G co-chaperone gpE family protein              |                                      | 144 | 187 | 181  | 202  | 206  | 173  | 171 | 194  | 0.88     | 0.255481 | 151 | 176 | 165  | 265  | 176  | 172  | 219  | 213  | 164 | 209  | 0.78     | 0.098659 | 204  | 0.80     | 0.263684 |
| 260126_at   | At1g36370 | putative hydroxyl transferase simi glycine hydroxymethyltransferase, putati           |                                      | 377 | 258 | 277  | 317  | 300  | 293  | 301 | 323  | 0.93     | 0.659097 | 279 | 302 | 147  | 173  | 165  | 124  | 153  | 159  | 30  | 157  | 1.00     | 0.517691 | 154  | 1.00     | 0.974898 |
| 260127_at   | At1g36320 | hypothetical protein similar to hypotet expressed protein                             |                                      | 211 | 316 | 323  | 332  | 364  | 286  | 283 | 327  | 0.87     | 0.360608 | 309 | 295 | 307  | 418  | 375  | 331  | 356  | 339  | 304 | 364  | 0.84     | 0.029429 | 375  | 0.81     | 0.051406 |
| 260128_at   | At1g36310 | hypothetical protein similar to YnmD14w expressed protein                             |                                      | 249 | 422 | 431  | 509  | 528  | 424  | 401 | 487  | 0.82     | 0.103527 | 351 | 339 | 367  | 568  | 437  | 418  | 425  | 421  | 352 | 454  | 0.78     | 0.039468 | 474  | 0.74     | 0.063170 |
| 260129_at   | At1g36380 | hypothetical protein similar to YnmD14w expressed protein                             |                                      | 252 | 335 | 366  | 417  | 404  | 333  | 318 | 385  | 0.83     | 0.192268 | 342 | 339 | 390  | 552  | 398  | 369  | 368  | 347  | 357 | 413  | 0.87     | 0.306613 | 450  | 0.79     | 0.161133 |
| 260130_s_at | At1g6280  | beta-glucosidase, outative similar to G beta-glucosidase (PSR3.21 // alcovsel h       |                                      | 10  | 15  | 4    | 5    | 4    | 4    | 11  | 4    | 2.58     | 0.035248 | 6   | 4   | 5    | 8    | 3    | 7    | 5    | 7    | 6   | 6    | 1.04     | 0.846050 | 6    | 0.98     | 0.626272 |
| 260131_at   | At1g65310 | Atkron protein contains Pfam protein                                                  |                                      | 25  | 29  | 30   | 38   | 35   | 32   | 28  | 35   | 0.80     | 0.045786 | 27  | 24  | 28   | 31   | 36   | 32   | 27   | 31   | 34  | 30   | 0.87     | 0.167759 | 31   | 0.89     | 0.329168 |
| 260132_s_at | At1g6640  | hypothetical protein                                                                  | F-box family protein                 | 19  | 23  | 22   | 21   | 26   | 22   | 21  | 23   | 0.92     | 0.445100 | 19  | 22  | 22   | 18   | 17   | 18   | 21   | 20   | 21  | 19   | 1.12     | 0.085764 | 18   | 1.18     | 0.030377 |
| 260133_at   | At1g66340 | ethylene-response protein, ETR1 identical ethylene receptor 1 (ETR1)                  |                                      | 230 | 320 | 320  | 362  | 419  | 333  | 290 | 371  | 0.78     | 0.108456 | 242 | 225 | 249  | 350  | 272  | 238  | 303  | 275  | 239 | 288  | 0.83     | 0.104310 | 287  | 0.83     | 0.230825 |
| 260134_at   | At1g66370 | Mv-related transfection factor, outati mvb family transfection factor (MYB113         |                                      | 50  | 66  | 68   | 68   | 68   | 53   | 61  | 63   | 0.97     | 0.818348 | 55  | 60  | 64   | 71   | 59   | 61   | 71   | 59   | 60  | 64   | 0.93     | 0.309871 | 64   | 0.94     | 0.422164 |
| 260135_at   | At1g6640  | calmodulin-related protein similar to G calmodulin-related protein, putative          |                                      | 162 | 162 | 217  | 244  | 265  | 191  | 180 | 244  | 0.68     | 0.049408 | 151 | 167 | 145  | 148  | 168  | 133  | 167  | 153  | 145 | 167  | 1.00     | 0.472839 |      |          |          |

|           |           |                                                                                          |     |     |      |      |      |      |      |      |      |          |      |      |      |      |      |      |      |      |      |      |      |          |      |      |          |
|-----------|-----------|------------------------------------------------------------------------------------------|-----|-----|------|------|------|------|------|------|------|----------|------|------|------|------|------|------|------|------|------|------|------|----------|------|------|----------|
| 260061_at | At1g73690 | cell division protein kinase similar to cœ cell division protein kinase, putative        | 34  | 38  | 36   | 40   | 45   | 40   | 36   | 41   | 0.87 | 0.056180 | 34   | 30   | 39   | 40   | 36   | 29   | 34   | 31   | 34   | 34   | 1.00 | 0.984062 | 35   | 0.97 | 0.824488 |
| 260062_at | At1g73710 | hyothetical protein contains Pfam ror pentatricopeptide (PPR) repeat-contains            | 74  | 102 | 110  | 115  | 126  | 95   | 95   | 112  | 0.85 | 0.306607 | 75   | 68   | 79   | 95   | 85   | 69   | 91   | 84   | 74   | 85   | 0.87 | 0.136563 | 83   | 0.89 | 0.332203 |
| 260063_at | At1g73720 | unknown protein contains Pfam ror transducin family protein / WD-40 repeat               | 292 | 332 | 318  | 327  | 363  | 289  | 300  | 326  | 0.92 | 0.472020 | 240  | 272  | 283  | 407  | 320  | 278  | 344  | 322  | 265  | 334  | 0.79 | 0.057184 | 335  | 0.79 | 0.153177 |
| 260064_at | At1g73750 | chitinase-like protein (ELI3) idem chitinase-insect-like3 (ELI3)                         | 150 | 170 | 181  | 176  | 185  | 140  | 175  | 186  | 0.86 | 0.137453 | 138  | 130  | 147  | 156  | 152  | 136  | 152  | 140  | 155  | 140  | 0.87 | 0.034637 | 150  | 0.87 | 0.158173 |
| 260065_at | At1g73760 | outative RING zinc finger protein conta zinc finger (C3HC4-type RING finger) fa          | 359 | 445 | 580  | 602  | 623  | 517  | 508  | 581  | 0.87 | 0.316247 | 399  | 485  | 447  | 637  | 459  | 421  | 514  | 544  | 443  | 515  | 0.86 | 0.224665 | 506  | 0.88 | 0.431388 |
| 260066_at | At1g73610 | putative lipase/acyldiolase contains I GDSL-motif lipase/hydrolase family prot           | 50  | 60  | 97   | 23   | 26   | 22   | 69   | 24   | 2.90 | 0.035163 | 159  | 198  | 133  | 20   | 15   | 21   | 27   | 20   | 163  | 20   | 7.98 | 0.000056 | 19   | 8.82 | 0.001656 |
| 260067_at | At1g73780 | putative lipid transfer protein similar to i protease inhibitor/seeded storage/lipid tra | 9   | 13  | 18   | 22   | 17   | 15   | 13   | 18   | 0.74 | 0.232027 | 13   | 15   | 15   | 12   | 12   | 17   | 17   | 15   | 14   | 14   | 0.99 | 0.939447 | 14   | 1.05 | 0.697356 |
| 260068_at | At1g73805 | putative calmodulin-binding protein sim calmodulin-binding protein                       | 18  | 17  | 21   | 24   | 26   | 18   | 17   | 21   | 0.81 | 0.072043 | 12   | 13   | 15   | 13   | 15   | 13   | 15   | 13   | 15   | 13   | 0.95 | 0.805128 | 14   | 0.95 | 0.609092 |
| 260069_at | At1g73820 | unknown protein                                                                          | 289 | 392 | 425  | 303  | 441  | 356  | 368  | 397  | 0.93 | 0.580751 | 409  | 435  | 442  | 602  | 440  | 443  | 455  | 419  | 429  | 472  | 0.91 | 0.372982 | 495  | 0.87 | 0.289323 |
| 260070_at | At1g73830 | outative helix-loop-helix DNA-binding o basic helix-loop-helix (bHLH) family vrot        | 28  | 34  | 38   | 41   | 40   | 38   | 33   | 40   | 0.83 | 0.104058 | 28   | 32   | 31   | 37   | 32   | 29   | 33   | 28   | 30   | 32   | 0.96 | 0.582732 | 33   | 0.93 | 0.455339 |
| 260071_at | At1g73840 | unknown oroline-rich protein precursor s hydroxycoroline-rich olvoconerin family c       | 205 | 267 | 268  | 278  | 324  | 243  | 247  | 282  | 0.88 | 0.325317 | 260  | 275  | 295  | 364  | 304  | 292  | 282  | 263  | 277  | 301  | 0.92 | 0.346385 | 320  | 0.86 | 0.148994 |
| 260072_at | At1g73650 | unknown protein suported by cDNA. C expressed protein                                    | 134 | 189 | 191  | 197  | 215  | 174  | 168  | 195  | 0.86 | 0.266583 | 206  | 234  | 230  | 350  | 253  | 245  | 242  | 240  | 223  | 266  | 0.94 | 0.191656 | 283  | 0.79 | 0.164880 |
| 260073_at | At1g73660 | putative protein kinase contains Pfam c protein kinase family protein                    | 217 | 211 | 227  | 198  | 157  | 137  | 198  | 206  | 0.85 | 0.072432 | 167  | 137  | 165  | 242  | 209  | 166  | 200  | 193  | 156  | 202  | 0.77 | 0.045337 | 206  | 0.76 | 0.108918 |
| 260074_at | At1g73640 | putative ras-related GTP-binding protei Ras-related GTP-binding family protein           | 73  | 80  | 83   | 90   | 89   | 82   | 79   | 87   | 0.90 | 0.110074 | 85   | 76   | 88   | 84   | 74   | 90   | 90   | 82   | 83   | 84   | 0.99 | 0.804148 | 83   | 1.00 | 0.973483 |
| 260075_at | At1g73700 | putative intral membrane protein con MATE efflux family protein                          | 65  | 71  | 93   | 83   | 73   | 79   | 77   | 78   | 0.98 | 0.863032 | 61   | 61   | 79   | 78   | 57   | 54   | 86   | 72   | 67   | 70   | 0.96 | 0.784659 | 63   | 1.06 | 0.715587 |
| 260076_at | At1g73630 | outative calmodulin similar to calmoduli calcium-binding protein, putative               | 48  | 62  | 65   | 57   | 63   | 55   | 58   | 55   | 1.06 | 0.595899 | 53   | 65   | 69   | 89   | 65   | 64   | 65   | 60   | 59   | 69   | 0.86 | 0.257290 | 73   | 0.81 | 0.216155 |
| 260077_at | At1g73620 | thauatin-like protein contains Pfam or thauatin-like protein, outative / oathox          | 963 | 996 | 1104 | 1437 | 1567 | 1422 | 1021 | 1475 | 0.69 | 0.001946 | 1540 | 1669 | 1648 | 2640 | 1966 | 1883 | 1963 | 1892 | 1619 | 2073 | 0.78 | 0.056925 | 2163 | 0.75 | 0.088708 |
| 260078_at | At1g73790 | hyothetical protein predicted by œnef expressed protein                                  | 242 | 325 | 343  | 362  | 395  | 339  | 304  | 365  | 0.83 | 0.153164 | 263  | 281  | 315  | 472  | 371  | 322  | 323  | 322  | 286  | 362  | 0.79 | 0.108655 | 389  | 0.74 | 0.094165 |
| 260044_at | At1g73655 | Expressed protein ; supported by full-le immunophilin / FKBP-type peptidyl-proly         | 171 | 310 | 331  | 264  | 298  | 225  | 271  | 262  | 1.03 | 0.881878 | 245  | 301  | 268  | 388  | 267  | 294  | 372  | 336  | 272  | 332  | 0.82 | 0.115110 | 317  | 0.86 | 0.323692 |
| 260045_at | At1g73670 | putative MAP kinase similar to mibosen mtocon-activated protein kinase, putati           | 83  | 101 | 95   | 114  | 113  | 90   | 93   | 106  | 0.88 | 0.253137 | 47   | 47   | 53   | 65   | 52   | 52   | 51   | 51   | 49   | 54   | 0.91 | 0.252124 | 56   | 0.88 | 0.224835 |
| 260046_at | At1g73800 | Expressed protein ; supported by cDNA calmodulin-binding protein                         | 25  | 30  | 34   | 38   | 41   | 41   | 30   | 40   | 0.74 | 0.017688 | 25   | 20   | 34   | 26   | 25   | 23   | 29   | 27   | 26   | 25   | 1.04 | 0.788364 | 24   | 1.12 | 0.553309 |
| 260047_at | At1g73740 | outative UDP-N-acetylglucosamine-N- glycosyl transferase family 28 protein               | 82  | 125 | 126  | 148  | 200  | 125  | 111  | 157  | 0.70 | 0.153605 | 101  | 95   | 97   | 129  | 118  | 115  | 122  | 121  | 98   | 121  | 0.81 | 0.000573 | 121  | 0.81 | 0.008658 |
| 260048_at | At1g73750 | unknown protein contains Pfam rorle: expressed protein                                   | 47  | 51  | 69   | 57   | 64   | 53   | 56   | 58   | 0.96 | 0.789792 | 65   | 71   | 63   | 66   | 82   | 69   | 82   | 61   | 67   | 76   | 0.88 | 0.107093 | 72   | 0.92 | 0.349039 |
| 260049_at | At1g29040 | DNA-directed RNA polymerase subunit DNA-directed RNA polymerase family or                | 285 | 382 | 339  | 381  | 443  | 323  | 335  | 382  | 0.88 | 0.351081 | 308  | 232  | 293  | 335  | 321  | 288  | 313  | 314  | 278  | 314  | 0.88 | 0.116643 | 315  | 0.88 | 0.245796 |
| 260050_at | At1g29960 | hyothetical protein predicted by œnef alonal peptidase i family protein / MADOS          | 26  | 34  | 41   | 39   | 53   | 33   | 34   | 42   | 0.81 | 0.343625 | 23   | 30   | 29   | 43   | 28   | 28   | 32   | 32   | 27   | 33   | 0.84 | 0.235186 | 33   | 0.82 | 0.342804 |
| 260020_at | At1g29990 | hydrophilic protein, putative similar to i prefolitin, putative                          | 411 | 582 | 546  | 633  | 742  | 543  | 505  | 639  | 0.79 | 0.145852 | 449  | 551  | 494  | 719  | 530  | 536  | 552  | 547  | 498  | 577  | 0.86 | 0.181932 | 595  | 0.84 | 0.230037 |
| 260021_at | At1g30010 | unknown protein                                                                          | 58  | 73  | 84   | 85   | 93   | 77   | 72   | 85   | 0.85 | 0.217637 | 38   | 32   | 42   | 45   | 38   | 38   | 36   | 40   | 37   | 39   | 0.95 | 0.492143 | 40   | 0.92 | 0.440963 |
| 260022_at | At1g30020 | unknown protein                                                                          | 21  | 29  | 27   | 27   | 23   | 28   | 26   | 26   | 1.00 | 0.995748 | 25   | 23   | 25   | 19   | 25   | 22   | 20   | 24   | 24   | 22   | 1.09 | 0.214201 | 22   | 1.09 | 0.329169 |
| 260023_at | At1g30040 | unknown protein                                                                          | 275 | 299 | 549  | 353  | 331  | 239  | 374  | 308  | 1.22 | 0.520875 | 753  | 962  | 567  | 967  | 774  | 800  | 1173 | 1177 | 761  | 978  | 0.78 | 0.178713 | 847  | 0.90 | 0.541444 |
| 260024_at | At1g30080 | outative 3-oxoacylase, outative glyoxylate hydratase family 17 protein                   | 23  | 24  | 33   | 27   | 32   | 30   | 27   | 34   | 0.72 | 0.102405 | 19   | 21   | 16   | 19   | 21   | 23   | 23   | 23   | 23   | 23   | 0.83 | 0.051002 | 26   | 0.93 | 0.091348 |
| 260025_at | At1g30070 | unknown protein ; supported by full-lecns oligosaccharide mannose-containing protein     | 303 | 393 | 515  | 491  | 837  | 473  | 337  | 600  | 0.56 | 0.069566 | 367  | 396  | 469  | 645  | 446  | 407  | 406  | 410  | 480  | 406  | 0.86 | 0.314171 | 529  | 0.78 | 0.152132 |
| 260026_at | At1g29970 | 60S ribosomal protein L18A, putative s expressed protein                                 | 297 | 444 | 532  | 378  | 433  | 331  | 418  | 380  | 1.10 | 0.667585 | 360  | 388  | 354  | 471  | 389  | 396  | 436  | 391  | 368  | 417  | 0.88 | 0.075823 | 419  | 0.88 | 0.145382 |
| 260027_at | At1g29950 | unknown protein                                                                          | 177 | 244 | 234  | 263  | 295  | 244  | 225  | 267  | 0.84 | 0.111302 | 125  | 125  | 145  | 215  | 190  | 163  | 176  | 167  | 132  | 182  | 0.72 | 0.009564 | 189  | 0.69 | 0.024255 |
| 260028_at | At1g29960 | unitative protein, supported by cDNA: expressed protein                                  | 655 | 554 | 555  | 815  | 828  | 562  | 589  | 798  | 0.74 | 0.006687 | 620  | 540  | 575  | 754  | 620  | 554  | 625  | 545  | 635  | 654  | 0.85 | 0.090953 | 634  | 0.85 | 0.211328 |
| 260029_at | At1g30000 | endoplasmic reticulum alpha-mannosid glycoside hydrolase family 47 protein               | 111 | 138 | 143  | 138  | 147  | 118  | 137  | 134  | 0.97 | 0.791383 | 91   | 82   | 99   | 96   | 83   | 79   | 86   | 83   | 91   | 85   | 1.06 | 0.331682 | 86   | 1.06 | 0.522159 |
| 260030_at | At1g68880 | outative bZIP transcription factor simila bZIP transcription factor family protein       | 32  | 34  | 45   | 45   | 42   | 36   | 37   | 41   | 0.90 | 0.442802 | 24   | 26   | 29   | 28   | 20   | 25   | 26   | 31   | 26   | 26   | 1.03 | 0.811876 | 24   | 1.09 | 0.460454 |
| 260031_at | At1g68790 | putative nuclear matrix constituent prot expressed protein                               | 224 | 271 | 242  | 290  | 307  | 268  | 246  | 288  | 0.85 | 0.075545 | 182  | 150  | 197  | 260  | 226  | 165  | 243  | 220  | 176  | 223  | 0.79 | 0.098515 | 217  | 0.81 | 0.263166 |
| 260032_at | At1g68750 | putative phosphoenolpyruvate carboxyl phosphoenolpyruvate carboxylase fami               | 45  | 61  | 65   | 73   | 71   | 69   | 57   | 71   | 0.80 | 0.437378 | 35   | 30   | 40   | 46   | 32   | 37   | 38   | 37   | 38   | 38   | 0.91 | 0.968838 | 38   | 0.97 | 0.076642 |
| 260033_at | At1g68760 | putative muT protein contains Pfam pi MuT/nudix family protein                           | 142 | 138 | 159  | 217  | 208  | 207  | 146  | 211  | 0.69 | 0.005099 | 141  | 154  | 162  | 274  | 232  | 212  | 202  | 199  | 152  | 224  | 0.68 | 0.009159 | 239  | 0.64 | 0.010779 |
| 260034_at | At1g68810 | outative DNA-binding protein Pfam HM basic helix-loop-helix (bHLH) family vrot           | 99  | 118 | 115  | 113  | 139  | 113  | 111  | 122  | 0.91 | 0.355282 | 67   | 62   | 91   | 112  | 85   | 75   | 77   | 65   | 73   | 83   | 0.88 | 0.471349 | 91   | 0.81 | 0.280647 |
| 260035_at | At1g68850 | peroxidase AT1P23a identical to peroxid peroxidase, putative                             | 24  | 28  | 30   | 26   | 34   | 28   | 28   | 28   | 0.99 | 0.647023 | 22   | 20   | 22   | 23   | 22   | 18   | 26   | 20   | 21   | 22   | 0.98 | 0.791709 | 21   | 1.01 | 0.882972 |
| 260036_at | At1g68830 | outative protein kinase Pfam HM htk i protein kinase family protein                      | 95  | 125 | 133  | 147  | 141  | 111  | 118  | 133  | 0.86 | 0.388648 | 110  | 110  | 133  | 195  | 140  | 118  | 130  | 128  | 142  | 132  | 0.82 | 0.251223 | 151  | 0.77 | 0.250460 |
| 260037_at | At1g68840 | putative DNA-binding protein (RAV2)-lik DNA-binding protein RAV2 (RAV2) / AP             | 82  | 95  | 83   | 91   | 101  | 84   | 92   | 92   | 0.82 | 0.471490 | 88   | 59   | 69   | 61   | 61   | 67   | 61   | 67   | 61   | 67   | 0.85 | 0.071637 | 61   | 0.85 | 0.346804 |
| 260038_at | At1g68875 | Expressed protein ; supported by full-le expressed protein                               | 16  | 30  | 28   | 29   | 31   | 28   | 25   | 29   | 0.84 | 0.339390 | 22   | 23   | 24   | 25   | 20   | 16   | 27   | 25   | 23   | 23   | 1.03 | 0.804101 | 20   | 1.15 | 0.320441 |
| 260039_at | At1g68795 | CLE12 CLAVATA3/ESR-related 12; s CLE12                                                   | 21  | 26  | 38   | 33   | 30   | 29   | 29   | 30   | 1.04 | 0.751665 | 21   | 26   | 22   | 28   | 25   | 23   | 21   | 22   | 23   | 26   | 0.89 | 0.287806 | 25   | 0.90 | 0.308659 |
| 260040_at | At1g68765 | Expressed protein ; supported by full-le expressed protein                               | 28  | 27  | 37   | 37   | 36   | 28   | 31   | 30   | 1.01 | 0.924442 | 23   | 27   | 27   | 25   | 20   | 22   | 23   | 25   | 23   | 25   | 1.11 | 0.157570 | 22   | 1.14 | 0.199882 |
| 260041_at | At1g68780 | unknown protein similar to hvothetical leucine-rich repeat family protein                | 76  | 108 | 66   | 226  | 190  | 83   | 222  | 77   | 0.92 | 0.588787 | 67   | 63   | 69   | 60   | 137  | 136  | 101  | 109  | 60   | 108  | 0.96 | 0.063308 | 148  | 0.92 | 0.032158 |
| 260042_at | At1g68820 | hyothetical protein C-term similar to C membrane protein, putative                       | 120 | 177 | 179  | 182  | 212  | 152  | 159  | 182  | 0.87 | 0.423141 | 159  | 151  | 152  | 219  | 173  | 15   |      |      |      |      |      |          |      |      |          |

|             |           |                                                                                          |     |     |     |     |     |     |     |      |          |          |     |     |     |      |     |     |     |     |     |     |          |          |      |          |          |
|-------------|-----------|------------------------------------------------------------------------------------------|-----|-----|-----|-----|-----|-----|-----|------|----------|----------|-----|-----|-----|------|-----|-----|-----|-----|-----|-----|----------|----------|------|----------|----------|
| 259974_at   | A1tg76430 | putative phosphate transporter similar t phosphate transporter family protein            | 34  | 36  | 56  | 49  | 51  | 52  | 42  | 51   | 0.83     | 0.297448 | 31  | 42  | 51  | 36   | 37  | 39  | 35  | 40  | 42  | 38  | 1.11     | 0.392119 | 37   | 1.12     | 0.499042 |
| 259975_at   | A1tg76470 | putative cinnamoyl-CoA reductase sim cinnamoyl-CoA reductase family                      | 34  | 36  | 67  | 56  | 52  | 70  | 46  | 59   | 0.78     | 0.330033 | 31  | 30  | 46  | 46   | 29  | 30  | 39  | 42  | 35  | 37  | 0.95     | 0.769075 | 35   | 1.01     | 0.958407 |
| 259976_at   | A1tg76560 | hydroethanol protein : supported by full- CP12 domain-containing protein                 | 60  | 108 | 99  | 53  | 54  | 53  | 89  | 53   | 1.68     | 0.072929 | 73  | 86  | 68  | 62   | 63  | 61  | 70  | 67  | 76  | 61  | 1.25     | 0.091078 | 55   | 1.37     | 0.066138 |
| 259977_at   | A1tg76590 | unknown protein : supported by full-len family protein                                   | 31  | 30  | 51  | 51  | 51  | 48  | 43  | 1.13 | 0.817639 | 51       | 80  | 37  | 71  | 63   | 75  | 112 | 112 | 66  | 75  | 130 | 0.60     | 0.060755 | 77   | 0.73     | 0.044683 |
| 259978_at   | A1tg76540 | outative cell division control protein cdc cell division control protein, putative       | 409 | 501 | 463 | 540 | 594 | 486 | 458 | 540  | 0.85     | 0.114335 | 409 | 439 | 478 | 654  | 521 | 450 | 457 | 470 | 442 | 511 | 0.87     | 0.242640 | 542  | 0.82     | 0.189681 |
| 259979_at   | A1tg76600 | unknown protein : supported by full-len protein                                          | 330 | 278 | 420 | 382 | 389 | 250 | 343 | 340  | 1.01     | 0.968691 | 129 | 133 | 113 | 168  | 121 | 126 | 191 | 191 | 126 | 159 | 0.77     | 0.159493 | 138  | 0.91     | 0.485326 |
| 259980_at   | A1tg76520 | unknown protein : supported by full-len auxin efflux carrier family protein              | 330 | 61  | 36  | 55  | 52  | 44  | 43  | 50   | 0.86     | 0.500087 | 83  | 71  | 64  | 55   | 47  | 48  | 45  | 43  | 66  | 47  | 1.39     | 0.001156 | 50   | 1.32     | 0.009363 |
| 259981_at   | A1tg76580 | unknown protein : supported by full-len oxygen-binding complex-related                   | 94  | 145 | 121 | 133 | 95  | 146 | 116 | 133  | 1.08     | 0.045208 | 133 | 159 | 141 | 166  | 149 | 141 | 141 | 170 | 168 | 133 | 1.03     | 0.117058 | 176  | 0.90     | 0.157658 |
| 259982_at   | A1tg76410 | outative RING zinc finger protein cdc13 zinc finger (C3HC4-vinc RING finger) fa          | 38  | 57  | 67  | 57  | 69  | 49  | 52  | 58   | 0.89     | 0.524173 | 67  | 71  | 67  | 68   | 66  | 66  | 91  | 78  | 68  | 74  | 0.92     | 0.421905 | 67   | 1.02     | 0.409406 |
| 259983_at   | A1tg76490 | 3-hydroxy-3-methylultrivl CoA reduct 3-hydroxy-3-methylultrivl-CoA reducta               | 610 | 629 | 897 | 761 | 910 | 700 | 746 | 790  | 0.54     | 0.689639 | 673 | 794 | 739 | 851  | 753 | 653 | 792 | 752 | 735 | 760 | 0.97     | 0.638421 | 752  | 0.98     | 0.812941 |
| 259984_at   | A1tg76460 | outative RNA-binding domain contains RNA recognition motif (RRM)-containin               | 112 | 182 | 180 | 174 | 180 | 139 | 158 | 164  | 0.96     | 0.818066 | 169 | 166 | 173 | 220  | 170 | 163 | 186 | 176 | 169 | 183 | 0.93     | 0.346539 | 184  | 0.92     | 0.447433 |
| 259985_at   | A1tg76620 | unknown protein : supported by cDNA : expressed protein                                  | 51  | 68  | 41  | 51  | 49  | 45  | 38  | 48   | 0.79     | 0.022611 | 63  | 64  | 66  | 86   | 96  | 86  | 95  | 86  | 65  | 84  | 0.77     | 0.085719 | 79   | 0.82     | 0.202609 |
| 259986_at   | A1tg76500 | thaurmin-like protein similar to thaurms thaurmin-like protein, putative / pathoc        | 61  | 67  | 56  | 55  | 55  | 53  | 58  | 78   | 0.74     | 0.058115 | 51  | 44  | 50  | 60   | 46  | 44  | 41  | 37  | 48  | 45  | 1.06     | 0.622634 | 60   | 0.97     | 0.789028 |
| 259987_at   | A1tg75030 | thaurmin-like protein (PR-5) similar to pathogenesis-related thaurmin family p           | 111 | 126 | 149 | 116 | 140 | 101 | 129 | 119  | 0.88     | 0.563865 | 179 | 191 | 154 | 189  | 180 | 163 | 179 | 169 | 174 | 176 | 0.99     | 0.886480 | 177  | 0.98     | 0.838200 |
| 259993_at   | A1tg74810 | putative anion exchanger contains Pfar anion exchange family protein                     | 16  | 17  | 22  | 19  | 20  | 21  | 18  | 20   | 0.92     | 0.435760 | 13  | 17  | 15  | 13   | 13  | 16  | 19  | 17  | 15  | 16  | 0.95     | 0.680888 | 14   | 1.05     | 0.618334 |
| 259994_at   | A1tg75130 | cytochrome P450, outative similar to G cytochrome P450 family protein                    | 122 | 161 | 133 | 158 | 193 | 135 | 139 | 162  | 0.86     | 0.319604 | 124 | 128 | 128 | 179  | 147 | 145 | 149 | 140 | 127 | 152 | 0.83     | 0.033700 | 157  | 0.81     | 0.052906 |
| 259995_s_at | A1tg75080 | unknown protein : supported by full-len brassinosteroid signalling positive regul        | 418 | 469 | 503 | 663 | 664 | 522 | 483 | 616  | 0.75     | 0.045208 | 380 | 437 | 494 | 660  | 453 | 436 | 460 | 472 | 437 | 496 | 0.88     | 0.363902 | 516  | 0.85     | 0.371172 |
| 259996_at   | A1tg75110 | unknown protein : supported by full-len protein-related                                  | 141 | 162 | 153 | 198 | 234 | 152 | 152 | 195  | 0.78     | 0.154775 | 123 | 111 | 122 | 223  | 179 | 159 | 150 | 133 | 118 | 169 | 0.70     | 0.049997 | 187  | 0.63     | 0.023426 |
| 259992_at   | A1tg75040 | thaurmin-like protein similar to thaurms pathogenesis-related protein 5 (PR-5)           | 23  | 29  | 30  | 87  | 78  | 39  | 27  | 68   | 0.40     | 0.054173 | 30  | 38  | 40  | 64   | 40  | 35  | 39  | 37  | 36  | 43  | 0.85     | 0.411887 | 46   | 0.79     | 0.357029 |
| 259926_at   | A1tg75090 | putative DNA-3-methyladenine glycosy methylenadenine glycosylase family protei           | 400 | 538 | 604 | 583 | 765 | 540 | 514 | 629  | 0.82     | 0.277410 | 415 | 459 | 431 | 592  | 445 | 496 | 418 | 405 | 435 | 471 | 0.92     | 0.463927 | 511  | 0.85     | 0.165852 |
| 259927_at   | A1tg75100 | unknown protein : supported by cDNA : expressed protein                                  | 55  | 114 | 104 | 105 | 114 | 86  | 94  | 102  | 0.92     | 0.652415 | 65  | 74  | 86  | 112  | 73  | 66  | 86  | 77  | 75  | 83  | 0.91     | 0.524947 | 83   | 0.90     | 0.617933 |
| 259928_at   | A1tg34380 | DNA polymerase Ioe 1, outative simila 5'3' exonuclease family protein                    | 45  | 67  | 73  | 75  | 90  | 66  | 62  | 77   | 0.80     | 0.235658 | 79  | 76  | 86  | 104  | 81  | 78  | 83  | 72  | 80  | 84  | 0.96     | 0.642461 | 88   | 0.91     | 0.422729 |
| 259929_at   | A1tg34360 | transcription factor, outative similar to : translation initiation factor 3 (IF-3) famli | 88  | 79  | 110 | 121 | 126 | 113 | 92  | 120  | 0.77     | 0.052947 | 68  | 77  | 81  | 104  | 86  | 63  | 89  | 84  | 75  | 85  | 0.88     | 0.335543 | 84   | 0.89     | 0.519097 |
| 259930_at   | A1tg34355 | hydroethanol protein predicted by oenker forkhead-associated domain-contains             | 100 | 134 | 135 | 119 | 133 | 103 | 123 | 118  | 1.04     | 0.787775 | 83  | 79  | 105 | 108  | 89  | 75  | 100 | 96  | 89  | 94  | 0.95     | 0.658572 | 91   | 0.98     | 0.915504 |
| 259932_at   | A1tg34370 | zinc finger protein, outative similar to C zinc finger (C2H2 type) family protein        | 549 | 689 | 728 | 788 | 815 | 631 | 655 | 745  | 0.88     | 0.339125 | 671 | 668 | 766 | 977  | 787 | 739 | 890 | 833 | 701 | 845 | 0.83     | 0.053613 | 834  | 0.84     | 0.170442 |
| 259933_at   | A1tg34350 | Expressed protein : supported by full-le expressed protein                               | 266 | 311 | 328 | 393 | 430 | 330 | 302 | 384  | 0.79     | 0.074921 | 279 | 338 | 319 | 498  | 352 | 342 | 350 | 344 | 312 | 377 | 0.83     | 0.175436 | 398  | 0.79     | 0.184814 |
| 259934_at   | A1tg71340 | unknown protein : supported by full-len protein-related                                  | 90  | 134 | 121 | 142 | 154 | 115 | 115 | 137  | 0.84     | 0.272529 | 108 | 102 | 108 | 147  | 117 | 118 | 135 | 114 | 105 | 126 | 0.83     | 0.048661 | 127  | 0.83     | 0.090016 |
| 259935_at   | A1tg71250 | outative GDSL-motif lipase/acvthiolase GDSL-motif lipase/hydrolase family prot           | 111 | 11  | 14  | 11  | 14  | 13  | 12  | 13   | 0.94     | 0.805954 | 11  | 14  | 10  | 10   | 10  | 10  | 12  | 11  | 109 | 53  | 0.534388 | 11       | 1.09 | 0.513111 |          |
| 259936_at   | A1tg71200 | outative UDP-glucose oxidase UDP-glucose oxidase family protein                          | 593 | 494 | 545 | 687 | 719 | 532 | 568 | 642  | 0.83     | 0.034912 | 359 | 334 | 456 | 504  | 413 | 333 | 389 | 387 | 383 | 406 | 0.644133 | 387      | 0.62 | 0.005951 |          |
| 259937_s_at | A1tg71330 | putative ABC transporter contains Pfara ABC transporter family protein /// ABC t         | 171 | 199 | 208 | 241 | 282 | 241 | 192 | 278  | 0.69     | 0.020257 | 123 | 109 | 124 | 186  | 154 | 131 | 141 | 148 | 119 | 152 | 0.78     | 0.042608 | 157  | 0.76     | 0.086437 |
| 259938_at   | A1tg71310 | hydroethanol protein predicted by oenker forkhead-associated domain-contains             | 278 | 361 | 376 | 470 | 564 | 435 | 338 | 490  | 0.69     | 0.036880 | 434 | 506 | 489 | 700  | 541 | 517 | 508 | 465 | 476 | 546 | 0.87     | 0.258955 | 586  | 0.81     | 0.147511 |
| 259939_s_at | A1tg71300 | ARE1-like protein similar to ARE1 GB: Vps52/Sac2 family protein /// Vps52/Sac            | 153 | 210 | 197 | 260 | 264 | 182 | 187 | 235  | 0.79     | 0.199551 | 91  | 84  | 88  | 124  | 104 | 88  | 112 | 108 | 88  | 107 | 0.82     | 0.049627 | 105  | 0.83     | 0.172502 |
| 259940_at   | A1tg71280 | hydroethanol protein predicted by oenker forkhead-associated domain-contains             | 22  | 11  | 12  | 12  | 12  | 13  | 16  | 12   | 1.33     | 0.236469 | 8   | 9   | 11  | 9    | 9   | 6   | 9   | 1   | 151 | 181 | 1.24     | 0.151181 | 8    | 1.20     | 0.263632 |
| 259941_s_at | A1tg71280 | outative DEAD/DEAH box helicase con DEAD/DEAH box helicase, putative                     | 32  | 40  | 58  | 36  | 43  | 37  | 43  | 39   | 1.12     | 0.951350 | 31  | 32  | 36  | 38   | 24  | 28  | 31  | 25  | 33  | 29  | 1.13     | 0.341050 | 30   | 1.09     | 0.549533 |
| 259942_at   | A1tg71260 | unknown protein : supported by full-len protein-related                                  | 604 | 711 | 837 | 905 | 935 | 781 | 717 | 874  | 0.82     | 0.126966 | 749 | 978 | 913 | 1171 | 927 | 878 | 787 | 810 | 880 | 914 | 0.96     | 0.753488 | 902  | 0.89     | 0.381091 |
| 259943_at   | A1tg71480 | unknown protein : supported by full-len protein-related                                  | 96  | 148 | 134 | 147 | 143 | 112 | 126 | 134  | 0.94     | 0.710196 | 167 | 146 | 178 | 245  | 180 | 154 | 173 | 162 | 164 | 183 | 0.90     | 0.429697 | 193  | 0.85     | 0.363788 |
| 259944_at   | A1tg71700 | hydroethanol protein predicted by oenker forkhead-associated domain-contains             | 58  | 74  | 62  | 61  | 62  | 57  | 62  | 72   | 0.60     | 0.120361 | 66  | 74  | 76  | 38   | 28  | 36  | 71  | 33  | 28  | 33  | 2.12     | 0.003104 | 47   | 0.92     | 0.010266 |
| 259945_at   | A1tg71460 | unknown protein : supported by full-len protein-related                                  | 65  | 89  | 109 | 120 | 92  | 81  | 107 | 0.76 | 0.085469 | 66       | 61  | 69  | 89  | 81   | 73  | 80  | 75  | 65  | 80  | 82  | 0.81     | 0.013676 | 81   | 0.81     | 0.039437 |
| 259946_at   | A1tg71450 | outative TINY similar to TINY GB:CAA6 outative TINY similar to TINY GB:CAA6              | 31  | 28  | 35  | 34  | 33  | 29  | 31  | 32   | 0.98     | 0.816500 | 30  | 39  | 33  | 29   | 28  | 22  | 27  | 30  | 34  | 27  | 1.24     | 0.050821 | 26   | 1.28     | 0.105979 |
| 259947_at   | A1tg71530 | outative protein kinase similar to protein kinase family protein                         | 16  | 13  | 18  | 12  | 20  | 13  | 16  | 15   | 1.03     | 0.885626 | 12  | 11  | 13  | 11   | 9   | 9   | 11  | 12  | 12  | 10  | 1.12     | 0.223351 | 10   | 1.19     | 0.134905 |
| 259948_at   | A1tg71350 | unknown protein similar to LGATIN G1 eukarotic translation initiation factor SU          | 262 | 383 | 423 | 400 | 440 | 348 | 356 | 395  | 0.90     | 0.505183 | 206 | 197 | 204 | 255  | 228 | 206 | 227 | 232 | 202 | 228 | 0.89     | 0.052742 | 227  | 0.89     | 0.162594 |
| 259949_at   | A1tg71420 | hydroethanol protein predicted by oenker forkhead-associated domain-contains             | 34  | 37  | 44  | 37  | 45  | 33  | 42  | 37   | 0.77     | 0.057757 | 25  | 32  | 31  | 42   | 38  | 32  | 32  | 29  | 33  | 32  | 1.01     | 0.847755 | 29   | 1.11     | 0.527275 |
| 259950_at   | A1tg71410 | hydroethanol protein predicted by oenker forkhead-associated domain-contains             | 126 | 174 | 164 | 158 | 175 | 139 | 155 | 157  | 0.88     | 0.897845 | 117 | 124 | 131 | 156  | 130 | 110 | 151 | 135 | 124 | 136 | 0.91     | 0.317042 | 132  | 0.94     | 0.597215 |
| 259951_at   | A1tg71490 | unknown protein : supported by full-len protein-related                                  | 47  | 56  | 60  | 72  | 77  | 54  | 54  | 67   | 0.80     | 0.167559 | 37  | 40  | 47  | 41   | 39  | 39  | 48  | 41  | 41  | 41  | 0.99     | 0.934091 | 40   | 1.04     | 0.619170 |
| 259952_at   | A1tg71400 | outative disease resistance protein sim disease resistance family protein / LRR1         | 17  | 19  | 25  | 23  | 24  | 25  | 21  | 24   | 0.86     | 0.239517 | 16  | 15  | 17  | 16   | 14  | 15  | 17  | 16  | 16  | 16  | 1.01     | 0.848437 | 15   | 1.04     | 0.495738 |
| 259953_at   | A1tg71390 | outative disease resistance protein sim disease resistance family protein / LRR1         | 22  | 24  | 26  | 23  | 10  | 13  | 10  | 13   | 0.73     | 0.059130 | 7   | 7   | 13  | 8    | 8   | 8   | 7   | 6   | 7   | 7   | 0.85     | 0.410989 | 7    | 0.89     | 0.621384 |
| 259954_at   | A1tg71430 | hydroethanol protein predicted by oenker forkhead-associated domain-contains             | 282 | 354 | 376 | 420 | 490 | 321 | 337 | 410  | 0.82     | 0.267382 | 382 | 396 | 523 | 554  | 439 | 445 | 447 | 397 | 367 | 457 | 0.80     | 0.058990 | 479  | 0.77     | 0.061654 |
| 259955_at   | A1tg71440 | unknown protein : supported by full-len protein-related                                  | 216 | 174 | 162 | 199 | 217 | 173 | 163 | 196  | 0.83     | 0.123805 | 117 | 112 | 122 | 172  | 135 | 122 | 156 | 151 | 117 | 147 | 0.80     | 0.042790 | 143  | 0.82     |          |

|           |           |                                                                                          |      |      |      |      |      |      |      |      |          |          |          |      |      |      |      |      |      |      |      |      |      |           |          |      |          |          |
|-----------|-----------|------------------------------------------------------------------------------------------|------|------|------|------|------|------|------|------|----------|----------|----------|------|------|------|------|------|------|------|------|------|------|-----------|----------|------|----------|----------|
| 259879_at | At1g76650 | putative calmodulin similar to calmodulin calcium-binding EF hand family protein         | 143  | 58   | 170  | 213  | 187  | 179  | 124  | 193  | 0.64     | 0.122357 | 48       | 44   | 39   | 56   | 48   | 52   | 69   | 70   | 44   | 59   | 0.74 | 0.051089  | 52       | 0.84 | 0.082089 |          |
| 259880_at | At1g76730 | hypothetical protein similar to hypotense 5-formyltetrahydrofolate cyclo-lyase fam       | 161  | 275  | 215  | 236  | 270  | 209  | 217  | 238  | 0.91     | 0.597882 | 286      | 318  | 321  | 411  | 310  | 302  | 336  | 309  | 309  | 334  | 0.92 | 0.406229  | 341      | 0.90 | 0.428213 |          |
| 259881_at | At1g76820 | Expressed protein : supported by cDNA: expressed protein                                 | 118  | 118  | 140  | 115  | 120  | 133  | 125  | 123  | 1.02     | 0.811315 | 96       | 93   | 137  | 103  | 104  | 91   | 111  | 119  | 109  | 106  | 1.03 | 0.815897  | 99       | 1.09 | 0.561207 |          |
| 259882_at | At1g76870 | unknown protein similar to hydrophobic transporter                                       | 594  | 694  | 694  | 704  | 554  | 572  | 562  | 572  | 0.82     | 0.108463 | 548      | 572  | 543  | 453  | 578  | 569  | 574  | 577  | 577  | 569  | 0.77 | 0.034259  | 568      | 0.74 | 0.071873 |          |
| 259883_at | At1g76400 | putative ribophorin I (dolichyl-dihydrosohi ribophorin I family protein                  | 528  | 515  | 609  | 659  | 704  | 557  | 564  | 640  | 0.88     | 0.201329 | 408      | 330  | 411  | 489  | 467  | 348  | 477  | 431  | 383  | 442  | 0.87 | 0.178921  | 435      | 0.88 | 0.389528 |          |
| 259884_at | At1g76390 | hypothetical protein predicted by geneic armadillo/beta-catenin repeat family            | 69   | 90   | 100  | 131  | 153  | 120  | 83   | 135  | 0.61     | 0.012649 | 38       | 41   | 42   | 80   | 66   | 57   | 79   | 68   | 40   | 70   | 0.58 | 0.020332  | 68       | 0.60 | 0.015376 |          |
| 259885_at | At1g76380 | hypothetical protein contains Plam prof DNA-binding bromodomain-containing p             | 167  | 235  | 219  | 241  | 255  | 205  | 207  | 234  | 0.88     | 0.347354 | 143      | 124  | 151  | 178  | 162  | 135  | 181  | 177  | 139  | 166  | 0.84 | 0.080647  | 158      | 0.88 | 0.279289 |          |
| 259886_at | At1g76370 | putative protein kinase similar to protein kinase kinase, putative                       | 37   | 47   | 31   | 31   | 46   | 37   | 40   | 36   | 1.06     | 0.070483 | 24       | 24   | 25   | 21   | 23   | 21   | 23   | 24   | 25   | 22   | 1.12 | 0.174060  | 22       | 1.15 | 0.067255 |          |
| 259887_at | At1g76360 | putative protein kinase similar to protein kinase kinase, putative                       | 26   | 28   | 39   | 40   | 43   | 36   | 31   | 40   | 0.78     | 0.125301 | 28       | 20   | 30   | 28   | 26   | 25   | 32   | 38   | 26   | 30   | 0.86 | 0.330108  | 26       | 0.98 | 0.861407 |          |
| 259888_at | At1g76350 | hypothetical protein similar to nucleide in RWR-RK domain-containing protein             | 78   | 96   | 100  | 118  | 110  | 107  | 81   | 105  | 0.87     | 0.306887 | 77       | 82   | 91   | 130  | 94   | 79   | 115  | 102  | 83   | 104  | 0.80 | 0.131636  | 101      | 0.83 | 0.318175 |          |
| 259889_at | At1g76405 | oredicted protein : supported by cDNA: expressed protein                                 | 285  | 407  | 380  | 373  | 390  | 325  | 357  | 363  | 0.98     | 0.898844 | 269      | 319  | 305  | 440  | 335  | 311  | 357  | 370  | 297  | 363  | 0.82 | 0.080895  | 362      | 0.82 | 0.201985 |          |
| 259890_at | At1g68420 | putative asparaginyl-RNA synthetase : asparaginyl-RNA synthetase-related                 | 8    | 14   | 19   | 14   | 17   | 13   | 14   | 15   | 0.92     | 0.142506 | 9        | 8    | 10   | 10   | 8    | 12   | 8    | 9    | 11   | 7    | 0.9  | 0.05      | 9        | 0.95 | 0.689486 |          |
| 259891_at | At1g68440 | unknown protein : supported by full-lenc expressed protein                               | 179  | 529  | 368  | 137  | 173  | 84   | 359  | 132  | 2.73     | 0.094863 | 12       | 148  | 68   | 132  | 100  | 96   | 132  | 130  | 103  | 120  | 0.86 | 0.1446518 | 154      | 0.78 | 0.811662 |          |
| 259892_at | At1g68430 | hypothetical protein predicted by geneic expressed protein                               | 51   | 70   | 69   | 100  | 108  | 102  | 63   | 103  | 0.61     | 0.003706 | 85       | 99   | 94   | 138  | 89   | 86   | 84   | 85   | 93   | 96   | 0.96 | 0.791344  | 104      | 0.89 | 0.534525 |          |
| 259893_at | At1g68400 | putative receptor kinase similar to leucine-rich repeat transmembrane prot               | 550  | 579  | 594  | 637  | 787  | 584  | 574  | 669  | 0.86     | 0.200103 | 369      | 323  | 367  | 635  | 588  | 472  | 584  | 525  | 353  | 561  | 0.63 | 0.001807  | 505      | 0.62 | 0.013810 |          |
| 259894_at | At1g68410 | putative orlelin phosphatase similar to protein phosphatase 2C-related / PP2C-           | 181  | 171  | 191  | 251  | 256  | 198  | 181  | 235  | 0.77     | 0.049681 | 211      | 215  | 213  | 368  | 273  | 232  | 280  | 270  | 213  | 285  | 0.75 | 0.053102  | 291      | 0.73 | 0.124236 |          |
| 259895_at | At1g69540 | unknown protein : supported by full-lenc expressed protein                               | 185  | 281  | 303  | 227  | 312  | 329  | 261  | 231  | 300      | 0.77     | 0.115786 | 124  | 92   | 143  | 177  | 149  | 137  | 167  | 156  | 120  | 157  | 0.76      | 0.039891 | 154  | 0.78     | 0.144085 |
| 259896_at | At1g60615 | putative protein similar to ribosomal or ribosomal protein S15 family protein            | 177  | 236  | 205  | 253  | 258  | 224  | 206  | 245  | 0.84     | 0.129411 | 227      | 215  | 228  | 325  | 246  | 218  | 265  | 233  | 224  | 257  | 0.87 | 0.225424  | 263      | 0.85 | 0.289369 |          |
| 259897_at | At1g60630 | hypothetical protein predicted by geneic leucine-rich repeat family protein              | 97   | 117  | 121  | 120  | 132  | 92   | 111  | 115  | 0.97     | 0.088281 | 92       | 75   | 87   | 114  | 98   | 83   | 101  | 105  | 85   | 100  | 0.85 | 0.088828  | 98       | 0.86 | 0.250635 |          |
| 259898_at | At1g69600 | hypothetical protein predicted by geneic zinc finger homeobox family protein / ZF        | 69   | 92   | 100  | 107  | 113  | 89   | 87   | 103  | 0.84     | 0.244291 | 85       | 108  | 99   | 148  | 102  | 90   | 125  | 123  | 97   | 118  | 0.83 | 0.203738  | 113      | 0.86 | 0.446297 |          |
| 259899_at | At1g69580 | transfactor, putative similar to Gl4519 myb family transcription factor                  | 20   | 23   | 23   | 29   | 26   | 27   | 25   | 28   | 0.90     | 0.418536 | 28       | 29   | 25   | 64   | 37   | 36   | 40   | 35   | 27   | 42   | 0.63 | 0.075674  | 46       | 0.59 | 0.108492 |          |
| 259900_at | At1g69560 | MYB-family transcription factor, putative myb family transcription factor (MYB105        | 25   | 23   | 29   | 30   | 32   | 31   | 26   | 31   | 0.84     | 0.070643 | 22       | 26   | 32   | 25   | 21   | 27   | 21   | 24   | 27   | 24   | 1.14 | 0.279622  | 24       | 1.10 | 0.524407 |          |
| 259901_at | At1g69570 | H-rotein oromotor binding factor-2b ne DoF-type zinc finger domain-containing c          | 71   | 98   | 97   | 94   | 96   | 75   | 89   | 89   | 1.00     | 0.974318 | 107      | 112  | 113  | 127  | 114  | 98   | 110  | 112  | 110  | 112  | 0.98 | 0.772567  | 113      | 0.98 | 0.758683 |          |
| 259902_at | At1g52160 | unknown protein : metallo-beta-lactamase family protein                                  | 211  | 258  | 249  | 292  | 320  | 257  | 239  | 289  | 0.83     | 0.096556 | 199      | 162  | 214  | 283  | 242  | 203  | 257  | 258  | 192  | 249  | 0.77 | 0.033592  | 243      | 0.79 | 0.138204 |          |
| 259903_at | At1g52240 | expressed protein                                                                        | 12   | 11   | 15   | 13   | 17   | 13   | 13   | 14   | 0.89     | 0.430111 | 13       | 9    | 22   | 8    | 11   | 15   | 9    | 15   | 10   | 14   | 1.42 | 0.218636  | 9        | 1.60 | 0.224719 |          |
| 259904_at | At1g52180 | asquaporin, putative similar to delta ton major intrinsic family protein / MIP famly     | 62   | 84   | 76   | 91   | 108  | 72   | 74   | 90   | 0.82     | 0.246103 | 48       | 51   | 67   | 56   | 63   | 66   | 52   | 54   | 55   | 58   | 0.95 | 0.660643  | 61       | 0.90 | 0.422608 |          |
| 259905_at | At1g52220 | unknown protein : supported by full-lenc expressed protein                               | 239  | 573  | 487  | 532  | 579  | 389  | 465  | 500  | 0.93     | 0.718317 | 523      | 508  | 550  | 725  | 622  | 560  | 660  | 603  | 527  | 634  | 0.83 | 0.030440  | 636      | 0.83 | 0.092420 |          |
| 259906_at | At1g52190 | peptide transporter, putative similar to orolon-dependent olocoecide transp              | 336  | 435  | 312  | 672  | 724  | 472  | 349  | 623  | 0.56     | 0.035867 | 295      | 237  | 251  | 455  | 392  | 381  | 348  | 320  | 261  | 379  | 0.69 | 0.011765  | 409      | 0.64 | 0.006830 |          |
| 259907_at | At1g52230 | phosvotsein I subunit VI precursor like phosvotsein I reaction center subunit VI         | 1054 | 1459 | 1273 | 1626 | 1820 | 1309 | 1275 | 1585 | 0.80     | 0.193080 | 1572     | 1722 | 1776 | 2319 | 2140 | 1831 | 1951 | 1869 | 1690 | 2022 | 0.84 | 0.042843  | 2097     | 0.81 | 0.058391 |          |
| 259908_at | At1g52200 | unknown protein : supported by full-lenc expressed protein                               | 23   | 23   | 29   | 27   | 29   | 24   | 29   | 24   | 0.92     | 0.218842 | 24       | 24   | 23   | 29   | 24   | 23   | 24   | 23   | 24   | 23   | 1.02 | 0.0321    | 24       | 1.02 | 0.0321   |          |
| 259909_at | At1g73600 | phosphoethanolamine N-methyltransferase phosphoethanolamine N-methyltransfer             | 392  | 307  | 484  | 1381 | 1075 | 1210 | 391  | 1822 | 0.32     | 0.001244 | 592      | 494  | 704  | 1589 | 1232 | 917  | 942  | 958  | 597  | 1128 | 0.53 | 0.024181  | 1246     | 0.48 | 0.033184 |          |
| 259910_at | At1g73570 | hypothetical protein predicted by geneic suppressor of lin-12-like protein-related ;     | 85   | 116  | 129  | 122  | 139  | 102  | 110  | 121  | 0.90     | 0.529034 | 87       | 80   | 90   | 112  | 87   | 84   | 100  | 92   | 86   | 95   | 0.90 | 0.241419  | 94       | 0.91 | 0.408165 |          |
| 259911_at | At1g73560 | lipid transfer protein, putative similar to protease inhibitor/seed storage/lipid tran   | 39   | 52   | 55   | 21   | 22   | 22   | 49   | 22   | 2.24     | 0.055234 | 78       | 114  | 82   | 20   | 19   | 18   | 19   | 17   | 91   | 19   | 4.94 | 0.003122  | 19       | 4.82 | 0.003098 |          |
| 259912_at | At1g73550 | auxin transporter solice variant b, puta auxin efflux carrier protein, putative          | 250  | 271  | 279  | 436  | 426  | 426  | 247  | 436  | 0.56     | 0.014665 | 148      | 149  | 189  | 321  | 239  | 199  | 189  | 186  | 162  | 229  | 0.71 | 0.094221  | 253      | 0.64 | 0.068455 |          |
| 259913_at | At1g72140 | peptide transporter FTR2-B, putative s proton-dependent olocoecide transp                | 40   | 43   | 47   | 32   | 36   | 35   | 43   | 34   | 1.26     | 0.021999 | 40       | 47   | 46   | 27   | 21   | 26   | 24   | 24   | 44   | 24   | 1.82 | 0.000600  | 25       | 1.81 | 0.001957 |          |
| 259914_at | At1g72170 | unknown protein                                                                          | 593  | 795  | 787  | 888  | 1002 | 794  | 725  | 895  | 0.81     | 0.130351 | 836      | 897  | 1002 | 1256 | 932  | 958  | 843  | 875  | 911  | 973  | 0.94 | 0.576847  | 1049     | 0.87 | 0.296743 |          |
| 259915_at | At1g72180 | leucine-rich receptor-like protein kinase leucine-rich repeat transmembrane prot         | 231  | 246  | 241  | 286  | 332  | 224  | 239  | 280  | 0.85     | 0.265293 | 116      | 112  | 117  | 228  | 184  | 160  | 226  | 194  | 115  | 198  | 0.58 | 0.003024  | 190      | 0.60 | 0.019518 |          |
| 259916_at | At1g72190 | phosphogluconate dehydrogenase, putative oxidoreductase family protein                   | 162  | 193  | 190  | 214  | 161  | 191  | 188  | 0.86 | 0.317577 | 168      | 174      | 162  | 277  | 209  | 219  | 219  | 219  | 219  | 219  | 219  | 0.79 | 0.039284  | 235      | 0.74 | 0.063506 |          |
| 259917_at | At1g72240 | hypothetical protein predicted by geneic expressed protein                               | 94   | 73   | 132  | 159  | 125  | 133  | 99   | 139  | 0.71     | 0.118685 | 151      | 211  | 177  | 235  | 165  | 161  | 196  | 197  | 180  | 191  | 0.94 | 0.621182  | 187      | 0.96 | 0.811630 |          |
| 259918_at | At1g72250 | kinasin, putative : kinasin motor protein-related                                        | 233  | 287  | 244  | 289  | 313  | 236  | 255  | 279  | 0.91     | 0.425898 | 194      | 154  | 218  | 247  | 217  | 173  | 171  | 172  | 189  | 196  | 0.96 | 0.774852  | 212      | 0.89 | 0.450521 |          |
| 259919_at | At1g72280 | disulfide bond formation protein, putaai endoplasmic reticulum oxidoreductin I II        | 125  | 132  | 147  | 85   | 92   | 82   | 135  | 86   | 1.56     | 0.002642 | 83       | 77   | 102  | 72   | 67   | 56   | 75   | 67   | 87   | 67   | 1.30 | 0.029163  | 65       | 1.35 | 0.065266 |          |
| 259920_at | At1g72300 | leucine-rich receptor-like protein kinase leucine-rich repeat transmembrane prot         | 54   | 42   | 58   | 60   | 59   | 48   | 51   | 55   | 0.92     | 0.480991 | 32       | 31   | 32   | 44   | 45   | 41   | 34   | 32   | 32   | 39   | 0.81 | 0.073241  | 43       | 0.73 | 0.001092 |          |
| 259921_at | At1g72200 | RING-H2 zinc finger protein ATL3, put zinc finger (C3HC4-type RING finger) fa            | 25   | 33   | 31   | 27   | 35   | 36   | 30   | 37   | 0.80     | 0.192843 | 25       | 25   | 37   | 28   | 36   | 32   | 37   | 30   | 27   | 30   | 0.83 | 0.138054  | 30       | 0.83 | 0.310476 |          |
| 259922_at | At1g72270 | unknown protein : expressed protein                                                      | 25   | 33   | 31   | 27   | 35   | 36   | 30   | 33   | 0.92     | 0.498655 | 29       | 34   | 36   | 31   | 26   | 28   | 23   | 27   | 33   | 27   | 1.21 | 0.043664  | 28       | 1.16 | 0.151893 |          |
| 259923_at | At1g72220 | RING-H2 zinc finger protein ATL3, put zinc finger (C3HC4-type RING finger) fa            | 44   | 57   | 73   | 64   | 68   | 64   | 58   | 65   | 0.89     | 0.451775 | 41       | 52   | 55   | 46   | 39   | 43   | 54   | 50   | 49   | 46   | 1.06 | 0.546076  | 43       | 1.15 | 0.243414 |          |
| 259924_at | At1g72130 | oloocoeide transporter, putative simli orolon-dependent oloocoeide transp                | 21   | 25   | 30   | 27   | 24   | 45   | 25   | 32   | 0.79     | 0.353248 | 18       | 19   | 27   | 22   | 18   | 14   | 22   | 20   | 21   | 19   | 1.11 | 0.473362  | 18       | 1.17 | 0.439464 |          |
| 259925_at | At1g71950 | drouct induced protein, putative simli hydrophobic and protease inhibitor fam            | 654  | 130  | 560  | 1561 | 1060 | 637  | 130  | 642  | 0.34     | 0.102270 | 73       | 118  | 146  | 549  | 309  | 277  | 328  | 306  | 112  | 332  | 0.91 | 0.011928  | 378      | 0.97 | 0.039689 |          |
| 259926_at | At1g72175 | Expressed protein : supported by full-lenc expressed protein (C3HC4-type RING finger) fa | 139  | 175  | 198  | 177  | 198  | 152  | 1    |      |          |          |          |      |      |      |      |      |      |      |      |      |      |           |          |      |          |          |

|           |           |                                                                                           |      |      |      |     |      |          |      |      |          |           |          |     |      |      |      |          |     |     |     |      |          |          |      |          |          |          |
|-----------|-----------|-------------------------------------------------------------------------------------------|------|------|------|-----|------|----------|------|------|----------|-----------|----------|-----|------|------|------|----------|-----|-----|-----|------|----------|----------|------|----------|----------|----------|
| 256791_at | At1g29700 | unknown protein ; supported by cDNA: expressed protein                                    | 63   | 95   | 93   | 113 | 110  | 191      | 84   | 104  | 0.80     | 0.175650  | 110      | 122 | 109  | 166  | 127  | 109      | 130 | 110 | 114 | 129  | 0.88     | 0.326880 | 134  | 0.85     | 0.299378 |          |
| 256792_at | At1g29690 | unknown protein ; supported by cDNA: expressed protein                                    | 148  | 149  | 179  | 218 | 264  | 195      | 159  | 225  | 0.70     | 0.041393  | 99       | 95  | 108  | 151  | 113  | 103      | 135 | 123 | 101 | 125  | 0.81     | 0.082743 | 122  | 0.82     | 0.228743 |          |
| 256793_at | At1g64380 | AP2-containing DNA-binding protein cα AP2 domain-containing transcription factor          | 71   | 76   | 86   | 51  | 66   | 46       | 78   | 54   | 1.43     | 0.031807  | 59       | 60  | 58   | 43   | 38   | 32       | 48  | 51  | 59  | 42   | 1.39     | 0.012483 | 37   | 1.57     | 0.002861 |          |
| 256794_at | At1g64390 | unknown protein                                                                           | 161  | 213  | 177  | 231 | 228  | 182      | 213  | 0.77 | 0.041604 | 164       | 162      | 177 | 109  | 163  | 109  | 163      | 220 | 163 | 219 | 0.77 | 0.111918 | 279      | 0.78 | 0.290979 |          |          |
| 256795_at | At1g64290 | hypothetical protein predicted by geneF: Hsp70 family-related                             | 49   | 56   | 71   | 68  | 70   | 75       | 59   | 71   | 0.82     | 0.142991  | 34       | 40  | 44   | 37   | 39   | 36       | 35  | 36  | 39  | 37   | 1.07     | 0.353954 | 37   | 1.04     | 0.646465 |          |
| 256796_at | At1g64270 | hypothetical protein predicted by geneF: Mutator-like transposase family                  | 50   | 59   | 59   | 63  | 68   | 48       | 56   | 60   | 0.94     | 0.624846  | 50       | 45  | 53   | 54   | 45   | 50       | 52  | 49  | 49  | 50   | 0.99     | 0.789297 | 50   | 0.99     | 0.888450 |          |
| 256797_at | At1g64410 | unknown protein                                                                           | 10   | 13   | 17   | 18  | 16   | 16       | 13   | 17   | 0.81     | 0.2201043 | 9        | 11  | 12   | 10   | 11   | 9        | 8   | 9   | 11  | 9    | 1.13     | 0.251677 | 10   | 1.05     | 0.657751 |          |
| 256798_at | At1g64310 | hypothetical protein predicted by geneF: pentatricopeptide (PPR) repeat-containing        | 33   | 47   | 62   | 59  | 66   | 52       | 61   | 60   | 0.81     | 0.2801918 | 34       | 36  | 30   | 34   | 35   | 24       | 28  | 28  | 28  | 28   | 1.05     | 0.614126 | 214  | 0.91     | 0.773399 |          |
| 256799_at | At1g64280 | transcription factor inhibitor 1 kaopa B regulatory protein (NPR1)                        | 29   | 29   | 32   | 34  | 39   | 35       | 30   | 36   | 0.82     | 0.032457  | 23       | 24  | 30   | 26   | 26   | 27       | 27  | 23  | 26  | 26   | 1.01     | 0.940842 | 26   | 0.98     | 0.828532 |          |
| 256799_at | At1g64370 | unknown protein ; supported by full-length expressed protein                              | 25   | 27   | 41   | 29  | 35   | 50       | 31   | 38   | 0.82     | 0.442511  | 22       | 20  | 26   | 35   | 29   | 29       | 44  | 33  | 26  | 38   | 0.68     | 0.025911 | 34   | 0.76     | 0.088285 |          |
| 256799_at | At1g64360 | unknown protein ; supported by full-length expressed protein                              | 14   | 17   | 20   | 19  | 18   | 21       | 17   | 19   | 0.90     | 0.368429  | 11       | 11  | 15   | 12   | 9    | 13       | 10  | 12  | 12  | 11   | 1.07     | 0.559960 | 11   | 1.07     | 0.671933 |          |
| 256799_at | At1g64405 | Excessed protein ; supported by full-length expressed protein                             | 17   | 18   | 28   | 65  | 62   | 62       | 62   | 62   | 0.33     | 0.003032  | 30       | 26  | 32   | 112  | 90   | 77       | 76  | 72  | 29  | 85   | 0.35     | 0.001286 | 93   | 0.32     | 0.003590 |          |
| 256799_at | At1g64390 | endo-beta-1,4-glucanase, putative sim endo-1,4-beta-glucanase, putative / cell            | 264  | 318  | 369  | 697 | 767  | 609      | 317  | 691  | 0.46     | 0.002432  | 182      | 121 | 197  | 416  | 340  | 277      | 246 | 250 | 166 | 307  | 0.54     | 0.020453 | 345  | 0.48     | 0.019300 |          |
| 256799_at | At1g64400 | acyl-CoA synthetase, putative similar t long-chain-fatty-acid-CoA ligase, putative        | 36   | 36   | 44   | 42  | 37   | 38       | 39   | 39   | 0.99     | 0.899929  | 28       | 28  | 34   | 35   | 26   | 25       | 33  | 34  | 30  | 31   | 0.97     | 0.763256 | 29   | 1.03     | 0.799177 |          |
| 256799_at | At1g64355 | predicted protein                                                                         | 67   | 91   | 80   | 80  | 82   | 63       | 80   | 75   | 1.07     | 0.621191  | 79       | 88  | 86   | 95   | 76   | 79       | 90  | 84  | 85  | 85   | 1.00     | 0.971081 | 83   | 1.02     | 0.846587 |          |
| 256799_at | At1g64350 | unknown protein supported by cDNA: transducin family protein / WD-40 repeat               | 270  | 348  | 346  | 364 | 423  | 303      | 321  | 363  | 0.86     | 0.385699  | 345      | 340 | 367  | 509  | 397  | 375      | 389 | 369 | 500 | 408  | 0.86     | 0.149972 | 427  | 0.82     | 0.143113 |          |
| 256799_at | At1g71180 | putative dehydrogenase similar to D-th-6-phosphoacetyl-CoA dehydrogenase NA               | 409  | 406  | 406  | 483 | 549  | 422      | 380  | 491  | 0.77     | 0.055308  | 405      | 418 | 467  | 649  | 514  | 495      | 484 | 528 | 430 | 534  | 0.81     | 0.047928 | 553  | 0.78     | 0.077364 |          |
| 256799_at | At1g71100 | putative ribose 5-phosphate isomerase thio-ribose 5-phosphate isomerase-related           | 91   | 96   | 89   | 124 | 138  | 127      | 92   | 130  | 0.71     | 0.001435  | 88       | 113 | 101  | 153  | 107  | 109      | 122 | 116 | 101 | 121  | 0.83     | 0.140896 | 123  | 0.82     | 0.250933 |          |
| 256799_at | At1g71130 | hypothetical protein predicted by geneF: AP2 domain-containing transcription fac          | 171  | 244  | 284  | 284 | 316  | 274      | 233  | 292  | 0.80     | 0.174690  | 213      | 230 | 259  | 339  | 279  | 252      | 254 | 246 | 234 | 274  | 0.86     | 0.164231 | 290  | 0.81     | 0.127239 |          |
| 256799_at | At1g71030 | unknown protein predicted by geneF: AP2 domain-containing transcription fac               | 188  | 299  | 377  | 180 | 177  | 114      | 288  | 157  | 1.84     | 0.089841  | 341      | 400 | 294  | 630  | 458  | 491      | 605 | 598 | 345 | 556  | 0.62     | 0.005917 | 526  | 0.66     | 0.040672 |          |
| 256799_at | At1g71040 | score coat protein-like protein similar to m myb family transcription factor              | 114  | 132  | 163  | 120 | 108  | 106      | 137  | 111  | 1.23     | 0.187168  | 203      | 245 | 191  | 247  | 189  | 158      | 292 | 283 | 213 | 234  | 0.91     | 0.588954 | 198  | 1.07     | 0.860022 |          |
| 256799_at | At1g71440 | unknown protein predicted by geneF: MATE efflux family protein                            | 25   | 33   | 42   | 35  | 35   | 35       | 35   | 35   | 0.81     | 0.041650  | 47       | 38  | 43   | 38   | 40   | 42       | 47  | 40  | 47  | 47   | 0.80     | 0.133445 | 60   | 0.80     | 0.003683 |          |
| 256799_at | At1g71090 | hypothetical protein predicted by geneF: cDNA: multi-exon efflux carrier family protein   | 144  | 182  | 187  | 197 | 229  | 168      | 171  | 198  | 0.86     | 0.292109  | 168      | 184 | 180  | 240  | 205  | 185      | 234 | 236 | 177 | 220  | 0.81     | 0.028878 | 210  | 0.84     | 0.128240 |          |
| 256799_at | At1g71070 | unknown protein similar to glucosaminyl glucosyltransferase family 14 protein / c         | 125  | 137  | 107  | 178 | 202  | 157      | 123  | 179  | 0.69     | 0.023182  | 101      | 90  | 117  | 183  | 146  | 131      | 115 | 117 | 102 | 137  | 0.74     | 0.083730 | 154  | 0.67     | 0.043007 |          |
| 256799_at | At1g71080 | unknown protein ; supported by cDNA: expressed protein                                    | 169  | 203  | 232  | 242 | 247  | 209      | 201  | 233  | 0.86     | 0.217723  | 219      | 253 | 238  | 335  | 247  | 236      | 315 | 289 | 237 | 284  | 0.83     | 0.122070 | 273  | 0.87     | 0.336731 |          |
| 256799_at | At1g71510 | putative thioesterase similar to protein di protein disulfide isomerase, putative         | 1054 | 1178 | 1257 | 469 | 408  | 434      | 1153 | 447  | 2.60     | 0.003044  | 893      | 829 | 1107 | 1449 | 342  | 298      | 369 | 379 | 943 | 367  | 2.57     | 0.000170 | 363  | 2.60     | 0.003683 |          |
| 256799_at | At1g71530 | putative caffeic acid 3-O-methyltransferase C-methyltransferase family 2 protein / c      | 57   | 70   | 75   | 141 | 159  | 115      | 67   | 139  | 0.48     | 0.006627  | 45       | 63  | 60   | 111  | 89   | 84       | 81  | 73  | 56  | 87   | 0.64     | 0.016218 | 94   | 0.59     | 0.019051 |          |
| 256799_at | At1g77550 | hypothetical protein similar to GB-CAB tubulin-tyrosine ligase family protein             | 196  | 246  | 244  | 272 | 306  | 219      | 229  | 265  | 0.86     | 0.290044  | 235      | 196 | 233  | 262  | 263  | 219      | 223 | 231 | 221 | 240  | 0.92     | 0.287955 | 248  | 0.89     | 0.233088 |          |
| 256799_at | At1g77580 | hypothetical protein similar to GB-AAD1 myosin heavy chain-related                        | 247  | 283  | 264  | 313 | 363  | 244      | 265  | 307  | 0.86     | 0.309795  | 208      | 134 | 211  | 272  | 237  | 184      | 264 | 251 | 184 | 241  | 0.76     | 0.083766 | 231  | 0.80     | 0.261297 |          |
| 256799_at | At1g77440 | putative acyl-CoA synthetase similar to long-chain-fatty-acid-CoA ligase family           | 313  | 403  | 359  | 499 | 513  | 405      | 355  | 473  | 0.75     | 0.054964  | 233      | 195 | 251  | 302  | 259  | 218      | 244 | 227 | 233 | 250  | 0.80     | 0.139450 | 280  | 0.82     | 0.047547 |          |
| 256799_at | At1g77600 | hypothetical protein predicted by geneF: expressed protein                                | 190  | 274  | 275  | 317 | 377  | 262      | 246  | 319  | 0.77     | 0.169372  | 224      | 165 | 226  | 291  | 265  | 211      | 237 | 223 | 205 | 245  | 0.84     | 0.149892 | 256  | 0.80     | 0.177982 |          |
| 256799_at | At1g77630 | unknown protein similar to GB-AAB816 peptidyl-carboxyl-binding LysM domain-c              | 263  | 275  | 242  | 329 | 344  | 282      | 260  | 318  | 0.82     | 0.051338  | 242      | 231 | 247  | 357  | 296  | 239      | 320 | 292 | 240 | 301  | 0.80     | 0.056806 | 297  | 0.81     | 0.169704 |          |
| 256799_at | At1g77640 | hypothetical protein predicted by geneF: AP2 domain-containing transcription fac          | 46   | 16   | 36   | 15  | 19   | 19       | 31   | 17   | 1.77     | 0.154550  | 41       | 57  | 27   | 27   | 21   | 21       | 30  | 28  | 41  | 25   | 1.63     | 0.058669 | 23   | 1.81     | 0.106252 |          |
| 256799_at | At1g77680 | unknown protein similar to Hypothetical MGRN (Membrane Occupation and Rec                 | 170  | 218  | 237  | 262 | 297  | 248      | 209  | 277  | 0.69     | 0.068586  | 175      | 138 | 161  | 175  | 168  | 175      | 168 | 158 | 195 | 185  | 0.81     | 0.107591 | 207  | 0.78     | 0.102312 |          |
| 256799_at | At1g77460 | unknown protein similar to unknown pr cα domain-containing protein / armadil              | 137  | 160  | 124  | 172 | 0.72 | 0.108985 | 107  | 138  | 102      | 0.72      | 0.108985 | 107 | 138  | 102  | 0.72 | 0.108985 | 107 | 138 | 102 | 0.72 | 0.108985 | 107      | 138  | 102      | 0.72     | 0.108985 |
| 256799_at | At1g77470 | putative replication factor C similar to rε replication factor C 36 kDa, putative         | 513  | 641  | 627  | 738 | 780  | 637      | 594  | 718  | 0.83     | 0.101647  | 574      | 533 | 573  | 795  | 645  | 634      | 645 | 630 | 560 | 670  | 0.84     | 0.043037 | 691  | 0.81     | 0.070106 |          |
| 256799_at | At1g77480 | nucleolin-like protein similar to nucleolin C nucleolin protein, putative                 | 189  | 269  | 296  | 300 | 317  | 222      | 251  | 279  | 0.90     | 0.555480  | 218      | 215 | 216  | 266  | 222  | 211      | 237 | 221 | 217 | 231  | 0.94     | 0.295478 | 233  | 0.93     | 0.389324 |          |
| 256799_at | At1g77500 | unknown protein similar to GB-AAD414 expressed protein                                    | 47   | 49   | 55   | 80  | 83   | 60       | 50   | 74   | 0.87     | 0.032057  | 39       | 34  | 38   | 69   | 47   | 48       | 56  | 50  | 37  | 54   | 0.68     | 0.022598 | 55   | 0.67     | 0.075834 |          |
| 256799_at | At1g77580 | putative 3'-5' xanthine dehydrogenase similar to xanthine dehydrogenase I family protein  | 113  | 173  | 188  | 254 | 235  | 204      | 158  | 231  | 0.69     | 0.016820  | 96       | 114 | 108  | 109  | 108  | 108      | 108 | 107 | 102 | 110  | 0.90     | 0.365759 | 120  | 0.85     | 0.248893 |          |
| 256799_at | At1g77450 | GRAB1-like protein similar to GRAB1 1 no apical meristem (NAM) family protein             | 30   | 43   | 100  | 109 | 81   | 65       | 58   | 85   | 0.68     | 0.330439  | 76       | 71  | 85   | 112  | 83   | 72       | 93  | 93  | 77  | 91   | 0.85     | 0.194810 | 89   | 0.87     | 0.387638 |          |
| 256799_at | At1g77540 | unknown protein similar to GB-AAD414 expressed protein                                    | 286  | 359  | 317  | 387 | 452  | 381      | 321  | 407  | 0.79     | 0.050848  | 371      | 382 | 332  | 555  | 425  | 408      | 475 | 422 | 361 | 457  | 0.79     | 0.044399 | 463  | 0.78     | 0.106786 |          |
| 256799_at | At1g77490 | thiolaldehyde-bound ascorbate peroxidase / L-ascorbate peroxidase, thiolaldehyde-bound    | 181  | 322  | 260  | 235 | 293  | 209      | 254  | 246  | 1.04     | 0.883653  | 242      | 261 | 251  | 340  | 263  | 261      | 284 | 260 | 251 | 282  | 0.89     | 0.190139 | 288  | 0.87     | 0.236199 |          |
| 256799_at | At1g77490 | hypophosphatase isozyme, putative sim hydrolase, alpha-beta-hydrolase fold family protein | 134  | 175  | 177  | 201 | 222  | 180      | 152  | 205  | 0.80     | 0.218254  | 136      | 161 | 174  | 222  | 208  | 239      | 229 | 173 | 233 | 274  | 0.90     | 0.050557 | 254  | 0.75     | 0.030710 |          |
| 256799_at | At1g77655 | unknown protein ; supported by full-length expressed protein                              | 90   | 97   | 129  | 114 | 135  | 117      | 105  | 122  | 0.86     | 0.288258  | 73       | 56  | 96   | 78   | 84   | 68       | 73  | 84  | 75  | 77   | 0.97     | 0.812624 | 77   | 0.98     | 0.895169 |          |
| 256799_at | At1g77655 | putative aminotransferase similar to α aminotransferase class I and II family or          | 515  | 501  | 514  | 772 | 738  | 677      | 523  | 729  | 0.72     | 0.002148  | 551      | 539 | 611  | 903  | 679  | 619      | 703 | 689 | 567 | 719  | 0.79     | 0.062488 | 734  | 0.77     | 0.135652 |          |
| 256799_at | At1g77570 | outative DNA-binding protein similar to hsp shock transcription factor family arc         | 87   | 86   | 119  | 103 | 143  | 141      | 114  | 117  | 0.77     | 0.087424  | 76       | 80  | 103  | 143  | 107  | 98       | 85  | 93  | 86  | 107  | 0.81     | 0.181458 | 116  | 0.74     | 0.140354 |          |
| 256799_at | At1g77570 | putative 30S ribosomal protein beta subunit C (PBC2)                                      | 648  | 765  | 637  | 795 | 657  | 605      | 751  | 677  | 0.77     | 0.050848  | 371      | 382 | 332  | 555  | 425  | 408      | 475 | 422 | 361 | 457  | 0.79     | 0.044399 | 463  | 0.78     | 0.106786 |          |
| 256799_at | At1g7     |                                                                                           |      |      |      |     |      |          |      |      |          |           |          |     |      |      |      |          |     |     |     |      |          |          |      |          |          |          |

|           |           |                                                                                      |      |      |      |      |      |      |      |      |          |          |      |      |      |      |      |      |      |      |        |      |          |          |          |          |          |          |
|-----------|-----------|--------------------------------------------------------------------------------------|------|------|------|------|------|------|------|------|----------|----------|------|------|------|------|------|------|------|------|--------|------|----------|----------|----------|----------|----------|----------|
| 256969_at | At1g68920 | putative DNA-binding protein similar to basic helix-loop-helix (bHLH) family prot    | 165  | 213  | 229  | 232  | 264  | 196  | 202  | 231  | 0.88     | 0.354755 | 201  | 227  | 201  | 294  | 239  | 209  | 259  | 245  | 210    | 249  | 0.84     | 0.086862 | 247      | 0.85     | 0.228000 |          |
| 256968_at | At1g68930 | hyothetical protein similar to hyothet pentadecanoyl-coenzyme (PPR) repeat-contains  | 22   | 33   | 32   | 34   | 47   | 31   | 29   | 37   | 0.78     | 0.244949 | 26   | 23   | 26   | 27   | 24   | 23   | 27   | 24   | 25     | 25   | 0.99     | 0.855792 | 25       | 1.00     | 0.995274 |          |
| 256969_at | At1g68940 | hyothetical protein predicted by geneF armadillo/beta-catenin reveal protein-rel     | 53   | 79   | 83   | 64   | 72   | 62   | 71   | 66   | 1.00     | 0.620978 | 71   | 64   | 73   | 56   | 48   | 59   | 63   | 62   | 69     | 58   | 1.21     | 0.032325 | 54       | 1.28     | 0.026289 |          |
| 256970_at | At1g68960 | unknown protein                                                                      | 46   | 67   | 69   | 67   | 60   | 57   | 67   | 0.80 | 0.211244 | 54       | 63   | 61   | 59   | 64   | 54   | 61   | 63   | 29   | 54     | 59   | 0.95     | 0.562915 | 59       | 1.00     | 0.960591 |          |
| 256972_at | At1g68990 | DNA-directed RNA polymerase identical: DNA-directed RNA polymerase, mtchoc           | 118  | 174  | 188  | 211  | 218  | 193  | 160  | 207  | 0.77     | 0.104223 | 129  | 108  | 140  | 155  | 150  | 114  | 136  | 131  | 125    | 137  | 0.91     | 0.358882 | 140      | 0.90     | 0.423875 |          |
| 256941_at | At1g69020 | putative protease similar to protease I1 prolyl oligopeptidase family protein        | 100  | 126  | 141  | 148  | 154  | 134  | 122  | 145  | 0.84     | 0.157157 | 114  | 105  | 123  | 145  | 118  | 114  | 148  | 139  | 114    | 133  | 0.86     | 0.116488 | 125      | 0.91     | 0.360748 |          |
| 256942_at | At1g69030 | hyothetical protein predicted by geneS BSD domain-containing protein                 | 195  | 230  | 222  | 310  | 300  | 249  | 216  | 286  | 0.75     | 0.031696 | 315  | 310  | 307  | 475  | 351  | 311  | 350  | 289  | 413071 | 386  | 0.80     | 0.167690 | 0.80     | 0.167690 |          |          |
| 256943_at | At1g68980 | putative menaquinone biosynthesis pr menaquinone biosynthesis protein-relat          | 36   | 54   | 54   | 54   | 52   | 51   | 54   | 52   | 0.84     | 0.136002 | 52   | 22   | 26   | 31   | 25   | 30   | 35   | 27   | 30     | 35   | 0.85     | 0.173780 | 30       | 0.87     | 0.432827 |          |
| 256944_at | At1g68910 | unknown protein                                                                      | 36   | 45   | 54   | 56   | 56   | 46   | 45   | 53   | 0.86     | 0.292407 | 24   | 34   | 32   | 46   | 31   | 46   | 35   | 30   | 31     | 46   | 0.38     | 0.713230 | 37       | 0.81     | 0.277655 |          |
| 256945_at | At1g69010 | outative DNA-binding protein predictic basic helix-loop-helix (bHLH) family prot     | 166  | 225  | 220  | 271  | 278  | 228  | 204  | 259  | 0.77     | 0.087995 | 245  | 297  | 289  | 429  | 316  | 317  | 280  | 282  | 277    | 325  | 0.85     | 0.259811 | 354      | 0.78     | 0.132663 |          |
| 256946_at | At1g55350 | n-calcaion-1 laore subunit, putative simi calpain-type cysteine protease family      | 247  | 386  | 413  | 415  | 483  | 359  | 349  | 419  | 0.83     | 0.325699 | 213  | 185  | 224  | 294  | 243  | 191  | 245  | 231  | 207    | 241  | 0.86     | 0.210564 | 242      | 0.86     | 0.336338 |          |
| 256947_at | At1g55320 | acetyl-CoA synthetase, outative simila acyl-activating enzyme 18 (AAE18) // e        | 173  | 118  | 218  | 261  | 283  | 203  | 243  | 264  | 0.80     | 0.101330 | 140  | 118  | 80   | 155  | 195  | 164  | 141  | 167  | 131    | 138  | 164      | 0.84     | 0.121848 | 167      | 0.83     | 0.196282 |
| 256948_at | At1g55315 | hyothetical protein predicted by geneR hyothetical protein predicted by geneM        | 83   | 54   | 83   | 88   | 83   | 75   | 85   | 0.90 | 0.051321 | 77       | 59   | 80   | 89   | 75   | 70   | 82   | 100  | 72   | 85     | 85   | 0.85     | 0.184844 | 78       | 0.93     | 0.528931 |          |
| 256949_at | At1g55300 | Serine/arginine-rich protein, putative si TATA-binding protein-associated factor     | 112  | 152  | 158  | 163  | 190  | 147  | 141  | 167  | 0.84     | 0.242413 | 173  | 165  | 173  | 231  | 187  | 174  | 176  | 168  | 171    | 187  | 0.91     | 0.315166 | 197      | 0.86     | 0.200880 |          |
| 256950_at | At1g55290 | leucotahocvanidin diogenase 2, pu oxidoreductase, ZOG-Fe(II) oxvasease I             | 49   | 58   | 66   | 64   | 67   | 57   | 58   | 63   | 0.92     | 0.426861 | 53   | 57   | 64   | 58   | 52   | 57   | 64   | 56   | 58     | 57   | 1.01     | 0.856360 | 56       | 1.05     | 0.541413 |          |
| 256951_at | At1g55280 | unknown protein                                                                      | 53   | 69   | 67   | 76   | 76   | 66   | 63   | 73   | 0.86     | 0.167505 | 50   | 49   | 64   | 84   | 62   | 69   | 63   | 55   | 68     | 68   | 0.81     | 0.097822 | 69       | 0.79     | 0.185350 |          |
| 256952_at | At1g55250 | expressed protein                                                                    | 67   | 96   | 103  | 111  | 115  | 96   | 88   | 107  | 0.82     | 0.203074 | 48   | 46   | 52   | 57   | 51   | 48   | 59   | 55   | 49     | 54   | 0.90     | 0.096082 | 52       | 0.93     | 0.300703 |          |
| 256953_at | At1g55240 | unknown protein                                                                      | 27   | 31   | 50   | 36   | 50   | 47   | 36   | 45   | 0.81     | 0.366786 | 25   | 29   | 28   | 23   | 21   | 20   | 23   | 26   | 27     | 23   | 1.19     | 0.033781 | 22       | 1.26     | 0.023612 |          |
| 256954_at | At1g55220 | hyothetical protein predicted by geneR hyothetical protein                           | 22   | 15   | 18   | 12   | 19   | 18   | 18   | 16   | 1.14     | 0.488489 | 10   | 11   | 12   | 11   | 7    | 11   | 18   | 12   | 11     | 12   | 0.92     | 0.712115 | 10       | 1.11     | 0.489678 |          |
| 256955_at | At1g55210 | unknown protein                                                                      | 626  | 692  | 516  | 912  | 1076 | 859  | 578  | 949  | 0.61     | 0.012815 | 489  | 523  | 519  | 1102 | 813  | 684  | 606  | 555  | 510    | 752  | 0.68     | 0.113763 | 866      | 0.59     | 0.045788 |          |
| 256956_at | At1g55200 | protein kinase, putative contains Pfam protein kinase family protein                 | 48   | 85   | 63   | 119  | 145  | 97   | 66   | 120  | 0.54     | 0.035681 | 44   | 37   | 44   | 61   | 61   | 52   | 47   | 45   | 41     | 53   | 0.77     | 0.047721 | 58       | 0.71     | 0.011511 |          |
| 256957_at | At1g55180 | phospholipase D alpha, outative simila phospholipase D, putative (PLDPESILO          | 26   | 28   | 35   | 30   | 27   | 30   | 29   | 1.02 | 0.848151 | 24       | 24   | 29   | 30   | 23   | 20   | 32   | 25   | 26   | 26     | 0.98 | 0.898787 | 24       | 1.05     | 0.747872 |          |          |
| 256958_at | At1g55370 | hyothetical protein predicted by geneR expressed protein                             | 54   | 67   | 127  | 82   | 101  | 114  | 83   | 99   | 0.84     | 0.545253 | 35   | 49   | 43   | 48   | 37   | 36   | 72   | 52   | 42     | 49   | 0.87     | 0.503523 | 40       | 1.05     | 0.705981 |          |
| 256959_at | At1g55170 | hyothetical protein contains similiarly i expressed protein                          | 150  | 193  | 181  | 232  | 254  | 202  | 175  | 229  | 0.76     | 0.049384 | 164  | 166  | 181  | 273  | 204  | 209  | 184  | 167  | 170    | 208  | 0.82     | 0.177892 | 229      | 0.74     | 0.063852 |          |
| 256960_at | At1g55260 | unknown protein ; supported by full-len proteinase inhibitor/seed storage/lipid tran | 432  | 517  | 467  | 630  | 659  | 534  | 472  | 608  | 0.78     | 0.039544 | 190  | 164  | 265  | 674  | 570  | 442  | 360  | 372  | 206    | 483  | 0.43     | 0.016304 | 582      | 0.37     | 0.008547 |          |
| 256961_at | At1g55265 | Expressed protein ; supported by full-le expressed protein                           | 122  | 121  | 136  | 185  | 172  | 159  | 126  | 172  | 0.74     | 0.007108 | 98   | 99   | 117  | 231  | 165  | 146  | 163  | 155  | 105    | 176  | 0.59     | 0.013568 | 167      | 0.56     | 0.030434 |          |
| 256962_at | At1g55255 | Expressed protein ; supported by full-le zinc finger (C3HC4-type PRG1 finger) fa     | 202  | 268  | 236  | 236  | 275  | 239  | 235  | 250  | 0.94     | 0.552997 | 210  | 176  | 222  | 279  | 240  | 180  | 270  | 249  | 203    | 244  | 0.83     | 0.155788 | 233      | 0.87     | 0.383454 |          |
| 256963_at | At1g55190 | hyothetical protein predicted by geneR overnated bar acceptor (PRA1) family o        | 165  | 234  | 215  | 238  | 265  | 202  | 175  | 229  | 0.76     | 0.031014 | 178  | 208  | 199  | 285  | 212  | 196  | 197  | 178  | 195    | 214  | 0.91     | 0.491210 | 231      | 0.84     | 0.274172 |          |
| 256964_at | At1g55330 | unknown protein ; supported by full-len arabinogalactan-protein (AGP21)              | 1522 | 1141 | 1244 | 970  | 1363 | 851  | 1302 | 1061 | 1.23     | 0.278437 | 1957 | 2019 | 1976 | 2039 | 1668 | 1505 | 1730 | 1680 | 1884   | 1725 | 1.15     | 0.068447 | 1738     | 1.14     | 0.196310 |          |
| 256965_at | At1g55170 | hyothetical protein ; supported by cDNA: expressed protein                           | 389  | 389  | 379  | 408  | 458  | 381  | 355  | 415  | 0.86     | 0.178387 | 398  | 483  | 438  | 586  | 478  | 437  | 457  | 437  | 398    | 410  | 0.91     | 0.355129 | 498      | 0.87     | 0.296951 |          |
| 256966_at | At1g55310 | unknown protein ; supported by cDNA: SC35-like splicing factor, 33 kb (SCL33         | 347  | 336  | 513  | 496  | 625  | 458  | 432  | 526  | 0.82     | 0.247998 | 553  | 586  | 567  | 778  | 648  | 634  | 707  | 666  | 569    | 686  | 0.83     | 0.015961 | 686      | 0.83     | 0.066012 |          |
| 256967_at | At1g55270 | unknown protein ; supported by cDNA: kelch repeat-containing F-box family pr         | 301  | 361  | 377  | 547  | 572  | 470  | 346  | 530  | 0.65     | 0.008885 | 195  | 192  | 208  | 351  | 284  | 250  | 272  | 246  | 199    | 280  | 0.71     | 0.018254 | 295      | 0.67     | 0.032411 |          |
| 256968_at | At1g52390 | hyothetical protein predicted by geneR hyothetical protein                           | 25   | 28   | 40   | 31   | 41   | 33   | 31   | 35   | 0.88     | 0.515444 | 14   | 15   | 19   | 21   | 15   | 16   | 19   | 15   | 16     | 17   | 0.94     | 0.596128 | 17       | 0.93     | 0.631108 |          |
| 256969_at | At1g52340 | short chain alcohol dehydrogenase, o, short-chain dehydrogenase/reductase (S         | 264  | 352  | 328  | 467  | 435  | 336  | 315  | 410  | 0.77     | 0.105740 | 270  | 308  | 372  | 598  | 432  | 335  | 315  | 317  | 399    | 0.79 | 0.319098 | 465      | 0.70     | 0.170428 |          |          |
| 256970_at | At1g52310 | protein kinase, outative similar to G17: protein kinase family protein / C-vio lec   | 432  | 538  | 454  | 566  | 643  | 514  | 475  | 574  | 0.83     | 0.115039 | 542  | 476  | 546  | 695  | 672  | 516  | 624  | 623  | 521    | 626  | 0.83     | 0.056680 | 628      | 0.83     | 0.155522 |          |
| 256971_at | At1g52290 | protein kinase, outative similar to G17: protein kinase family protein               | 184  | 173  | 185  | 201  | 202  | 165  | 181  | 189  | 0.96     | 0.545190 | 233  | 179  | 228  | 198  | 178  | 144  | 153  | 160  | 213    | 167  | 1.28     | 0.041862 | 173      | 1.23     | 0.165113 |          |
| 256972_at | At1g52260 | protein disulfide isomerase precursor ; thiorodion family protein                    | 49   | 69   | 76   | 74   | 82   | 52   | 61   | 69   | 0.88     | 0.537929 | 60   | 54   | 68   | 68   | 62   | 62   | 56   | 61   | 62     | 69   | 0.99     | 0.853109 | 64       | 0.96     | 0.573620 |          |
| 256973_at | At1g52360 | coatmer complex subunit, putative si coatmer protein complex, subunit beta           | 297  | 363  | 411  | 415  | 457  | 383  | 356  | 405  | 0.59     | 0.121444 | 148  | 123  | 171  | 173  | 158  | 159  | 143  | 148  | 156    | 163  | 0.85     | 0.625102 | 153      | 0.87     | 0.839531 |          |
| 256973_at | At1g52380 | unknown protein predicted by full-len: RNA-binding protein 1 domain-contains         | 422  | 469  | 427  | 526  | 535  | 428  | 439  | 486  | 0.89     | 0.203601 | 407  | 378  | 413  | 510  | 425  | 377  | 433  | 409  | 399    | 431  | 0.93     | 0.342477 | 437      | 0.91     | 0.400810 |          |
| 256940_at | At1g52400 | beta-glucosidase, outative identical to alcovosid protein family 1 protein / beta    | 4966 | 4984 | 5326 | 6002 | 6126 | 5784 | 5002 | 5970 | 0.84     | 0.009589 | 3848 | 3892 | 4354 | 5017 | 4620 | 3988 | 5569 | 5556 | 4031   | 4950 | 0.81     | 0.069388 | 4542     | 0.89     | 0.206797 |          |
| 256960_at | At1g52410 | mvosin-like protein contains Pfam orof caldesmon-related                             | 1385 | 1393 | 1526 | 2244 | 2327 | 2055 | 1435 | 2207 | 0.65     | 0.001198 | 1531 | 1210 | 1701 | 1917 | 2073 | 1744 | 2141 | 2080 | 1481   | 1991 | 0.74     | 0.011563 | 1912     | 0.77     | 0.068977 |          |
| 256910_at | At1g52320 | bZIP protein, outative similar to G1600 protein                                      | 117  | 171  | 167  | 206  | 145  | 152  | 173  | 0.88 | 0.462844 | 111      | 108  | 126  | 155  | 139  | 120  | 133  | 112  | 115  | 132    | 0.87 | 0.163353 | 138      | 0.83     | 0.111533 |          |          |
| 256911_at | At1g52310 | GTP-binding protein R457D, putative : Ras-related GTP-binding protein, putath        | 433  | 642  | 550  | 698  | 734  | 580  | 671  | 0.86 | 0.185339 | 724      | 808  | 879  | 864  | 879  | 864  | 879  | 864  | 879  | 864    | 879  | 0.86     | 0.145141 | 853      | 0.88     | 0.333633 |          |
| 256912_at | At1g52300 | 60S ribosomal protein L37, putative si 60S ribosomal protein L37 (RPL37B)            | 4538 | 5372 | 5166 | 5166 | 5597 | 4944 | 5026 | 5235 | 0.96     | 0.542852 | 5034 | 4951 | 5152 | 5919 | 5306 | 4771 | 5579 | 5424 | 5046   | 5400 | 0.93     | 0.212721 | 5332     | 0.95     | 0.442646 |          |
| 256913_at | At1g48010 | hyothetical protein predicted by geneR invertase/pectin methyltransferase inhibitor  | 35   | 37   | 41   | 36   | 40   | 31   | 38   | 36   | 1.05     | 0.597625 | 111  | 102  | 103  | 30   | 27   | 27   | 32   | 31   | 105    | 29   | 3.57     | 0.000000 | 28       | 3.78     | 0.000017 |          |
| 256914_at | At1g47990 | diogenase, outative similar to diogen obberlein-Z oxidase, outative i GA2-oo         | 90   | 113  | 168  | 120  | 162  | 107  | 124  | 130  | 0.96     | 0.585189 | 61   | 68   | 62   | 118  | 97   | 72   | 77   | 69   | 64     | 87   | 0.74     | 0.117173 | 96       | 0.67     | 0.080004 |          |
| 256915_at | At1g47980 | desiccation-related protein, putative si invertase                                   | 45   | 60   | 57   | 89   | 56   | 54   | 55   | 71   | 0.74     | 0.346134 | 44   | 43   | 49   | 46   | 47   | 42   | 49   | 45   | 44     | 54   | 1.02     | 0.807329 | 43       | 1.04     | 0.62685  |          |

|             |           |                                                                                   |     |      |      |      |      |     |      |      |      |          |      |      |     |      |      |      |      |      |      |      |      |          |      |      |          |
|-------------|-----------|-----------------------------------------------------------------------------------|-----|------|------|------|------|-----|------|------|------|----------|------|------|-----|------|------|------|------|------|------|------|------|----------|------|------|----------|
| 259601_s_at | At1g35280 | CACTA-element transposase, putative CACTA-like transposase family (Tnp2/E         | 90  | 96   | 117  | 130  | 144  | 117 | 101  | 131  | 0.77 | 0.057148 | 86   | 67   | 88  | 114  | 110  | 74   | 139  | 125  | 80   | 112  | 0.71 | 0.080960 | 99   | 0.81 | 0.258162 |
| 259574_at   | At1g35310 | hyothetical protein                                                               | 25  | 51   | 38   | 46   | 44   | 31  | 38   | 40   | 0.95 | 0.838780 | 20   | 22   | 24  | 36   | 44   | 32   | 23   | 26   | 22   | 32   | 0.68 | 0.084410 | 37   | 0.59 | 0.016270 |
| 259575_at   | At1g35320 | unknown protein                                                                   | 18  | 24   | 31   | 27   | 24   | 26  | 24   | 26   | 0.94 | 0.729381 | 17   | 26   | 27  | 21   | 14   | 17   | 22   | 20   | 23   | 19   | 1.22 | 0.227892 | 17   | 1.34 | 0.208005 |
| 259576_at   | At1g35330 | zinc finger protein, putative conserved C3H4-Cys RING finger) fa                  | 27  | 34   | 37   | 31   | 31   | 31  | 32   | 32   | 0.93 | 0.704040 | 31   | 21   | 28  | 25   | 30   | 27   | 26   | 28   | 27   | 26   | 0.93 | 0.330989 | 26   | 0.80 | 0.036918 |
| 259577_at   | At1g35340 | unknown protein                                                                   | 148 | 271  | 222  | 259  | 291  | 236 | 214  | 262  | 0.82 | 0.285739 | 229  | 261  | 262 | 398  | 314  | 286  | 282  | 274  | 251  | 311  | 0.81 | 0.103120 | 333  | 0.75 | 0.080511 |
| 259546_at   | At1g35350 | unknown protein                                                                   | 30  | 34   | 46   | 52   | 50   | 40  | 37   | 47   | 0.78 | 0.158135 | 31   | 31   | 36  | 35   | 27   | 28   | 28   | 30   | 31   | 30   | 1.03 | 0.768445 | 30   | 1.02 | 0.882400 |
| 259547_at   | At1g35370 | qvav1Y3 element polyprotein, putative gyrase-like retrotransposase family         | 32  | 25   | 49   | 39   | 44   | 41  | 35   | 41   | 0.86 | 0.447284 | 22   | 21   | 33  | 23   | 25   | 30   | 26   | 26   | 26   | 26   | 0.96 | 0.746420 | 26   | 0.96 | 0.818696 |
| 259548_at   | At1g35260 | hyothetical protein similar to nemomyd family protein                             | 15  | 18   | 17   | 15   | 15   | 15  | 15   | 16   | 1.12 | 0.135040 | 16   | 17   | 16  | 12   | 16   | 12   | 14   | 16   | 17   | 15   | 0.75 | 0.633758 | 16   | 0.75 | 0.065116 |
| 259549_at   | At1g35290 | unknown protein : supported by full-length thioesterase family protein            | 15  | 34   | 36   | 38   | 38   | 37  | 35   | 38   | 0.92 | 0.033446 | 32   | 31   | 34  | 42   | 33   | 37   | 44   | 29   | 32   | 37   | 0.87 | 0.241437 | 37   | 0.86 | 0.125190 |
| 259550_at   | At1g35230 | unknown protein : supported by full-l arabinogalactan-protein (AGPS)              | 19  | 18   | 27   | 21   | 21   | 23  | 21   | 22   | 0.98 | 0.859476 | 22   | 30   | 29  | 18   | 17   | 16   | 18   | 27   | 17   | 15   | 1.57 | 0.002125 | 17   | 1.59 | 0.017978 |
| 259551_at   | At1g21190 | hyothetical protein                                                               | 241 | 323  | 313  | 378  | 405  | 358 | 292  | 381  | 0.77 | 0.039320 | 357  | 456  | 480 | 643  | 477  | 468  | 406  | 394  | 431  | 477  | 0.90 | 0.504302 | 529  | 0.81 | 0.224987 |
| 259552_at   | At1g21320 | hyothetical protein                                                               | 24  | 37   | 37   | 33   | 36   | 35  | 29   | 33   | 0.83 | 0.193224 | 21   | 20   | 28  | 27   | 23   | 22   | 26   | 23   | 24   | 24   | 0.86 | 0.716133 | 23   | 0.97 | 0.834806 |
| 259553_s_at | At1g21310 | hyothetical protein                                                               | 29  | 37   | 28   | 31   | 33   | 34  | 31   | 33   | 0.86 | 0.174035 | 23   | 24   | 29  | 30   | 26   | 22   | 38   | 33   | 23   | 25   | 0.88 | 0.434925 | 30   | 0.86 | 0.442428 |
| 259554_at   | At1g21220 | hyothetical protein                                                               | 40  | 33   | 46   | 45   | 51   | 40  | 39   | 45   | 0.87 | 0.294153 | 24   | 22   | 31  | 23   | 26   | 20   | 33   | 29   | 26   | 26   | 0.99 | 0.963804 | 23   | 1.13 | 0.382930 |
| 259555_at   | At1g21290 | hyothetical protein                                                               | 15  | 18   | 18   | 16   | 16   | 13  | 17   | 15   | 1.13 | 0.232530 | 17   | 19   | 23  | 17   | 12   | 15   | 17   | 16   | 20   | 15   | 1.27 | 0.041110 | 15   | 1.32 | 0.079057 |
| 259556_at   | At1g21300 | hyothetical protein                                                               | 16  | 15   | 15   | 16   | 18   | 13  | 15   | 16   | 0.98 | 0.857043 | 10   | 16   | 14  | 13   | 9    | 13   | 10   | 13   | 11   | 11   | 1.26 | 0.157245 | 10   | 1.30 | 0.219872 |
| 259557_at   | At1g21210 | hyothetical protein                                                               | 15  | 19   | 22   | 19   | 21   | 17  | 18   | 19   | 0.98 | 0.859300 | 9    | 13   | 19  | 16   | 12   | 13   | 18   | 17   | 14   | 15   | 0.91 | 0.615230 | 14   | 1.00 | 0.994394 |
| 259558_at   | At1g21230 | hyothetical protein                                                               | 10  | 10   | 14   | 21   | 17   | 13  | 11   | 17   | 0.65 | 0.078388 | 5    | 7    | 12  | 6    | 9    | 10   | 8    | 8    | 8    | 8    | 0.98 | 0.937668 | 8    | 0.99 | 0.975411 |
| 259559_at   | At1g21240 | hyothetical protein                                                               | 6   | 6    | 7    | 5    | 8    | 6   | 6    | 6    | 0.95 | 0.736278 | 9    | 8    | 4   | 7    | 6    | 8    | 12   | 5    | 7    | 8    | 0.94 | 0.826194 | 7    | 1.02 | 0.926620 |
| 259560_at   | At1g21270 | hyothetical protein                                                               | 42  | 57   | 59   | 66   | 84   | 56  | 53   | 69   | 0.77 | 0.173949 | 57   | 34   | 55  | 46   | 49   | 52   | 43   | 49   | 48   | 48   | 1.02 | 0.900411 | 49   | 0.99 | 0.954458 |
| 259561_at   | At1g21250 | hyothetical protein : supported by full-well-associated kinase 1 (WAK1)           | 14  | 20   | 22   | 21   | 25   | 22  | 18   | 23   | 0.82 | 0.234280 | 15   | 16   | 16  | 18   | 14   | 20   | 17   | 16   | 17   | 16   | 0.92 | 0.323287 | 17   | 0.96 | 0.590542 |
| 259562_at   | At1g21200 | hyothetical protein : supported by cDN                                            | 60  | 85   | 87   | 100  | 106  | 85  | 77   | 97   | 0.80 | 0.138877 | 56   | 65   | 68  | 100  | 70   | 69   | 78   | 76   | 63   | 79   | 0.80 | 0.095224 | 80   | 0.79 | 0.195431 |
| 259563_s_at | At1g20590 | hyothetical protein                                                               | 234 | 356  | 333  | 321  | 353  | 249 | 307  | 308  | 1.00 | 0.995414 | 266  | 261  | 289 | 362  | 263  | 292  | 268  | 268  | 272  | 291  | 0.94 | 0.501374 | 306  | 0.89 | 0.334567 |
| 259564_at   | At1g20540 | hyothetical protein                                                               | 372 | 514  | 471  | 529  | 574  | 462 | 452  | 522  | 0.87 | 0.259110 | 518  | 507  | 512 | 709  | 551  | 537  | 582  | 545  | 512  | 585  | 0.88 | 0.141761 | 599  | 0.86 | 0.192640 |
| 259565_at   | At1g20530 | hyothetical protein                                                               | 66  | 82   | 85   | 88   | 118  | 95  | 78   | 100  | 0.77 | 0.105354 | 68   | 68   | 89  | 105  | 79   | 69   | 95   | 97   | 75   | 89   | 0.84 | 0.216389 | 84   | 0.89 | 0.511386 |
| 259566_at   | At1g20520 | hyothetical protein                                                               | 54  | 67   | 76   | 70   | 72   | 69  | 66   | 70   | 0.94 | 0.536741 | 55   | 43   | 62  | 61   | 43   | 50   | 63   | 53   | 53   | 54   | 0.99 | 0.935370 | 51   | 1.04 | 0.805576 |
| 259567_at   | At1g20500 | hyothetical protein                                                               | 15  | 19   | 20   | 22   | 25   | 20  | 18   | 22   | 0.81 | 0.104041 | 16   | 14   | 16  | 18   | 19   | 16   | 17   | 16   | 15   | 17   | 0.90 | 0.142310 | 18   | 0.87 | 0.139244 |
| 259568_at   | At1g20490 | hyothetical protein                                                               | 21  | 22   | 28   | 27   | 25   | 29  | 23   | 27   | 0.87 | 0.244131 | 15   | 13   | 24  | 17   | 17   | 17   | 17   | 15   | 17   | 17   | 1.04 | 0.807566 | 17   | 1.02 | 0.942095 |
| 259569_at   | At1g20480 | hyothetical protein                                                               | 53  | 67   | 68   | 74   | 79   | 67  | 65   | 73   | 0.88 | 0.284152 | 52   | 51   | 54  | 72   | 66   | 65   | 58   | 55   | 52   | 63   | 0.82 | 0.028882 | 68   | 0.77 | 0.002322 |
| 259570_at   | At1g20440 | hyothetical protein                                                               | 67  | 80   | 168  | 127  | 125  | 108 | 112  | 126  | 0.86 | 0.121110 | 68   | 78   | 108 | 156  | 108  | 108  | 108  | 108  | 108  | 108  | 0.75 | 0.039592 | 80   | 0.69 | 0.021067 |
| 259571_at   | At1g20410 | hyothetical protein                                                               | 145 | 175  | 174  | 200  | 234  | 177 | 165  | 204  | 0.81 | 0.113578 | 176  | 161  | 179 | 252  | 213  | 177  | 192  | 185  | 172  | 204  | 0.84 | 0.143276 | 215  | 0.80 | 0.138710 |
| 259572_at   | At1g20400 | hyothetical protein                                                               | 61  | 59   | 71   | 71   | 90   | 74  | 64   | 78   | 0.81 | 0.104765 | 57   | 55   | 70  | 48   | 61   | 59   | 64   | 67   | 61   | 60   | 1.02 | 0.858993 | 56   | 1.09 | 0.476157 |
| 259573_at   | At1g20390 | hyothetical protein                                                               | 25  | 27   | 29   | 28   | 31   | 25  | 27   | 28   | 0.96 | 0.617700 | 29   | 26   | 31  | 25   | 26   | 29   | 25   | 25   | 29   | 27   | 1.07 | 0.276750 | 27   | 1.07 | 0.380402 |
| 259574_at   | At1g20380 | put 1 protein, putative similar to axl 1 expressed protein                        | 232 | 304  | 292  | 294  | 333  | 269 | 276  | 299  | 0.92 | 0.491383 | 289  | 203  | 279 | 304  | 266  | 219  | 253  | 253  | 257  | 259  | 0.99 | 0.949516 | 263  | 0.98 | 0.265962 |
| 259540_at   | At1g20640 | nodule inception protein, putative small RWR-RK domain-containing protein         | 97  | 129  | 175  | 145  | 141  | 117 | 134  | 134  | 0.99 | 0.976526 | 121  | 115  | 141 | 134  | 105  | 85   | 115  | 113  | 126  | 111  | 1.14 | 0.254794 | 108  | 1.16 | 0.341585 |
| 259541_at   | At1g20650 | protein kinase, putative similar to orole protein kinase family protein           | 393 | 622  | 846  | 552  | 612  | 404 | 620  | 523  | 1.19 | 0.536376 | 536  | 624  | 527 | 723  | 595  | 581  | 728  | 757  | 562  | 677  | 0.83 | 0.077473 | 633  | 0.89 | 0.264117 |
| 259542_at   | At1g20575 | Expressed protein : supported by full-le dolichyl-phosphate beta-D-mannosyltr     | 291 | 340  | 402  | 390  | 414  | 336 | 344  | 380  | 0.91 | 0.417000 | 314  | 372  | 344 | 467  | 352  | 349  | 348  | 318  | 343  | 367  | 0.94 | 0.548211 | 360  | 0.88 | 0.332937 |
| 259543_at   | At1g20580 | hyothetical protein : supported by full-small nuclear ribonucleoprotein, putative | 633 | 696  | 655  | 745  | 832  | 628 | 773  | 851  | 0.76 | 0.279593 | 842  | 869  | 846 | 1126 | 882  | 821  | 924  | 877  | 819  | 926  | 0.85 | 0.039592 | 943  | 0.87 | 0.265962 |
| 259544_at   | At1g20620 | hyothetical protein : supported by full- cathepsin 3 (SEN2)                       | 985 | 1566 | 1499 | 1028 | 1350 | 666 | 1500 | 1014 | 0.48 | 0.229579 | 1248 | 1580 | 912 | 1548 | 1413 | 1439 | 2709 | 2596 | 1247 | 1941 | 0.64 | 0.144537 | 1467 | 0.85 | 0.327570 |
| 259545_at   | At1g20560 | hyothetical protein : supported by cDN AMP-deendent synthetase and liase f        | 348 | 304  | 312  | 450  | 506  | 366 | 288  | 441  | 0.65 | 0.028405 | 283  | 261  | 305 | 492  | 426  | 346  | 392  | 368  | 283  | 408  | 0.69 | 0.010213 | 421  | 0.67 | 0.035030 |
| 259515_at   | At1g20430 | hyothetical protein : supported by cDN expressed protein                          | 357 | 427  | 475  | 487  | 521  | 456 | 420  | 488  | 0.86 | 0.156796 | 471  | 511  | 528 | 708  | 563  | 543  | 515  | 509  | 503  | 567  | 0.89 | 0.247677 | 605  | 0.83 | 0.137342 |
| 259516_at   | At1g20450 | hyothetical protein : supported by cDN dehydrin (ERD10)                           | 340 | 505  | 467  | 793  | 773  | 685 | 389  | 750  | 0.52 | 0.002171 | 243  | 217  | 211 | 427  | 387  | 431  | 436  | 423  | 423  | 438  | 0.17 | 0.000008 | 415  | 0.54 | 0.000368 |
| 259517_at   | At1g20430 | hyothetical protein : supported by cDN cathepsin 1                                | 631 | 696  | 655  | 745  | 832  | 628 | 773  | 851  | 0.76 | 0.279593 | 842  | 869  | 846 | 1126 | 882  | 821  | 924  | 877  | 819  | 926  | 0.85 | 0.039592 | 943  | 0.87 | 0.265962 |
| 259518_at   | At1g20510 | hyothetical protein : supported by cDN C-omate-CoA liase family protein           | 230 | 205  | 231  | 440  | 584  | 434 | 222  | 486  | 0.46 | 0.006065 | 137  | 125  | 161 | 238  | 286  | 234  | 350  | 327  | 141  | 287  | 0.49 | 0.003823 | 253  | 0.56 | 0.004816 |
| 259519_at   | At1g22270 | hyothetical protein                                                               | 430 | 419  | 427  | 568  | 579  | 455 | 425  | 534  | 0.80 | 0.052132 | 406  | 378  | 450 | 650  | 538  | 458  | 503  | 487  | 411  | 527  | 0.78 | 0.049003 | 549  | 0.75 | 0.082236 |
| 259520_at   | At1g2320  | hyothetical protein                                                               | 50  | 86   | 87   | 106  | 113  | 101 | 74   | 107  | 0.70 | 0.051493 | 54   | 73   | 62  | 122  | 86   | 70   | 110  | 103  | 63   | 88   | 0.64 | 0.034867 | 92   | 0.68 | 0.147220 |
| 259521_at   | At1g2410  | ATP-deendent Cl <sub>2</sub> olease rothelytic                                    | 597 | 657  | 680  | 657  | 793  | 608 | 651  | 688  | 0.80 | 0.145119 | 629  | 692  | 688 | 811  | 724  | 745  | 701  | 683  | 787  | 804  | 0.94 | 0.094713 | 867  | 0.80 | 0.075411 |
| 259522_at   | At1g21490 | hyothetical protein                                                               | 16  | 22   | 24   | 24   | 25   | 21  | 21   | 23   | 0.89 | 0.383728 | 18   | 20   | 22  | 24   | 18   | 20   | 25   | 19   | 20   | 21   | 0.95 | 0.619643 | 21   | 0.98 | 0.863741 |
| 259523_at   | At1g21500 | hyothetical protein                                                               | 152 | 185  | 164  | 230  | 226  | 203 | 167  | 220  | 0.76 | 0.014645 | 143  | 120  | 158 | 267  | 200  | 177  | 213  | 203  | 140  | 212  | 0.66 | 0.016255 | 215  | 0.65 | 0.064506 |
| 259524_at   | At1g21550 | hyothetical protein                                                               | 93  | 110  | 125  | 147  |      |     |      |      |      |          |      |      |     |      |      |      |      |      |      |      |      |          |      |      |          |

|             |           |                                                                                     |      |      |      |      |      |      |      |      |          |          |      |      |      |      |      |      |      |      |      |      |          |          |      |          |          |
|-------------|-----------|-------------------------------------------------------------------------------------|------|------|------|------|------|------|------|------|----------|----------|------|------|------|------|------|------|------|------|------|------|----------|----------|------|----------|----------|
| 250454_at   | At1g44050 | unknown protein similar to hypothetical DC1 domain-containing protein               | 32   | 20   | 23   | 21   | 22   | 26   | 25   | 23   | 1.09     | 0.631956 | 17   | 16   | 20   | 16   | 14   | 18   | 19   | 18   | 18   | 17   | 1.03     | 0.731183 | 16   | 1.09     | 0.459556 |
| 250455_x_at | At1g44030 | unknown protein                                                                     | 41   | 42   | 57   | 56   | 60   | 44   | 47   | 54   | 0.87     | 0.381628 | 31   | 35   | 41   | 37   | 41   | 36   | 38   | 35   | 36   | 37   | 0.96     | 0.534582 | 38   | 0.95     | 0.556754 |
| 250456_s_at | At1g43995 | unknown protein similar to putative non-cyelic-like retrotransposon family          | 45   | 63   | 68   | 67   | 83   | 68   | 59   | 73   | 0.81     | 0.190307 | 33   | 35   | 39   | 43   | 44   | 42   | 43   | 41   | 36   | 43   | 0.84     | 0.003488 | 43   | 0.84     | 0.020415 |
| 250457_at   | At1g44005 | 150 kDa response factor 1, putative simli                                           | 13   | 12   | 10   | 13   | 14   | 12   | 13   | 13   | 1.00     | 0.980082 | 9    | 9    | 10   | 9    | 10   | 9    | 10   | 9    | 10   | 9    | 1.00     | 0.099018 | 9    | 1.00     | 0.040842 |
| 250458_at   | At1g44085 | divicine-rich protein, putative similar to glypinc-rich protein                     | 3    | 37   | 45   | 42   | 47   | 51   | 38   | 47   | 0.81     | 0.119135 | 27   | 32   | 32   | 33   | 33   | 36   | 28   | 30   | 31   | 33   | 0.92     | 0.423547 | 32   | 0.95     | 0.625684 |
| 250459_at   | At1g44070 | En/Spm-like transposon protein, putati                                              | 29   | 33   | 33   | 31   | 35   | 31   | 28   | 32   | 0.85     | 0.242060 | 19   | 15   | 45   | 21   | 19   | 18   | 22   | 19   | 26   | 20   | 1.32     | 0.374566 | 20   | 1.35     | 0.496780 |
| 250460_at   | At1g44000 | unknown protein : supported by cDNA: expressed protein                              | 293  | 432  | 364  | 423  | 406  | 365  | 395  | 402  | 0.507816 | 325      | 392  | 410  | 631  | 426  | 387  | 455  | 460  | 376  | 472  | 0.80 | 0.153376 | 481      | 0.78 | 0.256394 |          |
| 250461_at   | At1g18950 | unknown protein : supported by cDNA: expressed protein (PPR) repeat-contains        | 188  | 2250 | 2805 | 250  | 285  | 257  | 285  | 285  | 0.87     | 0.270453 | 174  | 164  | 177  | 224  | 214  | 203  | 173  | 204  | 173  | 214  | 0.85     | 0.052698 | 204  | 0.84     | 0.046777 |
| 250462_at   | At1g18940 | hypothehtical protein contains similarity I nodulin family protein                  | 51   | 63   | 76   | 80   | 66   | 70   | 64   | 72   | 0.84     | 0.256740 | 41   | 54   | 54   | 57   | 48   | 48   | 58   | 55   | 50   | 53   | 0.93     | 0.454451 | 51   | 0.97     | 0.804090 |
| 250463_at   | At1g18950 | hypothehtical protein predicted by oener aminoacyl-tRNA synthetase family           | 156  | 181  | 216  | 236  | 242  | 204  | 184  | 227  | 0.81     | 0.106650 | 137  | 128  | 154  | 194  | 156  | 133  | 151  | 150  | 140  | 157  | 0.89     | 0.286204 | 161  | 0.87     | 0.336125 |
| 250464_at   | At1g18990 | hypothehtical protein predicted by oener expressed protein                          | 13   | 26   | 18   | 21   | 16   | 18   | 18   | 18   | 0.97     | 0.915539 | 11   | 13   | 15   | 15   | 11   | 12   | 18   | 15   | 14   | 14   | 1.02     | 0.905026 | 13   | 1.15     | 0.552901 |
| 250465_at   | At1g19030 | hypothehtical protein similar to putative r                                         | 19   | 26   | 23   | 24   | 27   | 26   | 23   | 28   | 0.88     | 0.26888  | 18   | 26   | 23   | 19   | 20   | 17   | 22   | 22   | 20   | 20   | 1.02     | 0.838632 | 19   | 1.08     | 0.442439 |
| 250466_at   | At1g19050 | response regulator 5, putative similar t                                            | 94   | 111  | 108  | 157  | 162  | 102  | 179  | 0.57 | 0.001482 | 53       | 55   | 71   | 224  | 152  | 141  | 99   | 108  | 60   | 145  | 0.41 | 0.028847 | 172      | 0.35 | 0.013479 |          |
| 250467_at   | At1g19060 | hypothehtical protein predicted by oener hypothehtical protein                      | 36   | 49   | 52   | 51   | 62   | 55   | 45   | 56   | 0.81     | 0.154370 | 41   | 37   | 42   | 41   | 37   | 36   | 41   | 43   | 40   | 40   | 1.01     | 0.864995 | 38   | 1.05     | 0.411155 |
| 250468_at   | At1g19080 | unknown protein                                                                     | 327  | 420  | 406  | 463  | 507  | 444  | 384  | 471  | 0.82     | 0.064113 | 449  | 434  | 465  | 699  | 544  | 480  | 553  | 475  | 449  | 550  | 0.82     | 0.110888 | 575  | 0.78     | 0.128146 |
| 250469_at   | At1g19100 | hypothehtical protein predicted by oensc ATP-binding domain, ATPase-like domain     | 135  | 169  | 181  | 202  | 236  | 187  | 161  | 208  | 0.77     | 0.079708 | 98   | 86   | 95   | 132  | 121  | 89   | 123  | 112  | 93   | 115  | 0.81     | 0.074542 | 114  | 0.82     | 0.204817 |
| 250470_at   | At1g19110 | unknown protein                                                                     | 432  | 588  | 641  | 661  | 763  | 557  | 554  | 661  | 0.84     | 0.283546 | 499  | 429  | 530  | 606  | 561  | 462  | 671  | 636  | 486  | 587  | 0.83     | 0.105038 | 543  | 0.90     | 0.336665 |
| 250471_at   | At1g19040 | hypothehtical protein contains similarity I hypothehtical protein                   | 14   | 15   | 23   | 19   | 18   | 16   | 17   | 18   | 0.96     | 0.804483 | 25   | 19   | 20   | 17   | 15   | 16   | 25   | 22   | 21   | 19   | 1.13     | 0.430586 | 16   | 1.34     | 0.056790 |
| 250472_at   | At1g18910 | hypothehtical protein contains similarity I zinc finger (C3HC4-type RING finger) fa | 47   | 45   | 51   | 65   | 66   | 57   | 48   | 63   | 0.76     | 0.010192 | 37   | 32   | 49   | 44   | 45   | 39   | 39   | 39   | 39   | 42   | 0.95     | 0.625583 | 43   | 0.92     | 0.546333 |
| 250473_at   | At1g19025 | hypothehtical protein predicted by oensc DNA cross-link repair protein-related      | 40   | 60   | 57   | 54   | 60   | 50   | 49   | 55   | 0.89     | 0.362018 | 47   | 52   | 53   | 61   | 48   | 44   | 64   | 53   | 51   | 54   | 0.94     | 0.554789 | 51   | 0.99     | 0.952596 |
| 250474_at   | At1g19130 | unknown protein: supported by full-lenc expressed protein                           | 317  | 369  | 397  | 439  | 488  | 432  | 381  | 453  | 0.80     | 0.034458 | 420  | 405  | 488  | 658  | 535  | 471  | 467  | 524  | 468  | 535  | 0.87     | 0.205108 | 555  | 0.84     | 0.220384 |
| 250475_at   | At1g19140 | unknown protein : supported by full-lenc expressed protein                          | 372  | 519  | 521  | 542  | 624  | 480  | 471  | 548  | 0.86     | 0.293257 | 359  | 379  | 431  | 512  | 432  | 390  | 360  | 363  | 390  | 412  | 0.95     | 0.610430 | 445  | 0.88     | 0.256769 |
| 250476_at   | At1g19000 | Mvb-related transcription activator, out                                            | 94   | 177  | 137  | 127  | 130  | 99   | 136  | 118  | 1.15     | 0.531134 | 105  | 140  | 125  | 156  | 116  | 125  | 128  | 121  | 123  | 129  | 0.95     | 0.631437 | 132  | 0.93     | 0.591703 |
| 250477_at   | At1g19120 | unknown protein : supported by full-lenc small nuclear ribonucleoprotein, putative  | 686  | 952  | 976  | 1049 | 1150 | 872  | 872  | 1024 | 0.85     | 0.284647 | 916  | 956  | 932  | 1387 | 1016 | 1052 | 1022 | 954  | 935  | 1086 | 0.86     | 0.190849 | 1152 | 0.81     | 0.140813 |
| 250478_at   | At1g18980 | germin, putative similar to germin Gl1: germin-like protein, putative               | 34   | 36   | 40   | 46   | 46   | 42   | 37   | 45   | 0.83     | 0.030417 | 31   | 22   | 37   | 27   | 31   | 31   | 35   | 31   | 30   | 31   | 0.77     | 0.794286 | 30   | 1.01     | 0.934078 |
| 250479_at   | At1g19020 | Expressed protein : supported by full-lenc expressed protein                        | 24   | 19   | 29   | 31   | 30   | 32   | 24   | 31   | 0.77     | 0.078551 | 13   | 13   | 14   | 16   | 12   | 15   | 16   | 17   | 13   | 15   | 0.88     | 0.121253 | 14   | 0.92     | 0.363914 |
| 250480_at   | At1g19010 | hypothehtical protein predicted by oensc expressed protein                          | 81   | 104  | 113  | 104  | 114  | 87   | 99   | 102  | 0.98     | 0.886712 | 109  | 119  | 111  | 148  | 121  | 119  | 116  | 117  | 113  | 124  | 0.91     | 0.222440 | 129  | 0.87     | 0.173507 |
| 250481_at   | At1g18970 | germin, putative similar to germin Gl1: germin, putative similar to germin Gl1-7    | 36   | 45   | 54   | 53   | 61   | 49   | 45   | 54   | 0.83     | 0.206222 | 28   | 28   | 36   | 36   | 32   | 33   | 34   | 29   | 31   | 33   | 0.94     | 0.458832 | 34   | 0.91     | 0.391843 |
| 250482_at   | At1g19090 | receptor-like serine/threonine kinase (SNF-SNAF25 homologous protein, putative /    | 21   | 24   | 26   | 24   | 28   | 30   | 24   | 27   | 0.86     | 0.194263 | 19   | 23   | 19   | 22   | 23   | 19   | 22   | 23   | 20   | 22   | 0.93     | 0.244785 | 22   | 0.93     | 0.347967 |
| 250444_at   | At1g13700 | hypothehtical protein similar to transacti                                          | 194  | 232  | 253  | 238  | 247  | 194  | 232  | 283  | 0.79     | 0.137526 | 194  | 193  | 206  | 246  | 208  | 174  | 208  | 188  | 174  | 208  | 0.88     | 0.251927 | 214  | 0.86     | 0.026398 |
| 250444_at   | At1g13800 | hypothehtical protein similar to putative : pentatricopeptide (PPR) repeat-contains | 44   | 45   | 75   | 75   | 83   | 76   | 55   | 78   | 0.70     | 0.095739 | 32   | 36   | 40   | 42   | 43   | 28   | 40   | 32   | 36   | 37   | 0.98     | 0.856665 | 37   | 0.96     | 0.814478 |
| 250450_at   | At1g13870 | hypothehtical protein predicted by oener expressed protein                          | 142  | 179  | 183  | 184  | 209  | 159  | 168  | 184  | 0.91     | 0.454355 | 188  | 197  | 177  | 305  | 207  | 214  | 228  | 219  | 188  | 235  | 0.80     | 0.090824 | 242  | 0.78     | 0.162894 |
| 250451_at   | At1g13890 | synaptonemal associated protein (SNF-SNAF25 homologous protein, putative /          | 12   | 13   | 18   | 11   | 10   | 14   | 11   | 13   | 1.01     | 0.179105 | 12   | 16   | 16   | 12   | 6    | 6    | 7    | 4    | 15   | 7    | 2.14     | 0.077692 | 8    | 1.92     | 0.043853 |
| 250420_at   | At1g13900 | hypothehtical protein similar to outative c                                         | 419  | 406  | 402  | 561  | 593  | 431  | 376  | 526  | 0.72     | 0.058162 | 265  | 217  | 267  | 409  | 369  | 377  | 310  | 372  | 359  | 469  | 0.70     | 0.005758 | 365  | 0.68     | 0.026575 |
| 250421_at   | At1g13910 | disease resistance protein, putative air                                            | 67   | 88   | 85   | 101  | 114  | 90   | 80   | 101  | 0.79     | 0.088746 | 85   | 82   | 101  | 144  | 108  | 93   | 103  | 89   | 108  | 108  | 0.83     | 0.231049 | 115  | 0.78     | 0.188692 |
| 250422_at   | At1g13810 | unknown protein                                                                     | 129  | 188  | 208  | 229  | 251  | 201  | 175  | 227  | 0.77     | 0.134411 | 172  | 188  | 184  | 259  | 209  | 211  | 167  | 167  | 181  | 203  | 0.89     | 0.388744 | 226  | 0.80     | 0.058132 |
| 250423_at   | At1g13880 | unknown protein similar to putative MYI                                             | 205  | 279  | 283  | 304  | 335  | 240  | 256  | 293  | 0.87     | 0.378159 | 248  | 224  | 246  | 330  | 281  | 233  | 250  | 240  | 239  | 263  | 0.91     | 0.369213 | 275  | 0.87     | 0.300512 |
| 250424_at   | At1g14020 | hypothehtical protein contains similarity                                           | 22   | 24   | 29   | 23   | 31   | 27   | 25   | 27   | 0.90     | 0.032619 | 24   | 24   | 33   | 27   | 26   | 24   | 19   | 22   | 23   | 23   | 1.16     | 0.219819 | 25   | 1.08     | 0.050386 |
| 250425_at   | At1g01460 | 4,5 PIP kinase, putative similar to 4,5                                             | 34   | 41   | 49   | 39   | 51   | 37   | 41   | 42   | 0.98     | 0.890053 | 32   | 33   | 30   | 32   | 27   | 31   | 29   | 33   | 32   | 30   | 1.04     | 0.472924 | 30   | 1.06     | 0.346025 |
| 250426_at   | At1g01470 | hypothehtical protein contains similarity I                                         | 124  | 129  | 249  | 260  | 170  | 179  | 167  | 203  | 0.82     | 0.510518 | 103  | 79   | 112  | 97   | 90   | 103  | 114  | 111  | 98   | 103  | 0.95     | 0.610885 | 97   | 1.01     | 0.900374 |
| 250427_at   | At1g01530 | MADS-box transcription factor, putative                                             | 13   | 16   | 19   | 15   | 16   | 19   | 16   | 16   | 0.98     | 0.864836 | 12   | 15   | 16   | 14   | 15   | 11   | 15   | 11   | 14   | 13   | 1.09     | 0.484798 | 13   | 1.09     | 0.600648 |
| 250428_at   | At1g01560 | MAP kinase, putative similar to MAP k                                               | 26   | 29   | 34   | 30   | 42   | 38   | 30   | 37   | 0.80     | 0.146886 | 19   | 38   | 30   | 30   | 19   | 20   | 19   | 19   | 19   | 19   | 1.19     | 0.880505 | 17   | 1.08     | 0.539462 |
| 250429_at   | At1g01600 | cyclochrome P450, putative similar to c                                             | 44   | 52   | 44   | 63   | 55   | 52   | 57   | 0.90 | 0.428604 | 43       | 52   | 54   | 52   | 50   | 43   | 53   | 49   | 43   | 43   | 52   | 0.93     | 0.017859 | 44   | 0.95     | 0.062366 |
| 250430_at   | At1g01610 | hypothehtical protein similar to putative                                           | 510  | 588  | 657  | 624  | 674  | 532  | 585  | 610  | 0.96     | 0.697416 | 398  | 385  | 405  | 487  | 395  | 335  | 418  | 412  | 396  | 409  | 0.97     | 0.696223 | 406  | 0.98     | 0.839570 |
| 250431_at   | At1g01620 | plasma membrane intrinsic protein 1c,                                               | 1292 | 2089 | 1776 | 1436 | 1658 | 1316 | 1719 | 1470 | 1.11     | 0.379781 | 1444 | 1912 | 1347 | 2176 | 1506 | 1526 | 1833 | 1829 | 1568 | 1774 | 0.88     | 0.357848 | 1736 | 0.90     | 0.580835 |
| 250432_at   | At1g01520 | mvo-related protein, putative similar to                                            | 10   | 11   | 30   | 22   | 17   | 13   | 17   | 17   | 0.99     | 0.987478 | 8    | 11   | 11   | 15   | 9    | 11   | 10   | 10   | 11   | 11   | 0.93     | 0.672921 | 11   | 0.93     | 0.743370 |
| 250433_at   | At1g01570 | hypothehtical protein predicted by oensc                                            | 117  | 187  | 170  | 203  | 184  | 167  | 172  | 202  | 0.87     | 0.137526 | 194  | 183  | 197  | 143  | 159  | 126  | 107  | 149  | 126  | 107  | 0.99     | 0.023986 | 163  | 0.63     | 0.022756 |
| 250434_at   | At1g01490 | unknown protein                                                                     | 332  | 508  | 385  | 453  | 502  | 353  | 402  | 436  | 0.92     | 0.648772 | 258  | 233  | 254  | 431  | 343  | 277  | 302  | 295  | 248  | 329  | 0.75     | 0.071913 | 350  | 0.71     | 0.088063 |
| 250435_at   | At1g01450 | hypothehtical protein similar to putative ;                                         | 23   | 19   | 27   | 27   | 33   | 19   | 23   | 26   | 0.86     | 0.493061 | 16   | 21   |      |      |      |      |      |      |      |      |          |          |      |          |          |

|          |          |                                                                                         |      |      |      |      |      |      |      |      |      |          |      |      |      |      |      |      |      |      |      |          |          |          |          |          |          |
|----------|----------|-----------------------------------------------------------------------------------------|------|------|------|------|------|------|------|------|------|----------|------|------|------|------|------|------|------|------|------|----------|----------|----------|----------|----------|----------|
| 25990    | A113430  | R regulatory subunit of protein phosphoserine/threonine protein phosphatase 2           | 69   | 93   | 101  | 113  | 109  | 91   | 88   | 105  | 0.84 | 0.224027 | 68   | 67   | 74   | 97   | 87   | 80   | 70   | 84   | 0.83 | 0.026989 | 85       | 0.82     | 0.006142 |          |          |
| 25990    | A113430  | hypothetical protein predicted by gene expressed protein                                | 10   | 12   | 9    | 12   | 11   | 13   | 11   | 12   | 0.89 | 0.307236 | 8    | 9    | 11   | 14   | 13   | 11   | 13   | 10   | 0.73 | 0.006766 | 14       | 0.70     | 0.000671 |          |          |
| 259361   | A1134340 | acetaldehyde-3-phosphate dehydrogenase 3-phosphatase dehydrogenase                      | 2728 | 3099 | 2906 | 3426 | 3306 | 2992 | 2911 | 3241 | 0.90 | 0.120526 | 3172 | 3084 | 3197 | 4021 | 3106 | 2885 | 3835 | 3583 | 3151 | 3486     | 0.90     | 0.288332 | 3337     | 0.94     | 0.622176 |
| 259362_s | A1134350 | serine threonine kinase, putative similar to kinase family protein                      | 283  | 439  | 464  | 466  | 511  | 404  | 395  | 460  | 0.86 | 0.368489 | 306  | 309  | 364  | 466  | 356  | 316  | 379  | 389  | 327  | 381      | 0.86     | 0.176210 | 379      | 0.86     | 0.338988 |
| 259363   | A1134370 | methionine aminopeptidase 1 (MAP1), metalloproteinase M24 family protein                | 151  | 175  | 201  | 202  | 204  | 172  | 225  | 207  | 0.77 | 0.104885 | 227  | 213  | 218  | 216  | 205  | 203  | 219  | 214  | 102  | 0.162626 | 207      | 1.06     | 0.126331 |          |          |
| 259364   | A1134380 | DNA-binding protein RAV1, putative similar to DNA-binding protein RAV1 (RAV1)           | 49   | 67   | 44   | 67   | 44   | 67   | 44   | 67   | 0.82 | 0.234243 | 49   | 67   | 44   | 67   | 44   | 67   | 44   | 67   | 44   | 67       | 0.82     | 0.234243 | 49       | 67       | 0.82     |
| 259365   | A1134300 | unknown protein; supported by cDNA, myb family transcription factor                     | 17   | 17   | 25   | 19   | 18   | 19   | 20   | 19   | 0.77 | 0.655600 | 19   | 18   | 20   | 24   | 22   | 22   | 28   | 21   | 19   | 23       | 0.82     | 0.061513 | 23       | 0.84     | 0.032338 |
| 259366   | A1134280 | allene oxide cyclase, putative similar to allene oxide cyclase family protein           | 108  | 595  | 592  | 1104 | 1211 | 942  | 565  | 1086 | 0.52 | 0.003334 | 685  | 832  | 735  | 1325 | 1074 | 961  | 1175 | 1135 | 751  | 1134     | 0.66     | 0.006411 | 1120     | 0.67     | 0.033292 |
| 259367   | A1136970 | hypothetical protein predicted by gene expressed protein                                | 506  | 214  | 189  | 217  | 234  | 184  | 196  | 212  | 0.93 | 0.417401 | 132  | 122  | 152  | 172  | 132  | 165  | 179  | 136  | 163  | 0.83     | 0.136137 | 150      | 0.91     | 0.423440 |          |
| 259368   | A1136970 | hypothetical protein predicted by gene expressed protein                                | 396  | 54   | 101  | 122  | 122  | 122  | 122  | 122  | 0.82 | 0.003759 | 682  | 969  | 969  | 969  | 969  | 969  | 969  | 969  | 969  | 969      | 0.82     | 0.003759 | 969      | 0.82     | 0.003759 |
| 259369_s | A1169150 | hypothetical protein similar to putative (DC1) domain-containing protein // DC1_c       | 9    | 15   | 14   | 19   | 19   | 17   | 12   | 18   | 0.67 | 0.029916 | 9    | 10   | 19   | 12   | 15   | 10   | 11   | 13   | 11   | 11       | 0.63     | 0.263399 | 12       | 1.05     | 0.852274 |
| 259370   | A1169050 | hypothetical protein predicted by gene expressed protein                                | 5    | 62   | 72   | 51   | 52   | 49   | 50   | 122  | 0.72 | 0.127157 | 57   | 83   | 61   | 68   | 58   | 55   | 73   | 60   | 67   | 63       | 1.06     | 0.597992 | 60       | 1.11     | 0.499297 |
| 259371   | A1169080 | unknown protein; supported by full-length universal stress protein (USP) family protein | 40   | 49   | 70   | 64   | 79   | 64   | 53   | 69   | 0.77 | 0.188077 | 37   | 36   | 36   | 36   | 36   | 36   | 36   | 36   | 36   | 36       | 0.91     | 0.375857 | 37       | 0.97     | 0.802731 |
| 259372   | A1169120 | hypothetical protein predicted by gene expressed protein                                | 18   | 40   | 19   | 18   | 19   | 19   | 19   | 19   | 0.74 | 0.156187 | 14   | 14   | 14   | 14   | 14   | 14   | 14   | 14   | 14   | 14       | 0.74     | 0.156187 | 14       | 1.03     | 0.635719 |
| 259373   | A1169160 | hypothetical protein predicted by gene expressed protein                                | 18   | 40   | 19   | 18   | 19   | 19   | 19   | 19   | 0.74 | 0.156187 | 14   | 14   | 14   | 14   | 14   | 14   | 14   | 14   | 14   | 14       | 0.74     | 0.156187 | 14       | 1.03     | 0.635719 |
| 259374   | A1169280 | putative AP2 domain transcription factor AP2 domain-containing transcription factor     | 45   | 43   | 62   | 72   | 73   | 78   | 50   | 75   | 0.67 | 0.010634 | 39   | 43   | 47   | 67   | 55   | 53   | 66   | 65   | 43   | 61       | 0.70     | 0.045629 | 58       | 0.74     | 0.035829 |
| 259375   | A1169370 | putative APG protein similar to anti-feral GDSL-motif lipase/hydrolase family protein   | 1589 | 1505 |      |      |      |      |      |      |      |          |      |      |      |      |      |      |      |      |      |          |          |          |          |          |          |

|              |            |                                                                                        |      |      |      |      |      |      |      |      |          |          |          |      |      |      |      |      |      |      |      |          |          |          |          |          |          |          |
|--------------|------------|----------------------------------------------------------------------------------------|------|------|------|------|------|------|------|------|----------|----------|----------|------|------|------|------|------|------|------|------|----------|----------|----------|----------|----------|----------|----------|
| 259271_at    | A13g01170  | Expressed protein ; supported by full-length expressed protein                         | 47   | 76   | 78   | 78   | 91   | 78   | 67   | 82   | 0.81     | 0.225251 | 63       | 74   | 73   | 100  | 82   | 81   | 78   | 71   | 70   | 83       | 0.85     | 0.118269 | 88       | 0.79     | 0.062126 |          |
| 259272_at    | A13g01290  | unknown protein similar to hypothetical band 7 family protein                          | 22   | 15   | 23   | 11   | 21   | 13   | 20   | 15   | 1.35     | 0.243781 | 11       | 14   | 12   | 11   | 8    | 8    | 11   | 15   | 12   | 11       | 1.15     | 0.386691 | 9        | 1.34     | 0.069349 |          |
| 259273_s_at  | A13g015080 | serine/threonine-specific protein kinase protein kinase, putative                      | 151  | 197  | 213  | 266  | 279  | 212  | 187  | 253  | 0.74     | 0.078582 | 128      | 123  | 142  | 217  | 175  | 141  | 194  | 190  | 131  | 183      | 0.71     | 0.023019 | 178      | 0.74     | 0.109699 |          |
| 259274_at    | A13g014300 | putative homodimeric leucine zipper core homodimeric leucine zipper protein, outath    | 52   | 49   | 71   | 102  | 79   | 87   | 64   | 89   | 0.72     | 0.058666 | 43       | 43   | 54   | 52   | 47   | 40   | 56   | 50   | 52   | 52       | 0.94     | 0.078631 | 50       | 0.94     | 0.064874 |          |
| 259275_at    | A13g01060  | unknown protein ; supported by full-length expressed protein                           | 120  | 166  | 159  | 172  | 154  | 142  | 148  | 156  | 0.95     | 0.665620 | 120      | 125  | 140  | 185  | 140  | 115  | 140  | 134  | 129  | 143      | 0.90     | 0.410456 | 146      | 0.88     | 0.449582 |          |
| 259276_at    | A13g01190  | putative peroxidase very similar to peric peroxidase 27 (PER27) (PRXR7)                | 27   | 32   | 43   | 39   | 38   | 33   | 40   | 0.82 | 0.167274 | 28       | 29       | 31   | 34   | 31   | 25   | 40   | 34   | 29   | 33   | 0.89     | 0.315505 | 30       | 0.97     | 0.789926 |          |          |
| 259277_at    | A13g01180  | putative glycogen synthase similar to glycogen synthase (P27) (PRXR7)                  | 195  | 257  | 290  | 326  | 360  | 286  | 247  | 324  | 0.76     | 0.095975 | 173      | 163  | 198  | 277  | 228  | 186  | 224  | 207  | 178  | 225      | 0.79     | 0.072142 | 230      | 0.77     | 0.135731 |          |
| 259278_at    | A13g01160  | putative protein predicted by gene expression                                          | 175  | 189  | 192  | 209  | 190  | 212  | 180  | 192  | 0.86     | 0.074460 | 200      | 175  | 206  | 232  | 214  | 212  | 194  | 205  | 212  | 212      | 0.89     | 0.273797 | 218      | 0.90     | 0.164066 |          |
| 259279_at    | A13g01120  | putative cystathionine gamma-synthase cystathionine gamma-synthase, chlorotol          | 881  | 994  | 987  | 1277 | 1252 | 1094 | 954  | 1208 | 0.79     | 0.020102 | 946      | 846  | 1011 | 1391 | 1308 | 1049 | 1129 | 1125 | 934  | 1200     | 0.78     | 0.027692 | 1249     | 0.75     | 0.050153 |          |
| 259280_at    | A13g01150  | putative coloviridinae trach-binding or coloviridinae trach-binding protein, outath    | 212  | 282  | 259  | 274  | 242  | 251  | 159  | 180  | 214      | 0.84     | 0.368030 | 108  | 115  | 117  | 182  | 119  | 113  | 157  | 140  | 113      | 144      | 0.78     | 0.115494 | 138      | 0.82     | 0.319145 |
| 259281_at    | A13g01140  | putative MvB-related transcription factor mvb family transcription factor (MYB108      | 132  | 148  | 142  | 112  | 136  | 98   | 140  | 115  | 1.22     | 0.103475 | 118      | 115  | 155  | 112  | 111  | 102  | 107  | 129  | 106  | 106      | 1.22     | 0.051504 | 107      | 1.21     | 0.199668 |          |
| 259282_at    | A13g01130  | unknown protein similar to unknown or ohoshellidoldiverol acyltransferase fa           | 35   | 40   | 47   | 51   | 45   | 37   | 44   | 0.82 | 0.506247 | 30       | 28       | 41   | 36   | 26   | 27   | 40   | 38   | 33   | 33   | 100      | 0.899660 | 30       | 1.12     | 0.523970 |          |          |
| 259283_at    | A13g01140  | putative transcription factor similar to G mys family transcription factor (MY565)     | 65   | 78   | 81   | 83   | 89   | 76   | 75   | 83   | 0.90     | 0.255341 | 59       | 63   | 62   | 75   | 66   | 58   | 68   | 64   | 61   | 66       | 0.92     | 0.243022 | 67       | 0.92     | 0.366232 |          |
| 259284_at    | A13g011450 | putative cell division related protein sim DNAJ heat shock N-terminal domain-con       | 179  | 244  | 227  | 206  | 250  | 172  | 217  | 209  | 1.04     | 0.813961 | 200      | 191  | 189  | 226  | 182  | 181  | 182  | 178  | 193  | 190      | 1.02     | 0.789765 | 196      | 0.98     | 0.846483 |          |
| 259285_at    | A13g011460 | hypothetical protein similar to putative ; pentatricopeptide (PPR) repeat-containi     | 24   | 32   | 35   | 42   | 32   | 32   | 36   | 0.87 | 0.240336 | 21       | 17       | 24   | 20   | 23   | 20   | 18   | 21   | 20   | 1.02 | 0.811662 | 21       | 0.98     | 0.851132 |          |          |          |
| 259286_at    | A13g011480 | hypothetical protein similar to hypoethi S-adenosyl-L-methionine carboxyl methi        | 27   | 33   | 28   | 48   | 36   | 39   | 29   | 41   | 0.71     | 0.042480 | 19       | 17   | 39   | 50   | 50   | 40   | 65   | 62   | 25   | 53       | 0.47     | 0.010505 | 47       | 0.53     | 0.046197 |          |
| 259287_at    | A13g011490 | putative eukaryotic translation initiation eukaryotic translation initiation factor 3G | 247  | 314  | 179  | 241  | 242  | 159  | 180  | 214  | 0.84     | 0.368030 | 108      | 115  | 117  | 182  | 119  | 113  | 157  | 140  | 113  | 144      | 0.78     | 0.115494 | 138      | 0.82     | 0.319145 |          |
| 259288_at    | A13g011500 | putative small nuclear ribonucleoprotein small nuclear ribonucleoprotein G, outath     | 528  | 596  | 546  | 694  | 743  | 597  | 556  | 678  | 0.82     | 0.062132 | 492      | 452  | 572  | 739  | 620  | 547  | 600  | 604  | 505  | 622      | 0.81     | 0.057048 | 635      | 0.80     | 0.121527 |          |
| 259289_at    | A13g011350 | hypothetical protein predicted by gene expression                                      | 30   | 29   | 40   | 39   | 39   | 39   | 33   | 39   | 0.85     | 0.145845 | 26       | 27   | 31   | 28   | 26   | 27   | 32   | 28   | 28   | 28       | 0.99     | 0.907865 | 27       | 1.04     | 0.520649 |          |
| 259290_at    | A13g011520 | putative cyclin similar to cyclin cycb1 G cyclin, putative (CYC2)                      | 241  | 304  | 288  | 312  | 308  | 270  | 278  | 297  | 0.94     | 0.458441 | 425      | 420  | 508  | 586  | 482  | 445  | 448  | 443  | 451  | 481      | 0.94     | 0.506952 | 504      | 0.89     | 0.355952 |          |
| 259291_at    | A13g011550 | unknown protein similar to unknown pr integral membrane family protein                 | 33   | 45   | 47   | 45   | 47   | 45   | 39   | 42   | 0.93     | 0.780911 | 40       | 40   | 47   | 39   | 35   | 35   | 36   | 38   | 42   | 37       | 1.15     | 0.037287 | 36       | 1.16     | 0.107016 |          |
| 259292_at    | A13g011560 | unknown protein                                                                        | 284  | 471  | 463  | 367  | 452  | 289  | 406  | 369  | 1.10     | 0.671644 | 274      | 234  | 250  | 359  | 287  | 274  | 347  | 324  | 252  | 318      | 0.79     | 0.031861 | 306      | 0.82     | 0.134413 |          |
| 259293_at    | A13g011580 | putative DNA binding protein similar to DNA-binding protein, putative                  | 54   | 64   | 79   | 82   | 75   | 66   | 76   | 87   | 0.87     | 0.279854 | 71       | 86   | 83   | 69   | 58   | 63   | 79   | 77   | 80   | 69       | 1.16     | 0.135458 | 63       | 1.27     | 0.038479 |          |
| 259299_at    | A13g011540 | sonidy (obberlein signal transduction) obberlein signal transduction protein (S        | 381  | 489  | 549  | 559  | 627  | 459  | 473  | 548  | 0.86     | 0.339422 | 301      | 287  | 320  | 448  | 390  | 328  | 379  | 351  | 303  | 379      | 0.80     | 0.034274 | 389      | 0.78     | 0.075736 |          |
| 259299_at    | A13g011570 | unknown protein similar to unknown pr DC1 domain-containing protein                    | 21   | 27   | 50   | 31   | 30   | 27   | 32   | 29   | 1.10     | 0.751465 | 23       | 23   | 24   | 25   | 21   | 21   | 24   | 22   | 23   | 23       | 1.02     | 0.617750 | 22       | 1.04     | 0.504164 |          |
| 2592961_at   | A13g011390 | unknown protein similar to unknown pr DC1 domain-containing protein                    | 32   | 31   | 32   | 37   | 37   | 30   | 31   | 33   | 0.96     | 0.598536 | 24       | 27   | 17   | 25   | 22   | 23   | 25   | 24   | 0.96 | 0.707749 | 23       | 0.98     | 0.915737 |          |          |          |
| 2592931_at   | A13g011410 | protein phosphatase 2C (PP2C) identical protein phosphatase 2C, putative / PP2C        | 589  | 734  | 1162 | 1029 | 1195 | 814  | 828  | 1013 | 0.82     | 0.417409 | 731      | 745  | 674  | 1118 | 925  | 945  | 1231 | 1143 | 717  | 1073     | 0.67     | 0.004479 | 996      | 0.72     | 0.012576 |          |
| 2592932_at   | A13g011420 | unknown protein similar to hypothetical fringe-related protein                         | 101  | 103  | 142  | 140  | 170  | 139  | 115  | 150  | 0.77     | 0.106857 | 130      | 127  | 131  | 137  | 125  | 132  | 155  | 149  | 129  | 140      | 0.92     | 0.206954 | 132      | 0.98     | 0.595406 |          |
| 2592933_at   | A13g011380 | hypothetical protein                                                                   | 12   | 11   | 15   | 13   | 19   | 13   | 13   | 15   | 0.84     | 0.067595 | 9        | 10   | 16   | 12   | 9    | 15   | 10   | 11   | 12   | 0.94     | 0.758384 | 12       | 0.98     | 0.826896 |          |          |
| 2592934_at   | A13g011600 | unknown protein similar to unknown pr expressed protein                                | 212  | 260  | 242  | 311  | 216  | 232  | 261  | 283  | 0.83     | 0.254927 | 272      | 283  | 265  | 339  | 289  | 275  | 287  | 247  | 239  | 289      | 0.83     | 0.222660 | 289      | 0.78     | 0.060522 |          |
| 2592935_at   | A13g011620 | hypothetical protein predicted by gene expression                                      | 603  | 749  | 908  | 579  | 572  | 470  | 753  | 540  | 1.39     | 0.088691 | 882      | 987  | 957  | 1170 | 872  | 880  | 966  | 964  | 942  | 970      | 0.97     | 0.719036 | 974      | 0.97     | 0.772342 |          |
| 2592936_at   | A13g011530 | unknown protein ; supported by full-length vacuolar protein sorting 55 family protein  | 304  | 331  | 493  | 436  | 510  | 449  | 409  | 465  | 0.88     | 0.406086 | 478      | 549  | 535  | 662  | 557  | 551  | 506  | 527  | 521  | 561      | 0.93     | 0.347617 | 590      | 0.88     | 0.176234 |          |
| 2592937_at   | A13g011630 | putative 2-cys peroxiredoxin BAS1 per 2-cys peroxiredoxin, chloroplast (BAS1)          | 706  | 1033 | 995  | 1060 | 1117 | 858  | 931  | 1012 | 0.92     | 0.520598 | 1021     | 1140 | 1068 | 1415 | 1134 | 1045 | 1145 | 1128 | 1076 | 1173     | 0.92     | 0.331914 | 1198     | 0.90     | 0.356295 |          |
| 2592938_at   | A13g011400 | putative eukaryotic translation initiation eukaryotic translation initiation factor 3G | 1048 | 1291 | 1299 | 1368 | 1485 | 1251 | 1212 | 1368 | 0.89     | 0.216949 | 1211     | 1373 | 1319 | 1764 | 1374 | 1297 | 1250 | 1263 | 1301 | 1390     | 0.94     | 0.528938 | 1478     | 0.88     | 0.309602 |          |
| 2592939_at   | A13g011510 | putative 40S ribosomal protein s14 sim 40S ribosomal protein S14 (RPS14B)              | 3183 | 3153 | 2930 | 3101 | 3393 | 3048 | 2889 | 3181 | 0.91     | 0.213317 | 3198     | 3240 | 3381 | 3972 | 3656 | 3135 | 3404 | 3266 | 3273 | 3486     | 0.94     | 0.332927 | 3588     | 0.91     | 0.277308 |          |
| 2592940_at   | A13g011590 | unknown protein                                                                        | 168  | 220  | 210  | 268  | 278  | 229  | 199  | 258  | 0.77     | 0.050527 | 159      | 166  | 179  | 253  | 200  | 172  | 228  | 225  | 168  | 216      | 0.78     | 0.044715 | 208      | 0.81     | 0.174168 |          |
| 2592941_at   | A13g033530 | unknown protein similar to unknown pr transducin family protein / WD-40 repeat         | 225  | 267  | 273  | 330  | 351  | 276  | 255  | 319  | 0.80     | 0.077850 | 204      | 167  | 212  | 291  | 238  | 193  | 237  | 212  | 195  | 234      | 0.83     | 0.151223 | 241      | 0.81     | 0.215713 |          |
| 2592942_at   | A13g033520 | putative actin similar to actin 1 (GP2) actin-related protein 6 (ARPG)                 | 338  | 460  | 442  | 448  | 503  | 382  | 421  | 444  | 0.95     | 0.688920 | 346      | 353  | 355  | 452  | 433  | 407  | 447  | 447  | 454  | 458      | 0.77     | 0.017520 | 464      | 0.78     | 0.065762 |          |
| 2592943_at   | A13g07565  | unknown protein similar to unknown pr expressed protein                                | 105  | 154  | 162  | 178  | 171  | 151  | 140  | 167  | 0.84     | 0.248973 | 149      | 185  | 170  | 226  | 178  | 178  | 181  | 167  | 168  | 186      | 0.90     | 0.297449 | 194      | 0.87     | 0.250342 |          |
| 2592944_at   | A13g07650  | unknown protein similar to zinc finger c zinc finger (B-box type) family protein       | 37   | 72   | 59   | 42   | 62   | 40   | 56   | 48   | 1.17     | 0.551893 | 36       | 45   | 38   | 36   | 32   | 41   | 48   | 44   | 40   | 44       | 1.00     | 0.966538 | 36       | 1.10     | 0.381849 |          |
| 2592945_at   | A13g07660  | unknown protein predicted by gene expression                                           | 226  | 294  | 314  | 280  | 318  | 223  | 278  | 274  | 1.02     | 0.197617 | 183      | 134  | 175  | 187  | 161  | 148  | 183  | 172  | 164  | 170      | 0.96     | 0.686820 | 165      | 0.99     | 0.937604 |          |
| 2592946_s_at | A13g07730  | hypothetical protein predicted by gene expression protein JI/ hypothetical protein     | 55   | 57   | 67   | 83   | 105  | 79   | 70   | 92   | 0.75     | 0.126269 | 61       | 57   | 66   | 75   | 68   | 67   | 79   | 88   | 61   | 75       | 0.81     | 0.043013 | 70       | 0.88     | 0.073735 |          |
| 2592947_at   | A13g07670  | unknown protein predicted by gene expression protein JI/ membrane protein              | 548  | 582  | 578  | 684  | 752  | 631  | 530  | 682  | 0.78     | 0.085922 | 560      | 580  | 606  | 638  | 615  | 630  | 511  | 485  | 583  | 615      | 0.85     | 0.694195 | 648      | 0.84     | 0.148602 |          |
| 2592948_at   | A13g07770  | putative heat-shock protein similar to h heat shock protein-related                    | 545  | 599  | 622  | 758  | 802  | 737  | 589  | 765  | 0.77     | 0.003948 | 527      | 421  | 642  | 687  | 631  | 457  | 563  | 530  | 578  | 578      | 0.92     | 0.515907 | 592      | 0.90     | 0.546536 |          |
| 2592949_at   | A13g07790  | hypothetical protein predicted by gene expression                                      | 427  | 490  | 525  | 640  | 649  | 482  | 481  | 590  | 0.81     | 0.147772 | 414      | 421  | 439  | 590  | 455  | 426  | 514  | 517  | 425  | 500      | 0.85     | 0.094637 | 490      | 0.87     | 0.267997 |          |
| 2592950_at   | A13g07580  | unknown protein                                                                        | 166  | 219  | 174  | 170  | 180  | 141  | 186  | 164  | 1.14     | 0.329499 | 228      | 198  | 244  | 257  | 223  | 221  | 201  | 188  | 223  | 218      | 1.02     | 0.785263 | 234      | 0.96     | 0.590848 |          |
| 2592951_at   | A13g07600  | unknown protein identical to residues 2 heavy-v-metal-associated domain-contain        | 30   | 32   | 42   | 42   | 42   | 30   | 32   | 42   | 0.82     | 0.216416 | 31       | 31   | 34   | 32   | 27   | 34   | 32   | 31   | 34   | 32       | 0.83     | 0.216416 | 34       | 0.83     | 0.216416 |          |
| 2592952_at   |            |                                                                                        |      |      |      |      |      |      |      |      |          |          |          |      |      |      |      |      |      |      |      |          |          |          |          |          |          |          |

|             |           |                                                                                           |     |      |      |      |      |     |     |      |          |          |     |      |     |      |     |      |     |       |      |          |          |          |          |          |          |
|-------------|-----------|-------------------------------------------------------------------------------------------|-----|------|------|------|------|-----|-----|------|----------|----------|-----|------|-----|------|-----|------|-----|-------|------|----------|----------|----------|----------|----------|----------|
| 259177_at   | A13g01630 | hypothetical protein similar to putative ; nodulin-related                                | 37  | 49   | 47   | 54   | 52   | 44  | 50  | 0.89 | 0.327676 | 48       | 46  | 49   | 51  | 41   | 42  | 62   | 59  | 48    | 51   | 0.94     | 0.608263 | 44       | 1.07     | 0.375661 |          |
| 259178_at   | A13g01650 | unknown protein similar to hypothetical cytochrome-related                                | 162 | 212  | 240  | 227  | 229  | 178 | 204 | 211  | 0.97     | 0.818453 | 248 | 269  | 227 | 345  | 232 | 244  | 348 | 313   | 248  | 296      | 0.84     | 0.206751 | 273      | 0.91     | 0.537416 |
| 259179_at   | A13g01660 | hypothetical protein similar to putative c expressed protein                              | 51  | 98   | 84   | 93   | 91   | 68  | 78  | 84   | 0.93     | 0.721271 | 68  | 69   | 72  | 116  | 78  | 93   | 95  | 86    | 70   | 94       | 0.75     | 0.031314 | 96       | 0.73     | 0.081317 |
| 259180_at   | A13g01680 | unknown protein                                                                           | 43  | 61   | 56   | 53   | 57   | 52  | 63  | 52   | 0.85     | 0.265956 | 33  | 37   | 44  | 67   | 45  | 47   | 48  | 53    | 47   | 48       | 0.37     | 0.076232 | 47       | 0.48     | 0.232844 |
| 259181_at   | A13g01690 | unknown protein similar to putative crol expressed protein                                | 406 | 647  | 534  | 687  | 666  | 630 | 529 | 661  | 0.80     | 1.041777 | 527 | 585  | 573 | 1055 | 672 | 618  | 756 | 695   | 561  | 739      | 0.76     | 0.064989 | 748      | 0.75     | 0.152653 |
| 259182_at   | A13g01750 | hypothetical protein predicted by geneX analysis repeat family protein                    | 84  | 105  | 86   | 124  | 139  | 104 | 92  | 123  | 0.75     | 0.064307 | 62  | 58   | 64  | 97   | 85  | 73   | 89  | 81    | 61   | 85       | 0.72     | 0.005208 | 85       | 0.72     | 0.030123 |
| 259183_at   | A13g01580 | hypothetical protein similar to putative ; pentatricopeptide repeat (PPR) repeat-contains | 13  | 15   | 15   | 15   | 19   | 15  | 14  | 16   | 0.89     | 0.351190 | 10  | 10   | 11  | 16   | 12  | 16   | 12  | 10    | 10   | 13       | 0.79     | 0.142226 | 15       | 0.70     | 0.036413 |
| 259184_at   | A13g01590 | hypothetical protein supported by full-length expressed protein (USP) family c            | 548 | 761  | 650  | 934  | 865  | 704 | 828 | 934  | 0.91     | 0.806569 | 708 | 742  | 671 | 1041 | 844 | 871  | 908 | 816   | 689  | 919      | 0.75     | 0.094727 | 919      | 0.75     | 0.094727 |
| 259185_at   | A13g01550 | putative c-hosphatidylcholine:inositol triose c-hosphatidylcholine translocator           | 25  | 42   | 45   | 38   | 37   | 36  | 37  | 37   | 1.00     | 0.996510 | 27  | 28   | 30  | 28   | 25  | 26   | 34  | 27    | 28   | 28       | 1.02     | 0.815658 | 26       | 1.08     | 0.182222 |
| 259186_at   | A13g01590 | unknown protein similar to possible aoc 1-epimerase family protein                        | 231 | 365  | 407  | 345  | 409  | 288 | 334 | 347  | 0.96     | 0.849052 | 285 | 349  | 312 | 510  | 267 | 361  | 375 | 359   | 315  | 395      | 0.80     | 0.102145 | 413      | 0.76     | 0.135362 |
| 259187_at   | A13g01530 | putative transcription factor similar to m myb family transcription factor (MYB57)        | 32  | 42   | 40   | 74   | 59   | 55  | 38  | 63   | 0.61     | 0.019655 | 40  | 41   | 54  | 117  | 74  | 95   | 86  | 45    | 89   | 0.80     | 0.006553 | 89       | 0.81     | 0.040897 |          |
| 259188_at   | A13g01510 | unknown protein - supported by full-len 5-AMP-activated protein kinase beta-1             | 86  | 113  | 106  | 126  | 171  | 133 | 108 | 143  | 0.75     | 0.125054 | 102 | 91   | 111 | 144  | 120 | 111  | 137 | 133   | 101  | 129      | 0.79     | 0.021277 | 125      | 0.81     | 0.105041 |
| 259189_at   | A13g01700 | unknown protein                                                                           | 135 | 98   | 110  | 81   | 32   | 114 | 60  | 1.89 | 0.897804 | 40       | 51  | 43   | 32  | 22   | 38  | 25   | 23  | 45    | 28   | 1.50     | 0.01985  | 31       | 1.46     | 0.062337 |          |
| 259190_at   | A13g01780 | unknown protein est hit, predicted by c expressed protein                                 | 247 | 263  | 270  | 315  | 330  | 294 | 260 | 313  | 0.83     | 0.013046 | 272 | 232  | 298 | 361  | 306 | 222  | 348 | 314   | 267  | 310      | 0.86     | 0.269540 | 297      | 0.90     | 0.550355 |
| 259191_at   | A13g01720 | unknown protein                                                                           | 165 | 196  | 203  | 232  | 253  | 184 | 188 | 223  | 0.84     | 0.205819 | 121 | 84   | 120 | 146  | 122 | 141  | 130 | 108   | 132  | 0.82     | 0.067719 | 131      | 0.83     | 0.194880 |          |
| 259192_at   | A13g01740 | unknown protein - supported by full-len expressed protein                                 | 429 | 573  | 566  | 648  | 736  | 562 | 523 | 658  | 0.79     | 0.097264 | 578 | 650  | 591 | 873  | 737 | 656  | 699 | 695   | 606  | 732      | 0.83     | 0.053559 | 755      | 0.80     | 0.090022 |
| 259193_at   | A13g01480 | putative thiadiazol lumen rotamase simi oestidi-crochi cis-trans isomerase, outal         | 240 | 476  | 338  | 373  | 376  | 288 | 351 | 346  | 1.02     | 0.943755 | 267 | 306  | 309 | 388  | 306 | 281  | 319 | 340   | 294  | 327      | 0.90     | 0.254158 | 325      | 0.90     | 0.426722 |
| 259194_at   | A13g01540 | RNA helicase, DRH1 identical to RNA DEAD box RNA helicase (DRH1)                          | 797 | 1032 | 1100 | 1005 | 1205 | 955 | 976 | 1055 | 0.93     | 0.545474 | 705 | 670  | 709 | 904  | 723 | 667  | 822 | 836   | 695  | 790      | 0.88     | 0.143826 | 765      | 0.91     | 0.388244 |
| 259195_at   | A13g01730 | hypothetical protein predicted by geneX expressed protein                                 | 28  | 38   | 45   | 45   | 44   | 41  | 37  | 43   | 0.88     | 0.284349 | 31  | 28   | 29  | 33   | 28  | 38   | 32  | 30    | 33   | 0.90     | 0.182701 | 32       | 0.94     | 0.329109 |          |
| 259196_at   | A13g01500 | carbonic anhydrase, chloroplast precu carbonic anhydrase 1, chloroplast / carb            | 34  | 31   | 49   | 47   | 45   | 38  | 38  | 43   | 0.86     | 0.439084 | 30  | 38   | 38  | 52   | 44  | 41   | 39  | 38    | 35   | 43       | 0.82     | 0.096830 | 46       | 0.77     | 0.088479 |
| 259197_at   | A13g01640 | unknown protein similar to unknown c GMP kinase family protein                            | 127 | 132  | 177  | 196  | 207  | 172 | 145 | 192  | 0.76     | 0.071464 | 124 | 139  | 124 | 201  | 151 | 143  | 159 | 150   | 129  | 161      | 0.80     | 0.066617 | 165      | 0.78     | 0.127524 |
| 259198_at   | A13g01490 | putative protein kinase similar to ATM/ protein kinase, putative                          | 60  | 79   | 87   | 130  | 135  | 113 | 76  | 126  | 0.60     | 0.008365 | 75  | 92   | 85  | 181  | 129 | 137  | 137 | 120   | 84   | 141      | 0.60     | 0.008021 | 149      | 0.57     | 0.019035 |
| 259199_at   | A13g01770 | hypothetical protein contains bromodomain-DNA-binding bromodomain-contains o              | 560 | 939  | 965  | 764  | 1011 | 610 | 821 | 795  | 1.03     | 0.887670 | 641 | 608  | 608 | 719  | 654 | 659  | 694 | 700   | 619  | 685      | 0.90     | 0.011302 | 678      | 0.91     | 0.067982 |
| 259199_at   | A13g01470 | homeobox-leucine zipper protein HAT5 homeobox-leucine zipper protein 5 (HAT5)             | 38  | 40   | 45   | 87   | 65   | 66  | 41  | 73   | 0.56     | 0.013350 | 51  | 46   | 55  | 156  | 97  | 119  | 112 | 110   | 51   | 119      | 0.43     | 0.002159 | 124      | 0.41     | 0.013132 |
| 259199_at   | A13g01670 | unknown protein - supported by cDNA-expressed protein                                     | 56  | 77   | 63   | 79   | 94   | 74  | 66  | 82   | 0.80     | 0.125536 | 70  | 62   | 62  | 104  | 74  | 64   | 96  | 90    | 65   | 86       | 0.76     | 0.080643 | 81       | 0.80     | 0.264739 |
| 259199_at   | A13g01570 | unknown protein similar to oleosin GB-A glycoprotein c / oleosin                          | 33  | 35   | 44   | 293  | 39   | 34  | 37  | 122  | 0.30     | 0.377989 | 26  | 30   | 33  | 34   | 29  | 29   | 36  | 31    | 30   | 32       | 0.94     | 0.394832 | 31       | 0.97     | 0.757995 |
| 259199_at   | A13g01300 | unknown protein Pfam HMM hit: EF ha calcium-binding EF hand family protein                | 679 | 640  | 839  | 933  | 1048 | 812 | 722 | 931  | 0.78     | 0.089565 | 671 | 704  | 733 | 752  | 706 | 670  | 773 | 791   | 702  | 738      | 0.95     | 0.312102 | 770      | 0.99     | 0.834343 |
| 259199_s_at | A13g01070 | putative DNA ovase similar to B similar c RNA toosomerase, ATP-hydrolyzino, c             | 217 | 287  | 285  | 298  | 334  | 258 | 263 | 297  | 0.89     | 0.350221 | 159 | 135  | 185 | 197  | 180 | 155  | 151 | 152   | 160  | 167      | 0.96     | 0.070099 | 177      | 0.90     | 0.408401 |
| 259199_s_at | A13g01240 | hypothetical protein similar to F16N3.1 F-box protein-related                             | 26  | 27   | 32   | 28   | 34   | 35  | 28  | 32   | 0.86     | 0.197893 | 22  | 21   | 26  | 22   | 15  | 20   | 38  | 23    | 102  | 0.936756 | 18       | 1.26     | 0.124167 |          |          |
| 259199_s_at | A13g01040 | hypothetical protein similar to hccr hccr beta cyclase (LYC)                              | 216 | 313  | 322  | 334  | 289  | 216 | 216 | 216  | 0.86     | 0.370963 | 257 | 238  | 240 | 366  | 298 | 280  | 281 | 302   | 248  | 326      | 0.81     | 0.062254 | 316      | 0.78     | 0.007603 |
| 259199_s_at | A13g01020 | putative cytoskeleton-associated protein tubulin folding cofactor B                       | 337 | 453  | 486  | 487  | 549  | 457 | 425 | 498  | 0.85     | 0.242282 | 392 | 476  | 469 | 635  | 497 | 462  | 457 | 429   | 446  | 496      | 0.90     | 0.371274 | 531      | 0.84     | 0.220414 |
| 259199_s_at | A13g01020 | unknown protein similar to ankryrin like c dehydration-responsive protein-related         | 40  | 64   | 72   | 82   | 64   | 63  | 73  | 0.86 | 0.490222 | 66       | 61  | 76   | 84  | 89   | 78  | 77   | 77  | 68    | 77   | 77       | 0.88     | 0.082492 | 77       | 0.88     | 0.199904 |
| 259199_s_at | A13g01010 | calmodulin-like protein similar to calmodulin, putative                                   | 635 | 589  | 799  | 824  | 1023 | 748 | 674 | 865  | 0.78     | 0.140225 | 874 | 1213 | 930 | 1268 | 892 | 1024 | 966 | 947   | 1006 | 1019     | 0.99     | 0.908815 | 1061     | 0.95     | 0.732592 |
| 259199_s_at | A13g01010 | hypothetical protein predicted by geneX motor protein-related                             | 19  | 28   | 19   | 28   | 37   | 23  | 11  | 29   | 0.72     | 0.160975 | 13  | 12   | 16  | 13   | 12  | 15   | 14  | 13    | 13   | 1.04     | 0.645302 | 13       | 1.08     | 0.490802 |          |
| 259199_s_at | A13g01010 | hypothetical protein predicted by geneX kinase motor protein-related                      | 111 | 157  | 139  | 154  | 177  | 122 | 136 | 151  | 0.90     | 0.505249 | 105 | 85   | 107 | 133  | 111 | 89   | 111 | 115   | 99   | 112      | 0.89     | 0.279402 | 111      | 0.89     | 0.459361 |
| 259199_s_at | A13g01030 | putative alcohol-3-hydroxylase dehydro alcohol-3-hydroxylase dehydrogenase, o             | 178 | 226  | 227  | 239  | 313  | 232 | 210 | 262  | 0.80     | 0.169087 | 219 | 201  | 218 | 290  | 228 | 193  | 248 | 241   | 213  | 240      | 0.89     | 0.243533 | 237      | 0.90     | 0.440057 |
| 259199_s_at | A13g01030 | putative RNA binding protein similar to pumilio/Puf RNA-binding domain-contains           | 84  | 145  | 140  | 172  | 189  | 134 | 126 | 165  | 0.77     | 0.178465 | 103 | 91   | 108 | 148  | 136 | 116  | 111 | 98    | 101  | 122      | 0.82     | 0.137732 | 133      | 0.75     | 0.038003 |
| 259199_s_at | A13g01030 | putative RNA binding protein similar to pumilio/Puf RNA-binding domain-contains           | 179 | 251  | 242  | 284  | 314  | 234 | 277 | 318  | 0.80     | 0.193648 | 233 | 235  | 246 | 296  | 251 | 246  | 296 | 288   | 248  | 295      | 0.81     | 0.021911 | 302      | 0.80     | 0.007603 |
| 259199_s_at | A13g01030 | putative phenylalanine ammonia-lyase phenylalanine ammonia-lyase, putative                | 26  | 25   | 37   | 36   | 32   | 27  | 30  | 32   | 0.93     | 0.643221 | 23  | 23   | 29  | 23   | 24  | 22   | 24  | 23    | 25   | 23       | 1.08     | 0.310809 | 23       | 1.08     | 0.453675 |
| 259199_s_at | A13g01030 | unknown protein similar to unknown c expressed protein                                    | 23  | 16   | 18   | 17   | 23   | 19  | 19  | 19   | 0.96     | 0.804460 | 14  | 12   | 17  | 22   | 19  | 21   | 21  | 21    | 21   | 0.70     | 0.003182 | 21       | 0.69     | 0.025141 |          |
| 259199_s_at | A13g01030 | kinase-like protein similar to carboxy-t kinase motor protein-related                     | 92  | 119  | 105  | 123  | 131  | 98  | 105 | 117  | 0.90     | 0.389482 | 74  | 59   | 80  | 92   | 82  | 63   | 67  | 62    | 71   | 73       | 0.97     | 0.798520 | 79       | 0.90     | 0.478967 |
| 259199_s_at | A13g01010 | hypothetical protein similar to putative c c expressed protein                            | 234 | 284  | 268  | 244  | 269  | 246 | 227 | 253  | 0.90     | 0.387499 | 221 | 252  | 278 | 350  | 263 | 283  | 284 | 268   | 261  | 286      | 0.91     | 0.381202 | 299      | 0.87     | 0.310802 |
| 259199_s_at | A13g01010 | unknown protein - supported by full-len expressed protein                                 | 157 | 206  | 270  | 259  | 265  | 239 | 211 | 242  | 0.95     | 0.787941 | 227 | 239  | 241 | 328  | 254 | 241  | 264 | 255   | 231  | 264      | 0.82     | 0.254151 | 294      | 0.83     | 0.150686 |
| 259199_s_at | A13g01020 | unknown protein similar to unknown c c expressed protein                                  | 239 | 484  | 512  | 553  | 632  | 475 | 445 | 554  | 0.80     | 0.196826 | 453 | 496  | 445 | 704  | 624 | 605  | 588 | 564   | 465  | 617      | 0.75     | 0.004161 | 644      | 0.72     | 0.006353 |
| 259199_s_at | A13g01030 | transcription initiation factor IIB (TFIIB) transcription initiation factor IIB-2 / geneX | 162 | 183  | 184  | 215  | 232  | 200 | 170 | 216  | 0.79     | 0.051768 | 174 | 184  | 189 | 291  | 216 | 219  | 214 | 201   | 182  | 228      | 0.80     | 0.076661 | 242      | 0.75     | 0.074044 |
| 259199_s_at | A13g01030 | hypothetical protein predicted by geneX exocyst complex component-related                 | 245 | 356  | 336  | 356  | 409  | 322 | 319 | 362  | 0.88     | 0.315704 | 244 | 213  | 247 | 280  | 240 | 262  | 250 | 235   | 246  | 265      | 0.95     | 0.583065 | 240      | 0.98     | 0.057001 |
| 259199_s_at | A13g01030 | hypothetical protein predicted by geneX c2 domain-containing protein                      | 19  | 16   | 22   | 23   | 19   | 21  | 19  | 21   | 0.80     | 0.336710 | 14  | 17   | 19  | 16   | 15  | 17   | 14  | 17    | 14   | 1.01     | 0.655324 | 16       | 0.98     | 0.360381 |          |
| 259199_s_at | A13g05430 | hypothetical protein predicted by geneX PFWWP domain-containing protein                   | 144 | 179  | 165  | 221  | 238  | 188 | 160 | 216  | 0.74     | 0.028059 | 140 | 124  | 151 | 218  | 185 | 147  | 200 | 190</ |      |          |          |          |          |          |          |

|           |           |                                                                                                                                                          |      |      |      |      |      |       |      |      |       |          |      |      |      |      |      |      |      |      |          |      |      |          |      |      |          |
|-----------|-----------|----------------------------------------------------------------------------------------------------------------------------------------------------------|------|------|------|------|------|-------|------|------|-------|----------|------|------|------|------|------|------|------|------|----------|------|------|----------|------|------|----------|
| 250088_at | A13g04970 | unknown protein, contains TNFRNGF: zinc finger (DHHC type) family protein                                                                                | 96   | 104  | 140  | 146  | 158  | 135   | 114  | 146  | 0.78  | 0.100095 | 88   | 101  | 121  | 153  | 109  | 111  | 105  | 100  | 103      | 115  | 0.89 | 0.434937 | 124  | 0.83 | 0.285220 |
| 250089_at | A13g04960 | hyothetical protein similar to GB-CAB1: expressed protein                                                                                                | 788  | 1044 | 1067 | 987  | 1062 | 821   | 966  | 957  | 0.101 | 0.938754 | 879  | 786  | 888  | 1188 | 1000 | 871  | 1136 | 1072 | 851      | 1053 | 0.81 | 0.040661 | 109  | 0.83 | 0.160301 |
| 250090_at | A13g04920 | autative ribosomal protein s19 or s24 s 40S ribosomal protein S24 (RPS24A)                                                                               | 2090 | 2513 | 2718 | 2765 | 2707 | 2429  | 2440 | 2634 | 0.93  | 0.412009 | 2293 | 2458 | 2487 | 3262 | 2514 | 2461 | 2493 | 2439 | 2412     | 2634 | 0.92 | 0.342367 | 2745 | 0.88 | 0.279307 |
| 250091_at | A13g04960 | hyothetical protein predicted by geneF expressed protein                                                                                                 | 113  | 165  | 185  | 164  | 179  | 144   | 164  | 159  | 0.79  | 0.889277 | 168  | 158  | 170  | 267  | 203  | 216  | 201  | 184  | 201      | 193  | 0.81 | 0.113090 | 221  | 0.81 | 0.046509 |
| 250092_at | A13g04870 | autative zeta-carotene desaturase ornc zeta-carotene desaturase (ZDS11)/carot                                                                            | 2590 | 2677 | 369  | 395  | 461  | 310   | 331  | 389  | 0.85  | 0.374168 | 368  | 248  | 290  | 392  | 371  | 321  | 394  | 357  | 282      | 367  | 0.77 | 0.008444 | 362  | 0.78 | 0.045058 |
| 250093_at | A13g04860 | unknown protein similar to putative proly expressed protein                                                                                              | 112  | 129  | 150  | 152  | 161  | 135   | 130  | 149  | 0.87  | 0.234847 | 128  | 129  | 138  | 157  | 129  | 137  | 160  | 145  | 132      | 146  | 0.90 | 0.136684 | 141  | 0.93 | 0.348770 |
| 250094_at | A13g04940 | putative cyrtine synthase similar to cy cyrtine synthase, putative / O-acetylase                                                                         | 173  | 277  | 225  | 346  | 425  | 306   | 225  | 359  | 0.63  | 0.043560 | 330  | 386  | 367  | 586  | 545  | 648  | 529  | 503  | 381      | 520  | 0.69 | 0.003887 | 523  | 0.69 | 0.026236 |
| 250095_at | A13g04980 | putative protein precursor A44 is acyl carrier protein 1, chloroplast (ACP-1                                                                             | 331  | 449  | 577  | 665  | 570  | 398   | 398  | 474  | 0.74  | 0.045456 | 415  | 449  | 517  | 779  | 649  | 519  | 512  | 519  | 512      | 519  | 0.78 | 0.140225 | 649  | 0.71 | 0.093778 |
| 250096_at | A13g04840 | autative 40S ribosomal protein S3A (S 40S ribosomal protein S3A (RPS3SA)                                                                                 | 2547 | 2877 | 2848 | 3097 | 3287 | 2884  | 2757 | 3090 | 0.89  | 0.018191 | 2715 | 2809 | 3166 | 3676 | 3315 | 2726 | 2989 | 2977 | 2897     | 3137 | 0.92 | 0.356778 | 3239 | 0.89 | 0.329673 |
| 250097_at | A13g04830 | unknown protein similar to GB-ADD91 expressed protein                                                                                                    | 286  | 319  | 330  | 415  | 422  | 331   | 312  | 389  | 0.80  | 0.073166 | 329  | 401  | 373  | 554  | 433  | 414  | 396  | 373  | 368      | 434  | 0.85 | 0.189601 | 467  | 0.79 | 0.111001 |
| 250098_at | A13g04790 | autative ribose 5-phosphate isomerase ribose 5-phosphate isomerase-related                                                                               | 273  | 370  | 315  | 495  | 438  | 388   | 319  | 440  | 0.72  | 0.044453 | 422  | 429  | 490  | 765  | 607  | 551  | 574  | 552  | 447      | 610  | 0.73 | 0.026334 | 641  | 0.70 | 0.045250 |
| 250099_at | A13g05010 | unknown protein similar to GB-AB810 transmembrane protein, putative                                                                                      | 251  | 385  | 397  | 466  | 479  | 366   | 344  | 437  | 0.79  | 0.092225 | 375  | 386  | 362  | 623  | 484  | 459  | 506  | 506  | 474      | 509  | 0.73 | 0.014270 | 522  | 0.72 | 0.045529 |
| 250100_at | A13g04880 | DNA-damage-repair/interleukin protein 1 DNA-damage-repair/interleukin protein (C                                                                         | 231  | 292  | 292  | 368  | 363  | 332   | 272  | 351  | 0.77  | 0.033450 | 305  | 339  | 329  | 496  | 385  | 343  | 360  | 354  | 324      | 388  | 0.84 | 0.144709 | 408  | 0.79 | 0.046384 |
| 250101_at | A13g11640 | hyothetical protein predicted by geneF expressed protein                                                                                                 | 36   | 46   | 54   | 45   | 66   | 51    | 45   | 54   | 0.83  | 0.331650 | 50   | 47   | 38   | 47   | 46   | 46   | 60   | 50   | 45       | 49   | 0.92 | 0.417779 | 45   | 1.00 | 0.972497 |
| 250102_at | A13g11660 | unknown protein similar to hin1 GB-CAB: harpin-induced family protein / HIN1 fam                                                                         | 51   | 71   | 79   | 150  | 138  | 124   | 67   | 137  | 0.49  | 0.003701 | 104  | 103  | 107  | 224  | 176  | 172  | 158  | 132  | 105      | 173  | 0.61 | 0.014699 | 191  | 0.55 | 0.009867 |
| 250103_at | A13g11690 | unknown protein - supported by cDNA: expressed protein                                                                                                   | 195  | 232  | 276  | 347  | 372  | 321   | 234  | 347  | 0.68  | 0.015465 | 237  | 259  | 250  | 431  | 317  | 302  | 340  | 323  | 249      | 343  | 0.73 | 0.022867 | 350  | 0.71 | 0.006790 |
| 250104_at | A13g11710 | lvsiv-RNA synthase identical to lvsiv-RNA synthase, autative / lysine-<br>dialactosylviadivolecerol synthase ide dialactosylviadivolecerol synthase 1 (D | 1173 | 1360 | 1308 | 1400 | 1576 | 1367  | 1280 | 1478 | 0.87  | 0.074574 | 1152 | 954  | 1258 | 1421 | 1258 | 1028 | 1190 | 1197 | 1121     | 1219 | 0.92 | 0.395910 | 1236 | 0.91 | 0.473674 |
| 250107_at | A13g11670 | unknown protein similar to hin1 GB-CAB: harpin-induced family protein / HIN1 fam                                                                         | 279  | 361  | 378  | 447  | 477  | 366   | 339  | 430  | 0.79  | 0.113524 | 304  | 244  | 338  | 484  | 392  | 329  | 351  | 329  | 294      | 377  | 0.78 | 0.105881 | 402  | 0.73 | 0.109894 |
| 250107_at | A13g11650 | unknown protein similar to hin1 GB-CAB: harpin-induced family protein / HIN1 fam                                                                         | 419  | 370  | 407  | 461  | 468  | 371   | 399  | 433  | 0.92  | 0.373938 | 370  | 390  | 402  | 486  | 377  | 345  | 392  | 351  | 387      | 390  | 0.99 | 0.928494 | 403  | 0.96 | 0.739597 |
| 250107_at | A13g11700 | unknown protein similar to unknown pr beta-Ig-H3 domain-containing protein (f                                                                            | 343  | 276  | 291  | 383  | 424  | 338   | 304  | 382  | 0.79  | 0.071319 | 270  | 239  | 283  | 319  | 230  | 192  | 313  | 310  | 264      | 273  | 0.87 | 0.810138 | 247  | 1.07 | 0.695354 |
| 250104_at | A13g03450 | RGAI-like protein similar to RGAI1 proly ubiquitinone response modulator, putative                                                                       | 299  | 291  | 284  | 599  | 763  | 535   | 261  | 636  | 0.41  | 0.000936 | 242  | 240  | 259  | 476  | 395  | 329  | 399  | 381  | 247      | 396  | 0.62 | 0.003544 | 401  | 0.62 | 0.024243 |
| 250104_at | A13g03440 | unknown protein similar to putative rod unknown protein similar to putative rod                                                                          | 48   | 55   | 56   | 61   | 77   | 57    | 53   | 65   | 0.82  | 0.144139 | 50   | 46   | 45   | 49   | 43   | 38   | 44   | 41   | 47       | 43   | 1.09 | 0.195617 | 43   | 1.08 | 0.376358 |
| 250104_at | A13g03430 | collen alleron Bra r II identical to collc collactin, autative / calcium-binding coll                                                                    | 36   | 34   | 36   | 33   | 50   | 26    | 35   | 37   | 0.96  | 0.854126 | 22   | 24   | 21   | 36   | 30   | 32   | 26   | 23   | 29       | 27   | 0.77 | 0.082119 | 33   | 0.69 | 0.007463 |
| 250104_at | A13g03410 | calmodulin-like protein similar to calmic calmodulin-related protein, putative                                                                           | 19   | 20   | 26   | 27   | 27   | 23    | 21   | 26   | 0.83  | 0.172887 | 16   | 17   | 16   | 20   | 14   | 17   | 12   | 20   | 17       | 17   | 1.00 | 0.993042 | 17   | 0.98 | 0.878995 |
| 250104_at | A13g03400 | calmodulin-like protein similar to calmic calmodulin-related protein, putative                                                                           | 22   | 24   | 36   | 30   | 29   | 26    | 27   | 28   | 0.96  | 0.824568 | 27   | 30   | 29   | 14   | 11   | 24   | 19   | 17   | 29       | 17   | 1.68 | 0.010363 | 16   | 1.74 | 0.045636 |
| 250104_at | A13g03390 | unknown protein - supported by cDNA: expressed protein                                                                                                   | 426  | 545  | 589  | 507  | 601  | 427   | 520  | 511  | 1.02  | 0.908019 | 407  | 364  | 437  | 537  | 469  | 346  | 521  | 512  | 403      | 477  | 0.84 | 0.176607 | 451  | 0.89 | 0.465462 |
| 250104_at | A13g03380 | DeoP protease contains similarity to de DeoP protease, putative                                                                                          | 96   | 130  | 122  | 162  | 182  | 119   | 116  | 154  | 0.75  | 0.145113 | 44   | 44   | 48   | 59   | 59   | 50   | 59   | 47   | 45       | 55   | 0.82 | 0.033930 | 56   | 0.80 | 0.027532 |
| 250104_at | A13g03370 | unknown protein - supported by cDNA: expressed protein                                                                                                   | 39   | 59   | 57   | 57   | 61   | 55    | 52   | 57   | 0.90  | 0.444577 | 34   | 42   | 41   | 56   | 46   | 36   | 44   | 42   | 39       | 45   | 0.87 | 0.256858 | 46   | 0.85 | 0.316910 |
| 250105_at | A13g03360 | hyothetical protein similar to GB-AAC: short-chain dehydrogenase/reductase (S                                                                            | 122  | 148  | 154  | 172  | 207  | 152   | 142  | 177  | 0.80  | 0.134880 | 130  | 129  | 141  | 162  | 161  | 135  | 170  | 157  | 133      | 163  | 0.82 | 0.056567 | 163  | 0.82 | 0.152738 |
| 250105_at | A13g03350 | unknown protein - supported by cDNA: expressed protein                                                                                                   | 517  | 412  | 473  | 542  | 381  | 308   | 407  | 462  | 0.80  | 0.318729 | 503  | 517  | 503  | 517  | 503  | 517  | 503  | 517  | 503      | 517  | 0.80 | 0.070335 | 574  | 0.78 | 0.016368 |
| 250105_at | A13g03490 | unknown protein - peroxisomal protein PEX19 family protein                                                                                               | 296  | 378  | 362  | 370  | 384  | 294   | 345  | 349  | 0.99  | 0.917171 | 358  | 368  | 385  | 500  | 427  | 365  | 391  | 355  | 382      | 370  | 0.99 | 0.305584 | 430  | 0.86 | 0.204666 |
| 250105_at | A13g03320 | unknown protein similar to putative rod unknown protein similar to putative rod                                                                          | 162  | 267  | 289  | 288  | 304  | 268   | 239  | 287  | 0.83  | 0.310490 | 232  | 266  | 257  | 363  | 266  | 271  | 274  | 263  | 252      | 287  | 0.88 | 0.224297 | 300  | 0.84 | 0.217414 |
| 250105_at | A13g03480 | putative hypersensitivity-related gene s transferase family protein                                                                                      | 12   | 11   | 18   | 15   | 15   | 14    | 14   | 15   | 0.93  | 0.659919 | 8    | 10   | 11   | 15   | 12   | 13   | 13   | 12   | 10       | 13   | 0.73 | 0.081827 | 13   | 0.72 | 0.033725 |
| 250105_at | A13g03340 | unknown protein - supported by cDNA: LUC7 N terminus domain-containing on                                                                                | 379  | 381  | 379  | 470  | 389  | 347   | 402  | 385  | 0.82  | 0.294736 | 397  | 362  | 425  | 546  | 476  | 419  | 447  | 430  | 365      | 464  | 0.85 | 0.085217 | 481  | 0.82 | 0.070712 |
| 250105_at | A13g03420 | hyothetical protein similar to Ku70-bin Ku70-binding family protein                                                                                      | 126  | 173  | 175  | 174  | 213  | 159   | 159  | 182  | 0.88  | 0.361155 | 158  | 166  | 186  | 258  | 214  | 200  | 180  | 180  | 170      | 208  | 0.82 | 0.090578 | 224  | 0.76 | 0.051316 |
| 250105_at | A13g03310 | unknown protein - supported by cDNA: lecithin:cholesterol acyltransferase fami                                                                           | 169  | 241  | 302  | 267  | 296  | 218   | 236  | 260  | 0.91  | 0.625842 | 265  | 242  | 248  | 345  | 290  | 266  | 314  | 297  | 252      | 303  | 0.83 | 0.032919 | 300  | 0.84 | 0.119308 |
| 250105_at | A13g03470 | putative cytochrome P450 similar to cy cytochrome P450, putative                                                                                         | 351  | 61   | 66   | 97   | 118  | 84    | 52   | 100  | 0.52  | 0.019188 | 45   | 56   | 42   | 110  | 99   | 72   | 125  | 107  | 48       | 103  | 0.46 | 0.040044 | 94   | 0.51 | 0.019833 |
| 250105_at | A13g07300 | hyothetical protein predicted by geneF expressed protein                                                                                                 | 254  | 363  | 367  | 353  | 338  | 310   | 321  | 357  | 0.90  | 0.459066 | 299  | 342  | 328  | 446  | 367  | 327  | 336  | 323  | 362      | 362  | 0.82 | 0.255651 | 346  | 0.82 | 0.196398 |
| 250106_at | A13g07400 | hyothetical protein similar to putative cisc lipase class 3 family protein                                                                               | 331  | 433  | 436  | 412  | 480  | 387   | 400  | 426  | 0.94  | 0.588135 | 237  | 182  | 239  | 235  | 252  | 211  | 297  | 275  | 219      | 254  | 0.86 | 0.200894 | 233  | 0.94 | 0.576497 |
| 250106_at | A13g07410 | autative GTP-binding domain similar to Ras-related GTP-binding family protein                                                                            | 294  | 357  | 332  | 468  | 466  | 358   | 328  | 430  | 0.76  | 0.068532 | 270  | 269  | 314  | 543  | 470  | 406  | 374  | 354  | 285      | 429  | 0.66 | 0.022489 | 473  | 0.60 | 0.011354 |
| 250106_at | A13g07440 | unknown protein est hits to oscanen mc expressed protein                                                                                                 | 259  | 335  | 300  | 282  | 285  | 259   | 298  | 275  | 1.08  | 0.388436 | 317  | 330  | 340  | 424  | 353  | 361  | 339  | 349  | 329      | 365  | 0.90 | 0.131262 | 379  | 0.87 | 0.098799 |
| 250106_at | A13g07450 | autative 5B-anther specific protein siml rosette inhibitor/seed storage/gliad tran                                                                       | 35   | 33   | 37   | 38   | 35   | 37    | 35   | 37   | 0.94  | 0.224300 | 28   | 32   | 35   | 26   | 24   | 32   | 29   | 1.11 | 0.323012 | 26   | 1.23 | 0.054971 |      |      |          |
| 250106_at | A13g07400 | autative calmodulin similar to calmodul calcium-binding protein, putative                                                                                | 20   | 28   | 31   | 30   | 23   | 30    | 27   | 30   | 0.91  | 0.557353 | 15   | 17   | 24   | 19   | 19   | 19   | 19   | 19   | 19       | 19   | 1.00 | 0.189143 | 17   | 1.06 | 0.373868 |
| 250106_at | A13g07520 | unknown protein similar to putative ald glutamate receptor family protein (GLR1                                                                          | 41   | 46   | 48   | 57   | 63   | 48    | 45   | 56   | 0.80  | 0.078185 | 47   | 45   | 47   | 60   | 65   | 60   | 57   | 59   | 46       | 60   | 0.77 | 0.002051 | 62   | 0.75 | 0.000766 |
| 250106_at | A13g07530 | hyothetical protein predicted by geneF expressed protein                                                                                                 | 91   | 110  | 116  | 120  | 124  | 109   | 106  | 118  | 0.90  | 0.255162 | 83   | 80   | 88   | 98   | 84   | 75   | 83   | 88   | 83       | 86   | 0.97 | 0.675877 | 86   | 0.97 | 0.747370 |
| 250107_at | A13g07550 | F-box protein family. AIFBL12 contains F-box family protein (FBL12)                                                                                      | 93   | 122  | 136  | 128  | 152  | 112   | 117  | 131  | 0.90  | 0.476005 | 99   | 69   | 111  | 131  | 116  | 104  | 118  | 118  | 100      | 117  | 0.85 | 0.053864 | 117  | 0.85 | 0.164134 |
| 250107_at | A13g07560 | unknown protein - supported by cDNA: glycin-rich protein                                                                                                 | 223  | 306  | 330  | 336  | 337  | 308</ |      |      |       |          |      |      |      |      |      |      |      |      |          |      |      |          |      |      |          |

|           |           |                                                                                                |     |     |      |      |      |      |     |      |      |          |      |      |      |      |      |      |      |      |      |      |          |          |          |          |          |          |
|-----------|-----------|------------------------------------------------------------------------------------------------|-----|-----|------|------|------|------|-----|------|------|----------|------|------|------|------|------|------|------|------|------|------|----------|----------|----------|----------|----------|----------|
| 258993_at | A13g08940 | putative chlorophyll a/b-binding protein chlorophyll A-B binding protein (LHCB4).              | 302 | 627 | 611  | 525  | 543  | 353  | 513 | 474  | 1.08 | 0.761329 | 370  | 510  | 407  | 713  | 533  | 567  | 598  | 576  | 429  | 597  | 0.72     | 0.016666 | 604      | 0.71     | 0.065008 |          |
| 258994_at | A13g08850 | putative ribosomal protein similar to putative uua translocating family protein / WD-40 repeat | 163 | 272 | 222  | 236  | 249  | 199  | 186 | 228  | 0.82 | 0.150161 | 177  | 160  | 187  | 211  | 180  | 155  | 186  | 177  | 174  | 182  | 0.96     | 0.606886 | 182      | 0.96     | 0.698268 |          |
| 258995_at | A13g01790 | putative ribosomal protein L13 similar to ribosomal protein L13 family protein                 | 695 | 874 | 947  | 1006 | 1136 | 961  | 839 | 1034 | 0.81 | 0.099633 | 962  | 1113 | 1107 | 1485 | 1211 | 1129 | 1127 | 1094 | 1061 | 1209 | 0.88     | 0.194541 | 1275     | 0.83     | 0.143881 |          |
| 258996_at | A13g01790 | putative ribosomal protein L13 similar to ribosomal protein L13 family protein                 | 695 | 874 | 947  | 1006 | 1136 | 961  | 839 | 1034 | 0.81 | 0.099633 | 962  | 1113 | 1107 | 1485 | 1211 | 1129 | 1127 | 1094 | 1061 | 1209 | 0.88     | 0.194541 | 1275     | 0.83     | 0.143881 |          |
| 258997_at | A13g01810 | putative ribosomal protein similar to unknown expressed protein                                | 322 | 451 | 389  | 548  | 566  | 421  | 387 | 511  | 0.76 | 0.130320 | 319  | 231  | 344  | 400  | 352  | 273  | 341  | 352  | 298  | 341  | 0.87     | 0.268300 | 341      | 0.87     | 0.441717 |          |
| 258998_at | A13g01820 | putative adenylyl kinase similar to Adl adenylyl kinase family protein                         | 106 | 114 | 158  | 152  | 178  | 135  | 126 | 155  | 0.81 | 0.230514 | 141  | 177  | 147  | 221  | 165  | 178  | 167  | 164  | 155  | 179  | 0.87     | 0.195076 | 188      | 0.82     | 0.177829 |          |
| 258999_at | A13g01850 | putative D-ribulose-5-phosphate 3-epimerase (ribulose-phosphate 3-epimerase, cyto              | 148 | 223 | 208  | 239  | 274  | 216  | 193 | 243  | 0.79 | 0.150762 | 230  | 276  | 233  | 384  | 298  | 283  | 277  | 281  | 246  | 305  | 0.81     | 0.090738 | 322      | 0.77     | 0.096169 |          |
| 259000_at | A13g01850 | putative D-ribulose-5-phosphate 3-epimerase (ribulose-phosphate 3-epimerase, cyto              | 148 | 223 | 208  | 239  | 274  | 216  | 193 | 243  | 0.79 | 0.150762 | 230  | 276  | 233  | 384  | 298  | 283  | 277  | 281  | 246  | 305  | 0.81     | 0.090738 | 322      | 0.77     | 0.096169 |          |
| 259001_at | A13g01960 | hypothetical protein predicted by oensc expressed protein                                      | 66  | 104 | 71   | 108  | 115  | 66   | 104 | 71   | 1.08 | 0.098232 | 82   | 82   | 79   | 86   | 111  | 134  | 102  | 110  | 134  | 110  | 0.86     | 0.026530 | 138      | 0.84     | 0.045853 |          |
| 259002_at | A13g02000 | hypothetical protein predicted by oensc expressed protein                                      | 17  | 22  | 25   | 22   | 22   | 24   | 21  | 23   | 0.93 | 0.542631 | 19   | 15   | 23   | 15   | 15   | 20   | 20   | 19   | 18   | 18   | 1.04     | 0.717782 | 17       | 1.13     | 0.392483 |          |
| 259003_at | A13g02000 | putative glutathione S-transferase similar to glutathione S-transferase family protein         | 103 | 79  | 128  | 87   | 104  | 92   | 103 | 94   | 1.09 | 0.588919 | 45   | 47   | 56   | 55   | 45   | 13   | 43   | 64   | 56   | 49   | 0.94     | 0.588661 | 48       | 1.03     | 0.798735 |          |
| 259004_at | A13g02010 | hypothetical protein similar to hvhoeth centariolacetoide (PPR) repeat-containin               | 52  | 50  | 75   | 77   | 76   | 69   | 60  | 74   | 0.82 | 0.167285 | 48   | 44   | 62   | 74   | 55   | 55   | 68   | 63   | 51   | 63   | 0.82     | 0.118695 | 61       | 0.84     | 0.308712 |          |
| 259005_at | A13g01840 | putative protein kinase C-terminal serine kinase protein kinase family protein                 | 32  | 34  | 30   | 41   | 40   | 45   | 31  | 42   | 0.74 | 0.002811 | 21   | 24   | 29   | 29   | 23   | 24   | 27   | 25   | 26   | 26   | 0.95     | 0.624185 | 25       | 0.98     | 0.672370 |          |
| 259006_at | A13g01930 | unknown protein similar to nodule-spec nodulin family protein                                  | 35  | 38  | 36   | 55   | 37   | 38   | 36  | 50   | 0.72 | 0.077402 | 27   | 35   | 24   | 34   | 30   | 28   | 37   | 32   | 29   | 32   | 0.90     | 0.338913 | 30       | 0.94     | 0.655115 |          |
| 259007_at | A13g01990 | unknown protein similar to uridylyl tran ACT domain-containing protein (ACR6)                  | 37  | 44  | 57   | 63   | 62   | 56   | 46  | 60   | 0.76 | 0.078409 | 39   | 34   | 38   | 42   | 38   | 36   | 40   | 39   | 37   | 39   | 0.94     | 0.271376 | 39       | 0.96     | 0.507349 |          |
| 259008_at | A13g01920 | hypothetical protein predicted by oensc yrdC family protein                                    | 99  | 134 | 159  | 143  | 170  | 140  | 131 | 151  | 0.87 | 0.370054 | 102  | 110  | 112  | 137  | 110  | 116  | 122  | 120  | 108  | 121  | 0.99     | 0.090915 | 121      | 0.89     | 0.218103 |          |
| 259009_at | A13g01900 | putative cytochrome P450 similar to cvt cytochrome P450 family protein                         | 27  | 21  | 28   | 31   | 35   | 34   | 25  | 33   | 0.76 | 0.028702 | 21   | 24   | 27   | 24   | 26   | 22   | 26   | 22   | 24   | 23   | 1.03     | 0.628263 | 23       | 1.04     | 0.641090 |          |
| 259010_at | A13g01890 | unknown protein similar to brahma ass SWi6 complex BAF600 domain-containi                      | 123 | 123 | 123  | 127  | 146  | 109  | 128 | 127  | 1.01 | 0.951444 | 100  | 63   | 108  | 119  | 98   | 108  | 108  | 97   | 107  | 0.91 | 0.243751 | 105      | 0.92     | 0.446638 |          |          |
| 259011_at | A13g01970 | putative WRKY-like transcriptional reu. WRKY family transcription factor                       | 33  | 34  | 45   | 37   | 37   | 38   | 38  | 37   | 1.01 | 0.935511 | 32   | 34   | 36   | 28   | 26   | 22   | 39   | 33   | 34   | 30   | 1.11     | 0.357990 | 27       | 1.27     | 0.090981 |          |
| 259012_at | A13g01980 | putative dehydrogenase contains Pfam short-chain dehydrogenase/reductase (S                    | 212 | 314 | 276  | 507  | 531  | 448  | 267 | 495  | 0.54 | 0.004127 | 336  | 396  | 379  | 899  | 662  | 620  | 566  | 534  | 370  | 656  | 0.56     | 0.016715 | 727      | 0.51     | 0.015803 |          |
| 259013_at | A13g02020 | putative aspartate kinase similar to asp aspartate kinase, lysine-sensitive, puta              | 152 | 215 | 177  | 238  | 263  | 211  | 181 | 238  | 0.76 | 0.076746 | 165  | 170  | 179  | 243  | 187  | 180  | 186  | 171  | 196  | 196  | 0.88     | 0.180551 | 204      | 0.84     | 0.175726 |          |
| 259014_at | A13g01830 | hypothetical protein similar to calmodul calmodulin-related protein, putative                  | 5   | 10  | 7    | 11   | 7    | 11   | 7   | 10   | 0.72 | 0.263043 | 6    | 7    | 5    | 6    | 4    | 6    | 6    | 5    | 5    | 1.13 | 0.411502 | 5        | 1.25     | 0.260784 |          |          |
| 259015_at | A13g01910 | putative sulfite oxidase similar to sulfite sulfite oxidase, putative                          | 645 | 916 | 907  | 1060 | 1137 | 893  | 823 | 1030 | 0.80 | 0.144227 | 901  | 966  | 920  | 1401 | 1086 | 1032 | 1038 | 984  | 929  | 1108 | 0.84     | 0.127208 | 1173     | 0.79     | 0.105282 |          |
| 259016_at | A13g01370 | unknown protein expressed protein                                                              | 139 | 227 | 193  | 186  | 215  | 163  | 186 | 188  | 0.99 | 0.953600 | 174  | 168  | 178  | 199  | 180  | 147  | 205  | 207  | 173  | 188  | 0.92     | 0.379124 | 176      | 0.90     | 0.901541 |          |
| 259017_at | A13g01460 | unknown protein contains Pfam profile: PHD finger family protein / methyl-CoG I                | 207 | 272 | 275  | 298  | 324  | 267  | 251 | 296  | 0.85 | 0.178950 | 139  | 115  | 144  | 192  | 170  | 135  | 168  | 145  | 133  | 162  | 0.82     | 0.097989 | 166      | 0.80     | 0.158061 |          |
| 259018_at | A13g01380 | putative phosphatidylinositol 3-kinase class N (PI3K) class N (PI3K)                           | 171 | 182 | 209  | 226  | 235  | 191  | 188 | 217  | 0.86 | 0.168765 | 83   | 75   | 99   | 104  | 89   | 81   | 112  | 105  | 85   | 98   | 0.87     | 0.221660 | 91       | 0.94     | 0.596907 |          |
| 259019_at | A13g01410 | putative RNase H contains Pfam profile RNase H domain-containing protein                       | 249 | 301 | 309  | 340  | 385  | 272  | 287 | 332  | 0.86 | 0.293716 | 258  | 275  | 266  | 365  | 282  | 281  | 277  | 247  | 267  | 290  | 0.92     | 0.406630 | 309      | 0.86     | 0.207749 |          |
| 259020_at | A13g01430 | hypothetical protein predicted by oensc expressed protein                                      | 135 | 153 | 180  | 155  | 193  | 148  | 156 | 165  | 0.94 | 0.650858 | 123  | 138  | 120  | 177  | 132  | 125  | 163  | 147  | 127  | 149  | 0.85     | 0.159379 | 145      | 0.88     | 0.367079 |          |
| 259021_at | A13g01400 | unknown protein contains Pfam profile: armadillo/beta-catenin repeat family o                  | 138 | 237 | 276  | 288  | 264  | 221  | 234 | 251  | 0.93 | 0.588107 | 266  | 241  | 268  | 303  | 271  | 250  | 256  | 235  | 258  | 263  | 0.98     | 0.794308 | 275      | 0.94     | 0.413301 |          |
| 259022_at | A13g01450 | unknown protein - supported by full-length expressed protein                                   | 36  | 46  | 68   | 64   | 68   | 46   | 43  | 59   | 0.73 | 0.170988 | 34   | 40   | 48   | 56   | 51   | 44   | 51   | 46   | 41   | 50   | 0.82     | 0.082796 | 50       | 0.81     | 0.157287 |          |
| 259023_at | A13g01440 | hypothetical protein predicted by oensc oensc expressed protein                                | 39  | 43  | 59   | 43   | 59   | 43   | 59  | 43   | 1.04 | 0.857709 | 38   | 44   | 48   | 56   | 43   | 44   | 50   | 42   | 39   | 43   | 0.82     | 0.034463 | 43       | 0.82     | 0.034463 |          |
| 259024_at | A13g01420 | putative serine carboxypeptidase serine carboxypeptidase III, putative                         | 24  | 32  | 38   | 33   | 34   | 35   | 31  | 34   | 0.92 | 0.554412 | 24   | 25   | 24   | 34   | 18   | 21   | 32   | 25   | 24   | 26   | 0.92     | 0.613312 | 24       | 0.98     | 0.929431 |          |
| 259025_at | A13g01390 | vacuolar membrane ATPase subunit G vacuolar ATP synthase subunit G 1 (VA                       | 333 | 488 | 476  | 549  | 620  | 505  | 432 | 558  | 0.78 | 0.104890 | 375  | 385  | 362  | 491  | 406  | 425  | 355  | 367  | 374  | 409  | 0.91     | 0.324178 | 441      | 0.85     | 0.066285 |          |
| 259026_at | A13g01600 | putative amino acid transporter similar to amino acid permease family protein                  | 433 | 533 | 68   | 60   | 59   | 64   | 55  | 61   | 0.89 | 0.412217 | 38   | 48   | 54   | 48   | 37   | 48   | 56   | 50   | 46   | 48   | 0.97     | 0.803130 | 44       | 1.04     | 0.746145 |          |
| 259027_at | A13g01600 | hypothetical protein predicted by oensc expressed protein                                      | 33  | 33  | 33   | 33   | 33   | 33   | 33  | 33   | 0.76 | 0.036860 | 21   | 27   | 26   | 22   | 19   | 21   | 21   | 21   | 21   | 21   | 1.12     | 0.236457 | 21       | 1.20     | 0.129070 |          |
| 259028_at | A13g01580 | hypothetical protein similar to mva-mva mva family transcription factor                        | 33  | 37  | 56   | 51   | 49   | 52   | 42  | 51   | 0.83 | 0.291713 | 51   | 37   | 51   | 51   | 65   | 48   | 75   | 54   | 46   | 58   | 0.79     | 0.156481 | 54       | 0.85     | 0.315634 |          |
| 259029_at | A13g01570 | putative cytochrome P450 similar to cvt cytochrome P450, putative                              | 38  | 74  | 47   | 119  | 101  | 80   | 53  | 100  | 0.53 | 0.041087 | 40   | 42   | 46   | 112  | 82   | 60   | 73   | 64   | 43   | 78   | 0.55     | 0.029919 | 85       | 0.50     | 0.052080 |          |
| 259030_at | A13g01550 | putative myotubularin similar to myotub expressed protein                                      | 184 | 209 | 314  | 280  | 330  | 243  | 266 | 284  | 0.93 | 0.715703 | 216  | 179  | 216  | 248  | 217  | 198  | 244  | 229  | 204  | 227  | 0.90     | 0.173748 | 221      | 0.92     | 0.471194 |          |
| 259031_at | A13g01540 | putative 3-phosphoinositide-dependent kinase-1 (PDK1) family protein                           | 84  | 102 | 104  | 116  | 123  | 91   | 97  | 110  | 0.82 | 0.295947 | 84   | 85   | 79   | 113  | 94   | 79   | 102  | 92   | 83   | 96   | 0.86     | 0.026925 | 95       | 0.87     | 0.202968 |          |
| 259032_at | A13g01530 | hypothetical protein similar to hvhoeth transducin family protein / WD-40 repeat               | 183 | 203 | 213  | 273  | 261  | 210  | 200 | 255  | 0.78 | 0.085169 | 111  | 111  | 146  | 206  | 165  | 157  | 167  | 176  | 142  | 123  | 169      | 0.73     | 0.031810 | 176      | 0.70     | 0.051230 |
| 259033_at | A13g01090 | putative DNA gyrase subunit A similar to DNA gyrase subunit A family protein                   | 362 | 487 | 486  | 524  | 568  | 478  | 445 | 523  | 0.85 | 0.186880 | 277  | 219  | 298  | 342  | 286  | 272  | 293  | 280  | 265  | 299  | 0.90     | 0.254578 | 300      | 0.88     | 0.327169 |          |
| 259034_at | A13g01070 | hypothetical protein predicted by oensc zinc finger (C2H2 type) family protein                 | 25  | 26  | 34   | 32   | 33   | 36   | 28  | 34   | 0.85 | 0.178389 | 22   | 27   | 31   | 29   | 21   | 24   | 32   | 22   | 27   | 26   | 1.04     | 0.747518 | 25       | 1.08     | 0.567182 |          |
| 259035_at | A13g01060 | hypothetical protein similar to hvhoeth serine carboxypeptidase family-related                 | 38  | 43  | 36   | 34   | 37   | 36   | 35  | 43   | 0.97 | 0.801522 | 25   | 38   | 22   | 23   | 25   | 21   | 23   | 25   | 23   | 23   | 0.82     | 0.249004 | 23       | 1.10     | 0.374989 |          |
| 259036_at | A13g01050 | hypothetical protein predicted by oensc heat shock protein-related                             | 64  | 68  | 107  | 125  | 140  | 129  | 86  | 131  | 0.86 | 0.027153 | 57   | 60   | 68   | 82   | 100  | 90   | 88   | 90   | 82   | 100  | 0.88     | 0.027235 | 90       | 0.80     | 0.021533 |          |
| 259037_at | A13g01040 | putative serine carboxypeptidase serine carboxypeptidase III, putative                         | 853 | 930 | 1194 | 1029 | 1441 | 1044 | 992 | 1171 | 0.85 | 0.350561 | 1068 | 956  | 1029 | 1206 | 1153 | 1114 | 1342 | 1238 | 1018 | 1211 | 0.84     | 0.015275 | 1158     | 0.88     | 0.029851 |          |
| 259038_at | A13g01040 | hypothetical protein predicted by gene RNA recognition motif (RRM)-containin                   | 67  | 89  | 88   | 90   | 106  | 80   | 82  | 92   | 0.89 | 0.327781 | 114  | 120  | 104  | 134  | 96   | 103  | 100  | 108  | 113  | 108  | 1.04     | 0.661968 | 111      | 1.01     | 0.901225 |          |
| 259039_at | A13g01030 | hypothetical protein similar to hvhoethi amine oxidase family protein / SWIRM d                | 72  | 85  | 83   | 84   | 102  | 83   | 80  | 89   | 0.89 | 0.263577 | 59   | 58   | 65   | 74   | 66   | 56   | 74   | 62   | 61   | 66   | 0.92     | 0.311820 | 66       | 0.93     | 0.465939 |          |
| 259040_at | A         |                                                                                                |     |     |      |      |      |      |     |      |      |          |      |      |      |      |      |      |      |      |      |      |          |          |          |          |          |          |

|            |           |                                                                                     |      |      |      |      |      |      |      |      |          |          |      |      |      |      |      |      |      |      |      |          |          |           |          |          |          |
|------------|-----------|-------------------------------------------------------------------------------------|------|------|------|------|------|------|------|------|----------|----------|------|------|------|------|------|------|------|------|------|----------|----------|-----------|----------|----------|----------|
| 258905_at  | A13g06390 | unknown protein similar to hypothetical integral membrane family protein            | 38   | 45   | 57   | 56   | 58   | 62   | 47   | 59   | 0.80     | 0.172009 | 41   | 40   | 49   | 38   | 39   | 38   | 49   | 41   | 1.06 | 0.524099 | 38       | 1.12      | 0.182148 |          |          |
| 258906_at  | A13g06380 | unknown protein similar to C-terminal I F-box family protein / tubby family protei  | 285  | 431  | 508  | 352  | 407  | 291  | 408  | 350  | 1.16     | 0.477400 | 330  | 458  | 354  | 499  | 358  | 370  | 496  | 506  | 381  | 446      | 0.85     | 0.266917  | 409      | 0.93     | 0.662026 |
| 258907_at  | A13g06370 | putative sodium cation exchanger simi sodium cation exchanger, putative (NH)        | 172  | 63   | 63   | 59   | 68   | 64   | 54   | 64   | 0.85     | 0.176665 | 38   | 35   | 42   | 36   | 35   | 37   | 42   | 43   | 38   | 39       | 0.99     | 0.878040  | 38       | 1.06     | 0.379700 |
| 258908_at  | A13g06360 | putative dehydrogenase shikimate dehydrogenase dehydrogenase, putative /            | 363  | 559  | 618  | 567  | 618  | 567  | 618  | 567  | 0.82     | 0.223403 | 444  | 309  | 433  | 425  | 502  | 441  | 502  | 441  | 502  | 441      | 0.79     | 0.425691  | 502      | 0.79     | 0.168511 |
| 258909_at  | A13g06340 | putative DNAi protein Pfam HMM hit: C DNAi heat shock N-terminal domain-co          | 172  | 173  | 192  | 251  | 239  | 194  | 180  | 228  | 0.79     | 0.058699 | 148  | 122  | 159  | 180  | 154  | 141  | 178  | 163  | 143  | 163      | 0.88     | 0.160622  | 158      | 0.91     | 0.401502 |
| 258910_at  | A13g06480 | putative RNA helicase similar to RNA DEAD box RNA helicase, putative                | 179  | 233  | 234  | 232  | 267  | 212  | 215  | 237  | 0.91     | 0.418000 | 150  | 163  | 151  | 202  | 152  | 147  | 171  | 161  | 155  | 167      | 0.93     | 0.397684  | 167      | 0.92     | 0.524703 |
| 258911_at  | A13g06470 | unknown protein similar to hypothetical unknown protein similar to hypothetical     | 85   | 112  | 102  | 119  | 100  | 92   | 107  | 0.86 | 0.272484 | 85       | 95   | 97   | 92   | 85   | 72   | 69   | 65   | 92   | 77   | 1.20     | 0.078106 | 83        | 1.11     | 0.257011 |          |
| 258912_at  | A13g06460 | unknown protein similar to hypothetical GNS150 RNA membrane family protein          | 55   | 67   | 73   | 62   | 73   | 59   | 65   | 65   | 1.03     | 0.866106 | 44   | 51   | 49   | 58   | 43   | 42   | 45   | 41   | 42   | 45       | 1.05     | 0.546013  | 46       | 1.05     | 0.168694 |
| 258913_at  | A13g06450 | unknown protein similar to putative ANI exon exchange family protein                | 593  | 734  | 697  | 974  | 1086 | 825  | 675  | 962  | 0.70     | 0.029484 | 561  | 480  | 507  | 1057 | 872  | 720  | 895  | 865  | 516  | 882      | 0.59     | 0.025052  | 883      | 0.58     | 0.021482 |
| 258914_at  | A13g06360 | hypothetical protein predicted by onefr arabinogalactan-protein (AGP27)             | 41   | 44   | 54   | 54   | 56   | 51   | 46   | 54   | 0.85     | 0.130558 | 53   | 60   | 67   | 70   | 60   | 63   | 60   | 50   | 60   | 61       | 0.98     | 0.8363070 | 64       | 0.93     | 0.404356 |
| 258880_at  | A13g06420 | hypothetical protein similar to symbiosis autophagy 8h (APG8h)                      | 473  | 703  | 778  | 81   | 86   | 59   | 66   | 75   | 0.87     | 0.462640 | 88   | 95   | 77   | 101  | 90   | 93   | 93   | 81   | 86   | 92       | 0.94     | 0.392918  | 95       | 0.91     | 0.239485 |
| 258881_Lat | A13g06310 | unknown protein : supported by full-ir NADH-ubiquinone oxidoreductase 19 NC         | 273  | 373  | 373  | 419  | 501  | 387  | 340  | 436  | 0.78     | 0.136441 | 301  | 339  | 339  | 517  | 377  | 364  | 382  | 366  | 326  | 401      | 0.81     | 0.111946  | 419      | 0.78     | 0.141633 |
| 258882_Lat | A13g06330 | unknown protein : supported by full-ir zinc finger (C3HC4-type RING finger) fa      | 178  | 280  | 236  | 430  | 355  | 231  | 406  | 0.57 | 0.010871 | 253      | 256  | 306  | 596  | 456  | 412  | 445  | 430  | 272  | 466  | 0.58     | 0.004007 | 485       | 0.58     | 0.017880 |          |
| 258882_at  | A13g06300 | unknown protein similar to C-terminal p oxidoreductase, 20G-Fe(II) oxygenase I      | 157  | 181  | 195  | 231  | 234  | 209  | 178  | 225  | 0.79     | 0.027167 | 201  | 204  | 210  | 301  | 245  | 243  | 237  | 221  | 205  | 249      | 0.82     | 0.051647  | 263      | 0.78     | 0.040221 |
| 258883_at  | A13g06440 | unknown protein similar to GB-AD552 galactosyltransferase family protein            | 124  | 171  | 162  | 171  | 185  | 134  | 153  | 164  | 0.93     | 0.026737 | 121  | 112  | 122  | 167  | 146  | 120  | 165  | 150  | 118  | 150      | 0.79     | 0.036426  | 144      | 0.82     | 0.139867 |
| 258884_at  | A13g02100 | putative UDP-glucosyl transferase sim UDP-glucuronosylUDP-glucosyl transfe          | 30   | 35   | 60   | 53   | 55   | 57   | 42   | 55   | 0.76     | 0.237786 | 26   | 23   | 29   | 29   | 26   | 35   | 23   | 26   | 27   | 0.98     | 0.872082 | 25        | 1.04     | 0.768778 |          |
| 258885_at  | A13g02070 | unknown protein : OTU-like cysteine protease family protein                         | 116  | 136  | 144  | 166  | 176  | 141  | 132  | 161  | 0.82     | 0.096269 | 168  | 163  | 183  | 225  | 181  | 165  | 187  | 175  | 178  | 167      | 0.95     | 0.555859  | 190      | 0.93     | 0.541602 |
| 258886_at  | A13g02040 | hypothetical protein predicted by onefr olivocrothoschorvi diester phosphodiester   | 122  | 140  | 168  | 177  | 161  | 116  | 150  | 151  | 0.99     | 0.958564 | 121  | 132  | 141  | 163  | 130  | 132  | 149  | 140  | 131  | 143      | 0.92     | 0.257927  | 141      | 0.93     | 0.449272 |
| 258887_at  | A13g02110 | putative serine carboxypeptidase II sim serine carboxypeptidase S10 family prot     | 294  | 369  | 577  | 690  | 740  | 596  | 623  | 675  | 0.92     | 0.574985 | 517  | 584  | 595  | 739  | 640  | 480  | 623  | 588  | 566  | 614      | 0.92     | 0.441196  | 620      | 0.91     | 0.532821 |
| 258888_at  | A13g02080 | putative 40S ribosomal protein S19 sim 40S ribosomal protein S19 (RPS19A)           | 2541 | 3602 | 3772 | 3420 | 3612 | 3197 | 3438 | 3410 | 1.01     | 0.942624 | 3275 | 3525 | 3500 | 4068 | 3514 | 3246 | 3739 | 3574 | 3433 | 3628     | 0.95     | 0.343955  | 3609     | 0.95     | 0.527909 |
| 258889_at  | A13g02120 | Expressed protein : supported by full-ir hydroxylproline-rich oligopeptide family p | 171  | 274  | 209  | 252  | 246  | 213  | 218  | 237  | 0.92     | 0.594379 | 232  | 235  | 243  | 327  | 254  | 242  | 265  | 262  | 236  | 270      | 0.87     | 0.137384  | 274      | 0.86     | 0.226565 |
| 258890_at  | A13g02050 | putative octansium transporter similar ir potassium transporter (KUP3)              | 193  | 251  | 241  | 330  | 361  | 295  | 229  | 328  | 0.70     | 0.018885 | 168  | 168  | 198  | 271  | 221  | 160  | 208  | 188  | 178  | 209      | 0.85     | 0.264231  | 217      | 0.82     | 0.308679 |
| 258891_at  | A13g02060 | putative helicase similar to C-terminal I: DEAD/DEAH box helicase, putative         | 95   | 137  | 139  | 138  | 169  | 120  | 124  | 142  | 0.87     | 0.401605 | 103  | 107  | 117  | 134  | 116  | 112  | 114  | 108  | 109  | 117      | 0.93     | 0.285792  | 121      | 0.90     | 0.210507 |
| 258892_at  | A13g02090 | putative mitochondrial processing pepti mitochondrial processing peptidase beta     | 1072 | 1023 | 1232 | 1498 | 1061 | 978  | 1263 | 0.77 | 0.121722 | 725      | 585  | 647  | 907  | 787  | 665  | 813  | 764  | 653  | 787  | 0.83     | 0.085193 | 786       | 0.83     | 0.172142 |          |
| 258893_at  | A13g03300 | unknown protein similar to RNA helicase DEAD/DEAH box helicase carpel factor        | 156  | 202  | 215  | 215  | 245  | 201  | 191  | 220  | 0.87     | 0.252725 | 173  | 144  | 179  | 217  | 184  | 147  | 171  | 180  | 165  | 180      | 0.92     | 0.423632  | 183      | 0.91     | 0.468311 |
| 258894_at  | A13g03210 | unknown protein : expressed protein                                                 | 819  | 1074 | 322  | 313  | 341  | 286  | 269  | 313  | 0.86     | 0.286724 | 160  | 139  | 171  | 201  | 169  | 155  | 189  | 156  | 178  | 0.88     | 0.143500 | 175       | 0.89     | 0.328150 |          |
| 258895_at  | A13g03200 | NAM-like protein (no apical meristem) no apical meristem (NAM) family protein       | 16   | 18   | 21   | 21   | 21   | 30   | 22   | 18   | 0.75     | 0.115281 | 13   | 19   | 19   | 20   | 21   | 20   | 21   | 22   | 17   | 21       | 0.84     | 0.074003  | 20       | 0.85     | 0.201446 |
| 258896_at  | A13g03180 | unknown protein : Gnt1-like family protein                                          | 143  | 196  | 212  | 223  | 260  | 189  | 183  | 224  | 0.82     | 0.235956 | 165  | 163  | 167  | 240  | 196  | 191  | 196  | 184  | 165  | 201      | 0.82     | 0.034470  | 209      | 0.79     | 0.048871 |
| 258897_at  | A13g03130 | hypothetical protein predicted by onefr expressed protein                           | 154  | 164  | 156  | 200  | 196  | 179  | 158  | 192  | 0.82     | 0.009497 | 121  | 113  | 133  | 172  | 146  | 114  | 141  | 127  | 122  | 140      | 0.87     | 0.241854  | 144      | 0.85     | 0.285058 |
| 258898_at  | A13g03110 | putative exportin1 (XPO1) protein simi exportin 1, putative                         | 201  | 293  | 249  | 302  | 237  | 201  | 248  | 273  | 0.88     | 0.010297 | 187  | 161  | 202  | 249  | 186  | 203  | 178  | 195  | 189  | 208      | 0.95     | 0.587907  | 201      | 0.94     | 0.611203 |
| 258899_at  | A13g03090 | hypothetical protein similar to xylose trisac transporter family protein            | 235  | 327  | 276  | 434  | 547  | 400  | 279  | 460  | 0.61     | 0.024670 | 170  | 158  | 189  | 330  | 249  | 200  | 231  | 225  | 172  | 247      | 0.70     | 0.049177  | 260      | 0.66     | 0.088367 |
| 258870_at  | A13g03080 | putative NADH-dependent oxidoreduct NADH-dependent oxidoreductase, putat            | 16   | 15   | 20   | 23   | 19   | 22   | 17   | 22   | 0.79     | 0.087655 | 13   | 13   | 25   | 12   | 13   | 12   | 11   | 11   | 17   | 12       | 1.46     | 0.105014  | 12       | 1.41     | 0.263452 |
| 258871_at  | A13g03060 | putative 26S proteasome regulatory su AAA-type ATPase family protein                | 206  | 223  | 253  | 303  | 304  | 272  | 227  | 293  | 0.78     | 0.019625 | 140  | 111  | 161  | 205  | 170  | 156  | 172  | 161  | 137  | 173      | 0.80     | 0.065058  | 177      | 0.78     | 0.127500 |
| 258872_at  | A13g03020 | hypothetical protein similar to L1 isocii homeobox-leucine zipper family protei     | 21   | 31   | 37   | 36   | 42   | 34   | 32   | 37   | 0.86     | 0.216226 | 21   | 30   | 27   | 25   | 28   | 28   | 33   | 26   | 28   | 33       | 0.85     | 0.450612  | 27       | 0.86     | 0.730336 |
| 258873_at  | A13g03240 | hypothetical protein similar to unknown esterase/ase/thioesterase family crole      | 39   | 45   | 67   | 71   | 55   | 54   | 50   | 60   | 0.83     | 0.371728 | 33   | 31   | 33   | 34   | 29   | 30   | 44   | 35   | 32   | 35       | 0.94     | 0.603165  | 31       | 1.05     | 0.455380 |
| 258874_at  | A13g03230 | hypothetical protein similar to unknown esterase/ase/thioesterase family crole      | 61   | 87   | 107  | 107  | 121  | 113  | 85   | 114  | 0.75     | 0.109960 | 46   | 54   | 71   | 66   | 54   | 65   | 54   | 48   | 57   | 57       | 0.99     | 0.963977  | 62       | 0.92     | 0.601676 |
| 258875_at  | A13g03160 | unknown protein : supported by full-ir expressed protein                            | 587  | 680  | 741  | 841  | 800  | 788  | 670  | 840  | 0.80     | 0.033566 | 840  | 910  | 855  | 1255 | 993  | 972  | 928  | 885  | 868  | 1007     | 0.86     | 0.186790  | 1073     | 0.81     | 0.093678 |
| 258876_at  | A13g03120 | putative ADP-ribosylation factor similar ADP-ribosylation factor, putative          | 200  | 268  | 319  | 305  | 306  | 273  | 262  | 398  | 0.89     | 0.410168 | 252  | 280  | 264  | 375  | 305  | 296  | 291  | 265  | 291  | 313      | 0.85     | 0.069003  | 325      | 0.84     | 0.225335 |
| 258877_at  | A13g03220 | putative expansion precursor similar to e expansion, putative (EXP13)               | 171  | 208  | 255  | 329  | 352  | 304  | 212  | 329  | 0.64     | 0.013820 | 182  | 237  | 229  | 378  | 265  | 257  | 252  | 216  | 277  | 0.78     | 0.143277 | 300       | 0.72     | 0.120292 |          |
| 258878_at  | A13g03170 | hypothetical protein predicted by onefr expressed protein                           | 74   | 103  | 182  | 120  | 134  | 95   | 120  | 116  | 1.03     | 0.915888 | 128  | 155  | 152  | 179  | 145  | 181  | 160  | 154  | 145  | 164      | 0.89     | 0.146202  | 168      | 0.86     | 0.181877 |
| 258879_at  | A13g03270 | unknown protein : supported by full-ir universal stress protein (USP) family cro    | 119  | 165  | 244  | 269  | 314  | 240  | 176  | 275  | 0.64     | 0.081420 | 321  | 400  | 306  | 490  | 393  | 333  | 400  | 367  | 342  | 397      | 0.86     | 0.231594  | 405      | 0.84     | 0.310444 |
| 258845_at  | A13g03150 | unknown protein : supported by full-ir expressed protein                            | 616  | 957  | 1052 | 518  | 719  | 488  | 875  | 575  | 1.52     | 0.117353 | 861  | 1132 | 816  | 928  | 772  | 836  | 851  | 928  | 836  | 885      | 1.06     | 0.573532  | 945      | 1.11     | 0.444955 |
| 258846_at  | A13g03070 | unknown protein : supported by full-ir NADH-ubiquinone oxidoreductase-relate        | 815  | 968  | 1027 | 1055 | 1199 | 1227 | 1101 | 1128 | 0.82     | 0.088705 | 1068 | 1138 | 1282 | 1098 | 1198 | 1282 | 1198 | 1282 | 1145 | 1305     | 0.88     | 0.219527  | 1305     | 0.84     | 0.173247 |
| 258847_at  | A13g03100 | unknown protein : supported by full-ir NADH-ubiquinone oxidoreductase fami          | 766  | 968  | 1027 | 1111 | 1124 | 1039 | 920  | 1091 | 0.84     | 0.109224 | 1068 | 1196 | 1193 | 1498 | 1192 | 1023 | 1156 | 1141 | 1132 | 1202     | 0.94     | 0.564785  | 1238     | 0.91     | 0.526559 |
| 258848_at  | A13g03305 | Expressed protein : supported by full-ir calcineurin-like phosphoesterase family    | 240  | 279  | 291  | 345  | 361  | 289  | 270  | 332  | 0.81     | 0.083870 | 225  | 209  | 258  | 300  | 261  | 209  | 257  | 250  | 230  | 257      | 0.90     | 0.300917  | 259      | 0.89     | 0.418231 |
| 258849_at  | A13g03250 | putative UDP-glucose 6-phosphatase UTP-glucose-1-phosphate uridylyltransf           | 389  | 389  | 489  | 713  | 726  | 627  | 423  | 689  | 0.61     | 0.004301 | 390  | 352  | 445  | 721  | 554  | 443  | 536  | 525  | 396  | 556      | 0.71     | 0.045967  | 573      | 0.69     | 0.106598 |
| 258890_at  | A13g03050 | putative cellulose synthase catalytic sub cellulose synthase family protein (CsiD3  | 240  | 293  | 343  | 415  | 492  | 340  | 318  | 41   |          |          |      |      |      |      |      |      |      |      |      |          |          |           |          |          |          |

|             |           |                                                                                           |      |      |      |      |      |      |      |      |          |          |      |      |      |      |      |      |      |      |      |      |          |          |      |          |          |
|-------------|-----------|-------------------------------------------------------------------------------------------|------|------|------|------|------|------|------|------|----------|----------|------|------|------|------|------|------|------|------|------|------|----------|----------|------|----------|----------|
| 258811_at   | A13g03990 | unknown protein similar to putative prolyl isomerase/lipase/thioesterase family prote     | 371  | 549  | 569  | 447  | 446  | 436  | 496  | 443  | 1.12     | 0.443732 | 610  | 780  | 632  | 980  | 772  | 729  | 877  | 820  | 674  | 836  | 0.81     | 0.060716 | 827  | 0.82     | 0.179698 |
| 258812_at   | A13g03950 | unknown protein similar to GB-ADP10 expressed protein                                     | 285  | 368  | 403  | 347  | 365  | 300  | 352  | 338  | 1.04     | 0.735538 | 248  | 238  | 290  | 332  | 274  | 264  | 263  | 253  | 259  | 277  | 0.93     | 0.437455 | 200  | 0.89     | 0.059911 |
| 258813_at   | A13g04060 | NAM-like protein (no isoal meristem) no apical meristem (NAM) family protein              | 24   | 30   | 36   | 20   | 19   | 17   | 30   | 19   | 1.61     | 0.031736 | 25   | 31   | 32   | 17   | 16   | 18   | 19   | 14   | 30   | 17   | 1.75     | 0.000788 | 17   | 1.74     | 0.006892 |
| 258814_at   | A13g04000 | putative short-chain vde dehydrodione C reductase                                         | 351  | 402  | 507  | 562  | 668  | 451  | 581  | 0.78 | 0.105671 | 326      | 376  | 376  | 432  | 431  | 388  | 458  | 431  | 423  | 388  | 458  | 0.81     | 0.068972 | 454  | 0.81     | 0.006892 |
| 258815_at   | A13g04000 | putative short-chain vde dehydrodione C reductase                                         | 24   | 42   | 38   | 44   | 38   | 36   | 35   | 39   | 0.88     | 0.485654 | 36   | 45   | 32   | 57   | 44   | 64   | 54   | 54   | 38   | 52   | 0.72     | 0.240704 | 48   | 0.78     | 0.155485 |
| 258816_at   | A13g03960 | putative T-complex protein 1, theta subunit, chaperonin, putative                         | 953  | 1067 | 1010 | 1176 | 1332 | 1035 | 1010 | 1181 | 0.86     | 0.135737 | 861  | 719  | 953  | 1041 | 1039 | 819  | 1046 | 962  | 844  | 981  | 0.86     | 0.122952 | 966  | 0.87     | 0.291474 |
| 258757_at   | A13g10910 | putative RING zinc finger protein conta zinc finger (C3HC4-type RING finger) fa           | 23   | 32   | 35   | 28   | 31   | 28   | 30   | 29   | 1.04     | 0.794824 | 25   | 29   | 29   | 48   | 34   | 35   | 49   | 45   | 27   | 42   | 0.65     | 0.015398 | 39   | 0.70     | 0.068702 |
| 258758_at   | A13g10910 | putative RING zinc finger protein conta zinc finger (C3HC4-type RING finger) fa           | 201  | 246  | 247  | 268  | 247  | 243  | 247  | 243  | 0.68     | 0.105671 | 278  | 278  | 231  | 312  | 243  | 289  | 230  | 219  | 243  | 289  | 0.80     | 0.215943 | 286  | 0.80     | 0.177116 |
| 258759_at   | A13g10800 | putative bZIP transcription factor conta bZIP transcription factor family protein         | 379  | 505  | 519  | 619  | 739  | 490  | 468  | 616  | 0.76     | 0.154608 | 415  | 389  | 377  | 520  | 424  | 383  | 514  | 487  | 394  | 466  | 0.85     | 0.098056 | 442  | 0.89     | 0.314402 |
| 258760_at   | A13g10780 | putative membrane protein similar to r emp24p25Lp24 family protein                        | 357  | 443  | 505  | 74   | 128  | 79   | 435  | 94   | 4.64     | 0.000770 | 374  | 433  | 395  | 74   | 60   | 69   | 87   | 82   | 400  | 75   | 5.37     | 0.000000 | 68   | 5.91     | 0.000048 |
| 258761_at   | A13g10760 | unknown protein                                                                           | 154  | 201  | 202  | 226  | 211  | 208  | 185  | 215  | 0.86     | 0.151560 | 193  | 230  | 239  | 315  | 231  | 212  | 290  | 263  | 221  | 262  | 0.84     | 0.176616 | 253  | 0.87     | 0.409816 |
| 258762_at   | A13g10750 | hypothetical protein                                                                      | 77   | 91   | 105  | 82   | 93   | 88   | 192  | 88   | 1.05     | 0.694743 | 76   | 72   | 82   | 75   | 72   | 79   | 120  | 82   | 82   | 88   | 0.93     | 0.654871 | 75   | 1.08     | 0.459151 |
| 258763_s_at | A13g03540 | putative beta-mannan endohydrolase 1 (4-4)-beta-mannan endohydrolase, puta                | 92   | 146  | 138  | 6    | 10   | 7    | 125  | 8    | 15.91    | 0.005294 | 135  | 160  | 150  | 8    | 14   | 6    | 7    | 146  | 9    | 17   | 17.41    | 0.000000 | 10   | 15.07    | 0.000000 |
| 258764_at   | A13g10720 | putative pectinesterase contains simial pectinesterase, putative                          | 411  | 443  | 392  | 236  | 224  | 155  | 415  | 205  | 2.02     | 0.001974 | 123  | 104  | 108  | 90   | 80   | 55   | 84   | 77   | 112  | 77   | 1.45     | 0.008263 | 75   | 1.49     | 0.036703 |
| 258765_at   | A13g10710 | putative pectinesterase contains simial pectinesterase family protein                     | 10   | 9    | 15   | 11   | 14   | 14   | 11   | 13   | 0.89     | 0.507121 | 12   | 16   | 11   | 11   | 12   | 11   | 14   | 10   | 13   | 12   | 1.13     | 0.342181 | 11   | 1.18     | 0.264461 |
| 258766_at   | A13g10700 | galactokinase-like protein similar to aa GHMP kinase family protein                       | 97   | 125  | 127  | 108  | 137  | 99   | 116  | 115  | 1.01     | 0.917158 | 105  | 103  | 109  | 134  | 119  | 110  | 130  | 125  | 106  | 124  | 0.85     | 0.021442 | 121  | 0.87     | 0.101883 |
| 258767_at   | A13g10690 | putative (1-4)-beta-mannan endohydrol (1-4)-beta-mannan endohydrolase, puta               | 61   | 110  | 129  | 16   | 16   | 16   | 100  | 16   | 6.32     | 0.013753 | 654  | 804  | 635  | 16   | 16   | 28   | 21   | 19   | 698  | 20   | 35.06    | 0.000002 | 20   | 35.06    | 0.000025 |
| 258768_at   | A13g10880 | hypothetical protein predicted by gene expressed protein                                  | 48   | 70   | 74   | 85   | 81   | 69   | 64   | 79   | 0.81     | 0.193400 | 44   | 53   | 62   | 91   | 62   | 62   | 51   | 47   | 53   | 63   | 0.84     | 0.391253 | 72   | 0.73     | 0.149010 |
| 258769_at   | A13g10870 | putative alpha-hydroxyvitriolase lysine simil hydroxylase, alpha/beta fold family protein | 108  | 128  | 120  | 101  | 115  | 93   | 118  | 103  | 1.15     | 0.149920 | 134  | 144  | 145  | 111  | 81   | 82   | 95   | 81   | 141  | 90   | 1.57     | 0.000738 | 91   | 1.55     | 0.008226 |
| 258770_at   | A13g10830 | hypothetical protein                                                                      | 14   | 18   | 23   | 18   | 23   | 23   | 19   | 21   | 0.88     | 0.475498 | 19   | 15   | 30   | 18   | 19   | 22   | 23   | 21   | 21   | 21   | 1.03     | 0.860662 | 20   | 1.07     | 0.770296 |
| 258771_at   | A13g10770 | unknown protein - supported by full-len expressed protein                                 | 729  | 982  | 1005 | 873  | 980  | 749  | 905  | 867  | 1.04     | 0.747660 | 914  | 1053 | 901  | 1276 | 1034 | 999  | 1097 | 1056 | 956  | 1092 | 0.87     | 0.113943 | 1103 | 0.87     | 0.214238 |
| 258772_at   | A13g10860 | putative ubiquinol-cytochrome C reduct ubiquinol-cytochrome C reductase comc              | 1021 | 1278 | 1287 | 1441 | 1506 | 1366 | 1195 | 1437 | 0.83     | 0.065160 | 1381 | 1544 | 1545 | 1919 | 1600 | 1420 | 1505 | 1484 | 1490 | 1585 | 0.94     | 0.471791 | 1646 | 0.91     | 0.373310 |
| 258773_at   | A13g10740 | hypothetical protein predicted by geneac ad1-unc-84-like 2 family protein                 | 216  | 255  | 248  | 272  | 306  | 245  | 240  | 273  | 0.88     | 0.214542 | 243  | 244  | 258  | 330  | 281  | 249  | 314  | 279  | 249  | 291  | 0.85     | 0.071580 | 287  | 0.87     | 0.188801 |
| 258774_at   | A13g10740 | putative alpha-L-arabinofuranosidase c glycosyl hydrolase family protein 51               | 212  | 343  | 434  | 283  | 358  | 327  | 330  | 293  | 1.13     | 0.641102 | 290  | 319  | 281  | 407  | 366  | 368  | 425  | 409  | 297  | 393  | 0.87     | 0.062576 | 377  | 0.79     | 0.013333 |
| 258775_at   | A13g10850 | hydroxyacylglutathione hydrolase cyto hydroxyacylglutathione hydrolase, cytop             | 744  | 1151 | 1135 | 1277 | 1465 | 1153 | 1053 | 1298 | 0.81     | 0.127681 | 1177 | 1324 | 1377 | 1658 | 1478 | 1326 | 1243 | 1275 | 1292 | 1396 | 0.93     | 0.389663 | 1486 | 0.97     | 0.159733 |
| 258776_at   | A13g11830 | putative T-complex protein 1, ETA sub chaperonin, putative                                | 1230 | 1649 | 1482 | 1710 | 1873 | 1383 | 1454 | 1655 | 0.88     | 0.345173 | 1266 | 1079 | 1178 | 1530 | 1372 | 1183 | 1556 | 1514 | 1174 | 1431 | 0.82     | 0.040415 | 1362 | 0.86     | 0.017539 |
| 258777_at   | A13g11850 | hypothetical protein predicted by gene expressed protein                                  | 63   | 78   | 103  | 87   | 82   | 76   | 81   | 82   | 0.99     | 0.965541 | 49   | 49   | 55   | 53   | 46   | 38   | 59   | 48   | 51   | 49   | 1.04     | 0.711345 | 46   | 1.11     | 0.345156 |
| 258778_s_at | A13g11860 | hypothetical protein predicted by gene expressed protein // expressed protein             | 50   | 73   | 74   | 82   | 96   | 65   | 66   | 81   | 0.81     | 0.266163 | 56   | 69   | 58   | 97   | 58   | 69   | 73   | 68   | 61   | 73   | 0.83     | 0.223891 | 75   | 0.81     | 0.317295 |
| 258779_at   | A13g11870 | putative orlekin kinase contains Pfam c protein kinase-related                            | 44   | 44   | 57   | 62   | 69   | 47   | 65   | 57   | 1.13     | 0.591114 | 54   | 64   | 61   | 68   | 66   | 57   | 67   | 69   | 71   | 65   | 1.09     | 0.403011 | 60   | 1.18     | 0.138653 |
| 258780_at   | A13g11910 | putative ubiquitin carboxyl-terminal hyd ubiquitin-specific protease, putative            | 698  | 935  | 942  | 801  | 1068 | 801  | 944  | 0.92 | 0.485524 | 616      | 408  | 377  | 712  | 641  | 684  | 533  | 698  | 651  | 540  | 651  | 0.84     | 0.171677 | 611  | 0.87     | 0.400273 |
| 258781_at   | A13g11740 | hypothetical protein predicted by gene expressed protein                                  | 38   | 45   | 57   | 63   | 52   | 48   | 57   | 0.83 | 0.257218 | 39       | 40   | 52   | 52   | 39   | 41   | 46   | 51   | 44   | 46   | 44   | 0.99     | 0.650007 | 44   | 0.99     | 0.949386 |
| 258782_at   | A13g11750 | putative dihydronoepterin aldolase simi dihydronoepterin aldolase, putative               | 20   | 23   | 28   | 21   | 12   | 24   | 17   | 1.45 | 0.097389 | 21       | 26   | 21   | 15   | 15   | 12   | 16   | 9    | 23   | 14   | 1.70 | 0.003720 | 14       | 1.62 | 0.009408 |          |
| 258783_at   | A13g11760 | unknown protein                                                                           | 237  | 307  | 282  | 296  | 327  | 227  | 275  | 280  | 0.98     | 0.908794 | 193  | 174  | 204  | 253  | 243  | 187  | 281  | 270  | 190  | 247  | 0.77     | 0.046990 | 228  | 0.84     | 0.186264 |
| 258784_at   | A13g11770 | unknown protein                                                                           | 211  | 301  | 313  | 283  | 325  | 239  | 275  | 276  | 1.00     | 0.983216 | 293  | 316  | 304  | 448  | 340  | 321  | 349  | 321  | 305  | 355  | 0.86     | 0.162952 | 369  | 0.82     | 0.181615 |
| 258785_at   | A13g11790 | unknown protein                                                                           | 11   | 12   | 16   | 18   | 15   | 16   | 13   | 17   | 0.80     | 0.136555 | 10   | 18   | 14   | 14   | 12   | 14   | 12   | 13   | 14   | 13   | 1.09     | 0.533994 | 13   | 1.05     | 0.779982 |
| 258786_at   | A13g11820 | putative syntaxin contains Pfam profile: syntaxin 121 (SYPT121) / syntaxin-relate         | 374  | 322  | 444  | 527  | 648  | 459  | 380  | 545  | 0.70     | 0.065908 | 377  | 422  | 343  | 543  | 447  | 396  | 533  | 505  | 381  | 485  | 0.79     | 0.042945 | 462  | 0.82     | 0.171639 |
| 258787_at   | A13g11840 | hypothetical protein predicted by geneac U-box domain-containing protein                  | 21   | 23   | 26   | 25   | 24   | 24   | 23   | 24   | 0.95     | 0.533075 | 27   | 24   | 23   | 22   | 24   | 22   | 30   | 24   | 25   | 25   | 1.00     | 0.973113 | 23   | 1.07     | 0.331104 |
| 258788_at   | A13g11820 | unknown protein - supported by full-len L-2-related lipid recognition domain-ct           | 165  | 160  | 169  | 203  | 165  | 151  | 169  | 0.59 | 0.460492 | 187      | 135  | 186  | 236  | 209  | 185  | 194  | 186  | 188  | 202  | 194  | 0.84     | 0.525126 | 210  | 0.87     | 0.215506 |
| 258754_at   | A13g11920 | hypothetical protein similar to hyprothet glutadonin-related                              | 14   | 18   | 19   | 22   | 19   | 24   | 17   | 22   | 0.78     | 0.072825 | 15   | 17   | 18   | 16   | 16   | 14   | 17   | 16   | 17   | 16   | 1.05     | 0.384635 | 16   | 1.07     | 0.343706 |
| 258755_at   | A13g11950 | hypothetical protein identical to hvooth UbA1 prenylttransferase family protein           | 136  | 192  | 171  | 231  | 222  | 186  | 167  | 213  | 0.78     | 0.094044 | 164  | 181  | 187  | 260  | 192  | 172  | 198  | 195  | 177  | 203  | 0.87     | 0.244319 | 208  | 0.85     | 0.325182 |
| 258756_at   | A13g11960 | hypothetical protein similar to hvootheti cleavage and colvaldenation specificitv         | 156  | 243  | 251  | 270  | 266  | 215  | 217  | 250  | 0.87     | 0.394206 | 185  | 192  | 214  | 273  | 205  | 185  | 231  | 228  | 197  | 224  | 0.88     | 0.238433 | 221  | 0.89     | 0.445739 |
| 258725_at   | A13g11745 | expressed protein ; supported by full-l expressed protein                                 | 153  | 194  | 205  | 163  | 212  | 159  | 178  | 185  | 0.96     | 0.801427 | 178  | 187  | 187  | 313  | 235  | 245  | 240  | 194  | 184  | 245  | 0.75     | 0.054847 | 254  | 0.70     | 0.032221 |
| 258727_at   | A13g11930 | atthylene-responsive protein, putative s universal stress protein (USP) family prc        | 26   | 31   | 30   | 27   | 28   | 26   | 107  | 81   | 0.49     | 0.412761 | 82   | 44   | 76   | 60   | 51   | 63   | 60   | 59   | 61   | 60   | 0.59     | 0.006116 | 58   | 0.65     | 0.015448 |
| 258728_at   | A13g11800 | unknown protein ; supported by cDNA: expressed protein                                    | 437  | 511  | 510  | 573  | 676  | 521  | 486  | 590  | 0.82     | 0.114953 | 582  | 655  | 588  | 854  | 735  | 668  | 622  | 606  | 608  | 697  | 0.87     | 0.206924 | 752  | 0.81     | 0.072096 |
| 258729_at   | A13g11900 | putative amino acid transporter protein - amino acid transporter family protein           | 122  | 162  | 201  | 211  | 182  | 177  | 162  | 190  | 0.85     | 0.329925 | 114  | 123  | 140  | 204  | 135  | 131  | 155  | 142  | 126  | 154  | 0.82     | 0.183619 | 157  | 0.80     | 0.272844 |
| 258730_at   | A13g11730 | putative GTP-binding protein (ATPFB1) Ras-related GTP-binding protein. outath             | 476  | 586  | 634  | 755  | 787  | 654  | 565  | 732  | 0.77     | 0.053921 | 496  | 566  | 624  | 833  | 671  | 594  | 631  | 615  | 562  | 669  | 0.84     | 0.143751 | 699  | 0.80     | 0.160421 |
| 258731_at   | A13g11680 | unknown protein - supported by cDNA: expressed protein                                    | 211  | 301  | 313  | 283  | 325  | 239  | 275  | 276  | 1.00     | 0.983216 | 293  | 316  | 304  | 448  | 340  | 321  | 349  | 321  | 305  | 355  | 0.86     | 0.162952 | 369  | 0.82     | 0.181615 |
| 258732_at   | A         |                                                                                           |      |      |      |      |      |      |      |      |          |          |      |      |      |      |      |      |      |      |      |      |          |          |      |          |          |

|           |           |                                                                                         |      |      |      |      |       |      |      |      |          |          |      |      |      |      |      |      |      |      |          |      |          |          |      |          |          |
|-----------|-----------|-----------------------------------------------------------------------------------------|------|------|------|------|-------|------|------|------|----------|----------|------|------|------|------|------|------|------|------|----------|------|----------|----------|------|----------|----------|
| 258717_at | A13g09740 | unknown protein ; supported by cDNA: syntxin 71 (SYPT7)                                 | 992  | 1161 | 1250 | 1334 | 1360  | 1199 | 1134 | 1298 | 0.87     | 0.145307 | 1042 | 1175 | 1087 | 1562 | 1292 | 1042 | 1390 | 1246 | 1101     | 1307 | 0.84     | 0.130823 | 1299 | 0.85     | 0.271483 |
| 258718_at | A13g09760 | unknown protein ; supported by cDNA: zinc finger (C3HC4-type RING finger) fa            | 79   | 91   | 114  | 127  | 143   | 99   | 95   | 123  | 0.77     | 0.156999 | 59   | 72   | 86   | 111  | 76   | 86   | 92   | 94   | 72       | 92   | 0.79     | 0.088256 | 91   | 0.80     | 0.225177 |
| 258691_at | A13g08630 | unknown protein                                                                         | 148  | 154  | 180  | 167  | 182   | 153  | 161  | 167  | 0.96     | 0.834336 | 134  | 153  | 157  | 217  | 141  | 147  | 164  | 148  | 148      | 163  | 0.90     | 0.445557 | 168  | 0.88     | 0.459388 |
| 258692_at | A13g08640 | unknown protein                                                                         | 444  | 464  | 544  | 663  | 521   | 409  | 573  | 0.71 | 0.152484 | 410      | 448  | 441  | 630  | 549  | 627  | 650  | 442  | 460  | 497      | 540  | 0.82     | 0.060202 | 560  | 0.81     | 0.041154 |
| 258693_at | A13g08650 | unknown protein                                                                         | 503  | 512  | 782  | 864  | 972   | 712  | 699  | 849  | 0.82     | 0.291170 | 547  | 471  | 622  | 784  | 651  | 560  | 866  | 827  | 546      | 737  | 0.74     | 0.060407 | 665  | 0.82     | 0.204847 |
| 258694_at | A13g08660 | putative non-phototropic hypocotyl simi phototropic-responsive protein, putative        | 12   | 12   | 14   | 18   | 22    | 16   | 13   | 19   | 0.69     | 0.035304 | 14   | 23   | 15   | 13   | 14   | 14   | 18   | 18   | 17       | 16   | 1.12     | 0.498399 | 14   | 1.25     | 0.291519 |
| 258695_at | A13g08670 | hypothetical protein                                                                    | 29   | 29   | 39   | 36   | 39    | 40   | 32   | 38   | 0.84     | 0.148384 | 15   | 18   | 21   | 17   | 18   | 17   | 19   | 16   | 18       | 17   | 1.03     | 0.705530 | 17   | 1.04     | 0.746043 |
| 258696_at | A13g08700 | 12, ubiquitin-conjugating enzyme, putative ubiquitin-conjugating enzyme, putative       | 11   | 11   | 12   | 12   | 12    | 10   | 13   | 12   | 1.10     | 0.458683 | 15   | 16   | 12   | 14   | 13   | 14   | 11   | 17   | 14       | 11   | 1.10     | 0.391603 | 14   | 1.05     | 0.194784 |
| 258695_at | A13g08710 | thioredoxin-like protein similar to thiore thiodoxin family protein                     | 489  | 602  | 662  | 711  | 858   | 561  | 584  | 710  | 0.82     | 0.274965 | 609  | 597  | 595  | 832  | 696  | 713  | 703  | 601  | 600      | 700  | 0.85     | 0.086229 | 747  | 0.80     | 0.026600 |
| 258696_at | A13g08550 | hypothetical protein                                                                    | 439  | 560  | 638  | 613  | 641   | 539  | 512  | 598  | 0.86     | 0.148196 | 450  | 411  | 507  | 606  | 529  | 435  | 465  | 458  | 456      | 499  | 0.91     | 0.389102 | 523  | 0.87     | 0.299477 |
| 258697_at | A13g08750 | hypothetical protein                                                                    | 23   | 24   | 30   | 28   | 33    | 26   | 31   | 0.83 | 0.105193 | 19       | 18   | 27   | 21   | 15   | 20   | 24   | 21   | 21   | 21       | 20   | 1.06     | 0.688426 | 19   | 1.14     | 0.441307 |
| 258698_at | A13g08780 | hypothetical protein predicted by gene expressed protein                                | 136  | 196  | 192  | 210  | 216   | 175  | 204  | 0.86 | 0.226864 | 146      | 175  | 179  | 249  | 170  | 162  | 184  | 167  | 167  | 190      | 0.88 | 0.316687 | 194      | 0.86 | 0.411102 |          |
| 258699_at | A13g08800 | hypothetical protein predicted by gene expressed protein                                | 50   | 73   | 74   | 81   | 69    | 66   | 74   | 0.88 | 0.337373 | 52       | 44   | 53   | 64   | 56   | 55   | 65   | 60   | 50   | 60       | 80   | 0.83     | 0.021144 | 59   | 0.85     | 0.094762 |
| 258670_at | A13g08810 | unknown protein                                                                         | 68   | 72   | 119  | 99   | 96    | 96   | 86   | 97   | 0.89     | 0.542636 | 60   | 47   | 85   | 70   | 55   | 58   | 64   | 59   | 64       | 61   | 1.04     | 0.776187 | 61   | 1.04     | 0.830997 |
| 258671_at | A13g08560 | putative vacuolar ATP synthase subunit vacuolar ATP synthase subunit E, puta            | 25   | 31   | 33   | 32   | 34    | 31   | 30   | 33   | 0.92     | 0.337681 | 35   | 29   | 39   | 48   | 34   | 30   | 32   | 35   | 34       | 36   | 0.96     | 0.775799 | 37   | 0.92     | 0.636070 |
| 258672_at | A13g08570 | hypothetical protein                                                                    | 56   | 78   | 89   | 110  | 114   | 112  | 74   | 112  | 0.66     | 0.017990 | 60   | 55   | 69   | 96   | 79   | 64   | 82   | 76   | 61       | 79   | 0.77     | 0.049627 | 80   | 0.76     | 0.138144 |
| 258673_at | A13g08730 | putative ribosomal-protein S6 kinase ( $\gamma$ serine/threonine protein kinase         | 326  | 348  | 418  | 420  | 457   | 391  | 364  | 423  | 0.86     | 0.157387 | 233  | 223  | 240  | 420  | 295  | 248  | 338  | 334  | 232      | 327  | 0.71     | 0.045896 | 321  | 0.72     | 0.158072 |
| 258674_at | A13g08620 | unknown protein                                                                         | 109  | 152  | 152  | 157  | 172   | 146  | 138  | 158  | 0.87     | 0.269188 | 133  | 135  | 165  | 210  | 159  | 158  | 156  | 147  | 144      | 166  | 0.87     | 0.240159 | 176  | 0.82     | 0.190186 |
| 258675_at | A13g08740 | outative elongation factor P (EF-P) simi elongation factor P (EF-P) family protein      | 436  | 791  | 666  | 657  | 824   | 522  | 631  | 668  | 0.95     | 0.802266 | 654  | 648  | 593  | 866  | 724  | 735  | 694  | 675  | 631      | 739  | 0.85     | 0.061764 | 775  | 0.81     | 0.043743 |
| 258676_at | A13g08770 | putative nonspecific lipid-transfer protein lipid transfer protein 6 (LTP6)             | 8230 | 8910 | 9297 | 9404 | 10009 | 9457 | 8812 | 9623 | 0.92     | 0.091655 | 7067 | 7187 | 7585 | 8746 | 7538 | 6630 | 8549 | 8536 | 7280     | 8000 | 0.91     | 0.237038 | 7638 | 0.95     | 0.601260 |
| 258677_at | A13g08600 | hypothetical protein predicted by gene expressed protein                                | 126  | 138  | 142  | 151  | 176   | 135  | 135  | 154  | 0.88     | 0.220856 | 126  | 141  | 138  | 172  | 123  | 129  | 157  | 143  | 135      | 145  | 0.93     | 0.455652 | 141  | 0.95     | 0.703759 |
| 258678_at | A13g08700 | putative ribosomal-protein S6 kinase ( $\gamma$ serine/threonine protein kinase (PK1)   | 326  | 348  | 418  | 420  | 457   | 391  | 364  | 423  | 0.86     | 0.157387 | 233  | 223  | 240  | 420  | 295  | 248  | 338  | 334  | 232      | 327  | 0.71     | 0.045896 | 321  | 0.72     | 0.158072 |
| 258679_at | A13g08690 | E2, ubiquitin-conjugating enzyme 11 (UBC1)                                              | 440  | 514  | 606  | 701  | 787   | 634  | 520  | 707  | 0.74     | 0.045577 | 460  | 553  | 587  | 800  | 656  | 590  | 654  | 703  | 537      | 699  | 0.77     | 0.070848 | 712  | 0.75     | 0.151711 |
| 258680_at | A13g08590 | putative 2.3-bisphosphoolvate-independent 2.3-bisphosphoolvate-independent sh           | 716  | 871  | 882  | 1194 | 1257  | 1014 | 823  | 1155 | 0.71     | 0.021514 | 941  | 696  | 943  | 1399 | 1126 | 893  | 1103 | 989  | 860      | 1090 | 0.79     | 0.095496 | 1120 | 0.77     | 0.164173 |
| 258681_at | A13g08580 | adenylate transferase identical to aden ADP-ATP carrier protein 1, mitochondri          | 3881 | 4234 | 4462 | 4752 | 4877  | 4226 | 4192 | 4618 | 0.91     | 0.178755 | 3919 | 3423 | 3758 | 4592 | 3966 | 3668 | 4326 | 4303 | 3700     | 4171 | 0.89     | 0.096109 | 4075 | 0.91     | 0.291353 |
| 258682_at | A13g08610 | unknown protein ; supported by full-length expressed protein                            | 1515 | 2077 | 2046 | 2267 | 2461  | 2168 | 1913 | 2305 | 0.83     | 0.081589 | 1946 | 2081 | 2274 | 2673 | 2074 | 1986 | 2106 | 2101 | 2000     | 2170 | 0.92     | 0.391478 | 2215 | 0.90     | 0.434861 |
| 258683_at | A13g08720 | putative ribosomal-protein S6 kinase ( $\gamma$ serine/threonine protein kinase (PK19)  | 326  | 348  | 418  | 420  | 457   | 391  | 364  | 423  | 0.86     | 0.157387 | 233  | 223  | 240  | 420  | 295  | 248  | 338  | 334  | 232      | 327  | 0.71     | 0.045896 | 321  | 0.72     | 0.158072 |
| 258684_at | A13g08760 | putative protein kinase contains Pfam : protein kinase family protein                   | 327  | 398  | 408  | 409  | 475   | 330  | 378  | 404  | 0.93     | 0.613247 | 334  | 292  | 309  | 385  | 339  | 302  | 404  | 410  | 312      | 368  | 0.85     | 0.101774 | 342  | 0.91     | 0.329070 |
| 258685_at | A13g08680 | outative protein kinase contains Pfam : leucine-rich repeat transmembrane cro           | 878  | 916  | 941  | 1145 | 1293  | 1001 | 912  | 1147 | 0.80     | 0.052861 | 856  | 766  | 881  | 1132 | 999  | 828  | 1156 | 1064 | 1064     | 1036 | 0.81     | 0.047843 | 986  | 0.85     | 0.182913 |
| 258686_at | A13g07830 | outative polyolacturonase similar to $\alpha$ -polyolacturonase, outative / pectinase   | 38   | 40   | 63   | 62   | 55    | 57   | 47   | 58   | 0.81     | 0.235022 | 32   | 28   | 41   | 40   | 31   | 30   | 40   | 35   | 34       | 35   | 0.96     | 0.764194 | 34   | 1.01     | 0.959224 |
| 258687_at | A13g07840 | outative polyolacturonase similar to $\alpha$ -polyolacturonase, outative / pectinase   | 38   | 40   | 63   | 62   | 55    | 57   | 47   | 58   | 0.81     | 0.235022 | 32   | 28   | 41   | 40   | 31   | 30   | 40   | 35   | 34       | 35   | 0.96     | 0.764194 | 34   | 1.01     | 0.959224 |
| 258688_at | A13g07860 | unknown protein                                                                         | 198  | 307  | 256  | 308  | 351   | 247  | 254  | 302  | 0.84     | 0.339122 | 250  | 265  | 303  | 422  | 334  | 350  | 323  | 311  | 273      | 348  | 0.78     | 0.038412 | 369  | 0.74     | 0.036692 |
| 258689_at | A13g07920 | putative eukaryotic translation initiation eukaryotic translation initiation factor 2 s | 54   | 74   | 101  | 91   | 96    | 82   | 76   | 90   | 0.85     | 0.386599 | 50   | 59   | 50   | 60   | 49   | 49   | 65   | 60   | 53       | 56   | 0.94     | 0.487407 | 53   | 1.00     | 0.966177 |
| 258690_at | A13g07940 | putative GTPase activating protein conz zinc finger and C2 domain protein, putat        | 132  | 168  | 170  | 167  | 177   | 160  | 157  | 168  | 0.93     | 0.435567 | 158  | 135  | 141  | 192  | 157  | 149  | 178  | 166  | 144      | 168  | 0.86     | 0.079854 | 166  | 0.87     | 0.224550 |
| 258691_at | A13g07960 | outative oxoaldehyde-oxidase 4-oxoaldehyde-oxidase 4-oxoaldehyde 5-kina                 | 69   | 69   | 81   | 89   | 96    | 82   | 73   | 89   | 0.82     | 0.047218 | 59   | 65   | 67   | 61   | 61   | 66   | 69   | 64   | 67       | 66   | 0.97     | 0.387778 | 66   | 0.97     | 0.506623 |
| 258692_at | A13g07970 | outative polyolacturonase similar to $\alpha$ -polyolacturonase, outative / pectinase   | 37   | 44   | 44   | 39   | 43    | 39   | 42   | 41   | 1.03     | 0.704435 | 42   | 35   | 47   | 32   | 30   | 28   | 34   | 30   | 41       | 31   | 1.34     | 0.012640 | 30   | 1.39     | 0.036873 |
| 258693_at | A13g07980 | outative MAP3K eosin protein kinase protein kinase, outative /// MAP3K eosin            | 236  | 243  | 243  | 297  | 300   | 241  | 241  | 279  | 0.86     | 0.116620 | 204  | 169  | 223  | 262  | 204  | 168  | 250  | 243  | 199      | 226  | 0.88     | 0.379996 | 211  | 0.94     | 0.705975 |
| 258694_at | A13g07990 | putative serine carboxypeptidase II sim serine carboxypeptidase S10 family prot         | 39   | 54   | 49   | 49   | 64    | 38   | 47   | 51   | 0.94     | 0.749200 | 52   | 41   | 59   | 52   | 49   | 48   | 50   | 48   | 51       | 49   | 1.03     | 0.752393 | 50   | 1.02     | 0.874571 |
| 258695_at | A13g08000 | putative RNA-binding protein contains RNA-binding protein, putative                     | 213  | 246  | 309  | 266  | 382   | 271  | 310  | 0.88 | 0.060668 | 166      | 146  | 136  | 166  | 141  | 156  | 168  | 152  | 149  | 161      | 156  | 0.95     | 0.467360 | 161  | 0.97     | 0.077467 |
| 258696_at | A13g08020 | unknown protein                                                                         | 157  | 221  | 226  | 246  | 235   | 170  | 201  | 217  | 0.93     | 0.653347 | 144  | 127  | 160  | 178  | 159  | 131  | 172  | 157  | 144      | 159  | 0.90     | 0.272596 | 156  | 0.92     | 0.506687 |
| 258697_at | A13g07990 | outative GTPase activating protein conz RabGAP/TBC domain-containing prot               | 218  | 325  | 361  | 335  | 365   | 304  | 301  | 335  | 0.90     | 0.507991 | 189  | 191  | 208  | 265  | 209  | 194  | 235  | 216  | 196      | 222  | 0.88     | 0.145654 | 222  | 0.88     | 0.297069 |
| 258698_at | A13g07880 | outative RHO GTP-dissociation inhibitor: RHO GTP-dissociation inhibitor fami            | 725  | 838  | 871  | 1018 | 1175  | 894  | 811  | 1029 | 0.79     | 0.077706 | 699  | 900  | 813  | 1269 | 973  | 937  | 901  | 895  | 804      | 995  | 0.81     | 0.111441 | 1060 | 0.76     | 0.101011 |
| 258699_at | A13g07850 | unknown protein ; supported by full-length ribonoid protein expressed protein           | 459  | 564  | 557  | 595  | 672   | 522  | 527  | 586  | 0.80     | 0.349128 | 324  | 344  | 350  | 439  | 376  | 372  | 373  | 349  | 339      | 382  | 0.89     | 0.089207 | 396  | 0.86     | 0.076015 |
| 258700_at | A13g07820 | outative polyolacturonase (PGA3) identical to polygalacturonase 3 (PGA3) / pectinase    | 100  | 144  | 162  | 173  | 118   | 107  | 111  | 74   | 2.32     | 0.094146 | 58   | 66   | 56   | 36   | 24   | 51   | 30   | 2.00 | 0.019249 | 38   | 1.57     | 0.074886 |      |          |          |
| 258701_at | A13g07930 | hypothetical protein predicted by gene: HHF-GFP base excision DNA repair fan            | 100  | 144  | 162  | 173  | 118   | 107  | 111  | 74   | 2.32     | 0.094146 | 58   | 66   | 56   | 36   | 24   | 51   | 30   | 2.00 | 0.019249 | 38   | 1.57     | 0.074886 |      |          |          |
| 258702_at | A13g08030 | unknown protein ; supported by full-length expressed protein                            | 1485 | 1554 | 1659 | 2035 | 2431  | 1802 | 1563 | 2089 | 0.75     | 0.050818 | 1608 | 1771 | 1565 | 2041 | 1775 | 1669 | 2007 | 1994 | 1648     | 1897 | 0.87     | 0.061450 | 1828 | 0.90     | 0.228864 |
| 258703_at | A13g07910 | unknown protein ; supported by full-length expressed protein                            | 987  | 986  | 973  | 1069 | 1171  | 1034 | 922  | 1091 | 0.84     | 0.074656 | 829  | 933  | 977  | 1255 | 946  | 879  | 954  | 936  | 913      | 994  | 0.92     | 0.422863 | 102  |          |          |

|             |           |                                                                                            |      |      |      |      |      |      |      |      |          |          |      |      |      |      |      |      |      |      |      |      |      |          |      |      |          |
|-------------|-----------|--------------------------------------------------------------------------------------------|------|------|------|------|------|------|------|------|----------|----------|------|------|------|------|------|------|------|------|------|------|------|----------|------|------|----------|
| 258594_at   | A13g04490 | hypothetical protein predicted by gene expression-related                                  | 164  | 204  | 230  | 245  | 259  | 196  | 199  | 233  | 0.85     | 0.278086 | 186  | 144  | 196  | 236  | 213  | 167  | 217  | 206  | 175  | 208  | 0.84 | 0.137510 | 205  | 0.85 | 0.304793 |
| 258595_at   | A13g04500 | unknown protein contains Pfam profile: RNA recognition motif (RRM)-containing              | 209  | 298  | 303  | 340  | 373  | 308  | 270  | 340  | 0.79     | 0.119967 | 244  | 342  | 299  | 448  | 314  | 287  | 321  | 307  | 295  | 335  | 0.88 | 0.393236 | 349  | 0.84 | 0.397818 |
| 258596_at   | A13g04510 | unknown protein                                                                            | 18   | 25   | 27   | 28   | 28   | 25   | 23   | 42   | 0.85     | 0.226207 | 20   | 22   | 31   | 23   | 19   | 20   | 24   | 19   | 25   | 21   | 1.17 | 0.237323 | 21   | 1.19 | 0.312483 |
| 258597_x_at | A13g04520 | hypothetical protein predicted by gene expression-related                                  | 38   | 61   | 58   | 61   | 58   | 48   | 40   | 55   | 0.85     | 0.226207 | 27   | 37   | 30   | 35   | 37   | 37   | 37   | 37   | 37   | 37   | 0.80 | 0.000308 | 38   | 0.77 | 0.000308 |
| 258598_at   | A13g04410 | hypothetical protein predicted by gene expression-related                                  | 11   | 14   | 18   | 14   | 18   | 13   | 14   | 15   | 0.94     | 0.726142 | 13   | 19   | 15   | 11   | 17   | 10   | 13   | 17   | 16   | 14   | 1.15 | 0.420989 | 13   | 1.23 | 0.353144 |
| 258599_at   | A13g04520 | L-allo-threonine aldolase, putative simi: threonine aldolase family protein                | 195  | 328  | 295  | 422  | 513  | 371  | 272  | 435  | 0.62     | 0.045982 | 414  | 454  | 403  | 626  | 524  | 444  | 541  | 492  | 423  | 525  | 0.81 | 0.040975 | 531  | 0.80 | 0.120669 |
| 258598_at   | A13g04470 | unknown protein contains Pfam profile: expressed protein                                   | 433  | 481  | 450  | 507  | 611  | 430  | 455  | 516  | 0.88     | 0.320001 | 384  | 315  | 381  | 495  | 438  | 333  | 452  | 448  | 360  | 433  | 0.83 | 0.113180 | 422  | 0.85 | 0.303538 |
| 258599_at   | A13g04600 | hypothetical protein predicted by gene expression-related                                  | 5751 | 6583 | 6470 | 6634 | 6430 | 6843 | 6270 | 6430 | 0.91     | 0.224030 | 5873 | 6880 | 5976 | 7026 | 6385 | 5973 | 6442 | 5933 | 6442 | 5933 | 0.83 | 0.114657 | 6415 | 0.82 | 0.255593 |
| 258570_at   | A13g04530 | phosphoenolpyruvate carboxylase kinase phosphoenolpyruvate carboxylase kinase              | 29   | 34   | 32   | 40   | 60   | 53   | 38   | 51   | 0.75     | 0.241473 | 38   | 23   | 44   | 27   | 22   | 29   | 51   | 44   | 35   | 35   | 1.01 | 0.977453 | 26   | 1.34 | 0.256265 |
| 258571_at   | A13g04420 | hypothetical protein predicted by gene expression-related                                  | 24   | 31   | 53   | 27   | 31   | 26   | 29   | 28   | 1.04     | 0.734088 | 21   | 21   | 26   | 24   | 22   | 22   | 22   | 28   | 25   | 23   | 0.85 | 0.830403 | 21   | 1.07 | 0.581898 |
| 258572_at   | A13g04270 | hypothetical protein                                                                       | 25   | 31   | 35   | 33   | 40   | 30   | 30   | 34   | 0.88     | 0.390647 | 20   | 19   | 24   | 22   | 15   | 19   | 21   | 25   | 21   | 20   | 1.02 | 0.848974 | 19   | 1.12 | 0.432201 |
| 258573_at   | A13g04260 | hypothetical protein contains Pfam profile: SAP domain-containing protein                  | 178  | 269  | 235  | 213  | 273  | 181  | 228  | 222  | 1.02     | 0.349633 | 197  | 172  | 191  | 203  | 185  | 169  | 199  | 195  | 187  | 190  | 0.98 | 0.742499 | 186  | 1.01 | 0.935670 |
| 258574_at   | A13g04250 | hypothetical protein                                                                       | 22   | 21   | 28   | 24   | 28   | 27   | 20   | 20   | 0.90     | 0.245623 | 20   | 20   | 26   | 21   | 19   | 18   | 17   | 22   | 19   | 11   | 1.17 | 0.124377 | 19   | 1.12 | 0.343530 |
| 258575_at   | A13g04240 | putative O-linked GlcNAc transferase s O-linked N-acetyl glucosamine transferase           | 342  | 467  | 476  | 456  | 543  | 367  | 428  | 455  | 0.94     | 0.708097 | 339  | 287  | 351  | 468  | 393  | 338  | 405  | 398  | 326  | 400  | 0.81 | 0.052769 | 400  | 0.81 | 0.155586 |
| 258576_at   | A13g04230 | putative 40S ribosomal protein S16 simi: 40S ribosomal protein S16 (RPS16B)                | 408  | 417  | 489  | 493  | 472  | 435  | 485  | 0.90 | 0.107762 | 643      | 644  | 690  | 868  | 646  | 658  | 686  | 647  | 659  | 701  | 701  | 0.94 | 0.495103 | 724  | 0.91 | 0.428200 |
| 258577_at   | A13g04220 | putative disease resistance protein simi: disease resistance protein (TIR-NBS-LR)          | 37   | 37   | 45   | 38   | 48   | 39   | 39   | 42   | 0.95     | 0.640544 | 34   | 38   | 48   | 41   | 33   | 39   | 37   | 40   | 40   | 38   | 1.05 | 0.632163 | 38   | 1.06 | 0.679137 |
| 258578_at   | A13g04200 | ceerin-like protein contains Pfam profile: germin-like protein, putative                   | 35   | 32   | 37   | 34   | 37   | 32   | 35   | 34   | 1.01     | 0.900342 | 28   | 24   | 31   | 30   | 25   | 28   | 30   | 25   | 27   | 27   | 1.02 | 0.818924 | 27   | 1.03 | 0.795084 |
| 258579_s_at | A13g04190 | ceerin-like protein contains Pfam profile: ceerin-like protein, putative // ceerin-III     | 11   | 10   | 16   | 12   | 13   | 15   | 13   | 14   | 0.91     | 0.591879 | 15   | 25   | 16   | 13   | 11   | 14   | 17   | 11   | 19   | 13   | 1.40 | 0.108256 | 13   | 1.44 | 0.175928 |
| 258580_at   | A13g04170 | ceerin-like protein contains Pfam profile: germin-like protein, putative                   | 24   | 33   | 35   | 36   | 41   | 37   | 31   | 38   | 0.81     | 0.107200 | 22   | 29   | 32   | 30   | 26   | 26   | 28   | 28   | 28   | 28   | 1.00 | 0.984883 | 27   | 1.01 | 0.937676 |
| 258581_at   | A13g04160 | hypothetical protein predicted by gene expression-related                                  | 63   | 101  | 100  | 91   | 109  | 87   | 88   | 96   | 0.92     | 0.626655 | 59   | 51   | 61   | 73   | 59   | 51   | 60   | 56   | 57   | 60   | 0.95 | 0.615725 | 61   | 0.94 | 0.619235 |
| 258582_at   | A13g04150 | hypothetical protein contains Pfam profile: germin-like protein, putative                  | 25   | 28   | 36   | 33   | 37   | 37   | 44   | 37   | 0.81     | 0.162529 | 21   | 23   | 33   | 25   | 22   | 24   | 38   | 32   | 25   | 28   | 0.91 | 0.605240 | 23   | 1.08 | 0.640925 |
| 258583_at   | A13g04100 | putative SRF-vivo transcription factor c MAD5-box family protein                           | 57   | 62   | 110  | 90   | 97   | 91   | 77   | 92   | 0.83     | 0.404597 | 39   | 34   | 47   | 41   | 36   | 39   | 51   | 39   | 40   | 41   | 0.96 | 0.745302 | 39   | 1.03 | 0.798921 |
| 258584_at   | A13g04090 | hypothetical protein predicted by gene expression-related                                  | 475  | 561  | 580  | 766  | 815  | 671  | 539  | 751  | 0.72     | 0.045928 | 720  | 723  | 657  | 1210 | 867  | 801  | 973  | 868  | 700  | 944  | 0.74 | 0.045925 | 960  | 0.73 | 0.113584 |
| 258585_at   | A13g04340 | unknown protein C-term similar to cell c FtsH protease family protein                      | 155  | 203  | 186  | 199  | 232  | 180  | 181  | 204  | 0.89     | 0.344851 | 180  | 164  | 201  | 186  | 173  | 152  | 187  | 171  | 182  | 174  | 1.05 | 0.511733 | 170  | 1.07 | 0.472746 |
| 258586_s_at | A13g04320 | putative trypsin inhibitor similar to trypsin trypsin and protease inhibitor family prot   | 10   | 10   | 8    | 12   | 16   | 11   | 10   | 13   | 0.73     | 0.091049 | 5    | 9    | 8    | 11   | 14   | 10   | 11   | 7    | 8    | 11   | 0.71 | 0.132149 | 12   | 0.65 | 0.092478 |
| 258587_at   | A13g04310 | hypothetical protein predicted by gene expression-related                                  | 149  | 193  | 220  | 225  | 237  | 185  | 187  | 216  | 0.87     | 0.330633 | 132  | 141  | 151  | 165  | 141  | 134  | 129  | 134  | 141  | 141  | 1.00 | 0.957702 | 147  | 0.96 | 0.632753 |
| 258588_s_at | A13g04120 | glyceraldhyde-3-phosphate dehydrogenase glyceraldehyde-3-phosphate dehydrogenase           | 1720 | 1922 | 2030 | 2809 | 2741 | 2369 | 1891 | 2640 | 0.72     | 0.010280 | 1686 | 1554 | 1685 | 2529 | 2111 | 1772 | 1864 | 1857 | 1641 | 2026 | 0.81 | 0.084468 | 2137 | 0.77 | 0.090648 |
| 258589_at   | A13g04290 | putative GDSL motif lipase/acetylhydrolase GDSL-motif lipase/hydrolase family prot         | 195  | 1550 | 843  | 908  | 1064 | 686  | 1129 | 886  | 1.27     | 0.371302 | 627  | 705  | 747  | 607  | 468  | 449  | 467  | 434  | 693  | 485  | 1.43 | 0.005369 | 508  | 1.36 | 0.038923 |
| 258590_at   | A13g04280 | putative response regulator protein simi: two-component responsive regulator fan           | 16   | 19   | 25   | 19   | 26   | 20   | 20   | 22   | 0.93     | 0.641838 | 27   | 32   | 34   | 30   | 19   | 16   | 18   | 15   | 19   | 17   | 1.83 | 0.000296 | 17   | 1.81 | 0.004328 |
| 258591_at   | A13g04360 | hypothetical protein predicted by gene expression-related                                  | 47   | 68   | 79   | 64   | 85   | 73   | 61   | 62   | 0.78     | 0.175020 | 31   | 31   | 40   | 41   | 34   | 30   | 40   | 43   | 32   | 38   | 0.80 | 0.430271 | 40   | 0.80 | 0.395494 |
| 258592_at   | A13g04310 | hypothetical protein contains Pfam profile: pentatricopeptide repeat (PPR) repeat-containi | 81   | 112  | 121  | 123  | 137  | 114  | 105  | 125  | 0.84     | 0.219403 | 96   | 93   | 91   | 130  | 99   | 95   | 123  | 98   | 109  | 86   | 1.06 | 0.158920 | 108  | 0.86 | 0.254311 |
| 258593_at   | A13g04350 | unknown protein : supported by cDNA: expressed protein                                     | 144  | 210  | 251  | 216  | 223  | 166  | 201  | 202  | 1.00     | 0.989415 | 175  | 186  | 195  | 245  | 193  | 173  | 200  | 185  | 186  | 199  | 0.93 | 0.440570 | 204  | 0.91 | 0.451798 |
| 258594_at   | A13g04110 | putative glutamate receptor (GLR1) ide alactate receptor family protein (GLR1)             | 19   | 22   | 27   | 24   | 42   | 26   | 23   | 31   | 0.74     | 0.275722 | 19   | 20   | 27   | 18   | 23   | 22   | 20   | 19   | 22   | 20   | 1.07 | 0.537230 | 21   | 1.04 | 0.778625 |
| 258595_at   | A13g04080 | aprasin (Atapx1) identical to aprasin (APY1)                                               | 87   | 91   | 101  | 115  | 119  | 85   | 93   | 109  | 0.85     | 0.123863 | 68   | 61   | 66   | 84   | 75   | 64   | 68   | 67   | 58   | 72   | 0.81 | 0.057574 | 75   | 0.78 | 0.086718 |
| 258597_at   | A13g04210 | putative disease resistance protein simi: disease resistance protein (TIR-NBS drc          | 29   | 36   | 37   | 38   | 51   | 37   | 34   | 42   | 0.81     | 0.196914 | 29   | 25   | 25   | 27   | 24   | 26   | 24   | 26   | 26   | 26   | 1.02 | 0.648967 | 26   | 1.03 | 0.666171 |
| 258598_at   | A13g06950 | putative tRNA pseudouridine synthase tRNA pseudouridine synthase family chr                | 92   | 139  | 149  | 148  | 160  | 115  | 127  | 141  | 0.90     | 0.556561 | 151  | 162  | 166  | 216  | 152  | 168  | 168  | 157  | 160  | 172  | 0.93 | 0.456314 | 179  | 0.89 | 0.397011 |
| 258599_at   | A13g06970 | putative RNA-binding protein contains RNA recognition motif (RRM)-containing               | 19   | 16   | 23   | 21   | 24   | 23   | 20   | 23   | 0.86     | 0.208590 | 17   | 17   | 22   | 16   | 18   | 25   | 15   | 15   | 19   | 18   | 1.04 | 0.806590 | 20   | 0.94 | 0.743486 |
| 258600_at   | A13g06960 | hypothetical protein predicted by gene expression-related                                  | 32   | 42   | 38   | 41   | 38   | 44   | 37   | 41   | 0.81     | 0.342212 | 27   | 32   | 30   | 32   | 27   | 25   | 36   | 32   | 31   | 30   | 1.03 | 0.805257 | 34   | 1.00 | 0.460564 |
| 258601_at   | A13g07000 | hypothetical protein                                                                       | 29   | 38   | 47   | 46   | 43   | 47   | 38   | 45   | 0.84     | 0.231609 | 27   | 35   | 31   | 34   | 31   | 27   | 37   | 31   | 31   | 32   | 0.97 | 0.780329 | 31   | 1.01 | 0.901360 |
| 258602_at   | A13g07030 | unknown protein                                                                            | 553  | 768  | 782  | 896  | 999  | 836  | 701  | 910  | 0.77     | 0.076163 | 625  | 550  | 664  | 889  | 760  | 690  | 774  | 748  | 613  | 772  | 0.79 | 0.018716 | 780  | 0.79 | 0.068376 |
| 258603_at   | A13g06870 | unknown protein                                                                            | 27   | 29   | 40   | 40   | 39   | 39   | 32   | 39   | 0.81     | 0.139382 | 25   | 22   | 31   | 25   | 24   | 21   | 30   | 23   | 26   | 25   | 1.06 | 0.590838 | 23   | 1.13 | 0.344727 |
| 258604_at   | A13g07040 | disease resistance gene (RPM1) identifi disease resistance protein RPM1 (CC-N              | 30   | 38   | 37   | 40   | 37   | 37   | 40   | 32   | 0.85     | 0.139882 | 25   | 40   | 33   | 27   | 24   | 25   | 28   | 31   | 25   | 27   | 0.94 | 0.431549 | 25   | 1.01 | 0.818554 |
| 258605_at   | A13g07050 | putative GTPase contains Pfam profile: GTP-binding family protein                          | 311  | 311  | 311  | 371  | 313  | 294  | 352  | 0.84 | 0.089412 | 149      | 110  | 158  | 139  | 164  | 150  | 138  | 163  | 157  | 137  | 164  | 0.85 | 0.186409 | 164  | 0.85 | 0.194807 |
| 258606_at   | A13g07060 | hypothetical protein predicted by gene expression-related                                  | 119  | 141  | 146  | 160  | 165  | 127  | 135  | 151  | 0.90     | 0.347784 | 96   | 100  | 116  | 150  | 113  | 103  | 101  | 108  | 104  | 115  | 0.91 | 0.423971 | 122  | 0.85 | 0.317463 |
| 258607_at   | A13g06895 | unknown protein                                                                            | 9    | 9    | 7    | 7    | 9    | 8    | 8    | 8    | 1.01     | 0.935300 | 6    | 7    | 9    | 7    | 8    | 7    | 11   | 8    | 7    | 8    | 0.90 | 0.510446 | 7    | 1.01 | 0.961344 |
| 258608_at   | A13g06910 | hypothetical protein                                                                       | 95   | 131  | 136  | 143  | 154  | 127  | 121  | 141  | 0.85     | 0.245613 | 105  | 117  | 120  | 161  | 115  | 103  | 109  | 107  | 114  | 119  | 0.95 | 0.719467 | 126  | 0.90 | 0.525281 |
| 258609_at   | A13g06930 | putative acinase methyltransferase simi: acinase N-methyltransferase fan                   | 191  | 229  | 222  | 261  | 282  | 246  | 217  | 277  | 0.80     | 0.117650 | 194  | 211  | 198  | 222  | 208  | 196  | 208  | 199  | 207  | 214  | 0.92 | 0.200709 | 212  | 0.92 | 0.200709 |
| 258610_at   | A13g06940 | putative mudrA protein similar to mudrA: Mutator-like transposase family                   | 141  | 179  | 172  | 195  | 204  | 167  | 164  | 189  | 0.87     | 0.205859 | 131  | 108  | 127  | 164  | 147  | 108  | 151  | 138  | 122  | 141  | 0.86 | 0.199684 | 140  | 0.87 | 0.382486 |
| 258611_at   | A13g06890 | hypothetical protein predicted by                                                          |      |      |      |      |      |      |      |      |          |          |      |      |      |      |      |      |      |      |      |      |      |          |      |      |          |

|             |           |                                                                                     |      |      |      |      |      |      |      |      |          |          |          |      |      |      |      |      |      |      |      |      |          |          |          |          |          |          |
|-------------|-----------|-------------------------------------------------------------------------------------|------|------|------|------|------|------|------|------|----------|----------|----------|------|------|------|------|------|------|------|------|------|----------|----------|----------|----------|----------|----------|
| 258473_s_at | A33g02610 | putative stearyl-acyl carrier protein de acyl-(acyl-carrier-protein) desaturase, ox | 66   | 70   | 108  | 87   | 108  | 84   | 81   | 93   | 0.87     | 0.480386 | 85       | 87   | 92   | 84   | 77   | 68   | 98   | 84   | 88   | 82   | 1.07     | 0.424579 | 76       | 1.15     | 0.085028 |          |
| 258474_at   | A33g02650 | putative protein predicted by gensec pentacyclic-peptide (PPR) repeat-containi      | 302  | 330  | 378  | 431  | 428  | 352  | 337  | 404  | 0.83     | 0.120126 | 258      | 222  | 310  | 350  | 311  | 277  | 281  | 289  | 263  | 301  | 0.87     | 0.191671 | 73       | 1.15     | 0.213076 |          |
| 258475_at   | A33g02660 | outative tyrosyl-RNA synthetase simila RNA synthetase class I (W and Y1 fami        | 194  | 248  | 230  | 273  | 271  | 225  | 224  | 256  | 0.87     | 0.219887 | 190      | 184  | 247  | 286  | 237  | 179  | 248  | 252  | 207  | 241  | 0.86     | 0.267356 | 234      | 0.88     | 0.490959 |          |
| 258476_at   | A33g02670 | putative protein predicted by gensec full-length-associated domain-containi         | 105  | 136  | 151  | 160  | 161  | 131  | 162  | 150  | 0.87     | 0.107444 | 128      | 138  | 143  | 141  | 220  | 164  | 139  | 146  | 138  | 143  | 0.86     | 0.315165 | 176      | 0.88     | 0.116377 |          |
| 258477_at   | A33g02680 | putative protein predicted by gensec hydrophobic protein                            | 102  | 142  | 130  | 156  | 132  | 125  | 140  | 0.89 | 0.356596 | 94       | 79       | 90   | 115  | 87   | 87   | 103  | 93   | 88   | 97   | 0.90 | 0.272757 | 96       | 0.91     | 0.447091 |          |          |
| 258478_at   | A33g02710 | unknown protein                                                                     | 258  | 383  | 384  | 442  | 544  | 386  | 342  | 458  | 0.75     | 0.137781 | 301      | 275  | 273  | 413  | 322  | 328  | 372  | 338  | 283  | 355  | 0.80     | 0.022769 | 354      | 0.80     | 0.081090 |          |
| 258479_at   | A33g02440 | putative protein predicted by gensec expressed protein                              | 257  | 384  | 37   | 33   | 38   | 36   | 33   | 36   | 0.91     | 0.393977 | 27       | 24   | 35   | 28   | 29   | 25   | 29   | 28   | 28   | 1.04 | 0.632362 | 27       | 1.06     | 0.633341 |          |          |
| 258480_at   | A33g02450 | putative protein supported by full-len expressed protein                            | 197  | 1131 | 992  | 1201 | 1422 | 1156 | 1021 | 1057 | 0.89     | 0.120116 | 1010     | 1001 | 1021 | 1559 | 1254 | 1143 | 1131 | 1068 | 1243 | 1388 | 0.88     | 0.276558 | 1329     | 0.88     | 0.172159 |          |
| 258481_at   | A33g02600 | outative chosholatide chosohydrolytic chosohalidic acid chosohalase family or       | 384  | 526  | 515  | 591  | 672  | 526  | 475  | 597  | 0.80     | 0.122569 | 430      | 491  | 497  | 708  | 510  | 476  | 580  | 531  | 467  | 557  | 0.84     | 0.151716 | 564      | 0.83     | 0.259559 |          |
| 258482_at   | A33g02530 | outative chaperonin similar to chaperon chaperonin, putative                        | 793  | 929  | 913  | 1146 | 1220 | 1013 | 878  | 1126 | 0.78     | 0.029150 | 762      | 698  | 808  | 999  | 882  | 792  | 851  | 880  | 756  | 881  | 0.86     | 0.049241 | 891      | 0.85     | 0.117530 |          |
| 258483_at   | A33g02570 | outative mannose-6-phosphate isomer: chosohomannose isomerase tyoe I fami           | 196  | 140  | 136  | 153  | 157  | 136  | 128  | 149  | 0.86     | 0.147602 | 120      | 128  | 132  | 187  | 162  | 128  | 155  | 148  | 127  | 156  | 0.81     | 0.064832 | 159      | 0.80     | 0.136406 |          |
| 258484_at   | A33g02580 | sterol-C5-desaturase identical to GB-A delta 7-sterol-C5-desaturase (STE1)          | 169  | 195  | 166  | 287  | 201  | 232  | 192  | 273  | 0.70     | 0.032928 | 255      | 287  | 295  | 415  | 323  | 308  | 279  | 269  | 272  | 319  | 0.85     | 0.240567 | 349      | 0.78     | 0.095948 |          |
| 258485_at   | A33g02630 | putative stearyl-acyl carrier protein de acyl-(acyl-carrier-protein) desaturase, p  | 307  | 407  | 416  | 603  | 607  | 467  | 377  | 559  | 0.67     | 0.045017 | 408      | 403  | 427  | 687  | 548  | 478  | 492  | 461  | 413  | 533  | 0.77     | 0.071445 | 571      | 0.72     | 0.062814 |          |
| 258486_at   | A33g02560 | putative 40S ribosomal protein similar 1 40S ribosomal protein S7 (SPS7B)           | 1817 | 2232 | 2292 | 2064 | 2142 | 1817 | 2114 | 2008 | 1.05     | 0.584543 | 2139     | 2321 | 2330 | 2835 | 2232 | 2160 | 2350 | 2381 | 2263 | 2391 | 0.95     | 0.462632 | 2409     | 0.94     | 0.549033 |          |
| 258487_at   | A33g02550 | unknown protein : supported by full-len LOB domain protein 41 / lateral organ b     | 678  | 760  | 667  | 1097 | 1043 | 1032 | 702  | 1057 | 0.66     | 0.005051 | 893      | 864  | 1201 | 1501 | 1186 | 1023 | 991  | 979  | 986  | 1136 | 0.87     | 0.365550 | 1237     | 0.80     | 0.230078 |          |
| 258488_at   | A33g02420 | unknown protein : supported by full-len expressed protein                           | 425  | 515  | 593  | 611  | 636  | 560  | 511  | 603  | 0.85     | 0.160826 | 522      | 652  | 602  | 876  | 619  | 990  | 672  | 633  | 592  | 678  | 0.87     | 0.289355 | 695      | 0.85     | 0.355442 |          |
| 258489_at   | A33g02520 | 14-3-3 protein GF14n (ortf) identical 1 14-3-3 protein GF14 nu (GRF7)               | 1013 | 1240 | 1301 | 1339 | 1504 | 1207 | 1184 | 1350 | 0.88     | 0.248206 | 1292     | 1319 | 1376 | 1708 | 1452 | 1386 | 1278 | 1227 | 1329 | 1410 | 0.84     | 0.502451 | 1155     | 0.88     | 0.139780 |          |
| 258490_at   | A33g02670 | hydrothetical protein predicted by gensec prolme-rich family protein                | 32   | 28   | 32   | 32   | 33   | 29   | 31   | 31   | 0.97     | 0.608324 | 31       | 53   | 44   | 28   | 29   | 27   | 38   | 30   | 43   | 30   | 1.42     | 0.051743 | 28       | 1.54     | 0.071467 |          |
| 258491_at   | A33g02700 | unknown protein : supported by full-len IC domain-containing protein                | 538  | 780  | 843  | 868  | 1000 | 795  | 721  | 888  | 0.81     | 0.205351 | 777      | 787  | 837  | 1101 | 943  | 857  | 1035 | 963  | 800  | 980  | 0.82     | 0.019670 | 967      | 0.83     | 0.086446 |          |
| 258492_at   | A33g02390 | unknown protein                                                                     | 25   | 45   | 50   | 34   | 58   | 30   | 40   | 41   | 0.97     | 0.931702 | 22       | 14   | 17   | 18   | 17   | 15   | 81   | 22   | 18   | 21   | 0.87     | 0.543033 | 17       | 1.08     | 0.628756 |          |
| 258493_at   | A33g02555 | Expressed protein : supported by full-expressed protein                             | 114  | 165  | 164  | 192  | 194  | 155  | 148  | 181  | 0.82     | 0.191586 | 161      | 160  | 182  | 166  | 177  | 168  | 155  | 168  | 167  | 0.90 | 0.418091 | 204      | 0.82     | 0.191120 |          |          |
| 258494_at   | A33g02450 | cell division protein FtsH-like protein cell division protein ftsH, putative        | 155  | 200  | 205  | 203  | 212  | 178  | 187  | 198  | 0.94     | 0.588864 | 145      | 133  | 164  | 182  | 166  | 152  | 171  | 186  | 147  | 171  | 0.86     | 0.058296 | 167      | 0.88     | 0.193183 |          |
| 258495_at   | A33g02690 | unknown protein : supported by full-len integral membrane family protein            | 116  | 198  | 212  | 194  | 215  | 160  | 175  | 190  | 0.93     | 0.698552 | 185      | 193  | 182  | 288  | 224  | 227  | 243  | 217  | 187  | 240  | 0.78     | 0.020939 | 246      | 0.76     | 0.046128 |          |
| 258496_at   | A33g02460 | outative clant adhesion molecule simila ptan adhesion molecule, putative            | 138  | 173  | 176  | 203  | 245  | 163  | 162  | 204  | 0.77     | 0.187450 | 133      | 122  | 139  | 204  | 177  | 155  | 155  | 151  | 131  | 168  | 0.78     | 0.037993 | 179      | 0.73     | 0.035053 |          |
| 258497_at   | A33g02380 | putative flowering-time gene CONSTAT zinc finger protein CONSTANS-LIKE 2 (          | 46   | 83   | 98   | 60   | 63   | 47   | 76   | 54   | 1.41     | 0.243220 | 32       | 32   | 42   | 63   | 50   | 38   | 37   | 32   | 35   | 44   | 0.81     | 0.328090 | 50       | 0.71     | 0.140834 |          |
| 258498_at   | A33g02480 | unknown protein similar to pollen coat t-ABA-responsive protein-related             | 39   | 22   | 756  | 63   | 26   | 21   | 273  | 37   | 743      | 0.83     | 0.385324 | 19   | 19   | 15   | 25   | 20   | 21   | 26   | 25   | 17   | 23       | 0.75     | 0.030313 | 22       | 0.80     | 0.130077 |
| 258499_at   | A33g02540 | putative RAD23 similar to RAD23 protein ubiquitin family protein                    | 192  | 260  | 277  | 265  | 322  | 231  | 243  | 273  | 0.89     | 0.465390 | 192      | 219  | 192  | 265  | 214  | 221  | 239  | 234  | 201  | 235  | 0.76     | 0.047851 | 233      | 0.86     | 0.154707 |          |
| 258500_at   | A33g02470 | S-adenosylmethionine decarboxylase i adenosylmethionine decarboxylase fami          | 3250 | 4157 | 4548 | 4659 | 5110 | 4341 | 3985 | 4703 | 0.85     | 0.181546 | 2419     | 2545 | 2853 | 3964 | 3557 | 2954 | 3676 | 3760 | 2539 | 3582 | 0.71     | 0.004181 | 3492     | 0.73     | 0.034087 |          |
| 258498_at   | A33g08040 | hydrothetical protein contains similar : ribosomal protein L12 family protein       | 491  | 672  | 568  | 663  | 705  | 623  | 577  | 674  | 0.86     | 0.171045 | 720      | 766  | 811  | 1155 | 862  | 864  | 750  | 698  | 766  | 866  | 0.88     | 0.386573 | 960      | 0.80     | 0.125921 |          |
| 258497_at   | A33g08040 | unknown protein: short-chain dehydrogenase/reductase (S                             | 148  | 213  | 268  | 259  | 235  | 242  | 235  | 289  | 0.87     | 0.061582 | 158      | 160  | 182  | 215  | 180  | 186  | 178  | 168  | 179  | 200  | 0.86     | 0.152901 | 200      | 0.85     | 0.236706 |          |
| 258498_at   | A33g06070 | unknown protein predicted by gensec: expressed protein                              | 18   | 19   | 28   | 25   | 27   | 22   | 21   | 25   | 0.85     | 0.272324 | 22       | 17   | 22   | 15   | 17   | 15   | 21   | 19   | 21   | 17   | 1.18     | 0.152318 | 16       | 1.31     | 0.056861 |          |
| 258499_at   | A33g06050 | unknown protein contains Pfam profile: alkyl hydroperoxide reductase/thiol spec     | 386  | 541  | 522  | 652  | 724  | 588  | 483  | 654  | 0.74     | 0.052040 | 649      | 737  | 750  | 943  | 765  | 730  | 726  | 656  | 712  | 764  | 0.93     | 0.475765 | 813      | 0.88     | 0.241717 |          |
| 258470_at   | A33g06035 | Expressed protein : supported by full-expressed protein                             | 110  | 145  | 126  | 180  | 209  | 159  | 127  | 183  | 0.70     | 0.034213 | 94       | 88   | 107  | 178  | 156  | 129  | 115  | 103  | 96   | 136  | 0.71     | 0.077352 | 154      | 0.62     | 0.019608 |          |
| 258471_at   | A33g06030 | NPK1-related protein kinase 3 identical NPK1-related protein kinase. putative (A    | 211  | 263  | 231  | 259  | 305  | 242  | 235  | 289  | 0.87     | 0.032901 | 217      | 259  | 214  | 214  | 209  | 174  | 183  | 169  | 171  | 190  | 0.90     | 0.400793 | 199      | 0.86     | 0.341094 |          |
| 258472_at   | A33g06080 | unknown protein identical to unknown c-expressed protein                            | 130  | 210  | 219  | 245  | 250  | 178  | 186  | 224  | 0.83     | 0.360585 | 101      | 127  | 107  | 188  | 136  | 132  | 160  | 151  | 111  | 153  | 0.73     | 0.028082 | 152      | 0.73     | 0.109935 |          |
| 258442_at   | A33g01015 | hydrothetical protein predicted by gensec: expressed protein                        | 39   | 41   | 46   | 43   | 57   | 39   | 42   | 47   | 0.90     | 0.483747 | 33       | 40   | 43   | 34   | 40   | 34   | 34   | 39   | 36   | 1.07 | 0.443767 | 38       | 1.07     | 0.495593 |          |          |
| 258443_at   | A33g02280 | unknown protein                                                                     | 46   | 61   | 66   | 66   | 80   | 58   | 54   | 68   | 0.80     | 0.204510 | 36       | 39   | 41   | 58   | 48   | 45   | 65   | 46   | 37   | 50   | 0.77     | 0.018192 | 50       | 0.77     | 0.049295 |          |
| 258444_at   | A33g02380 | expressed protein supported by cDNA: expressed protein                              | 609  | 673  | 699  | 773  | 894  | 650  | 567  | 759  | 0.73     | 0.067696 | 602      | 640  | 615  | 816  | 737  | 610  | 768  | 662  | 589  | 737  | 0.80     | 0.021545 | 721      | 0.82     | 0.105074 |          |
| 258445_at   | A33g02400 | putative lipovisenease similar to lipovisenease, putative                           | 58   | 67   | 63   | 61   | 61   | 64   | 62   | 49   | 1.28     | 0.107082 | 32       | 33   | 45   | 34   | 35   | 30   | 33   | 31   | 37   | 33   | 1.12     | 0.260186 | 33       | 1.11     | 0.447886 |          |
| 258446_at   | A33g02430 | hydrothetical protein predicted by gensec: expressed protein                        | 66   | 97   | 105  | 99   | 110  | 85   | 89   | 98   | 0.91     | 0.568501 | 58       | 51   | 62   | 86   | 60   | 62   | 68   | 66   | 57   | 68   | 0.83     | 0.125271 | 69       | 0.82     | 0.228414 |          |
| 258447_at   | A33g02450 | hydrothetical protein predicted by gensec: expressed protein                        | 41   | 54   | 63   | 55   | 69   | 55   | 52   | 60   | 0.88     | 0.406025 | 42       | 47   | 52   | 51   | 48   | 47   | 55   | 52   | 47   | 51   | 0.93     | 0.230368 | 48       | 0.97     | 0.704729 |          |
| 258448_at   | A33g02280 | unknown protein                                                                     | 543  | 567  | 584  | 654  | 536  | 547  | 586  | 547  | 0.86     | 0.802272 | 672      | 478  | 579  | 697  | 609  | 520  | 678  | 628  | 577  | 646  | 0.89     | 0.187297 | 642      | 0.90     | 0.353968 |          |
| 258449_s_at | A33g02310 | putative RNA helicase similar to RNA DEAD box RNA helicase, putative (RH9           | 796  | 923  | 985  | 1224 | 1243 | 1100 | 901  | 1189 | 0.77     | 0.015718 | 804      | 522  | 791  | 654  | 807  | 713  | 654  | 807  | 713  | 654  | 0.87     | 0.027585 | 755      | 0.77     | 0.111166 |          |
| 258450_at   | A33g02340 | unknown protein predicted by gensec: cytochrome b5 reductase/oxidoreductase         | 73   | 86   | 79   | 95   | 108  | 94   | 80   | 99   | 0.81     | 0.031033 | 47       | 38   | 62   | 66   | 56   | 57   | 56   | 57   | 49   | 58   | 0.84     | 0.157229 | 60       | 0.82     | 0.242689 |          |
| 258451_at   | A33g02360 | alternative oxidase 1b precursor identic alternative oxidase 1b, mitochondrial (A   | 23   | 34   | 45   | 39   | 44   | 47   | 34   | 44   | 0.78     | 0.250382 | 29       | 31   | 32   | 29   | 32   | 34   | 32   | 31   | 31   | 31   | 0.99     | 0.097369 | 29       | 1.04     | 0.513109 |          |
| 258452_at   | A33g02370 | alternative oxidase 1a precursor identic alternative oxidase 1a, mitochondrial (A   | 116  | 124  | 177  | 120  | 141  | 93   | 139  | 118  | 1.18     | 0.410898 | 136      | 173  | 142  | 115  | 106  | 102  | 121  | 119  | 151  | 113  | 1.34     | 0.007947 | 108      | 1.40     | 0.023482 |          |
| 258453_at   | A33g02370 | RNA polymerase I, II and III 24.3 kDa : DNA-directed RNA polymerase, outative       | 1161 | 1385 | 1453 | 1939 | 1623 | 1333 | 1522 | 0.88 | 0.132853 | 1137     |          |      |      |      |      |      |      |      |      |      |          |          |          |          |          |          |

|             |           |                                                                                         |      |      |      |      |      |      |      |      |          |           |      |      |      |      |      |      |      |      |        |      |          |           |          |          |          |          |
|-------------|-----------|-----------------------------------------------------------------------------------------|------|------|------|------|------|------|------|------|----------|-----------|------|------|------|------|------|------|------|------|--------|------|----------|-----------|----------|----------|----------|----------|
| 258386_at   | A13g15520 | hypothetical protein predicted by gense peptidyl-prolyl cis-trans isomerase TLP3        | 75   | 95   | 80   | 99   | 101  | 77   | 80   | 92   | 0.86     | 0.343232  | 78   | 76   | 90   | 114  | 84   | 80   | 100  | 88   | 81     | 93   | 0.87     | 0.239017  | 92       | 0.88     | 0.396145 |          |
| 258387_at   | A13g15550 | hypothetical protein predicted by gense expressed protein                               | 64   | 97   | 94   | 114  | 119  | 96   | 89   | 110  | 0.81     | 0.097520  | 56   | 57   | 66   | 73   | 58   | 60   | 66   | 66   | 60     | 65   | 0.92     | 0.292763  | 64       | 0.94     | 0.518505 |          |
| 258388_at   | A13g15370 | outative exoanin S2 ocurensor similar i: euphane, putative (EXP12)                      | 52   | 98   | 78   | 69   | 75   | 76   | 63   | 73   | 0.86     | 0.254883  | 41   | 45   | 58   | 45   | 58   | 68   | 58   | 48   | 53     | 0.91 | 0.529592 | 46        | 1.05     | 0.712068 |          |          |
| 258389_at   | A13g15380 | hypothetical protein predicted by gense expressed protein                               | 68   | 77   | 84   | 81   | 95   | 83   | 70   | 87   | 0.88     | 0.103444  | 70   | 84   | 90   | 69   | 69   | 64   | 72   | 64   | 64     | 72   | 0.86     | 0.745713  | 70       | 0.86     | 0.952402 |          |
| 258390_at   | A13g15410 | unknown protein similar to leucine-rich: leucine-rich repeat family protein             | 223  | 288  | 255  | 341  | 355  | 257  | 256  | 318  | 0.80     | 0.155990  | 162  | 141  | 184  | 251  | 228  | 178  | 213  | 202  | 163    | 214  | 0.76     | 0.033286  | 219      | 0.74     | 0.086989 |          |
| 258391_at   | A13g15420 | hypothetical protein predicted by gense expressed protein                               | 111  | 141  | 134  | 138  | 173  | 126  | 128  | 145  | 0.88     | 0.370177  | 155  | 147  | 164  | 196  | 182  | 168  | 165  | 146  | 155    | 171  | 0.91     | 0.223656  | 182      | 0.85     | 0.048328 |          |
| 258392_at   | A13g15400 | anther development protein, ATA20 id: anther development protein, ATA20 ide             | 50   | 110  | 59   | 64   | 74   | 62   | 73   | 67   | 1.09     | 0.782469  | 53   | 55   | 55   | 77   | 60   | 57   | 63   | 56   | 54     | 63   | 0.87     | 0.163860  | 65       | 0.84     | 0.189014 |          |
| 258393_at   | A13g15400 | unknown protein similar to unknown prc expressed protein                                | 691  | 678  | 680  | 681  | 682  | 683  | 684  | 685  | 0.76     | 0.000000  | 686  | 687  | 688  | 689  | 690  | 691  | 692  | 693  | 694    | 695  | 0.81     | 0.091193  | 696      | 0.81     | 0.027679 |          |
| 258394_at   | A13g15530 | unknown protein : supported by full-len expressed protein                               | 719  | 717  | 819  | 1250 | 1351 | 1017 | 752  | 1206 | 0.62     | 0.012091  | 621  | 720  | 642  | 970  | 799  | 701  | 837  | 841  | 661    | 830  | 0.80     | 0.034373  | 823      | 0.80     | 0.126918 |          |
| 258395_at   | A13g15500 | outative isamonic acid regulatory protein no acid meristem (NAM) family protein         | 37   | 50   | 58   | 38   | 43   | 33   | 48   | 38   | 1.27     | 0.195780  | 48   | 58   | 47   | 42   | 50   | 52   | 56   | 51   | 51     | 50   | 1.01     | 0.856651  | 48       | 1.06     | 0.534332 |          |
| 258396_at   | A13g15460 | unknown protein similar to unknown or brix domain-containing protein                    | 239  | 248  | 279  | 401  | 396  | 335  | 255  | 377  | 0.68     | 0.007499  | 256  | 230  | 273  | 432  | 301  | 294  | 289  | 271  | 253    | 318  | 0.80     | 0.154539  | 343      | 0.74     | 0.126666 |          |
| 258397_at   | A13g15357 | Expressed protein : supported by full-len expressed protein                             | 55   | 55   | 79   | 51   | 42   | 44   | 63   | 46   | 0.38     | 0.103444  | 70   | 84   | 90   | 69   | 59   | 50   | 51   | 40   | 85     | 57   | 1.48     | 0.038956  | 55       | 0.92     | 0.019219 |          |
| 258398_at   | A13g15360 | thioredoxin mt identical to GB-AF159 thioredoxin M-type 4, chloroplast (TRX-M)          | 182  | 286  | 297  | 272  | 257  | 223  | 255  | 251  | 1.02     | 0.321424  | 278  | 345  | 309  | 435  | 333  | 319  | 396  | 378  | 310    | 372  | 0.83     | 0.098915  | 362      | 0.86     | 0.027945 |          |
| 258399_at   | A13g15540 | early auxin-induced protein, IAA19 ide: auxin-responsive protein / indoleacetic a       | 67   | 81   | 104  | 99   | 116  | 112  | 84   | 109  | 0.77     | 0.100376  | 60   | 60   | 69   | 84   | 69   | 69   | 66   | 63   | 63     | 70   | 0.89     | 0.204128  | 74       | 0.85     | 0.117092 |          |
| 258400_at   | A13g15470 | unknown protein : supported by cDNA: WD-40 repeat family protein                        | 133  | 161  | 150  | 173  | 214  | 114  | 151  | 148  | 0.73     | 0.109624  | 101  | 75   | 94   | 126  | 108  | 92   | 107  | 121  | 90     | 111  | 0.81     | 0.069925  | 109      | 0.83     | 0.198337 |          |
| 258401_at   | A13g15430 | unknown protein : supported by cDNA: regulator of chromosome condensation i             | 229  | 321  | 327  | 332  | 369  | 287  | 293  | 330  | 0.89     | 0.403319  | 295  | 276  | 293  | 387  | 341  | 283  | 353  | 362  | 288    | 349  | 0.83     | 0.052980  | 337      | 0.86     | 0.186491 |          |
| 258402_at   | A13g15450 | unknown protein very similar to unknown expressed protein                               | 5277 | 7128 | 7438 | 2509 | 4794 | 2138 | 6614 | 3147 | 2.10     | 0.031684  | 4666 | 5123 | 3556 | 3800 | 3717 | 4004 | 5124 | 5099 | 4415   | 4367 | 1.01     | 0.930194  | 3870     | 1.14     | 0.307542 |          |
| 258403_at   | A13g15380 | hypothetical protein predicted by gense: choline transporter-related                    | 228  | 292  | 322  | 367  | 398  | 318  | 284  | 361  | 0.79     | 0.112814  | 182  | 173  | 190  | 237  | 199  | 185  | 216  | 202  | 182    | 212  | 0.86     | 0.048881  | 214      | 0.85     | 0.117257 |          |
| 258404_at   | A13g17465 | ribosomal protein L3                                                                    | 244  | 320  | 361  | 355  | 360  | 291  | 308  | 335  | 0.92     | 0.550832  | 309  | 380  | 340  | 497  | 374  | 367  | 364  | 348  | 343    | 390  | 0.88     | 0.276829  | 413      | 0.83     | 0.214860 |          |
| 258405_at   | A13g17590 | unknown protein almost identical to SB transcription regulatory protein SNF5, p         | 232  | 338  | 378  | 325  | 380  | 272  | 316  | 325  | 0.97     | 0.871976  | 279  | 313  | 298  | 475  | 365  | 377  | 354  | 333  | 297    | 381  | 0.78     | 0.046322  | 406      | 0.73     | 0.039724 |          |
| 258406_at   | A13g17615 | hypothetical protein similar to hypoethl rhomboid family protein / zinc finger prot     | 138  | 101  | 196  | 231  | 308  | 225  | 172  | 254  | 0.68     | 0.005008  | 152  | 167  | 170  | 245  | 179  | 194  | 169  | 163  | 193    | 193  | 0.85     | 0.165194  | 200      | 0.82     | 0.187491 |          |
| 258407_at   | A13g17620 | unknown protein similar to unknown or F-box family protein                              | 34   | 30   | 46   | 52   | 48   | 48   | 37   | 50   | 0.74     | 0.061368  | 26   | 31   | 42   | 38   | 35   | 30   | 47   | 34   | 33     | 37   | 0.89     | 0.455621  | 34       | 0.96     | 0.783075 |          |
| 258408_at   | A13g17630 | unknown protein similar to outative Na+ calcium/hydroen exchanoe: outative (C3          | 80   | 88   | 105  | 104  | 116  | 110  | 91   | 110  | 0.83     | 0.080607  | 72   | 79   | 88   | 81   | 75   | 69   | 87   | 82   | 80     | 79   | 1.01     | 0.896510  | 75       | 1.06     | 0.490508 |          |
| 258409_at   | A13g17640 | hypothetical protein similar to GB-AABE leucine-rich repeat family protein              | 34   | 48   | 58   | 111  | 127  | 106  | 47   | 115  | 0.41     | 0.001854  | 61   | 53   | 67   | 131  | 112  | 99   | 110  | 112  | 60     | 113  | 0.53     | 0.000380  | 114      | 0.53     | 0.005738 |          |
| 258375_at   | A13g17470 | hypothetical protein predicted by genes Risk/SoT domain-containing protein / c          | 107  | 164  | 155  | 139  | 169  | 121  | 142  | 143  | 0.99     | 0.957112  | 143  | 140  | 148  | 148  | 105  | 178  | 140  | 159  | 151    | 144  | 167      | 0.86      | 0.194784 | 174      | 0.82     | 0.179439 |
| 258376_at   | A13g17680 | hypothetical protein similar to GB-AADi expressed protein                               | 662  | 971  | 737  | 1005 | 1305 | 844  | 790  | 1051 | 0.75     | 0.186221  | 431  | 406  | 443  | 677  | 505  | 505  | 450  | 423  | 427    | 512  | 0.83     | 0.202216  | 562      | 0.76     | 0.080228 |          |
| 258377_at   | A13g17690 | hypothetical protein contains similarity i: cyclic nucleotide-binding transporter 2 i / | 101  | 63   | 107  | 142  | 155  | 134  | 90   | 144  | 0.63     | 0.023872  | 98   | 87   | 81   | 121  | 88   | 72   | 130  | 122  | 89     | 107  | 0.83     | 0.286521  | 94       | 0.94     | 0.752790 |          |
| 258378_at   | A13g17490 | hypothetical protein contains similarity i: F-box family protein                        | 23   | 21   | 27   | 27   | 26   | 24   | 24   | 26   | 0.92     | 0.303605  | 23   | 28   | 28   | 28   | 24   | 22   | 36   | 25   | 26     | 27   | 0.98     | 0.863054  | 24       | 1.08     | 0.456712 |          |
| 258379_at   | A13g17520 | unknown protein identical to LEA-like o late embryo/ensoes abundant domain- $\alpha$    | 7    | 7    | 98   | 250  | 111  | 8    | 38   | 90   | 0.42     | 0.577452  | 5    | 9    | 8    | 7    | 7    | 8    | 9    | 79   | 509075 | 7    | 0.97     | 0.859642  | 7        | 0.97     | 0.859642 |          |
| 258345_at   | A13g17710 | unknown protein : supported by full-len F-box family protein                            | 72   | 91   | 10   | 11   | 13   | 12   | 12   | 12   | 12       | 0.1009415 | 72   | 68   | 79   | 78   | 71   | 78   | 78   | 78   | 78     | 78   | 1.15     | 0.154468  | 77       | 0.82     | 0.321677 |          |
| 258346_at   | A13g17610 | Expressed protein : supported by full-le ZIP2 transcription factor domain- $\alpha$     | 12   | 15   | 10   | 11   | 13   | 12   | 12   | 12   | 12       | 0.1009415 | 72   | 68   | 79   | 78   | 71   | 78   | 78   | 78   | 78     | 78   | 0.82     | 0.0490386 | 9        | 0.87     | 0.329877 |          |
| 258350_at   | A13g17510 | unknown protein similar to serine/threo CBL-interacting protein kinase 1 (CIPK1         | 128  | 203  | 200  | 174  | 217  | 148  | 177  | 180  | 0.99     | 0.937353  | 121  | 116  | 130  | 194  | 185  | 146  | 153  | 151  | 122    | 166  | 0.74     | 0.019091  | 175      | 0.70     | 0.027357 |          |
| 258351_at   | A13g17700 | hypothetical protein contains similarity i: cyclic nucleotide-binding transporter 1 i / | 128  | 216  | 231  | 213  | 239  | 195  | 212  | 216  | 0.98     | 0.838956  | 125  | 126  | 163  | 203  | 163  | 149  | 191  | 178  | 138    | 177  | 0.78     | 0.049321  | 172      | 0.80     | 0.175060 |          |
| 258352_at   | A13g17640 | outative auxin-induced protein similar to auxin-responsive protein, putative            | 47   | 58   | 72   | 68   | 84   | 68   | 59   | 73   | 0.81     | 0.190785  | 35   | 55   | 50   | 47   | 45   | 56   | 55   | 47   | 45     | 46   | 0.94     | 0.018339  | 46       | 1.02     | 0.869687 |          |
| 258353_s_at | A13g17650 | unknown protein similar to GB-AAD497 closoeptide-transporter OPT family prot            | 105  | 136  | 126  | 179  | 214  | 154  | 122  | 182  | 0.67     | 0.038457  | 75   | 66   | 76   | 119  | 115  | 106  | 120  | 118  | 72     | 116  | 0.82     | 0.000042  | 114      | 0.64     | 0.001124 |          |
| 258354_at   | A13g14320 | outative zinc finger protein similar to RI zinc finger (C3HC4-type RING finger) fa      | 21   | 20   | 31   | 24   | 28   | 27   | 24   | 26   | 0.91     | 0.541219  | 22   | 17   | 24   | 22   | 19   | 18   | 20   | 24   | 21     | 20   | 1.03     | 0.812467  | 19       | 1.08     | 0.585638 |          |
| 258355_at   | A13g14330 | hypothetical protein predicted by gense pentatricopeptide (PPR) repeat-contains         | 49   | 104  | 102  | 110  | 112  | 98   | 92   | 107  | 0.86     | 0.272123  | 55   | 53   | 62   | 76   | 64   | 63   | 59   | 67   | 57     | 66   | 0.86     | 0.080848  | 68       | 0.84     | 0.092356 |          |
| 258356_at   | A13g14340 | unknown protein                                                                         | 59   | 83   | 64   | 65   | 68   | 69   | 67   | 1.03 | 0.705059 | 33        | 38   | 42   | 39   | 37   | 34   | 40   | 35   | 37   | 35     | 1.07 | 0.521167 | 33        | 0.82     | 0.388919 |          |          |
| 258357_at   | A13g14350 | putative leucine-rich repeat transmembrane leucine-rich repeat transmembrane prot       | 214  | 194  | 229  | 217  | 232  | 206  | 212  | 218  | 0.97     | 0.654771  | 144  | 133  | 142  | 156  | 154  | 124  | 164  | 173  | 140    | 154  | 0.91     | 0.263427  | 144      | 0.97     | 0.703150 |          |
| 258358_at   | A13g14380 | unknown protein similar to unknown or: integral membrane family protein                 | 240  | 245  | 362  | 310  | 273  | 268  | 282  | 284  | 0.99     | 0.966844  | 234  | 262  | 301  | 601  | 420  | 467  | 438  | 444  | 265    | 474  | 0.56     | 0.003906  | 496      | 0.54     | 0.016176 |          |
| 258359_s_at | A13g14415 | outative olivolate oxidase similar to olv (S)-2-hydrox-acid oxidase, peroxisoma         | 99   | 150  | 130  | 178  | 128  | 98   | 126  | 135  | 0.94     | 0.776692  | 138  | 126  | 152  | 313  | 187  | 196  | 234  | 218  | 160    | 229  | 0.70     | 0.080863  | 232      | 0.69     | 0.185722 |          |
| 258360_at   | A13g14250 | hypothetical protein predicted by gense zinc finger protein-related                     | 36   | 52   | 38   | 38   | 38   | 43   | 40   | 39   | 1.00     | 0.988038  | 23   | 197  | 42   | 52   | 25   | 21   | 22   | 27   | 26     | 28   | 24       | 1.16      | 0.024501 | 23       | 1.23     | 0.084948 |
| 258361_at   | A13g14270 | unknown protein similar to hypoethl cal phosphatidylinositol-4-phosphate 5-kin          | 180  | 212  | 227  | 249  | 262  | 210  | 208  | 240  | 0.86     | 0.182809  | 242  | 316  | 288  | 349  | 311  | 342  | 362  | 348  | 311    | 369  | 0.82     | 0.884184  | 283      | 1.00     | 0.316602 |          |
| 258362_at   | A13g14280 | unknown protein : expressed protein                                                     | 18   | 19   | 31   | 12   | 12   | 12   | 15   | 22   | 1.3      | 0.100704  | 22   | 28   | 18   | 36   | 31   | 24   | 35   | 40   | 23     | 33   | 0.69     | 0.044546  | 30       | 0.75     | 0.163980 |          |
| 258363_at   | A13g14300 | putative pectin methyltransferase similar t pectinesterase family protein               | 46   | 57   | 61   | 38   | 40   | 44   | 55   | 41   | 1.34     | 0.042799  | 22   | 20   | 29   | 27   | 23   | 21   | 24   | 28   | 24     | 24   | 0.97     | 0.786130  | 23       | 1.01     | 0.937900 |          |
| 258364_at   | A13g14225 | GDSL-motif flossidase/hydrolase family prot                                             | 29   | 31   | 42   | 34   | 34   | 35   | 34   | 34   | 1.00     | 0.988890  | 25   | 34   | 29   | 26   | 21   | 21   | 24   | 26   | 27     | 29   | 25       | 1.17      | 0.109186 | 24       | 1.23     | 0.138373 |
| 258365_s_at | A13g14390 | outative diaminoimide decarboxylase (diaminoimide decarboxylase, outative               | 816  | 980  | 990  | 1176 | 1041 | 923  | 1173 | 0.73 | 0.100428 | 990       | 1032 | 1039 | 1268 | 1032 | 1039 | 1268 | 1032 | 1039 | 1268   | 1032 | 0.76     | 0.011519  | 1227     | 0.76     | 0.061614 |          |
| 258366_at   | A13g14230 | DNA-binding protein contains AP2 dom AP2 domain-contains protein RAP2.2                 | 397  | 555  | 483  | 644  | 690  | 544  | 478  | 626  | 0        |           |      |      |      |      |      |      |      |      |        |      |          |           |          |          |          |          |

|             |           |                                                                                     |      |      |      |      |      |      |      |      |      |          |      |      |      |      |      |      |      |      |      |      |          |          |      |          |          |
|-------------|-----------|-------------------------------------------------------------------------------------|------|------|------|------|------|------|------|------|------|----------|------|------|------|------|------|------|------|------|------|------|----------|----------|------|----------|----------|
| 258291_at   | A13g23310 | putative protein kinase similar to czeir protein kinase, putative                   | 132  | 164  | 154  | 200  | 211  | 151  | 150  | 187  | 0.80 | 0.151616 | 103  | 88   | 108  | 151  | 128  | 101  | 125  | 122  | 100  | 125  | 0.79     | 0.068550 | 127  | 0.79     | 0.162137 |
| 258292_at   | A13g23330 | hyothetical protein predicted by oener pentatricopeptide (PPR) repeat-containi      | 72   | 97   | 119  | 124  | 140  | 109  | 96   | 124  | 0.77 | 0.159475 | 84   | 75   | 90   | 109  | 80   | 85   | 92   | 85   | 83   | 90   | 0.92     | 0.348979 | 91   | 0.91     | 0.433321 |
| 258293_at   | A13g23430 | unknown protein                                                                     | 94   | 125  | 130  | 89   | 88   | 76   | 116  | 84   | 1.38 | 0.058737 | 68   | 64   | 77   | 85   | 74   | 65   | 76   | 71   | 70   | 74   | 0.84     | 0.046981 | 75   | 0.93     | 0.506835 |
| 258294_at   | A13g23450 | hyothetical protein predicted by oener hydrophobic                                  | 14   | 10   | 15   | 15   | 11   | 11   | 14   | 14   | 0.69 | 0.300359 | 11   | 11   | 12   | 11   | 12   | 11   | 12   | 13   | 11   | 13   | 0.92     | 0.159323 | 11   | 13       | 0.169075 |
| 258295_at   | A13g23400 | unknown protein - supported by full-len plastid-oid associated protein PAP / fibr   | 157  | 188  | 247  | 323  | 304  | 231  | 197  | 286  | 0.69 | 0.082873 | 210  | 255  | 238  | 340  | 259  | 236  | 282  | 275  | 235  | 279  | 0.84     | 0.127057 | 278  | 0.84     | 0.259533 |
| 258296_at   | A13g23390 | putative ribosomal protein similar to rib 60S ribosomal protein L36a/L44 (RPL36     | 2189 | 2591 | 2651 | 2766 | 2899 | 2627 | 2477 | 2764 | 0.90 | 0.156887 | 2380 | 2460 | 2592 | 3155 | 2555 | 2422 | 2628 | 2586 | 2477 | 2699 | 0.93     | 0.312907 | 2711 | 0.91     | 0.373455 |
| 258297_at   | A13g23325 | Expressed protein ; supported by full-se splicing factor, putative                  | 472  | 598  | 678  | 672  | 677  | 615  | 583  | 654  | 0.89 | 0.317886 | 564  | 695  | 680  | 970  | 653  | 628  | 775  | 715  | 646  | 748  | 0.86     | 0.286095 | 750  | 0.86     | 0.427049 |
| 258298_at   | A13g23360 | unknown protein - supported by cDNA: expressed protein-related                      | 241  | 232  | 246  | 242  | 241  | 252  | 213  | 245  | 0.80 | 0.14463  | 178  | 262  | 249  | 246  | 229  | 190  | 264  | 207  | 193  | 284  | 0.84     | 0.126104 | 223  | 0.82     | 0.366075 |
| 258299_at   | A13g23410 | unknown protein contains GMC oxidoreductase-like oxidase-related                    | 1349 | 1265 | 1286 | 1096 | 1161 | 922  | 1300 | 1050 | 1.23 | 0.030499 | 1094 | 863  | 1077 | 1466 | 1245 | 1026 | 1470 | 1378 | 1012 | 1317 | 0.77     | 0.048485 | 1246 | 0.81     | 0.186481 |
| 258300_at   | A13g23340 | outative casein kinase I similar to casei casein kinase, putative                   | 15   | 14   | 21   | 28   | 27   | 22   | 17   | 26   | 0.66 | 0.035818 | 14   | 12   | 14   | 26   | 23   | 22   | 18   | 20   | 14   | 20   | 0.62     | 0.003881 | 24   | 0.57     | 0.001224 |
| 258301_at   | A13g30510 | hyothetical protein predicted by oener hyothetical protein                          | 10   | 15   | 15   | 11   | 14   | 12   | 14   | 12   | 1.11 | 0.506620 | 8    | 11   | 11   | 9    | 8    | 7    | 8    | 10   | 10   | 8    | 1.17     | 0.217509 | 8    | 1.26     | 0.157955 |
| 258302_at   | A13g30610 | hyothetical protein predicted by oener hyothetical protein                          | 12   | 10   | 16   | 11   | 16   | 17   | 14   | 17   | 0.82 | 0.380135 | 8    | 15   | 13   | 14   | 10   | 14   | 15   | 12   | 12   | 13   | 0.92     | 0.621514 | 13   | 0.93     | 0.766607 |
| 258303_at   | A13g30620 | hyothetical protein predicted by oener dyox-like retrotransposon family (Althia     | 15   | 17   | 18   | 19   | 27   | 20   | 17   | 22   | 0.75 | 0.082014 | 15   | 14   | 16   | 17   | 13   | 16   | 15   | 14   | 15   | 15   | 1.00     | 0.846126 | 15   | 1.00     | 0.963064 |
| 258304_at   | A13g30640 | hyothetical protein predicted by oener Ulp1 protease family protein                 | 12   | 14   | 16   | 13   | 16   | 16   | 14   | 15   | 0.90 | 0.411344 | 11   | 9    | 13   | 14   | 11   | 13   | 14   | 10   | 11   | 12   | 0.89     | 0.357851 | 13   | 0.87     | 0.313805 |
| 258305_at   | A13g30650 | hyothetical protein predicted by oense expressed protein                            | 12   | 10   | 12   | 8    | 11   | 15   | 11   | 11   | 1.00 | 0.996547 | 7    | 9    | 10   | 7    | 10   | 10   | 11   | 10   | 9    | 10   | 0.91     | 0.479382 | 9    | 0.97     | 0.846411 |
| 258306_at   | A13g30530 | outative transfection factor similar to G ZIP transcription factor family protein   | 18   | 26   | 26   | 28   | 26   | 22   | 24   | 25   | 0.94 | 0.687845 | 13   | 19   | 23   | 21   | 16   | 15   | 22   | 14   | 19   | 17   | 1.06     | 0.176942 | 17   | 1.09     | 0.685117 |
| 258307_x_at | A13g30560 | hyothetical protein predicted by oense pseudogene, similar to outative helicase     | 21   | 22   | 27   | 23   | 30   | 32   | 23   | 29   | 0.81 | 0.180519 | 14   | 12   | 17   | 17   | 12   | 15   | 14   | 15   | 14   | 15   | 0.94     | 0.597231 | 15   | 0.97     | 0.860145 |
| 258308_at   | A13g30570 | outative reverse transcriptase similar to non-LTR retrotransposon family (LINE)     | 50   | 57   | 71   | 64   | 72   | 61   | 59   | 66   | 0.90 | 0.391427 | 35   | 45   | 49   | 45   | 43   | 48   | 49   | 47   | 43   | 47   | 0.92     | 0.325603 | 45   | 0.95     | 0.608640 |
| 258309_at   | A13g30585 | putative transposase related to rater 1.01-1.01 transposase family III Mutat        | 24   | 23   | 27   | 26   | 30   | 25   | 25   | 27   | 0.91 | 0.291303 | 17   | 17   | 24   | 22   | 22   | 16   | 17   | 18   | 19   | 19   | 1.01     | 0.940744 | 20   | 0.96     | 0.786447 |
| 258310_at   | A13g27444 | unknown protein                                                                     | 991  | 1347 | 1449 | 1311 | 1455 | 1065 | 1262 | 1277 | 0.99 | 0.940155 | 1468 | 1179 | 1238 | 1605 | 1378 | 1291 | 1637 | 1538 | 1295 | 1490 | 0.87     | 0.126817 | 1425 | 0.91     | 0.370713 |
| 258311_at   | A13g26810 | transport inhibitor response 1 (TR1) c transport inhibitor response protein, puts   | 276  | 432  | 313  | 494  | 466  | 334  | 340  | 431  | 0.79 | 0.253596 | 323  | 266  | 288  | 467  | 383  | 345  | 393  | 372  | 292  | 392  | 0.75     | 0.015490 | 398  | 0.73     | 0.056051 |
| 258277_at   | A13g26830 | outative cytochrome P450 similar to cvl cytochrome P450 71B15, outative CYP         | 19   | 22   | 29   | 27   | 22   | 24   | 23   | 24   | 0.95 | 0.758890 | 17   | 15   | 22   | 19   | 18   | 16   | 22   | 22   | 18   | 19   | 0.95     | 0.691899 | 18   | 1.04     | 0.767456 |
| 258278_at   | A13g26860 | outative self-incomatibility protein sim self-incomatibility protein-related        | 22   | 17   | 26   | 16   | 18   | 18   | 22   | 18   | 1.22 | 0.202060 | 12   | 10   | 11   | 7    | 5    | 7    | 8    | 6    | 11   | 7    | 1.66     | 0.000404 | 6    | 1.75     | 0.001638 |
| 258279_at   | A13g26870 | outative self-incomatibility protein sim self-incomatibility protein-related        | 6    | 6    | 13   | 7    | 8    | 7    | 8    | 7    | 1.13 | 0.658315 | 6    | 7    | 6    | 3    | 3    | 8    | 6    | 6    | 6    | 5    | 1.17     | 0.488164 | 5    | 1.29     | 0.407980 |
| 258280_at   | A13g26880 | putative self-incomatibility protein sim self-incomatibility protein-related        | 13   | 11   | 17   | 14   | 17   | 16   | 14   | 16   | 0.88 | 0.349657 | 11   | 14   | 15   | 8    | 10   | 11   | 14   | 15   | 14   | 12   | 1.16     | 0.370318 | 10   | 1.38     | 0.090367 |
| 258281_at   | A13g26900 | putative shikimate kinase similar to shi shikimate kinase family protein            | 151  | 237  | 296  | 200  | 244  | 190  | 228  | 211  | 1.08 | 0.731439 | 177  | 218  | 174  | 251  | 180  | 202  | 221  | 232  | 190  | 217  | 0.87     | 0.198700 | 211  | 0.90     | 0.441702 |
| 258282_at   | A13g26910 | unknown protein                                                                     | 107  | 120  | 133  | 118  | 139  | 101  | 120  | 119  | 1.01 | 0.958294 | 95   | 87   | 131  | 110  | 110  | 119  | 119  | 104  | 110  | 0.95 | 0.675780 | 103      | 1.01 | 0.946841 |          |
| 258283_at   | A13g26750 | hyothetical protein predicted by oener expressed protein                            | 126  | 144  | 153  | 175  | 176  | 153  | 141  | 168  | 0.84 | 0.068517 | 119  | 106  | 128  | 161  | 142  | 125  | 144  | 141  | 118  | 143  | 0.83     | 0.030502 | 143  | 0.83     | 0.107590 |
| 258253_at   | A13g26760 | outative short chain alcohol dehydrocose short-chain dehydrogenase/reductase (E     | 31   | 43   | 41   | 29   | 41   | 36   | 38   | 35   | 1.09 | 0.550280 | 31   | 34   | 30   | 34   | 31   | 30   | 31   | 30   | 32   | 31   | 1.02     | 0.721751 | 32   | 1.00     | 0.996466 |
| 258254_at   | A13g26760 | unknown protein contains Pfam profile: chondroitinase/alkalishosphatase             | 71   | 63   | 89   | 108  | 114  | 88   | 93   | 107  | 0.85 | 0.320213 | 77   | 65   | 77   | 83   | 68   | 77   | 83   | 77   | 79   | 82   | 0.81     | 0.043559 | 81   | 0.82     | 0.065651 |
| 258255_at   | A13g26800 | unknown protein - supported by cDNA: expressed protein                              | 180  | 264  | 272  | 245  | 284  | 229  | 239  | 252  | 0.95 | 0.701823 | 280  | 297  | 331  | 411  | 303  | 279  | 391  | 373  | 302  | 352  | 0.86     | 0.219241 | 331  | 0.91     | 0.541719 |
| 258256_at   | A13g26890 | unknown protein ; supported by cDNA: expressed protein                              | 315  | 497  | 496  | 501  | 672  | 434  | 436  | 536  | 0.81 | 0.346154 | 266  | 259  | 298  | 368  | 351  | 317  | 346  | 346  | 274  | 346  | 0.79     | 0.002275 | 345  | 0.80     | 0.021091 |
| 258257_at   | A13g26770 | putative short chain alcohol dehydrocose short-chain dehydrogenase/reductase (E     | 25   | 27   | 35   | 43   | 29   | 30   | 29   | 30   | 0.86 | 0.047582 | 21   | 21   | 20   | 19   | 20   | 23   | 23   | 21   | 21   | 21   | 0.97     | 0.645895 | 21   | 1.00     | 0.990363 |
| 258258_at   | A13g26790 | transcriptional reulator (FUSCA3) ide transcriptional regular (FUSCA3)              | 33   | 45   | 28   | 52   | 47   | 38   | 44   | 46   | 0.96 | 0.821373 | 40   | 49   | 51   | 47   | 43   | 48   | 43   | 39   | 47   | 43   | 1.08     | 0.402084 | 42   | 1.12     | 0.324978 |
| 258259_s_at | A13g26840 | unknown protein ; supported by cDNA: esterase/lipase/thioesterase family crote      | 24   | 34   | 36   | 80   | 78   | 54   | 31   | 71   | 0.44 | 0.011717 | 28   | 32   | 36   | 75   | 73   | 63   | 78   | 65   | 32   | 71   | 0.45     | 0.000101 | 70   | 0.45     | 0.000889 |
| 258260_at   | A13g26850 | unknown protein ; supported by cDNA: expressed protein                              | 88   | 109  | 98   | 145  | 125  | 103  | 98   | 125  | 0.79 | 0.012631 | 112  | 99   | 113  | 176  | 139  | 127  | 141  | 128  | 108  | 142  | 0.76     | 0.031555 | 148  | 0.73     | 0.061238 |
| 258261_at   | A13g15740 | putative RING zinc finger protein conta zinc finger (C3H4C-type RING finger) fa     | 49   | 65   | 77   | 39   | 41   | 51   | 60   | 44   | 1.37 | 0.154126 | 46   | 66   | 62   | 42   | 36   | 36   | 43   | 45   | 58   | 40   | 1.44     | 0.013896 | 38   | 1.53     | 0.035284 |
| 258262_at   | A13g15770 | hyothetical protein                                                                 | 78   | 92   | 112  | 108  | 118  | 96   | 84   | 105  | 0.89 | 0.426414 | 96   | 112  | 88   | 102  | 96   | 86   | 122  | 112  | 97   | 104  | 0.85     | 0.019187 | 95   | 0.94     | 0.710277 |
| 258263_at   | A13g15780 | unknown protein                                                                     | 96   | 144  | 183  | 151  | 191  | 126  | 141  | 156  | 0.90 | 0.648096 | 111  | 129  | 120  | 163  | 140  | 132  | 162  | 152  | 120  | 150  | 0.80     | 0.016135 | 145  | 0.83     | 0.080141 |
| 258264_at   | A13g15790 | unknown protein                                                                     | 388  | 533  | 635  | 736  | 852  | 683  | 519  | 757  | 0.69 | 0.052661 | 552  | 661  | 672  | 980  | 827  | 820  | 760  | 741  | 628  | 826  | 0.76     | 0.019767 | 876  | 0.72     | 0.018726 |
| 258265_at   | A13g15800 | outative beta-1,3-glucanase precursor glycosyl hydrolase family 17 protein          | 51   | 65   | 65   | 84   | 92   | 84   | 60   | 87   | 0.69 | 0.006465 | 59   | 58   | 65   | 83   | 66   | 81   | 89   | 76   | 60   | 75   | 0.81     | 0.090423 | 70   | 0.87     | 0.257128 |
| 258266_at   | A13g15860 | hyothetical protein predicted by oener hydrophobic                                  | 53   | 24   | 26   | 26   | 24   | 26   | 24   | 25   | 0.95 | 0.248325 | 23   | 21   | 25   | 22   | 20   | 16   | 23   | 19   | 12   | 0.92 | 0.030486 | 19       | 1.19 | 0.153744 |          |
| 258267_at   | A13g15870 | putative delta 9 desaturase similar to di fatty acid desaturase family protein      | 23   | 28   | 28   | 25   | 31   | 21   | 28   | 29   | 1.12 | 0.396280 | 24   | 28   | 28   | 28   | 28   | 28   | 28   | 28   | 28   | 28   | 1.18     | 0.134317 | 28   | 1.02     | 0.065731 |
| 258268_at   | A13g15880 | putative WD-repeat protein contains Pti WD-40 repeat family protein                 | 534  | 610  | 674  | 728  | 788  | 629  | 606  | 715  | 0.85 | 0.151445 | 548  | 485  | 600  | 798  | 644  | 498  | 649  | 634  | 544  | 645  | 0.84     | 0.189127 | 647  | 0.84     | 0.331274 |
| 258269_at   | A13g15690 | putative acetyl-CoA carboxylase biotin- biotin carboxyl carrier protein of acetyl-C | 110  | 141  | 128  | 161  | 161  | 133  | 126  | 152  | 0.83 | 0.119292 | 156  | 167  | 166  | 244  | 206  | 185  | 202  | 179  | 163  | 203  | 0.80     | 0.039835 | 212  | 0.77     | 0.049396 |
| 258270_at   | A13g15650 | outative hydroxosholioside similar to ix hydroxosholioside/carboxylesterase family  | 40   | 53   | 57   | 64   | 64   | 71   | 50   | 66   | 0.75 | 0.048176 | 35   | 39   | 45   | 56   | 42   | 46   | 51   | 51   | 40   | 49   | 0.81     | 0.048916 | 48   | 0.83     | 0.179530 |
| 258271_at   | A13g15660 | hyothetical protein predicted by oener hyothetical protein                          | 79   | 101  | 80   | 102  | 87   | 102  | 85   | 92   | 0.85 | 0.210650 | 81   | 72   | 67   | 64   | 68   | 112  | 89   | 81   | 81   | 92   | 0.87     | 0.010038 | 97   | 0.70     | 0.035684 |
| 258272_at   | A13g15610 | unknown protein similar to serine/thre transducin family protein / WD-40 repeat     | 427  | 592  | 637  | 620  | 739  | 495  | 552  | 618  | 0.89 | 0.527844 | 623  | 376  | 391  | 594  | 513  | 474  | 589  | 570  | 397  | 548  | 0.72     | 0.003737 | 527  | 0.75     | 0.026884 |
| 258273_at   | A13g15660 | unknown protein - supported by                                                      |      |      |      |      |      |      |      |      |      |          |      |      |      |      |      |      |      |      |      |      |          |          |      |          |          |

|         |           |                                                                                       |      |      |      |      |      |      |      |      |          |          |      |      |      |      |      |      |      |      |      |      |          |          |      |          |          |
|---------|-----------|---------------------------------------------------------------------------------------|------|------|------|------|------|------|------|------|----------|----------|------|------|------|------|------|------|------|------|------|------|----------|----------|------|----------|----------|
| 25820a1 | At3g13970 | hypothetical protein predicted by gene expressed protein                              | 85   | 270  | 280  | 302  | 319  | 243  | 272  | 288  | 0.94     | 0.526488 | 242  | 243  | 255  | 370  | 301  | 275  | 268  | 279  | 247  | 298  | 0.83     | 0.085356 | 315  | 0.78     | 0.074933 |
| 25820a2 | At3g13970 | unknown protein                                                                       | 83   | 98   | 110  | 111  | 123  | 83   | 97   | 106  | 0.92     | 0.569636 | 97   | 88   | 96   | 111  | 84   | 124  | 123  | 97   | 94   | 108  | 0.87     | 0.237509 | 106  | 0.88     | 0.367200 |
| 25820a6 | At3g14010 | hypothetical protein predicted by gene expressed protein                              | 361  | 471  | 492  | 455  | 529  | 417  | 442  | 467  | 0.95     | 0.652051 | 334  | 288  | 337  | 338  | 298  | 368  | 367  | 319  | 356  | 0.90 | 0.203797 | 342      | 0.93 | 0.508168 |          |
| 25820a7 | At3g14010 | putative GTP-provosthase kinase similar to RhoA/GTPase protein, putative (RS42)       | 121  | 166  | 225  | 206  | 166  | 175  | 172  | 199  | 0.87     | 0.438225 | 110  | 118  | 121  | 135  | 129  | 108  | 156  | 140  | 116  | 134  | 0.87     | 0.120540 | 124  | 0.94     | 0.413654 |
| 25820a8 | At3g13970 | putative acetyltransferase similar to 5-acetyltransferase, c                          | 472  | 540  | 568  | 503  | 568  | 508  | 542  | 538  | 0.92     | 0.569636 | 442  | 358  | 442  | 417  | 432  | 391  | 352  | 391  | 442  | 372  | 0.91     | 0.156475 | 444  | 0.91     | 0.564475 |
| 25820a9 | At3g14060 | expressed protein supported by cDNA: expressed protein                                | 20   | 20   | 30   | 27   | 35   | 19   | 23   | 27   | 0.86     | 0.521324 | 18   | 19   | 24   | 22   | 18   | 23   | 26   | 21   | 21   | 22   | 0.93     | 0.406255 | 21   | 0.98     | 0.837328 |
| 258210  | At3g13920 | Eukaryotic initiation factor 4A, putative eukaryotic translation initiation factor 4A | 1926 | 2085 | 2097 | 2290 | 2449 | 2064 | 2038 | 2268 | 0.90     | 0.135542 | 1639 | 1564 | 1760 | 2349 | 1876 | 1770 | 1917 | 1922 | 1655 | 1967 | 0.84     | 0.065720 | 1999 | 0.83     | 0.139650 |
| 258211  | At3g17880 | hypothetical protein predicted by gene expressed protein                              | 68   | 68   | 71   | 75   | 79   | 67   | 65   | 74   | 0.88     | 0.232234 | 71   | 70   | 68   | 113  | 86   | 87   | 90   | 84   | 70   | 92   | 0.76     | 0.202145 | 95   | 0.73     | 0.046028 |
| 258212  | At3g17880 | unknown protein contains Pfam profile: leucine-rich repeat family protein             | 103  | 116  | 128  | 114  | 134  | 107  | 107  | 118  | 0.98     | 0.368135 | 107  | 100  | 97   | 137  | 112  | 98   | 135  | 116  | 102  | 96   | 0.93     | 0.181651 | 118  | 0.91     | 0.395952 |
| 258213  | At3g17880 | hypothetical protein predicted by gene expressed protein                              | 58   | 62   | 72   | 76   | 76   | 67   | 63   | 0.93 | 0.037617 | 71       | 68   | 63   | 103  | 79   | 51   | 79   | 72   | 66   | 79   | 68   | 0.84     | 0.205462 | 86   | 0.77     | 0.080896 |
| 258214  | At3g17970 | amidase, putative similar to amidase C chorloast outer membrane translocan            | 37   | 43   | 51   | 50   | 62   | 53   | 44   | 55   | 0.79     | 0.101990 | 27   | 34   | 32   | 42   | 36   | 38   | 38   | 31   | 38   | 38   | 0.83     | 0.036309 | 37   | 0.83     | 0.131990 |
| 258215  | At3g17970 | phosphochlorine phosphatase, putative chlorolact outer membrane translocan            | 86   | 105  | 103  | 100  | 106  | 104  | 98   | 103  | 0.95     | 0.479494 | 94   | 87   | 101  | 105  | 92   | 82   | 113  | 87   | 94   | 96   | 0.98     | 0.079804 | 93   | 1.01     | 0.942249 |
| 258216  | At3g17970 | unknown protein contains Pfam profile: C2 domain-containing protein                   | 45   | 41   | 49   | 45   | 45   | 35   | 45   | 45   | 0.99     | 0.975677 | 32   | 36   | 34   | 32   | 29   | 21   | 32   | 38   | 29   | 34   | 1.28     | 0.207691 | 27   | 1.24     | 0.136722 |
| 258217  | At3g17970 | unknown protein contains Pfam profile: phosphochlorine phosphatase                    | 87   | 103  | 128  | 131  | 131  | 107  | 103  | 122  | 0.95     | 0.037617 | 102  | 102  | 102  | 102  | 102  | 110  | 110  | 110  | 110  | 110  | 1.24     | 0.207691 | 110  | 1.24     | 0.207691 |
| 258218  | At3g18000 | methyltransferase, putative similar to n-phosphothalamic-N-methyltransferase          | 90   | 156  | 128  | 136  | 136  | 125  | 200  | 0.62 | 0.051515 | 199      | 165  | 223  | 290  | 229  | 189  | 297  | 266  | 259  | 276  | 0.67 | 0.088798 | 236      | 0.83 | 0.302061 |          |
| 258219  | At3g17880 | thioredoxin, putative similar to THORE thiolactonidase (TDX)                          | 170  | 219  | 228  | 247  | 271  | 224  | 206  | 247  | 0.83     | 0.142741 | 224  | 223  | 229  | 324  | 247  | 236  | 259  | 244  | 225  | 262  | 0.86     | 0.134776 | 269  | 0.84     | 0.190934 |
| 258220  | At3g17880 | DnaJ, putative similar to DnaJ GBAF DnaJ heat shock family protein                    | 59   | 76   | 77   | 87   | 104  | 84   | 71   | 92   | 0.77     | 0.072242 | 56   | 48   | 62   | 63   | 67   | 63   | 62   | 67   | 65   | 69   | 0.81     | 0.059470 | 71   | 0.78     | 0.059470 |
| 25818   | At3g17880 | protein kinase, putative similar to protein kinase, putative                          | 516  | 61   | 74   | 65   | 65   | 62   | 716  | 865  | 0.99     | 0.205689 | 344  | 298  | 347  | 328  | 344  | 328  | 344  | 328  | 344  | 328  | 0.99     | 0.048234 | 344  | 0.99     | 0.125456 |
| 258187  | At3g17870 | HSC70-interacting protein, putative sin letrateducin (TDX)                            | 80   | 119  | 106  | 155  | 127  | 109  | 102  | 145  | 0.70     | 0.117329 | 130  | 170  | 128  | 210  | 156  | 157  | 132  | 138  | 142  | 159  | 0.90     | 0.465689 | 174  | 0.82     | 0.227844 |
| 258188  | At3g17800 | unknown protein: supported by full-len expressed protein                              | 338  | 456  | 460  | 440  | 475  | 345  | 418  | 420  | 1.00     | 0.977155 | 270  | 308  | 310  | 417  | 320  | 290  | 350  | 338  | 296  | 343  | 0.86     | 0.164887 | 342  | 0.86     | 0.312455 |
| 258189  | At3g17800 | unknown protein: supported by full-len expressed protein                              | 50   | 61   | 74   | 74   | 90   | 100  | 85   | 69   | 0.92     | 0.023642 | 55   | 62   | 66   | 76   | 73   | 70   | 79   | 67   | 61   | 73   | 0.84     | 0.019802 | 73   | 0.84     | 0.030383 |
| 258185  | At3g17790 | acid phosphatase, type 5 identical to Gc acid phosphatase type 5 (ACPS)               | 66   | 75   | 61   | 74   | 90   | 100  | 85   | 61   | 0.91     | 0.791677 | 67   | 74   | 69   | 75   | 73   | 61   | 75   | 69   | 61   | 73   | 0.84     | 0.019802 | 73   | 0.84     | 0.030383 |
| 258186  | At3g17790 | receptor kinase, putative similar to leucine-rich repeat transmembrane kinase         | 550  | 726  | 645  | 791  | 912  | 748  | 640  | 819  | 0.78     | 0.062590 | 546  | 419  | 510  | 719  | 637  | 500  | 627  | 590  | 496  | 615  | 0.81     | 0.077747 | 619  | 0.80     | 0.173249 |
| 258180  | At3g17820 | glutamine synthetase, putative similar to glutamine synthetase (GS1)                  | 272  | 902  | 834  | 725  | 924  | 635  | 813  | 761  | 0.77     | 0.044841 | 769  | 801  | 704  | 767  | 616  | 567  | 708  | 659  | 758  | 663  | 1.14     | 0.112545 | 650  | 1.17     | 0.180745 |
| 258179  | At3g17830 | hypothetical protein predicted by gene expressed protein                              | 706  | 407  | 463  | 425  | 481  | 392  | 382  | 432  | 0.88     | 0.435363 | 399  | 415  | 431  | 550  | 450  | 443  | 461  | 457  | 415  | 472  | 0.88     | 0.078962 | 481  | 0.86     | 0.139336 |
| 258162  | At3g17810 | dehydrogenase, putative similar to dihydrodichloro dehydrogenase family pr            | 255  | 171  | 186  | 215  | 240  | 160  | 161  | 205  | 0.77     | 0.212242 | 187  | 190  | 146  | 244  | 244  | 215  | 193  | 204  | 208  | 180  | 0.85     | 0.049481 | 217  | 0.85     | 0.081777 |
| 258161  | At3g17800 | aldose 1-epimerase, putative similar to 1-epimerase 1-epimerase                       | 545  | 623  | 674  | 688  | 688  | 688  | 688  | 688  | 0.77     | 0.117329 | 837  | 776  | 1113 | 837  | 837  | 837  | 837  | 837  | 837  | 837  | 0.83     | 0.048234 | 837  | 0.83     | 0.048234 |
| 258164  | At3g17910 | surfact 1 identical to GBAF-19609 from surfact 1 (SURF1)                              | 149  | 184  | 161  | 238  | 168  | 167  | 214  | 0.78 | 0.057203 | 175      | 169  | 182  | 250  | 204  | 181  | 195  | 197  | 175  | 205  | 0.85 | 0.109642 | 211      | 0.83 | 0.156927 |          |
| 258165  | At3g17900 | unknown protein: supported by cDNA: expressed protein                                 | 205  | 251  | 258  | 284  | 290  | 245  | 238  | 273  | 0.87     | 0.185387 | 187  | 181  | 228  | 299  | 232  | 182  | 230  | 230  | 199  | 233  | 0.86     | 0.221946 | 234  | 0.85     | 0.059523 |
| 258166  | At3g21540 | WD-repeat protein, putative contains F transducin family protein / WD-40 repeat       | 137  | 152  | 148  | 171  | 164  | 137  | 146  | 157  | 0.93     | 0.367263 | 122  | 108  | 131  | 145  | 127  | 112  | 134  | 122  | 133  | 0.92 | 0.132390 | 128      | 0.95 | 0.359104 |          |
| 258167  | At3g21540 | UDP-glucose 3-acetate transferase, putative similar to UDP-glucose 3-acetate          | 456  | 462  | 462  | 462  | 462  | 462  | 462  | 462  | 0.92     | 0.117329 | 462  | 462  | 462  | 462  | 462  | 462  | 462  | 462  | 462  | 462  | 0.92     | 0.117329 | 462  | 0.92     | 0.117329 |
| 258168  | At3g21570 | hypothetical protein predicted by gene expressed protein                              | 34   | 28   | 35   | 30   | 33   | 29   | 31   | 1.02 | 0.809793 | 21       | 30   | 29   | 24   | 21   | 23   | 22   | 20   | 27   | 22   | 22   | 1.02     | 0.067716 | 23   | 1.18     | 0.218927 |
| 258169  | At3g21590 | hypothetical protein                                                                  | 14   | 15   | 17   | 17   | 15   | 20   | 15   | 18   | 0.86     | 0.245433 | 10   | 14   | 12   | 13   | 10   | 12   | 12   | 12   | 12   | 12   | 1.02     | 0.867460 | 12   | 1.03     | 0.808196 |
| 258170  | At3g21600 | unknown protein similar to senescence/senescence/dehydration-associated or            | 50   | 60   | 64   | 83   | 104  | 79   | 58   | 89   | 0.96     | 0.024916 | 61   | 64   | 60   | 102  | 88   | 86   | 93   | 62   | 91   | 0.68 | 0.000373 | 92       | 0.67 | 0.003989 |          |
| 258171  | At3g21610 | unknown protein                                                                       | 347  | 407  | 447  | 534  | 104  | 408  | 408  | 408  | 0.92     | 0.058670 | 508  | 426  | 464  | 634  | 634  | 634  | 634  | 634  | 634  | 634  | 0.92     | 0.058670 | 634  | 0.92     | 0.058670 |
| 258172  | At3g21620 | unknown protein similar to HYP1 GBC, c-type hemoglobin to dehydratation protein       | 55   | 67   | 67   | 74   | 24   | 25   | 23   | 24   | 0.69     | 0.000597 | 66   | 67   | 71   | 25   | 19   | 15   | 17   | 68   | 21   | 32   | 0.23     | 0.000031 | 21   | 0.23     | 0.000031 |
| 258173  | At3g21630 | putative protein kinase similar to serin protein kinase family protein                | 175  | 226  | 242  | 265  | 288  | 223  | 214  | 258  | 0.83     | 0.185118 | 182  | 153  | 187  | 261  | 190  | 180  | 215  | 217  | 174  | 213  | 0.82     | 0.106531 | 210  | 0.83     | 0.260668 |
| 258174  | At3g21470 | hypothetical protein contains Pfam prf pentaricocytide (PPR) repeat-containi          | 27   | 38   | 40   | 41   | 43   | 40   | 35   | 41   | 0.84     | 0.137359 | 39   | 41   | 47   | 33   | 36   | 39   | 35   | 39   | 39   | 0.90 | 0.350034 | 39       | 0.90 | 0.511298 |          |
| 258175  | At3g21640 | FKBP-type peptidyl-prolyl cis-trans is FKBP-type peptidyl-prolyl cis-trans isom       | 109  | 128  | 141  | 127  | 148  | 124  | 127  | 133  | 0.95     | 0.634052 | 146  | 140  | 127  | 163  | 146  | 134  | 144  | 152  | 148  | 165  | 0.92     | 0.048234 | 165  | 0.92     | 0.048234 |
| 258176  | At3g21650 | ubiquitin subunit of PP2A, putative similar to ubiquitin subunit of PP2A              | 28   | 263  | 283  | 283  | 283  | 283  | 283  | 283  | 0.92     | 0.117329 | 283  | 283  | 283  | 283  | 283  | 283  | 283  | 283  | 283  | 283  | 0.92     | 0.117329 | 283  | 0.92     | 0.117329 |
| 258177  | At3g21660 | ubiquitin subunit of PP2A, putative similar to ubiquitin subunit of PP2A              | 28   | 263  | 283  | 283  | 283  | 283  | 283  | 283  | 0.92     | 0.117329 | 283  | 283  | 283  | 283  | 283  | 283  | 283  | 283  | 283  | 283  | 0.92     | 0.117329 | 283  | 0.92     | 0.117329 |
| 258178  | At3g21680 | hypothetical protein predicted by gene expressed protein                              | 12   | 10   | 6    | 11   | 8    | 8    | 9    | 9    | 1.06     | 0.880498 | 12   | 9    | 8    | 11   | 12   | 7    | 12   | 13   | 10   | 11   | 0.90     | 0.546013 | 10   | 0.99     | 0.960004 |
| 258179  | At3g21690 | integral membrane protein, putative co MATE efflux family protein                     | 42   | 70   | 53   | 59   | 59   | 43   | 55   | 54   | 1.03     | 0.886338 | 17   | 18   | 25   | 34   | 20   | 18   | 27   | 22   | 20   | 24   | 0.83     | 0.374279 | 24   | 0.84     | 0.533115 |
| 258180  | At3g21700 | transcription factor, putative similar to transcription factor, putative              | 151  | 147  | 151  | 151  | 151  | 151  | 151  | 151  | 0.92     | 0.058670 | 151  | 151  | 151  | 151  | 151  | 151  | 151  | 151  | 151  | 151  | 0.92     | 0.058670 | 151  | 0.92     | 0.058670 |
| 258181  | At3g21700 | nitrate transporter identical to nitrate trntr transporter (NTP3)                     | 66   | 119  | 175  | 322  | 320  | 224  | 103  | 289  | 0.45     | 0.016055 | 58   | 52   | 84   | 227  | 177  | 138  | 156  | 146  | 65   | 169  | 0.38     | 0.003635 | 181  | 0.36     | 0.013920 |
| 258182  | At3g21650 | 1-D-deoxyxylulose 5-phosphate synthase 1-deoxy-D-xylulose 5-phosphate synthase        | 96   | 119  | 184  | 265  | 103  | 202  | 103  | 190  | 0.54     | 0.233629 | 727  | 573  | 823  | 848  | 698  | 525  | 608  | 608  | 708  | 657  | 1.08     | 0.598546 | 691  | 1.02     | 0.892789 |
| 258183  | At3g21550 | unknown protein: supported by full-len expressed protein                              | 51   | 76   | 73   | 137  | 145  | 121  | 66   | 134  | 0.49     | 0.003117 | 115  | 173  | 133  | 270  | 146  | 213  | 162  | 155  | 141  | 189  | 0.74     | 0.196117 | 120  | 0.67     | 0.155273 |
| 258184  | At3g21510 | two-component chaperonin, putative similar to chaperonin, putative                    | 34   | 51   | 41   | 49   | 49   | 49   | 49   | 49   | 0.87     | 0.032523 | 49   | 49   | 49   | 49   | 49   | 49   | 49   | 49   | 49   | 49   | 0.87     |          |      |          |          |

|             |           |                                                                                         |      |      |      |      |      |      |      |      |          |          |      |      |      |       |      |      |      |      |          |      |          |          |      |          |          |
|-------------|-----------|-----------------------------------------------------------------------------------------|------|------|------|------|------|------|------|------|----------|----------|------|------|------|-------|------|------|------|------|----------|------|----------|----------|------|----------|----------|
| 258109_at   | A13g23640 | hypothetical protein contains Pfam prof glycosyl hydrolase family 31 protein            | 323  | 440  | 433  | 460  | 490  | 361  | 399  | 437  | 0.91     | 0.520133 | 331  | 351  | 377  | 453   | 358  | 308  | 447  | 417  | 353      | 397  | 0.89     | 0.303655 | 373  | 0.95     | 0.686234 |
| 258110_at   | A13g14610 | putative cytochrome P450 similar to GE cytochrome P450, putative                        | 178  | 181  | 213  | 236  | 225  | 199  | 190  | 220  | 0.86     | 0.131091 | 185  | 197  | 191  | 244   | 191  | 166  | 241  | 242  | 191      | 217  | 0.88     | 0.275707 | 200  | 0.95     | 0.703686 |
| 258111_at   | A13g14630 | putative cytochrome P450 similar to GE cytochrome P450, putative                        | 75   | 84   | 82   | 53   | 59   | 45   | 80   | 52   | 1.54     | 0.005000 | 55   | 54   | 61   | 34    | 34   | 36   | 30   | 37   | 57       | 34   | 1.66     | 0.000056 | 35   | 1.63     | 0.000026 |
| 258112_at   | A13g14650 | putative cytochrome P450 similar to GE cytochrome P450, putative                        | 17   | 17   | 33   | 28   | 26   | 15   | 27   | 0.30 | 0.017030 | 19       | 23   | 23   | 24   | 26    | 24   | 19   | 17   | 17   | 17       | 17   | 1.00     | 0.968616 | 20   | 1.09     | 0.570506 |
| 258113_at   | A13g14650 | putative cytochrome P450 similar to GE cytochrome P450, putative /// cytochrom          | 8    | 14   | 15   | 15   | 14   | 13   | 12   | 14   | 0.90     | 0.585075 | 15   | 12   | 16   | 20    | 16   | 16   | 27   | 23   | 14       | 20   | 0.69     | 0.474382 | 17   | 0.81     | 0.160421 |
| 258114_at   | A13g14660 | putative cytochrome P450 similar to GE cytochrome P450, putative /// cytochrom          | 25   | 35   | 55   | 38   | 23   | 21   | 38   | 27   | 1.41     | 0.351344 | 39   | 52   | 47   | 49    | 36   | 35   | 99   | 97   | 46       | 63   | 0.73     | 0.340653 | 64   | 1.15     | 0.373711 |
| 258115_at   | A13g14670 | hypothetical protein predicted by genesa hypothetical protein                           | 10   | 5    | 8    | 6    | 12   | 9    | 8    | 9    | 0.83     | 0.501399 | 8    | 6    | 8    | 7     | 6    | 5    | 11   | 7    | 8        | 7    | 1.06     | 0.798173 | 6    | 1.29     | 0.131973 |
| 258116_at   | A13g14680 | hypothetical protein similar to leucine z terminal synthetase family protein            | 15   | 22   | 14   | 54   | 36   | 28   | 19   | 36   | 0.49     | 0.057111 | 11   | 10   | 17   | 17    | 11   | 21   | 21   | 17   | 21       | 0.63 | 0.219232 | 14       | 0.63 | 0.046755 |          |
| 258117_at   | A13g14700 | hypothetical protein predicted by genes expressed protein                               | 13   | 17   | 26   | 23   | 28   | 20   | 18   | 24   | 0.77     | 0.284065 | 15   | 17   | 14   | 19    | 17   | 14   | 18   | 15   | 17       | 0.87 | 0.114965 | 18       | 0.83 | 0.036950 |          |
| 258118_at   | A13g14710 | unknown protein                                                                         | 32   | 44   | 51   | 56   | 55   | 45   | 43   | 52   | 0.82     | 0.226719 | 28   | 32   | 43   | 37    | 32   | 33   | 50   | 42   | 34       | 39   | 0.89     | 0.457762 | 34   | 1.01     | 0.928820 |
| 258119_at   | A13g14720 | outative MAP kinase similar to GB-AD mitogen-activated protein kinase, outativ          | 216  | 236  | 230  | 223  | 246  | 215  | 227  | 228  | 1.00     | 0.930903 | 154  | 150  | 183  | 205   | 204  | 147  | 227  | 209  | 162      | 198  | 0.82     | 0.114635 | 185  | 0.88     | 0.351800 |
| 258120_at   | A13g14730 | hypothetical protein predicted by genesa centriothecofile (PPR) repeat-containi         | 43   | 57   | 67   | 68   | 62   | 53   | 66   | 62   | 0.81     | 0.080609 | 43   | 42   | 50   | 60    | 50   | 51   | 59   | 49   | 45       | 54   | 0.53     | 0.045629 | 54   | 0.84     | 0.082795 |
| 258121_s_at | A13g14530 | putative oeranylpyrophosphate (oeranylpyrophosphate synthase                            | 34   | 45   | 40   | 58   | 54   | 38   | 40   | 50   | 0.80     | 0.247816 | 21   | 27   | 27   | 44    | 28   | 30   | 35   | 35   | 25       | 34   | 0.73     | 0.054129 | 34   | 0.74     | 0.167037 |
| 258122_at   | A13g14570 | hypothetical protein contains similarly I glycosyl transferase family 48 protein        | 320  | 436  | 454  | 522  | 613  | 463  | 403  | 533  | 0.76     | 0.096275 | 250  | 223  | 281  | 387   | 321  | 265  | 363  | 334  | 251      | 334  | 0.75     | 0.034556 | 324  | 0.78     | 0.136258 |
| 258088_at   | A13g14580 | hypothetical protein predicted by genesa hypothetical protein predicted by genesa       | 49   | 50   | 70   | 67   | 74   | 63   | 56   | 68   | 0.83     | 0.205241 | 29   | 22   | 27   | 34    | 27   | 32   | 29   | 28   | 26       | 30   | 0.87     | 0.160833 | 31   | 0.84     | 0.190226 |
| 258089_at   | A13g14740 | hypothetical protein predicted by genesa PHD finger family protein                      | 214  | 244  | 192  | 263  | 279  | 228  | 198  | 263  | 0.77     | 0.028444 | 174  | 175  | 211  | 269   | 221  | 207  | 191  | 161  | 187      | 210  | 0.89     | 0.042819 | 232  | 0.81     | 0.113791 |
| 258090_at   | A13g14600 | putative 60S ribosomal protein L18A si 60S ribosomal protein L18A (RPL18Ac)             | 2047 | 2406 | 2870 | 2416 | 2543 | 2081 | 2374 | 2347 | 1.01     | 0.909067 | 2173 | 2495 | 2296 | 3000  | 2503 | 2428 | 2633 | 2553 | 2355     | 2624 | 0.90     | 0.124237 | 2644 | 0.89     | 0.226389 |
| 258091_at   | A13g14560 | hypothetical protein predicted by genesa expressed protein                              | 92   | 125  | 147  | 402  | 393  | 369  | 121  | 388  | 0.31     | 0.001040 | 153  | 136  | 168  | 737   | 421  | 449  | 395  | 369  | 152      | 476  | 0.32     | 0.01801  | 539  | 0.28     | 0.017615 |
| 258092_at   | A13g14595 | Expressed protein ; supported by full-length expressed protein                          | 286  | 355  | 570  | 437  | 370  | 289  | 403  | 365  | 1.10     | 0.710937 | 428  | 581  | 470  | 575   | 400  | 396  | 437  | 438  | 493      | 449  | 1.10     | 0.456385 | 457  | 1.08     | 0.655847 |
| 258093_at   | A13g14750 | unknown protein ; supported by cDNA: expressed protein                                  | 121  | 188  | 191  | 180  | 182  | 153  | 167  | 172  | 0.97     | 0.862156 | 134  | 147  | 147  | 208   | 146  | 159  | 167  | 154  | 143      | 167  | 0.86     | 0.154968 | 171  | 0.83     | 0.219013 |
| 258094_at   | A13g14690 | putative cytochrome P450 similar to GE cytochrome P450, putative /// cytochrom          | 33   | 53   | 85   | 62   | 55   | 41   | 57   | 53   | 1.08     | 0.803305 | 53   | 64   | 68   | 83    | 70   | 60   | 111  | 100  | 62       | 85   | 0.73     | 0.123217 | 71   | 0.87     | 0.310584 |
| 258095_at   | A13g14620 | putative cytochrome P450 similar to GE cytochrome P450, putative                        | 18   | 24   | 28   | 28   | 29   | 25   | 23   | 27   | 0.87     | 0.315083 | 25   | 25   | 22   | 28    | 25   | 19   | 22   | 22   | 24       | 23   | 1.03     | 0.752424 | 24   | 1.00     | 0.972342 |
| 258094_at   | A13g14680 | putative cytochrome P450 similar to GE cytochrome P450, putative                        | 19   | 26   | 27   | 24   | 29   | 25   | 24   | 26   | 0.92     | 0.512022 | 23   | 21   | 21   | 25    | 22   | 17   | 22   | 18   | 22       | 21   | 1.03     | 0.739087 | 21   | 1.01     | 0.936805 |
| 258095_at   | A13g25960 | outative pyruvate kinase similar to PFM pyruvate kinase, putative                       | 30   | 42   | 60   | 50   | 56   | 59   | 44   | 55   | 0.79     | 0.275579 | 24   | 21   | 29   | 31    | 19   | 22   | 25   | 25   | 24       | 24   | 1.00     | 0.973680 | 24   | 1.02     | 0.901559 |
| 258096_at   | A13g25970 | hypothetical protein predicted by genesa pentathecofile (PPR) repeat-containi           | 38   | 54   | 52   | 58   | 45   | 48   | 57   | 0.85 | 0.356837 | 36       | 32   | 37   | 42   | 36    | 38   | 41   | 35   | 35   | 38       | 0.80 | 0.136450 | 39       | 0.90 | 0.190805 |          |
| 258097_at   | A13g25980 | putative microtubule checkpoint protein simi mitotic spindle checkpoint protein, putati | 405  | 547  | 464  | 564  | 594  | 457  | 472  | 538  | 0.88     | 0.319343 | 435  | 401  | 463  | 547   | 497  | 467  | 373  | 362  | 433      | 449  | 0.96     | 0.754557 | 504  | 0.86     | 0.074476 |
| 258098_at   | A13g25990 | putative DNA-binding protein, GT-1 si DNA-binding protein GT-1-related                  | 30   | 70   | 76   | 58   | 92   | 62   | 61   | 77   | 0.95     | 0.795587 | 65   | 70   | 53   | 47    | 49   | 46   | 60   | 49   | 63       | 50   | 1.24     | 0.044715 | 48   | 1.31     | 0.039622 |
| 258099_at   | A13g26010 | hypothetical protein predicted by genesa F-box family protein                           | 35   | 34   | 41   | 43   | 46   | 38   | 36   | 42   | 0.86     | 0.126596 | 31   | 26   | 42   | 35    | 31   | 35   | 33   | 30   | 33       | 33   | 1.00     | 0.968573 | 34   | 0.98     | 0.907930 |
| 258099_at   | A13g26040 | hypothetical protein predicted by genesa transferase family protein                     | 35   | 42   | 46   | 38   | 40   | 36   | 41   | 38   | 1.07     | 0.465987 | 30   | 37   | 34   | 34    | 32   | 27   | 25   | 34   | 34       | 31   | 1.09     | 0.387442 | 28   | 1.20     | 0.108449 |
| 258097_s_at | A13g26020 | unknown protein ; supported by cDNA: expressed protein                                  | 252  | 369  | 383  | 549  | 518  | 478  | 371  | 478  | 0.71     | 0.047636 | 367  | 402  | 461  | 588   | 467  | 505  | 467  | 505  | 467      | 505  | 0.85     | 0.228601 | 455  | 0.87     | 0.446755 |
| 258097_at   | A13g26090 | unknown protein ; supported by cDNA: expressed protein                                  | 156  | 181  | 204  | 279  | 320  | 241  | 180  | 280  | 0.64     | 0.020101 | 224  | 185  | 207  | 306   | 291  | 226  | 354  | 320  | 205      | 299  | 0.68     | 0.017824 | 274  | 0.75     | 0.061299 |
| 258073_at   | A13g25880 | putative auxin-resistance protein, AXR auxin-resistance protein, putative               | 46   | 34   | 31   | 39   | 37   | 32   | 30   | 36   | 0.83     | 0.142676 | 22   | 25   | 23   | 28    | 23   | 22   | 26   | 23   | 23       | 24   | 0.96     | 0.487629 | 24   | 0.96     | 0.614617 |
| 258074_at   | A13g25890 | unknown protein ; supported by cDNA: expressed protein                                  | 14   | 137  | 133  | 129  | 145  | 114  | 122  | 129  | 0.94     | 0.661477 | 95   | 100  | 102  | 120   | 95   | 92   | 104  | 102  | 99       | 103  | 0.96     | 0.584223 | 102  | 0.97     | 0.711792 |
| 258075_at   | A13g26090 | homocysteine S-methyltransferase AH homocysteine S-methyltransferase 1 (H)              | 109  | 113  | 127  | 136  | 106  | 113  | 124  | 136  | 0.95     | 0.527265 | 93   | 105  | 111  | 123   | 99   | 91   | 104  | 0.92 | 0.633006 | 104  | 0.98     | 0.888636 |      |          |          |
| 258076_at   | A13g25920 | 50S ribosomal protein L15, chloroplast 50S ribosomal protein L15, chloroplast (         | 408  | 721  | 600  | 589  | 675  | 515  | 576  | 593  | 0.97     | 0.875426 | 548  | 645  | 617  | 780   | 620  | 648  | 620  | 590  | 603      | 651  | 0.93     | 0.365020 | 682  | 0.88     | 0.238373 |
| 258077_at   | A13g26110 | unknown protein ; supported by full-length expressed protein                            | 111  | 97   | 142  | 125  | 115  | 117  | 120  | 97   | 0.809716 | 58       | 58   | 86   | 68   | 69    | 49   | 63   | 79   | 60   | 67       | 64   | 1.06     | 0.694853 | 60   | 1.13     | 0.518258 |
| 258078_at   | A13g25870 | unknown protein ; supported by full-length expressed protein                            | 71   | 108  | 101  | 149  | 144  | 115  | 93   | 136  | 0.68     | 0.044840 | 121  | 99   | 98   | 200   | 158  | 154  | 185  | 142  | 106      | 168  | 0.63     | 0.006691 | 171  | 0.62     | 0.017514 |
| 258079_at   | A13g25940 | hypothetical protein predicted by genesa transcription factor S-II (TFHS) domain-c      | 183  | 169  | 184  | 221  | 183  | 157  | 200  | 0.94 | 0.406311 | 188      | 204  | 207  | 294  | 236   | 206  | 201  | 233  | 206  | 206      | 210  | 0.86     | 0.194996 | 251  | 0.82     | 0.194061 |
| 258080_at   | A13g25930 | unknown protein ; supported by full-length universal stress protein (USP) family cr     | 21   | 22   | 30   | 29   | 31   | 23   | 24   | 28   | 0.88     | 0.024149 | 21   | 23   | 27   | 33    | 21   | 22   | 31   | 29   | 24       | 27   | 0.87     | 0.379415 | 25   | 0.94     | 0.741768 |
| 258081_at   | A13g26085 | Expressed protein ; supported by full-length CAAX amino terminal protease family or     | 96   | 150  | 165  | 153  | 169  | 142  | 137  | 155  | 0.88     | 0.471160 | 139  | 166  | 164  | 202   | 150  | 158  | 167  | 167  | 156      | 169  | 0.92     | 0.376182 | 170  | 0.92     | 0.486116 |
| 258082_at   | A13g25905 | Expressed protein ; supported by full-length CLE27, putative                            | 223  | 265  | 270  | 256  | 235  | 207  | 253  | 233  | 1.09     | 0.378633 | 236  | 233  | 297  | 384   | 292  | 283  | 242  | 251  | 255      | 290  | 0.88     | 0.378007 | 320  | 0.80     | 0.167255 |
| 258083_at   | A13g25855 | Expressed protein ; supported by full-length expressed protein                          | 12   | 15   | 17   | 20   | 24   | 15   | 15   | 23   | 0.85     | 0.190181 | 18   | 23   | 19   | 33    | 24   | 23   | 26   | 24   | 26       | 24   | 0.76     | 0.070125 | 26   | 0.76     | 0.139637 |
| 258084_at   | A13g26020 | putative B regulatory subunit of protein serine/threonine protein phosphatase 2f        | 131  | 162  | 152  | 179  | 179  | 140  | 152  | 168  | 0.98     | 0.444308 | 98   | 89   | 101  | 98    | 142  | 119  | 103  | 119  | 121      | 98   | 1.07     | 0.411306 | 98   | 1.02     | 0.173310 |
| 258085_at   | A13g26100 | unknown protein ; supported by cDNA: regulator of chromosome condensation I             | 335  | 529  | 517  | 621  | 738  | 546  | 460  | 635  | 0.72     | 0.106122 | 486  | 488  | 418  | 719   | 657  | 512  | 672  | 688  | 464      | 649  | 0.71     | 0.010648 | 629  | 0.74     | 0.063505 |
| 258086_at   | A13g25860 | dihydrolipoamide S-acetyltransferase I dihydrolipoamide S-acetyltransferase (L          | 335  | 404  | 413  | 553  | 557  | 450  | 384  | 520  | 0.74     | 0.034076 | 403  | 380  | 445  | 675   | 532  | 458  | 505  | 480  | 409      | 530  | 0.77     | 0.062299 | 555  | 0.74     | 0.093015 |
| 258087_at   | A13g26060 | outative oeroxidoxin similar to peroxi peroxidoxin D, putative                          | 235  | 434  | 318  | 386  | 395  | 295  | 336  | 358  | 0.94     | 0.735983 | 443  | 424  | 448  | 540   | 403  | 428  | 505  | 503  | 438      | 476  | 0.92     | 0.318832 | 457  | 0.96     | 0.679409 |
| 258088_at   | A13g26030 | protein cholestolase 2A regulatory subunit serine/threonine protein cholestolase 2f     | 103  | 130  | 149  | 172  | 141  | 103  | 147  | 136  | 0.95     | 0.405923 | 104  | 120  | 109  | 151   | 126  | 120  | 129  | 129  | 103      | 126  | 0.82     | 0.060388 | 146  | 0.82     | 0.157033 |
| 258091_at   | A13g25910 | unknown protein ; supported by cDNA: expressed protein                                  | 473  | 677  | 720  | 668  | 732  | 571  | 640  | 657  | 0.97     | 0.871220 | 546  | 637  | 614  | 847</ |      |      |      |      |          |      |          |          |      |          |          |

|             |           |                                                                                          |      |      |      |      |      |      |      |      |          |          |          |      |      |      |      |      |      |      |      |      |          |          |          |          |          |          |
|-------------|-----------|------------------------------------------------------------------------------------------|------|------|------|------|------|------|------|------|----------|----------|----------|------|------|------|------|------|------|------|------|------|----------|----------|----------|----------|----------|----------|
| 258021_at   | A13g19380 | hypotheothical protein predicted genemur U-box domain-containing protein                 | 35   | 44   | 66   | 40   | 48   | 41   | 48   | 43   | 1.12     | 0.18886  | 48       | 40   | 34   | 39   | 35   | 31   | 52   | 42   | 41   | 40   | 1.02     | 0.895561 | 35       | 1.15     | 0.319973 |          |
| 258022_at   | A13g19460 | hypotheothical protein predicted by geneer reticulin family protein (RTNLB11)            | 250  | 326  | 335  | 362  | 420  | 281  | 304  | 354  | 0.86     | 0.358201 | 272      | 288  | 292  | 421  | 314  | 309  | 299  | 292  | 284  | 327  | 0.87     | 0.230761 | 348      | 0.82     | 0.162371 |          |
| 258023_at   | A13g19450 | cinnamyl alcohol dehydrogenase identic cinnamyl-alcohol dehydrogenase (CAD)              | 37   | 57   | 59   | 119  | 100  | 88   | 51   | 102  | 0.50     | 0.103227 | 67       | 84   | 89   | 253  | 168  | 147  | 158  | 155  | 80   | 176  | 0.46     | 0.011023 | 189      | 0.42     | 0.029712 |          |
| 258024_at   | A13g19360 | hypotheothical protein predicted by geneer zinc finger (CCHC-type) family protein        | 68   | 77   | 75   | 74   | 93   | 68   | 77   | 77   | 0.52     | 0.447544 | 71       | 71   | 66   | 67   | 95   | 65   | 70   | 70   | 70   | 70   | 0.46     | 0.303187 | 70       | 0.46     | 0.081356 |          |
| 258025_at   | A13g19480 | putative D-3-oxohexovalerate dehydro D-3-oxohexovalerate dehydrogenase. i                | 31   | 35   | 36   | 36   | 38   | 32   | 34   | 35   | 0.57     | 0.690998 | 28       | 28   | 31   | 29   | 27   | 26   | 28   | 26   | 29   | 27   | 1.06     | 0.104817 | 27       | 1.06     | 0.236659 |          |
| 258026_at   | A13g19290 | abscisic acid responsive elements-bind ARA-responsive element-binding protein            | 169  | 274  | 378  | 228  | 273  | 210  | 273  | 237  | 1.15     | 0.596839 | 210      | 254  | 216  | 305  | 244  | 209  | 230  | 227  | 227  | 243  | 0.93     | 0.523204 | 253      | 0.90     | 0.451517 |          |
| 258027_at   | A13g19515 | hypotheothical protein predicted by geneer expressed protein                             | 54   | 68   | 61   | 66   | 76   | 57   | 61   | 67   | 0.92     | 0.470093 | 46       | 41   | 45   | 62   | 54   | 40   | 56   | 51   | 44   | 52   | 0.84     | 0.137051 | 52       | 0.84     | 0.291027 |          |
| 258028_at   | A13g27472 | hypotheothical protein similar to Na-DAMAG leucine-rich repeat family protein            | 107  | 137  | 141  | 140  | 169  | 140  | 139  | 152  | 0.88     | 0.444179 | 103      | 83   | 97   | 103  | 139  | 109  | 139  | 109  | 109  | 139  | 0.83     | 0.022628 | 139      | 0.83     | 0.081356 |          |
| 258029_at   | A13g27580 | serine/threonine protein kinase. PK7 i protein kinase, putative                          | 57   | 76   | 70   | 90   | 98   | 74   | 68   | 87   | 0.78     | 0.091454 | 61       | 67   | 77   | 111  | 94   | 74   | 92   | 75   | 68   | 89   | 0.77     | 0.080103 | 93       | 0.73     | 0.105112 |          |
| 258030_at   | A13g27590 | hypotheothical protein predicted by geneer hypotheothical protein                        | 41   | 49   | 57   | 56   | 55   | 51   | 49   | 54   | 0.91     | 0.365545 | 42       | 37   | 53   | 50   | 46   | 41   | 61   | 50   | 44   | 49   | 0.90     | 0.389367 | 46       | 0.97     | 0.820672 |          |
| 258031_s_at | A13g27490 | hypotheothical protein similar to hvootheoti DC1 domain-containing protein III DC1 c     | 18   | 23   | 28   | 24   | 26   | 27   | 23   | 23   | 0.26     | 0.88     | 0.404589 | 19   | 21   | 24   | 22   | 17   | 20   | 20   | 22   | 19   | 1.14     | 0.197695 | 18       | 1.17     | 0.261050 |          |
| 257997_at   | A13g27500 | hypotheothical protein similar to hvootheoti DC1 domain-containing protein               | 17   | 22   | 25   | 24   | 27   | 23   | 21   | 23   | 0.86     | 0.275441 | 11       | 15   | 17   | 18   | 13   | 14   | 17   | 14   | 14   | 15   | 0.94     | 0.605275 | 15       | 0.95     | 0.470307 |          |
| 257998_at   | A13g27510 | hypotheothical protein similar to hvootheoti DC1 domain-containing protein               | 11   | 13   | 15   | 13   | 13   | 19   | 13   | 15   | 0.88     | 0.444179 | 10       | 11   | 14   | 17   | 10   | 11   | 14   | 13   | 12   | 13   | 0.92     | 0.581078 | 13       | 0.95     | 0.822056 |          |
| 257999_at   | A13g27540 | hypotheothical protein similar to hvootheoti glycosyl transferase family 17 protein      | 80   | 99   | 116  | 165  | 172  | 126  | 98   | 154  | 0.64     | 0.033768 | 69       | 56   | 73   | 99   | 73   | 78   | 79   | 75   | 66   | 81   | 0.81     | 0.079493 | 83       | 0.79     | 0.133373 |          |
| 257998_at   | A13g27550 | hypotheothical protein predicted by geneer aroup II intron splicing factor CRS1-relat    | 45   | 49   | 57   | 65   | 64   | 65   | 51   | 65   | 0.78     | 0.017382 | 47       | 41   | 46   | 66   | 51   | 44   | 48   | 49   | 45   | 52   | 0.87     | 0.243685 | 54       | 0.83     | 0.262172 |          |
| 257999_at   | A13g27520 | hypotheothical protein predicted by geneer expressed protein                             | 84   | 116  | 108  | 137  | 128  | 121  | 103  | 129  | 0.80     | 0.062646 | 89       | 125  | 102  | 189  | 119  | 111  | 132  | 122  | 105  | 135  | 0.78     | 0.193811 | 140      | 0.75     | 0.268229 |          |
| 257970_at   | A13g27570 | putative sucrose cleavage protein simil expressed protein                                | 358  | 395  | 497  | 517  | 579  | 478  | 416  | 525  | 0.77     | 0.101428 | 418      | 437  | 451  | 670  | 516  | 439  | 502  | 488  | 435  | 523  | 0.83     | 0.145153 | 542      | 0.80     | 0.195679 |          |
| 257971_at   | A13g27530 | unknown protein similar to hvootheoti vesicle tethering family protein                   | 194  | 248  | 258  | 251  | 272  | 204  | 232  | 242  | 0.96     | 0.741883 | 166      | 151  | 186  | 189  | 179  | 140  | 181  | 161  | 168  | 170  | 0.99     | 0.884781 | 169      | 0.99     | 0.944735 |          |
| 257972_at   | A13g27560 | putative protein kinase, ATN1 almost i protein kinase (ATN1)                             | 123  | 166  | 195  | 208  | 203  | 159  | 162  | 190  | 0.85     | 0.337417 | 157      | 152  | 161  | 224  | 186  | 163  | 198  | 209  | 157  | 196  | 0.80     | 0.031154 | 191      | 0.82     | 0.131887 |          |
| 257973_at   | A13g27020 | unknown protein                                                                          | 115  | 147  | 156  | 162  | 194  | 145  | 139  | 167  | 0.83     | 0.216509 | 100      | 93   | 115  | 137  | 113  | 96   | 117  | 113  | 103  | 115  | 0.89     | 0.252087 | 115      | 0.89     | 0.409301 |          |
| 257974_at   | A13g20820 | unknown protein similar to NA-DAMAG leucine-rich repeat family protein                   | 1221 | 1415 | 1408 | 1733 | 1819 | 1407 | 1348 | 1653 | 0.82     | 0.005856 | 1499     | 1553 | 1564 | 2571 | 1975 | 1869 | 1938 | 1858 | 1539 | 2042 | 0.75     | 0.030813 | 2138     | 0.72     | 0.052436 |          |
| 257975_at   | A13g20830 | unknown protein similar to GB-AD306 kinase family protein                                | 104  | 135  | 163  | 183  | 195  | 180  | 134  | 186  | 0.72     | 0.041158 | 115      | 98   | 128  | 238  | 188  | 158  | 166  | 158  | 114  | 182  | 0.63     | 0.017963 | 195      | 0.58     | 0.031266 |          |
| 257976_at   | A13g20840 | putative transcription factor contains A ovule development protein, putative             | 33   | 41   | 43   | 43   | 42   | 35   | 39   | 40   | 0.96     | 0.717828 | 27       | 31   | 34   | 34   | 30   | 38   | 36   | 32   | 31   | 32   | 0.95     | 0.428817 | 31       | 0.98     | 0.794199 |          |
| 257977_at   | A13g20850 | hypotheothical protein predicted by geneer protein-like family protein                   | 24   | 21   | 31   | 21   | 28   | 26   | 32   | 25   | 0.29     | 0.887398 | 23       | 21   | 25   | 18   | 18   | 18   | 23   | 23   | 22   | 20   | 1.09     | 0.409516 | 18       | 1.21     | 0.075548 |          |
| 257978_at   | A13g20860 | putative serine/threonine protein kinase protein kinase family protein                   | 58   | 83   | 69   | 82   | 100  | 75   | 70   | 86   | 0.61     | 0.130063 | 59       | 50   | 66   | 91   | 55   | 55   | 90   | 70   | 58   | 72   | 0.80     | 0.244676 | 67       | 0.87     | 0.515849 |          |
| 257979_at   | A13g20730 | unknown protein                                                                          | 21   | 23   | 33   | 28   | 34   | 26   | 26   | 26   | 0.29     | 0.873665 | 21       | 24   | 24   | 23   | 22   | 18   | 20   | 18   | 23   | 20   | 1.11     | 0.198084 | 21       | 1.08     | 0.446917 |          |
| 257980_at   | A13g20760 | hypotheothical protein predicted by geneer hypotheothical protein                        | 48   | 49   | 62   | 72   | 58   | 63   | 56   | 65   | 0.87     | 0.407616 | 26       | 31   | 39   | 41   | 26   | 31   | 43   | 33   | 32   | 35   | 0.92     | 0.579411 | 33       | 0.97     | 0.873510 |          |
| 257981_at   | A13g20770 | ethvline-insensitive 3 (EIN3) identical t ethylene-insensitive 3 (EIN3)                  | 497  | 576  | 665  | 818  | 700  | 579  | 791  | 0.73 | 0.034931 | 360      | 385      | 415  | 642  | 525  | 426  | 566  | 555  | 587  | 543  | 0.71 | 0.017526 | 531      | 0.73     | 0.088644 |          |          |
| 257982_at   | A13g20780 | unknown protein similar to TYPE II DN1 topoisomerase 6 subunit B (TOP6B)                 | 375  | 788  | 788  | 886  | 700  | 579  | 791  | 0.73 | 0.034931 | 360      | 385      | 415  | 642  | 525  | 426  | 566  | 555  | 587  | 543  | 0.71 | 0.017526 | 531      | 0.73     | 0.088644 |          |          |
| 257983_at   | A13g20790 | hypotheothical protein predicted by geneer expressed protein                             | 858  | 897  | 768  | 821  | 700  | 579  | 791  | 0.73 | 0.034931 | 360      | 385      | 415  | 642  | 525  | 426  | 566  | 555  | 587  | 543  | 0.71 | 0.017526 | 531      | 0.73     | 0.088644 |          |          |
| 257984_at   | A13g20800 | putative cell differentiation protein simil rcd1-like cell differentiation protein, puta | 55   | 713  | 547  | 601  | 706  | 518  | 478  | 608  | 0.79     | 0.162071 | 551      | 616  | 575  | 806  | 613  | 661  | 582  | 577  | 581  | 648  | 0.90     | 0.290687 | 693      | 0.84     | 0.138821 |          |
| 257985_at   | A13g20810 | hypotheothical protein predicted by geneer transcription factor lumoni (lmiC) domai      | 320  | 356  | 587  | 238  | 667  | 437  | 421  | 447  | 0.94     | 0.868254 | 596      | 769  | 890  | 559  | 496  | 829  | 737  | 750  | 752  | 666  | 1.13     | 0.465882 | 614      | 1.22     | 0.302687 |          |
| 257986_at   | A13g20865 | Expressed protein ; supported by full-le arabinogalactan-protein, putative (AGP)         | 730  | 60   | 62   | 57   | 61   | 43   | 65   | 54   | 1.21     | 0.177136 | 54       | 52   | 49   | 52   | 35   | 44   | 38   | 40   | 52   | 42   | 1.24     | 0.043134 | 44       | 1.19     | 0.168613 |          |
| 257987_at   | A13g20740 | fertilization-independent endosperm or fertilization-independent endosperm ort           | 378  | 348  | 346  | 378  | 401  | 329  | 319  | 369  | 0.86     | 0.170300 | 297      | 291  | 330  | 492  | 366  | 329  | 367  | 374  | 306  | 391  | 0.78     | 0.047421 | 396      | 0.77     | 0.154342 |          |
| 257988_at   | A13g20870 | unknown protein ; supported by cDNA: metal transporter family protein                    | 301  | 436  | 412  | 525  | 571  | 473  | 383  | 523  | 0.73     | 0.049406 | 421      | 469  | 441  | 715  | 533  | 502  | 560  | 541  | 444  | 570  | 0.78     | 0.047467 | 583      | 0.76     | 0.108693 |          |
| 257989_at   | A13g19770 | unknown protein ; supported by cDNA: vacuolar sortino protein 9 domain-contain           | 98   | 138  | 141  | 171  | 176  | 147  | 126  | 165  | 0.77     | 0.078059 | 108      | 109  | 119  | 172  | 134  | 122  | 139  | 124  | 112  | 138  | 0.81     | 0.076334 | 142      | 0.79     | 0.102045 |          |
| 257990_at   | A13g19860 | putative myc-like DNA-binding protein i basic helix-loop-helix (bHLH) family prot        | 198  | 312  | 362  | 257  | 300  | 218  | 291  | 258  | 1.13     | 0.580156 | 272      | 356  | 275  | 401  | 320  | 320  | 306  | 276  | 301  | 325  | 0.93     | 0.513280 | 347      | 0.87     | 0.298259 |          |
| 257991_at   | A13g19870 | unknown protein                                                                          | 199  | 262  | 244  | 258  | 229  | 247  | 244  | 1.01 | 0.004500 | 205      | 194      | 234  | 252  | 215  | 196  | 226  | 236  | 211  | 226  | 219  | 0.94     | 0.363719 | 222      | 0.95     | 0.070306 |          |
| 257992_at   | A13g19880 | hypotheothical protein similar to hvootheoti F-box family protein                        | 17   | 24   | 20   | 21   | 22   | 22   | 20   | 22   | 0.94     | 0.543714 | 14       | 28   | 21   | 18   | 14   | 23   | 18   | 21   | 18   | 11   | 1.19     | 0.405002 | 16       | 1.34     | 0.298244 |          |
| 257993_at   | A13g19890 | hypotheothical protein similar to hvootheoti F-box family protein                        | 10   | 14   | 17   | 15   | 14   | 18   | 14   | 15   | 0.89     | 0.508056 | 10       | 12   | 13   | 11   | 10   | 10   | 10   | 18   | 12   | 12   | 1.12     | 0.705662 | 10       | 1.10     | 0.272372 |          |
| 257994_at   | A13g19920 | unknown protein                                                                          | 25   | 25   | 37   | 140  | 38   | 35   | 29   | 71   | 0.41     | 0.298129 | 23       | 25   | 31   | 20   | 28   | 21   | 20   | 21   | 18   | 25   | 2.22     | 1.17     | 0.247376 | 23       | 1.10     | 0.538722 |
| 257995_at   | A13g19940 | putative monosaccharide transport or sugar transporter, putative                         | 45   | 51   | 47   | 55   | 62   | 54   | 51   | 58   | 0.88     | 0.289374 | 31       | 34   | 35   | 41   | 36   | 29   | 31   | 41   | 36   | 34   | 1.04     | 0.730149 | 32       | 1.11     | 0.362627 |          |
| 257996_at   | A13g19930 | unknown protein                                                                          | 189  | 263  | 288  | 306  | 328  | 253  | 247  | 296  | 0.83     | 0.256300 | 244      | 245  | 261  | 285  | 263  | 285  | 320  | 290  | 247  | 296  | 0.83     | 0.134721 | 302      | 0.85     | 0.242400 |          |
| 257997_at   | A13g19970 | unknown protein                                                                          | 5    | 3    | 1    | 2    | 4    | 1    | 3    | 2    | 1.36     | 0.604605 | 0        | 5    | 3    | 1    | 2    | 4    | 1    | 2    | 3    | 2    | 1.59     | 0.431352 | 2        | 1.38     | 0.663601 |          |
| 257992_at   | A13g19790 | hypotheothical protein predicted by geneer hypotheothical protein predicted by geneer    | 351  | 419  | 474  | 491  | 574  | 432  | 415  | 499  | 0.83     | 0.195910 | 447      | 466  | 468  | 791  | 554  | 569  | 546  | 508  | 460  | 593  | 0.78     | 0.095888 | 638      | 0.72     | 0.082532 |          |
| 257993_at   | A13g19840 | hypotheothical protein predicted by geneer FF domain-containing protein / WW dom         | 200  | 229  | 223  | 233  | 243  | 205  | 195  | 227  | 0.86     | 0.255424 | 133      | 129  | 150  | 162  | 127  | 137  | 165  | 163  | 162  | 137  | 0.83     | 0.036813 | 164      | 0.84     | 0.117233 |          |
| 257994_at   | A13g19850 | hypotheothical protein similar to hvootheoti photoreceptor-responsive NPH3 ring finger   | 85   | 115  | 20   | 113  | 111  | 168  | 85   | 117  | 0.63     | 0.148412 | 48       | 42   | 53   | 68   | 57   | 64   | 52   | 51   | 48   | 68   | 0.74     | 0.011010 | 68       | 0.80     | 0.035632 |          |
| 257995_at   | A13g19900 | unknown protein ; supported by full-len expressed protein                                | 79   | 108  | 122  | 120  | 121  | 116  | 103  | 119  | 0.87     | 0.285463 | 99       | 130  | 122  | 173  | 131  | 117  | 156  | 130  | 117  | 142  |          |          |          |          |          |          |

|             |           |                                                                                     |      |      |      |      |      |      |      |      |          |          |      |      |      |      |      |      |      |      |      |      |       |          |      |       |          |
|-------------|-----------|-------------------------------------------------------------------------------------|------|------|------|------|------|------|------|------|----------|----------|------|------|------|------|------|------|------|------|------|------|-------|----------|------|-------|----------|
| 257926_at   | A3g232280 | unknown protein contains Pfam profile: zinc finger (C3HC4-type RING finger) fa      | 461  | 594  | 673  | 646  | 980  | 693  | 576  | 773  | 0.75     | 0.179077 | 758  | 622  | 718  | 960  | 973  | 894  | 934  | 882  | 699  | 928  | 0.75  | 0.000915 | 942  | 0.74  | 0.006695 |
| 257927_at   | A3g23240  | ethylene response factor 1 (ERF1) dier ethylene-responsive factor 1 / ethylene r    | 43   | 60   | 74   | 68   | 79   | 57   | 59   | 68   | 0.86     | 0.443544 | 41   | 53   | 53   | 44   | 45   | 45   | 53   | 39   | 49   | 45   | 1.08  | 0.380537 | 44   | 1.10  | 0.297743 |
| 257928_at   | A3g16890  | hydrothetical protein contains Pfam prof pentatricopeptide (PPR) repeat-contains    | 44   | 60   | 55   | 59   | 61   | 58   | 50   | 59   | 0.84     | 0.041011 | 43   | 50   | 56   | 61   | 46   | 50   | 49   | 50   | 51   | 51   | 0.88  | 0.806087 | 51   | 0.97  | 0.787115 |
| 257929_at   | A3g16980  | RNA Polymerase II subunit 14.5 kD. ca DNA-directed RNA polymerase II, outati        | 694  | 775  | 713  | 679  | 841  | 770  | 775  | 775  | 0.84     | 0.324466 | 790  | 691  | 856  | 776  | 866  | 776  | 808  | 824  | 827  | 706  | 0.84  | 0.516241 | 893  | 0.82  | 0.642630 |
| 257930_at   | A3g17010  | hydrothetical protein                                                               | 88   | 97   | 118  | 173  | 237  | 167  | 101  | 192  | 0.53     | 0.019852 | 33   | 32   | 45   | 71   | 67   | 52   | 41   | 43   | 37   | 55   | 0.67  | 0.090248 | 63   | 0.58  | 0.021285 |
| 257931_at   | A3g17030  | hydrothetical protein predicted by genei expressed protein                          | 106  | 140  | 142  | 164  | 163  | 154  | 129  | 161  | 0.81     | 0.063338 | 94   | 80   | 112  | 114  | 96   | 87   | 103  | 97   | 95   | 99   | 0.96  | 0.666837 | 99   | 0.96  | 0.784939 |
| 257932_at   | A3g17040  | unknown protein contains Pfam profile: tetraatricopeptide repeat (TPR)-contains     | 267  | 488  | 377  | 375  | 472  | 300  | 374  | 382  | 0.98     | 0.926190 | 350  | 369  | 337  | 491  | 395  | 371  | 379  | 370  | 362  | 401  | 0.88  | 0.189706 | 419  | 0.84  | 0.153011 |
| 257935_at   | A3g17050  | hydrothetical protein predicted by genei expressed protein                          | 55   | 67   | 75   | 67   | 76   | 68   | 67   | 76   | 0.88     | 0.426814 | 50   | 50   | 44   | 55   | 45   | 45   | 35   | 40   | 35   | 47   | 1.15  | 0.382583 | 42   | 0.90  | 0.014024 |
| 257874_at   | A3g17110  | hydrothetical protein                                                               | 43   | 48   | 69   | 55   | 64   | 67   | 54   | 62   | 0.87     | 0.399449 | 33   | 34   | 34   | 37   | 32   | 31   | 45   | 38   | 34   | 37   | 0.92  | 0.387261 | 34   | 1.01  | 0.886265 |
| 257875_at   | A3g17120  | hydrothetical protein                                                               | 48   | 44   | 55   | 63   | 62   | 49   | 49   | 58   | 0.84     | 0.168873 | 49   | 65   | 52   | 75   | 55   | 52   | 69   | 59   | 55   | 62   | 0.89  | 0.362792 | 61   | 0.91  | 0.577448 |
| 257876_at   | A3g17130  | hydrothetical protein predicted by genei inverse/lectin methyltransferase inhibitor | 64   | 82   | 122  | 131  | 140  | 117  | 89   | 129  | 0.69     | 0.094120 | 46   | 45   | 53   | 95   | 68   | 70   | 53   | 52   | 48   | 67   | 0.71  | 0.116686 | 78   | 0.62  | 0.029244 |
| 257877_at   | A3g17140  | hydrothetical protein                                                               | 104  | 124  | 177  | 97   | 115  | 111  | 134  | 108  | 1.24     | 0.034466 | 81   | 74   | 81   | 46   | 32   | 52   | 58   | 49   | 79   | 43   | 1.82  | 0.002170 | 36   | 2.16  | 0.001229 |
| 257878_at   | A3g17150  | hydrothetical protein predicted by genei inverse/lectin methyltransferase inhibitor | 311  | 363  | 524  | 27   | 27   | 25   | 399  | 26   | 0.85     | 0.004375 | 1072 | 1137 | 1153 | 29   | 30   | 56   | 37   | 37   | 1121 | 38   | 29.18 | 0.000000 | 39   | 28.45 | 0.000002 |
| 257879_at   | A3g17160  | AMP-binding protein, putative contains AMP-dependent synthetase and liqase f        | 1395 | 1567 | 1676 | 1758 | 1838 | 1679 | 1546 | 1758 | 0.88     | 0.086300 | 1416 | 1388 | 1499 | 2018 | 1402 | 1411 | 1607 | 1551 | 1434 | 1616 | 0.89  | 0.251533 | 1641 | 0.87  | 0.346069 |
| 257880_at   | A3g16910  | AMP-binding protein, putative contains AMP-dependent synthetase and liqase f        | 235  | 241  | 310  | 255  | 322  | 241  | 242  | 273  | 0.89     | 0.543653 | 180  | 178  | 201  | 281  | 225  | 212  | 234  | 221  | 186  | 235  | 0.79  | 0.030831 | 239  | 0.78  | 0.078859 |
| 257881_at   | A3g17180  | putative serine carboxypeptidase II sim serine carboxypeptidase S10 family vrot     | 32   | 40   | 44   | 54   | 60   | 47   | 39   | 53   | 0.73     | 0.053046 | 26   | 30   | 26   | 30   | 26   | 28   | 26   | 26   | 27   | 27   | 1.00  | 0.960744 | 28   | 0.98  | 0.742085 |
| 257882_at   | A3g16930  | hydrothetical protein predicted by genei hydrothetical protein                      | 10   | 15   | 20   | 19   | 18   | 23   | 15   | 20   | 0.75     | 0.183090 | 12   | 14   | 17   | 14   | 12   | 11   | 9    | 12   | 14   | 12   | 1.22  | 0.112575 | 12   | 1.16  | 0.274474 |
| 257883_at   | A3g16940  | calmodulin-binding protein, putative co calmodulin-binding protein                  | 187  | 302  | 313  | 297  | 321  | 251  | 267  | 290  | 0.92     | 0.646367 | 199  | 162  | 191  | 247  | 218  | 175  | 217  | 224  | 184  | 216  | 0.85  | 0.117871 | 213  | 0.86  | 0.287112 |
| 257884_at   | A3g16960  | hydrothetical protein predicted by genei hydrothetical protein                      | 30   | 32   | 41   | 38   | 34   | 41   | 34   | 38   | 0.91     | 0.438967 | 32   | 33   | 37   | 28   | 24   | 32   | 42   | 33   | 34   | 32   | 1.07  | 0.594422 | 28   | 1.22  | 0.099686 |
| 257885_at   | A3g16970  | S1 self-incompatibility protein, putative self-incompatibility protein-related      | 28   | 40   | 36   | 41   | 48   | 40   | 35   | 43   | 0.80     | 0.121849 | 32   | 35   | 38   | 38   | 42   | 36   | 35   | 30   | 35   | 36   | 0.97  | 0.278666 | 39   | 0.91  | 0.227342 |
| 257886_at   | A3g17060  | pectinesterase, putative similar to pect pectinesterase family protein              | 52   | 54   | 68   | 57   | 68   | 59   | 58   | 59   | 0.61     | 0.214986 | 46   | 45   | 56   | 41   | 42   | 42   | 49   | 49   | 42   | 42   | 1.16  | 0.103354 | 42   | 1.17  | 0.103621 |
| 257887_at   | A3g17090  | protein chophosphate-2c, putative simli protein chophosphate 2C family protein /    | 305  | 418  | 433  | 449  | 485  | 403  | 385  | 446  | 0.86     | 0.266363 | 368  | 420  | 413  | 583  | 452  | 408  | 414  | 385  | 401  | 449  | 0.89  | 0.361219 | 481  | 0.83  | 0.216997 |
| 257888_at   | A3g16990  | seed maturation protein, putative simli TENA/THI-4 family protein                   | 132  | 160  | 187  | 190  | 189  | 151  | 160  | 177  | 0.90     | 0.443333 | 166  | 182  | 184  | 262  | 192  | 190  | 206  | 210  | 177  | 212  | 0.84  | 0.101253 | 215  | 0.83  | 0.200774 |
| 257889_at   | A3g17080  | S1 self-incompatibility protein, putative self-incompatibility protein-related      | 140  | 202  | 226  | 30   | 36   | 25   | 187  | 30   | 0.18     | 0.020931 | 349  | 318  | 359  | 20   | 17   | 26   | 18   | 15   | 342  | 19   | 17.76 | 0.000000 | 21   | 16.44 | 0.000013 |
| 257890_s_at | A3g242570 | putative protein peroxidase - Lycopene peroxidase, putative // peroxidase-relati    | 950  | 973  | 1130 | 1138 | 1044 | 937  | 1018 | 1029 | 0.99     | 0.895233 | 961  | 1170 | 1073 | 1313 | 1586 | 1484 | 1100 | 1160 | 1068 | 1488 | 0.72  | 0.136344 | 1726 | 0.62  | 0.031961 |
| 257891_at   | A3g17170  | hydrothetical protein predicted by genei ribosomal protein S6 family protein (RFC   | 180  | 311  | 256  | 280  | 261  | 219  | 249  | 247  | 1.01     | 0.966919 | 203  | 206  | 234  | 275  | 210  | 214  | 238  | 232  | 214  | 234  | 0.92  | 0.301709 | 233  | 0.92  | 0.471839 |
| 257892_at   | A3g17020  | unknown protein similar to ERG protein, universal stress protein (USP) family prc   | 944  | 1195 | 1370 | 1399 | 1720 | 1258 | 1169 | 1459 | 0.80     | 0.191194 | 1554 | 1727 | 1434 | 1931 | 1735 | 1657 | 1808 | 1836 | 1572 | 1793 | 0.88  | 0.044730 | 1774 | 0.89  | 0.160773 |
| 257893_at   | A3g17000  | E2, ubiquitin-conjugatino enzmve, outis ubiquitin-conjugating enzyme, putative      | 991  | 556  | 624  | 542  | 604  | 445  | 523  | 530  | 0.99     | 0.936382 | 493  | 599  | 524  | 728  | 604  | 537  | 584  | 578  | 539  | 606  | 0.89  | 0.215343 | 623  | 0.86  | 0.258225 |
| 257894_at   | A3g17100  | unknown protein , supported by cDNA, expressed protein                              | 213  | 285  | 305  | 280  | 362  | 244  | 268  | 295  | 0.91     | 0.574725 | 390  | 411  | 358  | 438  | 391  | 351  | 364  | 351  | 366  | 379  | 1.12  | 0.761461 | 383  | 0.98  | 0.836862 |
| 257895_at   | A3g16950  | divinyltetraamine dehydrogenase, outis divihydroxymethyl dehydrogenase 1, clari     | 159  | 209  | 172  | 227  | 205  | 194  | 211  | 213  | 0.83     | 0.090376 | 138  | 119  | 172  | 210  | 193  | 199  | 140  | 173  | 174  | 178  | 0.80  | 0.118492 | 192  | 0.79  | 0.211895 |
| 257896_at   | A3g16920  | basic chitinase, putative similar to basi glycosyl hydrolase family 19 protein      | 34   | 45   | 45   | 57   | 76   | 58   | 41   | 63   | 0.65     | 0.035196 | 36   | 42   | 30   | 69   | 44   | 37   | 37   | 32   | 36   | 46   | 0.79  | 0.317309 | 53   | 0.68  | 0.115680 |
| 257897_at   | A3g16030  | HAL3A protein identical to GB-AD516 halotolerance protein (HAL3A)                   | 278  | 356  | 373  | 371  | 387  | 332  | 336  | 363  | 0.92     | 0.456798 | 352  | 355  | 368  | 547  | 411  | 386  | 401  | 394  | 358  | 428  | 0.84  | 0.135201 | 448  | 0.80  | 0.149621 |
| 257898_s_at | A3g30670  | hydrothetical protein predicted by genei CACTA-like transposase family (PttA/en     | 7    | 7    | 6    | 8    | 5    | 6    | 6    | 6    | 1.00     | 0.974054 | 4    | 5    | 5    | 6    | 5    | 6    | 3    | 6    | 6    | 6    | 0.84  | 0.394553 | 5    | 0.89  | 0.888131 |
| 257899_at   | A3g28345  | P-oligocrotein, putative similar to P-oh ABC transporter family protein             | 16   | 26   | 23   | 31   | 31   | 25   | 25   | 29   | 0.74     | 0.039327 | 15   | 13   | 16   | 15   | 14   | 16   | 15   | 17   | 12   | 14   | 0.97  | 0.732653 | 15   | 0.97  | 0.817661 |
| 257900_at   | A3g28420  | hydrothetical protein predicted by genei expressed protein                          | 68   | 106  | 109  | 82   | 96   | 75   | 94   | 84   | 1.12     | 0.530971 | 40   | 41   | 57   | 51   | 36   | 42   | 38   | 37   | 46   | 41   | 1.13  | 0.375775 | 43   | 1.07  | 0.678687 |
| 257901_at   | A3g28440  | hydrothetical protein predicted by genei hydrothetical protein                      | 32   | 38   | 54   | 51   | 61   | 53   | 42   | 55   | 0.76     | 0.143748 | 26   | 23   | 36   | 30   | 29   | 28   | 29   | 29   | 27   | 28   | 0.98  | 0.853598 | 29   | 0.96  | 0.800820 |
| 257902_at   | A3g28450  | receptor kinase, putative similar to rec leucine-rich repeat transmembrane prot     | 97   | 119  | 136  | 153  | 159  | 121  | 117  | 144  | 0.81     | 0.171732 | 97   | 91   | 105  | 140  | 113  | 108  | 129  | 119  | 98   | 122  | 0.80  | 0.030552 | 120  | 0.82  | 0.117064 |
| 257903_at   | A3g28460  | unknown protein                                                                     | 122  | 157  | 169  | 209  | 205  | 158  | 200  | 0.77 | 0.060322 | 110      | 115  | 130  | 163  | 114  | 123  | 116  | 128  | 118  | 133  | 136  | 0.86  | 0.221553 | 133  | 0.89  | 0.105862 |
| 257904_at   | A3g28470  | myb transcription factor, putative simli myb family transcription factor (MYB35)    | 17   | 17   | 21   | 16   | 17   | 20   | 18   | 18   | 1.04     | 0.723901 | 14   | 17   | 14   | 9    | 13   | 10   | 11   | 14   | 15   | 13   | 1.12  | 0.603790 | 11   | 1.40  | 0.055285 |
| 257870_at   | A3g28490  | crovli 4-hydroxylase, putative similar ti oxidoreductase, 2OG-Fe(II) oxoenase I     | 27   | 32   | 33   | 22   | 25   | 21   | 31   | 23   | 1.34     | 0.028398 | 47   | 64   | 43   | 15   | 12   | 13   | 14   | 12   | 51   | 13   | 3.92  | 0.000178 | 13   | 3.91  | 0.003833 |
| 257871_at   | A3g28350  | hydrothetical protein predicted by genei hydrothetical protein                      | 26   | 26   | 25   | 24   | 30   | 28   | 26   | 27   | 0.94     | 0.462594 | 19   | 19   | 23   | 22   | 21   | 19   | 21   | 25   | 20   | 22   | 0.94  | 0.453798 | 21   | 0.98  | 0.810715 |
| 257872_at   | A3g28360  | P-oligocrotein, putative similar to P-oh ABC transporter family protein             | 14   | 14   | 15   | 17   | 21   | 16   | 15   | 18   | 0.81     | 0.108767 | 16   | 15   | 18   | 13   | 16   | 13   | 16   | 13   | 16   | 15   | 1.13  | 0.336557 | 14   | 1.19  | 0.163328 |
| 257873_at   | A3g28380  | P-oligocrotein, putative similar to P-oh P-glycoprotein, putative                   | 15   | 25   | 16   | 21   | 16   | 21   | 19   | 20   | 0.85     | 0.178467 | 12   | 22   | 15   | 11   | 16   | 13   | 12   | 10   | 15   | 17   | 1.17  | 0.456516 | 12   | 1.47  | 0.323478 |
| 257842_at   | A3g28390  | P-glycoprotein, putative similar to P-gh P-glycoprotein, putative                   | 19   | 25   | 30   | 33   | 37   | 32   | 25   | 34   | 0.73     | 0.062235 | 20   | 23   | 25   | 35   | 26   | 28   | 30   | 26   | 23   | 29   | 0.78  | 0.050505 | 30   | 0.76  | 0.094449 |
| 257843_at   | A3g28400  | hydrothetical protein predicted by genei hAT-like transposase family (hobo/AC/Ts    | 17   | 17   | 18   | 21   | 21   | 16   | 17   | 19   | 0.86     | 0.210787 | 10   | 11   | 15   | 16   | 16   | 10   | 17   | 13   | 12   | 14   | 0.86  | 0.372152 | 14   | 0.90  | 0.599106 |
| 257844_at   | A3g28480  | crovli 4-hydroxylase, putative similar ti oxidoreductase, 2OG-Fe(II) oxoenase I     | 226  | 267  | 306  | 276  | 311  | 263  | 266  | 283  | 0.94     | 0.561823 | 258  | 289  | 284  | 355  | 289  | 275  | 234  | 233  | 277  | 277  | 1.00  | 0.994107 | 306  | 0.90  | 0.330919 |
| 257845_at   | A3g28430  | unknown protein                                                                     | 102  | 145  | 137  | 137  | 105  | 137  | 102  | 145  | 0.85     | 0.096477 | 132  | 102  | 95   | 95   | 128  | 104  | 107  | 106  | 104  | 107  | 0.80  | 0.244624 | 108  | 0.88  | 0.317309 |
| 257846_at   | A3g12910  | unknown protein                                                                     | 21   | 29   | 21   | 20   | 23   | 23   | 24   | 22   | 1.08     | 0.580878 | 15   | 14   | 16   | 21   | 14   | 19   | 19   | 18   | 15   | 18   | 0.    |          |      |       |          |

|        |           |                                                                                                      |      |      |      |      |      |      |      |      |          |          |      |      |      |      |      |      |      |      |      |      |          |          |      |          |          |
|--------|-----------|------------------------------------------------------------------------------------------------------|------|------|------|------|------|------|------|------|----------|----------|------|------|------|------|------|------|------|------|------|------|----------|----------|------|----------|----------|
| 257832 | At3g26710 | unknown protein . supported by full-len expressed protein                                            | 165  | 209  | 303  | 294  | 300  | 247  | 255  | 280  | 0.91     | 0.622610 | 208  | 242  | 243  | 320  | 215  | 232  | 219  | 206  | 233  | 239  | 0.97     | 0.790689 | 256  | 0.90     | 0.502328 |
| 257833 | At3g26720 | light regulated protein, putative similar to light responsive protein-related                        | 608  | 1092 | 1728 | 268  | 701  | 282  | 1142 | 417  | 2.74     | 0.109879 | 1582 | 1736 | 980  | 1418 | 1465 | 1516 | 2474 | 2353 | 1430 | 1845 | 0.98     | 0.287915 | 1467 | 0.98     | 0.981963 |
| 257834 | At3g26640 | transcriptional regulator protein, outath transducin family protein / WD-40 repeat                   | 256  | 297  | 332  | 356  | 407  | 312  | 292  | 358  | 0.82     | 0.120917 | 297  | 306  | 136  | 459  | 377  | 347  | 405  | 381  | 306  | 394  | 0.78     | 0.012880 | 394  | 0.78     | 0.058832 |
| 257835 | At3g26720 | alpha-mannosidase, outath similar to glycosyl hydrolase family 38 repeat                             | 456  | 589  | 560  | 571  | 661  | 501  | 535  | 578  | 0.83     | 0.527357 | 384  | 396  | 422  | 431  | 435  | 321  | 481  | 454  | 401  | 425  | 0.94     | 0.543723 | 396  | 1.01     | 0.907382 |
| 257836 | At3g26707 | glyceroldehyde 3-phosphate dehydrogenase, outath similar to glyceraldehyde 3-phosphate dehydrogenase | 257  | 307  | 332  | 356  | 407  | 312  | 292  | 358  | 0.82     | 0.120917 | 297  | 306  | 136  | 459  | 377  | 347  | 405  | 381  | 306  | 394  | 0.78     | 0.012880 | 394  | 0.78     | 0.058832 |
| 257837 | At3g18524 | unknown protein, putative contains Pfz zinc finger (DHHC type) family protein                        | 205  | 251  | 231  | 331  | 375  | 275  | 229  | 327  | 0.70     | 0.306795 | 201  | 202  | 202  | 281  | 244  | 224  | 238  | 202  | 246  | 246  | 0.82     | 0.013331 | 249  | 0.81     | 0.046903 |
| 257838 | At3g26700 | ribonucleotide reductase small subunit ribonucleotide-diphosphate reductase s                        | 1150 | 1240 | 1045 | 1784 | 1760 | 1535 | 1145 | 1693 | 0.68     | 0.004918 | 1466 | 1324 | 1596 | 2099 | 1653 | 1517 | 1552 | 1568 | 1462 | 1681 | 0.87     | 0.203313 | 1756 | 0.83     | 0.201466 |
| 257839 | At3g27070 | TOM20, putative similar to TOM20 GB mitochondrial import receptor subunit TC                         | 38   | 44   | 48   | 58   | 60   | 50   | 43   | 58   | 0.75     | 0.055233 | 37   | 37   | 35   | 42   | 33   | 38   | 42   | 40   | 34   | 39   | 0.87     | 0.109373 | 38   | 0.90     | 0.325979 |
| 257779 | At3g26930 | protein kinase, outath similar to FRCP protein kinase family protein                                 | 35   | 47   | 53   | 59   | 50   | 45   | 60   | 45   | 0.60     | 0.054540 | 50   | 35   | 30   | 36   | 30   | 36   | 34   | 37   | 34   | 37   | 0.95     | 0.166553 | 35   | 0.97     | 0.315593 |
| 257780 | At3g27100 | unknown protein, putative similar to venaer expressed protein                                        | 175  | 220  | 233  | 232  | 278  | 208  | 240  | 0.87 | 0.303900 | 205      | 229  | 216  | 289  | 253  | 218  | 249  | 249  | 217  | 255  | 249  | 0.86     | 0.077078 | 253  | 0.86     | 0.165439 |
| 257781 | At3g27120 | soatin protein, outath similar to soat spast ATPase, putative                                        | 68   | 93   | 88   | 101  | 114  | 85   | 83   | 100  | 0.83     | 0.236711 | 55   | 48   | 53   | 72   | 58   | 49   | 51   | 51   | 52   | 56   | 1.02     | 0.460233 | 60   | 0.87     | 0.325020 |
| 257782 | At3g27130 | hydroethanol protein predicted by venaer hypothetical protein                                        | 51   | 50   | 75   | 62   | 60   | 64   | 59   | 62   | 0.94     | 0.688422 | 49   | 44   | 65   | 42   | 51   | 54   | 40   | 43   | 53   | 46   | 1.15     | 0.281904 | 49   | 1.08     | 0.614546 |
| 257783 | At3g26950 | unknown protein                                                                                      | 153  | 190  | 176  | 243  | 155  | 198  | 173  | 231  | 0.75     | 0.042046 | 148  | 186  | 165  | 248  | 191  | 168  | 219  | 161  | 160  | 207  | 0.77     | 0.041409 | 162  | 0.79     | 0.155043 |
| 257784 | At3g26970 | ceranylearvinylated protein, putative si ubiquitin family protein                                    | 83   | 104  | 104  | 142  | 131  | 121  | 143  | 130  | 0.73     | 0.057419 | 92   | 130  | 111  | 125  | 203  | 142  | 102  | 92   | 175  | 162  | 0.92     | 0.014446 | 102  | 0.92     | 0.046903 |
| 257785 | At3g26980 | ceranylearvinylated protein, putative si ubiquitin family protein                                    | 89   | 102  | 139  | 155  | 152  | 145  | 110  | 150  | 0.73     | 0.057419 | 110  | 141  | 120  | 190  | 149  | 150  | 144  | 133  | 124  | 153  | 0.81     | 0.088611 | 163  | 0.76     | 0.072793 |
| 257786 | At3g26990 | hydroethanol protein predicted by venaer expressed protein                                           | 103  | 122  | 112  | 135  | 171  | 112  | 112  | 140  | 0.80     | 0.202951 | 74   | 59   | 84   | 77   | 69   | 88   | 80   | 72   | 79   | 91   | 0.91     | 0.342811 | 76   | 0.95     | 0.657092 |
| 257787 | At3g27000 | actin related protein, outath similar to actin-related protein 2 (ARP2)                              | 156  | 196  | 201  | 223  | 241  | 204  | 184  | 222  | 0.83     | 0.100719 | 162  | 150  | 183  | 244  | 206  | 171  | 196  | 187  | 165  | 201  | 0.82     | 0.091124 | 207  | 0.80     | 0.146054 |
| 257788 | At3g27010 | unknown protein                                                                                      | 156  | 196  | 201  | 223  | 241  | 204  | 184  | 222  | 0.83     | 0.100719 | 162  | 150  | 183  | 244  | 206  | 171  | 196  | 187  | 165  | 201  | 0.82     | 0.091124 | 207  | 0.80     | 0.146054 |
| 257789 | At3g27020 | unknown protein, putative similar to full-len oligopeptide transporter OPT family prot               | 172  | 234  | 240  | 280  | 285  | 199  | 216  | 255  | 0.85     | 0.331875 | 154  | 159  | 167  | 255  | 200  | 179  | 219  | 208  | 163  | 212  | 0.77     | 0.028270 | 211  | 0.77     | 0.105089 |
| 257790 | At3g27090 | qda-1, putative similar to qda-1 GB-CA expressed protein                                             | 626  | 809  | 827  | 985  | 1042 | 706  | 754  | 911  | 0.83     | 0.288159 | 846  | 864  | 864  | 1148 | 918  | 870  | 804  | 862  | 848  | 920  | 0.92     | 0.400774 | 979  | 0.87     | 0.204739 |
| 257791 | At3g27110 | unknown protein contains Pfam profile: peptidase M48 family protein                                  | 82   | 110  | 133  | 133  | 99   | 108  | 121  | 90   | 0.90     | 0.531007 | 112  | 114  | 117  | 170  | 137  | 127  | 128  | 121  | 114  | 136  | 0.84     | 0.108003 | 145  | 0.79     | 0.084797 |
| 257792 | At3g27080 | At3g27080, outath similar to TOM20 GB mitochondrial import receptor subunit TC                       | 130  | 140  | 133  | 143  | 695  | 624  | 454  | 579  | 0.67     | 0.046699 | 506  | 522  | 531  | 777  | 609  | 570  | 550  | 520  | 613  | 0.85 | 0.052228 | 645      | 0.85 | 0.172326 |          |
| 257793 | At3g26960 | unknown protein . supported by full-len expressed protein                                            | 35   | 36   | 40   | 47   | 51   | 74   | 47   | 50   | 0.44     | 0.010004 | 24   | 24   | 24   | 24   | 24   | 24   | 24   | 24   | 24   | 24   | 0.44     | 0.001852 | 55   | 0.42     | 0.007367 |
| 257794 | At3g26750 | hydroethanol protein predicted by venaer expressed protein                                           | 226  | 236  | 236  | 238  | 263  | 229  | 212  | 243  | 0.87     | 0.218801 | 193  | 196  | 199  | 294  | 209  | 213  | 194  | 193  | 196  | 221  | 0.89     | 0.360488 | 239  | 0.82     | 0.197949 |
| 257795 | At3g25910 | hypothetical protein predicted by venaer hypothetical protein                                        | 24   | 21   | 29   | 26   | 22   | 24   | 25   | 24   | 1.03     | 0.790824 | 21   | 27   | 26   | 18   | 19   | 20   | 24   | 22   | 25   | 21   | 1.20     | 0.091568 | 19   | 1.29     | 0.061252 |
| 257796 | At3g15530 | hypothetical protein predicted by venaer pentatricopeptide repeat (PTP) repeat-containi              | 21   | 26   | 32   | 32   | 38   | 28   | 23   | 31   | 0.73     | 0.023900 | 19   | 28   | 24   | 21   | 19   | 19   | 21   | 19   | 21   | 1.11 | 0.117357 | 20       | 1.17 | 0.238847 |          |
| 257797 | At3g15540 | hypothetical protein predicted by venaer pentatricopeptide repeat (PTP) repeat-containi              | 137  | 175  | 201  | 201  | 215  | 159  | 190  | 0.84 | 0.250243 | 123      | 124  | 143  | 143  | 194  | 164  | 154  | 148  | 154  | 154  | 0.84 | 0.042482 | 154      | 0.82 | 0.114524 |          |
| 257798 | At3g15590 | unknown protein                                                                                      | 14   | 19   | 20   | 23   | 28   | 18   | 25   | 0.72 | 0.039463 | 10       | 12   | 15   | 11   | 14   | 13   | 12   | 12   | 13   | 13   | 0.94 | 0.623375 | 13       | 0.92 | 0.607340 |          |
| 257799 | At3g15890 | protein kinase, outath similar to some protein kinase family protein                                 | 91   | 117  | 124  | 149  | 158  | 132  | 111  | 146  | 0.76     | 0.048723 | 113  | 114  | 128  | 184  | 140  | 139  | 129  | 141  | 120  | 147  | 0.82     | 0.090560 | 154  | 0.78     | 0.029292 |
| 257800 | At3g15900 | unknown protein . supported by full-len expressed protein                                            | 81   | 143  | 134  | 113  | 120  | 188  | 119  | 107  | 1.12     | 0.594502 | 118  | 140  | 136  | 148  | 138  | 141  | 161  | 163  | 130  | 157  | 0.82     | 0.070153 | 154  | 0.84     | 0.219890 |
| 257801 | At3g18750 | microben activated protein kinase kinase family protein                                              | 257  | 268  | 267  | 268  | 269  | 219  | 216  | 216  | 0.94     | 0.747468 | 225  | 216  | 216  | 225  | 216  | 216  | 225  | 216  | 216  | 225  | 0.94     | 0.747468 | 225  | 0.94     | 0.747468 |
| 257802 | At3g18770 | unknown protein                                                                                      | 41   | 51   | 59   | 61   | 60   | 57   | 50   | 59   | 0.85     | 0.158064 | 53   | 50   | 41   | 38   | 34   | 38   | 34   | 38   | 35   | 0.94 | 0.387671 | 37       | 0.96 | 0.657385 |          |
| 257803 | At3g18790 | unknown protein                                                                                      | 405  | 591  | 548  | 656  | 703  | 588  | 515  | 649  | 0.79     | 0.109956 | 513  | 578  | 593  | 888  | 590  | 594  | 589  | 553  | 561  | 643  | 0.87     | 0.369475 | 691  | 0.81     | 0.271554 |
| 257804 | At3g18810 | protein kinase, outath similar to some protein kinase family protein                                 | 19   | 18   | 24   | 27   | 25   | 20   | 25   | 0.81 | 0.087933 | 14       | 18   | 21   | 17   | 17   | 14   | 21   | 15   | 18   | 17   | 1.04 | 0.740209 | 16       | 1.09 | 0.565625 |          |
| 257805 | At3g18820 | sugar transport . mammalian similar to sugar transport . mammalian similar to                        | 250  | 273  | 273  | 273  | 273  | 188  | 211  | 219  | 0.73     | 0.147462 | 217  | 217  | 217  | 217  | 217  | 217  | 217  | 217  | 217  | 0.73 | 0.147462 | 217      | 0.73 | 0.147462 |          |
| 257806 | At3g18830 | hypothetical protein predicted by venaer ankyrin repeat family protein                               | 50   | 62   | 74   | 86   | 73   | 68   | 73   | 0.84 | 0.287963 | 45       | 46   | 55   | 74   | 61   | 55   | 65   | 51   | 49   | 61   | 0.80 | 0.080635 | 63       | 0.77 | 0.090321 |          |
| 257807 | At3g18870 | hypothetical protein predicted by venaer hypothetical protein                                        | 20   | 23   | 23   | 26   | 24   | 24   | 24   | 23   | 0.94     | 0.318244 | 21   | 20   | 25   | 18   | 16   | 19   | 23   | 19   | 22   | 19   | 1.14     | 0.154659 | 18   | 1.22     | 0.063821 |
| 257808 | At3g18910 | hypothetical protein predicted by venaer U-box domain-containing protein                             | 36   | 61   | 46   | 58   | 65   | 51   | 48   | 58   | 0.83     | 0.302801 | 47   | 42   | 52   | 66   | 49   | 48   | 58   | 50   | 47   | 54   | 0.87     | 0.208503 | 54   | 0.87     | 0.336354 |
| 257809 | At3g18920 | actin 2 identical to GB-AD3709 from actin 2 (ACT2)                                                   | 668  | 688  | 720  | 763  | 642  | 592  | 754  | 739  | 1.02     | 0.883598 | 446  | 508  | 680  | 680  | 655  | 680  | 680  | 680  | 680  | 680  | 0.85     | 0.019145 | 588  | 0.82     | 0.155900 |
| 257810 | At3g18930 | unknown protein                                                                                      | 154  | 209  | 194  | 194  | 209  | 194  | 209  | 194  | 0.95     | 0.474867 | 194  | 209  | 194  | 194  | 194  | 194  | 194  | 194  | 194  | 194  | 0.95     | 0.474867 | 194  | 0.95     | 0.474867 |
| 257811 | At3g18940 | hypothetical protein predicted by venaer VO motif-containing protein                                 | 75   | 88   | 95   | 94   | 91   | 88   | 86   | 94   | 0.92     | 0.303238 | 69   | 86   | 79   | 120  | 92   | 88   | 119  | 112  | 78   | 106  | 0.73     | 0.027042 | 100  | 0.78     | 0.119311 |
| 257812 | At3g18970 | hypothetical protein predicted by venaer F-box family protein                                        | 29   | 39   | 41   | 33   | 39   | 34   | 36   | 36   | 1.02     | 0.872447 | 30   | 37   | 38   | 33   | 32   | 28   | 33   | 30   | 30   | 30   | 1.16     | 0.081004 | 31   | 1.13     | 0.241268 |
| 257813 | At3g18980 | 60S ribosomal protein, putative similar to 60S ribosomal protein L30 (RPL30C)                        | 3132 | 3508 | 3720 | 3806 | 3999 | 3546 | 3454 | 3781 | 0.91     | 0.202414 | 3143 | 3287 | 3488 | 3999 | 3608 | 3124 | 3974 | 3936 | 3336 | 3728 | 0.88     | 0.121668 | 3977 | 0.92     | 0.376371 |
| 257814 | At3g18990 | GTP binding protein, outath similar to GTP-binding protein                                           | 443  | 603  | 584  | 603  | 584  | 603  | 584  | 603  | 0.91     | 0.202414 | 443  | 603  | 584  | 603  | 584  | 603  | 584  | 603  | 584  | 603  | 0.91     | 0.202414 | 443  | 0.91     | 0.202414 |
| 257815 | At3g18990 | unknown protein . supported by full-len ribosomal protein S6 family protein                          | 386  | 521  | 487  | 574  | 629  | 549  | 465  | 584  | 0.80     | 0.063234 | 573  | 622  | 671  | 791  | 716  | 632  | 568  | 540  | 622  | 649  | 0.96     | 0.690103 | 713  | 0.87     | 0.166970 |
| 257816 | At3g18990 | uridine kinase, outath similar to UM ascorbate/oligomate/uridine kinase fam                          | 137  | 220  | 197  | 173  | 183  | 144  | 188  | 167  | 1.13     | 0.156630 | 242  | 261  | 220  | 266  | 240  | 233  | 253  | 232  | 241  | 245  | 0.99     | 0.779462 | 246  | 0.98     | 0.755992 |
| 257817 | At3g18660 | hypothetical protein predicted by venaer oligomate/oligomate/uridine kinase fam                      | 28   | 32   | 38   | 36   | 47   | 36   | 33   | 40   | 0.83     | 0.210469 | 18   | 22   | 21   | 24   | 23   | 22   | 25   | 22   | 21   | 24   | 0.88     | 0.124214 | 24   | 0.88     | 0.203375 |
| 257818 | At3g22860 | sukarvonic transition elongation factor elongation factor Tu family protein                          | 131  | 151  | 151  | 131  | 151  | 131  | 151  | 131  | 0.84     | 0.210469 | 131  | 151  | 131  | 151  | 131  | 151  | 131  | 151  | 131  | 151  | 0.84     | 0.210469 | 131  | 0.84     |          |

|             |           |                                           |                                               |      |      |      |      |      |      |      |      |          |          |      |      |      |      |      |      |      |      |      |      |          |          |      |          |          |
|-------------|-----------|-------------------------------------------|-----------------------------------------------|------|------|------|------|------|------|------|------|----------|----------|------|------|------|------|------|------|------|------|------|------|----------|----------|------|----------|----------|
| 257743_at   | A13g27390 | unknown protein                           | expressed protein                             | 71   | 103  | 106  | 100  | 110  | 73   | 93   | 95   | 0.99     | 0.945561 | 67   | 71   | 68   | 102  | 82   | 78   | 88   | 83   | 69   | 87   | 0.79     | 0.017177 | 88   | 0.78     | 0.065057 |
| 257709_at   | A13g27325 | unknown protein similar to negative re    | expressed protein                             | 56   | 74   | 72   | 96   | 105  | 71   | 68   | 91   | 0.74     | 1.114059 | 32   | 44   | 31   | 29   | 33   | 30   | 37   | 32   | 35   | 32   | 1.10     | 0.432502 | 31   | 1.15     | 0.363468 |
| 257710_at   | A13g27350 | unknown protein : supported by full-len   | expressed protein                             | 234  | 366  | 391  | 243  | 264  | 190  | 230  | 232  | 1.42     | 0.142315 | 171  | 169  | 201  | 242  | 214  | 194  | 197  | 187  | 181  | 204  | 0.88     | 0.193981 | 218  | 0.83     | 0.087130 |
| 257711_at   | A13g27350 | 20S proteasome beta subunit (PBB1)        |                                               | 1030 | 1320 | 1414 | 1364 | 1320 | 1171 | 1010 | 1324 | 0.76     | 0.056943 | 1220 | 1109 | 1383 | 1604 | 1379 | 1222 | 1119 | 1024 | 1139 | 1429 | 0.84     | 0.623492 | 1429 | 0.89     | 0.601436 |
| 257712_at   | A13g27420 | hydroethanol protein predicted by o       | expressed protein                             | 176  | 299  | 302  | 296  | 398  | 308  | 259  | 334  | 0.78     | 0.225767 | 250  | 284  | 305  | 418  | 309  | 343  | 357  | 329  | 280  | 370  | 0.76     | 0.012357 | 387  | 0.72     | 0.017783 |
| 257713_at   | A13g27380 | succinate dehydrogenase iron-prote        | histone H3, putative similar to histone       | 498  | 720  | 622  | 786  | 875  | 652  | 613  | 771  | 0.80     | 0.159263 | 672  | 749  | 712  | 1009 | 785  | 754  | 728  | 702  | 711  | 796  | 0.89     | 0.303860 | 849  | 0.84     | 0.173000 |
| 257714_at   | A13g27360 | histone H3, putative similar to histone   | H3, putative similar to histone               | 461  | 855  | 807  | 969  | 994  | 817  | 775  | 927  | 0.84     | 0.131218 | 529  | 527  | 678  | 803  | 648  | 602  | 678  | 701  | 578  | 704  | 0.82     | 0.146630 | 714  | 0.81     | 0.255972 |
| 257715_at   | A13g27350 | putative zinc transporter (ZIP1)          |                                               | 66   | 70   | 69   | 74   | 66   | 70   | 71   | 1.04 | 0.94     | 0.343899 | 25   | 32   | 30   | 34   | 30   | 28   | 30   | 28   | 30   | 31   | 0.95     | 0.605341 | 107  | 0.92     | 0.879124 |
| 257685_at   | A13g27270 | unknown protein                           | pentateicoacetide (PPR) repeat-containi       | 51   | 60   | 67   | 78   | 85   | 75   | 59   | 0.75 | 0.024115 | 44       | 40   | 53   | 56   | 50   | 52   | 55   | 46   | 46   | 52   | 0.89 | 0.167462 | 53       | 0.87 | 0.194878 |          |
| 257686_at   | A13g27190 | unknown protein similar to iron-oxid      | short-chain dehydrogenase/reductase (S        | 385  | 492  | 387  | 448  | 498  | 386  | 421  | 444  | 0.95     | 0.665404 | 605  | 571  | 563  | 738  | 629  | 519  | 611  | 616  | 580  | 623  | 0.93     | 0.400784 | 629  | 0.92     | 0.482077 |
| 257687_at   | A13g27280 | unknown protein predicted by o            | short-chain dehydrogenase/reductase (S        | 351  | 418  | 459  | 526  | 550  | 441  | 409  | 506  | 0.81     | 0.101955 | 467  | 588  | 526  | 819  | 555  | 447  | 519  | 510  | 527  | 590  | 0.89     | 0.468203 | 640  | 0.82     | 0.303327 |
| 257688_at   | A13g27280 | SMF2-related CBF activator protein, o     | SNF2 domain-containing protein / helica       | 32   | 38   | 27   | 44   | 53   | 39   | 32   | 46   | 0.71     | 0.065911 | 11   | 15   | 14   | 16   | 14   | 11   | 15   | 14   | 13   | 14   | 0.94     | 0.629619 | 13   | 0.98     | 0.880054 |
| 257689_at   | A13g27280 | myb-related protein, putative myb-rela    | myb family transcription factor (MYB10)       | 23   | 24   | 26   | 24   | 23   | 25   | 24   | 24   | 1.02     | 0.272410 | 22   | 30   | 35   | 30   | 22   | 24   | 29   | 27   | 30   | 26   | 1.14     | 0.248953 | 25   | 1.19     | 0.264787 |
| 257690_at   | A13g27280 | unknown protein contains similarly to     | a auxin-responsive family protein             | 75   | 95   | 102  | 88   | 92   | 56   | 91   | 79   | 1.15     | 0.444325 | 97   | 94   | 81   | 117  | 99   | 82   | 114  | 110  | 91   | 104  | 0.87     | 0.188169 | 99   | 0.91     | 0.479413 |
| 257691_at   | A13g27260 | hydrothetical protein predicted by o      | ascorbate oxidase (AAO) family prot           | 25   | 30   | 32   | 35   | 29   | 28   | 30   | 31   | 0.98     | 0.802639 | 26   | 29   | 30   | 28   | 24   | 27   | 32   | 27   | 28   | 27   | 1.03     | 0.714562 | 26   | 1.08     | 0.303485 |
| 257692_at   | A13g27240 | hydrothetical protein contains simila     | rly hydrothetical protein                     | 30   | 37   | 39   | 40   | 45   | 37   | 35   | 41   | 0.86     | 0.208410 | 26   | 25   | 43   | 26   | 28   | 29   | 41   | 32   | 31   | 31   | 1.01     | 0.947691 | 28   | 1.14     | 0.539115 |
| 257693_at   | A13g27240 | hydrothetical protein predicted by o      | ener COP9 signalosome complex-related / C     | 25   | 24   | 26   | 24   | 23   | 25   | 24   | 24   | 1.02     | 0.272410 | 22   | 30   | 35   | 30   | 22   | 24   | 29   | 27   | 30   | 26   | 1.14     | 0.248953 | 25   | 1.19     | 0.264787 |
| 257694_at   | A13g27260 | nucleolar protein, putative nucleolar     | r protein Nop56, putative                     | 283  | 311  | 307  | 311  | 310  | 323  | 300  | 315  | 0.95     | 0.289957 | 377  | 306  | 368  | 390  | 331  | 286  | 382  | 356  | 350  | 349  | 1.00     | 0.963537 | 336  | 1.04     | 0.715961 |
| 257695_at   | A13g27260 | hydrothetical protein contains Pfam pr    | of floral homeotic protein (HUA1)             | 210  | 263  | 249  | 316  | 354  | 290  | 241  | 320  | 0.75     | 0.031980 | 261  | 250  | 275  | 410  | 348  | 269  | 375  | 330  | 262  | 346  | 0.76     | 0.038165 | 342  | 0.77     | 0.124253 |
| 257696_at   | A13g27260 | protein kinase, putative similar to p     | rotein kinase, putative                       | 77   | 95   | 105  | 115  | 121  | 100  | 92   | 112  | 0.82     | 0.127505 | 76   | 75   | 93   | 101  | 89   | 81   | 98   | 91   | 81   | 92   | 0.89     | 0.146798 | 90   | 0.90     | 0.338801 |
| 257697_at   | A13g27200 | hydrothetical protein predicted by o      | ener aspartyl protease family protein         | 211  | 218  | 219  | 175  | 193  | 158  | 216  | 175  | 1.23     | 0.015127 | 250  | 243  | 267  | 281  | 239  | 224  | 248  | 245  | 253  | 248  | 1.02     | 0.670446 | 248  | 1.02     | 0.790054 |
| 257698_at   | A13g27230 | regulatory protein of P-starvation ac     | timy myb family transcription factor          | 32   | 32   | 35   | 44   | 50   | 41   | 33   | 45   | 0.74     | 0.012569 | 38   | 42   | 45   | 78   | 70   | 64   | 69   | 65   | 42   | 69   | 0.60     | 0.002623 | 71   | 0.59     | 0.003029 |
| 257699_at   | A13g27280 | othoschoovertate kinase, putative         | acidic simi phosphoglycerate kinase, putative | 543  | 728  | 635  | 817  | 885  | 696  | 635  | 800  | 0.79     | 0.098809 | 673  | 589  | 661  | 991  | 819  | 705  | 916  | 909  | 641  | 868  | 0.74     | 0.015797 | 838  | 0.77     | 0.086444 |
| 257700_at   | A13g27240 | unknown protein similar to unknown        | r LEM3 (ligand-effector modulator 3) fami     | 754  | 1064 | 1104 | 1083 | 1136 | 974  | 974  | 1064 | 0.92     | 0.494545 | 1045 | 1120 | 1099 | 1461 | 1184 | 1086 | 1257 | 1265 | 1088 | 1251 | 0.87     | 0.100955 | 1243 | 0.88     | 0.246674 |
| 257701_at   | A13g27210 | unknown protein contains similarly to     | 3-methyladenine glycosylase family prote      | 267  | 461  | 280  | 625  | 661  | 405  | 336  | 564  | 0.60     | 0.088420 | 166  | 188  | 210  | 458  | 353  | 352  | 278  | 267  | 188  | 341  | 0.55     | 0.016434 | 388  | 0.48     | 0.005979 |
| 257702_at   | A13g27670 | CTP-synthetase, putative similar to       | CT CTP synthetase, putative / UTP--ammon      | 485  | 566  | 629  | 640  | 661  | 538  | 560  | 613  | 0.91     | 0.401151 | 519  | 408  | 501  | 588  | 395  | 552  | 510  | 476  | 509  | 603  | 0.524076 | 494      | 0.96 | 0.796697 |          |
| 257703_at   | A13g27640 | unknown protein : supported by full-len   | RNA recognition motif (RRM)-containin         | 234  | 278  | 311  | 306  | 343  | 253  | 274  | 301  | 0.91     | 0.482296 | 222  | 197  | 227  | 278  | 250  | 205  | 245  | 237  | 215  | 243  | 0.89     | 0.154392 | 244  | 0.88     | 0.279881 |
| 257704_at   | A13g27220 | myb-related transcription factor, puta    | tive myb family transcription factor          | 18   | 14   | 21   | 16   | 24   | 22   | 18   | 21   | 0.86     | 0.404810 | 15   | 11   | 18   | 14   | 18   | 13   | 18   | 16   | 15   | 16   | 0.93     | 0.602338 | 15   | 0.98     | 0.912865 |
| 257705_at   | A13g27260 | unknown protein : supported by cDNA       | -expressed protein                            | 1428 | 1915 | 2103 | 1808 | 2082 | 1640 | 1815 | 1843 | 0.98     | 0.512242 | 1783 | 1980 | 1904 | 2381 | 2041 | 1857 | 1945 | 1902 | 1889 | 2025 | 0.93     | 0.341248 | 2083 | 0.90     | 0.280537 |
| 257706_at   | A13g27260 | Expressed protein : supported by cDNA     | -expressed protein                            | 54   | 82   | 86   | 79   | 77   | 70   | 74   | 82   | 0.78     | 0.043736 | 71   | 87   | 87   | 107  | 89   | 82   | 110  | 89   | 92   | 79   | 0.82     | 0.378980 | 96   | 0.86     | 0.222843 |
| 257707_at   | A13g27260 | hydrothetical protein predicted by o      | ener expressed protein                        | 533  | 769  | 799  | 799  | 838  | 647  | 701  | 761  | 0.92     | 0.583834 | 662  | 635  | 658  | 981  | 703  | 714  | 835  | 821  | 652  | 829  | 0.79     | 0.025719 | 829  | 0.79     | 0.089162 |
| 257708_at   | A13g27260 | hydrothetical protein predicted by o      | ener expressed protein                        | 342  | 440  | 414  | 461  | 500  | 365  | 398  | 442  | 0.90     | 0.532651 | 271  | 226  | 293  | 362  | 311  | 271  | 322  | 327  | 263  | 319  | 0.83     | 0.061718 | 315  | 0.84     | 0.192181 |
| 257709_at   | A13g27260 | hydrothetical protein predicted by o      | ener hydrothetical protein                    | 10   | 12   | 13   | 13   | 12   | 12   | 12   | 12   | 0.94     | 0.553110 | 8    | 8    | 9    | 8    | 10   | 12   | 8    | 9    | 8    | 9    | 0.90     | 0.400345 | 10   | 0.84     | 0.248344 |
| 257710_at   | A13g27260 | hydrothetical protein predicted by o      | ener hydrothetical protein                    | 6    | 6    | 6    | 5    | 4    | 6    | 5    | 5    | 0.97     | 0.61     | 4    | 5    | 4    | 4    | 6    | 3    | 6    | 4    | 4    | 1.00 | 0.996452 | 4        | 1.03 | 0.916961 |          |
| 257683_at   | A13g27280 | hydrothetical protein predicted by o      | ener expressed protein                        | 17   | 20   | 19   | 23   | 26   | 20   | 19   | 23   | 0.81     | 0.100783 | 19   | 17   | 24   | 24   | 28   | 25   | 22   | 21   | 20   | 24   | 0.84     | 0.155110 | 25   | 0.78     | 0.110663 |
| 257684_s_at | A13g27290 | unknown protein contains Pfam profil      | e transducin family protein / WD-40 repeat    | 752  | 855  | 855  | 1004 | 1121 | 807  | 821  | 977  | 0.84     | 0.183640 | 646  | 548  | 680  | 783  | 731  | 558  | 761  | 720  | 625  | 711  | 0.88     | 0.203292 | 691  | 0.90     | 0.447407 |
| 257653_at   | A13g27225 | hydrothetical protein                     | WW domain-containing protein                  | 87   | 115  | 119  | 123  | 130  | 103  | 107  | 119  | 0.90     | 0.413735 | 75   | 71   | 76   | 82   | 77   | 87   | 84   | 74   | 74   | 77   | 0.97     | 0.545459 | 75   | 0.98     | 0.816362 |
| 257654_at   | A13g27225 | DnaJ protein, putative contains Pfam      | J DnaJ heat shock 70 kDa protein domain-co    | 151  | 273  | 333  | 405  | 489  | 230  | 266  | 405  | 0.66     | 0.051200 | 299  | 367  | 468  | 385  | 352  | 362  | 342  | 309  | 335  | 362  | 0.82     | 0.374542 | 368  | 0.78     | 0.290491 |
| 257655_at   | A13g27350 | unknown protein contains Pfam profil      | e high mobility group (HMG1/2) family pro     | 86   | 122  | 139  | 123  | 143  | 115  | 116  | 127  | 0.91     | 0.559986 | 118  | 163  | 144  | 197  | 148  | 137  | 158  | 160  | 142  | 160  | 0.89     | 0.308104 | 161  | 0.88     | 0.430071 |
| 257656_at   | A13g27328 | Expressed protein : supported by full-len | zinc finger (C3HC4-type RING finger) fa       | 22   | 22   | 27   | 29   | 27   | 24   | 24   | 27   | 0.90     | 0.284748 | 17   | 16   | 22   | 20   | 17   | 15   | 19   | 16   | 18   | 17   | 1.07     | 0.559274 | 17   | 1.08     | 0.620200 |
| 257657_at   | A13g27325 | Expressed protein : supported by full-len | ubiquitin family protein                      | 426  | 557  | 533  | 614  | 738  | 570  | 505  | 640  | 0.79     | 0.104648 | 435  | 405  | 433  | 534  | 498  | 435  | 498  | 477  | 425  | 488  | 0.87     | 0.029989 | 489  | 0.87     | 0.099678 |
| 257658_at   | A13g27320 | unknown protein : supported by full-len   | expressed protein                             | 490  | 541  | 600  | 638  | 644  | 564  | 544  | 616  | 0.88     | 0.154022 | 607  | 670  | 663  | 880  | 707  | 691  | 807  | 646  | 746  | 881  | 0.87     | 0.263080 | 880  | 0.82     | 0.221099 |
| 257659_at   | A13g27320 | Expressed protein : supported by full-len | regulatory protein RecX family protein        | 289  | 385  | 381  | 422  | 480  | 378  | 352  | 427  | 0.82     | 0.157911 | 472  | 388  | 441  | 636  | 428  | 441  | 636  | 428  | 441  | 636  | 0.82     | 0.119417 | 609  | 0.78     | 0.100029 |
| 257660_at   | A13g27360 | unknown protein : supported by cDNA       | -expressed protein                            | 262  | 284  | 290  | 313  | 253  | 241  | 285  | 84   | 0.94     | 0.190328 | 186  | 211  | 232  | 280  | 238  | 192  | 251  | 258  | 210  | 244  | 0.86     | 0.271124 | 236  | 0.89     | 0.405346 |
| 257661_at   | A13g27340 | unknown protein contains Pfam profil      | e WD-40 repeat family protein                 | 269  | 389  | 370  | 416  | 440  | 327  | 342  | 395  | 0.87     | 0.362185 | 331  | 331  | 320  | 431  | 359  | 325  | 392  | 355  | 327  | 372  | 0.88     | 0.112981 | 372  | 0.88     | 0.232340 |
| 257662_at   | A13g27320 | low affinity calcium antidiporter CA      | X2 air calcium exchanger (CAEX2)              | 259  | 205  | 255  | 271  | 265  | 244  | 219  | 260  | 0.84     | 0.106289 | 197  | 189  | 215  | 294  | 224  | 210  | 222  | 224  | 200  | 235  | 0.85     | 0.149737 | 243  | 0.83     | 0.194484 |
| 257663_at   | A13g27260 | hydrothetical protein predicted by o      | ener expressed protein                        | 384  | 438  | 456  | 568  | 666  | 348  | 547  |      |          |          |      |      |      |      |      |      |      |      |      |      |          |          |      |          |          |

|             |          |                                                                                    |      |      |      |      |      |      |      |          |          |          |      |      |      |      |      |      |      |      |          |      |          |          |          |          |          |          |
|-------------|----------|------------------------------------------------------------------------------------|------|------|------|------|------|------|------|----------|----------|----------|------|------|------|------|------|------|------|------|----------|------|----------|----------|----------|----------|----------|----------|
| 257620_at   | A3g24850 | hypothetical protein predicted by genei hypothetical protein                       | 28   | 34   | 40   | 40   | 36   | 44   | 34   | 40       | 0.84     | 0.188342 | 17   | 19   | 26   | 21   | 19   | 30   | 22   | 21   | 22       | 0.94 | 0.716270 | 20       | 1.07     | 0.654511 |          |          |
| 257590_s_at | A3g24870 | hypothetical protein predicted by genei expressed protein                          | 172  | 233  | 243  | 259  | 311  | 208  | 216  | 259      | 0.83     | 0.308370 | 120  | 115  | 128  | 170  | 145  | 119  | 142  | 136  | 121      | 142  | 0.85     | 0.106896 | 145      | 0.84     | 0.191996 |          |
| 257591_at   | A3g24900 | leucine-rich repeat disease resistance disease resistance family protein / LRR1    | 25   | 25   | 31   | 27   | 29   | 30   | 27   | 28       | 0.96     | 0.811259 | 18   | 21   | 24   | 19   | 16   | 21   | 18   | 15   | 18       | 1.15 | 0.184515 | 18       | 1.17     | 0.216535 |          |          |
| 257592_at   | A3g24950 | leucine-rich repeat disease resistance disease resistance family protein / LRR1    | 32   | 41   | 38   | 35   | 46   | 38   | 34   | 40       | 0.86     | 0.232693 | 22   | 21   | 29   | 24   | 26   | 21   | 26   | 21   | 26       | 0.93 | 0.407085 | 25       | 0.91     | 0.160899 |          |          |
| 257593_at   | A3g24840 | phosphatidylinositol transfer protein, cl SEC14 cytosolic factor, putative / phoso | 32   | 41   | 47   | 49   | 47   | 38   | 40   | 45       | 0.90     | 0.450371 | 40   | 31   | 34   | 37   | 33   | 30   | 29   | 33   | 35       | 32   | 1.08     | 0.367642 | 33       | 1.05     | 0.635544 |          |
| 257594_at   | A3g24740 | unknown protein                                                                    | 223  | 321  | 348  | 313  | 395  | 253  | 297  | 321      | 0.93     | 0.700096 | 271  | 289  | 265  | 368  | 333  | 311  | 318  | 303  | 275      | 327  | 0.84     | 0.018902 | 337      | 0.81     | 0.026765 |          |
| 257595_at   | A3g24750 | hypothetical protein predicted by genei expressed protein                          | 24   | 22   | 25   | 21   | 27   | 23   | 24   | 24       | 1.00     | 0.992267 | 121  | 177  | 18   | 15   | 18   | 19   | 18   | 18   | 19       | 18   | 1.03     | 0.688455 | 17       | 1.05     | 0.637747 |          |
| 257596_at   | A3g24760 | unknown protein                                                                    | 124  | 174  | 167  | 199  | 167  | 189  | 203  | 178      | 1.05     | 0.414041 | 152  | 167  | 171  | 185  | 177  | 165  | 172  | 171  | 165      | 183  | 1.17     | 0.146319 | 168      | 0.91     | 0.195777 |          |
| 257597_at   | A3g24790 | protein kinase, autotable similar to crotle protein kinase family protein          | 22   | 28   | 29   | 28   | 27   | 24   | 26   | 26       | 1.00     | 0.983385 | 23   | 28   | 30   | 26   | 20   | 21   | 26   | 20   | 27       | 23   | 1.19     | 0.120553 | 22       | 1.22     | 0.153965 |          |
| 257598_at   | A3g24800 | PRT1 identical to GB-CAA11891 from PRT1 protein (PRT1)                             | 165  | 205  | 230  | 254  | 254  | 216  | 200  | 241      | 0.83     | 0.141782 | 207  | 237  | 241  | 302  | 240  | 219  | 269  | 248  | 228      | 255  | 0.89     | 0.235859 | 254      | 0.90     | 0.401595 |          |
| 257599_at   | A3g24830 | 60S ribosomal protein, putative similar 60S ribosomal protein L13A (RPL13aB)       | 3679 | 4208 | 4063 | 4238 | 4380 | 3926 | 3950 | 4181     | 0.94     | 0.375190 | 3713 | 3661 | 3787 | 4556 | 3844 | 3519 | 4022 | 3961 | 3720     | 3988 | 0.93     | 0.276460 | 3986     | 0.93     | 0.434201 |          |
| 257600_at   | A3g24770 | hypothetical protein predicted by genei CLS41, putative                            | 378  | 313  | 116  | 157  | 160  | 132  | 108  | 148      | 0.72     | 0.627699 | 175  | 185  | 182  | 245  | 205  | 207  | 175  | 168  | 181      | 200  | 0.80     | 0.330849 | 219      | 0.83     | 0.045239 |          |
| 257601_at   | A3g24820 | hypothetical protein predicted by genei SSD domain-containing protein              | 132  | 103  | 118  | 106  | 137  | 103  | 96   | 115      | 0.83     | 0.308090 | 118  | 125  | 130  | 178  | 158  | 147  | 129  | 132  | 124      | 149  | 0.84     | 0.090811 | 161      | 0.77     | 0.019743 |          |
| 257602_at   | A3g13800 | hydrolase, putative similar to Metal De metallo-beta-lactamase family protein      | 101  | 142  | 140  | 138  | 160  | 130  | 128  | 143      | 0.89     | 0.398572 | 121  | 132  | 141  | 184  | 133  | 148  | 138  | 140  | 146      | 131  | 148      | 0.89     | 0.266983 | 155      | 0.85     | 0.223185 |
| 257603_at   | A3g13820 | unknown protein                                                                    | 33   | 27   | 43   | 31   | 31   | 40   | 34   | 34       | 1.01     | 0.933124 | 21   | 16   | 26   | 21   | 22   | 16   | 20   | 22   | 21       | 20   | 1.05     | 0.675911 | 20       | 1.08     | 0.658506 |          |
| 257604_s_at | A3g13830 | hypothetical protein predicted by genei F-box family protein                       | 7    | 10   | 6    | 8    | 8    | 8    | 7    | 1.05     | 0.767647 | 5        | 4    | 7    | 5    | 5    | 5    | 6    | 7    | 5    | 6        | 0.94 | 0.718174 | 5        | 1.05     | 0.790976 |          |          |
| 257605_at   | A3g13840 | Expressed protein, supported by full-length expressed protein                      | 213  | 289  | 327  | 338  | 389  | 315  | 276  | 348      | 0.79     | 0.140572 | 284  | 333  | 332  | 432  | 335  | 311  | 285  | 301  | 316      | 333  | 0.95     | 0.673654 | 359      | 0.88     | 0.340940 |          |
| 257606_at   | A3g13870 | root hair defective 3 (RHD3) identical 1 root hair defective 3 (RHD3)              | 335  | 434  | 433  | 473  | 520  | 367  | 401  | 453      | 0.89     | 0.405446 | 257  | 244  | 318  | 385  | 328  | 245  | 301  | 305  | 273      | 313  | 0.87     | 0.290445 | 319      | 0.86     | 0.379666 |          |
| 257607_at   | A3g13880 | hypothetical protein predicted by genei pentapeptide (PPR) repeat-containing       | 59   | 84   | 74   | 84   | 102  | 82   | 72   | 89       | 0.81     | 0.154108 | 58   | 71   | 73   | 66   | 65   | 64   | 76   | 67   | 68       | 68   | 1.00     | 0.993935 | 65       | 1.04     | 0.620970 |          |
| 257608_at   | A3g13860 | chaperonin, putative similar to CHAPE chaperonin, putative                         | 588  | 684  | 832  | 775  | 886  | 755  | 695  | 805      | 0.86     | 0.251531 | 471  | 360  | 479  | 542  | 408  | 425  | 515  | 528  | 436      | 498  | 0.88     | 0.171451 | 482      | 0.91     | 0.421133 |          |
| 257609_at   | A3g13845 | Expressed protein, supported by full-length expressed protein                      | 311  | 389  | 327  | 338  | 389  | 315  | 276  | 348      | 0.79     | 0.140572 | 284  | 333  | 332  | 432  | 335  | 311  | 285  | 301  | 316      | 333  | 0.95     | 0.673654 | 359      | 0.88     | 0.340940 |          |
| 257610_at   | A3g13810 | zinc finger protein, putative similar to fi zinc finger (C2H2 type) family protein | 70   | 108  | 94   | 141  | 137  | 125  | 91   | 134      | 0.67     | 0.021639 | 170  | 169  | 195  | 251  | 198  | 175  | 197  | 198  | 178      | 204  | 0.87     | 0.205116 | 208      | 0.86     | 0.284369 |          |
| 257611_at   | A3g26580 | unknown protein                                                                    | 393  | 579  | 703  | 636  | 807  | 494  | 558  | 646      | 0.86     | 0.529943 | 644  | 706  | 572  | 756  | 661  | 685  | 812  | 773  | 641      | 738  | 0.87     | 0.083811 | 701      | 0.91     | 0.277559 |          |
| 257612_at   | A3g26800 | unknown protein                                                                    | 147  | 217  | 214  | 228  | 259  | 184  | 192  | 224      | 0.86     | 0.380249 | 150  | 144  | 176  | 217  | 206  | 168  | 180  | 179  | 157      | 190  | 0.83     | 0.083652 | 196      | 0.80     | 0.097127 |          |
| 257613_at   | A3g26610 | polygalacturonase, putative similar to polygalacturonase, putative / pectinase,    | 58   | 78   | 82   | 90   | 78   | 78   | 73   | 82       | 0.59     | 0.322934 | 48   | 62   | 64   | 90   | 71   | 60   | 78   | 68   | 58       | 73   | 0.80     | 0.101560 | 73       | 0.79     | 0.220107 |          |
| 257614_at   | A3g26614 | putative non-LTR retroelement reverse non-LTR retrotransposon family (LINE)        | 53   | 70   | 70   | 71   | 67   | 64   | 69   | 0.92     | 0.396915 | 43       | 58   | 59   | 69   | 44   | 47   | 54   | 59   | 53   | 55       | 0.97 | 0.849735 | 53       | 1.00     | 0.986534 |          |          |
| 257615_at   | A3g26510 | unknown protein                                                                    | 413  | 758  | 605  | 330  | 418  | 228  | 592  | 325      | 1.82     | 0.079539 | 509  | 616  | 457  | 505  | 427  | 407  | 482  | 431  | 527      | 450  | 1.17     | 0.117965 | 446      | 1.18     | 0.218718 |          |
| 257616_at   | A3g26540 | hypothetical protein contains Pfam orof pentapeptide (PPR) repeat-containing       | 50   | 61   | 75   | 78   | 82   | 82   | 62   | 81       | 0.77     | 0.057333 | 39   | 42   | 50   | 57   | 45   | 41   | 47   | 43   | 43       | 47   | 0.93     | 0.498997 | 48       | 0.91     | 0.514344 |          |
| 257617_at   | A3g26550 | hypothetical protein                                                               | 25   | 15   | 25   | 23   | 23   | 26   | 22   | 24       | 0.91     | 0.571271 | 18   | 17   | 24   | 21   | 20   | 21   | 17   | 25   | 20       | 21   | 0.95     | 0.652078 | 20       | 0.95     | 0.694677 |          |
| 257618_at   | A3g26560 | ATP-dependent RNA helicase, putative                                               | 465  | 431  | 580  | 512  | 436  | 512  | 445  | 512      | 0.86     | 0.041929 | 280  | 295  | 326  | 338  | 306  | 326  | 340  | 376  | 326      | 340  | 0.96     | 0.142939 | 349      | 0.91     | 0.015295 |          |
| 257619_at   | A3g26570 | phosphate transporter, putative cationic phosphate transporter family protein      | 416  | 551  | 371  | 591  | 512  | 443  | 512  | 445      | 0.87     | 0.042115 | 459  | 411  | 563  | 864  | 641  | 460  | 697  | 649  | 478      | 662  | 0.72     | 0.091356 | 655      | 0.73     | 0.228633 |          |
| 257620_at   | A3g26595 | Expressed protein, supported by full-length expressed protein                      | 47   | 59   | 47   | 46   | 50   | 52   | 48   | 1.03     | 0.312920 | 48       | 48   | 45   | 44   | 45   | 44   | 57   | 49   | 47   | 49       | 47   | 0.96     | 0.594941 | 46       | 1.02     | 0.625997 |          |
| 257621_at   | A3g26520 | gamma ionolipid intrinsic protein, putative                                        | 330  | 628  | 448  | 360  | 499  | 285  | 469  | 381      | 1.29     | 0.459409 | 441  | 177  | 127  | 344  | 229  | 230  | 213  | 191  | 148      | 241  | 0.62     | 0.046261 | 267      | 0.55     | 0.043946 |          |
| 257622_at   | A3g26590 | internal membrane protein, putative co MATE efflux family protein                  | 94   | 124  | 145  | 145  | 124  | 127  | 0.84 | 0.685343 | 128      | 106      | 136  | 127  | 180  | 153  | 162  | 159  | 123  | 176  | 109      | 127  | 0.70     | 0.039956 | 187      | 0.66     | 0.052266 |          |
| 257623_at   | A3g30775 | proline oxidase, mitochondrial, putative                                           | 1461 | 2385 | 3048 | 1703 | 2141 | 1426 | 2298 | 1756     | 1.31     | 0.343988 | 1086 | 1175 | 923  | 1414 | 1595 | 1034 | 1195 | 1172 | 1061     | 1282 | 0.83     | 0.173211 | 1348     | 0.79     | 0.188862 |          |
| 257624_at   | A3g30750 | hypothetical protein predicted by genei hypothetical protein                       | 6    | 6    | 8    | 7    | 8    | 7    | 8    | 0.86     | 0.145091 | 4        | 8    | 5    | 5    | 6    | 9    | 8    | 5    | 6    | 5        | 6    | 0.73     | 0.509133 | 7        | 0.83     | 0.575233 |          |
| 257625_at   | A3g30190 | hypothetical protein predicted by genei hypothetical protein                       | 10   | 13   | 11   | 12   | 12   | 13   | 11   | 12       | 0.94     | 0.525091 | 8    | 10   | 10   | 10   | 13   | 10   | 11   | 9    | 9        | 11   | 0.90     | 0.356632 | 11       | 0.86     | 0.327132 |          |
| 257626_at   | A3g30220 | hypothetical protein predicted by genei hypothetical protein                       | 21   | 21   | 28   | 28   | 27   | 23   | 28   | 0.83     | 0.102654 | 21       | 26   | 27   | 28   | 25   | 24   | 25   | 24   | 1.01 | 0.697280 | 24   | 0.82     | 0.072960 | 24       | 0.82     | 0.072960 |          |
| 257627_at   | A3g30230 | hypothetical protein predicted by genei myosin heavy chain-related                 | 18   | 19   | 29   | 24   | 27   | 27   | 22   | 26       | 0.84     | 0.289578 | 16   | 19   | 22   | 22   | 15   | 21   | 21   | 16   | 19       | 19   | 0.98     | 0.984541 | 19       | 0.98     | 0.873174 |          |
| 257628_at   | A3g30240 | hypothetical protein predicted by genei hypothetical protein                       | 35   | 42   | 50   | 54   | 82   | 47   | 42   | 61       | 0.69     | 0.176439 | 39   | 35   | 40   | 42   | 44   | 41   | 47   | 42   | 38       | 43   | 0.88     | 0.020751 | 43       | 0.89     | 0.060177 |          |
| 257629_at   | A3g30250 | hypothetical protein predicted by genei hypothetical protein                       | 24   | 21   | 27   | 26   | 21   | 31   | 24   | 26       | 0.94     | 0.672990 | 15   | 24   | 24   | 22   | 14   | 15   | 23   | 20   | 21       | 19   | 1.14     | 0.454268 | 17       | 1.26     | 0.326241 |          |
| 257630_at   | A3g30200 | hypothetical protein contains regions s pseudogene, putative                       | 58   | 79   | 71   | 119  | 101  | 74   | 69   | 88       | 0.71     | 0.116883 | 70   | 89   | 68   | 86   | 76   | 89   | 100  | 100  | 100      | 100  | 0.85     | 0.317836 | 77       | 0.99     | 0.928818 |          |
| 257631_at   | A3g30210 | myb-like transcription factor, putative c myb family transcription factor (MYB121  | 82   | 148  | 115  | 85   | 121  | 101  | 107  | 0.85     | 0.841867 | 44       | 42   | 50   | 47   | 49   | 45   | 34   | 61   | 42   | 60       | 47   | 0.96     | 0.028923 | 42       | 1.13     | 0.051295 |          |
| 257632_at   | A3g28120 | unknown protein                                                                    | 10   | 10   | 10   | 9    | 13   | 11   | 10   | 11       | 0.91     | 0.486321 | 9    | 11   | 11   | 6    | 8    | 9    | 10   | 6    | 10       | 7    | 1.36     | 0.064856 | 7        | 1.37     | 0.078390 |          |
| 257633_at   | A3g28150 | hypothetical protein predicted by genei expressed protein                          | 35   | 41   | 43   | 49   | 47   | 42   | 40   | 46       | 0.86     | 0.120943 | 38   | 35   | 33   | 43   | 34   | 36   | 40   | 33   | 35       | 37   | 0.95     | 0.466841 | 38       | 0.94     | 0.478271 |          |
| 257634_at   | A3g28020 | hypothetical protein predicted by genei hypothetical protein                       | 56   | 68   | 82   | 77   | 92   | 80   | 69   | 83       | 0.83     | 0.188116 | 50   | 58   | 70   | 60   | 60   | 55   | 65   | 50   | 59       | 58   | 1.02     | 0.807239 | 58       | 1.02     | 0.859863 |          |
| 257635_at   | A3g28040 | hypothetical protein contains Pfam profile leucine-rich repeat transmembrane orof  | 264  | 268  | 294  | 265  | 288  | 264  | 266  | 294      | 0.92     | 0.353226 | 217  | 197  | 233  | 263  | 268  | 223  | 217  | 254  | 216      | 223  | 0.80     | 0.091223 | 271      | 0.79     | 0.146752 |          |
| 257636_at   | A3g28155 | hypothetical protein predicted by genei hypothetical protein                       | 11   | 11   | 11   | 11   | 13   | 12   | 11   | 12       | 0.91     | 0.207420 | 8    | 8    | 10   | 8    | 9    | 5    | 11   | 16   | 9        | 10   | 0.91     | 0.741634 | 7        | 1.22     | 0.231928 |          |
| 257637_at   | A3g28050 | unknown protein, supported by full-length nucleolin MN21 family protein            | 347  | 442  | 433  | 849  | 836  | 704  | 408  | 797      | 0.51     | 0.002151 | 449  |      |      |      |      |      |      |      |          |      |          |          |          |          |          |          |

|             |           |                                                                                     |      |      |      |      |      |      |      |      |          |            |      |      |      |      |      |      |      |      |      |      |      |          |          |      |          |          |
|-------------|-----------|-------------------------------------------------------------------------------------|------|------|------|------|------|------|------|------|----------|------------|------|------|------|------|------|------|------|------|------|------|------|----------|----------|------|----------|----------|
| 257258_at   | A13g22040 | hypothetical protein contains Pfam pro receptor-like protein kinase-related         | 27   | 36   | 42   | 33   | 35   | 36   | 35   | 35   | 1.00     | 0.970115   | 28   | 27   | 30   | 32   | 29   | 29   | 32   | 28   | 28   | 30   | 0.95 | 0.294868 | 30       | 0.95 | 0.319556 |          |
| 257259_at   | A13g22090 | hypothetical protein predicted by gene expressed protein                            | 6    |      | 6    | 12   | 11   | 9    | 8    | 8    | 1.00     | 0.85516005 | 11   | 12   | 11   | 9    | 6    | 7    | 12   | 9    | 11   | 9    | 1.29 | 0.097442 | 7        | 1.51 | 0.016021 |          |
| 257260_at   | A13g22104 | hypothetical protein predicted by c1er photoactive-resonantive NPH3 protein-rei     | 140  | 184  | 231  | 185  | 185  | 184  | 185  | 185  | 1.00     | 0.993831   | 128  | 124  | 155  | 139  | 101  | 121  | 183  | 164  | 135  | 142  | 0.96 | 0.772694 | 120      | 1.13 | 0.362574 |          |
| 257261_s_at | A13g22104 | hypothetical protein predicted by c1er photoactive-resonantive NPH3 protein-rei     | 35   | 44   | 35   | 39   | 37   | 41   | 34   | 39   | 0.89     | 0.059033   | 31   | 31   | 30   | 31   | 28   | 31   | 28   | 31   | 24   | 28   | 1.11 | 0.521870 | 25       | 1.24 | 0.051822 |          |
| 257262_at   | A13g21890 | zinc finger protein, putative contains Pfam zinc finger (B-box type) family protein | 63   | 83   | 94   | 133  | 117  | 132  | 80   | 127  | 0.63     | 0.010485   | 55   | 50   | 69   | 130  | 88   | 77   | 72   | 77   | 58   | 89   | 0.65 | 0.078963 | 98       | 0.59 | 0.076306 |          |
| 257263_at   | A13g22070 | unknown protein : supported by full-len prole-rich family protein                   | 66   | 63   | 73   | 78   | 102  | 65   | 67   | 82   | 0.82     | 0.279741   | 59   | 49   | 64   | 108  | 97   | 81   | 74   | 77   | 57   | 87   | 0.66 | 0.017106 | 95       | 0.60 | 0.012402 |          |
| 257264_at   | A13g22060 | hypothetical protein contains Pfam pro receptor protein kinase-related              | 19   | 18   | 33   | 23   | 26   | 33   | 23   | 27   | 0.85     | 0.518696   | 12   | 10   | 19   | 16   | 12   | 16   | 18   | 14   | 13   | 15   | 0.88 | 0.464029 | 15       | 0.91 | 0.698481 |          |
| 257265_at   | A13g14880 | hypothetical protein predicted by PHD finger transcription factor, putative         | 223  | 207  | 214  | 243  | 243  | 208  | 217  | 209  | 1.00     | 0.944330   | 143  | 194  | 117  | 166  | 135  | 118  | 162  | 174  | 178  | 142  | 0.98 | 0.068182 | 164      | 0.92 | 0.165152 |          |
| 257266_at   | A13g15010 | RNA-binding protein contains Pfam on RNA recognition motif (RRM)-containing         | 297  | 301  | 299  | 510  | 498  | 481  | 299  | 407  | 0.60     | 0.000020   | 273  | 266  | 377  | 593  | 441  | 368  | 390  | 371  | 305  | 433  | 0.71 | 0.086602 | 467      | 0.65 | 0.099146 |          |
| 257267_at   | A13g15030 | unknown protein similar to TCP3 GB-A1 TCP family transcription factor, putative     | 75   | 84   | 92   | 104  | 127  | 113  | 84   | 115  | 0.73     | 0.019590   | 58   | 52   | 69   | 71   | 65   | 50   | 63   | 61   | 60   | 62   | 0.97 | 0.738499 | 62       | 0.97 | 0.812577 |          |
| 257233_at   | A13g15050 | hypothetical protein similar to SF16 oer calmodulin-binding family protein          | 32   | 33   | 41   | 35   | 51   | 35   | 35   | 41   | 0.87     | 0.421843   | 26   | 27   | 28   | 32   | 28   | 26   | 29   | 32   | 27   | 29   | 0.92 | 0.205630 | 28       | 0.95 | 0.468499 |          |
| 257234_at   | A13g14880 | hypothetical protein predicted by c1er DNA-binding protein-related                  | 44   | 44   | 72   | 68   | 63   | 62   | 54   | 63   | 0.83     | 0.320833   | 32   | 26   | 36   | 31   | 32   | 30   | 31   | 35   | 31   | 32   | 0.99 | 0.863975 | 31       | 1.02 | 0.862968 |          |
| 257235_at   | A13g15060 | ras-related GTP-binding protein contain Ras-related GTP-binding family protein      | 96   | 98   | 91   | 85   | 89   | 75   | 95   | 85   | 0.83     | 0.114      | 87   | 84   | 91   | 115  | 77   | 69   | 68   | 83   | 85   | 79   | 1.08 | 0.623369 | 87       | 0.98 | 0.862426 |          |
| 257236_at   | A13g15095 | hypothetical protein expressed protein                                              | 369  | 552  | 490  | 873  | 934  | 725  | 470  | 844  | 0.56     | 0.010400   | 576  | 669  | 627  | 951  | 727  | 644  | 926  | 820  | 624  | 814  | 0.77 | 0.055861 | 774      | 0.81 | 0.191874 |          |
| 257237_at   | A13g14890 | DNA nick sensor, putative contains Pif phosphatase                                  | 308  | 349  | 338  | 473  | 476  | 407  | 332  | 452  | 0.73     | 0.009354   | 235  | 186  | 256  | 317  | 243  | 223  | 248  | 234  | 225  | 253  | 0.89 | 0.341579 | 261      | 0.86 | 0.371103 |          |
| 257207_at   | A13g14900 | hypothetical protein predicted by c1er expressed protein                            | 58   | 76   | 76   | 87   | 96   | 73   | 70   | 85   | 0.82     | 0.158431   | 55   | 40   | 52   | 60   | 49   | 47   | 59   | 54   | 49   | 54   | 0.91 | 0.370416 | 52       | 0.95 | 0.670991 |          |
| 257208_at   | A13g14910 | hypothetical protein predicted by c1er expressed protein                            | 108  | 128  | 115  | 126  | 156  | 131  | 116  | 138  | 0.84     | 0.126888   | 136  | 139  | 149  | 182  | 139  | 154  | 140  | 142  | 161  | 161  | 0.88 | 0.155335 | 168      | 0.84 | 0.150561 |          |
| 257209_at   | A13g14920 | hypothetical protein expressed protein                                              | 145  | 147  | 173  | 179  | 185  | 144  | 155  | 170  | 0.91     | 0.401588   | 114  | 120  | 133  | 154  | 134  | 107  | 141  | 142  | 122  | 135  | 0.90 | 0.280316 | 131      | 0.93 | 0.557041 |          |
| 257210_at   | A13g14950 | hypothetical protein tetraoctapeptide repeat (TPR)-containing                       | 16   | 17   | 16   | 16   | 19   | 18   | 16   | 16   | 0.91     | 0.217887   | 17   | 19   | 24   | 13   | 15   | 12   | 17   | 15   | 20   | 14   | 1.42 | 0.017888 | 13       | 1.52 | 0.034821 |          |
| 257211_at   | A13g15080 | exonuclease, putative contains Pfam x exonuclease family protein                    | 16   | 17   | 10   | 19   | 206  | 228  | 175  | 174  | 0.23     | 0.180032   | 197  | 224  | 230  | 304  | 260  | 245  | 210  | 203  | 217  | 244  | 0.89 | 0.322154 | 270      | 0.80 | 0.062681 |          |
| 257212_at   | A13g15090 | phosphoenolpyruvate carboxylase, putative expressed protein                         | 143  | 208  | 224  | 288  | 294  | 234  | 191  | 272  | 0.70     | 0.081347   | 191  | 218  | 210  | 333  | 262  | 221  | 216  | 206  | 251  | 262  | 0.82 | 0.192607 | 272      | 0.76 | 0.124231 |          |
| 257213_at   | A13g15020 | mitochondrial NAD-dependent malate : malate dehydrogenase (NAD), mitochon           | 336  | 388  | 377  | 444  | 538  | 431  | 367  | 471  | 0.78     | 0.049041   | 495  | 523  | 561  | 746  | 574  | 543  | 507  | 476  | 526  | 569  | 0.92 | 0.530183 | 621      | 0.85 | 0.224238 |          |
| 257214_at   | A13g15040 | hypothetical protein : supported by full-len expressed protein                      | 174  | 241  | 218  | 228  | 264  | 198  | 211  | 230  | 0.92     | 0.059013   | 202  | 191  | 228  | 275  | 224  | 220  | 249  | 230  | 207  | 240  | 0.86 | 0.085803 | 240      | 0.86 | 0.195403 |          |
| 257215_at   | A13g15070 | RING zinc finger protein, putative contn zinc finger (C3HC4-type RING finger) fa    | 82   | 134  | 163  | 116  | 144  | 100  | 126  | 120  | 1.05     | 0.822254   | 115  | 121  | 121  | 150  | 123  | 119  | 134  | 126  | 119  | 130  | 0.91 | 0.190243 | 131      | 0.91 | 0.315571 |          |
| 257216_at   | A13g14990 | 4-methyl-5(0-hydroxyethyl)-thiazole m-4-methyl-5(0-hydroxyethyl)-thiazole mor       | 435  | 753  | 1084 | 917  | 886  | 650  | 758  | 818  | 0.93     | 0.783453   | 1127 | 1283 | 1231 | 1431 | 1214 | 1090 | 1452 | 1421 | 1214 | 1322 | 0.92 | 0.330819 | 1245     | 0.97 | 0.789872 |          |
| 257217_at   | A13g14940 | phosphoenolpyruvate carboxylase (PP) phosphoenolpyruvate carboxylase, puta          | 35   | 43   | 51   | 58   | 49   | 48   | 43   | 52   | 0.83     | 0.217920   | 50   | 42   | 52   | 49   | 47   | 39   | 46   | 36   | 48   | 43   | 1.10 | 0.307387 | 46       | 1.07 | 0.534260 |          |
| 257218_at   | A13g15000 | hypothetical protein similar to DAG protein expressed protein                       | 714  | 760  | 773  | 936  | 1140 | 893  | 749  | 990  | 0.76     | 0.037003   | 863  | 802  | 888  | 1120 | 1053 | 924  | 891  | 894  | 851  | 976  | 0.87 | 0.101934 | 1032     | 0.82 | 0.045291 |          |
| 257219_at   | A13g14930 | urocortin/hirvoneo decarboxylase, puta urocortin/hirvoneo decarboxylase, puta       | 107  | 174  | 164  | 159  | 186  | 136  | 148  | 160  | 0.93     | 0.664526   | 120  | 152  | 126  | 157  | 137  | 127  | 155  | 143  | 132  | 144  | 0.92 | 0.312144 | 140      | 0.94 | 0.574471 |          |
| 257220_at   | A13g27812 | MYB family transcription factor (Atmbv mbv family transcription factor) (MYB3) il   | 274  | 386  | 326  | 831  | 1039 | 750  | 328  | 873  | 0.38     | 0.004077   | 202  | 199  | 227  | 1064 | 827  | 610  | 701  | 683  | 209  | 817  | 0.26 | 0.005452 | 900      | 0.23 | 0.007104 |          |
| 257221_at   | A13g27820 | MYB family transcription factor (GL1) v-histone differentiation protein             | 14   | 15   | 15   | 15   | 15   | 15   | 15   | 15   | 0.90     | 0.838059   | 10   | 12   | 13   | 11   | 14   | 13   | 15   | 15   | 15   | 15   | 0.91 | 0.131520 | 15       | 0.91 | 0.815969 |          |
| 257222_at   | A13g27925 | DeoP protease almost identical to Deo DegP protease, putative                       | 154  | 231  | 231  | 239  | 260  | 202  | 205  | 202  | 0.85     | 0.361377   | 186  | 188  | 197  | 279  | 268  | 218  | 234  | 222  | 190  | 238  | 0.80 | 0.018201 | 244      | 0.78 | 0.044093 |          |
| 257223_at   | A13g27840 | 50S ribosomal protein L12-2 identical : 50S ribosomal protein L12-2, chloroplas     | 35   | 33   | 43   | 37   | 39   | 41   | 37   | 39   | 0.95     | 0.806258   | 27   | 20   | 39   | 28   | 32   | 28   | 30   | 39   | 29   | 31   | 0.93 | 0.648907 | 29       | 0.99 | 0.995847 |          |
| 257224_at   | A13g27870 | P-type ATPase, putative similar to ATF halocid dehalogenase-like chloroplast        | 50   | 53   | 78   | 77   | 69   | 57   | 60   | 68   | 0.89     | 0.533343   | 64   | 58   | 66   | 78   | 63   | 61   | 83   | 80   | 63   | 73   | 0.86 | 0.145130 | 68       | 0.93 | 0.442047 |          |
| 257225_s_at | A13g27850 | 50S ribosomal protein L12-2 identical : 50S ribosomal protein L12-1, chloroplas     | 1170 | 1419 | 1606 | 1711 | 1423 | 1461 | 1599 | 0.94 | 0.534307 | 1584       | 1924 | 1666 | 2190 | 1684 | 1968 | 1932 | 1725 | 1864 | 1991 | 1932 | 0.91 | 0.622323 | 1864     | 0.93 | 0.617472 |          |
| 257226_at   | A13g27880 | hypothetical protein predicted by c1er expressed protein                            | 87   | 122  | 124  | 195  | 225  | 179  | 111  | 200  | 0.56     | 0.008064   | 93   | 133  | 118  | 241  | 174  | 137  | 152  | 145  | 115  | 170  | 0.67 | 0.081598 | 184      | 0.62 | 0.098970 |          |
| 257227_at   | A13g27820 | monodehydroascorbate reductase simi monodehydroascorbate reductase, puta            | 341  | 465  | 501  | 523  | 580  | 498  | 436  | 534  | 0.82     | 0.144244   | 413  | 384  | 420  | 601  | 499  | 426  | 516  | 526  | 406  | 513  | 0.79 | 0.030537 | 508      | 0.80 | 0.119418 |          |
| 257228_at   | A13g27890 | NADPH:quinone oxidoreductase (NQR) NADPH-dependent FMN reductase fami               | 86   | 110  | 112  | 138  | 124  | 105  | 103  | 122  | 0.84     | 0.202471   | 160  | 188  | 194  | 256  | 199  | 180  | 193  | 188  | 181  | 203  | 0.89 | 0.306638 | 211      | 0.86 | 0.291556 |          |
| 257229_at   | A13g16040 | putative lectin similar to lectin SF-P028 tegume lectin family protein              | 429  | 495  | 485  | 479  | 577  | 429  | 470  | 485  | 0.97     | 0.813040   | 324  | 339  | 359  | 495  | 406  | 392  | 419  | 392  | 406  | 419  | 0.81 | 0.025170 | 431      | 0.79 | 0.037356 |          |
| 257230_at   | A13g16540 | DeoP protease contains similarity to De DegP protease, putative                     | 27   | 31   | 37   | 33   | 39   | 37   | 32   | 37   | 0.87     | 0.239513   | 22   | 28   | 30   | 28   | 22   | 20   | 25   | 26   | 27   | 24   | 1.11 | 0.331941 | 23       | 1.15 | 0.340689 |          |
| 257231_at   | A13g16550 | DeoP protease contains similarity to De DegP protease, putative                     | 23   | 25   | 31   | 24   | 25   | 25   | 26   | 25   | 1.06     | 0.600533   | 24   | 26   | 28   | 20   | 23   | 22   | 23   | 26   | 26   | 23   | 1.13 | 0.086336 | 22       | 1.19 | 0.024953 |          |
| 257232_at   | A13g16500 | photochrome-associated protein 1 (PAI auxin-resonantive AUX/IAA famivl prore        | 95   | 158  | 109  | 108  | 104  | 90   | 121  | 101  | 1.20     | 0.369723   | 80   | 101  | 105  | 126  | 100  | 97   | 110  | 95   | 95   | 106  | 0.90 | 0.312155 | 108      | 0.88 | 0.358992 |          |
| 257205_at   | A13g16520 | putative glucosyltransferase similar to UDP-4-glucuronosylUDP-glucosyl transfe      | 752  | 961  | 861  | 805  | 894  | 629  | 858  | 776  | 1.11     | 0.451142   | 589  | 572  | 644  | 913  | 802  | 769  | 793  | 782  | 602  | 812  | 0.74 | 0.001504 | 828      | 0.73 | 0.009847 |          |
| 257206_at   | A13g16510 | putative lectin similar to lectin SF-P028 tegume lectin family protein              | 25   | 29   | 30   | 30   | 30   | 31   | 41   | 77   | 0.99     | 0.091092   | 24   | 23   | 23   | 24   | 24   | 27   | 29   | 27   | 24   | 29   | 0.99 | 0.885483 | 23       | 1.02 | 0.851969 |          |
| 257175_s_at | A13g23470 | cydoparone fatty-acyl-phospholipid s cydoparone fatty-acyl-phospholipid s           | 8    | 6    | 12   | 11   | 10   | 13   | 8    | 11   | 0.75     | 0.239299   | 6    | 11   | 7    | 12   | 10   | 17   | 14   | 16   | 8    | 14   | 0.59 | 0.034026 | 13       | 0.63 | 0.136749 |          |
| 257176_s_at | A13g23510 | cydoparone fatty-acyl-phospholipid s cydoparone fatty acid synthase, puta           | 40   | 70   | 55   | 51   | 54   | 48   | 55   | 51   | 1.08     | 0.673597   | 37   | 44   | 50   | 46   | 50   | 46   | 37   | 33   | 50   | 38   | 44   | 1.07     | 0.560162 | 39   | 1.13     | 0.391184 |
| 257177_at   | A13g23490 | cvanate lyase (CVN) identical to cvanate cvanate lyase family                       | 664  | 891  | 1093 | 1100 | 1227 | 942  | 883  | 1089 | 0.81     | 0.237333   | 1014 | 1213 | 1123 | 1643 | 1369 | 1301 | 1275 | 1278 | 1117 | 1373 | 0.81 | 0.045175 | 1438     | 0.78 | 0.054593 |          |
| 257178_at   | A13g23500 | hemolysin-like protein similar to hemolysin CBS domain-containing protein / transco | 354  | 512  | 453  | 519  | 688  | 431  | 434  | 512  | 0.85     | 0.298700   | 431  | 434  | 329  | 409  | 364  | 389  | 301  | 368  | 301  | 368  | 0.85 | 0.146073 | 348      |      |          |          |

|             |           |                                                                                      |      |      |      |      |      |      |      |      |          |          |      |      |      |      |      |      |      |      |      |      |      |          |      |      |          |
|-------------|-----------|--------------------------------------------------------------------------------------|------|------|------|------|------|------|------|------|----------|----------|------|------|------|------|------|------|------|------|------|------|------|----------|------|------|----------|
| 257164_at   | A13g24320 | mismatch binding protein, putative siml DNA mismatch repair MutS family (MSH         | 109  | 130  | 148  | 166  | 194  | 139  | 129  | 166  | 0.77     | 0.124971 | 97   | 84   | 107  | 128  | 115  | 93   | 111  | 113  | 96   | 112  | 0.86 | 0.126981 | 112  | 0.86 | 0.265356 |
| 257165_at   | A13g24330 | beta-1,3-glucanase, putative similar to glucosyl hydrolase family 17 protein         | 43   | 40   | 56   | 58   | 52   | 78   | 46   | 63   | 0.74     | 0.153552 | 36   | 36   | 51   | 34   | 38   | 39   | 37   | 35   | 41   | 37   | 1.12 | 0.279917 | 37   | 1.12 | 0.458283 |
| 257166_at   | A13g24340 | hydrothermal protein similar to putative I hydrothermal protein                      | 24   | 26   | 35   | 38   | 34   | 29   | 28   | 33   | 0.85     | 0.328161 | 20   | 23   | 27   | 24   | 18   | 20   | 31   | 19   | 23   | 22   | 1.05 | 0.749249 | 21   | 1.14 | 0.312093 |
| 257167_at   | A13g24350 | hydrothermal protein predicted by gene SNP2 domain-containing protein / helica       | 137  | 137  | 141  | 481  | 591  | 399  | 492  | 0.81 | 0.231699 | 339      | 399  | 253  | 334  | 140  | 378  | 307  | 339  | 339  | 378  | 307  | 0.86 | 0.19647  | 371  | 0.86 | 0.073511 |
| 257168_at   | A13g24430 | mro protein, putative similar to mro or expressed protein                            | 291  | 267  | 257  | 288  | 285  | 254  | 238  | 276  | 0.86     | 0.228986 | 228  | 250  | 274  | 362  | 287  | 257  | 335  | 304  | 251  | 309  | 0.81 | 0.068905 | 302  | 0.83 | 0.206113 |
| 257169_at   | A13g24315 | Expressed protein ; supported by full-le sec20 family                                | 193  | 278  | 291  | 287  | 320  | 240  | 254  | 282  | 0.90     | 0.505615 | 231  | 292  | 243  | 382  | 287  | 278  | 299  | 282  | 255  | 306  | 0.84 | 0.137001 | 316  | 0.81 | 0.188295 |
| 257142_at   | A13g20090 | cytochrome P450, putative contains P1 cytochrome P450 family protein                 | 14   | 22   | 16   | 19   | 24   | 16   | 17   | 20   | 0.86     | 0.482067 | 17   | 18   | 18   | 23   | 19   | 15   | 19   | 17   | 17   | 19   | 0.94 | 0.564374 | 19   | 0.92 | 0.547313 |
| 257143_at   | A13g20110 | cytochrome P450, putative contains P1 cytochrome P450 family protein                 | 14   | 16   | 16   | 12   | 15   | 14   | 14   | 10   | 0.99     | 0.491912 | 13   | 17   | 14   | 13   | 14   | 13   | 9    | 14   | 9    | 12   | 1.22 | 0.298979 | 10   | 1.39 | 0.024232 |
| 257112_at   | A13g20120 | cytochrome P450, putative contains P1 cytochrome P450 family protein                 | 117  | 162  | 161  | 193  | 242  | 170  | 147  | 202  | 0.73     | 0.101218 | 152  | 136  | 151  | 240  | 208  | 184  | 221  | 214  | 147  | 214  | 0.69 | 0.001821 | 211  | 0.70 | 0.019104 |
| 257113_at   | A13g20130 | cytochrome P450, putative contains P1 cytochrome P450 family protein                 | 27   | 38   | 36   | 38   | 34   | 35   | 36   | 0.96 | 0.745774 | 31       | 34   | 38   | 35   | 38   | 27   | 39   | 35   | 34   | 33   | 34   | 1.05 | 0.680727 | 30   | 1.14 | 0.263400 |
| 257114_at   | A13g20140 | cytochrome P450, putative contains P1 cytochrome P450 family protein                 | 29   | 21   | 29   | 29   | 30   | 32   | 26   | 31   | 0.86     | 0.210486 | 22   | 24   | 33   | 20   | 24   | 29   | 27   | 22   | 26   | 24   | 1.08 | 0.579699 | 24   | 1.08 | 0.675313 |
| 257115_at   | A13g20150 | Kinesin-like protein contains Pfam profil kinesin motor family protein               | 137  | 183  | 179  | 177  | 186  | 155  | 166  | 173  | 0.96     | 0.231699 | 144  | 128  | 151  | 140  | 125  | 102  | 132  | 124  | 141  | 125  | 1.13 | 0.147691 | 122  | 1.15 | 0.227682 |
| 257116_at   | A13g20202 | arabinose methyltransferase, putative si protein arabinose N-methyltransferase fan   | 159  | 213  | 215  | 261  | 299  | 216  | 196  | 259  | 0.76     | 0.105995 | 166  | 187  | 196  | 291  | 212  | 208  | 209  | 214  | 163  | 226  | 0.81 | 0.101877 | 237  | 0.77 | 0.133386 |
| 257117_at   | A13g20160 | ceranyl ceranyl pyrophosphate synthase ceranylceranyl pyrophosphate synthase         | 46   | 38   | 49   | 51   | 48   | 53   | 40   | 51   | 0.80     | 0.081560 | 17   | 27   | 33   | 31   | 23   | 25   | 31   | 30   | 26   | 28   | 0.92 | 0.610131 | 26   | 0.98 | 0.926232 |
| 257118_at   | A13g20180 | hydrothermal protein                                                                 | 34   | 72   | 55   | 100  | 107  | 80   | 57   | 96   | 0.60     | 0.025145 | 73   | 65   | 81   | 114  | 102  | 82   | 76   | 77   | 73   | 90   | 0.81 | 0.166929 | 99   | 0.74 | 0.067150 |
| 257119_at   | A13g20190 | receptor kinase protein, putative simila leucine-rich repeat transmembrane prot      | 27   | 28   | 40   | 33   | 35   | 33   | 32   | 34   | 0.94     | 0.865375 | 21   | 21   | 29   | 24   | 21   | 29   | 20   | 22   | 24   | 23   | 1.03 | 0.834800 | 25   | 0.97 | 0.811874 |
| 257120_at   | A13g20200 | hydrothermal protein                                                                 | 74   | 67   | 90   | 97   | 113  | 95   | 84   | 102  | 0.82     | 0.074695 | 78   | 70   | 90   | 94   | 93   | 73   | 67   | 80   | 79   | 85   | 0.93 | 0.395200 | 87   | 0.92 | 0.446631 |
| 257121_at   | A13g20220 | hydrothermal protein similar to auxin-ind hydrothermal protein similar to auxin-indu | 44   | 35   | 47   | 26   | 47   | 23   | 42   | 32   | 1.31     | 0.300598 | 21   | 27   | 27   | 19   | 17   | 17   | 17   | 14   | 25   | 17   | 1.46 | 0.005415 | 18   | 1.38 | 0.026932 |
| 257122_at   | A13g20250 | RNA-binding protein, putative contains pumilio/Puf RNA-binding domain-contain        | 228  | 347  | 425  | 395  | 476  | 309  | 334  | 393  | 0.85     | 0.469695 | 287  | 257  | 301  | 368  | 331  | 295  | 378  | 355  | 282  | 346  | 0.82 | 0.026360 | 332  | 0.85 | 0.112915 |
| 257123_at   | A13g20303 | hydrothermal protein                                                                 | 21   | 17   | 23   | 21   | 23   | 22   | 20   | 22   | 0.93     | 0.433221 | 15   | 17   | 16   | 13   | 15   | 15   | 17   | 13   | 16   | 14   | 1.12 | 0.201535 | 14   | 1.14 | 0.105346 |
| 257124_at   | A13g20040 | hexokinase, putative similar to hexokin hexokinase, putative                         | 82   | 120  | 123  | 125  | 137  | 102  | 108  | 121  | 0.89     | 0.478957 | 93   | 90   | 102  | 140  | 117  | 95   | 110  | 108  | 95   | 114  | 0.83 | 0.110380 | 117  | 0.81 | 0.172778 |
| 257125_at   | A13g20050 | T-complex polypeptide 1 homologous Ide T-complex protein 1 alpha subunit / TCF       | 955  | 1058 | 1066 | 1257 | 1284 | 1040 | 1026 | 1194 | 0.86     | 0.120259 | 783  | 687  | 799  | 1055 | 911  | 786  | 956  | 860  | 756  | 914  | 0.83 | 0.052988 | 918  | 0.82 | 0.131242 |
| 257126_at   | A13g20060 | E2 ubiquitin-conjugating enzyme, E2 ubiquitin-conjugating enzyme 19 (UBC1)           | 371  | 459  | 498  | 598  | 598  | 485  | 442  | 551  | 0.80     | 0.098591 | 442  | 501  | 548  | 781  | 619  | 536  | 517  | 513  | 497  | 593  | 0.84 | 0.224894 | 645  | 0.77 | 0.130601 |
| 257127_at   | A13g20070 | hydrothermal protein predicted by gene expressed protein                             | 128  | 154  | 150  | 171  | 187  | 165  | 144  | 175  | 0.82     | 0.041777 | 123  | 158  | 184  | 216  | 166  | 151  | 169  | 165  | 155  | 173  | 0.89 | 0.387177 | 178  | 0.87 | 0.438194 |
| 257128_at   | A13g20080 | cytochrome P450, putative contains P1 cytochrome P450 family protein                 | 32   | 34   | 35   | 43   | 39   | 37   | 34   | 40   | 0.85     | 0.043643 | 28   | 26   | 35   | 43   | 31   | 27   | 41   | 38   | 30   | 36   | 0.83 | 0.225314 | 34   | 0.89 | 0.535151 |
| 257129_at   | A13g20100 | cytochrome P450, putative contains P1 cytochrome P450 family protein                 | 58   | 88   | 95   | 69   | 53   | 55   | 80   | 59   | 1.36     | 0.158884 | 171  | 170  | 180  | 155  | 106  | 104  | 185  | 157  | 174  | 141  | 1.23 | 0.177904 | 122  | 1.43 | 0.036734 |
| 257130_at   | A13g20210 | vacuolar processing enzyme/asparagin vacuolar processing enzyme, putative / i        | 1122 | 1471 | 1903 | 1351 | 715  | 924  | 1499 | 997  | 1.50     | 0.161979 | 3277 | 2966 | 3205 | 3018 | 2496 | 2110 | 2357 | 2364 | 3149 | 2469 | 1.28 | 0.018518 | 2542 | 1.24 | 0.095122 |
| 257131_at   | A13g20240 | mitochondrial carrier protein, putative c mitochondrial substrate carrier family or  | 137  | 180  | 194  | 211  | 227  | 198  | 171  | 212  | 0.81     | 0.096122 | 153  | 156  | 162  | 207  | 182  | 182  | 180  | 174  | 157  | 185  | 0.85 | 0.011716 | 190  | 0.82 | 0.018252 |
| 257132_at   | A13g20230 | hydrothermal protein predicted by gene S05 ribosomal protein L18 family              | 152  | 248  | 230  | 219  | 254  | 187  | 210  | 220  | 0.96     | 0.734447 | 236  | 247  | 262  | 322  | 280  | 271  | 249  | 243  | 248  | 273  | 0.91 | 0.244811 | 291  | 0.85 | 0.086319 |
| 257133_at   | A13g17190 | hydrothermal protein predicted by gene hydrothermal protein                          | 10   | 10   | 10   | 9    | 10   | 9    | 10   | 9    | 0.93     | 0.695002 | 9    | 9    | 9    | 11   | 9    | 9    | 9    | 9    | 9    | 9    | 0.93 | 0.695002 | 9    | 0.94 | 0.802485 |
| 257134_at   | A13g12870 | hydrothermal protein similar to oxidized; expressed protein                          | 416  | 498  | 407  | 528  | 566  | 434  | 440  | 510  | 0.86     | 0.227826 | 520  | 435  | 547  | 657  | 566  | 516  | 493  | 498  | 501  | 546  | 0.92 | 0.381980 | 579  | 0.86 | 0.214820 |
| 257135_at   | A13g12900 | hydrothermal protein similar to oxidized; expressed protein, ZOG-Fc(II) oxynase I    | 67   | 67   | 72   | 88   | 115  | 99   | 69   | 101  | 0.68     | 0.015156 | 55   | 63   | 77   | 70   | 66   | 58   | 97   | 85   | 65   | 75   | 0.97 | 0.378489 | 65   | 1.01 | 0.933995 |
| 257136_at   | A13g12890 | hydrothermal protein predicted by gene expressed protein                             | 32   | 37   | 43   | 48   | 44   | 51   | 37   | 51   | 0.73     | 0.150975 | 52   | 45   | 49   | 55   | 49   | 51   | 57   | 52   | 49   | 53   | 0.92 | 0.170142 | 51   | 0.95 | 0.383562 |
| 257137_at   | A13g28860 | P-oligoacrolein, putative similar to P-oligoacrolein resistance P-oligoacrolein      | 1643 | 1772 | 1815 | 2099 | 2461 | 1768 | 1744 | 2108 | 0.82     | 0.152894 | 1434 | 1256 | 1359 | 1667 | 1723 | 1274 | 1676 | 1591 | 1349 | 1586 | 0.85 | 0.033818 | 1554 | 0.87 | 0.244688 |
| 257138_at   | A13g28870 | hydrothermal protein predicted by gene hydrothermal protein                          | 9    | 11   | 13   | 15   | 14   | 16   | 11   | 15   | 0.72     | 0.029889 | 9    | 9    | 10   | 9    | 10   | 9    | 12   | 9    | 9    | 10   | 0.99 | 0.904931 | 9    | 1.07 | 0.503883 |
| 257139_at   | A13g28890 | disease resistance protein, putative sir leucine-rich repeat family protein          | 29   | 35   | 35   | 36   | 41   | 42   | 33   | 40   | 0.84     | 0.072881 | 32   | 32   | 40   | 33   | 38   | 48   | 43   | 35   | 35   | 39   | 0.88 | 0.303230 | 39   | 0.88 | 0.392209 |
| 257140_at   | A13g28910 | MYB family transcription factor (har1), myb family transcription factor (MYB30)      | 366  | 305  | 386  | 464  | 509  | 403  | 352  | 458  | 0.77     | 0.053999 | 338  | 292  | 296  | 454  | 312  | 314  | 414  | 373  | 308  | 373  | 0.83 | 0.142098 | 360  | 0.86 | 0.352407 |
| 257141_at   | A13g28900 | S05 ribosomal protein L34, putative sir S05 ribosomal protein L34 (RPL34C)           | 1334 | 1584 | 1612 | 1596 | 1690 | 1515 | 1510 | 1601 | 0.84     | 0.216263 | 1402 | 1603 | 1573 | 2009 | 1554 | 1505 | 1497 | 1504 | 1526 | 1614 | 0.85 | 0.051267 | 1689 | 0.90 | 0.396759 |
| 257106_at   | A13g29005 | unknown protein                                                                      | 23   | 32   | 39   | 29   | 37   | 35   | 31   | 34   | 0.93     | 0.056861 | 22   | 26   | 27   | 25   | 23   | 22   | 30   | 25   | 25   | 25   | 1.00 | 0.686646 | 23   | 1.07 | 0.444971 |
| 257107_at   | A13g29070 | transmembrane trafficking protein, out: emp24/gp25L/p24 family protein               | 37   | 42   | 55   | 47   | 55   | 48   | 45   | 50   | 0.89     | 0.403036 | 32   | 31   | 37   | 36   | 31   | 29   | 40   | 42   | 33   | 36   | 0.93 | 0.521500 | 32   | 1.03 | 0.731262 |
| 257108_x_at | A13g30490 | hydrothermal protein                                                                 | 29   | 33   | 43   | 35   | 36   | 35   | 35   | 35   | 1.00     | 0.973398 | 28   | 32   | 45   | 32   | 30   | 30   | 28   | 29   | 35   | 30   | 1.17 | 0.220838 | 31   | 1.14 | 0.444198 |
| 257109_s_at | A13g30500 | hydrothermal protein                                                                 | 17   | 20   | 23   | 25   | 20   | 21   | 22   | 24   | 0.94     | 0.712338 | 20   | 20   | 21   | 24   | 16   | 19   | 25   | 17   | 20   | 19   | 1.06 | 0.584245 | 18   | 1.15 | 0.049236 |
| 257110_x_at | A13g30440 | hydrothermal protein                                                                 | 57   | 73   | 65   | 76   | 55   | 79   | 75   | 80   | 0.94     | 0.696502 | 31   | 32   | 47   | 37   | 45   | 38   | 43   | 37   | 38   | 39   | 0.93 | 0.598102 | 39   | 0.94 | 0.734608 |
| 257111_x_at | A13g30450 | hydrothermal protein                                                                 | 22   | 23   | 28   | 25   | 22   | 30   | 25   | 26   | 0.94     | 0.639838 | 20   | 11   | 18   | 18   | 17   | 13   | 16   | 17   | 16   | 16   | 1.00 | 0.990113 | 16   | 1.00 | 0.990461 |
| 257081_at   | A13g30460 | RING zinc finger protein contains Pfam zinc finger (C3HC4-type RING finger) fa       | 28   | 31   | 41   | 38   | 34   | 37   | 33   | 36   | 0.92     | 0.537461 | 29   | 32   | 46   | 32   | 28   | 29   | 35   | 29   | 36   | 31   | 1.16 | 0.277986 | 30   | 1.20 | 0.327932 |
| 257082_at   | A13g30580 | hydrothermal protein                                                                 | 34   | 34   | 42   | 44   | 44   | 31   | 36   | 39   | 0.92     | 0.583502 | 22   | 23   | 34   | 21   | 21   | 24   | 25   | 19   | 26   | 22   | 1.19 | 0.228022 | 22   | 1.18 | 0.360611 |
| 257083_s_at | A13g30540 | non-race specific disease resistance o non-race specific disease resistance or       | 10   | 10   | 10   | 7    | 16   | 11   | 10   | 9    | 0.53     | 0.150205 | 16   | 17   | 18   | 18   | 22   | 19   | 21   | 13   | 13   | 22   | 0.99 | 0.005289 | 22   | 0.99 | 0.047011 |
| 257084_at   | A13g20620 | unknown protein                                                                      | 126  | 140  | 153  | 166  | 193  | 154  | 137  | 171  | 0.80     | 0.093015 | 128  | 120  | 138  | 176  | 161  | 147  | 160  | 153  | 128  | 159  | 0.81 | 0.006507 | 161  | 0.80 | 0.030449 |

|             |           |                                                                                        |      |      |      |      |      |      |      |      |          |          |      |      |      |      |      |      |      |      |      |      |          |          |      |          |          |
|-------------|-----------|----------------------------------------------------------------------------------------|------|------|------|------|------|------|------|------|----------|----------|------|------|------|------|------|------|------|------|------|------|----------|----------|------|----------|----------|
| 257075_at   | A13g19670 | unknown protein contains Pfam profile: FF domain-containing protein / WW dorr          | 127  | 166  | 169  | 159  | 183  | 149  | 154  | 164  | 0.4      | 0.588528 | 113  | 106  | 134  | 139  | 119  | 101  | 120  | 129  | 118  | 122  | 0.97     | 0.712930 | 120  | 0.98     | 0.887160 |
| 257076_at   | A13g19680 | unknown protein                                                                        | 77   | 45   | 83   | 54   | 64   | 52   | 68   | 57   | 1.20     | 0.398989 | 145  | 172  | 109  | 167  | 121  | 123  | 216  | 209  | 142  | 167  | 0.85     | 0.434230 | 137  | 1.04     | 0.846186 |
| 257077_at   | A13g19690 | PR-1 protein, putative similar to PR-1a pathogenesis-related protein, putative         | 18   | 21   | 30   | 22   | 23   | 25   | 23   | 23   | 0.98     | 0.920397 | 23   | 28   | 26   | 21   | 18   | 18   | 24   | 18   | 26   | 19   | 1.32     | 0.025146 | 18   | 1.40     | 0.020366 |
| 257043_at   | A13g19700 | receptor-like protein kinase, putative 610                                             | 40   | 65   | 62   | 67   | 61   | 63   | 64   | 63   | 0.82     | 0.347608 | 61   | 63   | 61   | 67   | 69   | 63   | 50   | 63   | 50   | 63   | 0.97     | 0.917070 | 63   | 1.11     | 0.146686 |
| 257044_at   | A13g19720 | hyothetical protein predicted by censec dynamin family protein                         | 178  | 211  | 216  | 257  | 270  | 221  | 202  | 250  | 0.81     | 0.063212 | 153  | 164  | 211  | 248  | 208  | 167  | 188  | 169  | 176  | 198  | 0.89     | 0.400128 | 204  | 0.86     | 0.430284 |
| 257045_at   | A13g19730 | dynamin-like protein similar to phraegc dynamin family protein                         | 29   | 36   | 42   | 52   | 59   | 42   | 36   | 51   | 0.70     | 0.069919 | 21   | 19   | 20   | 22   | 20   | 18   | 22   | 19   | 20   | 20   | 0.98     | 0.745890 | 20   | 0.99     | 0.898721 |
| 257046_at   | A13g19740 | ATPase, putative similar to spoasin pro AAA-type ATPase family protein                 | 277  | 333  | 353  | 384  | 423  | 327  | 321  | 378  | 0.85     | 0.186814 | 212  | 185  | 239  | 301  | 258  | 203  | 256  | 265  | 212  | 257  | 0.83     | 0.109698 | 254  | 0.84     | 0.264431 |
| 257047_at   | A13g19750 | hyothetical protein predicted by censec dynamin family protein                         | 149  | 183  | 190  | 207  | 217  | 189  | 189  | 191  | 0.51     | 0.433670 | 122  | 114  | 122  | 119  | 115  | 134  | 124  | 119  | 134  | 132  | 1.02     | 0.258451 | 135  | 0.88     | 0.175499 |
| 257048_at   | A13g19750 | hyothetical protein predicted by censec dynamin family protein                         | 34   | 50   | 44   | 63   | 68   | 51   | 43   | 61   | 0.70     | 0.059695 | 24   | 26   | 32   | 23   | 23   | 24   | 24   | 24   | 24   | 24   | 1.16     | 0.089998 | 24   | 1.16     | 0.212822 |
| 257017_at   | A13g19620 | beta-xylotriase, autative similar to bet glycosyl hydrolase family 3 protein           | 21   | 26   | 34   | 30   | 32   | 28   | 27   | 30   | 0.91     | 0.543447 | 23   | 24   | 31   | 22   | 22   | 22   | 24   | 25   | 26   | 23   | 1.11     | 0.277283 | 23   | 1.15     | 0.281529 |
| 257018_at   | A13g19630 | unknown protein                                                                        | 226  | 248  | 232  | 266  | 216  | 216  | 238  | 0.91 | 0.453938 | 229      | 292  | 240  | 356  | 271  | 238  | 297  | 285  | 254  | 289  | 0.88 | 0.273686 | 288      | 0.88 | 0.440329 |          |
| 257019_at   | A13g19640 | unknown protein                                                                        | 503  | 640  | 755  | 796  | 667  | 633  | 796  | 0.80 | 0.25167  | 673      | 640  | 667  | 966  | 774  | 736  | 781  | 728  | 660  | 797  | 0.87 | 0.058059 | 825      | 0.80 | 0.083577 |          |
| 257020_at   | A13g19650 | mitotic checkpoint protein, putative Sm WD-40 repeat family protein / mitotic chr      | 494  | 610  | 666  | 776  | 614  | 555  | 686  | 0.81 | 0.090167 | 643      | 610  | 692  | 930  | 759  | 669  | 697  | 652  | 646  | 741  | 0.87 | 0.234311 | 798      | 0.82 | 0.151540 |          |
| 257021_at   | A13g19710 | branched-chain amino acid aminotransf branched-chain amino acid aminotransf            | 27   | 34   | 38   | 33   | 39   | 32   | 33   | 35   | 0.94     | 0.637481 | 23   | 24   | 29   | 24   | 26   | 24   | 36   | 26   | 25   | 27   | 0.93     | 0.575294 | 25   | 1.02     | 0.775023 |
| 257022_at   | A13g19580 | zinc finger protein, putative similar to C zinc finger protein, putative similar to C1 | 103  | 133  | 176  | 135  | 149  | 88   | 137  | 124  | 1.11     | 0.654947 | 87   | 106  | 83   | 75   | 74   | 68   | 90   | 80   | 92   | 77   | 1.19     | 0.085499 | 72   | 1.28     | 0.052404 |
| 257023_at   | A13g19760 | RNA helicase, putative similar to RNA eukaryotic translation initiation factor 4A      | 1239 | 1615 | 1607 | 1942 | 2069 | 1661 | 1487 | 1891 | 0.77     | 0.079842 | 1246 | 1180 | 1263 | 1826 | 1412 | 1341 | 1506 | 1445 | 1230 | 1506 | 0.82     | 0.051518 | 1527 | 0.81     | 0.125246 |
| 257024_at   | A13g19100 | CDPK-related kinase identical to GB-23 calcium-dependent protein kinase, outat         | 274  | 368  | 408  | 420  | 482  | 383  | 349  | 428  | 0.82     | 0.182390 | 290  | 271  | 269  | 385  | 325  | 291  | 358  | 339  | 277  | 339  | 0.82     | 0.027682 | 333  | 0.83     | 0.117250 |
| 257025_at   | A13g19190 | hyothetical protein predicted by censec dynamin family protein                         | 90   | 117  | 135  | 142  | 147  | 110  | 114  | 133  | 0.86     | 0.342338 | 84   | 76   | 92   | 100  | 88   | 74   | 94   | 85   | 84   | 88   | 0.95     | 0.560504 | 87   | 0.96     | 0.728684 |
| 257026_at   | A13g19200 | hyothetical protein predicted by censec dynamin family protein                         | 33   | 46   | 40   | 53   | 59   | 45   | 40   | 52   | 0.76     | 0.078812 | 37   | 32   | 46   | 35   | 38   | 32   | 33   | 39   | 39   | 35   | 1.09     | 0.393237 | 35   | 1.10     | 0.479030 |
| 257027_at   | A13g19210 | DNA repair protein, putative similar to DNA repair protein RAD54, putative             | 52   | 70   | 83   | 65   | 80   | 74   | 68   | 73   | 0.93     | 0.638108 | 35   | 39   | 43   | 38   | 36   | 31   | 40   | 34   | 39   | 36   | 1.09     | 0.279671 | 35   | 1.11     | 0.278526 |
| 257028_at   | A13g19230 | hyothetical protein predicted by censec leucine-rich repeat family protein             | 31   | 35   | 45   | 44   | 46   | 31   | 37   | 40   | 0.91     | 0.610435 | 34   | 36   | 30   | 34   | 26   | 25   | 33   | 29   | 30   | 30   | 1.02     | 0.896139 | 29   | 1.06     | 0.747299 |
| 257029_at   | A13g19240 | dem-like protein similar to dem GB-C2 expressed protein                                | 531  | 461  | 617  | 728  | 741  | 598  | 536  | 689  | 0.78     | 0.076172 | 305  | 257  | 312  | 371  | 303  | 268  | 365  | 354  | 291  | 332  | 0.88     | 0.214489 | 314  | 0.93     | 0.548730 |
| 257030_at   | A13g19110 | unknown protein                                                                        | 35   | 47   | 28   | 32   | 29   | 29   | 37   | 30   | 1.23     | 0.293314 | 30   | 41   | 37   | 36   | 28   | 24   | 27   | 32   | 36   | 28   | 1.22     | 0.121813 | 29   | 1.22     | 0.242004 |
| 257031_at   | A13g19280 | fucosyltransferase, putative similar to f aluciferon 3-alpha-L-fucosyltransferas       | 59   | 82   | 84   | 80   | 96   | 69   | 75   | 81   | 0.92     | 0.606249 | 67   | 57   | 64   | 93   | 77   | 81   | 87   | 81   | 63   | 84   | 0.75     | 0.003150 | 84   | 0.75     | 0.022885 |
| 257032_at   | A13g19140 | zinc finger protein, putative similar to F hyothetical protein                         | 17   | 18   | 24   | 19   | 24   | 22   | 19   | 22   | 0.90     | 0.418887 | 13   | 14   | 18   | 16   | 13   | 12   | 12   | 14   | 15   | 15   | 0.97     | 0.851190 | 14   | 1.09     | 0.536469 |
| 257033_at   | A13g19170 | metalloprotease, putative similar to me peptidase M16 family protein / insulinase      | 365  | 487  | 467  | 529  | 546  | 429  | 440  | 501  | 0.88     | 0.307692 | 286  | 250  | 382  | 413  | 315  | 268  | 315  | 338  | 306  | 330  | 0.93     | 0.598446 | 332  | 0.92     | 0.678522 |
| 257034_at   | A13g19180 | hyothetical protein predicted by censec cell division protein-related                  | 25   | 36   | 39   | 56   | 52   | 51   | 34   | 53   | 0.63     | 0.017085 | 35   | 37   | 39   | 53   | 36   | 34   | 29   | 26   | 37   | 36   | 1.04     | 0.824040 | 41   | 0.90     | 0.540093 |
| 257035_at   | A13g19270 | cytochrome P450, putative similar to c cytochrome P450 family protein                  | 265  | 258  | 268  | 313  | 451  | 281  | 263  | 349  | 0.76     | 0.177892 | 93   | 80   | 98   | 153  | 161  | 136  | 137  | 140  | 90   | 145  | 0.62     | 0.003099 | 150  | 0.60     | 0.002925 |
| 257036_at   | A13g19210 | hyothetical protein predicted by censec expressed protein                              | 188  | 253  | 244  | 288  | 326  | 225  | 228  | 280  | 0.82     | 0.223818 | 198  | 203  | 207  | 310  | 231  | 231  | 264  | 239  | 203  | 255  | 0.80     | 0.041116 | 257  | 0.79     | 0.108503 |
| 257037_at   | A13g19130 | nuclear acid binding protein, putative s RNA-binding protein                           | 258  | 280  | 269  | 338  | 283  | 268  | 336  | 0.83 | 0.070883 | 294      | 281  | 290  | 317  | 290  | 317  | 290  | 317  | 290  | 317  | 290  | 0.84     | 0.071088 | 290  | 0.84     | 0.146890 |
| 257038_at   | A13g19260 | longevity factor-like protein similar to L longevity-assurance (LAG1) family protein   | 137  | 192  | 217  | 227  | 246  | 196  | 182  | 223  | 0.82     | 0.216104 | 125  | 115  | 130  | 175  | 146  | 142  | 162  | 138  | 124  | 153  | 0.81     | 0.026754 | 154  | 0.80     | 0.056817 |
| 257039_at   | A13g19160 | tRNA isopentenyl transferase, putative adenylated isopentenyltransferase 8 / adi       | 50   | 63   | 64   | 70   | 73   | 59   | 59   | 67   | 0.88     | 0.255057 | 42   | 37   | 45   | 42   | 31   | 35   | 40   | 37   | 41   | 37   | 1.12     | 0.202747 | 36   | 1.15     | 0.235715 |
| 257040_at   | A13g19220 | hyothetical protein : supported by cDNA: expressed protein                             | 95   | 126  | 155  | 138  | 146  | 132  | 125  | 138  | 0.90     | 0.496624 | 97   | 116  | 108  | 150  | 109  | 121  | 129  | 115  | 107  | 125  | 0.86     | 0.130636 | 127  | 0.85     | 0.212864 |
| 257041_at   | A13g28550 | unknown protein                                                                        | 18   | 19   | 18   | 19   | 18   | 19   | 18   | 19   | 0.89     | 0.081569 | 24   | 21   | 25   | 25   | 20   | 23   | 23   | 23   | 23   | 23   | 1.02     | 0.864245 | 22   | 1.06     | 0.478890 |
| 257042_s_at | A13g28640 | hyothetical protein predicted by censec pentacyclic diol (PPR) repeat-containi         | 43   | 53   | 57   | 69   | 68   | 62   | 51   | 66   | 0.77     | 0.033115 | 38   | 37   | 47   | 53   | 36   | 38   | 79   | 35   | 40   | 48   | 0.84     | 0.520141 | 42   | 0.96     | 0.785098 |
| 257015_at   | A13g28680 | hyothetical protein predicted by censec poly(carboxypeptide)-related                   | 27   | 39   | 42   | 48   | 42   | 55   | 36   | 48   | 0.74     | 0.112200 | 32   | 32   | 41   | 33   | 32   | 30   | 34   | 31   | 35   | 32   | 1.09     | 0.250207 | 32   | 1.10     | 0.353776 |
| 257016_at   | A13g28690 | protein kinase, putative similar to PRO protein kinase, putative                       | 165  | 236  | 248  | 294  | 313  | 244  | 216  | 284  | 0.77     | 0.110105 | 184  | 196  | 196  | 283  | 241  | 220  | 258  | 238  | 192  | 248  | 0.77     | 0.008522 | 248  | 0.77     | 0.041827 |
| 256988_at   | A13g28700 | hyothetical protein predicted by censec expressed protein                              | 143  | 193  | 246  | 234  | 251  | 178  | 233  | 0.75 | 0.039373 | 174      | 175  | 190  | 259  | 212  | 198  | 206  | 195  | 180  | 214  | 198  | 0.75     | 0.075616 | 223  | 0.84     | 0.085904 |
| 256989_at   | A13g28560 | hyothetical protein predicted by censec dynamin family protein                         | 39   | 54   | 45   | 41   | 66   | 44   | 46   | 51   | 0.91     | 0.628685 | 12   | 17   | 17   | 12   | 11   | 8    | 7    | 16   | 9    | 17   | 1.01     | 0.13476  | 10   | 1.51     | 0.070398 |
| 256988_s_at | A13g28715 | adenosine triphosphatase, putative sin H+-transportin two-sector ATPase, out           | 587  | 855  | 875  | 908  | 960  | 765  | 772  | 878  | 0.88     | 0.391353 | 740  | 773  | 767  | 1197 | 856  | 785  | 997  | 942  | 760  | 955  | 0.80     | 0.083335 | 946  | 0.80     | 0.218452 |
| 256989_at   | A13g28580 | hyothetical protein predicted by censec AAA-type ATPase family protein                 | 58   | 54   | 66   | 50   | 62   | 37   | 59   | 49   | 1.20     | 0.282378 | 20   | 17   | 20   | 27   | 12   | 15   | 12   | 11   | 19   | 13   | 1.46     | 0.011113 | 15   | 1.32     | 0.049586 |
| 256990_at   | A13g28590 | hyothetical protein predicted by censec dynamin family protein                         | 173  | 266  | 266  | 248  | 311  | 216  | 235  | 258  | 0.91     | 0.605851 | 172  | 126  | 149  | 162  | 126  | 135  | 146  | 154  | 149  | 145  | 1.03     | 0.731773 | 141  | 1.06     | 0.659023 |
| 256991_at   | A13g28600 | unknown protein                                                                        | 31   | 31   | 36   | 48   | 45   | 47   | 36   | 47   | 0.77     | 0.075215 | 26   | 17   | 27   | 28   | 28   | 28   | 28   | 28   | 28   | 28   | 0.84     | 0.098475 | 27   | 0.86     | 0.270549 |
| 256992_at   | A13g28630 | hyothetical protein predicted by censec expressed protein                              | 29   | 31   | 35   | 31   | 34   | 34   | 37   | 32   | 0.93     | 0.350622 | 28   | 29   | 35   | 35   | 24   | 32   | 33   | 33   | 31   | 31   | 0.98     | 0.805322 | 30   | 1.01     | 0.937520 |
| 256993_at   | A13g28670 | hyothetical protein : supported by cDNA: expressed protein                             | 226  | 249  | 300  | 304  | 334  | 266  | 258  | 302  | 0.86     | 0.216353 | 245  | 230  | 253  | 332  | 314  | 260  | 292  | 282  | 243  | 296  | 0.82     | 0.021186 | 302  | 0.80     | 0.098904 |
| 256994_s_at | A13g28830 | limonene cyclase, putative similar to R myrcenolimonene cyclase, putative              | 25   | 28   | 31   | 33   | 35   | 32   | 28   | 33   | 0.85     | 0.071178 | 22   | 29   | 26   | 23   | 23   | 23   | 23   | 23   | 23   | 26   | 0.98     | 0.915350 | 23   | 1.12     | 0.247180 |
| 256995_at   | A13g28540 | protein kinase, putative contains simila protein kinase family protein                 | 290  | 368  | 430  | 461  | 383  | 298  | 330  | 0.80 | 0.210923 | 217      | 168  | 206  | 263  | 215  | 203  | 215  | 231  | 240  | 197  | 215  | 0.87     | 0.043701 | 237  | 0.83     | 0.124718 |
| 256996_at   | A13g28550 | unknown protein similar to unknown chr DC1 domain-containing protein                   | 11   | 15   | 13   | 15   | 19   | 15   | 13   | 17   | 0.78     | 0.085167 | 11   | 9    | 15   | 12   | 15   | 15   | 15   | 13   | 12   | 15   | 0.81     | 0.206831 | 14   | 0.86     | 0.389087 |
| 256997_at   |           |                                                                                        |      |      |      |      |      |      |      |      |          |          |      |      |      |      |      |      |      |      |      |      |          |          |      |          |          |

|             |           |                                                                                    |     |      |      |      |      |      |     |      |          |          |     |      |      |      |      |      |      |      |      |      |      |          |          |      |          |          |
|-------------|-----------|------------------------------------------------------------------------------------|-----|------|------|------|------|------|-----|------|----------|----------|-----|------|------|------|------|------|------|------|------|------|------|----------|----------|------|----------|----------|
| 256952_at   | A13g21160 | mannosidase, putative similar to mann mannosyl-oligosaccharide 1,2-alpha-m         | 89  | 107  | 113  | 123  | 137  | 102  | 103 | 121  | 0.85     | 0.229671 | 82  | 89   | 92   | 118  | 101  | 87   | 106  | 96   | 88   | 102  | 0.86 | 0.096316 | 102      | 0.86 | 0.195823 |          |
| 256953_at   | A13g29630 | flavonol 3-O-Glucosyltransferase, putative glycosyltransferase family protein      | 24  | 23   | 34   | 32   | 33   | 35   | 27  | 33   | 0.81     | 0.140743 | 19  | 17   | 21   | 27   | 16   | 18   | 24   | 25   | 19   | 22   | 0.87 | 0.350879 | 20       | 0.93 | 0.717504 |          |
| 256923_at   | A13g29635 | hydropetal protein                                                                 | 30  | 31   | 34   | 41   | 37   | 38   | 32  | 39   | 0.82     | 0.025373 | 20  | 22   | 27   | 22   | 24   | 21   | 26   | 24   | 23   | 24   | 0.86 | 0.855749 | 23       | 1.01 | 0.933562 |          |
| 256924_at   | A13g29590 | Arthrobacter 5-aromatic acyltransferase family protein                             | 27  | 21   | 34   | 32   | 36   | 33   | 31  | 34   | 0.76     | 0.082551 | 21  | 21   | 27   | 28   | 24   | 27   | 23   | 24   | 23   | 24   | 1.01 | 0.658071 | 23       | 0.89 | 0.805926 |          |
| 256925_at   | A13g29625 | hydropetal protein predicted by oener hydropetal protein /// ovens-like retrov     | 3   | 4    | 6    | 3    | 4    | 4    | 4   | 4    | 1.06     | 0.840316 | 5   | 3    | 2    | 3    | 2    | 4    | 2    | 9    | 1    | 3    | 0.97 | 0.953302 | 3        | 1.23 | 0.564646 |          |
| 256926_at   | A13g22540 | unknown protein predicted by oener expressed protein                               | 74  | 84   | 90   | 222  | 215  | 192  | 83  | 210  | 0.39     | 0.000284 | 112 | 101  | 107  | 380  | 299  | 269  | 203  | 199  | 107  | 270  | 0.40 | 0.010757 | 316      | 0.34 | 0.003322 |          |
| 256927_at   | A13g22550 | unknown protein                                                                    | 65  | 123  | 83   | 403  | 562  | 494  | 90  | 516  | 0.18     | 0.000118 | 100 | 90   | 105  | 616  | 459  | 438  | 326  | 309  | 98   | 428  | 0.23 | 0.004169 | 502      | 0.20 | 0.002203 |          |
| 256928_at   | A13g22590 | unknown protein                                                                    | 237 | 342  | 424  | 424  | 427  | 404  | 341 | 404  | 0.76     | 0.082551 | 278 | 311  | 281  | 463  | 362  | 389  | 360  | 338  | 360  | 379  | 0.40 | 0.01752  | 386      | 0.78 | 0.076189 |          |
| 256929_at   | A13g22810 | unknown protein                                                                    | 28  | 32   | 48   | 47   | 46   | 40   | 36  | 44   | 0.82     | 0.286730 | 26  | 24   | 30   | 32   | 26   | 32   | 31   | 29   | 27   | 30   | 0.89 | 0.163258 | 30       | 0.89 | 0.301827 |          |
| 256930_at   | A13g22460 | O-acetylserine(thiol) lyase, putative sin cysteine synthase, putative / O-acetyl   | 39  | 50   | 53   | 61   | 62   | 52   | 47  | 55   | 0.86     | 0.222768 | 42  | 38   | 45   | 39   | 40   | 46   | 40   | 42   | 41   | 41   | 1.03 | 0.602030 | 39       | 1.07 | 0.237958 |          |
| 256931_at   | A13g22490 | LEA protein, putative similar to LEA on late embryogenesis abundant protein, o     | 24  | 21   | 22   | 96   | 26   | 25   | 22  | 49   | 0.45     | 0.314008 | 21  | 24   | 26   | 23   | 22   | 26   | 29   | 21   | 24   | 24   | 0.98 | 0.808578 | 24       | 1.01 | 0.942211 |          |
| 256932_at   | A13g22520 | unknown protein                                                                    | 366 | 425  | 416  | 494  | 518  | 412  | 402 | 475  | 0.85     | 0.121797 | 313 | 344  | 400  | 497  | 421  | 225  | 450  | 465  | 352  | 432  | 0.82 | 0.116776 | 414      | 0.85 | 0.329930 |          |
| 256933_at   | A13g22500 | unknown protein contains Pfam profile: protease inhibitor/seed storage/lipid tra   | 30  | 34   | 68   | 72   | 62   | 64   | 64  | 43   | 0.76     | 0.018255 | 27  | 31   | 32   | 36   | 35   | 34   | 30   | 30   | 33   | 34   | 0.91 | 0.237119 | 34       | 0.88 | 0.214040 |          |
| 256934_at   | A13g22530 | unknown protein contains Pfam profile: expressed protein                           | 138 | 221  | 218  | 267  | 250  | 206  | 192 | 241  | 0.80     | 0.208750 | 173 | 170  | 194  | 321  | 231  | 247  | 249  | 237  | 179  | 257  | 0.70 | 0.013055 | 266      | 0.67 | 0.037666 |          |
| 256935_at   | A13g22570 | unknown protein, supported by full-lenq unknown protein, supported by full-lenq    | 31  | 36   | 49   | 44   | 44   | 40   | 39  | 43   | 0.91     | 0.522145 | 26  | 29   | 36   | 29   | 26   | 34   | 32   | 33   | 30   | 31   | 0.98 | 0.866506 | 30       | 1.02 | 0.912879 |          |
| 256936_at   | A13g22480 | orefidin-like protein similar to orefidin orefidin-related KE2 family protein      | 422 | 505  | 504  | 599  | 585  | 524  | 477 | 569  | 0.84     | 0.060571 | 561 | 595  | 601  | 862  | 705  | 657  | 652  | 621  | 586  | 703  | 0.83 | 0.108370 | 748      | 0.78 | 0.079510 |          |
| 256937_at   | A13g22520 | hydropetal protein predicted by oener protease inhibitor/seed storage/lipid tra    | 76  | 72   | 95   | 100  | 92   | 82   | 81  | 92   | 0.88     | 0.238035 | 62  | 56   | 63   | 68   | 62   | 59   | 54   | 65   | 67   | 61   | 1.00 | 0.429902 | 63       | 1.07 | 0.641746 |          |
| 256938_at   | A13g22500 | LEA protein, putative similar to LEA on late embryogenesis abundant protein (E     | 20  | 20   | 19   | 201  | 23   | 22   | 20  | 82   | 0.24     | 0.351796 | 18  | 17   | 20   | 17   | 16   | 23   | 22   | 23   | 18   | 20   | 0.91 | 0.419976 | 19       | 0.98 | 0.880523 |          |
| 256939_at   | A13g22630 | multicatalytic endopeptidase complex, 20S proteasome beta subunit D (PBD1)         | 828 | 1000 | 1032 | 1150 | 1275 | 1087 | 954 | 1171 | 0.81     | 0.060977 | 998 | 1169 | 1168 | 1600 | 1177 | 1140 | 1198 | 1169 | 1112 | 1257 | 0.88 | 0.280197 | 1306     | 0.85 | 0.286871 |          |
| 256940_at   | A13g30720 | unknown protein                                                                    | 19  | 23   | 29   | 28   | 33   | 28   | 24  | 30   | 0.80     | 0.151144 | 17  | 19   | 20   | 20   | 13   | 17   | 22   | 15   | 19   | 17   | 1.07 | 0.621300 | 17       | 1.11 | 0.416752 |          |
| 256941_at   | A13g30710 | hydropetal protein                                                                 | 31  | 41   | 41   | 32   | 40   | 37   | 38  | 36   | 1.04     | 0.720557 | 45  | 38   | 39   | 38   | 41   | 39   | 62   | 43   | 41   | 45   | 0.91 | 0.537164 | 39       | 1.03 | 0.619205 |          |
| 256942_at   | A13g23290 | hydropetal protein similar to unknown hydropetal protein similar to unknown t      | 41  | 39   | 45   | 51   | 44   | 41   | 42  | 45   | 0.92     | 0.376289 | 45  | 37   | 46   | 35   | 49   | 41   | 41   | 34   | 42   | 40   | 1.07 | 0.560707 | 42       | 1.02 | 0.866671 |          |
| 256943_at   | A13g18910 | hydropetal protein similar to hydropeti F-box family protein                       | 241 | 337  | 325  | 362  | 368  | 275  | 301 | 335  | 0.90     | 0.468372 | 315 | 268  | 308  | 484  | 334  | 323  | 429  | 385  | 297  | 391  | 0.76 | 0.062815 | 380      | 0.78 | 0.195379 |          |
| 256944_at   | A13g18990 | unknown protein similar to unknown or transcriptional factor B3 family protein     | 390 | 504  | 443  | 624  | 617  | 511  | 446 | 584  | 0.76     | 0.048554 | 497 | 445  | 497  | 679  | 600  | 523  | 598  | 565  | 480  | 593  | 0.81 | 0.020981 | 601      | 0.80 | 0.060603 |          |
| 256945_at   | A13g19020 | hydropetal protein similar to extensin- leucine-rich repeat family protein / exten | 18  | 21   | 24   | 20   | 21   | 17   | 21  | 19   | 1.09     | 0.423808 | 18  | 23   | 25   | 13   | 15   | 15   | 17   | 15   | 22   | 15   | 1.47 | 0.005763 | 14       | 1.54 | 0.019986 |          |
| 256946_at   | A13g19040 | hydropetal protein contains Pfam prof ubiquitin family protein                     | 20  | 30   | 35   | 33   | 32   | 33   | 28  | 33   | 0.87     | 0.375034 | 23  | 31   | 32   | 22   | 19   | 17   | 25   | 24   | 29   | 21   | 1.35 | 0.038881 | 19       | 1.48 | 0.040805 |          |
| 256947_at   | A13g19050 | hydropetal protein contains Pfam prof kinesin motor protein-related                | 19  | 16   | 24   | 25   | 22   | 27   | 20  | 24   | 0.82     | 0.186927 | 12  | 13   | 23   | 15   | 15   | 17   | 17   | 17   | 16   | 16   | 0.97 | 0.867139 | 16       | 0.99 | 0.978594 |          |
| 256948_at   | A13g18920 | unknown protein                                                                    | 187 | 260  | 249  | 217  | 267  | 203  | 232 | 229  | 1.01     | 0.928026 | 150 | 163  | 155  | 202  | 145  | 18   | 163  | 160  | 187  | 156  | 172  | 0.90     | 0.254990 | 171  | 0.91     | 0.386212 |
| 256949_at   | A13g19070 | hydropetal protein predicted by oener cell wall protein-related                    | 11  | 13   | 18   | 16   | 14   | 13   | 14  | 15   | 0.94     | 0.730350 | 10  | 13   | 13   | 14   | 10   | 11   | 11   | 14   | 12   | 12   | 0.98 | 0.863094 | 12       | 1.01 | 0.911011 |          |
| 256950_at   | A13g19080 | hydropetal protein similar to hydropeti SWiB complex BAF50a domain-containi        | 49  | 53   | 68   | 72   | 62   | 64   | 72  | 82   | 0.82     | 0.084672 | 50  | 52   | 62   | 52   | 56   | 52   | 62   | 58   | 58   | 62   | 0.82 | 0.448662 | 57       | 0.84 | 0.194369 |          |
| 256951_at   | A13g19085 | hydropetal protein predicted by oener hydropetal protein                           | 25  | 32   | 32   | 30   | 31   | 26   | 31  | 26   | 1.05     | 0.256498 | 25  | 25   | 28   | 32   | 21   | 29   | 28   | 25   | 26   | 27   | 0.95 | 0.639915 | 27       | 0.94 | 0.664079 |          |
| 256952_at   | A13g18930 | unknown protein contains Pfam profile: zinc finger (C3HC4-type RING finger) fa     | 69  | 96   | 88   | 85   | 101  | 82   | 84  | 89   | 0.94     | 0.647814 | 64  | 63   | 67   | 71   | 72   | 61   | 62   | 63   | 65   | 66   | 0.98 | 0.753926 | 68       | 0.95 | 0.454416 |          |
| 256953_at   | A13g18960 | hydropetal protein similar to hydropeti transmembrane protein B3 family protein    | 141 | 265  | 248  | 203  | 226  | 156  | 218 | 195  | 1.12     | 0.625946 | 196 | 289  | 219  | 358  | 240  | 273  | 322  | 317  | 235  | 302  | 0.78 | 0.079423 | 290      | 0.81 | 0.284659 |          |
| 256954_at   | A13g18970 | hydropetal protein predicted by oener pentatricopeptide (PPR) repeat-containi      | 39  | 44   | 52   | 57   | 58   | 40   | 45  | 55   | 0.82     | 0.112762 | 35  | 35   | 43   | 47   | 40   | 49   | 51   | 38   | 45   | 51   | 0.94 | 0.659921 | 53       | 0.94 | 0.305674 |          |
| 256955_at   | A13g18980 | hydropetal protein predicted by oener F-box family protein                         | 259 | 337  | 315  | 341  | 353  | 272  | 304 | 322  | 0.94     | 0.622030 | 248 | 234  | 291  | 329  | 284  | 261  | 282  | 286  | 258  | 288  | 0.89 | 0.146654 | 291      | 0.88 | 0.269360 |          |
| 256956_at   | A13g18940 | unknown protein, supported by full-lenq class12-related                            | 301 | 392  | 383  | 436  | 438  | 355  | 359 | 409  | 0.88     | 0.270046 | 378 | 361  | 366  | 561  | 463  | 463  | 423  | 381  | 368  | 448  | 0.82 | 0.105255 | 479      | 0.77 | 0.066975 |          |
| 256957_at   | A13g19010 | hydropetal protein contains similarity oxidoreductase, 2OG-Fe(II) oxynase I        | 197 | 202  | 257  | 312  | 258  | 239  | 219 | 270  | 0.81     | 0.154304 | 198 | 230  | 222  | 331  | 251  | 204  | 246  | 254  | 217  | 257  | 0.84 | 0.200196 | 262      | 0.83 | 0.300864 |          |
| 256958_at   | A13g19000 | hydropetal protein contains similarity oxidoreductase, 2OG-Fe(II) oxynase I        | 121 | 137  | 144  | 226  | 179  | 163  | 134 | 189  | 0.71     | 0.051361 | 203 | 200  | 233  | 356  | 238  | 288  | 255  | 229  | 215  | 257  | 0.84 | 0.278031 | 267      | 0.81 | 0.321649 |          |
| 256959_x_at | A13g30660 | unknown protein                                                                    | 18  | 24   | 25   | 15   | 35   | 32   | 22  | 27   | 0.82     | 0.498255 | 12  | 19   | 14   | 17   | 12   | 11   | 18   | 17   | 15   | 15   | 1.04 | 0.820363 | 13       | 1.17 | 0.460313 |          |
| 256960_at   | A13g21870 | PREK-like protein, putative similar to F cyclin family protein                     | 30  | 46   | 45   | 47   | 51   | 52   | 40  | 50   | 0.80     | 0.142845 | 31  | 35   | 45   | 38   | 35   | 35   | 50   | 39   | 37   | 39   | 0.94 | 0.645534 | 36       | 1.03 | 0.786431 |          |
| 256961_at   | A13g24680 | zinc-finger protein, putative almost ide non-LTR retrotransposon family (LINE) /   | 40  | 35   | 40   | 56   | 53   | 56   | 58  | 44   | 0.55     | 0.134023 | 29  | 37   | 30   | 35   | 36   | 31   | 39   | 32   | 34   | 36   | 0.96 | 0.629923 | 36       | 0.90 | 0.246978 |          |
| 256962_at   | A13g24630 | hydropetal protein predicted by oener hydropetal protein                           | 60  | 60   | 60   | 69   | 68   | 53   | 79  | 0.68 | 0.025855 | 48       | 45  | 62   | 52   | 67   | 67   | 65   | 60   | 62   | 67   | 77   | 0.77 | 0.029873 | 71       | 0.73 | 0.027655 |          |
| 256963_at   | A13g24640 | hydropetal protein predicted by oener hydropetal protein                           | 13  | 10   | 13   | 13   | 13   | 12   | 12  | 12   | 0.99     | 0.891341 | 11  | 7    | 12   | 11   | 14   | 10   | 15   | 8    | 10   | 11   | 0.89 | 0.555750 | 11       | 0.89 | 0.506633 |          |
| 256964_at   | A13g24650 | absisic acid-insensitive protein 3 iden absisic acid-insensitive protein 3 (ABI3)  | 25  | 27   | 32   | 31   | 36   | 31   | 28  | 33   | 0.86     | 0.174818 | 21  | 27   | 27   | 25   | 27   | 28   | 24   | 23   | 25   | 25   | 1.00 | 0.950937 | 26       | 0.96 | 0.615887 |          |
| 256965_at   | A13g24660 | putative kinase-like protein TMK1.1 ore leucine-rich repeat transmembrane prot     | 297 | 345  | 352  | 429  | 476  | 400  | 331 | 435  | 0.76     | 0.020839 | 254 | 201  | 255  | 336  | 294  | 241  | 303  | 291  | 237  | 293  | 0.81 | 0.059876 | 290      | 0.82 | 0.179680 |          |
| 256966_at   | A13g24670 | pectate lyase, putative similar to pectate lyase family protein                    | 61  | 91   | 81   | 95   | 103  | 75   | 37  | 81   | 0.88     | 0.058391 | 85  | 67   | 83   | 138  | 102  | 98   | 104  | 98   | 104  | 98   | 1.07 | 0.073788 | 112      | 0.76 | 0.026660 |          |
| 256967_at   | A13g30800 | hydropetal protein contains similarity l gypsy-like retrotransposon family         | 16  | 18   | 24   | 25   | 21   | 24   | 20  | 24   | 0.83     | 0.193392 | 14  | 16   | 17   | 22   | 17   | 15   | 17   | 16   | 16   | 17   | 0.89 | 0.271347 | 18       | 0.85 | 0.265323 |          |
| 256968_x_at | A13g23910 | HAPp48.5 protein identical to HAPp48 non-LTR retrotransposon family (LINE) /       | 338 | 427  | 438  | 486  | 517  | 385  | 401 | 463  | 0.87     | 0.293011 | 386 | 375  | 424  | 601  | 473  | 438  | 415  | 399  | 395  | 465  | 0.85 | 0.205099 | 504      | 0.78 | 0.103120 |          |
| 256969_at   | A13g23960 | hydropetal protein                                                                 | 20  | 18   | 20   | 23   | 18   | 18   | 20  | 0.89 |          |          |     |      |      |      |      |      |      |      |      |      |      |          |          |      |          |          |

|             |           |                                                                                           |     |     |     |     |     |     |     |          |          |          |          |     |     |     |     |     |      |          |      |          |          |          |          |          |          |          |
|-------------|-----------|-------------------------------------------------------------------------------------------|-----|-----|-----|-----|-----|-----|-----|----------|----------|----------|----------|-----|-----|-----|-----|-----|------|----------|------|----------|----------|----------|----------|----------|----------|----------|
| 256858_at   | A13g15140 | hypothetical protein predicted by gene-exonuclease family protein                         | 125 | 146 | 157 | 172 | 203 | 165 | 143 | 180      | 0.79     | 0.068283 | 133      | 131 | 150 | 197 | 169 | 142 | 134  | 121      | 138  | 153      | 0.90     | 0.460203 | 169      | 0.82     | 0.139702 |          |
| 256859_at   | A13g22940 | hypothetical protein                                                                      | 20  | 23  | 32  | 27  | 33  | 26  | 25  | 29       | 0.86     | 0.380519 | 18       | 15  | 19  | 14  | 19  | 16  | 19   | 18       | 17   | 17       | 1.02     | 0.845562 | 16       | 1.08     | 0.559040 |          |
| 256828_at   | A13g22970 | unknown protein                                                                           | 371 | 581 | 443 | 473 | 629 | 394 | 465 | 499      | 0.93     | 0.732624 | 328      | 300 | 345 | 338 | 424 | 326 | 328  | 320      | 324  | 347      | 0.94     | 0.449366 | 363      | 0.89     | 0.318731 |          |
| 256829_at   | A13g22980 | hypothetical protein similar to aluminum-activated acid phosphatase                       | 293 | 468 | 463 | 463 | 598 | 297 | 340 | 364      | 0.97     | 0.010466 | 415      | 415 | 431 | 431 | 431 | 431 | 431  | 431      | 431  | 431      | 0.95     | 0.260151 | 511      | 0.85     | 0.170177 |          |
| 256830_at   | A13g22980 | eukaryotic translation initiation factor 3 eukaryotic translation initiation factor 3 s   | 51  | 50  | 73  | 67  | 68  | 56  | 58  | 64       | 0.91     | 0.540550 | 68       | 57  | 62  | 71  | 62  | 45  | 60   | 58       | 62   | 59       | 1.04     | 0.673793 | 60       | 1.04     | 0.782119 |          |
| 256831_at   | A13g22870 | hypothetical protein                                                                      | 29  | 33  | 39  | 36  | 35  | 40  | 34  | 37       | 0.91     | 0.374007 | 27       | 28  | 34  | 32  | 22  | 31  | 29   | 30       | 30   | 29       | 1.04     | 0.742511 | 28       | 1.05     | 0.728964 |          |
| 256832_at   | A13g22880 | meiotic recombination protein (ADMC meiotic recombination protein, putative               | 197 | 213 | 216 | 238 | 290 | 208 | 209 | 245      | 0.85     | 0.208016 | 186      | 139 | 209 | 180 | 199 | 157 | 125  | 120      | 178  | 156      | 1.14     | 0.424489 | 179      | 1.00     | 0.978950 |          |
| 256833_at   | A13g22880 | ADP-stimulated calcium ATPase catalytic subunit 1 (ATPase, plasma m                       | 136 | 110 | 111 | 122 | 126 | 108 | 110 | 127      | 0.68     | 0.165444 | 70       | 66  | 73  | 75  | 63  | 64  | 72   | 63       | 64   | 72       | 1.02     | 0.817340 | 67       | 1.08     | 0.630622 |          |
| 256834_at   | A13g22920 | cyclocholin, putative similar to cyclocholin peptidyl-ornithyl cis-trans isomerase, outal | 47  | 63  | 75  | 68  | 70  | 60  | 58  | 66       | 0.88     | 0.428029 | 45       | 34  | 43  | 41  | 35  | 36  | 47   | 41       | 40   | 40       | 1.01     | 0.950030 | 37       | 1.08     | 0.466315 |          |
| 256835_at   | A13g22890 | ATP sulfurylase, putative similar to ATP sulfate adenylyltransferase 1 / ATP-sulfur       | 476 | 382 | 467 | 527 | 481 | 466 | 442 | 491      | 0.50     | 0.232444 | 326      | 358 | 375 | 480 | 417 | 349 | 406  | 381      | 353  | 407      | 0.87     | 0.134401 | 415      | 0.85     | 0.199760 |          |
| 256836_at   | A13g22960 | ovulate kinase, putative similar to ovr pyruvate kinase, putative                         | 502 | 650 | 647 | 684 | 779 | 547 | 600 | 670      | 0.90     | 0.445810 | 598      | 550 | 548 | 684 | 814 | 648 | 833  | 830      | 565  | 797      | 0.71     | 0.005203 | 782      | 0.72     | 0.039891 |          |
| 256837_at   | A13g22900 | hypothetical protein similar to DNA-re RNA codonmase Rob7 N-terminal dome                 | 532 | 640 | 312 | 352 | 367 | 300 | 285 | 340      | 0.97     | 0.063556 | 282      | 288 | 316 | 439 | 368 | 338 | 304  | 330      | 299  | 356      | 0.84     | 0.120191 | 381      | 0.78     | 0.056677 |          |
| 256838_at   | A13g22950 | ADP-ribosylation factor, putative simla ADP-ribosylation factor, putative                 | 303 | 318 | 420 | 384 | 329 | 289 | 378 | 0.76     | 0.091245 | 292      | 290      | 290 | 463 | 380 | 351 | 370 | 340  | 386      | 376  | 405      | 0.73     | 0.050753 |          |          |          |          |
| 256839_at   | A13g22930 | calmodulin, putative similar to calmodu, calmodulin, putative                             | 29  | 26  | 33  | 30  | 36  | 30  | 32  | 0.92     | 0.435271 | 41       | 50       | 43  | 48  | 53  | 39  | 51  | 44   | 45       | 47   | 0.95     | 0.619286 | 47       | 0.96     | 0.745664 |          |          |
| 256840_x_at | A13g23000 | unknown protein similar to putative Ath1 gypsy-like retrotransposon family (Atheta        | 26  | 25  | 31  | 26  | 32  | 27  | 27  | 29       | 0.96     | 0.732117 | 15       | 17  | 15  | 21  | 15  | 14  | 20   | 19       | 16   | 18       | 0.86     | 0.172598 | 18       | 0.88     | 0.401364 |          |
| 256841_x_at | A13g23020 | hypothetical protein predicted by oener hypothetical protein /// hypothetical crote       | 37  | 47  | 57  | 57  | 66  | 50  | 47  | 58       | 0.82     | 0.239777 | 21       | 22  | 30  | 30  | 23  | 27  | 32   | 29       | 24   | 28       | 0.87     | 0.245691 | 26       | 0.92     | 0.585540 |          |
| 256842_at   | A13g31930 | hypothetical protein predicted by oener hypothetical protein                              | 24  | 28  | 27  | 28  | 33  | 25  | 26  | 29       | 0.92     | 0.390813 | 19       | 25  | 23  | 20  | 16  | 17  | 24   | 14       | 22   | 18       | 1.22     | 0.175570 | 18       | 1.24     | 0.133899 |          |
| 256843_at   | A13g31940 | hypothetical protein predicted by oener hypothetical protein                              | 16  | 18  | 19  | 20  | 23  | 21  | 18  | 21       | 0.84     | 0.068061 | 11       | 13  | 18  | 14  | 13  | 12  | 15   | 12       | 14   | 13       | 1.06     | 0.664180 | 13       | 1.07     | 0.694885 |          |
| 256844_s_at | A13g31955 | En/Spm transposon protein, putative s hypothetical protein /// CACTA-like trans           | 13  | 13  | 12  | 12  | 23  | 9   | 13  | 15       | 0.86     | 0.658812 | 11       | 13  | 14  | 8   | 9   | 8   | 9    | 8        | 12   | 9        | 1.44     | 0.002100 | 9        | 1.45     | 0.014285 |          |
| 256845_x_at | A13g31970 | hypothetical protein similar to putative r gypsy-like retrotransposon family /// gyp      | 42  | 52  | 56  | 42  | 86  | 47  | 50  | 52       | 0.96     | 0.829751 | 1        | 32  | 37  | 35  | 32  | 31  | 37   | 33       | 34   | 34       | 1.00     | 0.988990 | 33       | 1.03     | 0.703010 |          |
| 256846_at   | A13g27980 | pectin methylesterase, putative similar pectin methylesterase, putative /// pectin        | 1   | 2   | 0   | 1   | 2   | 0   | 1   | 0.60     | 0.411135 | 1        | 5        | 3   | 2   | 1   | 3   | 2   | 1    | 3        | 2    | 2        | 1.96     | 0.140310 | 1        | 2.42     | 0.185916 |          |
| 256847_at   | A13g27950 | early nucleotide-specific protein, putative r early nucleotide-specific protein, putative | 21  | 26  | 27  | 25  | 27  | 23  | 26  | 28       | 0.85     | 0.150599 | 22       | 20  | 26  | 25  | 23  | 21  | 25   | 20       | 23   | 23       | 0.99     | 0.908233 | 23       | 0.97     | 0.773349 |          |
| 256848_at   | A13g27960 | hypothetical protein similar to hvotheti kinase light chain-related                       | 58  | 59  | 68  | 55  | 65  | 62  | 58  | 1.06     | 0.501718 | 65       | 69       | 56  | 58  | 47  | 51  | 58  | 55   | 63       | 54   | 1.17     | 0.062783 | 52       | 1.22     | 0.090003 |          |          |
| 256849_at   | A13g27990 | hypothetical protein similar to hvotheti hypothetical protein similar to hvotheti         | 14  | 18  | 18  | 12  | 16  | 14  | 15  | 0.92     | 0.674489 | 15       | 17       | 21  | 13  | 17  | 15  | 12  | 14   | 13       | 14   | 12       | 1.43     | 0.017767 | 12       | 1.51     | 0.043451 |          |
| 256850_at   | A13g28000 | hypothetical protein similar to hvotheti hypothetical protein similar to hvotheti         | 15  | 20  | 23  | 22  | 28  | 24  | 19  | 24       | 0.79     | 0.164711 | 15       | 17  | 22  | 17  | 15  | 12  | 15   | 18       | 16   | 1.12     | 0.504210 | 15       | 1.22     | 0.220046 |          |          |
| 256851_at   | A13g27930 | hypothetical protein predicted by oener expressed protein                                 | 353 | 492 | 492 | 622 | 719 | 517 | 446 | 619      | 0.72     | 0.080471 | 333      | 297 | 379 | 574 | 470 | 442 | 485  | 464      | 336  | 487      | 0.69     | 0.005016 | 495      | 0.68     | 0.026880 |          |
| 256852_at   | A13g18610 | unknown protein contains Pfam profile: nucleolin, putative                                | 82  | 113 | 83  | 96  | 86  | 88  | 100 | 0.993896 | 85       | 81       | 96       | 75  | 66  | 64  | 72  | 67  | 87   | 69       | 1.27 | 0.004473 | 68       | 1.28     | 0.027626 |          |          |          |
| 256853_at   | A13g18640 | hypothetical protein predicted by oener zinc finger protein-related                       | 236 | 292 | 257 | 322 | 366 | 262 | 314 | 0.83     | 0.213494 | 238      | 212      | 257 | 351 | 279 | 253 | 286 | 258  | 235      | 286  | 0.82     | 0.094799 | 295      | 0.80     | 0.139166 |          |          |
| 256826_at   | A13g18540 | hypothetical protein predicted by oener expressed protein                                 | 27  | 37  | 44  | 41  | 41  | 37  | 37  | 40       | 0.93     | 0.574994 | 25       | 28  | 31  | 31  | 28  | 31  | 0.91 | 0.143799 | 28   | 0.99     | 0.895890 |          |          |          |          |          |
| 256827_at   | A13g18570 | hypothetical protein contains similar 1 glycine-rich protein / oleosin                    | 27  | 28  | 27  | 27  | 27  | 27  | 27  | 27       | 0.94     | 0.216562 | 24       | 24  | 24  | 24  | 24  | 24  | 24   | 24       | 24   | 24       | 0.91     | 0.081161 | 24       | 0.96     | 0.035777 |          |
| 256797_at   | A13g18630 | DEAD box helicase protein, putative s1 DEAD/DEAH box helicase, putative                   | 619 | 676 | 646 | 715 | 679 | 624 | 622 | 673      | 0.92     | 0.155730 | 623      | 509 | 688 | 806 | 686 | 612 | 693  | 680      | 607  | 696      | 0.87     | 0.167362 | 702      | 0.86     | 0.285396 |          |
| 256798_at   | A13g18630 | uracil-DNA glycosylase, putative simla uracil DNA glycosylase family protein              | 83  | 103 | 92  | 102 | 136 | 144 | 123 | 93       | 134      | 0.69     | 0.006811 | 94  | 94  | 107 | 137 | 115 | 113  | 99       | 94   | 98       | 1.12     | 0.88     | 0.259023 | 122      | 0.81     | 0.061703 |
| 256799_at   | A13g18560 | unknown protein - supported by cDNA: expressed protein                                    | 88  | 103 | 99  | 96  | 85  | 80  | 87  | 87       | 1.00     | 0.998766 | 254      | 285 | 288 | 243 | 170 | 157 | 188  | 178      | 275  | 187      | 1.47     | 0.006271 | 190      | 1.45     | 0.042416 |          |
| 256800_at   | A13g20900 | cytochrome P450, putative similar to c pseudocrome, cytochrome P450                       | 58  | 72  | 83  | 84  | 62  | 68  | 70  | 83       | 0.89     | 0.409002 | 47       | 62  | 64  | 56  | 54  | 53  | 58   | 54       | 53   | 58       | 1.07     | 0.401445 | 54       | 1.06     | 0.598652 |          |
| 256801_at   | A13g20940 | cytochrome P450, putative similar to c pseudocrome, cytochrome P450                       | 14  | 13  | 17  | 15  | 18  | 16  | 15  | 16       | 0.90     | 0.322422 | 10       | 13  | 17  | 15  | 15  | 10  | 11   | 10       | 14   | 12       | 1.12     | 0.526250 | 13       | 1.02     | 0.920441 |          |
| 256802_at   | A13g20950 | cytochrome P450, putative similar to c cytochrome P450 family protein                     | 21  | 23  | 23  | 28  | 21  | 22  | 27  | 0.84     | 0.253234 | 34       | 48       | 41  | 39  | 27  | 29  | 39  | 37   | 41       | 34   | 1.20     | 0.179321 | 32       | 1.30     | 0.160705 |          |          |
| 256803_at   | A13g20960 | cytochrome P450, putative similar to c cytochrome P450 family protein                     | 23  | 18  | 20  | 18  | 26  | 20  | 20  | 21       | 0.95     | 0.720139 | 17       | 17  | 23  | 17  | 16  | 15  | 19   | 21       | 19   | 18       | 1.10     | 0.387083 | 18       | 1.20     | 0.162051 |          |
| 256804_at   | A13g20920 | hypothetical protein predicted by oener hypothetical protein-related                      | 654 | 720 | 769 | 801 | 870 | 670 | 687 | 780      | 0.88     | 0.335652 | 679      | 670 | 722 | 679 | 947 | 741 | 692  | 748      | 659  | 694      | 0.73     | 0.460573 | 743      | 0.79     | 0.277992 |          |
| 256805_at   | A13g20930 | hypothetical protein contains similarity to r RNA recognition motif (RRM)-containing      | 75  | 111 | 120 | 124 | 123 | 112 | 102 | 120      | 0.85     | 0.285596 | 75       | 99  | 112 | 125 | 95  | 85  | 107  | 98       | 95   | 102      | 0.93     | 0.586988 | 102      | 0.93     | 0.702917 |          |
| 256806_at   | A13g20910 | CCAAT-binding factor B chain, outative CCAAT-binding transcription factor (CBF            | 64  | 79  | 80  | 113 | 114 | 94  | 74  | 70       | 0.77     | 0.016985 | 80       | 93  | 93  | 102 | 106 | 91  | 99   | 91       | 89   | 101      | 0.87     | 0.160274 | 106      | 0.84     | 0.141669 |          |
| 256807_at   | A13g20970 | hypothetical protein contains Pfam profile: NCAAT-binding NRU-like family protein         | 179 | 242 | 251 | 261 | 312 | 228 | 224 | 267      | 0.84     | 0.268167 | 200      | 249 | 234 | 318 | 235 | 227 | 260  | 236      | 228  | 255      | 0.89     | 0.306726 | 260      | 0.88     | 0.377746 |          |
| 256808_at   | A13g21430 | unknown protein                                                                           | 121 | 142 | 149 | 149 | 177 | 132 | 137 | 153      | 0.80     | 0.386408 | 98       | 82  | 137 | 130 | 108 | 92  | 103  | 98       | 96   | 106      | 1.00     | 0.365336 | 110      | 0.87     | 0.357445 |          |
| 256809_at   | A13g21440 | hypothetical protein predicted by oener myb family transcription factor                   | 54  | 66  | 69  | 67  | 72  | 60  | 66  | 66       | 0.90     | 0.329438 | 46       | 46  | 49  | 48  | 49  | 48  | 49   | 48       | 49   | 48       | 0.95     | 0.228223 | 49       | 0.86     | 0.446592 |          |
| 256810_at   | A13g21465 | adenyl cyclase, putative similar to adeny expressed protein                               | 75  | 96  | 104 | 133 | 134 | 124 | 92  | 130      | 0.70     | 0.013245 | 91       | 119 | 123 | 189 | 141 | 132 | 115  | 104      | 111  | 136      | 0.82     | 0.277092 | 154      | 0.72     | 0.105087 |          |
| 256811_at   | A13g21340 | serine/threonine-specific protein kinase leucine-rich repeat protein kinase, putati       | 16  | 17  | 15  | 15  | 20  | 14  | 16  | 16       | 0.97     | 0.801421 | 8        | 10  | 12  | 10  | 14  | 12  | 13   | 9        | 10   | 12       | 0.88     | 0.399362 | 12       | 0.84     | 0.279891 |          |
| 256812_at   | A13g21350 | hypothetical protein contains similarity i RNA codmase transcriptional regulati           | 170 | 248 | 259 | 273 | 323 | 248 | 226 | 281      | 0.80     | 0.193787 | 216      | 315 | 276 | 405 | 290 | 285 | 270  | 253      | 269  | 300      | 0.90     | 0.478027 | 326      | 0.82     | 0.303726 |          |
| 256813_at   | A13g21360 | unknown protein                                                                           | 201 | 297 | 303 | 293 | 316 | 274 | 284 | 314      | 0.93     | 0.007763 | 289      | 373 | 342 | 343 | 343 | 343 | 343  | 343      | 343  | 343      | 0.79     | 0.077043 | 364      | 0.79     | 0.026869 |          |
| 256814_at   | A13g21370 | beta-glucosidase, putative similar to b-glycosyl hydrolase family 1 protein               | 29  | 40  | 49  | 233 | 54  | 55  | 39  | 114      | 0.35     | 0.281226 | 20       | 27  | 26  | 31  | 23  | 24  | 39   | 31       | 24   | 30       | 0.83     | 0.262210 | 26       | 0.94     | 0.645455 |          |
| 256815_at   | A13g21380 | unknown protein contains Pfam profile: jalcylin lectin family protein                     | 38  | 39  | 56  | 257 | 71  | 76  | 44  | 135      | 0.33     |          |          |     |     |     |     |     |      |          |      |          |          |          |          |          |          |          |

|             |           |                                                                                            |     |     |     |     |     |     |     |      |          |          |     |     |     |     |     |     |     |       |          |      |          |          |      |          |          |
|-------------|-----------|--------------------------------------------------------------------------------------------|-----|-----|-----|-----|-----|-----|-----|------|----------|----------|-----|-----|-----|-----|-----|-----|-----|-------|----------|------|----------|----------|------|----------|----------|
| 256739_s_at | A13g29460 | hypothetical protein similar to putative r-copia-like retrotransposon family               | 9   | 11  | 12  | 12  | 14  | 14  | 11  | 14   | 0.79     | 0.094930 | 11  | 11  | 11  | 12  | 13  | 12  | 11  | 11    | 11       | 11   | 0.97     | 0.562262 | 12   | 0.92     | 0.046523 |
| 256740_at   | A13g29330 | hypothetical protein predicted by gene expressed protein                                   | 55  | 89  | 92  | 92  | 105 | 80  | 79  | 92   | 0.85     | 0.383105 | 73  | 77  | 85  | 106 | 89  | 84  | 91  | 78    | 78       | 90   | 0.87     | 0.140912 | 93   | 0.84     | 0.111977 |
| 256741_at   | A13g29375 | hypothetical protein predicted by gene X domain-containing protein                         | 116 | 145 | 163 | 160 | 166 | 146 | 141 | 157  | 0.90     | 0.353297 | 141 | 154 | 151 | 212 | 164 | 150 | 153 | 153   | 149      | 167  | 0.89     | 0.302849 | 176  | 0.85     | 0.234031 |
| 256742_s_at | A13g29380 | transcription initiation factor IIB, putative transactivator factor IIB (TFIIB) family pro | 42  | 49  | 45  | 46  | 5   | 47  | 46  | 48   | 0.94     | 0.349865 | 37  | 44  | 48  | 54  | 43  | 41  | 52  | 42    | 44       | 41   | 0.83     | 0.614274 | 43   | 1.00     | 0.015318 |
| 256743_s_at | A13g29370 | Expressed protein : supported by full-length expressed protein                             | 26  | 60  | 36  | 25  | 30  | 16  | 41  | 24   | 1.73     | 0.819213 | 44  | 56  | 34  | 25  | 23  | 22  | 31  | 36    | 45       | 28   | 1.63     | 0.027115 | 23   | 1.92     | 0.028799 |
| 256744_at   | A13g29350 | ATHP2, putative similar to ATPH2 GB: two-component phosphorelay mediator                   | 763 | 535 | 539 | 678 | 726 | 622 | 479 | 675  | 0.71     | 0.039789 | 309 | 356 | 371 | 710 | 514 | 505 | 438 | 474   | 345      | 528  | 0.65     | 0.030158 | 576  | 0.60     | 0.029286 |
| 256745_at   | A13g29360 | UDP-glucose dehydrogenase, putative UDP-glucose 6-dehydrogenase, putative                  | 315 | 614 | 714 | 843 | 972 | 813 | 691 | 876  | 0.78     | 0.029754 | 597 | 583 | 576 | 890 | 717 | 643 | 848 | 755   | 585      | 771  | 0.76     | 0.020860 | 750  | 0.78     | 0.088718 |
| 256746_at   | A13g29360 | UDP-glucose dehydrogenase, putative UDP-glucose 6-dehydrogenase, putative                  | 760 | 535 | 539 | 678 | 726 | 622 | 479 | 675  | 0.71     | 0.039789 | 309 | 356 | 371 | 710 | 514 | 505 | 438 | 474   | 345      | 528  | 0.65     | 0.030158 | 576  | 0.60     | 0.029286 |
| 256747_at   | A13g29180 | unknown protein similar to CW14 GB-B expressed protein                                     | 551 | 782 | 754 | 738 | 926 | 597 | 696 | 754  | 0.92     | 0.651581 | 773 | 681 | 671 | 915 | 876 | 756 | 930 | 921   | 709      | 880  | 0.81     | 0.013251 | 849  | 0.83     | 0.072565 |
| 256748_x_at | A13g30396 | En/Son transposon protein, putative S osseodense, hypothetical protein /// CAI             | 37  | 49  | 60  | 55  | 63  | 53  | 49  | 57   | 0.85     | 0.315555 | 45  | 41  | 47  | 37  | 40  | 37  | 50  | 47    | 45       | 40   | 1.11     | 0.268836 | 38   | 1.17     | 0.027782 |
| 256749_at   | A13g30400 | hypothetical protein similar to putative r-covs-like retrotransposon family (Atheta        | 26  | 37  | 38  | 38  | 40  | 39  | 34  | 39   | 0.87     | 0.275914 | 23  | 32  | 33  | 25  | 25  | 27  | 35  | 32    | 29       | 29   | 1.02     | 0.891821 | 25   | 1.15     | 0.316009 |
| 256750_at   | A13g27150 | unknown protein contains Pfam profile: kelch repeat-containing F-box family pro            | 25  | 42  | 38  | 67  | 50  | 55  | 45  | 57   | 0.78     | 0.166988 | 44  | 44  | 48  | 66  | 54  | 63  | 57  | 49    | 59       | 59   | 0.83     | 0.032188 | 59   | 0.83     | 0.106362 |
| 256751_at   | A13g27170 | CLC-b chloride channel protein identic chloride channel protein (CLC-b)                    | 17  | 21  | 23  | 26  | 18  | 20  | 23  | 0.87 | 0.210519 | 15       | 16  | 16  | 16  | 17  | 17  | 16  | 16  | 16    | 16       | 0.95 | 0.210194 | 17       | 0.93 | 0.121203 |          |
| 256752_at   | A13g27180 | hypothetical protein predicted by gene expressed protein                                   | 75  | 110 | 101 | 94  | 105 | 92  | 95  | 97   | 0.98     | 0.880319 | 86  | 93  | 93  | 91  | 87  | 89  | 84  | 94    | 91       | 89   | 1.02     | 0.530617 | 89   | 1.02     | 0.530058 |
| 256753_at   | A13g27160 | unknown protein contains Pfam profile: ribosomal protein S21 family protein                | 50  | 85  | 91  | 86  | 99  | 65  | 76  | 83   | 0.91     | 0.657813 | 87  | 128 | 87  | 144 | 91  | 92  | 94  | 85    | 101      | 101  | 1.00     | 0.988281 | 109  | 0.93     | 0.740425 |
| 256754_at   | A13g26980 | unknown protein                                                                            | 133 | 196 | 210 | 184 | 266 | 159 | 179 | 203  | 0.88     | 0.588831 | 150 | 148 | 157 | 206 | 185 | 179 | 211 | 214   | 152      | 199  | 0.76     | 0.027674 | 190  | 0.80     | 0.011220 |
| 256755_at   | A13g26960 | calmodulin, putative similar to GB-P07: calmodulin, putative                               | 108 | 122 | 132 | 138 | 103 | 177 | 124 | 0.86 | 0.288994 | 95       | 104 | 89  | 116 | 91  | 105 | 116 | 126 | 92    | 111      | 0.83 | 0.085495 | 104      | 0.89 | 0.278103 |          |
| 256756_at   | A13g26610 | ATPase 1c, putative similar to GB-AAD: haloacid dehalogenase-like hydrolase f              | 25  | 29  | 31  | 37  | 33  | 33  | 29  | 34   | 0.84     | 0.065184 | 27  | 26  | 30  | 24  | 20  | 25  | 30  | 23    | 28       | 24   | 1.14     | 0.182362 | 23   | 1.20     | 0.062635 |
| 256757_at   | A13g26620 | membrane transporter, putative similar ABC transporter family protein                      | 16  | 23  | 39  | 30  | 28  | 26  | 26  | 29   | 0.91     | 0.733701 | 21  | 16  | 24  | 28  | 19  | 21  | 27  | 23    | 20       | 23   | 0.86     | 0.301845 | 22   | 0.90     | 0.573592 |
| 256758_at   | A13g26630 | hypothetical protein similar to Atheta ret gypsy-like retrotransposon family (Atheta       | 16  | 22  | 31  | 24  | 26  | 26  | 25  | 1.03 | 0.784093 | 27       | 26  | 37  | 31  | 28  | 26  | 34  | 27  | 30    | 29       | 1.02 | 0.857719 | 28       | 1.04 | 0.756530 |          |
| 256759_at   | A13g26640 | hypothetical protein predicted by gene expressed protein                                   | 27  | 33  | 46  | 41  | 45  | 47  | 35  | 44   | 0.80     | 0.220519 | 21  | 26  | 31  | 29  | 19  | 21  | 30  | 27    | 26       | 25   | 1.04     | 0.777436 | 23   | 1.15     | 0.454585 |
| 256760_at   | A13g26650 | SKP1/ASK1 (A115), putative similar to: Skp1 family protein                                 | 21  | 26  | 27  | 29  | 27  | 29  | 25  | 28   | 0.87     | 0.117485 | 23  | 24  | 26  | 25  | 19  | 22  | 23  | 22    | 24       | 22   | 1.10     | 0.153168 | 22   | 1.11     | 0.244912 |
| 256761_at   | A13g26670 | hypothetical protein predicted by gene expressed protein                                   | 190 | 231 | 275 | 323 | 374 | 265 | 232 | 321  | 0.72     | 0.090604 | 106 | 119 | 117 | 208 | 150 | 146 | 159 | 166   | 114      | 166  | 0.69     | 0.013399 | 168  | 0.68     | 0.056050 |
| 256762_at   | A13g26655 | Expressed protein : supported by full-length expressed protein                             | 30  | 42  | 43  | 39  | 47  | 44  | 38  | 43   | 0.88     | 0.381473 | 30  | 24  | 28  | 34  | 24  | 36  | 33  | 26    | 27       | 31   | 0.90     | 0.389099 | 31   | 0.87     | 0.387299 |
| 256762_s_at | A13g26660 | glutamy-RNA amidotransferase subu glutamy-RNA(Gln) amidotransferase, p                     | 449 | 438 | 461 | 504 | 371 | 406 | 445 | 501  | 0.505939 | 356      | 297 | 385 | 433 | 391 | 354 | 447 | 428 | 346   | 411      | 84   | 0.069802 | 393      | 0.88 | 0.245730 |          |
| 256762_s_at | A13g26680 | hypothetical protein predicted by gene expressed protein                                   | 68  | 95  | 101 | 113 | 121 | 93  | 88  | 109  | 0.81     | 0.183184 | 59  | 65  | 65  | 95  | 74  | 79  | 75  | 63    | 80       | 79   | 0.79     | 0.168184 | 82   | 0.77     | 0.043170 |
| 256763_at   | A13g30260 | floral homeotic protein AGL8, putative MAD5-box protein (AGL79)                            | 19  | 19  | 33  | 30  | 26  | 24  | 29  | 0.83 | 0.360265 | 18       | 19  | 26  | 19  | 18  | 17  | 27  | 21  | 21    | 20       | 1.04 | 0.809301 | 18       | 1.16 | 0.319510 |          |
| 256763_s_at | A13g30340 | hypothetical protein contains Pfam prof nodulin MN21 family protein                        | 35  | 39  | 41  | 47  | 45  | 44  | 38  | 45   | 0.84     | 0.021595 | 24  | 27  | 29  | 34  | 29  | 29  | 36  | 23    | 27       | 30   | 0.89     | 0.377744 | 31   | 0.88     | 0.179798 |
| 256763_s_at | A13g30360 | hypothetical protein predicted by gene hypothetical protein                                | 16  | 20  | 31  | 27  | 32  | 35  | 23  | 31   | 0.73     | 0.130659 | 12  | 25  | 23  | 21  | 16  | 16  | 23  | 16    | 20       | 18   | 1.15     | 0.516763 | 17   | 1.21     | 0.480116 |
| 256763_s_at | A13g30370 | hypothetical protein predicted by gene hypothetical protein                                | 15  | 17  | 16  | 17  | 16  | 17  | 11  | 13   | 0.543230 | 13       | 17  | 16  | 15  | 16  | 15  | 17  | 16  | 15    | 17       | 16   | 1.03     | 0.717171 | 15   | 1.02     | 0.809397 |
| 256762_s_at | A13g30380 | unknown protein contains Pfam profile: expressed protein                                   | 68  | 78  | 94  | 86  | 86  | 69  | 80  | 80   | 0.99     | 0.948303 | 63  | 58  | 68  | 86  | 66  | 65  | 67  | 72    | 63       | 71   | 0.89     | 0.201030 | 72   | 0.87     | 0.287742 |
| 256763_s_at | A13g30270 | MADS-box transcription factor similar t MAD5-box protein (AGL79)                           | 24  | 13  | 25  | 27  | 25  | 32  | 21  | 28   | 0.73     | 0.151945 | 15  | 15  | 20  | 24  | 13  | 15  | 23  | 19    | 17       | 19   | 0.89     | 0.499730 | 18   | 0.95     | 0.823102 |
| 256764_at   | A13g30280 | deacetylVindoline 4-O-acetyltransferase transferase family protein                         | 41  | 45  | 63  | 57  | 54  | 55  | 50  | 55   | 0.90     | 0.453836 | 37  | 35  | 38  | 41  | 33  | 43  | 45  | 35    | 37       | 39   | 0.93     | 0.427233 | 39   | 0.94     | 0.527216 |
| 256765_at   | A13g30290 | cytochrome P450, putative similar to G cytochrome P450 family protein                      | 18  | 21  | 20  | 33  | 22  | 18  | 21  | 0.87 | 0.156400 | 13       | 17  | 25  | 19  | 16  | 15  | 17  | 17  | 15    | 14       | 18   | 1.17     | 0.371732 | 19   | 1.02     | 0.674988 |
| 256766_at   | A13g30300 | auxin-independent growth promoter, c expressed protein                                     | 413 | 483 | 579 | 601 | 684 | 531 | 492 | 605  | 0.81     | 0.156616 | 312 | 291 | 356 | 503 | 422 | 365 | 433 | 396   | 320      | 424  | 0.75     | 0.021411 | 430  | 0.74     | 0.067877 |
| 256767_at   | A13g30310 | hypothetical protein predicted by gene hypothetical protein                                | 11  | 15  | 15  | 14  | 14  | 18  | 15  | 16   | 0.98     | 0.937273 | 16  | 24  | 23  | 16  | 14  | 14  | 19  | 16    | 21       | 16   | 1.32     | 0.050071 | 15   | 1.42     | 0.062585 |
| 256768_at   | A13g30320 | hypothetical protein predicted by gene hypothetical protein                                | 13  | 11  | 16  | 17  | 18  | 13  | 14  | 16   | 0.84     | 0.302653 | 9   | 10  | 15  | 12  | 13  | 10  | 13  | 10    | 12       | 12   | 1.00     | 0.994337 | 12   | 1.00     | 0.980091 |
| 256769_at   | A13g30330 | hypothetical protein predicted by gene CACTA-like transposase family (Pta/En               | 11  | 13  | 16  | 13  | 16  | 14  | 17  | 0.78 | 0.218147 | 4        | 6   | 11  | 10  | 15  | 12  | 9   | 11  | 13    | 10       | 12   | 1.13     | 0.262017 | 9    | 1.21     | 0.453265 |
| 256767_s_at | A13g30350 | hypothetical protein predicted by gene expressed protein                                   | 26  | 35  | 38  | 32  | 43  | 32  | 33  | 36   | 0.94     | 0.679266 | 23  | 25  | 25  | 19  | 22  | 27  | 25  | 27    | 24       | 24   | 1.01     | 0.931977 | 23   | 1.05     | 0.646055 |
| 256767_s_at | A13g30390 | unknown protein contains Pfam profile: amino acid transporter family protein               | 325 | 526 | 572 | 588 | 657 | 479 | 474 | 575  | 0.82     | 0.334779 | 394 | 418 | 399 | 570 | 454 | 410 | 499 | 483   | 404      | 483  | 0.84     | 0.067022 | 478  | 0.84     | 0.197348 |
| 256767_s_at | A13g40020 | unknown protein similar to T14G11.15 calcium-binding EF hand family protein                | 16  | 17  | 19  | 19  | 21  | 14  | 17  | 15   | 0.94     | 0.685722 | 17  | 15  | 17  | 12  | 12  | 20  | 16  | 14    | 14       | 1.12 | 0.470057 | 15       | 1.09 | 0.655205 |          |
| 256767_s_at | A13g40080 | putative peroxidase                                                                        | 43  | 49  | 57  | 46  | 54  | 48  | 50  | 49   | 1.01     | 0.832500 | 44  | 48  | 40  | 45  | 44  | 36  | 40  | 44    | 44       | 41   | 1.07     | 0.327176 | 40   | 1.10     | 0.425488 |
| 256767_s_at | A13g40080 | cysteine proteinase contains similarity t cysteine proteinase, putative                    | 21  | 23  | 32  | 38  | 33  | 30  | 23  | 33   | 0.77     | 0.210198 | 33  | 27  | 23  | 21  | 23  | 21  | 23  | 22    | 21       | 23   | 0.92     | 0.270536 | 22   | 0.94     | 0.478778 |
| 256767_s_at | A13g40090 | hypothetical protein predicted by gene expressed protein                                   | 97  | 118 | 118 | 141 | 155 | 119 | 111 | 138  | 0.80     | 0.096863 | 121 | 101 | 115 | 145 | 137 | 122 | 137 | 141   | 112      | 136  | 0.82     | 0.011053 | 135  | 0.83     | 0.064785 |
| 256767_s_at | A13g4100  | hypothetical protein predicted by gene expressed protein                                   | 17  | 18  | 20  | 18  | 18  | 17  | 18  | 17   | 1.04     | 0.487767 | 12  | 13  | 11  | 14  | 15  | 14  | 16  | 12    | 12       | 14   | 0.86     | 0.076955 | 14   | 0.86     | 0.077369 |
| 256767_s_at | A13g4110  | hypothetical protein predicted by gene hypothetical protein                                | 39  | 39  | 60  | 48  | 51  | 53  | 46  | 51   | 0.91     | 0.567978 | 29  | 24  | 30  | 33  | 25  | 36  | 32  | 27    | 30       | 0.91 | 0.366286 | 28       | 0.98 | 0.836808 |          |
| 256767_s_at | A13g4120  | hypothetical protein predicted by gene hypothetical protein                                | 4   | 4   | 5   | 2   | 5   | 2   | 3   | 1.05 | 0.845120 | 4        | 3   | 1   | 5   | 1   | 2   | 3   | 4   | 1     | 5        | 1.53 | 0.154650 | 3        | 1.61 | 0.260440 |          |
| 256767_s_at | A13g4130  | En/Son-like transposon protein related CACTA-like transposase family (Pta/En               | 105 | 113 | 132 | 12  | 12  | 10  | 117 | 11   | 10.28    | 0.000181 | 112 | 108 | 122 | 9   | 11  | 12  | 10  | 11.81 | 0.000000 | 10   | 11.81    | 0.000000 | 10   | 10.93    | 0.000020 |
| 256767_s_at | A13g4140  | putative DOF zinc finger protein                                                           | 88  | 97  | 86  | 114 | 156 | 114 | 90  | 128  | 0.77     | 0.061549 | 98  | 112 | 106 | 169 | 138 | 135 | 119 | 123   | 105      | 137  | 0.77     | 0.041066 | 147  | 0.71     | 0.021204 |
|             |           |                                                                                            |     |     |     |     |     |     |     |      |          |          |     |     |     |     |     |     |     |       |          |      |          |          |      |          |          |

|           |           |                                                                                              |     |      |      |      |      |      |      |      |          |          |      |      |      |      |      |      |      |      |      |      |          |          |      |          |          |
|-----------|-----------|----------------------------------------------------------------------------------------------|-----|------|------|------|------|------|------|------|----------|----------|------|------|------|------|------|------|------|------|------|------|----------|----------|------|----------|----------|
| 256644_at | A13g32300 | unknown protein similar to hypothetical pseudogene, hypothetical protein // pse              | 18  | 20   | 29   | 25   | 31   | 31   | 22   | 29   | 0.77     | 0.148319 | 21   | 16   | 25   | 22   | 18   | 33   | 36   | 20   | 27   | 0.77 | 0.246790 | 22       | 0.95 | 0.744800 |          |
| 256645_at | A13g24250 | hypothetical protein predicted by gener glycolytic protein                                   | 162 | 181  | 225  | 250  | 265  | 237  | 190  | 251  | 0.76     | 0.039064 | 104  | 98   | 142  | 147  | 134  | 127  | 222  | 197  | 115  | 165  | 0.69     | 0.107365 | 138  | 0.84     | 0.228530 |
| 256646_at | A13g13590 | hypothetical protein predicted by geneer DC1 domain-containing protein                       | 82  | 80   | 93   | 100  | 128  | 99   | 78   | 109  | 0.72     | 0.075782 | 66   | 63   | 60   | 82   | 68   | 66   | 84   | 77   | 63   | 75   | 0.83     | 0.049230 | 72   | 0.87     | 0.166515 |
| 256647_at | A13g13880 | unknown protein contains similarity to c-oxidase, 2OG-FerH oxoanase I                        | 27  | 35   | 48   | 34   | 4    | 40   | 36   | 39   | 0.95     | 0.037810 | 37   | 32   | 39   | 34   | 30   | 27   | 34   | 30   | 27   | 34   | 1.13     | 0.217280 | 40   | 2.0      | 0.060430 |
| 256648_at | A13g13570 | ribosomal protein, putative similar to 60S ribosomal protein L7 (RPL7D)                      | 850 | 1081 | 1154 | 1139 | 1224 | 1000 | 1028 | 1121 | 0.92     | 0.456294 | 1007 | 1108 | 1084 | 1441 | 1135 | 1067 | 1198 | 1136 | 1067 | 1195 | 0.89     | 0.198687 | 1214 | 0.88     | 0.282056 |
| 256649_at | A13g13570 | serine/arginine-rich protein, putative si-AC3-5-like splicing factor, 30a kD (SCL3)          | 471 | 553  | 598  | 596  | 674  | 585  | 541  | 618  | 0.87     | 0.172842 | 505  | 689  | 629  | 921  | 645  | 613  | 719  | 705  | 607  | 721  | 0.84     | 0.215702 | 726  | 0.84     | 0.347084 |
| 256650_at | A13g13620 | hypothetical protein contains similarity i- amino acid permease family protein               | 122 | 232  | 274  | 239  | 329  | 249  | 233  | 272  | 0.85     | 0.341608 | 130  | 157  | 147  | 168  | 155  | 150  | 217  | 153  | 145  | 169  | 0.86     | 0.225044 | 128  | 0.92     | 0.244718 |
| 256651_at | A13g18400 | hypothetical protein predicted by geneer acetylcholinesterase (PFR) repeat-containi          | 61  | 76   | 78   | 75   | 63   | 72   | 72   | 1.00 | 0.037227 | 66       | 52   | 64   | 65   | 60   | 49   | 62   | 64   | 65   | 62   | 69   | 1.00     | 0.434734 | 67   | 1.14     | 0.060430 |
| 256652_at | A13g18850 | hypothetical protein similar to putative c- phospholipid/dicardiol acyltransferase fa        | 167 | 255  | 178  | 322  | 321  | 263  | 200  | 302  | 0.66     | 0.039493 | 168  | 199  | 190  | 320  | 227  | 211  | 238  | 225  | 186  | 244  | 0.76     | 0.073416 | 253  | 0.74     | 0.132973 |
| 256653_at | A13g18870 | hypothetical protein predicted by geneer mitochondrial transcription termination fa          | 44  | 60   | 54   | 55   | 59   | 53   | 53   | 56   | 0.94     | 0.584529 | 58   | 70   | 73   | 62   | 56   | 60   | 77   | 62   | 67   | 64   | 1.05     | 0.572810 | 60   | 1.13     | 0.279600 |
| 256654_at | A13g18880 | ribosomal protein, putative similar to 4i ribosomal protein S17 family protein               | 89  | 88   | 98   | 96   | 119  | 88   | 92   | 101  | 0.91     | 0.397044 | 58   | 50   | 57   | 59   | 55   | 53   | 72   | 58   | 55   | 60   | 0.93     | 0.412282 | 56   | 0.99     | 0.884283 |
| 256655_at | A13g18880 | hypothetical protein predicted by geneer expressed protein                                   | 77  | 105  | 87   | 126  | 130  | 86   | 89   | 117  | 0.76     | 0.108798 | 105  | 92   | 99   | 143  | 120  | 115  | 113  | 99   | 120  | 115  | 0.82     | 0.045098 | 124  | 0.79     | 0.071423 |
| 256656_at | A13g18900 | hypothetical protein similar to hypothet expressed protein                                   | 46  | 53   | 74   | 68   | 69   | 56   | 59   | 64   | 0.91     | 0.652844 | 34   | 29   | 40   | 48   | 41   | 35   | 50   | 42   | 34   | 42   | 0.83     | 0.193783 | 39   | 0.89     | 0.487244 |
| 256657_at | A13g18860 | unknown protein contains similarity to c- transducin family protein / WD-40 repeat           | 423 | 493  | 525  | 546  | 597  | 464  | 480  | 535  | 0.90     | 0.324970 | 370  | 323  | 404  | 478  | 424  | 351  | 472  | 434  | 366  | 432  | 0.85     | 0.108090 | 447  | 0.88     | 0.302885 |
| 256658_at | A13g12010 | unknown protein                                                                              | 253 | 315  | 277  | 363  | 395  | 291  | 282  | 350  | 0.81     | 0.129623 | 256  | 219  | 268  | 364  | 325  | 259  | 286  | 289  | 248  | 305  | 0.81     | 0.074691 | 316  | 0.78     | 0.113469 |
| 256659_at | A13g12020 | unknown protein similar to putative kinase motor protein-related                             | 88  | 98   | 80   | 92   | 97   | 77   | 82   | 89   | 0.92     | 0.543279 | 53   | 51   | 60   | 67   | 68   | 48   | 57   | 55   | 54   | 59   | 0.92     | 0.437877 | 61   | 0.89     | 0.414377 |
| 256660_at | A13g12060 | hypothetical protein similar to hvothet expressed protein                                    | 51  | 71   | 65   | 120  | 155  | 108  | 62   | 128  | 0.40     | 0.012844 | 38   | 41   | 46   | 58   | 51   | 48   | 61   | 46   | 41   | 53   | 0.78     | 0.040910 | 52   | 0.78     | 0.056669 |
| 256661_at | A13g11964 | hypothetical protein similar to putative c- si RNA-binding domain-containing prot            | 309 | 370  | 374  | 407  | 429  | 361  | 351  | 399  | 0.88     | 0.176967 | 275  | 238  | 337  | 376  | 317  | 250  | 315  | 288  | 283  | 309  | 0.92     | 0.481038 | 315  | 0.90     | 0.535857 |
| 256662_at | A13g11980 | male sterility protein 2 (MS2) nearly ide male sterility protein 2 (MS2)                     | 14  | 16   | 23   | 23   | 25   | 20   | 18   | 22   | 0.79     | 0.200190 | 12   | 13   | 17   | 14   | 11   | 16   | 17   | 15   | 14   | 14   | 0.98     | 0.870167 | 14   | 1.04     | 0.788547 |
| 256663_at | A13g12050 | unknown protein - supported by full-len Ahal domain-containing protein                       | 993 | 1300 | 1211 | 1484 | 1812 | 1330 | 1168 | 1542 | 0.72     | 0.091099 | 1124 | 1119 | 1267 | 1640 | 1309 | 1149 | 1354 | 1358 | 1170 | 1362 | 0.86     | 0.135208 | 1366 | 0.86     | 0.267840 |
| 256664_at | A13g12040 | DNA-3-methyladenine glycosylase (MA) DNA-3-methyladenine glycosylase (MA)                    | 136 | 130  | 167  | 141  | 152  | 135  | 134  | 143  | 0.94     | 0.673904 | 99   | 112  | 121  | 126  | 89   | 116  | 105  | 103  | 111  | 108  | 1.03     | 0.748018 | 110  | 1.01     | 0.961101 |
| 256665_at | A13g12000 | S-locus related protein SLR1 homolog - S-locus related protein SLR1, putative f              | 17  | 123  | 17   | 29   | 43   | 29   | 53   | 33   | 1.57     | 0.621708 | 11   | 13   | 14   | 21   | 13   | 15   | 10   | 12   | 13   | 14   | 0.90     | 0.603052 | 16   | 0.78     | 0.254958 |
| 256637_at | A13g12030 | hypothetical protein similar to membrane c-expressed protein                                 | 167 | 213  | 214  | 210  | 218  | 191  | 198  | 206  | 0.96     | 0.660755 | 204  | 226  | 227  | 276  | 197  | 199  | 228  | 201  | 219  | 220  | 0.99     | 0.946404 | 224  | 0.98     | 0.852888 |
| 256638_at | A13g10900 | RNA-binding protein, putative similar to RNA-binding protein, putative                       | 39  | 40   | 55   | 57   | 58   | 52   | 45   | 56   | 0.80     | 0.103706 | 32   | 31   | 40   | 37   | 32   | 32   | 39   | 35   | 35   | 35   | 0.98     | 0.838468 | 34   | 1.02     | 0.860847 |
| 256639_at | A13g03840 | hypothetical protein predicted by geneer hypothetical protein                                | 14  | 14   | 7    | 13   | 19   | 17   | 10   | 16   | 0.64     | 0.075665 | 11   | 11   | 12   | 13   | 8    | 6    | 10   | 9    | 11   | 9    | 1.23     | 0.239180 | 9    | 1.21     | 0.400325 |
| 256640_at | A13g03843 | hypothetical protein predicted by geneer copia-like retrotransposon family // hvpc           | 34  | 47   | 60   | 53   | 52   | 58   | 47   | 54   | 0.87     | 0.404865 | 35   | 49   | 37   | 42   | 35   | 39   | 66   | 50   | 41   | 46   | 0.87     | 0.493893 | 39   | 1.05     | 0.714089 |
| 256610_at | A13g03845 | hypothetical protein predicted by geneer hypothetical protein                                | 8   | 8    | 16   | 7    | 10   | 14   | 11   | 10   | 1.04     | 0.911209 | 4    | 10   | 6    | 6    | 8    | 7    | 11   | 8    | 7    | 8    | 0.84     | 0.498359 | 7    | 0.97     | 0.901646 |
| 256611_at | A13g29270 | unknown protein similar to putative RIN expressed protein                                    | 180 | 249  | 258  | 291  | 330  | 254  | 229  | 292  | 0.78     | 0.129634 | 248  | 280  | 286  | 423  | 327  | 297  | 284  | 276  | 272  | 322  | 0.84     | 0.222346 | 349  | 0.78     | 0.123469 |
| 256612_at | A13g28280 | hypothetical protein predicted by geneer expressed protein                                   | 433 | 546  | 560  | 528  | 603  | 504  | 513  | 545  | 0.94     | 0.561854 | 504  | 439  | 579  | 737  | 574  | 535  | 537  | 501  | 507  | 577  | 0.88     | 0.312855 | 615  | 0.82     | 0.217504 |
| 256613_at | A13g28270 | hypothetical protein predicted by geneer centactin-like (PFR) repeat-containi                | 72  | 103  | 104  | 104  | 104  | 93   | 101  | 0.93 | 0.53845  | 81       | 85   | 89   | 109  | 87   | 102  | 85   | 101  | 102  | 108  | 108  | 0.86     | 0.017608 | 88   | 0.89     | 0.290469 |
| 256614_at | A13g29300 | hypothetical protein predicted by geneer hypothetical protein                                | 23  | 26   | 24   | 27   | 34   | 24   | 25   | 28   | 0.87     | 0.258660 | 14   | 16   | 13   | 21   | 18   | 13   | 21   | 18   | 14   | 19   | 0.74     | 0.010003 | 19   | 0.76     | 0.030099 |
| 256615_at | A13g22250 | hypothetical protein predicted by geneer UDP-glucuronosyl(UDP-glucosyl) transfe              | 31  | 34   | 43   | 35   | 42   | 36   | 33   | 38   | 0.87     | 0.489404 | 20   | 26   | 29   | 26   | 23   | 21   | 28   | 24   | 25   | 24   | 1.02     | 0.877895 | 23   | 1.06     | 0.679224 |
| 256616_at | A13g22260 | hypothetical protein similar to unknown OTU-like cysteine protease family si                 | 51  | 59   | 71   | 71   | 76   | 60   | 60   | 69   | 0.87     | 0.301638 | 62   | 64   | 68   | 62   | 82   | 72   | 70   | 65   | 64   | 76   | 0.85     | 0.126354 | 82   | 0.79     | 0.045747 |
| 256617_at | A13g22240 | unknown protein - supported by full-len expressed protein                                    | 122 | 227  | 372  | 907  | 725  | 485  | 240  | 704  | 0.34     | 0.030763 | 1008 | 962  | 967  | 1508 | 1349 | 1282 | 1257 | 1198 | 888  | 1319 | 0.75     | 0.033677 | 1379 | 0.72     | 0.004459 |
| 256618_at | A13g24440 | hypothetical protein - fibronectin type III domain-containing on                             | 44  | 180  | 162  | 206  | 212  | 173  | 163  | 197  | 0.83     | 0.091167 | 164  | 134  | 171  | 235  | 197  | 153  | 221  | 207  | 156  | 203  | 0.77     | 0.064495 | 195  | 0.80     | 0.216659 |
| 256619_at | A13g24470 | hypothetical protein predicted by geneer TMS membrane family protein / tumou                 | 147 | 50   | 59   | 69   | 64   | 61   | 55   | 67   | 0.95     | 0.035565 | 30   | 30   | 34   | 29   | 33   | 38   | 35   | 34   | 31   | 34   | 0.93     | 0.311607 | 33   | 0.94     | 0.539002 |
| 256620_at | A13g24480 | disease resistance protein, putative sir leucine-rich repeat family protein / exten          | 128 | 130  | 134  | 163  | 157  | 132  | 131  | 151  | 0.87     | 0.107526 | 220  | 151  | 228  | 286  | 266  | 202  | 183  | 186  | 199  | 225  | 0.89     | 0.489072 | 252  | 0.79     | 0.212063 |
| 256621_at | A13g24450 | unknown protein - supported by full-len copper-binding family protein                        | 185 | 271  | 305  | 368  | 453  | 338  | 253  | 384  | 0.66     | 0.061372 | 310  | 318  | 282  | 462  | 390  | 370  | 349  | 303  | 362  | 377  | 0.61     | 0.050969 | 414  | 0.73     | 0.014069 |
| 256622_at | A13g28920 | unknown protein - supported by full-len expressed protein                                    | 301 | 297  | 310  | 330  | 382  | 305  | 303  | 339  | 0.89     | 0.186000 | 216  | 211  | 249  | 411  | 292  | 264  | 315  | 305  | 226  | 317  | 0.71     | 0.037625 | 322  | 0.70     | 0.106458 |
| 256623_at | A13g19960 | myosin identical to myosin GB.CAB618 myosin (ATM)                                            | 173 | 249  | 237  | 244  | 287  | 207  | 220  | 246  | 0.89     | 0.473497 | 141  | 125  | 155  | 159  | 161  | 122  | 185  | 151  | 141  | 166  | 0.90     | 0.356473 | 147  | 0.95     | 0.686728 |
| 256624_at | A13g19990 | hypothetical protein predicted by geneer expressed protein                                   | 184 | 249  | 284  | 339  | 342  | 288  | 239  | 323  | 0.74     | 0.070580 | 224  | 245  | 241  | 382  | 288  | 261  | 301  | 282  | 237  | 303  | 0.78     | 0.057305 | 310  | 0.76     | 0.118827 |
| 256625_at | A13g20010 | urodelectin tromolefin-binding protein, putative OTU-like domain-containing protein / helica | 260 | 267  | 374  | 398  | 327  | 322  | 386  | 358  | 0.83     | 0.010359 | 267  | 236  | 255  | 356  | 299  | 292  | 299  | 304  | 299  | 304  | 0.80     | 0.080683 | 299  | 0.85     | 0.202505 |
| 256626_at | A13g20015 | hypothetical protein, 5 partial                                                              | 116 | 132  | 142  | 184  | 184  | 136  | 210  | 0.65 | 0.020236 | 88       | 88   | 141  | 132  | 130  | 132  | 130  | 132  | 130  | 132  | 130  | 0.65     | 0.001930 | 142  | 0.64     | 0.015579 |
| 256627_at | A13g19970 | hypothetical protein - supported by cDNA: EXPRESSED PROTEIN                                  | 112 | 107  | 143  | 130  | 142  | 113  | 120  | 129  | 0.94     | 0.590904 | 94   | 81   | 91   | 105  | 88   | 98   | 109  | 115  | 103  | 88   | 0.90     | 0.325960 | 91   | 0.97     | 0.799615 |
| 256628_at | A13g20000 | membrane imort protein, putative sim porin family protein                                    | 700 | 877  | 1007 | 1035 | 1062 | 946  | 861  | 1015 | 0.85     | 0.183669 | 973  | 987  | 1027 | 1413 | 1095 | 1066 | 1093 | 1032 | 996  | 1140 | 0.87     | 0.172824 | 1191 | 0.84     | 0.156568 |
| 256629_at | A13g19980 | serine/threonine protein chosphatase, serine/threonine protein chosphatase, o                | 778 | 517  | 526  | 611  | 678  | 554  | 474  | 614  | 0.77     | 0.079599 | 530  | 580  | 578  | 994  | 638  | 655  | 650  | 605  | 563  | 700  | 0.80     | 0.160994 | 749  | 0.75     | 0.147826 |
| 256630_at | A13g28320 | hypothetical protein                                                                         | 35  | 37   | 23   | 26   | 23   | 33   | 24   | 33   | 1.58     | 0.038238 | 32   | 38   | 37   | 14   | 11   | 18   | 16   | 36   | 15   | 14   | 1.03     | 0.002046 | 13   | 0.71     | 0.004049 |
| 256631_at | A13g28320 | AT14a-like protein similar to AT14a rote hypothetical protein                                | 54  | 63   | 77   | 78   | 80   | 72   | 65   | 77   | 0.85     | 0.176374 |      |      |      |      |      |      |      |      |      |      |          |          |      |          |          |

|             |           |                                                                                      |     |     |     |      |      |      |     |      |          |          |     |     |     |     |     |     |     |     |     |      |          |          |      |          |          |
|-------------|-----------|--------------------------------------------------------------------------------------|-----|-----|-----|------|------|------|-----|------|----------|----------|-----|-----|-----|-----|-----|-----|-----|-----|-----|------|----------|----------|------|----------|----------|
| 256556_at   | A13g31403 | mutator-like transposase, putative simi Mutator-like transposase family              | 7   | 3   | 8   | 5    | 6    | 8    | 6   | 6    | 0.94     | 0.859302 | 7   | 5   | 6   | 6   | 5   | 5   | 6   | 8   | 6   | 1.00 | 0.977396 | 5        | 1.14 | 0.333514 |          |
| 256557_at   | A13g31410 | hyothetical protein similar to hyotheti hyothetical protein                          | 4   | 2   | 4   | 6    | 5    | 7    | 3   | 6    | 0.56     | 0.050145 | 7   | 6   | 5   | 3   | 11  | 6   | 4   | 4   | 6   | 0.98 | 0.961782 | 7        | 0.82 | 0.623899 |          |
| 256558_at   | A13g31300 | hyothetical protein predicted by oener hyothetical protein                           | 7   | 11  | 7   | 14   | 14   | 10   | 8   | 13   | 0.83     | 0.058292 | 9   | 11  | 11  | 9   | 10  | 11  | 9   | 10  | 9   | 1.10 | 0.145471 | 9        | 1.13 | 0.107386 |          |
| 256559_at   | A13g31300 | Athlia CRF 1, putative similar to Athlia crva-like retrotransposon family (Athlia    | 11  | 11  | 14  | 13   | 11   | 7    | 10  | 11   | 0.95     | 0.861714 | 4   | 7   | 8   | 5   | 7   | 1   | 9   | 7   | 1   | 1.01 | 0.961242 | 7        | 1.04 | 0.822031 |          |
| 256560_s_at | A13g31415 | velisidiaridene synthase, putative, 5' de terpene synthase/cyclase family protein    | 19  | 10  | 20  | 18   | 20   | 20   | 16  | 19   | 0.84     | 0.411447 | 15  | 17  | 15  | 12  | 13  | 11  | 16  | 12  | 16  | 1.13 | 0.095367 | 12       | 1.28 | 0.018742 |          |
| 256561_s_at | A13g31330 | hyothetical protein similar to putative r pseudogene, hyothetical protein            | 9   | 8   | 9   | 8    | 12   | 10   | 9   | 10   | 0.87     | 0.282631 | 9   | 8   | 10  | 7   | 5   | 6   | 11  | 8   | 9   | 8    | 1.18     | 0.377254 | 6    | 1.45     | 0.035171 |
| 256562_at   | A13g29775 | Ty1/Copia-type retroelement polyporei copia-like retrotransposon family              | 20  | 20  | 26  | 22   | 24   | 26   | 22  | 24   | 0.91     | 0.400928 | 21  | 24  | 25  | 20  | 16  | 22  | 22  | 24  | 20  | 1.16 | 0.111822 | 19       | 1.23 | 0.092728 |          |
| 256563_at   | A13g29780 | hyothetical protein, supported by full-expressed protein                             | 20  | 20  | 28  | 26   | 28   | 20   | 23  | 26   | 0.88     | 0.460363 | 20  | 28  | 17  | 15  | 16  | 14  | 17  | 13  | 16  | 1.06 | 0.701590 | 14       | 0.98 | 0.190922 |          |
| 256564_at   | A13g29770 | aloha/beta hydrolase, putative contains hydrolase, alpha/beta fold family protein    | 31  | 41  | 42  | 47   | 51   | 51   | 38  | 50   | 0.77     | 0.045370 | 32  | 35  | 40  | 51  | 43  | 43  | 52  | 45  | 36  | 0.77 | 0.013332 | 46       | 0.79 | 0.050884 |          |
| 256565_at   | A13g19516 | hyothetical protein                                                                  | 18  | 22  | 24  | 20   | 25   | 26   | 21  | 24   | 0.90     | 0.379901 | 18  | 19  | 16  | 17  | 17  | 17  | 15  | 23  | 18  | 18   | 0.97     | 0.824629 | 16   | 1.08     | 0.353691 |
| 256566_at   | A13g19530 | hyothetical protein                                                                  | 24  | 25  | 31  | 33   | 29   | 34   | 27  | 32   | 0.84     | 0.130522 | 21  | 25  | 26  | 26  | 23  | 22  | 30  | 22  | 24  | 0.98 | 0.862583 | 24       | 1.02 | 0.829075 |          |
| 256567_at   | A13g19553 | amino acid permease, putative contains amino acid permease family protein            | 65  | 78  | 82  | 89   | 107  | 73   | 75  | 89   | 0.84     | 0.265419 | 58  | 57  | 66  | 74  | 69  | 63  | 69  | 73  | 60  | 0.90 | 0.146239 | 65       | 0.82 | 0.396659 |          |
| 256568_at   | A13g19520 | hyothetical protein, supported by full-expressed protein                             | 212 | 277 | 292 | 321  | 329  | 275  | 261 | 308  | 0.84     | 0.185929 | 275 | 287 | 296 | 386 | 340 | 322 | 287 | 300 | 286 | 0.87 | 0.133920 | 350      | 0.82 | 0.033590 |          |
| 256569_at   | A13g19550 | hyothetical protein, supported by full-expressed protein                             | 36  | 55  | 46  | 80   | 71   | 68   | 45  | 73   | 0.62     | 0.014526 | 71  | 66  | 83  | 93  | 82  | 69  | 52  | 52  | 73  | 70   | 1.05     | 0.787054 | 82   | 0.90     | 0.373519 |
| 256570_at   | A13g19540 | unknown protein, supported by cDNA-expressed protein                                 | 276 | 313 | 357 | 311  | 368  | 304  | 315 | 327  | 0.96     | 0.715077 | 343 | 365 | 356 | 417 | 320 | 309 | 330 | 308 | 355 | 337  | 1.05     | 0.545201 | 349  | 1.02     | 0.873873 |
| 256571_at   | A13g30730 | hyothetical protein predicted by oensc hyothetical protein                           | 10  | 10  | 12  | 8    | 5    | 5    | 10  | 6    | 1.74     | 0.020477 | 8   | 6   | 6   | 7   | 6   | 7   | 5   | 6   | 7   | 6    | 1.10     | 0.389851 | 7    | 1.03     | 0.826067 |
| 256572_at   | A13g30740 | 40S RIBOSOMAL PROTEIN S25, oute 40S ribosomal protein S25 (RPS25C), d                | 4   | 6   | 4   | 5    | 4    | 4    | 5   | 4    | 1.03     | 0.852224 | 4   | 5   | 4   | 7   | 6   | 10  | 10  | 6   | 4   | 8    | 0.54     | 0.030984 | 8    | 0.55     | 0.063549 |
| 256573_s_at | A13g32900 | hyothetical protein predicted by oener hyothetical protein /// Ulo1 protease f       | 56  | 59  | 82  | 76   | 80   | 65   | 66  | 74   | 0.89     | 0.428687 | 30  | 31  | 46  | 50  | 39  | 34  | 42  | 41  | 36  | 41   | 0.86     | 0.300579 | 41   | 0.87     | 0.468469 |
| 256579_at   | A13g32910 | hyothetical protein predicted by oener pseudogene, hyothetical protein               | 8   | 4   | 15  | 6    | 5    | 5    | 9   | 5    | 1.79     | 0.295347 | 7   | 6   | 7   | 4   | 6   | 7   | 8   | 5   | 7   | 6    | 1.15     | 0.425315 | 6    | 1.20     | 0.336965 |
| 256580_at   | A13g32917 | polyprotein, putative similar to polytopr opyvi-like retrotransposon family /// opy  | 10  | 9   | 13  | 15   | 11   | 14   | 10  | 13   | 0.79     | 0.146059 | 10  | 12  | 12  | 12  | 16  | 16  | 17  | 10  | 11  | 14   | 0.78     | 0.160490 | 15   | 0.76     | 0.088449 |
| 256581_at   | A1g42540  | ligand-gated ion channel, putative con glutamate receptor family protein (GLR3       | 131 | 146 | 159 | 172  | 171  | 145  | 145 | 177  | 0.82     | 0.220352 | 115 | 105 | 127 | 163 | 145 | 124 | 153 | 145 | 116 | 146  | 0.79     | 0.020628 | 144  | 0.80     | 0.090295 |
| 256582_at   | A1g42550  | unknown protein                                                                      | 79  | 135 | 166 | 85   | 104  | 73   | 127 | 87   | 1.45     | 0.216645 | 125 | 141 | 145 | 127 | 97  | 79  | 140 | 135 | 137 | 116  | 1.18     | 0.241175 | 101  | 1.35     | 0.079310 |
| 256583_at   | A1g42480  | unknown protein supported by full-lenor expressed protein                            | 512 | 618 | 604 | 743  | 783  | 674  | 578 | 733  | 0.79     | 0.028174 | 560 | 579 | 583 | 857 | 625 | 581 | 630 | 608 | 574 | 660  | 0.87     | 0.243880 | 688  | 0.83     | 0.256675 |
| 256584_at   | A1g42560  | Mlo-like protein similar to Mlo/Hordeum severe transmembrane MLO family prote        | 18  | 23  | 34  | 24   | 22   | 27   | 25  | 24   | 1.03     | 0.878280 | 15  | 21  | 18  | 19  | 19  | 23  | 19  | 18  | 18  | 20   | 0.93     | 0.436303 | 20   | 0.90     | 0.358792 |
| 256585_at   | A1g42560  | oxidoeductase, putative contains Pfan oxidoeductase N-terminal domain-cont           | 112 | 176 | 177 | 130  | 148  | 100  | 155 | 126  | 1.23     | 0.318178 | 106 | 137 | 118 | 207 | 148 | 129 | 157 | 137 | 120 | 156  | 1.05     | 0.118433 | 161  | 0.75     | 0.177232 |
| 256586_at   | A1g56020  | terpene synthase, putative contains Pf terpene synthase/cyclase family protein       | 16  | 18  | 25  | 22   | 19   | 23   | 20  | 21   | 0.94     | 0.692002 | 15  | 13  | 16  | 18  | 13  | 15  | 17  | 15  | 14  | 16   | 0.91     | 0.269045 | 16   | 0.92     | 0.457843 |
| 256587_at   | A1g68150  | receptor protein kinase (TMK1), putati leucine-rich repeat protein kinase, putati    | 676 | 708 | 715 | 699  | 764  | 557  | 700 | 673  | 1.04     | 0.691996 | 556 | 616 | 625 | 855 | 623 | 489 | 767 | 766 | 599 | 700  | 0.86     | 0.291841 | 656  | 0.91     | 0.630491 |
| 256588_at   | A1g68170  | PHD-finger protein, putative F PHD finger family protein (MMD1)                      | 15  | 9   | 15  | 15   | 13   | 18   | 13  | 15   | 0.86     | 0.452258 | 11  | 12  | 12  | 8   | 7   | 11  | 10  | 8   | 11  | 9    | 1.33     | 0.031254 | 8    | 1.37     | 0.074931 |
| 256589_at   | A1g68080  | hyothetical protein predicted by full-len U-box domain-containing protein            | 26  | 24  | 175 | 259  | 535  | 242  | 196 | 345  | 0.57     | 0.204110 | 179 | 222 | 209 | 269 | 197 | 191 | 195 | 193 | 203 | 209  | 0.97     | 0.804624 | 219  | 0.93     | 0.610916 |
| 256590_at   | A1g68110  | hyothetical protein predicted by oensc hyothetical protein                           | 48  | 50  | 41  | 46   | 48   | 45   | 39  | 47   | 0.74     | 0.094708 | 34  | 37  | 32  | 37  | 32  | 34  | 39  | 38  | 34  | 40   | 0.81     | 0.919895 | 34   | 1.05     | 0.665514 |
| 256592_at   | A1g68030  | hyothetical protein                                                                  | 45  | 56  | 69  | 68   | 77   | 65   | 57  | 70   | 0.87     | 0.164399 | 44  | 44  | 53  | 58  | 40  | 47  | 52  | 51  | 47  | 50   | 0.95     | 0.626420 | 48   | 0.97     | 0.854412 |
| 256593_at   | A1g68120  | AMP-binding enzyme, putative contains acyl-activating enzyme 11 (AAE11)              | 26  | 32  | 43  | 37   | 41   | 38   | 34  | 39   | 0.88     | 0.421990 | 23  | 21  | 27  | 31  | 27  | 24  | 23  | 26  | 24  | 26   | 0.91     | 0.344693 | 27   | 0.87     | 0.291877 |
| 256594_at   | A1g68160  | unknown protein supported by full-lenr U-box domain-containing protein               | 31  | 18  | 35  | 26   | 34   | 25   | 28  | 29   | 0.99     | 0.963367 | 18  | 17  | 12  | 16  | 13  | 17  | 21  | 22  | 16  | 18   | 0.88     | 0.473100 | 15   | 1.03     | 0.843801 |
| 256595_at   | A1g68070  | unknown protein supported by full-lenr translation initiation factor-related         | 421 | 455 | 536 | 585  | 491  | 419  | 537 | 0.78 | 0.028195 | 440      | 454 | 468 | 692 | 534 | 476 | 473 | 450 | 454 | 525 | 0.87 | 0.255416 | 567      | 0.80 | 0.156605 |          |
| 256596_at   | A1g68200  | glutamine synthetase, putative similar: glutamine synthetase, putative               | 597 | 798 | 737 | 479  | 410  | 351  | 711 | 413  | 1.72     | 0.013214 | 613 | 635 | 768 | 697 | 461 | 432 | 492 | 478 | 672 | 512  | 1.31     | 0.068902 | 530  | 1.27     | 0.216243 |
| 256597_at   | A1g68180  | unknown protein supported by full-lenr asparaty protease family protein              | 953 | 755 | 982 | 1456 | 1647 | 1151 | 900 | 1418 | 0.63     | 0.032685 | 491 | 476 | 385 | 898 | 686 | 602 | 863 | 879 | 450 | 776  | 0.58     | 0.010763 | 712  | 0.63     | 0.057756 |
| 256598_at   | A1g69090  | disease resistance protein, putative sr U-box disease resistance protein (TIR-NBS da | 19  | 15  | 29  | 24   | 21   | 24   | 21  | 23   | 0.92     | 0.670355 | 17  | 21  | 22  | 20  | 20  | 17  | 23  | 18  | 20  | 20   | 1.01     | 0.932787 | 19   | 1.04     | 0.684900 |
| 256599_at   | A1g68100  | thionin, putative similar to thionin (Pta)                                           | 28  | 34  | 31  | 36   | 42   | 34   | 39  | 35   | 0.80     | 0.048147 | 34  | 35  | 33  | 29  | 26  | 24  | 23  | 24  | 26  | 25   | 1.02     | 0.874803 | 24   | 0.98     | 0.894645 |
| 256600_at   | A1g68140  | C2H2-type zinc finger protein, putative zinc finger (C2H2 type) family protein       | 49  | 54  | 75  | 73   | 79   | 69   | 59  | 74   | 0.81     | 0.159562 | 51  | 51  | 61  | 57  | 55  | 53  | 51  | 54  | 54  | 54   | 1.00     | 0.970700 | 55   | 0.98     | 0.772556 |
| 256601_at   | A1g33260  | protein kinase, putative contains Pfam protein kinase family protein                 | 120 | 137 | 165 | 206  | 214  | 162  | 141 | 194  | 0.73     | 0.061080 | 89  | 84  | 106 | 165 | 126 | 111 | 120 | 106 | 93  | 126  | 0.74     | 0.069080 | 134  | 0.69     | 0.078549 |
| 256602_at   | A1g33290  | unknown protein                                                                      | 173 | 277 | 276 | 236  | 277  | 209  | 242 | 241  | 1.00     | 0.978354 | 225 | 243 | 243 | 312 | 268 | 240 | 297 | 255 | 237 | 274  | 0.86     | 0.086299 | 273  | 0.87     | 0.107106 |
| 256603_s_at | A1g33320  | oxathionine gamma-synthase, putative oxathionine gamma-synthase, chloroc             | 27  | 24  | 21  | 29   | 32   | 35   | 31  | 32   | 0.97     | 0.869059 | 17  | 23  | 19  | 19  | 20  | 16  | 20  | 19  | 18  | 1.05 | 0.530848 | 19       | 1.07 | 0.525552 |          |
| 256604_at   | A1g33350  | PPR-repeat protein, putative contains PPR-repeat-peptide (PPR) repeat-containi       | 38  | 50  | 52  | 57   | 60   | 52   | 47  | 56   | 0.83     | 0.125653 | 38  | 45  | 38  | 45  | 37  | 38  | 43  | 37  | 38  | 0.97 | 0.842563 | 43       | 0.87 | 0.079308 |          |
| 256605_at   | A1g33250  | unknown protein                                                                      | 311 | 415 | 419 | 408  | 474  | 342  | 382 | 408  | 0.94     | 0.642038 | 297 | 252 | 288 | 374 | 304 | 283 | 387 | 376 | 279 | 345  | 0.81     | 0.072148 | 320  | 0.87     | 0.251291 |
| 256606_at   | A1g33270  | unknown protein                                                                      | 171 | 250 | 257 | 284  | 298  | 222  | 226 | 268  | 0.84     | 0.308081 | 203 | 196 | 211 | 307 | 239 | 224 | 226 | 220 | 203 | 243  | 0.84     | 0.119737 | 257  | 0.79     | 0.110122 |
| 256607_at   | A1g33280  | unknown protein                                                                      | 13  | 15  | 17  | 18   | 25   | 14   | 15  | 15   | 0.79     | 0.340848 | 15  | 10  | 16  | 17  | 13  | 11  | 14  | 14  | 14  | 14   | 1.00     | 0.978653 | 14   | 1.01     | 0.961708 |
| 256608_at   | A1g33330  | peptide chain release factor, putative                                               | 110 | 142 | 172 | 186  | 141  | 169  | 110 | 142  | 0.84     | 0.071718 | 134 | 164 | 159 | 210 | 173 | 254 | 191 | 210 | 181 | 211  | 0.84     | 0.046877 | 224  | 0.80     | 0.120055 |
| 256609_at   | A1g33340  | unknown protein                                                                      | 23  | 29  | 38  | 39   | 36   | 30   | 35  | 0.85 | 0.302910 | 28       | 32  | 41  | 34  | 31  | 32  | 40  | 36  | 34  | 35  | 0.96 | 0.729477 | 33       | 1.03 | 0.871180 |          |
| 256610_at   | A1g33360  | ATP-dependent Clp protease ATP-bin ATP-dependent Clp protease ATP-bindi              | 62  | 87  | 86  | 85   | 98   | 69   | 77  | 84   | 0.92     | 0.588814 | 51  | 48  | 57  | 57  | 57  | 55  | 52  | 51  | 52  | 53   | 0.99     | 0.916572 | 53   | 0.98     | 0.841299 |
| 256611_at   | A1g33390  | RNA helicase, putative similar to Gi-17 helicase domain-containing protein           | 275 | 319 | 425 | 227  | 237  | 196  | 339 | 220  | 1.54     | 0.067040 | 155 | 139 | 187 |     |     |     |     |     |     |      |          |          |      |          |          |

|             |           |                                                                                       |      |      |      |      |      |      |      |      |          |          |      |      |      |      |      |      |      |      |      |      |          |          |      |          |          |
|-------------|-----------|---------------------------------------------------------------------------------------|------|------|------|------|------|------|------|------|----------|----------|------|------|------|------|------|------|------|------|------|------|----------|----------|------|----------|----------|
| 256468_at   | A1fg32550 | ferredoxin, putative similar to GB.D906 ferredoxin family protein                     | 118  | 188  | 164  | 213  | 215  | 174  | 157  | 201  | 0.78     | 0.146451 | 152  | 169  | 165  | 256  | 192  | 176  | 166  | 162  | 196  | 0.83 | 0.156101 | 213      | 0.76 | 0.079459 |          |
| 256469_at   | A1fg32550 | zinc-finger protein, putative similar to C zinc finger protein, putative              | 48   | 74   | 60   | 232  | 226  | 178  | 61   | 212  | 0.29     | 0.001270 | 70   | 84   | 85   | 387  | 220  | 260  | 175  | 183  | 80   | 0.45 | 0.018450 | 289      | 0.28 | 0.014285 |          |
| 256470_at   | A1fg42570 | hydropetal protein predicted by cener pseudogene, similar to P0529E05.9 /// o         | 11   | 10   | 9    | 11   | 12   | 12   | 10   | 12   | 0.84     | 0.110072 | 7    | 7    | 13   | 9    | 12   | 7    | 10   | 8    | 9    | 0.99 | 0.989254 | 9        | 0.97 | 0.925124 |          |
| 256471_at   | A1fg42580 | hydropetal protein predicted by cener pseudogene, similar to P0529E05.9 /// o         | 26   | 254  | 202  | 30   | 24   | 28   | 23   | 268  | 0.90     | 0.473869 | 33   | 33   | 42   | 34   | 31   | 35   | 36   | 30   | 41   | 1.02 | 0.811086 | 32       | 1.02 | 0.925124 |          |
| 256472_at   | A1fg42610 | unknown protein                                                                       | 10   | 9    | 8    | 17   | 8    | 12   | 9    | 12   | 0.73     | 0.293713 | 8    | 14   | 10   | 16   | 13   | 15   | 9    | 11   | 11   | 13   | 0.85     | 0.409257 | 15   | 0.74     | 0.110843 |
| 256473_at   | A1fg42630 | unknown protein                                                                       | 22   | 32   | 30   | 31   | 27   | 28   | 29   | 0.98 | 0.854463 | 31       | 34   | 35   | 29   | 26   | 25   | 36   | 28   | 34   | 28   | 1.18 | 0.102033 | 26       | 1.27 | 0.011858 |          |
| 256474_at   | A1fg42640 | unknown protein                                                                       | 23   | 26   | 35   | 31   | 29   | 36   | 28   | 32   | 0.87     | 0.357738 | 27   | 26   | 31   | 26   | 21   | 29   | 26   | 25   | 28   | 1.23 | 0.207082 | 22       | 1.27 | 0.082971 |          |
| 256475_at   | A1fg42680 | zinc finger protein, putative similar to ANM2, putative sir                           | 11   | 11   | 8    | 7    | 8    | 9    | 6    | 8    | 1.05     | 0.741055 | 6    | 7    | 7    | 5    | 6    | 7    | 8    | 7    | 9    | 0.97 | 0.865495 | 7        | 1.04 | 0.073735 |          |
| 256476_at   | A1fg42697 | TNP2-like transposon protein similar to CACTA-like transposase family (Tno2E)         | 7    | 7    | 7    | 7    | 8    | 8    | 7    | 8    | 0.93     | 0.227535 | 6    | 9    | 8    | 5    | 7    | 8    | 9    | 5    | 8    | 7    | 1.11     | 0.596748 | 7    | 1.14     | 0.015249 |
| 256477_at   | A1fg42690 | unknown protein                                                                       | 18   | 17   | 21   | 27   | 21   | 20   | 19   | 23   | 0.82     | 0.196230 | 16   | 16   | 18   | 21   | 16   | 12   | 21   | 14   | 17   | 17   | 0.99     | 0.938183 | 16   | 1.02     | 0.911275 |
| 256478_at   | A1fg42650 | unknown protein                                                                       | 35   | 34   | 36   | 35   | 42   | 37   | 34   | 38   | 0.90     | 0.186706 | 26   | 26   | 36   | 30   | 26   | 32   | 34   | 28   | 29   | 30   | 0.97     | 0.799277 | 29   | 1.00     | 0.993460 |
| 256479_at   | A1fg33400 | unknown protein                                                                       | 172  | 254  | 270  | 263  | 424  | 216  | 233  | 258  | 0.90     | 0.473869 | 231  | 185  | 220  | 275  | 243  | 202  | 268  | 256  | 212  | 249  | 0.85     | 0.113734 | 240  | 0.88     | 0.327910 |
| 256480_at   | A1fg33410 | unknown protein                                                                       | 412  | 537  | 514  | 587  | 644  | 465  | 488  | 565  | 0.86     | 0.302325 | 375  | 293  | 430  | 456  | 358  | 394  | 384  | 366  | 409  | 0.89 | 0.309388 | 423      | 0.87 | 0.329232 |          |
| 256481_at   | A1fg33430 | elicitor response protein, putative siml galactosyltransferase family protein         | 54   | 81   | 72   | 75   | 88   | 63   | 69   | 76   | 0.91     | 0.562605 | 45   | 45   | 44   | 47   | 50   | 50   | 47   | 42   | 45   | 47   | 0.95     | 0.311068 | 49   | 0.92     | 0.008527 |
| 256447_at   | A1fg33440 | nitrate transporter NTL1, putative siml protein-dependent oligopeptide transport      | 26   | 42   | 43   | 48   | 44   | 41   | 37   | 44   | 0.84     | 0.384250 | 34   | 37   | 44   | 42   | 34   | 43   | 43   | 38   | 38   | 40   | 0.96     | 0.648692 | 40   | 0.97     | 0.771992 |
| 256448_s_at | A1fg33450 | unknown protein                                                                       | 46   | 56   | 57   | 65   | 66   | 59   | 53   | 63   | 0.84     | 0.072416 | 51   | 41   | 52   | 56   | 52   | 35   | 62   | 60   | 48   | 53   | 0.90     | 0.482278 | 48   | 1.00     | 0.989479 |
| 256449_at   | A1fg33460 | mutator transposase MUDRA, putative Mutator-like transposase family                   | 51   | 63   | 77   | 74   | 75   | 71   | 64   | 73   | 0.87     | 0.276104 | 54   | 57   | 54   | 56   | 51   | 51   | 60   | 60   | 55   | 56   | 0.98     | 0.762486 | 53   | 1.04     | 0.378701 |
| 256419_at   | A1fg33470 | RNA-binding protein similar to G1:8292: RNA recognition motif (RRM)-containing        | 84   | 121  | 105  | 119  | 125  | 130  | 103  | 124  | 0.83     | 0.140409 | 55   | 58   | 69   | 75   | 50   | 55   | 78   | 69   | 61   | 65   | 0.93     | 0.574977 | 60   | 1.01     | 0.944004 |
| 256420_at   | A1fg33480 | unknown protein                                                                       | 46   | 76   | 88   | 74   | 92   | 67   | 70   | 78   | 0.90     | 0.623962 | 38   | 38   | 40   | 46   | 44   | 39   | 40   | 46   | 39   | 43   | 0.90     | 0.101651 | 43   | 0.91     | 0.157147 |
| 256421_at   | A1fg33500 | hydropetal protein predicted by cener hydrophobic protein                             | 42   | 50   | 51   | 35   | 65   | 39   | 48   | 46   | 1.03     | 0.887926 | 27   | 32   | 23   | 29   | 25   | 24   | 33   | 30   | 27   | 28   | 0.97     | 0.747908 | 26   | 1.04     | 0.705273 |
| 256422_at   | A1fg33520 | unknown protein                                                                       | 249  | 229  | 299  | 294  | 263  | 213  | 282  | 0.76 | 0.007218 | 145      | 178  | 179  | 235  | 168  | 160  | 191  | 168  | 168  | 184  | 0.91 | 0.430729 | 168      | 0.89 | 0.481724 |          |
| 256423_at   | A1fg33540 | serine carboxypeptidase, putative siml serine carboxypeptidase S10 family prot        | 18   | 17   | 22   | 20   | 23   | 18   | 19   | 20   | 0.93     | 0.534939 | 15   | 17   | 14   | 14   | 15   | 12   | 11   | 14   | 15   | 13   | 1.16     | 0.134004 | 14   | 1.11     | 0.329824 |
| 256424_at   | A1fg33490 | unknown protein: supported by full-length expressed protein                           | 200  | 278  | 289  | 336  | 336  | 266  | 255  | 312  | 0.82     | 0.191553 | 258  | 307  | 310  | 473  | 326  | 330  | 304  | 294  | 292  | 346  | 0.84     | 0.278875 | 377  | 0.77     | 0.173201 |
| 256425_at   | A1fg33560 | disease resistance protein, putative sir disease resistance protein (CC-NBS-LR        | 82   | 60   | 97   | 163  | 122  | 110  | 80   | 132  | 0.60     | 0.054153 | 157  | 141  | 167  | 307  | 231  | 200  | 284  | 274  | 155  | 259  | 0.60     | 0.007412 | 246  | 0.63     | 0.049705 |
| 256426_at   | A1fg33420 | hydropetal protein predicted by cener PHD finger family protein                       | 86   | 476  | 489  | 548  | 586  | 477  | 444  | 537  | 0.83     | 0.137386 | 356  | 281  | 353  | 505  | 474  | 375  | 455  | 435  | 330  | 449  | 0.74     | 0.013045 | 451  | 0.73     | 0.055270 |
| 256427_at   | A1fg11090 | hydropetal protein predicted by cener LOB domain family protein / lateral org         | 36   | 54   | 35   | 41   | 55   | 42   | 42   | 46   | 0.91     | 0.625238 | 31   | 33   | 34   | 39   | 35   | 34   | 34   | 40   | 39   | 33   | 0.88     | 0.038316 | 36   | 0.91     | 0.147480 |
| 256428_at   | A1fg11080 | putative disease resistance protein sim disease resistance family protein             | 22   | 17   | 32   | 26   | 24   | 33   | 24   | 28   | 0.86     | 0.471085 | 21   | 25   | 27   | 26   | 19   | 18   | 30   | 28   | 24   | 24   | 1.01     | 0.972421 | 21   | 1.15     | 0.395553 |
| 256429_at   | A1fg11040 | unknown protein                                                                       | 88   | 126  | 94   | 115  | 133  | 91   | 102  | 113  | 0.90     | 0.557824 | 80   | 68   | 86   | 98   | 90   | 78   | 90   | 80   | 78   | 87   | 0.89     | 0.199966 | 89   | 0.88     | 0.253488 |
| 256430_at   | A1fg11020 | DREB2B transcription factor identical to DRE-binding protein (DREB2B)                 | 126  | 171  | 240  | 209  | 327  | 208  | 179  | 248  | 0.72     | 0.254503 | 96   | 99   | 93   | 97   | 78   | 106  | 94   | 97   | 96   | 95   | 1.02     | 0.821040 | 94   | 1.03     | 0.732666 |
| 256431_s_at | A1fg11010 | putative disease resistance protein sim disease resistance family protein / LRR       | 35   | 35   | 41   | 35   | 48   | 41   | 43   | 51   | 0.85     | 0.112412 | 24   | 24   | 23   | 29   | 25   | 25   | 29   | 28   | 25   | 29   | 0.83     | 0.791122 | 24   | 1.15     | 0.462866 |
| 256432_at   | A1fg10990 | hydropetal protein similar to hydropetal-F-box family protein                         | 36   | 47   | 67   | 57   | 56   | 56   | 50   | 57   | 0.88     | 0.505861 | 40   | 45   | 51   | 47   | 39   | 40   | 51   | 49   | 45   | 45   | 1.01     | 0.924353 | 42   | 1.09     | 0.416476 |
| 256433_at   | A1fg10980 | unknown protein                                                                       | 498  | 593  | 653  | 769  | 916  | 636  | 581  | 773  | 0.75     | 0.106421 | 882  | 1041 | 700  | 907  | 755  | 787  | 1073 | 1012 | 874  | 907  | 0.96     | 0.777607 | 816  | 1.07     | 0.621084 |
| 256434_at   | A1fg10950 | putative 60S ribosomal protein L37a sir 60S ribosomal protein L37a (RPL37aB)          | 8    | 9    | 12   | 10   | 10   | 11   | 10   | 11   | 0.92     | 0.544282 | 8    | 9    | 7    | 9    | 8    | 8    | 11   | 8    | 9    | 8    | 0.85     | 0.150327 | 9    | 0.88     | 0.235681 |
| 256435_at   | A1fg11180 | putative leucanthroxenindol dimerase similar to oxidoreductase, 2OG-FerH oxovanone    | 13   | 14   | 19   | 18   | 17   | 16   | 15   | 17   | 0.81     | 0.423957 | 15   | 17   | 12   | 14   | 12   | 17   | 13   | 13   | 13   | 13   | 1.01     | 0.953252 | 13   | 1.13     | 0.483765 |
| 256436_at   | A1fg11150 | hydropetal protein predicted by cener expressed protein                               | 37   | 38   | 55   | 66   | 62   | 53   | 43   | 60   | 0.72     | 0.073111 | 28   | 25   | 31   | 25   | 25   | 30   | 30   | 24   | 28   | 27   | 1.05     | 0.515825 | 27   | 1.06     | 0.533751 |
| 256437_s_at | A1fg11130 | putative clathrin heavy chain predicted to clathrin heav chain, putative /// clathrin | 1231 | 1469 | 1569 | 1778 | 1869 | 1522 | 1423 | 1723 | 0.83     | 0.106257 | 823  | 726  | 896  | 1092 | 975  | 775  | 1011 | 942  | 815  | 959  | 0.85     | 0.115288 | 947  | 0.86     | 0.274024 |
| 256438_s_at | A1fg11120 | ribosomal protein L41 identical to ribos 60S ribosomal protein L41 (RPL41C) ///       | 1691 | 2011 | 2103 | 2114 | 2209 | 1885 | 1935 | 2069 | 0.94     | 0.442980 | 945  | 911  | 1078 | 1322 | 962  | 956  | 1236 | 1271 | 978  | 1149 | 0.85     | 0.175573 | 1080 | 0.91     | 0.480760 |
| 256439_at   | A1fg10920 | putative MnH superoxide dismutase sir superoxide dismutase (Mn), mitochondr           | 1406 | 1659 | 1863 | 1989 | 2429 | 1877 | 1677 | 2149 | 0.78     | 0.103821 | 1920 | 1902 | 1959 | 2607 | 2297 | 2159 | 1971 | 1966 | 1924 | 2066 | 0.87     | 0.123259 | 2354 | 0.85     | 0.033054 |
| 256440_at   | A1fg10970 | unknown protein: supported by full-length haloacid dehalogenase-like hydrolase fa     | 265  | 369  | 362  | 341  | 358  | 280  | 332  | 326  | 1.02     | 0.894469 | 305  | 294  | 343  | 427  | 327  | 311  | 357  | 333  | 314  | 351  | 0.89     | 0.250263 | 355  | 0.88     | 0.351951 |
| 256441_at   | A1fg10940 | unknown protein: supported by full-length protein phosphatase-related                 | 302  | 413  | 385  | 513  | 613  | 461  | 367  | 529  | 0.69     | 0.043655 | 374  | 415  | 407  | 648  | 511  | 461  | 491  | 450  | 399  | 512  | 0.78     | 0.057748 | 540  | 0.74     | 0.069347 |
| 256442_at   | A1fg10930 | hydropetal protein predicted by cener hydropetal protein predicted by cener           | 48   | 27   | 38   | 60   | 60   | 49   | 38   | 56   | 0.67     | 0.053642 | 15   | 16   | 17   | 16   | 11   | 9    | 19   | 22   | 16   | 15   | 1.04     | 0.872186 | 12   | 1.34     | 0.103379 |
| 256443_at   | A1fg10960 | hydropetal protein similar to hydropetal-xanthineuracil permease family protein       | 83   | 115  | 110  | 113  | 117  | 103  | 102  | 111  | 0.82     | 0.473836 | 81   | 69   | 75   | 85   | 72   | 79   | 80   | 73   | 75   | 78   | 0.96     | 0.529913 | 79   | 0.95     | 0.512694 |
| 256444_at   | A1fg11060 | hydropetal protein predicted by cener hydropetal protein                              | 38   | 52   | 33   | 32   | 33   | 32   | 33   | 35   | 0.91     | 0.112412 | 24   | 23   | 27   | 27   | 27   | 27   | 27   | 27   | 27   | 27   | 1.11     | 0.347112 | 27   | 1.08     | 0.509713 |
| 256445_at   | A1fg11160 | hydropetal protein predicted by cener xanthine protein                                | 26   | 36   | 43   | 32   | 39   | 36   | 35   | 35   | 0.99     | 0.934388 | 24   | 22   | 23   | 23   | 22   | 15   | 25   | 17   | 23   | 20   | 1.12     | 0.356913 | 20   | 1.15     | 0.306305 |
| 256446_at   | A1fg11110 | RING zinc finger protein contains Pfanz zinc finger (C3HC4-type RING finger) fa       | 23   | 22   | 26   | 27   | 28   | 30   | 24   | 28   | 0.85     | 0.032805 | 18   | 19   | 23   | 20   | 19   | 23   | 18   | 24   | 17   | 20   | 1.01     | 0.937912 | 19   | 1.04     | 0.657881 |
| 256412_at   | A1fg11220 | hydropetal protein predicted by cener Phoxin protein-related                          | 56   | 55   | 52   | 61   | 75   | 54   | 54   | 63   | 0.86     | 0.212737 | 41   | 41   | 44   | 52   | 44   | 39   | 44   | 38   | 42   | 43   | 0.97     | 0.177636 | 45   | 0.94     | 0.518038 |
| 256413_at   | A1fg11100 | hydropetal protein predicted by cener expressed protein                               | 122  | 133  | 122  | 237  | 158  | 183  | 235  | 0.78 | 0.399864 | 158      | 238  | 183  | 208  | 216  | 204  | 215  | 204  | 176  | 193  | 216  | 0.89     | 0.445900 | 234  | 0.91     | 0.275652 |
| 256414_at   | A1fg11200 | putative nucleic acid binding protein sir PHD finger family protein                   | 370  | 473  | 468  | 595  | 635  | 506  | 437  | 579  | 0.76     | 0.049670 | 426  | 455  | 440  | 663  | 540  | 489  | 506  | 462  | 440  | 532  | 0.83     | 0.090633 | 564  | 0.78     | 0.076382 |
| 256415_at   | A1fg11210 | unknown protein: supported by full-length GDSL-motif lipase/hydrolase family prot     | 31   | 155  | 162  | 155  | 163  | 136  | 149  | 152  | 0.98     | 0.849781 | 146  | 178  | 165  | 225  | 147  | 174  | 153  | 163  | 143  | 174  | 0.94     | 0.597522 | 181  | 0.90     | 0.517415 |

|             |           |                                                                                     |     |      |     |      |      |      |     |      |          |          |      |      |      |      |      |      |      |      |      |      |          |          |      |          |          |
|-------------|-----------|-------------------------------------------------------------------------------------|-----|------|-----|------|------|------|-----|------|----------|----------|------|------|------|------|------|------|------|------|------|------|----------|----------|------|----------|----------|
| 256374_at   | At1g66730 | DNA ligase I, putative similar to DNA II ATP dependent DNA ligase family protein    | 123 | 170  | 186 | 176  | 204  | 153  | 160 | 178  | 0.80     | 0.492467 | 62   | 54   | 68   | 77   | 69   | 68   | 75   | 73   | 62   | 72   | 0.85     | 0.032449 | 71   | 0.86     | 0.131844 |
| 256375_at   | At1g66720 | unknown protein                                                                     | 18  | 22   | 26  | 23   | 28   | 28   | 22  | 26   | 0.84     | 0.128299 | 19   | 20   | 22   | 22   | 19   | 18   | 22   | 18   | 21   | 20   | 1.05     | 0.521622 | 20   | 1.06     | 0.440307 |
| 256376_s_at | At1g66690 | unknown protein                                                                     | 4   | 6    | 8   | 9    | 9    | 5    | 9   | 5    | 0.81     | 0.014095 | 5    | 10   | 7    | 9    | 7    | 8    | 7    | 8    | 8    | 7    | 1.01     | 0.966921 | 8    | 0.98     | 0.925953 |
| 256377_at   | At1g66640 | severe combined immunodeficiency protein                                            | 79  | 83   | 88  | 106  | 71   | 78   | 94  | 84   | 0.84     | 0.417633 | 52   | 61   | 59   | 68   | 69   | 69   | 69   | 69   | 69   | 69   | 0.90     | 0.330931 | 63   | 0.90     | 0.152529 |
| 256378_at   | At1g66830 | receptor protein kinase, putative cDNA: kinase-rich repeat transmembrane prot       | 34  | 39   | 45  | 42   | 48   | 37   | 39  | 42   | 0.93     | 0.502947 | 29   | 35   | 32   | 31   | 27   | 32   | 34   | 32   | 32   | 31   | 1.02     | 0.734207 | 30   | 1.07     | 0.401067 |
| 256379_at   | At1g66840 | hypothetical protein predicted by geneic expressed protein                          | 24  | 33   | 37  | 37   | 45   | 32   | 31  | 38   | 0.82     | 0.274134 | 38   | 31   | 39   | 60   | 47   | 45   | 44   | 46   | 36   | 48   | 0.74     | 0.030573 | 51   | 0.71     | 0.057717 |
| 256380_at   | At1g66680 | pheromone receptor, putative (AR401) S locus-linked protein, putative               | 652 | 890  | 896 | 895  | 999  | 813  | 813 | 902  | 0.90     | 0.406832 | 851  | 775  | 895  | 1169 | 998  | 998  | 1037 | 1000 | 841  | 1021 | 0.82     | 0.029692 | 1022 | 0.82     | 0.103213 |
| 256381_at   | At1g66690 | late transfer protein, putative, protein inhibiting seed storage/lipid tran         | 30  | 34   | 36  | 37   | 36   | 40   | 36  | 40   | 1.29     | 0.458916 | 36   | 42   | 39   | 31   | 29   | 33   | 28   | 30   | 28   | 33   | 1.38     | 0.188648 | 39   | 1.45     | 0.024789 |
| 256382_at   | At1g66860 | unknown protein, supported by full-length expressed protein                         | 31  | 27   | 42  | 38   | 35   | 40   | 33  | 38   | 0.89     | 0.430166 | 20   | 19   | 33   | 27   | 27   | 23   | 24   | 28   | 24   | 26   | 0.94     | 0.895233 | 28   | 0.95     | 0.780152 |
| 256383_at   | At1g66820 | hypothetical protein : supported by full- glycine-rich protein                      | 180 | 221  | 240 | 235  | 248  | 227  | 214 | 237  | 0.90     | 0.282126 | 216  | 262  | 261  | 343  | 227  | 249  | 263  | 253  | 247  | 267  | 0.92     | 0.508749 | 273  | 0.90     | 0.536806 |
| 256324_at   | At1g66760 | MATE efflux family protein, putative co MATE efflux efflux (PFR) repeat-containi    | 131 | 174  | 228 | 137  | 176  | 130  | 178 | 148  | 1.20     | 0.394850 | 68   | 78   | 78   | 78   | 70   | 71   | 99   | 83   | 73   | 80   | 0.91     | 0.380411 | 73   | 0.99     | 0.949400 |
| 256325_at   | At1g66730 | hypothetical protein                                                                | 67  | 65   | 102 | 93   | 96   | 91   | 78  | 94   | 0.84     | 0.299317 | 96   | 68   | 73   | 72   | 62   | 57   | 59   | 62   | 69   | 68   | 0.92     | 0.141647 | 59   | 0.93     | 0.054272 |
| 256326_at   | At1g63240 | RING zinc-finger protein, putative cont zinc finger (C2H4-type RING finger) fa      | 156 | 267  | 288 | 232  | 280  | 197  | 237 | 237  | 1.00     | 0.895403 | 213  | 248  | 204  | 297  | 255  | 242  | 275  | 257  | 222  | 265  | 0.84     | 0.038055 | 265  | 0.84     | 0.116421 |
| 256327_at   | At1g62350 | 6-phosphogluconate dehydrogenase, 1                                                 | 320 | 321  | 367 | 432  | 466  | 366  | 336 | 421  | 0.80     | 0.062751 | 242  | 214  | 277  | 301  | 287  | 229  | 292  | 263  | 244  | 274  | 0.89     | 0.217504 | 272  | 0.90     | 0.383839 |
| 256328_at   | At1g62360 | 6-phosphogluconate dehydrogenase, 1                                                 | 813 | 1020 | 984 | 1275 | 1319 | 1075 | 939 | 1223 | 0.77     | 0.045091 | 1020 | 1022 | 1092 | 1657 | 1346 | 1110 | 1262 | 1183 | 1044 | 1312 | 0.80     | 0.081611 | 1371 | 0.76     | 0.111041 |
| 256329_at   | At1g76850 | unknown protein                                                                     | 328 | 392  | 366 | 378  | 436  | 305  | 362 | 373  | 0.97     | 0.806449 | 283  | 249  | 302  | 312  | 295  | 239  | 304  | 301  | 278  | 290  | 0.96     | 0.573240 | 282  | 0.99     | 0.885644 |
| 256330_at   | At1g76870 | hypothetical protein predicted by oener hypothetical protein                        | 50  | 67   | 81  | 103  | 62   | 61   | 82  | 0.75 | 0.198341 | 55       | 54   | 56   | 67   | 61   | 56   | 55   | 52   | 59   | 54   | 67   | 0.81     | 0.278169 | 55   | 0.98     | 0.864197 |
| 256331_at   | At1g76880 | GT-like trihelix DNA-binding protein, alpha trihelix DNA-binding protein, putative  | 467 | 560  | 487 | 539  | 658  | 516  | 505 | 571  | 0.88     | 0.272323 | 429  | 348  | 349  | 467  | 404  | 334  | 488  | 419  | 375  | 422  | 0.89     | 0.292314 | 402  | 0.93     | 0.604258 |
| 256332_at   | At1g76890 | trihelix DNA-binding protein (GT2) ider trihelix DNA-binding protein / GT-2 facto   | 27  | 28   | 35  | 41   | 36   | 31   | 30  | 36   | 0.85     | 0.230396 | 59   | 68   | 62   | 89   | 74   | 51   | 70   | 65   | 63   | 70   | 0.90     | 0.436124 | 71   | 0.88     | 0.500436 |
| 256333_at   | At1g76860 | Sm-like protein contains Pfam profile: F small nuclear rionucleoprotein, putative   | 326 | 435  | 463 | 439  | 504  | 425  | 408 | 456  | 0.89     | 0.379051 | 365  | 476  | 405  | 533  | 444  | 410  | 499  | 466  | 416  | 470  | 0.88     | 0.189282 | 462  | 0.90     | 0.394094 |
| 256334_at   | At1g72120 | oligopectate transporter, putative similr protein-dependent oligopectate transport  | 44  | 57   | 83  | 69   | 66   | 80   | 61  | 72   | 0.85     | 0.445938 | 54   | 50   | 58   | 67   | 51   | 88   | 81   | 54   | 67   | 67   | 0.81     | 0.278169 | 55   | 0.98     | 0.864197 |
| 256335_at   | At1g72110 | hypothetical protein predicted by oener expressed protein                           | 16  | 18   | 25  | 23   | 23   | 22   | 20  | 22   | 0.87     | 0.382301 | 17   | 17   | 20   | 20   | 15   | 13   | 30   | 18   | 18   | 19   | 0.93     | 0.754611 | 16   | 1.11     | 0.474299 |
| 256336_at   | At1g72030 | unknown protein                                                                     | 188 | 371  | 400 | 285  | 316  | 234  | 320 | 278  | 1.15     | 0.591573 | 272  | 294  | 282  | 483  | 358  | 352  | 379  | 373  | 283  | 389  | 0.73     | 0.016650 | 308  | 0.71     | 0.055978 |
| 256337_at   | At1g72060 | unknown protein                                                                     | 38  | 43   | 41  | 49   | 46   | 45   | 40  | 47   | 0.87     | 0.024968 | 31   | 36   | 39   | 41   | 32   | 35   | 41   | 42   | 35   | 38   | 0.92     | 0.400989 | 36   | 0.98     | 0.883293 |
| 256338_at   | At1g72100 | hypothetical protein similar to seed mat late embryoensis abundant domain- $\alpha$ | 15  | 20   | 28  | 171  | 25   | 20   | 21  | 72   | 0.29     | 0.363068 | 15   | 18   | 15   | 17   | 14   | 16   | 13   | 12   | 16   | 14   | 1.12     | 0.281108 | 15   | 1.04     | 0.697536 |
| 256339_at   | At1g72080 | hypothetical protein                                                                | 59  | 68   | 104 | 96   | 82   | 95   | 77  | 92   | 0.84     | 0.355780 | 39   | 39   | 50   | 50   | 44   | 45   | 38   | 52   | 46   | 43   | 0.92     | 0.405441 | 44   | 0.96     | 0.770196 |
| 256340_at   | At1g72070 | DnaJ protein, putative contains Pfam : DnaJ heat shock N-terminal domain-co         | 31  | 36   | 42  | 40   | 44   | 31   | 36  | 38   | 0.94     | 0.688522 | 24   | 29   | 35   | 34   | 28   | 27   | 30   | 28   | 29   | 29   | 0.99     | 0.958938 | 30   | 0.99     | 0.934784 |
| 256341_at   | At1g72040 | deoxuonuosine kinase, putative simil short-chain dehydrogenase/reductase (S         | 317 | 392  | 390 | 471  | 489  | 393  | 366 | 451  | 0.81     | 0.091850 | 278  | 251  | 316  | 401  | 352  | 323  | 364  | 348  | 282  | 358  | 0.79     | 0.013019 | 359  | 0.79     | 0.058891 |
| 256342_at   | At1g72050 | unknown protein : supported by full-length expressed protein                        | 472 | 682  | 855 | 999  | 1048 | 887  | 806 | 975  | 0.83     | 0.116114 | 956  | 1001 | 997  | 1305 | 1139 | 971  | 1048 | 1024 | 985  | 1098 | 0.90     | 0.202840 | 1138 | 0.87     | 0.190228 |
| 256343_at   | At1g72090 | unknown protein : supported by cDNA: radical SAM domain-containing protein /        | 466 | 484  | 492 | 454  | 454  | 430  | 486 | 476  | 0.81     | 0.042117 | 384  | 373  | 408  | 497  | 497  | 497  | 478  | 484  | 560  | 497  | 0.74     | 0.05517  | 496  | 0.81     | 0.057083 |
| 256344_at   | At1g72020 | C/2H2-type zinc finger protein, putative zinc finger (C2H2 type) family protein     | 672 | 816  | 594 | 673  | 705  | 567  | 557 | 648  | 0.86     | 0.227704 | 574  | 621  | 603  | 867  | 710  | 656  | 726  | 677  | 600  | 727  | 0.82     | 0.044257 | 744  | 0.81     | 0.088423 |
| 256345_at   | At1g55030 | hypothetical protein similar to hypotheti F-box family protein                      | 22  | 15   | 19  | 16   | 17   | 18   | 19  | 17   | 1.10     | 0.480553 | 17   | 16   | 18   | 16   | 18   | 19   | 17   | 15   | 17   | 17   | 0.98     | 0.752445 | 18   | 0.94     | 0.314540 |
| 256346_s_at | At1g54926 | unknown protein                                                                     | 1   | 0    | 2   | 0    | 1    | 4    | 1   | 2    | 0.86     | 0.640919 | 3    | 3    | 0    | 4    | 1    | 5    | 0    | 2    | 2    | 1.02 | 0.749324 | 2        | 1.12 | 0.875311 |          |
| 256347_at   | At1g54923 | unknown protein similar to putative die cyovai-like retrotransposon family (Altha   | 9   | 13   | 11  | 10   | 11   | 9    | 8   | 11   | 0.18     | 0.042601 | 9    | 8    | 11   | 9    | 10   | 6    | 10   | 9    | 10   | 9    | 1.00     | 0.979196 | 9    | 1.00     | 0.979196 |
| 256348_at   | At1g54880 | hypothetical protein predicted by oener hypothetical protein                        | 11  | 9    | 16  | 14   | 18   | 18   | 12  | 17   | 0.70     | 0.106562 | 9    | 5    | 10   | 9    | 10   | 9    | 8    | 8    | 9    | 9    | 0.85     | 0.226009 | 10   | 0.82     | 0.248107 |
| 256349_at   | At1g54890 | late embryoensis protein, putative sia late embryoensis abundant protein-re         | 43  | 43   | 50  | 52   | 54   | 45   | 50  | 50   | 0.90     | 0.293858 | 36   | 34   | 45   | 31   | 32   | 30   | 41   | 31   | 39   | 33   | 1.16     | 0.196966 | 31   | 1.25     | 0.091176 |
| 256350_at   | At1g54940 | hypothetical protein contains similarity I glycochenin glucosyltransferase (glycoe  | 16  | 17   | 20  | 19   | 20   | 19   | 18  | 19   | 0.90     | 0.181014 | 19   | 19   | 22   | 16   | 15   | 14   | 17   | 14   | 20   | 15   | 1.33     | 0.002834 | 15   | 1.35     | 0.012926 |
| 256351_at   | At1g54960 | NP1-related protein kinase, putative NP1-related protein kinase, putative (A        | 83  | 112  | 98  | 124  | 135  | 112  | 83  | 124  | 0.79     | 0.040713 | 98   | 65   | 92   | 106  | 107  | 92   | 106  | 107  | 92   | 94   | 0.82     | 0.451790 | 94   | 0.82     | 0.406614 |
| 256352_at   | At1g54970 | proline-rich protein, putative similar to : proline-rich family protein             | 24  | 20   | 28  | 27   | 26   | 24   | 27  | 20   | 0.90     | 0.341074 | 19   | 21   | 22   | 20   | 21   | 17   | 19   | 18   | 21   | 19   | 1.11     | 0.112581 | 19   | 1.09     | 0.285217 |
| 256353_at   | At1g55000 | unknown protein : supported by full-length peotidolysin-chain-binding LxM domain-co | 161 | 320  | 303 | 261  | 310  | 212  | 261 | 261  | 1.00     | 0.995259 | 231  | 287  | 240  | 357  | 287  | 276  | 307  | 287  | 252  | 303  | 0.83     | 0.071096 | 307  | 0.82     | 0.152711 |
| 256354_at   | At1g54870 | dormancy related protein, putative sim short-chain dehydrogenase/reductase (S       | 30  | 40   | 57  | 705  | 53   | 53   | 43  | 270  | 0.16     | 0.354302 | 24   | 26   | 28   | 32   | 33   | 26   | 35   | 29   | 26   | 31   | 0.84     | 0.058993 | 30   | 0.86     | 0.148775 |
| 256355_at   | At1g55040 | hypothetical protein predicted by oener zinc finger (Ran-binding) family protein    | 59  | 76   | 87  | 89   | 96   | 88   | 74  | 91   | 0.81     | 0.114717 | 75   | 80   | 74   | 85   | 83   | 84   | 76   | 82   | 79   | 83   | 0.85     | 0.240489 | 84   | 0.94     | 0.027087 |
| 256356_at   | At1g55020 | lipoycogenesis, putative similar to lipoyc lipoycogenesis (LXN-1)                   | 225 | 232  | 247 | 230  | 232  | 247  | 216 | 216  | 0.54     | 0.017926 | 211  | 178  | 231  | 152  | 154  | 208  | 195  | 204  | 201  | 201  | 0.51     | 0.004201 | 206  | 0.51     | 0.029523 |
| 256357_at   | At1g54990 | unknown protein : supported by cDNA: expressed protein                              | 724 | 861  | 830 | 1044 | 1120 | 888  | 805 | 1021 | 0.79     | 0.058082 | 652  | 558  | 777  | 973  | 873  | 787  | 799  | 837  | 662  | 854  | 0.78     | 0.024402 | 878  | 0.75     | 0.060045 |
| 256323_at   | At1g54920 | unknown protein : supported by cDNA: expressed protein                              | 114 | 170  | 171 | 186  | 208  | 147  | 152 | 180  | 0.84     | 0.326378 | 79   | 81   | 89   | 119  | 93   | 87   | 88   | 80   | 83   | 93   | 0.89     | 0.309181 | 100  | 0.83     | 0.182504 |
| 256292_at   | At1g69430 | hypothetical protein                                                                | 59  | 62   | 74  | 80   | 96   | 74   | 62  | 83   | 0.74     | 0.078788 | 48   | 61   | 64   | 72   | 53   | 54   | 62   | 60   | 58   | 60   | 0.96     | 0.883610 | 60   | 0.97     | 0.829107 |
| 256293_at   | At1g69440 | enhancer-like protein similar to inehat1 FPAZ domain-containing protein / diw do    | 80  | 102  | 88  | 112  | 127  | 99   | 83  | 116  | 0.75     | 0.042601 | 104  | 83   | 153  | 97   | 161  | 134  | 129  | 163  | 142  | 129  | 0.84     | 0.037443 | 146  | 0.84     | 0.040624 |
| 256294_at   | At1g69450 | unknown protein                                                                     | 87  | 113  | 88  | 99   | 73   | 91   | 87  | 104  | 0.799106 | 89       | 76   | 95   | 94   | 93   | 93   | 97   | 116  | 87   | 99   | 0.88 | 0.140026 | 93       | 0.93 | 0.291545 |          |
| 256295_at   | At1g69470 | hypothetical protein                                                                | 20  | 23   | 29  | 26   | 29   | 24   | 24  | 26   | 0.92     | 0.552809 | 21   | 22   | 21   | 24   | 22   | 17   | 21   |      |      |      |          |          |      |          |          |

|             |           |                                                                                       |      |      |      |      |      |      |      |      |          |           |      |      |      |      |      |      |      |      |      |      |          |          |          |          |          |          |
|-------------|-----------|---------------------------------------------------------------------------------------|------|------|------|------|------|------|------|------|----------|-----------|------|------|------|------|------|------|------|------|------|------|----------|----------|----------|----------|----------|----------|
| 256279_at   | A13g12620 | protein phosphatase 2C, putative cont; protein phosphatase 2C family protein /        | 97   | 123  | 126  | 136  | 143  | 119  | 115  | 133  | 0.87     | 0.214888  | 93   | 92   | 84   | 146  | 101  | 95   | 124  | 113  | 90   | 116  | 0.78     | 0.076388 | 114      | 0.79     | 0.207813 |          |
| 256280_at   | A13g12590 | unknown protein : supported by full-len expressed protein                             | 366  | 473  | 426  | 475  | 541  | 415  | 422  | 477  | 0.88     | 0.300920  | 553  | 472  | 538  | 729  | 611  | 597  | 579  | 521  | 521  | 608  | 0.86     | 0.126612 | 646      | 0.81     | 0.061421 |          |
| 256281_at   | A13g12560 | mva-family transcription factor. putative telomeric DNA-binding protein, putative     | 147  | 232  | 199  | 200  | 234  | 165  | 193  | 200  | 0.97     | 0.838686  | 142  | 113  | 146  | 174  | 148  | 119  | 160  | 145  | 134  | 149  | 0.90     | 0.325905 | 147      | 0.91     | 0.522043 |          |
| 256282_at   | A13g12550 | unknown protein : supported by full-len expressed protein                             | 161  | 202  | 200  | 202  | 312  | 236  | 193  | 270  | 0.71     | 0.045400  | 156  | 130  | 166  | 147  | 211  | 198  | 174  | 198  | 171  | 198  | 0.74     | 0.014465 | 199      | 0.74     | 0.009686 |          |
| 256283_at   | A13g12540 | hypothetical protein                                                                  | 27   | 26   | 38   | 37   | 36   | 35   | 30   | 36   | 0.84     | 0.226564  | 20   | 20   | 28   | 16   | 22   | 10   | 25   | 24   | 23   | 21   | 1.07     | 0.608082 | 19       | 1.20     | 0.272707 |          |
| 256284_at   | A13g12530 | unknown protein                                                                       | 103  | 123  | 133  | 139  | 146  | 137  | 120  | 141  | 0.85     | 0.087534  | 110  | 113  | 130  | 153  | 113  | 118  | 127  | 115  | 118  | 125  | 0.94     | 0.519320 | 128      | 0.92     | 0.509071 |          |
| 256285_at   | A13g12510 | hypothetical protein predicted by geneic expressed protein                            | 172  | 197  | 137  | 191  | 226  | 168  | 196  | 195  | 1.00     | 0.985033  | 266  | 254  | 256  | 281  | 232  | 221  | 176  | 182  | 259  | 219  | 1.18     | 0.165753 | 245      | 1.06     | 0.499532 |          |
| 256286_at   | A13g12480 | unknown protein : supported by full-len expressed protein                             | 378  | 440  | 362  | 354  | 393  | 342  | 362  | 350  | 0.89     | 0.244565  | 344  | 387  | 380  | 598  | 440  | 396  | 413  | 425  | 384  | 417  | 0.85     | 0.219217 | 475      | 0.81     | 0.225156 |          |
| 256290_at   | A13g12460 | hypothetical protein predicted by geneic hypothetical protein                         | 28   | 34   | 32   | 34   | 48   | 33   | 31   | 38   | 0.82     | 0.249654  | 18   | 25   | 24   | 30   | 27   | 25   | 26   | 21   | 22   | 26   | 0.86     | 0.201333 | 27       | 0.82     | 0.133294 |          |
| 256260_at   | A13g12440 | hypothetical protein                                                                  | 25   | 29   | 43   | 46   | 46   | 47   | 32   | 46   | 0.69     | 0.056464  | 26   | 29   | 32   | 31   | 25   | 21   | 27   | 23   | 29   | 25   | 1.13     | 0.250437 | 26       | 1.12     | 0.428930 |          |
| 256230_at   | A13g12340 | FKBP-type oestrdyl-ovrl-cis-trans iso immunohilin, putative / FKBP-type oest          | 210  | 233  | 235  | 265  | 291  | 245  | 226  | 267  | 0.85     | 0.055885  | 202  | 139  | 210  | 237  | 201  | 177  | 217  | 200  | 184  | 206  | 0.89     | 0.325190 | 205      | 0.90     | 0.494191 |          |
| 256231_La   | A13g12630 | unknown protein : supported by full-len expressed protein                             | 1160 | 1441 | 1666 | 1537 | 1797 | 1310 | 1423 | 1548 | 0.92     | 0.570059  | 1056 | 1157 | 1069 | 1661 | 1233 | 1206 | 1288 | 1275 | 1094 | 1329 | 0.82     | 0.058951 | 1367     | 0.80     | 0.144315 |          |
| 256232_at   | A13g12570 | unknown protein : supported by full-len expressed protein                             | 208  | 250  | 257  | 237  | 265  | 228  | 237  | 245  | 0.98     | 0.782652  | 253  | 245  | 251  | 356  | 291  | 346  | 351  | 320  | 314  | 379  | 0.79     | 0.053904 | 298      | 0.84     | 0.196577 |          |
| 256233_at   | A13g12360 | ankyrin-like protein contains Pfam profilin ankyrin repeat family protein             | 402  | 527  | 531  | 688  | 720  | 541  | 487  | 649  | 0.75     | 0.079622  | 411  | 380  | 407  | 629  | 552  | 467  | 618  | 605  | 400  | 574  | 0.70     | 0.004995 | 550      | 0.73     | 0.035085 |          |
| 256234_at   | A13g12370 | 50S ribosomal protein L10, putative sr ribosomal protein L10 family protein           | 382  | 518  | 506  | 524  | 635  | 483  | 469  | 547  | 0.86     | 0.277470  | 537  | 669  | 549  | 788  | 658  | 614  | 678  | 647  | 585  | 677  | 0.86     | 0.115820 | 687      | 0.85     | 0.204904 |          |
| 256235_at   | A13g12490 | cysteine reductase inhibitor, putative / cysteine reductase inhibitor, putative / cys | 787  | 975  | 1033 | 1241 | 1373 | 1038 | 932  | 1217 | 0.77     | 0.080131  | 1254 | 1367 | 1143 | 1786 | 1576 | 1397 | 1557 | 1434 | 1254 | 1550 | 0.81     | 0.028136 | 1586     | 0.79     | 0.062890 |          |
| 256236_at   | A13g12550 | hypothetical protein predicted by geneic r-box family protein                         | 244  | 359  | 381  | 427  | 463  | 359  | 328  | 416  | 0.79     | 0.164992  | 274  | 250  | 280  | 419  | 346  | 311  | 370  | 339  | 268  | 357  | 0.75     | 0.012009 | 359      | 0.75     | 0.051395 |          |
| 256237_at   | A13g12610 | leucine rich repeat protein, putative co DNA-damage-repair/tolerance protein, o       | 1441 | 1490 | 1670 | 2343 | 2504 | 1976 | 1534 | 2274 | 0.67     | 0.012357  | 1542 | 1719 | 1467 | 2477 | 2014 | 1898 | 2470 | 2368 | 1576 | 2245 | 0.70     | 0.077752 | 2310     | 0.74     | 0.049415 |          |
| 256238_at   | A13g12400 | unknown protein : supported by full-len tumour susceptibility gene 101 (TSG101        | 467  | 536  | 584  | 665  | 736  | 523  | 529  | 641  | 0.82     | 0.190235  | 422  | 414  | 408  | 545  | 465  | 411  | 441  | 443  | 415  | 461  | 0.90     | 0.178956 | 474      | 0.88     | 0.206870 |          |
| 256239_at   | A13g12470 | hypothetical protein predicted by gene expressed protein                              | 53   | 80   | 90   | 84   | 90   | 82   | 74   | 85   | 0.87     | 0.377285  | 51   | 64   | 70   | 70   | 50   | 54   | 59   | 65   | 61   | 60   | 1.03     | 0.793536 | 58       | 1.06     | 0.691656 |          |
| 256240_at   | A13g12600 | unknown protein : supported by cDNA, Multitoxin family protein                        | 267  | 355  | 332  | 378  | 400  | 348  | 318  | 375  | 0.85     | 0.131382  | 403  | 424  | 417  | 532  | 423  | 396  | 405  | 387  | 415  | 429  | 0.97     | 0.705263 | 450      | 0.92     | 0.442619 |          |
| 256241_at   | A13g12390 | nascent polypeptide associated complex nascent polypeptide associated complex         | 2411 | 1706 | 1581 | 1900 | 1945 | 1657 | 1569 | 1834 | 0.86     | 0.095543  | 1828 | 1761 | 1875 | 2517 | 2137 | 1930 | 1961 | 1961 | 1821 | 2101 | 0.87     | 0.109561 | 2194     | 0.83     | 0.100326 |          |
| 256242_at   | A13g12380 | actin-like protein contains Pfam profilin actin/actin-like family protein             | 121  | 265  | 259  | 292  | 350  | 274  | 245  | 306  | 0.80     | 0.101477  | 245  | 211  | 233  | 345  | 295  | 227  | 300  | 276  | 230  | 288  | 0.80     | 0.068880 | 289      | 0.80     | 0.172579 |          |
| 256243_at   | A13g12500 | basic chitinase identical to basic chitin; basic endochitinase                        | 13   | 15   | 22   | 22   | 25   | 25   | 17   | 24   | 0.70     | 0.071401  | 16   | 16   | 22   | 17   | 17   | 20   | 26   | 19   | 18   | 20   | 0.91     | 0.495805 | 18       | 0.99     | 0.945359 |          |
| 256244_at   | A13g12520 | sulfate transporter, putative similar to sulfate transporter family protein           | 138  | 128  | 105  | 226  | 134  | 162  | 123  | 174  | 0.71     | 0.156147  | 122  | 124  | 146  | 149  | 129  | 101  | 133  | 124  | 131  | 127  | 1.03     | 0.776282 | 126      | 1.03     | 0.802783 |          |
| 256245_at   | A13g12580 | heat shock protein 70 identical to heat : heat shock protein 70, putative / HSP70,    | 351  | 508  | 268  | 686  | 1670 | 782  | 376  | 1046 | 0.36     | 0.105114  | 275  | 228  | 373  | 267  | 194  | 150  | 444  | 380  | 292  | 287  | 1.02     | 0.950206 | 204      | 1.43     | 0.180602 |          |
| 256246_at   | A13g66558 | betaine aldehyde dehydrogenase, putative betaine-aldehyde dehydrogenase, putative     | 206  | 249  | 283  | 331  | 371  | 253  | 246  | 318  | 0.77     | 0.151776  | 216  | 178  | 210  | 304  | 271  | 233  | 275  | 249  | 201  | 266  | 0.76     | 0.012178 | 269      | 0.75     | 0.045734 |          |
| 256247_at   | A13g66556 | SRF-type transcription factor contains 1 MADS-box family protein                      | 26   | 26   | 41   | 36   | 37   | 31   | 31   | 35   | 0.89     | 0.506663  | 22   | 24   | 35   | 30   | 29   | 26   | 43   | 29   | 27   | 31   | 0.86     | 0.387983 | 28       | 0.95     | 0.706289 |          |
| 256248_at   | A13g66552 | unknown protein : supported by full-len expressed protein                             | 96   | 110  | 149  | 158  | 175  | 145  | 118  | 159  | 0.74     | 0.085173  | 49   | 52   | 66   | 76   | 66   | 53   | 59   | 54   | 56   | 62   | 0.90     | 0.415102 | 65       | 0.86     | 0.337779 |          |
| 256249_at   | A13g11920 | zNS proteasome regulatory subunit S1 26S proteasome non-ATPase regulatory             | 140  | 140  | 149  | 191  | 232  | 166  | 143  | 196  | 0.73     | 0.049942  | 126  | 106  | 130  | 196  | 175  | 147  | 148  | 154  | 121  | 164  | 0.74     | 0.019519 | 173      | 0.70     | 0.030874 |          |
| 256251_at   | A13g11330 | hypothetical protein predicted by gene leucine-rich repeat family protein             | 91   | 104  | 110  | 108  | 134  | 102  | 102  | 115  | 0.89     | 0.317981  | 94   | 102  | 112  | 135  | 108  | 90   | 137  | 115  | 103  | 117  | 0.88     | 0.283171 | 111      | 0.92     | 0.577011 |          |
| 256252_at   | A13g11340 | glucosyl transferase, putative similar to UDP-glucuronosylVUDP-glucosyl transfe       | 12   | 10   | 17   | 15   | 19   | 11   | 13   | 15   | 0.88     | 0.587949  | 14   | 14   | 12   | 14   | 15   | 14   | 13   | 14   | 15   | 14   | 0.92     | 0.952195 | 14       | 0.93     | 0.225993 |          |
| 256253_at   | A13g11250 | 60S acidic ribosomal protein, putative : 60S acidic ribosomal protein PO RPPPOC       | 144  | 103  | 107  | 124  | 1122 | 1017 | 1197 | 0.85 | 0.028451 | 923       | 1046 | 1167 | 1461 | 1137 | 1061 | 1113 | 1053 | 1158 | 1041 | 0.91 | 0.398655 | 125      | 0.87     | 0.312756 |          |          |
| 256254_at   | A13g11290 | hypothetical protein predicted by geneic expressed protein                            | 243  | 327  | 335  | 365  | 375  | 293  | 302  | 344  | 0.88     | 0.338929  | 297  | 301  | 306  | 458  | 367  | 298  | 384  | 379  | 301  | 377  | 0.80     | 0.067667 | 374      | 0.81     | 0.191632 |          |
| 256255_at   | A13g11280 | MYB-family transcription factor, putative myb family transcription factor             | 103  | 104  | 137  | 332  | 247  | 262  | 115  | 280  | 0.41     | 0.004258  | 234  | 251  | 257  | 526  | 396  | 362  | 444  | 400  | 247  | 433  | 0.57     | 0.002487 | 428      | 0.58     | 0.023589 |          |
| 256256_at   | A13g11230 | unknown protein : supported by full-len yippee family protein                         | 349  | 527  | 561  | 355  | 423  | 296  | 294  | 358  | 0.82     | 0.332934  | 322  | 287  | 319  | 412  | 368  | 358  | 313  | 276  | 309  | 345  | 0.89     | 0.309092 | 379      | 0.82     | 0.024461 |          |
| 256257_at   | A13g11240 | arginine-RNA-protein transferase, putative arginine-RNA-protein transferase, putative | 44   | 65   | 63   | 73   | 71   | 54   | 68   | 79   | 0.79     | 0.105853  | 43   | 44   | 49   | 61   | 53   | 40   | 58   | 54   | 45   | 55   | 0.82     | 0.516559 | 54       | 0.81     | 0.075697 |          |
| 256229_at   | A11g58200 | unknown protein                                                                       | 204  | 380  | 590  | 502  | 648  | 457  | 506  | 535  | 0.95     | 0.780607  | 319  | 268  | 329  | 366  | 375  | 320  | 448  | 371  | 305  | 376  | 0.81     | 0.069037 | 354      | 0.86     | 0.129551 |          |
| 256198_at   | A11g58220 | Mva-family transcription factor. putative myb family transcription factor             | 154  | 226  | 216  | 234  | 181  | 193  | 210  | 0.92 | 0.520780 | 167       | 142  | 148  | 206  | 163  | 144  | 189  | 179  | 153  | 176  | 0.87 | 0.171137 | 171      | 0.89     | 0.405194 |          |          |
| 256199_at   | A11g58250 | unknown protein                                                                       | 215  | 258  | 289  | 280  | 305  | 233  | 254  | 273  | 0.93     | 0.563110  | 173  | 160  | 196  | 230  | 207  | 153  | 211  | 221  | 176  | 204  | 0.86     | 0.205568 | 196      | 0.90     | 0.473014 |          |
| 256200_at   | A11g58210 | hypothetical protein predicted by geneic kinase interacting family protein            | 14   | 16   | 18   | 19   | 19   | 16   | 19   | 18   | 0.83     | 0.051426  | 10   | 12   | 11   | 13   | 13   | 12   | 12   | 12   | 11   | 13   | 0.84     | 0.081254 | 11       | 0.79     | 0.056423 |          |
| 256201_at   | A11g58200 | hypothetical protein predicted by geneic hypothetical protein /// WD-40 repeat fa     | 166  | 242  | 242  | 237  | 287  | 201  | 210  | 241  | 0.87     | 0.399619  | 185  | 152  | 182  | 227  | 218  | 177  | 212  | 206  | 184  | 207  | 0.84     | 0.057004 | 207      | 0.84     | 0.143325 |          |
| 256202_s_at | A11g57780 | hypothetical protein                                                                  | 24   | 36   | 40   | 35   | 36   | 35   | 34   | 35   | 0.94     | 0.703890  | 26   | 25   | 39   | 24   | 23   | 28   | 28   | 31   | 25   | 30   | 2.7      | 1.09     | 0.541869 | 27       | 1.12     | 0.556585 |
| 256203_at   | A11g50800 | hypothetical protein                                                                  | 9    | 14   | 13   | 11   | 13   | 15   | 12   | 13   | 0.93     | 0.0671245 | 10   | 8    | 11   | 9    | 10   | 7    | 13   | 8    | 10   | 9    | 1.04     | 0.826252 | 9        | 1.14     | 0.434819 |          |
| 256204_at   | A11g50840 | DNA polymerase A family protein, out: pol- like DNA polymerase, putative              | 258  | 372  | 353  | 440  | 464  | 371  | 328  | 425  | 0.77     | 0.095546  | 246  | 245  | 296  | 418  | 324  | 254  | 370  | 349  | 262  | 343  | 0.77     | 0.079470 | 332      | 0.79     | 0.240711 |          |
| 256205_at   | A11g50890 | hypothetical protein                                                                  | 57   | 72   | 82   | 67   | 82   | 57   | 62   | 82   | 0.67     | 0.0671245 | 54   | 60   | 68   | 75   | 60   | 64   | 62   | 84   | 61   | 69   | 0.82     | 0.044461 | 75       | 0.89     | 0.204659 |          |
| 256206_at   | A11g50910 | hypothetical protein predicted by geneic expressed protein                            | 47   | 57   | 52   | 64   | 65   | 50   | 52   | 60   | 0.87     | 0.231050  | 51   | 54   | 60   | 68   | 60   | 51   | 55   | 57   | 55   | 59   | 0.95     | 0.466636 | 60       | 0.92     | 0.439729 |          |
| 256207_at   | A11g50920 | G                                                                                     |      |      |      |      |      |      |      |      |          |           |      |      |      |      |      |      |      |      |      |      |          |          |          |          |          |          |

|           |           |                                                                                     |                                                             |      |      |      |      |      |      |      |      |          |          |      |      |      |      |      |      |      |      |      |      |          |          |          |          |          |          |
|-----------|-----------|-------------------------------------------------------------------------------------|-------------------------------------------------------------|------|------|------|------|------|------|------|------|----------|----------|------|------|------|------|------|------|------|------|------|------|----------|----------|----------|----------|----------|----------|
| 256190_at | At1g30100 | 9-cis-epoxycarotenoid dioxygenase, p1                                               | 9-cis-epoxycarotenoid dioxygenase, put                      | 17   | 15   | 20   | 19   | 21   | 20   | 17   | 20   | 0.86     | 0.097363 | 13   | 15   | 14   | 11   | 14   | 13   | 12   | 11   | 14   | 12   | 1.12     | 0.191552 | 13       | 1.08     | 0.422522 |          |
| 256191_at | At1g30130 | Expressed protein ; supported by full-length expressed protein                      |                                                             | 302  | 416  | 467  | 325  | 352  | 256  | 395  | 311  | 1.27     | 0.200936 | 574  | 618  | 511  | 678  | 553  | 534  | 649  | 564  | 548  | 596  | 0.95     | 0.551671 | 588      | 0.96     | 0.725723 |          |
| 256192_at | At1g30110 | diadenosine 5'-P1,P4-tetrahydroshosphate                                            | diadenosine 5'-P1,P4-tetrahydroshosphate                    | 73   | 104  | 78   | 117  | 103  | 85   | 85   | 101  | 0.84     | 0.288765 | 67   | 59   | 62   | 119  | 90   | 95   | 95   | 89   | 63   | 97   | 0.64     | 0.003285 | 101      | 0.62     | 0.013008 |          |
| 256193_at | At1g30200 | hydroxylase protein similar to hydroxylase F-box family pro                         | hydroxylase protein similar to hydroxylase F-box family pro | 241  | 320  | 376  | 356  | 369  | 323  | 315  | 355  | 0.89     | 0.141739 | 248  | 265  | 252  | 374  | 303  | 291  | 375  | 311  | 291  | 375  | 0.511587 | 324      | 0.78     | 0.053427 |          |          |
| 256195_at | At1g30135 | Expressed protein ; supported by full-length expressed protein                      |                                                             | 27   | 22   | 21   | 56   | 45   | 51   | 23   | 50   | 0.46     | 0.001542 | 10   | 15   | 14   | 28   | 26   | 24   | 34   | 30   | 13   | 28   | 0.46     | 0.000384 | 26       | 0.50     | 0.001608 |          |
| 256160_at | At1g30120 | pyruvate dehydrogenase E1 beta sub; pyruvate dehydrogenase E1 component             |                                                             | 684  | 758  | 747  | 1071 | 986  | 835  | 730  | 964  | 0.76     | 0.032193 | 808  | 848  | 1009 | 1506 | 1195 | 913  | 1200 | 1162 | 888  | 1195 | 0.74     | 0.060711 | 1205     | 0.74     | 0.156692 |          |
| 256161_at | At1g30090 | unknown protein ; supported by cDNA: ketch repeat-containing F-box family pro       |                                                             | 445  | 226  | 213  | 256  | 281  | 218  | 194  | 252  | 0.77     | 0.138655 | 179  | 180  | 165  | 263  | 211  | 186  | 225  | 217  | 175  | 221  | 0.79     | 0.035197 | 220      | 0.79     | 0.120059 |          |
| 256162_at | At1g50360 | hydroxylase protein similar to hydroxylase DC1 domain-containing protein            |                                                             | 27   | 35   | 40   | 36   | 42   | 37   | 35   | 40   | 0.86     | 0.001376 | 27   | 35   | 40   | 36   | 42   | 37   | 35   | 40   | 36   | 42   | 0.86     | 0.001376 | 30       | 0.86     | 0.001376 |          |
| 256163_at | At1g48820 | terpene cyclase, putative similar to terpene synthase/cyclase family protein        |                                                             | 16   | 17   | 22   | 20   | 24   | 13   | 18   | 19   | 0.95     | 0.796044 | 10   | 15   | 17   | 13   | 12   | 15   | 15   | 14   | 14   | 14   | 1.01     | 0.906514 | 14       | 1.04     | 0.803391 |          |
| 256164_at | At1g48800 | terpene cyclase, putative similar to terpene synthase/cyclase family protein        |                                                             | 16   | 11   | 15   | 14   | 17   | 15   | 14   | 15   | 0.89     | 0.379490 | 10   | 9    | 9    | 12   | 8    | 9    | 10   | 10   | 10   | 10   | 0.97     | 0.760412 | 10       | 1.00     | 0.971301 |          |
| 256165_at | At1g48780 | hydroxylase protein predicted by censer hydroxylase protein                         |                                                             | 74   | 92   | 83   | 103  | 100  | 78   | 83   | 94   | 0.89     | 0.328401 | 79   | 82   | 90   | 120  | 92   | 79   | 103  | 100  | 84   | 99   | 0.85     | 0.158752 | 97       | 0.87     | 0.354230 |          |
| 256135_at | At1g48730 | hydroxylase protein predicted by censer expressed protein                           |                                                             | 32   | 39   | 44   | 47   | 44   | 42   | 38   | 44   | 0.86     | 0.176010 | 32   | 36   | 40   | 39   | 31   | 29   | 31   | 36   | 36   | 33   | 1.08     | 0.146551 | 33       | 1.08     | 0.519657 |          |
| 256136_at | At1g48720 | lectin receptor kinase, putative similar :copia-like retrotransposon family         |                                                             | 9    | 9    | 0    | 0    | 0    | 3    | 1    | 2    | 0.99     | 0.491355 | 2    | 4    | 1    | 0    | 1    | 0    | 1    | 3    | 2    | 2    | 1.94     | 0.219271 | 1        | 2.24     | 0.312929 |          |
| 256137_at | At1g48690 | auxin-regulated protein, putative simila auxin-responsive GH3 family protein        |                                                             | 14   | 14   | 19   | 14   | 16   | 16   | 16   | 15   | 1.02     | 0.836597 | 15   | 15   | 15   | 14   | 10   | 14   | 18   | 13   | 15   | 14   | 1.07     | 0.541091 | 13       | 1.16     | 0.170363 |          |
| 256138_at | At1g48670 | Ni-h3 deduced protein, putative simila auxin-responsive GH3 family protein          |                                                             | 21   | 25   | 26   | 31   | 25   | 23   | 27   | 0.86 | 0.174202 | 20       | 21   | 19   | 19   | 18   | 21   | 18   | 20   | 20   | 19   | 14   | 1.04     | 0.412885 | 19       | 1.04     | 0.525655 |          |
| 256139_at | At1g48660 | Ni-h3 deduced protein, putative simila auxin-responsive GH3 family protein          |                                                             | 33   | 44   | 35   | 62   | 63   | 46   | 37   | 57   | 0.66     | 0.039583 | 29   | 26   | 36   | 30   | 29   | 33   | 32   | 23   | 30   | 29   | 1.03     | 0.752484 | 30       | 1.00     | 0.968991 |          |
| 256140_at | At1g48650 | quanine nucleotide-binding protein, ou quanine nucleotide-binding family protein    |                                                             | 159  | 216  | 251  | 224  | 250  | 190  | 209  | 225  | 0.53     | 0.645478 | 138  | 126  | 149  | 194  | 148  | 129  | 152  | 133  | 137  | 151  | 0.91     | 0.408419 | 157      | 0.87     | 0.381178 |          |
| 256141_at | At1g48640 | lvsaine and hidease specific transcorer oxonin-3 family protein /// lvsaine and his |                                                             | 24   | 36   | 40   | 49   | 39   | 41   | 34   | 43   | 0.78     | 0.183186 | 27   | 29   | 29   | 27   | 26   | 24   | 22   | 25   | 28   | 25   | 1.14     | 0.045353 | 26       | 1.10     | 0.132785 |          |
| 256142_at | At1g48790 | hydroxylase protein predicted by censer mv34 family protein                         |                                                             | 258  | 277  | 379  | 411  | 458  | 349  | 343  | 406  | 0.85     | 0.251144 | 288  | 266  | 322  | 408  | 352  | 306  | 373  | 382  | 285  | 364  | 0.78     | 0.023803 | 356      | 0.80     | 0.111351 |          |
| 256143_at | At1g48830 | 40S ribosomal protein S7 homolog, pu 40S ribosomal protein S7 (RPSTA)               |                                                             | 2058 | 2470 | 2501 | 2732 | 3030 | 2566 | 2343 | 2776 | 0.84     | 0.092684 | 2339 | 2511 | 2529 | 3111 | 2772 | 2393 | 2652 | 2632 | 2460 | 2712 | 0.91     | 0.171964 | 2759     | 0.89     | 0.239126 |          |
| 256144_at | At1g48630 | hydroxylase protein predicted by censer expressed protein                           |                                                             | 1531 | 1579 | 1899 | 2051 | 2225 | 1873 | 1669 | 2050 | 0.81     | 0.068514 | 1545 | 1612 | 1783 | 2255 | 1916 | 1768 | 1559 | 1611 | 1646 | 1822 | 0.90     | 0.354115 | 1980     | 0.93     | 0.106305 |          |
| 256145_at | At1g48750 | liof transfer protein, putative similar to delta-adaptin, putative                  |                                                             | 366  | 1859 | 421  | 1413 | 1146 | 813  | 882  | 1124 | 0.78     | 0.665515 | 446  | 485  | 472  | 1215 | 955  | 1004 | 976  | 862  | 468  | 1002 | 0.47     | 0.000484 | 1058     | 0.44     | 0.001852 |          |
| 256146_at | At1g48760 | delta-adaptin, putative similar to delta- delta-adaptin, putative                   |                                                             | 90   | 94   | 99   | 110  | 127  | 91   | 94   | 109  | 0.86     | 0.245646 | 94   | 66   | 94   | 114  | 107  | 78   | 108  | 110  | 85   | 104  | 0.82     | 0.136397 | 100      | 0.85     | 0.354145 |          |
| 256147_at | At1g55080 | hydroxylase protein predicted by censer expressed protein                           |                                                             | 140  | 177  | 171  | 171  | 203  | 151  | 163  | 175  | 0.93     | 0.555510 | 197  | 218  | 185  | 300  | 210  | 209  | 207  | 187  | 200  | 223  | 0.90     | 0.439514 | 239      | 0.84     | 0.280099 |          |
| 256148_at | At1g55090 | longevity assurance protein, outative s longevity-assurance (LAG1) family prote     |                                                             | 150  | 143  | 174  | 150  | 140  | 141  | 173  | 85   | 0.82     | 0.006916 | 141  | 127  | 165  | 251  | 193  | 179  | 169  | 140  | 144  | 188  | 0.77     | 0.132410 | 268      | 0.70     | 0.062669 |          |
| 256149_at | At1g55110 | zinc finger protein, putative similar to z zinc finger (C2H2 type) family protein   |                                                             | 466  | 735  | 766  | 700  | 733  | 613  | 656  | 682  | 0.96     | 0.011358 | 592  | 678  | 662  | 925  | 690  | 630  | 888  | 815  | 644  | 750  | 0.82     | 0.190702 | 748      | 0.86     | 0.326469 |          |
| 256150_at | At1g55120 | beta-fructofuranosidase identical to bet beta-fructosidase, putative / beta-fructof |                                                             | 338  | 411  | 424  | 479  | 539  | 436  | 391  | 485  | 0.81     | 0.079876 | 412  | 424  | 438  | 606  | 511  | 447  | 471  | 480  | 424  | 503  | 0.84     | 0.080773 | 521      | 0.81     | 0.107620 |          |
| 256151_at | At1g55130 | multispanning membrane protein, outa endomembrane protein 70, putative              |                                                             | 252  | 309  | 309  | 385  | 420  | 325  | 290  | 376  | 0.77     | 0.061741 | 266  | 241  | 293  | 399  | 314  | 286  | 376  | 334  | 267  | 344  | 0.78     | 0.043504 | 333      | 0.80     | 0.149875 |          |
| 256152_at | At1g55150 | ethylene-responsive RNA helicase, cu DEAD box RNA helicase, outative RH2            |                                                             | 393  | 399  | 539  | 530  | 544  | 511  | 444  | 528  | 0.84     | 0.158309 | 355  | 380  | 520  | 520  | 482  | 401  | 422  | 440  | 418  | 453  | 0.92     | 0.490558 | 468      | 0.89     | 0.474635 |          |
| 256153_at | At1g55092 | ubiquitin-like (UBQ12), outative similar polyubiquitin (UBQ12)                      |                                                             | 17   | 17   | 17   | 21   | 21   | 17   | 17   | 17   | 0.86     | 0.009116 | 12   | 12   | 12   | 12   | 12   | 12   | 12   | 12   | 12   | 12   | 0.99     | 0.931447 | 16       | 0.92     | 0.490505 |          |
| 256154_at | At3g08490 | unknown protein predicted by censer hydroxylase protein                             |                                                             | 18   | 42   | 49   | 64   | 61   | 50   | 52   | 56   | 0.92     | 0.586943 | 32   | 34   | 44   | 43   | 37   | 39   | 38   | 39   | 37   | 39   | 0.94     | 0.448205 | 40       | 0.93     | 0.506828 |          |
| 256155_at | At3g08500 | MYB-family transcription factor, putativ myb family transcription factor (MYB83)    |                                                             | 24   | 33   | 27   | 36   | 49   | 30   | 28   | 38   | 0.74     | 0.181464 | 29   | 26   | 18   | 66   | 26   | 40   | 39   | 40   | 24   | 42   | 0.58     | 0.091929 | 44       | 0.55     | 0.179730 |          |
| 256156_at | At3g08510 | phosphonitide specific phospholipase phosphonitide-specific phospholipase           |                                                             | 284  | 344  | 385  | 414  | 537  | 354  | 371  | 435  | 0.85     | 0.147973 | 377  | 385  | 411  | 468  | 416  | 406  | 471  | 465  | 391  | 449  | 0.87     | 0.042762 | 437      | 0.90     | 0.174780 |          |
| 256157_at | At1g15860 | longevity assurance protein, outative s longevity-assurance (LAG1) family prote     |                                                             | 129  | 150  | 143  | 174  | 150  | 140  | 141  | 173  | 0.82     | 0.006916 | 141  | 127  | 165  | 251  | 193  | 179  | 169  | 140  | 144  | 188  | 0.77     | 0.132410 | 268      | 0.70     | 0.062669 |          |
| 256158_at | At1g13590 | hydroxylase protein contains similarly I phytoalexins-related                       |                                                             | 32   | 31   | 29   | 31   | 28   | 29   | 31   | 29   | 1.04     | 0.338699 | 23   | 28   | 23   | 24   | 24   | 24   | 24   | 21   | 26   | 25   | 24       | 1.04     | 0.621254 | 24       | 1.03     | 0.673551 |
| 256131_at | At1g13600 | bZIP transcription factor, outative simil bZIP transcription factor family protein  |                                                             | 14   | 13   | 17   | 11   | 16   | 19   | 15   | 15   | 0.97     | 0.872337 | 12   | 8    | 9    | 15   | 14   | 14   | 15   | 13   | 10   | 14   | 0.71     | 0.006242 | 14       | 0.71     | 0.006242 |          |
| 256132_at | At1g13610 | hydroxylase protein similar to hydroxylase expressed protein                        |                                                             | 51   | 60   | 59   | 66   | 76   | 60   | 67   | 89   | 0.87     | 0.537346 | 37   | 38   | 49   | 34   | 36   | 35   | 46   | 38   | 41   | 38   | 1.10     | 0.400979 | 35       | 1.19     | 0.155582 |          |
| 256133_at | At1g13570 | hydroxylase protein predicted by censer expressed protein                           |                                                             | 229  | 316  | 306  | 324  | 397  | 294  | 300  | 346  | 0.87     | 0.071192 | 262  | 265  | 293  | 347  | 327  | 339  | 341  | 273  | 362  | 377  | 0.77     | 0.016205 | 367      | 0.75     | 0.043472 |          |
| 256134_at | At1g13560 | aminocatalohosphotransferase ident: aminocatalohosphotransferase (AAP1              |                                                             | 549  | 662  | 682  | 879  | 949  | 758  | 631  | 862  | 0.73     | 0.028998 | 578  | 632  | 690  | 1039 | 825  | 744  | 741  | 702  | 633  | 810  | 0.78     | 0.080254 | 869      | 0.73     | 0.065983 |          |
| 256103_at | At1g13540 | hydroxylase protein similar to hydroxylase hydroxylase protein similar to hvcoethic |                                                             | 7    | 6    | 13   | 12   | 11   | 12   | 9    | 11   | 0.75     | 0.251354 | 8    | 3    | 8    | 6    | 6    | 6    | 9    | 8    | 7    | 7    | 0.94     | 0.801454 | 6        | 1.12     | 0.692020 |          |
| 256104_at | At1g16980 | trehalase-6-phosphate synthase, outat alcho, alcho-trehalase-6-phosphate synth      |                                                             | 14   | 14   | 16   | 15   | 20   | 15   | 15   | 16   | 0.89     | 0.351514 | 14   | 14   | 17   | 12   | 12   | 13   | 15   | 15   | 13   | 15   | 0.97     | 0.789337 | 17       | 0.91     | 0.388141 |          |
| 256105_at | At1g16910 | hydroxylase protein predicted by censer hydroxylase protein                         |                                                             | 19   | 15   | 15   | 15   | 15   | 15   | 15   | 15   | 1.14     | 0.221528 | 14   | 14   | 17   | 12   | 12   | 13   | 15   | 13   | 15   | 14   | 0.85     | 0.487117 | 13       | 0.92     | 0.775618 |          |
| 256106_at | At1g16870 | unknown protein ; supported by cDNA: expressed protein                              |                                                             | 496  | 656  | 670  | 754  | 839  | 653  | 608  | 749  | 0.81     | 0.143200 | 564  | 515  | 591  | 706  | 652  | 566  | 607  | 581  | 581  | 641  | 0.87     | 0.197875 | 672      | 0.83     | 0.196823 |          |
| 256107_at | At1g16830 | hydroxylase protein predicted by censer pentatricopeptide (PPR) repeat-containi     |                                                             | 70   | 92   | 99   | 114  | 122  | 103  | 87   | 113  | 0.77     | 0.061217 | 78   | 79   | 95   | 104  | 96   | 86   | 98   | 92   | 84   | 94   | 0.89     | 0.117390 | 94       | 0.90     | 0.286050 |          |
| 256108_at | At1g16940 | hydroxylase protein predicted by censer F-box family protein                        |                                                             | 32   | 25   | 35   | 37   | 37   | 30   | 31   | 35   | 0.88     | 0.339171 | 21   | 19   | 25   | 25   | 24   | 19   | 20   | 22   | 22   | 22   | 0.98     | 0.832479 | 23       | 0.96     | 0.715099 |          |
| 256109_at | At1g16950 | hydroxylase protein predicted by censer expressed protein                           |                                                             | 14   | 13   | 48   | 17   | 17   | 25   | 17   | 146  | 0.529349 | 75       | 104  | 28   | 130  | 168  | 109  | 243  | 234  | 269  | 177  | 0.39 | 0.034325 | 135      | 0.51     | 0.078481 |          |          |
| 256110_at | At1g16930 | Ser Thr protein kinase, putative similar curculin-like (mannose-binding) lectin fa  |                                                             | 539  | 617  | 438  | 533  | 597  | 431  | 397  | 522  | 0.87     | 0.006909 | 431  | 397  | 522  | 431  |      |      |      |      |      |      |          |          |          |          |          |          |

|           |           |                                                                                         |      |      |      |      |      |      |      |      |          |          |          |      |      |      |      |      |      |      |      |          |          |          |          |          |          |
|-----------|-----------|-----------------------------------------------------------------------------------------|------|------|------|------|------|------|------|------|----------|----------|----------|------|------|------|------|------|------|------|------|----------|----------|----------|----------|----------|----------|
| 256068_at | At1g13690 | hypothetical protein contains similarly I RNA recognition motif (RRM)-containing        | 528  | 690  | 696  | 790  | 863  | 694  | 638  | 782  | 0.82     | 0.122000 | 676      | 736  | 701  | 987  | 839  | 801  | 796  | 744  | 704  | 834      | 0.85     | 0.062183 | 876      | 0.80     | 0.044621 |
| 256069_at | At1g13740 | hypothetical protein predicted by gene expression                                       | 175  | 249  | 313  | 300  | 327  | 259  | 245  | 295  | 0.83     | 0.326553 | 185      | 168  | 187  | 286  | 261  | 256  | 300  | 270  | 180  | 274      | 0.66     | 0.000196 | 267      | 0.67     | 0.001450 |
| 256070_at | At1g13730 | hypothetical protein predicted by gene nuclear transport factor 2 (NTF2) family         | 287  | 338  | 328  | 385  | 374  | 328  | 318  | 362  | 0.88     | 0.128206 | 278      | 255  | 321  | 444  | 341  | 307  | 335  | 324  | 284  | 350      | 0.81     | 0.112723 | 364      | 0.78     | 0.156390 |
| 256071_at | At1g07220 | ubiquitin-like protein similar to ubiquitin G domain and ubiquitin 3- and 4-kinase fam  | 151  | 241  | 194  | 231  | 165  | 219  | 199  | 110  | 0.631902 | 147      | 171      | 147  | 179  | 174  | 157  | 136  | 169  | 164  | 157  | 106      | 1.06     | 0.431199 | 174      | 1.05     | 0.105644 |
| 256040_at | At1g07270 | hypothetical protein similar to outative ( cell division control protein CDC6b, outa    | 50   | 50   | 65   | 62   | 60   | 60   | 55   | 61   | 0.90     | 0.297282 | 44       | 34   | 43   | 46   | 39   | 37   | 41   | 44   | 40   | 41       | 0.97     | 0.756476 | 41       | 0.99     | 0.918642 |
| 256041_at | At1g07230 | unknown protein phosphatase family                                                      | 243  | 320  | 372  | 351  | 444  | 323  | 312  | 373  | 0.84     | 0.308746 | 316      | 320  | 326  | 399  | 409  | 324  | 405  | 402  | 321  | 388      | 0.83     | 0.020086 | 378      | 0.85     | 0.102173 |
| 256042_at | At1g07220 | hypothetical protein predicted by gene expressed protein                                | 236  | 355  | 282  | 584  | 625  | 425  | 291  | 545  | 0.53     | 0.022309 | 239      | 233  | 244  | 546  | 410  | 423  | 365  | 321  | 239  | 413      | 0.58     | 0.013554 | 480      | 0.52     | 0.006974 |
| 256043_at | At1g07210 | hypothetical protein contains Plagulin S18 family                                       | 221  | 242  | 252  | 283  | 252  | 243  | 242  | 252  | 0.863536 | 237      | 205      | 213  | 237  | 258  | 235  | 252  | 268  | 252  | 258  | 288      | 0.88     | 0.299465 | 285      | 0.84     | 0.006116 |
| 256044_at | At1g07160 | protein chommatase 2C, outative simli protein chommatase 2C, outative / PP2X            | 34   | 38   | 48   | 48   | 51   | 46   | 40   | 48   | 0.83     | 0.123192 | 35       | 32   | 41   | 36   | 35   | 29   | 31   | 29   | 36   | 32       | 1.13     | 0.178311 | 33       | 1.09     | 0.429607 |
| 256045_at | At1g07150 | MAP3K alpha kinase, putative protein kinase family protein                              | 33   | 43   | 45   | 55   | 53   | 41   | 40   | 50   | 0.82     | 0.174974 | 19       | 22   | 21   | 31   | 23   | 24   | 26   | 21   | 26   | 21       | 0.78     | 0.026583 | 26       | 0.79     | 0.099227 |
| 256046_at | At1g07135 | unknown protein glycine-rich protein                                                    | 1133 | 1080 | 1388 | 1347 | 1827 | 1127 | 1200 | 1434 | 0.84     | 0.362865 | 461      | 547  | 386  | 472  | 433  | 429  | 623  | 561  | 465  | 504      | 0.92     | 0.551683 | 444      | 1.05     | 0.693433 |
| 256047_at | At1g07060 | hypothetical protein predicted by gene expressed protein                                | 45   | 49   | 66   | 67   | 62   | 68   | 53   | 65   | 0.82     | 0.138071 | 44       | 47   | 55   | 48   | 47   | 49   | 55   | 48   | 48   | 48       | 1.01     | 0.880641 | 45       | 1.08     | 0.452945 |
| 256048_at | At1g07025 | hypothetical protein contains similarly I mitochondrial substrate carrier family pr     | 28   | 35   | 41   | 44   | 41   | 43   | 34   | 43   | 0.81     | 0.102123 | 28       | 44   | 42   | 30   | 28   | 33   | 38   | 30   | 1.24 | 0.114341 | 30       | 1.25     | 0.227727 |          |          |
| 256049_at | At1g07010 | unknown protein calcineurin-like phosphatase family                                     | 99   | 154  | 156  | 167  | 178  | 149  | 136  | 165  | 0.83     | 0.238502 | 122      | 116  | 141  | 225  | 169  | 138  | 140  | 149  | 126  | 164      | 0.77     | 0.138578 | 177      | 0.71     | 0.126808 |
| 256050_at | At1g07000 | leucine zipper protein, putative similar exocyt subunit EXO70 family protein            | 72   | 82   | 107  | 106  | 118  | 96   | 87   | 107  | 0.81     | 0.171735 | 61       | 67   | 58   | 74   | 61   | 53   | 76   | 72   | 62   | 67       | 0.92     | 0.407543 | 63       | 0.98     | 0.877036 |
| 256051_at | At1g06970 | hypothetical protein similar to outative I cation/hydrogen exchanger, outative (C)      | 31   | 42   | 59   | 33   | 39   | 37   | 44   | 36   | 1.20     | 0.437401 | 20       | 21   | 30   | 29   | 21   | 27   | 28   | 38   | 24   | 29       | 0.84     | 0.323629 | 26       | 0.93     | 0.696422 |
| 256052_at | At1g06960 | scilicoseomal protein (UEB), outative si small nuclear ribonucleoprotein UEB, ou        | 460  | 443  | 441  | 517  | 400  | 424  | 453  | 0.94 | 0.553756 | 417      | 464      | 448  | 642  | 500  | 444  | 469  | 468  | 443  | 509  | 0.87     | 0.212320 | 529      | 0.84     | 0.227218 |          |
| 256053_at | At1g07260 | UDP-glucose glucosyltransferase, outa UDP-glucuronosyl(UDP-glucosyl) transfe            | 37   | 40   | 44   | 53   | 70   | 55   | 40   | 59   | 0.68     | 0.028510 | 23       | 31   | 27   | 39   | 32   | 31   | 36   | 33   | 27   | 34       | 0.79     | 0.033727 | 34       | 0.80     | 0.112359 |
| 256054_at | At1g07120 | unknown protein expressed protein                                                       | 29   | 34   | 41   | 58   | 64   | 51   | 35   | 58   | 0.60     | 0.012173 | 36       | 40   | 42   | 59   | 55   | 48   | 43   | 42   | 39   | 50       | 0.79     | 0.063862 | 54       | 0.72     | 0.013729 |
| 256055_at | At1g07030 | mitochondrial carrier protein, putative I mitochondrial substrate carrier family pr     | 48   | 67   | 61   | 78   | 78   | 62   | 59   | 73   | 0.81     | 0.144860 | 67       | 84   | 80   | 113  | 78   | 79   | 95   | 87   | 77   | 91       | 0.85     | 0.190971 | 90       | 0.85     | 0.355672 |
| 256056_at | At1g07190 | hypothetical protein contains similarly I hypothetical protein                          | 9    | 9    | 10   | 12   | 11   | 9    | 11   | 0.84 | 0.003056 | 9        | 6        | 9    | 7    | 6    | 7    | 9    | 7    | 9    | 7    | 7        | 1.10     | 0.449943 | 7        | 1.17     | 0.296913 |
| 256057_at | At1g07180 | unknown protein contains similarly to a pyridine nucleotide-disulphide oxidoredu        | 150  | 157  | 167  | 101  | 87   | 79   | 158  | 89   | 1.78     | 0.001031 | 176      | 150  | 211  | 160  | 106  | 103  | 116  | 113  | 179  | 120      | 1.50     | 0.020203 | 123      | 1.45     | 0.094614 |
| 256058_at | At1g07240 | UDP-glucose glucosyltransferase, outa UDP-glucuronosyl(UDP-glucosyl) transfe            | 58   | 80   | 65   | 71   | 85   | 63   | 68   | 73   | 0.93     | 0.604762 | 60       | 72   | 57   | 64   | 53   | 74   | 65   | 63   | 62   | 71       | 0.81     | 0.884371 | 57       | 1.10     | 0.369278 |
| 256059_at | At1g06990 | hypothetical protein contains similarly I GDSL-like lipase/hydrolase family prot        | 13   | 16   | 18   | 14   | 18   | 20   | 15   | 14   | 18       | 0.81     | 0.098830 | 10   | 20   | 13   | 17   | 14   | 14   | 13   | 14   | 15       | 0.98     | 0.915860 | 15       | 0.94     | 0.788227 |
| 256060_at | At1g07050 | hypothetical protein contains similarly I CONSTANS-like protein-related                 | 13   | 20   | 26   | 17   | 19   | 35   | 20   | 27   | 0.74     | 0.335631 | 17       | 19   | 17   | 14   | 15   | 24   | 21   | 17   | 18   | 18       | 0.98     | 0.866272 | 16       | 1.00     | 0.989209 |
| 256061_at | At1g07040 | unknown protein supported by full-length expressed protein                              | 281  | 433  | 508  | 363  | 449  | 334  | 401  | 382  | 1.05     | 0.029620 | 343      | 441  | 309  | 540  | 489  | 433  | 603  | 574  | 385  | 528      | 0.69     | 0.016903 | 487      | 0.75     | 0.070969 |
| 256062_at | At1g07090 | unknown protein supported by full-length expressed protein                              | 65   | 76   | 89   | 112  | 113  | 109  | 77   | 111  | 0.66     | 0.008154 | 166      | 187  | 201  | 235  | 187  | 155  | 195  | 192  | 184  | 193      | 0.96     | 0.667341 | 193      | 0.96     | 0.785223 |
| 256063_at | At1g07130 | Expressed protein : supported by full-le OB-fold nucleic acid binding domain-cor        | 46   | 56   | 56   | 68   | 66   | 55   | 53   | 63   | 0.84     | 0.129856 | 54       | 57   | 55   | 66   | 59   | 53   | 62   | 54   | 55   | 59       | 0.94     | 0.339477 | 59       | 0.93     | 0.375553 |
| 256064_at | At1g07020 | Expressed protein : supported by full-le expressed protein                              | 262  | 324  | 324  | 340  | 381  | 338  | 303  | 353  | 0.86     | 0.117610 | 324      | 336  | 322  | 463  | 371  | 355  | 365  | 345  | 328  | 384      | 0.85     | 0.145062 | 403      | 0.81     | 0.134153 |
| 256065_at | At1g07030 | hypothetical protein similar to ribosomal protein L35a (RPL35a) protein                 | 385  | 435  | 433  | 429  | 386  | 435  | 433  | 429  | 0.83     | 0.026277 | 445      | 448  | 445  | 550  | 445  | 445  | 445  | 445  | 445  | 445      | 0.88     | 0.738951 | 450      | 0.82     | 0.098503 |
| 256066_at | At1g06980 | hypothetical protein similar to hypothet: expressed protein                             | 39   | 48   | 59   | 48   | 59   | 52   | 49   | 53   | 0.92     | 0.557858 | 25       | 34   | 29   | 39   | 30   | 29   | 33   | 38   | 29   | 34       | 0.87     | 0.247786 | 32       | 0.91     | 0.496947 |
| 256067_at | At1g07170 | unknown protein supported by full-length expressed protein                              | 644  | 884  | 993  | 832  | 983  | 759  | 840  | 858  | 0.98     | 0.809050 | 698      | 835  | 863  | 1150 | 931  | 907  | 940  | 927  | 798  | 971      | 0.82     | 0.050864 | 996      | 0.80     | 0.100211 |
| 256033_at | At1g07250 | UDP-glucose glucosyltransferase, outa UDP-glucuronosyl(UDP-glucosyl) transfe            | 302  | 320  | 398  | 420  | 407  | 378  | 340  | 402  | 0.85     | 0.128738 | 275      | 237  | 277  | 401  | 322  | 279  | 367  | 346  | 263  | 343      | 0.77     | 0.033504 | 304      | 0.79     | 0.136905 |
| 256034_at | At1g07080 | unknown protein supported by cDNA, alpha interferon responsive kinase                   | 555  | 705  | 627  | 856  | 995  | 746  | 696  | 869  | 0.80     | 0.196369 | 639      | 1084 | 1086 | 1316 | 1086 | 1073 | 1023 | 1042 | 1040 | 1108     | 0.94     | 0.431635 | 1158     | 0.90     | 0.273707 |
| 256035_at | At1g07140 | Ran-binding protein (atranb)1a) identic Ran-binding protein 1a (RanBP1a)                | 461  | 575  | 571  | 681  | 747  | 656  | 536  | 695  | 0.77     | 0.026354 | 579      | 620  | 590  | 845  | 633  | 629  | 497  | 526  | 597  | 626      | 0.95     | 0.723205 | 702      | 0.85     | 0.217829 |
| 256036_at | At1g07110 | fructose-2,6-bisphosphatase, outative fructose-6-phosphate 2-kinase / fructose          | 206  | 316  | 287  | 240  | 299  | 220  | 270  | 253  | 1.07     | 0.700227 | 201      | 181  | 200  | 229  | 206  | 174  | 215  | 199  | 194  | 204      | 0.95     | 0.467417 | 203      | 0.96     | 0.641701 |
| 256037_at | At1g19160 | hypothetical protein predicted by gene-F family protein-related                         | 28   | 35   | 44   | 43   | 43   | 40   | 36   | 42   | 0.85     | 0.273597 | 26       | 25   | 31   | 30   | 23   | 28   | 33   | 25   | 27   | 28       | 0.98     | 0.875294 | 27       | 1.02     | 0.886804 |
| 256038_at | At1g19170 | hypothetical protein similar to polyovale glycolic acid hydrolase family 28 protein / p | 220  | 300  | 284  | 341  | 363  | 336  | 289  | 347  | 0.77     | 0.038630 | 256      | 325  | 279  | 353  | 310  | 272  | 316  | 309  | 257  | 316      | 0.81     | 0.026825 | 312      | 0.82     | 0.098465 |
| 256039_at | At1g19190 | hypothetical protein contains similarly I expressed protein                             | 43   | 57   | 89   | 63   | 65   | 63   | 62   | 102  | 0.936779 | 27       | 30       | 33   | 36   | 24   | 28   | 35   | 37   | 30   | 32   | 0.94     | 0.613665 | 29       | 1.02     | 0.888558 |          |
| 256009_at | At1g19210 | AP2 domain transcription factor, putati AP2 domain-containing transcription fac         | 73   | 63   | 76   | 142  | 158  | 93   | 71   | 131  | 0.54     | 0.039848 | 30       | 26   | 32   | 38   | 40   | 39   | 47   | 44   | 29   | 42       | 0.70     | 0.026269 | 39       | 0.74     | 0.004384 |
| 256010_at | At1g19220 | auxin response factor, outative similar transcriptional factor B3 family protein / i    | 54   | 74   | 64   | 74   | 87   | 60   | 64   | 74   | 0.87     | 0.374498 | 40       | 41   | 46   | 62   | 52   | 46   | 45   | 47   | 43   | 50       | 0.84     | 0.120694 | 53       | 0.80     | 0.093780 |
| 256011_at | At1g19230 | respiratory burst oxidase protein, outat respiratory burst oxidase protein E (Rbo       | 33   | 35   | 33   | 28   | 25   | 32   | 34   | 28   | 1.19     | 0.060225 | 27       | 27   | 28   | 33   | 26   | 27   | 42   | 35   | 29   | 31       | 0.96     | 0.977285 | 25       | 1.15     | 0.146498 |
| 256012_at | At1g19250 | unknown protein similar to dimethylsulfoxide transferase family                         | 19   | 18   | 17   | 20   | 25   | 23   | 18   | 17   | 0.72     | 0.008227 | 14       | 13   | 16   | 17   | 16   | 16   | 18   | 14   | 17   | 16       | 0.99     | 0.187877 | 16       | 1.00     | 0.984802 |
| 256013_at | At1g19270 | unknown protein ubiquitin interaction motif-containing pro                              | 109  | 141  | 158  | 133  | 185  | 153  | 136  | 157  | 0.87     | 0.398327 | 137      | 136  | 136  | 184  | 157  | 124  | 199  | 144  | 136  | 162      | 0.84     | 0.203048 | 155      | 0.88     | 0.332708 |
| 256014_at | At1g19200 | hypothetical protein predicted by gene: sequence-associated protein-related             | 51   | 56   | 64   | 68   | 69   | 61   | 57   | 66   | 0.86     | 0.098711 | 49       | 53   | 51   | 53   | 60   | 46   | 60   | 62   | 51   | 56       | 0.91     | 0.284222 | 53       | 0.97     | 0.772582 |
| 256015_at | At1g19150 | P51 type II chlorophyll a-b-binding core chlorophyll A-B binding protein, outative      | 50   | 108  | 80   | 91   | 91   | 72   | 79   | 85   | 0.94     | 0.778753 | 73       | 88   | 80   | 91   | 69   | 70   | 86   | 79   | 80   | 79       | 1.02     | 0.826782 | 77       | 1.05     | 0.681464 |
| 256016_at | At1g19240 | hypothetical protein predicted by gene: expressed protein                               | 265  | 385  | 405  | 449  | 382  | 338  | 412  | 0.81 | 0.155068 | 320      | 359      | 359  | 343  | 393  | 371  | 451  | 408  | 346  | 431  | 0.80     | 0.073320 | 432      | 0.80     | 0.174775 |          |
| 256017_at | At1g19180 | unknown protein supported by full-length expressed protein                              | 495  | 348  | 453  | 857  | 954  | 809  | 432  | 873  | 0.49     | 0.001926 | 724      | 727  | 725  | 1057 | 1151 | 934  | 1405 | 1408 | 725  | 1191     | 0.61     | 0.010128 | 1047     |          |          |

|           |          |                                                                                         |      |      |      |      |      |      |      |      |      |          |      |      |      |      |      |      |      |      |      |      |          |          |      |          |          |
|-----------|----------|-----------------------------------------------------------------------------------------|------|------|------|------|------|------|------|------|------|----------|------|------|------|------|------|------|------|------|------|------|----------|----------|------|----------|----------|
| 256973_at | A1g32400 | hypothetical protein predicted by gene: formic homology 2 domain-containing pr          | 99   | 126  | 131  | 137  | 164  | 126  | 119  | 142  | 0.83 | 0.192875 | 116  | 92   | 131  | 152  | 125  | 133  | 133  | 137  | 113  | 136  | 0.83     | 0.063990 | 137  | 0.83     | 0.160434 |
| 256974_at | A1g31023 | hypothetical protein                                                                    | 21   | 21   | 23   | 24   | 23   | 26   | 22   | 24   | 0.89 | 0.083552 | 15   | 16   | 17   | 21   | 14   | 17   | 15   | 15   | 16   | 16   | 0.97     | 0.756754 | 17   | 0.92     | 0.550789 |
| 256975_at | A1g32350 | hypothetical protein                                                                    | 27   | 27   | 28   | 30   | 26   | 34   | 27   | 30   | 0.91 | 0.294077 | 24   | 27   | 30   | 26   | 24   | 23   | 26   | 24   | 27   | 25   | 1.10     | 0.150516 | 24   | 1.11     | 0.233841 |
| 256976_at | A1g22010 | hypothetical protein predicted by gene: hypothetical protein                            | 24   | 24   | 31   | 31   | 30   | 28   | 31   | 33   | 0.91 | 0.349102 | 23   | 31   | 34   | 26   | 21   | 31   | 25   | 21   | 31   | 26   | 0.93     | 0.540965 | 25   | 0.93     | 0.870575 |
| 256946_at | A1g22020 | ovine hydroxymethyltransferase, puta                                                    | 105  | 151  | 142  | 144  | 172  | 124  | 133  | 146  | 0.91 | 0.525820 | 109  | 95   | 126  | 151  | 137  | 121  | 124  | 123  | 110  | 131  | 0.84     | 0.078223 | 137  | 0.81     | 0.103577 |
| 256947_at | A1g22040 | hypothetical protein contains Pfam prof kelp repeat-containing F-box family pro         | 79   | 109  | 115  | 128  | 144  | 107  | 101  | 126  | 0.80 | 0.179400 | 77   | 77   | 87   | 113  | 100  | 95   | 106  | 91   | 80   | 103  | 0.78     | 0.030087 | 103  | 0.78     | 0.024163 |
| 256948_at | A1g22060 | hypothetical protein predicted by gene: kelp repeat-containing F-box family pro         | 224  | 279  | 249  | 356  | 384  | 270  | 251  | 337  | 0.74 | 0.084027 | 230  | 186  | 276  | 321  | 275  | 217  | 221  | 216  | 231  | 250  | 0.92     | 0.586726 | 271  | 0.85     | 0.364645 |
| 256949_at | A1g22080 | hypothetical protein predicted by gene: hypothetical protein                            | 25   | 32   | 33   | 34   | 28   | 33   | 31   | 33   | 0.90 | 0.261133 | 26   | 33   | 31   | 36   | 34   | 35   | 31   | 31   | 31   | 34   | 0.83     | 0.623171 | 31   | 0.81     | 0.874158 |
| 256950_at | A1g22110 | hypothetical protein predicted by gene: ubiquitin protein                               | 35   | 36   | 53   | 53   | 52   | 38   | 41   | 48   | 0.85 | 0.425669 | 57   | 54   | 40   | 49   | 68   | 50   | 51   | 55   | 53   | 55   | 0.98     | 0.830999 | 56   | 0.96     | 0.760352 |
| 256951_at | A1g22050 | unknown protein contains similarity to u. ubiquitin family protein                      | 43   | 56   | 67   | 72   | 75   | 59   | 55   | 69   | 0.80 | 0.188320 | 53   | 51   | 58   | 94   | 77   | 73   | 68   | 63   | 54   | 75   | 0.72     | 0.028484 | 82   | 0.66     | 0.015666 |
| 256952_at | A1g22130 | MADS-box protein (ZP1.1), putative sir MADS-box family protein                          | 14   | 18   | 23   | 20   | 21   | 21   | 18   | 21   | 0.89 | 0.417726 | 17   | 15   | 19   | 14   | 16   | 15   | 16   | 25   | 17   | 17   | 0.99     | 0.947371 | 15   | 1.16     | 0.140736 |
| 256953_at | A1g22070 | transcription factor identical to transcribed ZIPF family transcription factor (TGAS)   | 98   | 131  | 145  | 154  | 173  | 123  | 125  | 150  | 0.81 | 0.347916 | 153  | 157  | 132  | 180  | 158  | 151  | 198  | 183  | 147  | 174  | 0.85     | 0.085028 | 163  | 0.90     | 0.258453 |
| 256954_at | A1g22090 | hypothetical protein predicted by gene: expressed protein                               | 39   | 40   | 51   | 33   | 34   | 32   | 43   | 33   | 1.29 | 0.068029 | 47   | 40   | 49   | 32   | 28   | 29   | 25   | 45   | 28   | 28   | 1.81     | 0.003417 | 29   | 1.58     | 0.005734 |
| 256955_at | A1g22030 | hypothetical protein predicted by gene: expressed protein                               | 51   | 70   | 66   | 63   | 79   | 65   | 62   | 69   | 0.90 | 0.430441 | 53   | 55   | 64   | 58   | 49   | 51   | 56   | 51   | 57   | 53   | 1.09     | 0.230419 | 52   | 1.09     | 0.323325 |
| 256956_at | A1g22015 | Expressed protein ; supported by full-length galactosyltransferase family protein       | 118  | 159  | 197  | 44   | 44   | 42   | 158  | 43   | 3.65 | 0.007113 | 270  | 278  | 274  | 33   | 30   | 34   | 44   | 31   | 274  | 34   | 8.00     | 0.000000 | 32   | 8.55     | 0.000000 |
| 256957_at | A1g22160 | hypothetical protein - supported by full-length sense-associated protein-related        | 205  | 413  | 363  | 320  | 344  | 273  | 327  | 312  | 1.05 | 0.835808 | 308  | 384  | 352  | 554  | 408  | 399  | 331  | 302  | 348  | 399  | 0.87     | 0.429704 | 454  | 0.77     | 0.125085 |
| 256958_at | A1g22150 | high affinity sulfate transporter, outat sulfate transporter (Sultr1.3)                 | 13   | 16   | 23   | 19   | 22   | 19   | 17   | 20   | 0.89 | 0.520923 | 13   | 20   | 18   | 14   | 14   | 17   | 15   | 14   | 17   | 15   | 1.16     | 0.211555 | 15   | 1.14     | 0.410368 |
| 256959_at | A1g21980 | ochsotatdivinisolat-4-ohosate 5-kin 1-ohosotatdivinisolat-4-ohosate 5-kin               | 94   | 126  | 149  | 134  | 158  | 138  | 123  | 143  | 0.86 | 0.322949 | 188  | 175  | 183  | 248  | 217  | 184  | 186  | 181  | 182  | 203  | 0.89     | 0.270742 | 217  | 0.84     | 0.143975 |
| 256960_at | A1g22140 | unknown protein ; supported by cDNA: expressed protein                                  | 435  | 539  | 521  | 581  | 590  | 509  | 498  | 560  | 0.89 | 0.208622 | 544  | 617  | 599  | 893  | 646  | 623  | 677  | 656  | 586  | 699  | 0.84     | 0.146647 | 720  | 0.81     | 0.206725 |
| 256961_at | A1g22340 | UDP-glucose glucosyltransferase, puta UDP-glucosonylUDP-glucosyl transfe                | 80   | 71   | 88   | 86   | 99   | 80   | 73   | 88   | 0.83 | 0.205419 | 41   | 34   | 51   | 46   | 44   | 41   | 50   | 45   | 42   | 45   | 0.93     | 0.459366 | 44   | 0.96     | 0.739002 |
| 256962_at | A1g22335 | ovine rich RNA-binding protein, puta expressed protein                                  | 89   | 80   | 84   | 62   | 67   | 59   | 84   | 63   | 1.35 | 0.001916 | 112  | 128  | 111  | 132  | 87   | 74   | 137  | 131  | 117  | 112  | 0.04     | 0.797908 | 97   | 1.20     | 0.346054 |
| 256963_at | A1g22310 | unknown protein                                                                         | 109  | 156  | 141  | 144  | 165  | 126  | 135  | 145  | 0.93 | 0.618755 | 105  | 99   | 116  | 134  | 104  | 106  | 119  | 120  | 107  | 116  | 0.92     | 0.271417 | 115  | 0.93     | 0.507185 |
| 256964_at | A1g22275 | hypothetical protein predicted by gene: expressed protein                               | 40   | 60   | 55   | 55   | 70   | 48   | 51   | 57   | 0.89 | 0.534017 | 32   | 26   | 31   | 35   | 32   | 28   | 24   | 30   | 29   | 1.03 | 0.759305 | 31       | 0.94 | 0.525566 |          |
| 256965_at | A1g22290 | 14-3-3 protein (GR14), putative similar : 14-3-3 protein GF14, putative (GRF10)         | 60   | 77   | 74   | 98   | 111  | 86   | 70   | 98   | 0.72 | 0.032468 | 56   | 66   | 65   | 84   | 58   | 65   | 61   | 59   | 62   | 65   | 0.95     | 0.633936 | 69   | 0.90     | 0.451214 |
| 256966_at | A1g22300 | 14-3-3 protein GF14epson (GR10) ide 14-3-3 protein GF14 epsilon (GRF10)                 | 1853 | 1975 | 1935 | 2330 | 2390 | 1993 | 1798 | 2238 | 0.50 | 0.055633 | 1723 | 1876 | 1907 | 2725 | 2166 | 1994 | 1981 | 1878 | 1636 | 2147 | 0.86     | 0.181389 | 2282 | 0.80     | 0.118808 |
| 256967_at | A1g22280 | protein phosphatase type 2C, putative                                                   | 439  | 549  | 528  | 545  | 594  | 450  | 505  | 530  | 0.95 | 0.675240 | 547  | 531  | 472  | 725  | 540  | 554  | 594  | 575  | 517  | 597  | 0.86     | 0.136895 | 606  | 0.85     | 0.230826 |
| 256968_at | A1g22270 | Expressed protein ; supported by full-length expressed protein                          | 319  | 358  | 419  | 385  | 403  | 383  | 366  | 395  | 0.93 | 0.380227 | 420  | 573  | 494  | 634  | 509  | 489  | 432  | 427  | 495  | 498  | 0.99     | 0.964473 | 544  | 0.91     | 0.485314 |
| 256969_at | A1g22330 | Expressed protein ; supported by full-length RNA recognition motif (RRM)-containin      | 99   | 97   | 103  | 78   | 91   | 67   | 99   | 78   | 1.27 | 0.042301 | 132  | 166  | 110  | 156  | 94   | 108  | 127  | 119  | 136  | 121  | 1.13     | 0.424307 | 120  | 1.14     | 0.537468 |
| 256942_at | A1g22360 | UDP-glucose glucosyltransferase ident. UDP-glucosonylUDP-glucosyl transfe               | 101  | 107  | 163  | 119  | 134  | 153  | 124  | 135  | 0.92 | 0.639794 | 54   | 45   | 55   | 67   | 41   | 55   | 87   | 85   | 51   | 67   | 0.77     | 0.234099 | 54   | 0.95     | 0.725100 |
| 256943_at | A1g22370 | UDP-glucose glucosyltransferase, puta UDP-glucosonylUDP-glucosyl transfe                | 41   | 47   | 52   | 60   | 41   | 47   | 52   | 60   | 0.88 | 0.357722 | 48   | 47   | 50   | 45   | 45   | 42   | 45   | 40   | 45   | 42   | 0.84     | 0.613981 | 40   | 1.01     | 0.947307 |
| 256944_at | A1g22860 | putative protein                                                                        | 31   | 39   | 42   | 38   | 41   | 38   | 37   | 39   | 0.97 | 0.715500 | 33   | 34   | 34   | 33   | 33   | 33   | 33   | 39   | 41   | 34   | 0.96     | 0.390857 | 33   | 1.02     | 0.162926 |
| 256945_at | A1g28610 | putative protein                                                                        | 21   | 18   | 21   | 17   | 15   | 18   | 20   | 17   | 1.18 | 0.089595 | 15   | 15   | 15   | 13   | 16   | 12   | 15   | 15   | 15   | 14   | 1.05     | 0.508851 | 13   | 1.11     | 0.267945 |
| 256915_at | A1g28620 | putative protein                                                                        | 12   | 9    | 13   | 11   | 14   | 13   | 11   | 12   | 0.92 | 0.558886 | 10   | 10   | 9    | 10   | 9    | 8    | 11   | 8    | 10   | 9    | 1.04     | 0.895880 | 9    | 1.05     | 0.429559 |
| 256916_at | A1g28560 | putative protein                                                                        | 29   | 29   | 30   | 31   | 32   | 31   | 31   | 31   | 0.88 | 0.738697 | 25   | 20   | 27   | 23   | 19   | 20   | 20   | 20   | 24   | 22   | 1.10     | 0.340987 | 21   | 1.14     | 0.240269 |
| 256917_at | A1g28560 | putative protein                                                                        | 36   | 24   | 48   | 42   | 40   | 46   | 36   | 43   | 0.84 | 0.402456 | 23   | 23   | 29   | 26   | 23   | 20   | 30   | 30   | 25   | 26   | 0.96     | 0.758612 | 23   | 1.08     | 0.481004 |
| 256918_at | A1g28570 | putative protein                                                                        | 20   | 23   | 29   | 29   | 27   | 35   | 24   | 30   | 0.79 | 0.154938 | 21   | 22   | 27   | 27   | 27   | 19   | 29   | 20   | 24   | 23   | 1.04     | 0.775706 | 21   | 1.11     | 0.562003 |
| 256919_at | A1g28580 | putative protein                                                                        | 62   | 65   | 103  | 96   | 88   | 98   | 77   | 94   | 0.82 | 0.278777 | 48   | 81   | 62   | 71   | 51   | 50   | 84   | 78   | 64   | 67   | 0.96     | 0.805925 | 57   | 1.11     | 0.610894 |
| 256920_at | A1g28590 | putative protein                                                                        | 53   | 61   | 74   | 58   | 68   | 64   | 63   | 63   | 0.99 | 0.061914 | 47   | 51   | 58   | 49   | 43   | 40   | 64   | 57   | 52   | 53   | 0.93     | 0.939249 | 40   | 1.01     | 0.280737 |
| 256921_at | A1g22240 | hypothetical protein contains Pfam prof pumilio/Puf RNA-binding domain-contain          | 147  | 128  | 175  | 104  | 117  | 85   | 150  | 102  | 147  | 0.043704 | 161  | 159  | 165  | 127  | 138  | 102  | 152  | 143  | 162  | 132  | 1.22     | 0.044453 | 122  | 1.32     | 0.022505 |
| 256922_at | A1g22210 | trehalose-6-phosphate phosphatase, c trehalase-6-phosphate phosphatase, ou              | 17   | 16   | 17   | 13   | 15   | 15   | 17   | 14   | 1.15 | 0.062965 | 18   | 19   | 23   | 12   | 12   | 10   | 17   | 9    | 20   | 12   | 1.65     | 0.013172 | 11   | 1.76     | 0.013133 |
| 256923_at | A1g22180 | hypothetical protein contains Pfam prof SEC14 cytosolic factor family protein /         | 19   | 21   | 31   | 17   | 17   | 15   | 24   | 17   | 1.45 | 0.127812 | 16   | 23   | 20   | 26   | 19   | 21   | 27   | 22   | 20   | 23   | 0.86     | 0.257967 | 22   | 0.89     | 0.473254 |
| 256924_at | A1g22170 | hypothetical protein contains similarity to c ochsotatdivinisolatdivinisolatdivinisolat | 110  | 127  | 174  | 176  | 179  | 146  | 128  | 173  | 0.73 | 0.015987 | 134  | 164  | 119  | 149  | 125  | 185  | 160  | 174  | 134  | 184  | 0.73     | 0.024463 | 194  | 0.89     | 0.045729 |
| 256925_at | A1g22200 | unknown protein - supported by full-length expressed protein                            | 624  | 657  | 829  | 873  | 938  | 751  | 737  | 854  | 0.86 | 0.220394 | 649  | 662  | 717  | 795  | 788  | 748  | 708  | 683  | 676  | 781  | 0.92     | 0.189744 | 838  | 0.81     | 0.002088 |
| 256926_at | A1g22190 | AP2 domain containing protein RAP2, AP2 domain-containing transcriptional fac           | 624  | 126  | 158  | 166  | 159  | 133  | 130  | 153  | 0.85 | 0.281641 | 63   | 72   | 85   | 96   | 85   | 64   | 69   | 73   | 73   | 78   | 0.94     | 0.660203 | 82   | 0.89     | 0.505469 |
| 256927_at | A1g12630 | transcriptional activator CBF1, putative AP2 domain-containing protein                  | 73   | 88   | 114  | 107  | 119  | 107  | 92   | 111  | 0.83 | 0.205127 | 58   | 58   | 67   | 71   | 57   | 66   | 67   | 59   | 61   | 64   | 0.95     | 0.460092 | 65   | 0.94     | 0.473174 |
| 256928_at | A1g12640 | unknown protein                                                                         | 188  | 270  | 305  | 304  | 347  | 255  | 254  | 302  | 0.84 | 0.336890 | 232  | 237  | 251  | 329  | 285  | 286  | 302  | 327  | 240  | 306  | 0.78     | 0.025573 | 300  | 0.80     | 0.017600 |
| 256929_at | A1g12650 | hypothetical protein predicted by gene: expressed protein                               | 228  | 290  | 359  | 360  | 359  | 298  | 294  | 351  | 0.89 | 0.438626 | 370  | 416  | 381  | 410  | 382  | 410  | 382  | 410  | 382  | 410  | 0.92     | 0.315221 | 430  | 0.91     | 0.346777 |
| 256930_at | A1g12660 | hypothetical protein predicted by gene: hypothetical protein                            | 25   | 18   | 26   | 25   | 24   | 24   | 23   | 24   | 0.96 | 0.732341 | 38   | 42   | 41   | 14   | 21   | 19   | 24   | 22   | 40   | 20   | 2.00     | 0.001070 | 18   | 2.21     | 0.000895 |
| 256931_at | A1g12710 | hypothetical protein similar to putative / F-box family protein / SKP1 interacting c    | 132  | 165  | 197  | 215  | 261  | 196  | 165  | 224  | 0.74 | 0.093420 | 148  | 142  | 161  | 257  | 187  | 177  |      |      |      |      |          |          |      |          |          |

|             |            |                                                                                     |      |      |      |      |      |      |      |      |      |          |      |      |      |      |      |      |      |      |      |      |      |          |      |      |          |
|-------------|------------|-------------------------------------------------------------------------------------|------|------|------|------|------|------|------|------|------|----------|------|------|------|------|------|------|------|------|------|------|------|----------|------|------|----------|
| 258584_s_at | A1t1g67050 | unknown protein; supported by full-length expressed protein                         | 29   | 53   | 33   | 66   | 63   | 56   | 38   | 62   | 0.82 | 0.043363 | 27   | 38   | 29   | 40   | 33   | 30   | 41   | 35   | 31   | 36   | 0.87 | 0.290115 | 34   | 0.91 | 0.556079 |
| 258585_s_at | A1t1g66950 | ABC transporter; putative similar to AB ABC transporter family protein              | 41   | 57   | 64   | 83   | 53   | 55   | 54   | 64   | 0.85 | 0.444910 | 193  | 152  | 218  | 142  | 120  | 108  | 172  | 152  | 188  | 139  | 1.35 | 0.056262 | 123  | 1.52 | 0.041247 |
| 258586_s_at | A1t1g66940 | unknown protein identical to unknown protein kinase-related                         | 87   | 125  | 87   | 142  | 118  | 113  | 100  | 124  | 0.80 | 0.194206 | 81   | 87   | 93   | 79   | 79   | 66   | 71   | 59   | 87   | 71   | 1.23 | 0.033000 | 74   | 1.16 | 0.097522 |
| 258587_s_at | A1t1g67080 | unknown protein supported by full-length expressed protein                          | 316  | 401  | 567  | 458  | 433  | 537  | 481  | 537  | 0.81 | 0.234740 | 524  | 466  | 531  | 539  | 710  | 690  | 627  | 710  | 690  | 627  | 0.76 | 0.002633 | 700  | 0.76 | 0.026469 |
| 258588_s_at | A1t1g67030 | zinc finger protein (ZFP6) identical to z zinc finger (C2H2 type) family protein (Z | 47   | 64   | 67   | 54   | 64   | 50   | 59   | 56   | 1.06 | 0.687888 | 32   | 31   | 36   | 29   | 23   | 25   | 30   | 27   | 33   | 27   | 1.23 | 0.022522 | 25   | 1.28 | 0.030751 |
| 258589_s_at | A1t5g34930 | putative protein embryonic abundant p argenolate dehydrogenase                      | 174  | 209  | 191  | 237  | 259  | 205  | 191  | 234  | 0.82 | 0.084900 | 81   | 68   | 77   | 115  | 87   | 76   | 104  | 92   | 75   | 95   | 0.79 | 0.083094 | 83   | 0.81 | 0.228515 |
| 258590_s_at | A1t5g34940 | putative protein heparanase, Homo sa glycosyl hydrolase family 79 N-terminal        | 173  | 190  | 142  | 364  | 239  | 204  | 161  | 332  | 0.49 | 0.002371 | 90   | 68   | 97   | 256  | 229  | 142  | 173  | 146  | 85   | 189  | 0.45 | 0.015329 | 209  | 0.41 | 0.024978 |
| 258591_s_at | A1t5g34920 | putative vacuolar sorting receptor protein                                          | 16   | 17   | 22   | 22   | 23   | 20   | 15   | 22   | 0.77 | 0.000777 | 20   | 15   | 22   | 19   | 15   | 17   | 18   | 15   | 17   | 18   | 0.76 | 0.396880 | 18   | 0.76 | 0.029095 |
| 258592_s_at | A1t5g30300 | hyothetical protein predicted by geneaf nodulin-related                             | 38   | 43   | 48   | 59   | 61   | 51   | 43   | 57   | 0.75 | 0.028830 | 35   | 43   | 37   | 49   | 37   | 39   | 40   | 42   | 38   | 41   | 0.92 | 0.339565 | 42   | 0.91 | 0.442591 |
| 258593_s_at | A1t2g30310 | outative GDSL-motif liase/hydrolase s GDSL-motif liase/hydrolase family croh        | 12   | 12   | 21   | 15   | 17   | 19   | 15   | 17   | 0.88 | 0.545794 | 11   | 11   | 15   | 12   | 12   | 18   | 13   | 16   | 12   | 14   | 0.86 | 0.343492 | 14   | 0.88 | 0.528178 |
| 258594_s_at | A1t2g30320 | putative pseudouridine synthase RNA pseudouridine synthase famly orc                | 114  | 119  | 124  | 140  | 158  | 135  | 119  | 145  | 0.82 | 0.026073 | 108  | 111  | 124  | 152  | 118  | 109  | 135  | 121  | 114  | 127  | 0.90 | 0.284045 | 126  | 0.91 | 0.442761 |
| 258595_s_at | A1t2g30330 | unknown protein                                                                     | 96   | 122  | 128  | 133  | 157  | 123  | 115  | 138  | 0.84 | 0.148982 | 134  | 181  | 155  | 159  | 155  | 156  | 151  | 147  | 157  | 161  | 0.97 | 0.777409 | 170  | 0.92 | 0.548544 |
| 258596_s_at | A1t2g30350 | hyothetical protein predicted by geneaf exoribonuclease amino terminal doma         | 80   | 108  | 111  | 111  | 111  | 95   | 99   | 108  | 0.94 | 0.588881 | 89   | 106  | 114  | 131  | 103  | 90   | 86   | 78   | 103  | 98   | 1.05 | 0.707184 | 108  | 0.95 | 0.736845 |
| 258597_s_at | A1t2g30370 | hyothetical protein predicted by geneaf allegrine-related                           | 40   | 58   | 47   | 61   | 72   | 63   | 49   | 65   | 0.74 | 0.051825 | 54   | 58   | 60   | 64   | 53   | 52   | 50   | 53   | 57   | 55   | 1.05 | 0.462467 | 56   | 1.02 | 0.843200 |
| 258598_s_at | A1t2g30380 | putative MYB family transcription factor expressed protein                          | 20   | 25   | 28   | 27   | 29   | 27   | 24   | 28   | 0.87 | 0.188136 | 22   | 23   | 27   | 22   | 21   | 20   | 28   | 19   | 24   | 22   | 1.08 | 0.468233 | 21   | 1.12 | 0.192101 |
| 258599_s_at | A1t2g30270 | unknown protein                                                                     | 89   | 101  | 113  | 115  | 116  | 99   | 100  | 110  | 0.91 | 0.359652 | 106  | 111  | 119  | 137  | 127  | 124  | 139  | 122  | 112  | 130  | 0.86 | 0.017660 | 129  | 0.87 | 0.034686 |
| 258600_s_at | A1t2g30600 | unknown small nuclear ribonucleoretein small nuclear ribonucleoretein U2B, ou       | 47   | 62   | 454  | 476  | 510  | 415  | 391  | 467  | 0.84 | 0.194761 | 423  | 486  | 512  | 686  | 536  | 539  | 473  | 487  | 544  | 587  | 0.87 | 0.237471 | 587  | 0.81 | 0.113785 |
| 258601_s_at | A1t2g30260 | putative small nuclear ribonucleoretein small nuclear ribonucleoretein U2B, ou      | 499  | 621  | 653  | 719  | 756  | 597  | 591  | 691  | 0.86 | 0.212057 | 518  | 675  | 637  | 787  | 661  | 639  | 609  | 601  | 610  | 659  | 0.93 | 0.417372 | 696  | 0.88 | 0.265304 |
| 258602_s_at | A1t2g30360 | putative protein kinase contains a prote CBL-interacting protein kinase 11 (CIPK    | 50   | 86   | 90   | 96   | 124  | 101  | 75   | 107  | 0.70 | 0.107732 | 32   | 35   | 48   | 50   | 38   | 37   | 48   | 50   | 38   | 44   | 0.86 | 0.302653 | 41   | 0.93 | 0.662945 |
| 258603_s_at | A1t2g30340 | hyothetical protein predicted by geneaf LOS domain protein 13 / lateral ornan bc    | 32   | 22   | 25   | 28   | 24   | 23   | 27   | 24   | 1.09 | 0.516222 | 20   | 23   | 22   | 22   | 22   | 23   | 19   | 21   | 21   | 21   | 1.00 | 0.996200 | 22   | 0.96 | 0.386930 |
| 258604_s_at | A1t2g30550 | hyothetical protein predicted by geneaf expressed protein                           | 437  | 456  | 411  | 573  | 528  | 506  | 435  | 536  | 0.81 | 0.013305 | 374  | 323  | 464  | 548  | 460  | 393  | 391  | 390  | 387  | 434  | 0.89 | 0.395733 | 463  | 0.84 | 0.291145 |
| 258605_s_at | A1t2g30500 | putative protein kinase contains a rote protein kinase family protein /// protein k | 24   | 24   | 23   | 19   | 27   | 18   | 23   | 22   | 1.04 | 0.777202 | 17   | 23   | 16   | 12   | 8    | 12   | 15   | 13   | 19   | 12   | 1.53 | 0.031760 | 11   | 1.73 | 0.043615 |
| 258606_s_at | A1t2g30480 | hyothetical protein                                                                 | 48   | 67   | 57   | 84   | 94   | 74   | 57   | 84   | 0.68 | 0.028117 | 56   | 50   | 54   | 86   | 73   | 62   | 66   | 58   | 53   | 69   | 0.77 | 0.054339 | 74   | 0.72 | 0.044786 |
| 258607_s_at | A1t2g30460 | outative PTR2 family peotide transporto protein-dependent oligopeotide transpo      | 29   | 32   | 36   | 48   | 41   | 40   | 33   | 43   | 0.76 | 0.030154 | 23   | 30   | 28   | 39   | 41   | 26   | 49   | 44   | 27   | 40   | 0.68 | 0.059766 | 35   | 0.77 | 0.205767 |
| 258608_s_at | A1t2g30500 | 40S ribosomal protein S26 40S ribosomal protein S26 (RPS26A) ///                    | 1966 | 2176 | 2248 | 2384 | 2462 | 2389 | 2130 | 2412 | 0.88 | 0.033017 | 1571 | 2101 | 1857 | 2300 | 1737 | 1637 | 1920 | 1913 | 1843 | 1902 | 0.97 | 0.766459 | 1892 | 0.97 | 0.859462 |
| 258609_s_at | A1t2g30580 | putative protein kinase contains a prote protein kinase family protein              | 29   | 36   | 44   | 41   | 40   | 39   | 36   | 40   | 0.90 | 0.439422 | 27   | 27   | 32   | 29   | 26   | 29   | 32   | 32   | 29   | 30   | 0.97 | 0.642732 | 28   | 1.02 | 0.742277 |
| 258610_s_at | A1t2g30570 | outative initiator RNA phosphoribosyl- I initiator RNA phosphoribosyl-ferase        | 241  | 396  | 202  | 213  | 231  | 168  | 180  | 204  | 0.88 | 0.418930 | 170  | 154  | 164  | 211  | 171  | 162  | 180  | 167  | 163  | 178  | 0.91 | 0.249152 | 181  | 0.90 | 0.306229 |
| 258611_s_at | A1t2g30610 | outative exoanin , supported by full-kei expresse, putative (EXPN)                  | 32   | 50   | 42   | 37   | 44   | 35   | 41   | 38   | 1.06 | 0.634860 | 30   | 25   | 36   | 24   | 29   | 33   | 24   | 31   | 30   | 28   | 1.07 | 0.548016 | 29   | 1.05 | 0.724357 |
| 258612_s_at | A1t2g30620 | unknown protein supported by full-ken L36 domain protein 15 / lateral ornan bc      | 21   | 21   | 22   | 22   | 24   | 21   | 21   | 21   | 1.01 | 0.852072 | 19   | 22   | 25   | 19   | 20   | 20   | 20   | 20   | 20   | 20   | 1.06 | 0.413125 | 20   | 1.07 | 0.445036 |
| 258613_s_at | A1t2g30530 | hyothetical protein predicted by geneaf expressed protein                           | 8    | 10   | 11   | 10   | 10   | 11   | 10   | 10   | 0.93 | 0.328865 | 16   | 15   | 15   | 12   | 11   | 12   | 11   | 14   | 16   | 12   | 1.33 | 0.002312 | 12   | 1.35 | 0.001396 |
| 258614_s_at | A1t2g30475 | Expressed protein ; supported by full-kei expressed protein                         | 51   | 54   | 69   | 89   | 76   | 82   | 58   | 83   | 0.70 | 0.021366 | 51   | 50   | 60   | 83   | 59   | 58   | 58   | 59   | 54   | 63   | 0.85 | 0.221943 | 66   | 0.81 | 0.224677 |
| 258615_s_at | A1t2g30490 | putative uroporphyrinogen decarboxylase uroporphyrinogen decarboxylase, putati      | 217  | 364  | 312  | 328  | 371  | 263  | 298  | 321  | 0.93 | 0.084838 | 239  | 275  | 253  | 332  | 293  | 247  | 265  | 274  | 256  | 282  | 0.91 | 0.248051 | 290  | 0.88 | 0.246448 |
| 258616_s_at | A1t2g30460 | hyothetical protein predicted by geneaf expressed protein                           | 117  | 143  | 107  | 117  | 117  | 107  | 107  | 107  | 0.84 | 0.028117 | 117  | 107  | 107  | 107  | 107  | 107  | 107  | 107  | 107  | 107  | 0.84 | 0.028117 | 107  | 0.84 | 0.028117 |
| 258617_s_at | A1t2g30630 | hyothetical protein predicted by geneaf expressed protein                           | 88   | 122  | 117  | 139  | 146  | 107  | 109  | 131  | 0.83 | 0.246411 | 76   | 84   | 89   | 118  | 85   | 72   | 104  | 95   | 83   | 95   | 0.87 | 0.305244 | 92   | 0.90 | 0.555246 |
| 258618_s_at | A1t2g30540 | outative potassium transporter ; suopo potassium transporter, putative (KT2)        | 286  | 378  | 284  | 421  | 487  | 395  | 316  | 434  | 0.73 | 0.046352 | 243  | 219  | 266  | 431  | 352  | 285  | 366  | 372  | 243  | 361  | 0.67 | 0.010970 | 356  | 0.68 | 0.062742 |
| 258619_s_at | A1t2g33340 | putative PRP19-like spliceosomal protein transducin family protein / WD-40 repeat   | 644  | 872  | 910  | 907  | 988  | 720  | 809  | 871  | 0.93 | 0.613554 | 644  | 573  | 637  | 865  | 678  | 635  | 850  | 828  | 611  | 771  | 0.79 | 0.050335 | 726  | 0.84 | 0.193974 |
| 258620_s_at | A1t2g33350 | hyothetical protein predicted by geneaf expressed protein                           | 40   | 49   | 59   | 69   | 47   | 39   | 55   | 70   | 0.70 | 0.050335 | 36   | 34   | 38   | 42   | 41   | 42   | 43   | 38   | 43   | 43   | 0.81 | 0.001434 | 42   | 0.81 | 0.003959 |
| 258621_s_at | A1t2g33360 | hyothetical protein predicted by geneaf expressed protein                           | 53   | 62   | 64   | 77   | 86   | 72   | 59   | 78   | 0.76 | 0.024949 | 39   | 39   | 40   | 56   | 44   | 37   | 54   | 50   | 39   | 48   | 0.81 | 0.089580 | 46   | 0.86 | 0.306202 |
| 258622_s_at | A1t2g33390 | unknown protein                                                                     | 109  | 149  | 173  | 157  | 188  | 124  | 143  | 156  | 0.92 | 0.651432 | 127  | 124  | 123  | 182  | 156  | 149  | 141  | 140  | 125  | 154  | 0.81 | 0.030145 | 162  | 0.77 | 0.021386 |
| 258623_s_at | A1t2g33410 | putative RNA-binding protein                                                        | 949  | 1098 | 1206 | 1331 | 1501 | 1200 | 1084 | 1344 | 0.81 | 0.086125 | 913  | 850  | 920  | 1319 | 1102 | 1008 | 1059 | 1025 | 894  | 1103 | 0.81 | 0.035282 | 1143 | 0.78 | 0.058351 |
| 258624_s_at | A1t2g33420 | unknown protein                                                                     | 55   | 59   | 64   | 57   | 72   | 55   | 59   | 61   | 0.87 | 0.742638 | 30   | 22   | 28   | 22   | 28   | 24   | 22   | 26   | 27   | 24   | 1.12 | 0.228567 | 24   | 1.11 | 0.378189 |
| 258625_s_at | A1t2g33440 | putative solingic factor UZAF large chain RNA recombinant motif (RRM)-containing    | 112  | 163  | 145  | 163  | 206  | 133  | 140  | 167  | 0.84 | 0.359072 | 106  | 100  | 107  | 167  | 124  | 104  | 133  | 107  | 104  | 133  | 0.79 | 0.070074 | 137  | 0.76 | 0.277788 |
| 258626_s_at | A1t2g33460 | unknown protein                                                                     | 37   | 41   | 50   | 51   | 53   | 46   | 43   | 50   | 0.86 | 0.175925 | 27   | 28   | 31   | 30   | 22   | 27   | 31   | 30   | 29   | 28   | 1.02 | 0.829447 | 27   | 1.08 | 0.499190 |
| 258627_s_at | A1t2g33490 | unknown protein                                                                     | 123  | 141  | 135  | 146  | 163  | 130  | 126  | 146  | 0.87 | 0.258339 | 100  | 95   | 115  | 125  | 118  | 98   | 120  | 110  | 103  | 114  | 0.91 | 0.207886 | 114  | 0.91 | 0.362765 |
| 258628_s_at | A1t2g33500 | unknown protein                                                                     | 105  | 171  | 206  | 207  | 231  | 178  | 167  | 205  | 0.82 | 0.245628 | 129  | 171  | 177  | 203  | 163  | 147  | 159  | 156  | 159  | 166  | 0.96 | 0.711444 | 171  | 0.93 | 0.602171 |
| 258629_s_at | A1t2g33520 | unknown protein                                                                     | 29   | 38   | 45   | 48   | 43   | 42   | 34   | 37   | 0.60 | 0.250403 | 43   | 29   | 32   | 29   | 26   | 27   | 26   | 28   | 26   | 28   | 0.75 | 0.145475 | 26   | 1.09 | 0.343046 |
| 258630_s_at | A1t2g33260 | putative tyrosine-specific transpoatase cro tyrocinan/tyrosine seermase famly orc   | 47   | 61   | 62   | 67   | 64   | 63   | 57   | 65   | 0.87 | 0.165513 | 42   | 45   | 48   | 51   | 44   | 44   | 52   | 52   | 45   | 49   | 0.93 | 0.295297 | 46   | 0.98 | 0.767126 |
| 258631_s_at | A1t2g33530 | putative serine carboxypeptidase II serine carboxypeptidase S10 famly pro           | 272  | 292  | 279  | 489  | 547  | 437  | 281  | 491  | 0.57 | 0.002809 | 179  | 150  | 196  | 453  | 330  | 290  | 267  | 269  | 175  |      |      |          |      |      |          |

|             |           |                                                                                         |      |      |      |      |      |      |      |      |          |          |      |      |      |      |      |      |      |      |      |      |          |          |          |          |          |          |
|-------------|-----------|-----------------------------------------------------------------------------------------|------|------|------|------|------|------|------|------|----------|----------|------|------|------|------|------|------|------|------|------|------|----------|----------|----------|----------|----------|----------|
| 255759_at   | At1g16790 | hyothetical protein predicted by geneer ribosomal protein-related                       | 234  | 309  | 259  | 296  | 302  | 276  | 291  | 0.82 | 0.365081 | 300      | 332  | 324  | 428  | 360  | 326  | 359  | 347  | 319  | 364  | 0.88 | 0.106247 | 371      | 0.86     | 0.169324 |          |          |
| 255760_at   | At1g16780 | vacuolar-type H+-translocating organo vacuolar-type H+-translocating inorganic          | 245  | 345  | 365  | 402  | 441  | 365  | 325  | 0.91 | 0.107479 | 272      | 280  | 332  | 407  | 337  | 376  | 321  | 305  | 288  | 329  | 0.87 | 0.260618 | 340      | 0.85     | 0.300240 |          |          |
| 255761_at   | At1g16770 | hyothetical protein predicted by geneer hyothetical protein                             | 57   | 69   | 79   | 90   | 74   | 63   | 68   | 76   | 0.90     | 0.508646 | 41   | 48   | 54   | 55   | 44   | 58   | 60   | 48   | 53   | 0.91 | 0.385911 | 48       | 0.99     | 0.932513 |          |          |
| 255762_at   | At1g16760 | hyothetical protein contains Plam profile: TAZ zinc finger family protein / zinc finger | 129  | 167  | 129  | 121  | 134  | 179  | 160  | 200  | 0.82     | 0.171201 | 134  | 137  | 160  | 152  | 143  | 156  | 141  | 156  | 143  | 156  | 0.90     | 0.138202 | 159      | 0.98     | 0.903686 |          |
| 255763_at   | At1g16730 | hyothetical protein predicted by geneer expressed protein                               | 29   | 27   | 40   | 115  | 49   | 46   | 32   | 70   | 0.45     | 0.173727 | 30   | 30   | 35   | 40   | 32   | 35   | 39   | 30   | 31   | 35   | 0.89     | 0.236116 | 36       | 0.88     | 0.290509 |          |
| 255764_at   | At1g16720 | unknown protein                                                                         | 181  | 264  | 279  | 301  | 343  | 235  | 241  | 293  | 0.82     | 0.302459 | 237  | 189  | 250  | 323  | 289  | 230  | 279  | 254  | 225  | 275  | 0.82     | 0.094888 | 281      | 0.80     | 0.168512 |          |
| 255765_at   | At1g16760 | protein kinase, putative contains Plam protein kinase family protein                    | 25   | 17   | 25   | 18   | 20   | 22   | 20   | 114  | 0.407004 | 14       | 22   | 22   | 15   | 13   | 11   | 16   | 18   | 16   | 15   | 1.09 | 0.835772 | 13       | 1.24     | 0.375979 |          |          |
| 255766_at   | At1g16750 | unknown protein                                                                         | 284  | 362  | 356  | 541  | 690  | 544  | 339  | 807  | 0.56     | 0.076088 | 544  | 339  | 407  | 586  | 409  | 357  | 446  | 357  | 446  | 0.82 | 0.018888 | 451      | 0.81     | 0.070202 |          |          |
| 255767_at   | At1g16740 | ribosomal protein L20, autative similar: ribosomal protein L20 family protein           | 712  | 820  | 773  | 841  | 887  | 793  | 769  | 840  | 0.91     | 0.158918 | 940  | 918  | 1021 | 1249 | 994  | 945  | 920  | 901  | 960  | 1002 | 0.96     | 0.647770 | 1063     | 0.90     | 0.357909 |          |
| 255768_at   | At1g16705 | Expressed protein: supported by full-length acetyltransferase-related orot              | 1047 | 1163 | 1209 | 1298 | 1550 | 1162 | 1170 | 1336 | 0.88     | 0.283868 | 1362 | 1469 | 1386 | 1587 | 1564 | 1410 | 1545 | 1571 | 1406 | 1589 | 0.88     | 0.117023 | 1610     | 0.87     | 0.204392 |          |
| 255769_at   | At1g18610 | hyothetical protein predicted by geneer hot repeat-containing protein                   | 117  | 198  | 190  | 209  | 230  | 174  | 168  | 204  | 0.82     | 0.303251 | 101  | 85   | 104  | 122  | 108  | 111  | 94   | 101  | 97   | 107  | 0.90     | 0.215165 | 114      | 0.85     | 0.075629 |          |
| 255770_at   | At1g18560 | hyothetical protein predicted by geneer h+ dimerization domain-containing orot          | 62   | 71   | 75   | 76   | 93   | 73   | 69   | 81   | 0.86     | 0.178234 | 62   | 57   | 70   | 82   | 76   | 63   | 74   | 75   | 63   | 74   | 0.85     | 0.063497 | 74       | 0.85     | 0.186636 |          |
| 255771_at   | At1g18550 | hyothetical protein contains similarly / kinesin motor protein-related                  | 103  | 120  | 97   | 106  | 140  | 102  | 107  | 123  | 0.87     | 0.289022 | 92   | 68   | 68   | 97   | 106  | 83   | 88   | 88   | 85   | 96   | 0.87     | 0.332336 | 105      | 0.81     | 0.268310 |          |
| 255772_at   | At1g18530 | calmodulin, putative similar to calmodu; calmodulin, putative                           | 13   | 7    | 13   | 11   | 12   | 11   | 12   | 15   | 0.95     | 0.757901 | 8    | 7    | 7    | 10   | 9    | 9    | 6    | 7    | 9    | 9    | 0.86     | 0.194453 | 9        | 0.79     | 0.016849 |          |
| 255773_at   | At1g18590 | flavonol 4'-sulfotransferase, putative si sulfotransferase family protein               | 67   | 65   | 87   | 68   | 86   | 84   | 73   | 79   | 0.92     | 0.524962 | 46   | 40   | 54   | 42   | 63   | 54   | 72   | 64   | 47   | 59   | 0.79     | 0.156029 | 53       | 0.88     | 0.045103 |          |
| 255774_at   | At1g18620 | unknown protein                                                                         | 634  | 734  | 835  | 778  | 961  | 860  | 734  | 807  | 0.91     | 0.151293 | 696  | 691  | 763  | 924  | 842  | 612  | 1017 | 1007 | 717  | 880  | 0.81     | 0.154159 | 793      | 0.90     | 0.474262 |          |
| 255775_at   | At1g18600 | hyothetical protein predicted by geneer thromboid family protein                        | 232  | 273  | 255  | 314  | 369  | 305  | 254  | 329  | 0.77     | 0.031272 | 259  | 216  | 250  | 302  | 319  | 259  | 318  | 242  | 317  | 0.76 | 0.048806 | 323      | 0.75     | 0.113588 |          |          |
| 255776_at   | At1g18540 | 60S ribosomal protein L6, putative sim 60S ribosomal protein L6 (RPL6A)                 | 636  | 2640 | 2591 | 2829 | 2962 | 2802 | 2529 | 2864 | 0.88     | 0.029321 | 2335 | 2609 | 2658 | 3382 | 2781 | 2338 | 2800 | 2554 | 2820 | 291  | 0.91     | 0.288114 | 2824     | 0.90     | 0.437080 |          |
| 255777_at   | At1g18630 | glycine-rich RNA-binding protein, putat glycine-rich RNA-binding protein, putativ       | 284  | 346  | 500  | 398  | 478  | 484  | 377  | 453  | 0.83     | 0.332683 | 203  | 201  | 264  | 311  | 240  | 238  | 337  | 283  | 223  | 282  | 0.79     | 0.096262 | 323      | 0.85     | 0.271920 |          |
| 255778_at   | At1g18640 | 3-phosphoserine phosphatase identical 3-phosphoserine phosphatase (PSP)                 | 247  | 293  | 277  | 350  | 401  | 305  | 273  | 352  | 0.78     | 0.081887 | 280  | 278  | 290  | 437  | 354  | 326  | 336  | 322  | 282  | 355  | 0.79     | 0.024211 | 372      | 0.76     | 0.054513 |          |
| 255779_at   | At1g18650 | unknown protein similar to beta-1,3-alc glycosyl hydrolase family protein 17            | 683  | 841  | 771  | 1037 | 1184 | 940  | 765  | 1053 | 0.73     | 0.027032 | 765  | 811  | 859  | 1214 | 1018 | 890  | 1013 | 957  | 812  | 1024 | 0.79     | 0.040762 | 1051     | 0.77     | 0.086930 |          |
| 255780_at   | At1g18580 | hyothetical protein contains Plam fro glycosyltransferase family protein 8              | 108  | 128  | 138  | 163  | 163  | 130  | 125  | 152  | 0.82     | 0.122777 | 79   | 88   | 79   | 115  | 89   | 83   | 106  | 95   | 82   | 98   | 0.84     | 0.094771 | 96       | 0.86     | 0.257049 |          |
| 255783_at   | At1g18570 | myb factor, putative similar to myb fact myb family transcription factor (MYB51)        | 30   | 30   | 36   | 40   | 36   | 39   | 32   | 38   | 0.84     | 0.059831 | 24   | 30   | 34   | 29   | 24   | 34   | 28   | 29   | 28   | 1.05 | 0.651063 | 26       | 1.14     | 0.334216 |          |          |
| 255784_at   | At1g13040 | auxin-induced protein, putative similar: auxin-responsive protein, putative             | 27   | 29   | 40   | 41   | 44   | 30   | 32   | 38   | 0.83     | 0.328124 | 28   | 30   | 29   | 36   | 28   | 29   | 32   | 24   | 29   | 30   | 0.97     | 0.760752 | 31       | 0.94     | 0.516705 |          |
| 255785_s_at | At1g13080 | polygalacturonase, putative similar to c glycoside hydrolase family 28 protein / p      | 8    | 7    | 8    | 6    | 8    | 8    | 8    | 7    | 1.09     | 0.431945 | 12   | 8    | 5    | 6    | 6    | 12   | 7    | 10   | 8    | 1.02 | 0.951381 | 8        | 1.04     | 0.920903 |          |          |
| 255786_s_at | At1g25540 | hyothetical protein similar to putative c photochrome and flower time regulat           | 199  | 246  | 266  | 255  | 292  | 211  | 237  | 253  | 0.94     | 0.838520 | 250  | 229  | 240  | 289  | 265  | 217  | 255  | 280  | 240  | 253  | 0.95     | 0.343124 | 250      | 0.96     | 0.579799 |          |
| 255787_at   | At1g25530 | lysine and histidine specific transporter lysine and histidine specific transporter,    | 44   | 59   | 58   | 65   | 60   | 47   | 54   | 57   | 0.94     | 0.650826 | 58   | 68   | 73   | 67   | 65   | 60   | 88   | 72   | 66   | 70   | 0.94     | 0.578216 | 64       | 1.03     | 0.690500 |          |
| 255787_at   | At1g25510 | hyothetical protein similar to unknown aspartyl protease family protein                 | 646  | 633  | 594  | 799  | 809  | 667  | 624  | 758  | 0.82     | 0.050954 | 343  | 377  | 717  | 636  | 573  | 469  | 648  | 657  | 479  | 597  | 0.80     | 0.279147 | 560      | 0.86     | 0.565880 |          |
| 255788_at   | At1g25500 | unknown protein                                                                         | 109  | 153  | 154  | 167  | 199  | 141  | 139  | 169  | 0.82     | 0.248620 | 110  | 119  | 123  | 157  | 131  | 132  | 139  | 142  | 117  | 140  | 0.84     | 0.016018 | 140      | 0.84     | 0.072414 |          |
| 255789_at   | At1g24900 | hyothetical protein similar to putative c AP2 domain-containing transcription fac       | 166  | 228  | 227  | 237  | 276  | 166  | 228  | 227  | 0.94     | 0.648494 | 164  | 192  | 161  | 236  | 179  | 163  | 206  | 188  | 250  | 193  | 0.88     | 0.250303 | 193      | 0.93     | 0.603136 |          |
| 255790_at   | At1g24900 | divinorflavonol 4-reductase, putative c oxidoreductase family protein                   | 23   | 26   | 25   | 22   | 28   | 25   | 25   | 25   | 0.99     | 0.946353 | 28   | 42   | 36   | 23   | 22   | 29   | 26   | 35   | 25   | 1.43 | 0.021829 | 23       | 1.55     | 0.003944 |          |          |
| 255791_at   | At1g25490 | phosphoserine phosphatase 2A, recu serine/threonine protein phosphatase 2f              | 574  | 702  | 646  | 753  | 877  | 642  | 639  | 757  | 0.84     | 0.204848 | 497  | 451  | 509  | 676  | 587  | 482  | 624  | 590  | 485  | 592  | 0.82     | 0.052699 | 582      | 0.83     | 0.178216 |          |
| 255792_at   | At1g24540 | faty acid condensing enzyme CUT1, c very-long-chain fatty acid condensing en            | 294  | 236  | 294  | 367  | 370  | 613  | 275  | 350  | 0.78     | 0.049311 | 321  | 314  | 352  | 535  | 387  | 362  | 423  | 452  | 329  | 430  | 0.76     | 0.054699 | 425      | 0.77     | 0.169112 |          |
| 255793_at   | At1g24400 | unknown protein                                                                         | 262  | 366  | 362  | 361  | 463  | 331  | 262  | 385  | 0.85     | 0.318494 | 312  | 333  | 314  | 526  | 399  | 354  | 369  | 329  | 407  | 399  | 0.79     | 0.018215 | 424      | 0.75     | 0.045476 |          |
| 255794_at   | At1g25550 | hyothetical protein similar to putative t myb family transcription factor               | 79   | 95   | 103  | 53   | 68   | 40   | 93   | 54   | 1.73     | 0.022850 | 136  | 149  | 130  | 86   | 60   | 73   | 81   | 70   | 138  | 74   | 1.87     | 0.000127 | 73       | 1.90     | 0.002316 |          |
| 255795_at   | At1g25520 | transmembrane protein, putative simle expressed protein                                 | 276  | 308  | 323  | 392  | 410  | 338  | 302  | 380  | 0.80     | 0.030928 | 279  | 259  | 302  | 439  | 338  | 299  | 331  | 317  | 280  | 345  | 0.81     | 0.030775 | 359      | 0.78     | 0.143819 |          |
| 255796_at   | At1g25380 | unknown protein contains similarity to c mitochondrial substrate carrier family or      | 246  | 333  | 317  | 337  | 420  | 328  | 298  | 361  | 0.83     | 0.187135 | 243  | 225  | 270  | 310  | 287  | 255  | 313  | 308  | 246  | 294  | 0.84     | 0.031671 | 284      | 0.87     | 0.140035 |          |
| 255797_at   | At1g24900 | unknown protein                                                                         | 262  | 366  | 362  | 361  | 463  | 331  | 262  | 385  | 0.85     | 0.318494 | 312  | 333  | 314  | 526  | 399  | 354  | 369  | 329  | 407  | 399  | 0.79     | 0.018215 | 424      | 0.75     | 0.045476 |          |
| 255798_at   | At1g25570 | hyothetical protein predicted by geneer leucine-rich repeat protein-related             | 175  | 230  | 240  | 299  | 339  | 261  | 215  | 300  | 0.72     | 0.048292 | 143  | 143  | 161  | 232  | 186  | 163  | 158  | 153  | 149  | 178  | 0.83     | 0.187119 | 194      | 0.77     | 0.100703 |          |
| 255799_at   | At1g25580 | unknown protein similar to hyothetical no apical meristem (NAM) family protein          | 146  | 173  | 183  | 206  | 220  | 179  | 168  | 202  | 0.83     | 0.103194 | 135  | 121  | 137  | 181  | 146  | 143  | 184  | 166  | 131  | 126  | 1.04     | 0.80     | 0.033667 | 157      | 0.84     | 0.126106 |
| 255800_at   | At1g25390 | well-associated kinase, putative simila protein kinase family protein                   | 160  | 208  | 240  | 230  | 269  | 211  | 203  | 237  | 0.86     | 0.302825 | 157  | 142  | 158  | 188  | 193  | 153  | 205  | 190  | 153  | 186  | 0.82     | 0.034901 | 178      | 0.86     | 0.135923 |          |
| 255801_at   | At1g25410 | RNA isocoenitril transferase, outative RNA isocoenitril transferase, outative: i        | 24   | 24   | 20   | 29   | 30   | 24   | 24   | 29   | 0.82     | 0.027978 | 24   | 21   | 25   | 24   | 21   | 25   | 22   | 23   | 23   | 1.03 | 0.619088 | 23       | 1.01     | 0.941480 |          |          |
| 255802_at   | At1g25560 | DNA-binding protein RAY2, putative si AP2 domain-containing transcription fac           | 135  | 156  | 193  | 124  | 144  | 114  | 161  | 127  | 1.26     | 0.152433 | 168  | 165  | 152  | 166  | 132  | 127  | 108  | 143  | 79   | 162  | 0.93     | 0.780663 | 123      | 0.93     | 0.064102 |          |
| 255803_at   | At1g25375 | unknown protein: supported by cDNA: metallo-beta-lactamase family protein               | 175  | 234  | 243  | 270  | 310  | 244  | 218  | 274  | 0.79     | 0.121771 | 173  | 145  | 180  | 247  | 222  | 183  | 213  | 214  | 166  | 216  | 0.77     | 0.018760 | 217      | 0.76     | 0.073547 |          |
| 255804_at   | At1g32040 | hyothetical protein predicted by geneer hyothetical protein                             | 28   | 39   | 38   | 33   | 43   | 36   | 35   | 37   | 0.93     | 0.587011 | 29   | 25   | 27   | 26   | 24   | 27   | 27   | 27   | 27   | 26   | 1.03     | 0.511744 | 26       | 1.05     | 0.462918 |          |
| 255805_at   | At1g32030 | hyothetical protein predicted by geneer expressed protein                               | 18   | 23   | 27   | 27   | 23   | 24   | 23   | 25   | 0.93     | 0.602150 | 16   | 16   | 17   | 19   | 14   | 15   | 18   | 33   | 16   | 20   | 0.83     | 0.490809 | 16       | 1.03     | 0.780098 |          |
| 255806_at   | At1g32020 | heat shock transcription factor, putative F-box family protein                          | 25   | 28   | 29   | 28   | 33   | 34   | 28   | 34   | 0.85     | 0.078263 | 21   | 25   | 27   | 26   | 23   | 24   | 25   | 23   | 23   | 21   | 0.96     | 0.734593 | 27       | 0.89     | 0.404839 |          |
| 255807_s_at | At1g32010 | hyothetical protein predicted by geneer myosin heavy chain-related                      | 13   | 14   | 25   | 18   | 18   | 22   | 17   | 19   | 0.90     | 0.672450 | 15   | 23   |      |      |      |      |      |      |      |      |          |          |          |          |          |          |

|             |           |                                                                                      |       |      |      |      |      |      |      |      |      |          |      |      |      |      |      |      |      |      |      |       |          |          |      |          |          |
|-------------|-----------|--------------------------------------------------------------------------------------|-------|------|------|------|------|------|------|------|------|----------|------|------|------|------|------|------|------|------|------|-------|----------|----------|------|----------|----------|
| 256672_at   | Ak4g00310 | hypothetical protein ; supported by cDI expressed protein                            | 81    | 103  | 99   | 122  | 129  | 113  | 94   | 121  | 0.78 | 0.031130 | 105  | 118  | 115  | 183  | 132  | 130  | 131  | 121  | 112  | 139   | 0.81     | 0.126235 | 148  | 0.76     | 0.114356 |
| 256673_at   | Ak4g00340 | Similar to receptor-like protein kinases c-Srcous glycoprotein family protein / curc | 60    | 80   | 62   | 99   | 107  | 73   | 67   | 93   | 0.72 | 0.085112 | 28   | 22   | 27   | 35   | 39   | 31   | 31   | 27   | 26   | 32    | 0.79     | 0.065257 | 35   | 0.73     | 0.036939 |
| 256674_at   | Ak4g00430 | crorable plasma membrane intrinsic or plasma membrane intrinsic protein, puta        | 2716  | 3057 | 2698 | 3431 | 3801 | 3153 | 2824 | 3462 | 0.82 | 0.044693 | 2269 | 2686 | 2499 | 3924 | 3133 | 2691 | 2897 | 2842 | 2478 | 3097  | 0.80     | 0.087308 | 3249 | 0.76     | 0.111468 |
| 256675_at   | Ak4g00450 | MyC1 transcription factor family protein                                             | 54    | 30   | 61   | 61   | 33   | 54   | 35   | 60   | 0.57 | 0.000500 | 33   | 30   | 41   | 35   | 60   | 30   | 30   | 30   | 30   | 30    | 0.81     | 0.000976 | 60   | 0.60     | 0.025230 |
| 256676_at   | Ak4g00490 | putative beta-annase similar to the fan beta-annase, cutative / 1,4-alpha-D-olu      | 216   | 324  | 337  | 465  | 484  | 401  | 292  | 450  | 0.65 | 0.026734 | 229  | 192  | 258  | 412  | 337  | 283  | 323  | 322  | 226  | 335   | 0.68     | 0.013556 | 344  | 0.66     | 0.049100 |
| 256677_at   | Ak4g00500 | putative calmodulin-binding heat shock lipase class 3 family protein / calmodulin    | 113   | 145  | 157  | 193  | 192  | 152  | 138  | 179  | 0.77 | 0.093435 | 157  | 157  | 169  | 256  | 206  | 194  | 186  | 181  | 205  | 0.79  | 0.050292 | 218      | 0.74 | 0.040569 |          |
| 256678_at   | Ak4g00510 | predicted protein with unknown function cyclic nucleotide-binding domain-contair     | 54    | 69   | 73   | 80   | 92   | 80   | 65   | 84   | 0.77 | 0.049513 | 48   | 52   | 58   | 72   | 62   | 62   | 69   | 62   | 61   | 0.66  | 0.80     | 0.012890 | 65   | 0.81     | 0.051628 |
| 256679_at   | Ak4g00520 | putative acyl-CoA thioesterase                                                       | 47    | 51   | 47   | 69   | 78   | 67   | 43   | 51   | 0.78 | 0.000409 | 51   | 51   | 51   | 78   | 67   | 51   | 64   | 51   | 51   | 0.76  | 0.031977 | 64       | 0.61 | 0.032644 |          |
| 256680_at   | Ak4g00530 | hypothetical protein                                                                 | 68    | 79   | 83   | 99   | 97   | 84   | 77   | 93   | 0.82 | 0.070121 | 56   | 56   | 61   | 83   | 64   | 63   | 72   | 74   | 50   | 0.81  | 0.036028 | 70       | 0.82 | 0.139565 |          |
| 256681_at   | Ak4g00550 | predicted protein of unknown function UDP-galactose-MGDOG oalactosyltransfe          | 144   | 193  | 230  | 236  | 230  | 182  | 177  | 216  | 0.82 | 0.171872 | 157  | 145  | 164  | 235  | 188  | 176  | 218  | 194  | 155  | 202   | 0.77     | 0.019245 | 199  | 0.78     | 0.077219 |
| 256682_at   | Ak4g00560 | outative dTDP-6-deoxy-L-mannose-dep methionine adenosyltransferase regulat           | 129   | 244  | 332  | 271  | 340  | 222  | 273  | 278  | 0.98 | 0.933026 | 222  | 298  | 243  | 330  | 250  | 283  | 266  | 247  | 254  | 275   | 0.92     | 0.458014 | 287  | 0.89     | 0.367040 |
| 256683_at   | Ak4g00570 | putative malate oxidoreductase                                                       | 428   | 465  | 463  | 526  | 631  | 503  | 458  | 553  | 0.83 | 0.004188 | 333  | 215  | 301  | 360  | 331  | 260  | 336  | 318  | 283  | 321   | 0.88     | 0.307352 | 317  | 0.89     | 0.502735 |
| 256684_at   | Ak4g00590 | putative glycylasparaginase                                                          | 98    | 145  | 162  | 171  | 145  | 135  | 155  | 151  | 0.82 | 0.034231 | 129  | 140  | 134  | 179  | 135  | 132  | 155  | 144  | 134  | 149   | 0.90     | 0.249544 | 149  | 0.90     | 0.406384 |
| 256685_s_at | Ak4g00600 | putative tetrahydrofolate synthase simil                                             | 250   | 276  | 251  | 328  | 340  | 299  | 259  | 322  | 0.80 | 0.013522 | 269  | 272  | 328  | 455  | 362  | 330  | 295  | 316  | 290  | 352   | 0.82     | 0.171384 | 382  | 0.76     | 0.092755 |
| 256686_at   | Ak4g00630 | putative potassium/H+ antiporter                                                     | 245   | 242  | 338  | 327  | 370  | 292  | 309  | 330  | 0.94 | 0.614440 | 227  | 195  | 217  | 278  | 216  | 197  | 256  | 240  | 213  | 237   | 0.90     | 0.275378 | 230  | 0.92     | 0.542787 |
| 256687_at   | Ak4g00640 | hypothetical protein                                                                 | 24    | 35   | 23   | 39   | 50   | 32   | 27   | 40   | 0.68 | 0.117020 | 8    | 10   | 12   | 9    | 10   | 11   | 12   | 12   | 10   | 11    | 0.92     | 0.408621 | 10   | 0.99     | 0.901594 |
| 256688_at   | Ak4g00660 | putative RNA helicase similar to ATP-D DEAD/DEAF box helicase, putative              | 296   | 396  | 400  | 433  | 447  | 342  | 364  | 407  | 0.59 | 0.041692 | 282  | 254  | 295  | 358  | 303  | 262  | 327  | 309  | 277  | 312   | 0.89     | 0.173257 | 308  | 0.90     | 0.364066 |
| 256689_at   | Ak4g00670 | hypothetical protein                                                                 | 4     | 3    | 3    | 3    | 2    | 3    | 3    | 3    | 1.16 | 0.334275 | 4    | 2    | 6    | 6    | 4    | 2    | 6    | 4    | 4    | 4     | 0.96     | 0.900872 | 4    | 1.07     | 0.851938 |
| 256691_at   | Ak4g00690 | hypothetical protein                                                                 | 25    | 30   | 34   | 30   | 34   | 32   | 29   | 32   | 0.93 | 0.432140 | 24   | 21   | 26   | 33   | 28   | 26   | 22   | 24   | 27   | 0.87  | 0.217586 | 30       | 0.80 | 0.064935 |          |
| 256693_at   | Ak4g00700 | putative phosphoribosyltransferase tra                                               | 30    | 33   | 53   | 42   | 44   | 40   | 39   | 42   | 0.92 | 0.687029 | 40   | 31   | 38   | 33   | 24   | 36   | 44   | 33   | 36   | 34    | 1.07     | 0.638968 | 31   | 1.17     | 0.283704 |
| 256694_at   | Ak4g00710 | hypothetical protein                                                                 | 267   | 349  | 322  | 375  | 443  | 309  | 313  | 376  | 0.83 | 0.245178 | 308  | 264  | 302  | 399  | 368  | 313  | 374  | 350  | 291  | 361   | 0.81     | 0.016363 | 360  | 0.81     | 0.075772 |
| 256695_at   | Ak4g00680 | outative acin-deacetyl-merizor factor; ac actin-depolymerizing factor, putative      | 11    | 11   | 14   | 15   | 15   | 13   | 12   | 14   | 0.83 | 0.146593 | 7    | 10   | 10   | 7    | 8    | 11   | 10   | 7    | 9    | 9     | 1.06     | 0.666339 | 8    | 1.08     | 0.680314 |
| 256696_at   | Ak4g00585 | Expressed protein ; supported by full- expressed protein                             | 431   | 541  | 525  | 592  | 700  | 547  | 499  | 613  | 0.81 | 0.116106 | 635  | 616  | 625  | 848  | 754  | 686  | 576  | 551  | 625  | 683   | 0.92     | 0.463992 | 763  | 0.82     | 0.044394 |
| 256697_at   | Ak4g00650 | hypothetical protein ; supported by cDI FRIGIDA protein                              | 85    | 109  | 119  | 125  | 149  | 114  | 105  | 129  | 0.81 | 0.183614 | 67   | 53   | 66   | 66   | 55   | 65   | 66   | 64   | 62   | 63    | 0.99     | 0.839335 | 62   | 1.00     | 0.963900 |
| 256698_at   | Ak4g00720 | Shacy related protein kinase Ietha : s shacy-related protein kinase theta / AS       | 300   | 390  | 424  | 420  | 486  | 350  | 372  | 419  | 0.89 | 0.429774 | 220  | 181  | 223  | 294  | 252  | 230  | 285  | 278  | 208  | 268   | 0.88     | 0.187442 | 258  | 0.81     | 0.096595 |
| 256699_at   | Ak4g00730 | homeodomain protein AHPD ; supporti antihyacinthe2 (ANL2)                            | 184   | 252  | 330  | 309  | 335  | 272  | 256  | 305  | 0.84 | 0.341107 | 166  | 188  | 200  | 233  | 193  | 180  | 208  | 200  | 185  | 203   | 0.91     | 0.249153 | 202  | 0.92     | 0.419694 |
| 256700_at   | Ak4g00750 | hypothetical protein                                                                 | 439   | 392  | 447  | 507  | 434  | 352  | 426  | 431  | 0.99 | 0.924865 | 514  | 426  | 634  | 629  | 501  | 416  | 607  | 609  | 525  | 553   | 0.95     | 0.704763 | 516  | 1.02     | 0.921360 |
| 256701_at   | Ak4g00740 | predicted protein of unknown function                                                | 486   | 510  | 480  | 678  | 711  | 570  | 492  | 653  | 0.75 | 0.020835 | 426  | 387  | 502  | 636  | 548  | 472  | 518  | 526  | 438  | 540   | 0.81     | 0.057964 | 552  | 0.79     | 0.121219 |
| 256702_at   | Ak4g00760 | putative protein                                                                     | 117   | 130  | 148  | 141  | 169  | 156  | 131  | 155  | 0.85 | 0.116381 | 101  | 91   | 110  | 127  | 118  | 105  | 135  | 113  | 100  | 120   | 0.84     | 0.055910 | 117  | 0.86     | 0.127937 |
| 256703_at   | Ak4g00780 | hypothetical protein                                                                 | 63    | 63   | 89   | 96   | 108  | 99   | 68   | 75   | 0.86 | 0.223707 | 37   | 39   | 43   | 39   | 44   | 42   | 39   | 43   | 39   | 40    | 0.92     | 0.199634 | 40   | 0.96     | 0.524686 |
| 256704_at   | Ak4g00800 | contains region of similarity to beta tra                                            | 48    | 68   | 77   | 58   | 86   | 77   | 58   | 82   | 0.71 | 0.025340 | 31   | 38   | 42   | 40   | 36   | 34   | 38   | 37   | 38   | 37    | 0.97     | 0.748874 | 36   | 1.02     | 0.822156 |
| 256705_at   | Ak4g00820 | hypothetical protein                                                                 | 39    | 354  | 280  | 508  | 600  | 408  | 313  | 505  | 0.62 | 0.032165 | 287  | 328  | 307  | 459  | 369  | 324  | 361  | 364  | 307  | 380   | 0.81     | 0.090651 | 391  | 0.79     | 0.152609 |
| 256706_at   | Ak4g00840 | hypothetical protein                                                                 | 807   | 102  | 118  | 116  | 130  | 101  | 103  | 116  | 0.89 | 0.347876 | 112  | 118  | 119  | 159  | 122  | 124  | 135  | 129  | 116  | 134   | 0.87     | 0.102035 | 135  | 0.86     | 0.203158 |
| 256707_at   | Ak4g00870 | coded for by A. thaliana cDNA T43872                                                 | 511   | 696  | 686  | 725  | 870  | 546  | 755  | 686  | 0.93 | 0.396668 | 878  | 737  | 852  | 1008 | 857  | 790  | 938  | 1049 | 825  | 928   | 0.92     | 0.173291 | 885  | 0.93     | 0.442079 |
| 256708_at   | Ak4g00880 | axin-responsive family protein                                                       | 17    | 19   | 22   | 27   | 31   | 24   | 19   | 27   | 0.71 | 0.026596 | 20   | 19   | 29   | 46   | 36   | 33   | 37   | 32   | 22   | 37    | 0.61     | 0.011039 | 39   | 0.58     | 0.030159 |
| 256709_at   | Ak4g00890 | protein-rich family protein                                                          | 20    | 23   | 19   | 22   | 23   | 31   | 21   | 26   | 0.81 | 0.173128 | 21   | 16   | 17   | 26   | 15   | 27   | 22   | 18   | 22   | 28    | 0.82     | 0.232365 | 21   | 0.87     | 0.507260 |
| 256710_at   | Ak4g00900 | Ca2+-transporting ATPase - like protein                                              | 280   | 254  | 299  | 331  | 365  | 285  | 278  | 327  | 0.85 | 0.138886 | 165  | 150  | 182  | 266  | 190  | 161  | 185  | 182  | 166  | 197   | 0.84     | 0.262078 | 206  | 0.81     | 0.289750 |
| 256711_at   | Ak4g00910 | coded for by A. thaliana cDNA T20730                                                 | 25    | 30   | 34   | 29   | 21   | 30   | 29   | 102  | 0.81 | 0.014916 | 21   | 21   | 26   | 26   | 24   | 26   | 24   | 26   | 24   | 25    | 0.86     | 0.886236 | 22   | 0.89     | 0.457576 |
| 256712_at   | Ak4g00920 | contains region of similarity to mouse n                                             | 11    | 21   | 20   | 8    | 11   | 9    | 14   | 9    | 1.51 | 0.259676 | 7    | 9    | 10   | 4    | 5    | 7    | 6    | 9    | 6    | 9     | 1.44     | 0.096169 | 5    | 1.63     | 0.069862 |
| 256713_s_at | Ak4g00930 | COP1-interacting protein 4.1 (CIP4.1 //                                              | 155   | 187  | 228  | 213  | 223  | 191  | 190  | 209  | 0.91 | 0.446713 | 128  | 135  | 160  | 179  | 159  | 141  | 153  | 150  | 141  | 156   | 0.90     | 0.215046 | 160  | 0.88     | 0.275900 |
| 256714_at   | Ak4g00940 | putative protein                                                                     | 23    | 31   | 28   | 31   | 32   | 22   | 28   | 30   | 0.96 | 0.827759 | 35   | 39   | 38   | 35   | 30   | 27   | 31   | 28   | 37   | 30    | 1.23     | 0.014206 | 31   | 1.21     | 0.070942 |
| 256715_at   | Ak4g00950 | putative protein                                                                     | 64    | 108  | 122  | 118  | 151  | 126  | 105  | 132  | 0.80 | 0.168156 | 74   | 78   | 83   | 103  | 79   | 81   | 87   | 97   | 78   | 91    | 0.86     | 0.084946 | 91   | 0.86     | 0.169516 |
| 256716_at   | Ak4g00960 | Similar to receptor kinase                                                           | 5     | 10   | 13   | 12   | 17   | 11   | 13   | 12   | 0.72 | 0.295641 | 11   | 10   | 11   | 9    | 8    | 9    | 8    | 8    | 9    | 8     | 1.26     | 0.002902 | 9    | 1.24     | 0.006353 |
| 256717_at   | Ak4g00970 | Similar to receptor kinase                                                           | 12    | 8    | 13   | 9    | 8    | 8    | 11   | 8    | 1.30 | 0.177612 | 6    | 12   | 8    | 8    | 8    | 8    | 7    | 8    | 8    | 8     | 1.12     | 0.521378 | 8    | 1.09     | 0.702283 |
| 256718_at   | Ak4g00980 | contains similarity to gap proteins                                                  | 40    | 59   | 59   | 65   | 73   | 60   | 52   | 66   | 0.79 | 0.141255 | 47   | 40   | 47   | 59   | 48   | 43   | 53   | 49   | 45   | 50    | 0.88     | 0.197887 | 50   | 0.89     | 0.352922 |
| 256719_at   | Ak4g00990 | outative protein (fragment) DNA-bindin                                               | 185   | 263  | 263  | 247  | 303  | 213  | 237  | 254  | 0.93 | 0.058885 | 101  | 90   | 118  | 145  | 117  | 107  | 110  | 98   | 103  | 115   | 0.89     | 0.347406 | 123  | 0.84     | 0.229882 |
| 256720_at   | Ak4g01010 | acidic ribosomal protein c1 similar to                                               | 10531 | 2451 | 2048 | 2616 | 2388 | 2146 | 2468 | 2816 | 0.86 | 0.000000 | 1985 | 2451 | 2089 | 2707 | 1985 | 1758 | 2239 | 2478 | 1973 | 2239  | 0.88     | 0.327393 | 2150 | 0.92     | 0.610145 |
| 256721_at   | Ak4g00770 | hypothetical protein ; supported by full- expressed protein                          | 19    | 20   | 22   | 29   | 28   | 24   | 20   | 27   | 0.75 | 0.020342 | 17   | 22   | 20   | 21   | 18   | 23   | 27   | 22   | 20   | 22    | 0.90     | 0.344938 | 21   | 0.96     | 0.758733 |
| 256722_at   | Ak4g00895 | Expressed protein ; supported by full-ATP                                            | 109   | 117  | 134  | 139  | 157  | 130  | 120  | 142  | 0.85 | 0.110350 | 128  | 178  | 166  | 207  | 183  | 163  | 161  | 159  | 157  | 175</ |          |          |      |          |          |

|             |           |                                                                                   |     |      |      |      |      |      |      |      |          |          |      |      |      |      |      |      |      |      |      |      |          |          |      |          |          |
|-------------|-----------|-----------------------------------------------------------------------------------|-----|------|------|------|------|------|------|------|----------|----------|------|------|------|------|------|------|------|------|------|------|----------|----------|------|----------|----------|
| 255583_at   | At4g01510 | hypothetical protein similar to C. elegans transmembrane ARV1-like family protein | 116 | 153  | 163  | 195  | 209  | 175  | 144  | 193  | 0.041588 | 129      | 142  | 144  | 225  | 166  | 154  | 157  | 148  | 138  | 170  | 0.81 | 0.145281 | 182      | 0.76 | 0.123788 |          |
| 255584_at   | At4g01530 | putative reverse transcriptase-like protein                                       | 8   | 6    | 12   | 13   | 11   | 10   | 9    | 11   | 0.775    | 251673   | 4    | 8    | 12   | 8    | 8    | 16   | 9    | 8    | 9    | 0.81 | 0.534196 | 8        | 1.00 | 0.997228 |          |
| 255585_at   | At4g01550 | putative NAM-like protein                                                         | 38  | 49   | 64   | 68   | 65   | 57   | 50   | 64   | 0.77     | 179686   | 46   | 61   | 48   | 62   | 43   | 53   | 56   | 52   | 51   | 1.01 | 0.925715 | 49       | 1.05 | 0.756747 |          |
| 255586_at   | At4g01570 | putative NAC protein : supported by full-length cDNA containing protein           | 47  | 63   | 68   | 59   | 65   | 50   | 43   | 56   | 0.85     | 0.042770 | 505  | 565  | 569  | 632  | 611  | 566  | 593  | 606  | 611  | 0.90 | 0.405861 | 604      | 0.81 | 0.936773 |          |
| 255587_at   | At4g01480 | invariant organic cholestase : succo ironanovic cholestase, cutative iso          | 47  | 63   | 67   | 56   | 49   | 47   | 59   | 50   | 1.18     | 0.253141 | 71   | 90   | 90   | 64   | 50   | 59   | 58   | 51   | 84   | 1.48 | 0.003599 | 58       | 1.45 | 0.027947 |          |
| 255588_at   | At4g01570 | hypothetical protein                                                              | 83  | 101  | 94   | 116  | 116  | 94   | 93   | 109  | 0.85     | 0.146179 | 80   | 75   | 92   | 131  | 87   | 83   | 94   | 83   | 82   | 0.86 | 0.337712 | 100      | 0.82 | 0.303388 |          |
| 255589_s_at | At4g01590 | hypothetical protein                                                              | 71  | 97   | 98   | 107  | 130  | 83   | 88   | 107  | 0.83     | 0.320264 | 95   | 95   | 95   | 148  | 102  | 111  | 104  | 93   | 95   | 111  | 0.85     | 0.242664 | 120  | 0.79     | 0.146683 |
| 255590_at   | At4g01410 | putative B-like cysteine protease, puta                                           | 107 | 1021 | 1394 | 1121 | 1362 | 1036 | 1233 | 0.91 | 0.113622 | 1070     | 1315 | 1167 | 1387 | 1276 | 1378 | 1276 | 1387 | 1276 | 1378 | 0.85 | 0.065126 | 1423     | 0.82 | 0.034353 |          |
| 255591_at   | At4g01630 | putative expansin                                                                 | 30  | 35   | 40   | 44   | 37   | 33   | 35   | 38   | 0.92     | 0.531519 | 26   | 27   | 30   | 28   | 34   | 26   | 35   | 29   | 28   | 30   | 0.92     | 0.384637 | 29   | 0.96     | 0.680970 |
| 255592_s_at | At4g01640 | hypothetical protein                                                              | 19  | 19   | 24   | 23   | 25   | 29   | 20   | 25   | 0.80     | 0.07629  | 18   | 16   | 19   | 19   | 20   | 13   | 19   | 16   | 18   | 1.01 | 0.927280 | 17       | 1.01 | 0.922434 |          |
| 255593_at   | At4g01650 | hypothetical protein                                                              | 48  | 77   | 83   | 81   | 107  | 78   | 69   | 89   | 0.78     | 0.243425 | 72   | 80   | 81   | 114  | 93   | 91   | 103  | 89   | 78   | 0.89 | 0.021741 | 99       | 0.78 | 0.050969 |          |
| 255594_at   | At4g01660 | putative ABC transporter                                                          | 151 | 149  | 159  | 177  | 187  | 157  | 153  | 174  | 0.88     | 0.096693 | 123  | 113  | 145  | 182  | 153  | 125  | 156  | 148  | 127  | 0.93 | 0.113336 | 153      | 0.83 | 0.224457 |          |
| 255595_at   | At4g01700 | putative chitinase similar to peanut ty                                           | 21  | 24   | 24   | 23   | 24   | 24   | 23   | 24   | 0.66     | 0.077046 | 17   | 22   | 21   | 34   | 27   | 25   | 26   | 20   | 28   | 0.71 | 0.012970 | 29       | 0.68 | 0.035781 |          |
| 255596_at   | At4g01720 | putative DNA-binding protein similar to WRKY family transcription factor          | 36  | 43   | 50   | 27   | 27   | 23   | 43   | 26   | 1.67     | 0.016396 | 25   | 20   | 33   | 17   | 16   | 19   | 23   | 17   | 26   | 1.38 | 0.064835 | 18       | 1.46 | 0.096622 |          |
| 255597_at   | At4g01730 | hypothetical protein                                                              | 236 | 294  | 214  | 253  | 265  | 210  | 248  | 243  | 1.02     | 0.867476 | 249  | 207  | 246  | 256  | 251  | 205  | 262  | 259  | 234  | 247  | 0.95     | 0.485872 | 237  | 0.98     | 0.873481 |
| 255598_s_at | At4g01740 | putative CHP-rich zinc finger protein sir DC1 domain-containing protein           | 28  | 36   | 42   | 45   | 52   | 44   | 35   | 47   | 0.75     | 0.059771 | 34   | 33   | 39   | 41   | 33   | 37   | 36   | 37   | 35   | 37   | 0.95     | 0.401686 | 37   | 0.95     | 0.538877 |
| 255599_s_at | At4g01750 | hypothetical protein                                                              | 241 | 367  | 246  | 308  | 314  | 459  | 243  | 406  | 0.82     | 0.256313 | 298  | 303  | 304  | 366  | 344  | 269  | 246  | 249  | 236  | 297  | 0.96     | 0.196616 | 308  | 0.78     | 0.016622 |
| 255600_at   | At4g01760 | putative CHP-rich zinc finger protein sir DC1 domain-containing protein           | 31  | 34   | 43   | 34   | 33   | 34   | 36   | 33   | 1.08     | 0.501259 | 26   | 24   | 32   | 26   | 26   | 23   | 24   | 28   | 27   | 26   | 1.06     | 0.501943 | 25   | 1.08     | 0.488170 |
| 255606_s_at | At4g01780 | hypothetical protein                                                              | 186 | 293  | 279  | 318  | 329  | 253  | 252  | 300  | 0.84     | 0.311126 | 266  | 271  | 278  | 430  | 303  | 277  | 380  | 345  | 272  | 347  | 0.78     | 0.082355 | 337  | 0.81     | 0.239736 |
| 255608_at   | At4g01790 | putative RNaseP-associated protein si                                             | 75  | 63   | 108  | 101  | 108  | 102  | 88   | 104  | 0.85     | 0.216807 | 94   | 125  | 111  | 161  | 121  | 109  | 115  | 110  | 110  | 123  | 0.89     | 0.389854 | 130  | 0.84     | 0.316661 |
| 255609_at   | At4g01575 | Expressed protein : supported by full-le                                          | 226 | 268  | 264  | 291  | 327  | 253  | 233  | 290  | 0.80     | 0.100185 | 298  | 303  | 290  | 328  | 266  | 246  | 249  | 236  | 297  | 265  | 1.12     | 0.194810 | 280  | 1.06     | 0.526697 |
| 255637_at   | At4g01690 | orotocarbonylhydrolase : suozote                                                  | 275 | 391  | 325  | 392  | 407  | 322  | 330  | 373  | 0.88     | 0.386263 | 331  | 351  | 342  | 512  | 373  | 333  | 414  | 409  | 342  | 408  | 0.84     | 0.145890 | 406  | 0.84     | 0.302357 |
| 255638_at   | At4g01680 | outative transcription factor : suozote                                           | 24  | 35   | 38   | 47   | 48   | 43   | 33   | 46   | 0.71     | 0.042229 | 41   | 42   | 45   | 57   | 48   | 45   | 52   | 46   | 43   | 49   | 0.87     | 0.074586 | 50   | 0.86     | 0.137240 |
| 255639_at   | At4g01710 | outative acin polymerization factor sir                                           | 184 | 270  | 265  | 254  | 289  | 253  | 240  | 265  | 0.90     | 0.448979 | 217  | 272  | 239  | 356  | 268  | 259  | 273  | 270  | 243  | 285  | 0.85     | 0.159172 | 295  | 0.82     | 0.202927 |
| 255640_at   | At4g01800 | putative SecA-type chloroplast protein                                            | 176 | 259  | 271  | 213  | 258  | 176  | 235  | 216  | 1.09     | 0.641534 | 199  | 210  | 218  | 253  | 219  | 199  | 244  | 231  | 199  | 229  | 0.91     | 0.178525 | 224  | 0.93     | 0.427462 |
| 255641_s_at | At4g01820 | P-glycoprotein-like protein poq3                                                  | 27  | 21   | 25   | 24   | 29   | 27   | 28   | 27   | 1.04     | 0.829368 | 14   | 19   | 19   | 21   | 13   | 17   | 17   | 18   | 19   | 18   | 0.95     | 0.733961 | 17   | 1.02     | 0.905465 |
| 255642_at   | At4g01860 | hypothetical protein                                                              | 60  | 78   | 71   | 85   | 67   | 70   | 74   | 0.94 | 0.602517 | 63       | 48   | 58   | 62   | 51   | 45   | 51   | 52   | 57   | 52   | 1.08 | 0.407387 | 53       | 1.07 | 0.589791 |          |
| 255643_at   | At4g01870 | predicted protein of unknown function                                             | 130 | 183  | 226  | 212  | 206  | 172  | 180  | 197  | 0.91     | 0.608030 | 145  | 149  | 149  | 165  | 149  | 132  | 223  | 200  | 148  | 174  | 0.85     | 0.286494 | 149  | 0.99     | 0.933389 |
| 255644_at   | At4g01880 | predicted protein of unknown function                                             | 118 | 162  | 145  | 161  | 177  | 142  | 142  | 160  | 0.89     | 0.327323 | 146  | 149  | 146  | 227  | 171  | 166  | 180  | 159  | 147  | 181  | 0.82     | 0.084800 | 188  | 0.78     | 0.107571 |
| 255645_at   | At4g01890 | putative calmodulin-binding protein                                               | 44  | 44   | 44   | 68   | 67   | 44   | 68   | 67   | 0.76     | 0.197847 | 29   | 31   | 38   | 42   | 32   | 42   | 37   | 40   | 34   | 37   | 0.90     | 0.349155 | 42   | 0.91     | 0.219608 |
| 255646_at   | At4g01910 | putative CHP-rich zinc finger protein sir DC1 domain-containing protein           | 44  | 35   | 56   | 47   | 57   | 51   | 41   | 52   | 0.79     | 0.267135 | 23   | 26   | 37   | 31   | 26   | 36   | 34   | 29   | 30   | 0.94 | 0.665263 | 28       | 1.04 | 0.835388 |          |
| 255647_at   | At4g01920 | putative CHP-rich zinc finger protein sir DC1 domain-containing protein           | 24  | 30   | 24   | 32   | 28   | 26   | 26   | 29   | 0.90     | 0.312566 | 26   | 25   | 25   | 24   | 25   | 25   | 31   | 31   | 25   | 27   | 0.93     | 0.418999 | 24   | 1.03     | 0.228477 |
| 255648_at   | At4g01930 | putative CHP-rich zinc finger protein sir DC1 domain-containing protein           | 16  | 20   | 27   | 23   | 29   | 24   | 21   | 26   | 0.82     | 0.268940 | 15   | 16   | 18   | 20   | 14   | 20   | 18   | 14   | 16   | 17   | 0.95     | 0.688813 | 18   | 0.91     | 0.470567 |
| 255649_at   | At4g01940 | predicted protein of unknown function                                             | 241 | 367  | 246  | 308  | 314  | 459  | 243  | 406  | 0.82     | 0.256313 | 298  | 303  | 290  | 328  | 266  | 246  | 249  | 236  | 297  | 265  | 1.12     | 0.194810 | 280  | 1.06     | 0.526697 |
| 255650_at   | At4g01970 | outative raffinose synthase or seed im                                            | 96  | 133  | 153  | 46   | 37   | 41   | 127  | 41   | 3.08     | 0.006794 | 241  | 248  | 189  | 74   | 69   | 67   | 104  | 101  | 226  | 83   | 2.72     | 0.000170 | 70   | 3.23     | 0.001128 |
| 255651_at   | At4g01840 | outative octanion channel : suozote                                               | 139 | 168  | 249  | 211  | 221  | 209  | 185  | 214  | 0.87     | 0.439453 | 75   | 86   | 96   | 115  | 79   | 85   | 104  | 100  | 86   | 97   | 0.88     | 0.291171 | 93   | 0.92     | 0.581413 |
| 255652_at   | At4g01850 | S-adenosylmethionine synthase 2                                                   | 835 | 1039 | 988  | 1113 | 1207 | 977  | 954  | 1105 | 0.86     | 0.173485 | 926  | 909  | 953  | 1247 | 1059 | 897  | 1121 | 1073 | 929  | 1079 | 0.86     | 0.095083 | 1088 | 0.87     | 0.246510 |
| 255653_at   | At4g01860 | Expressed protein : supported by full-le                                          | 231 | 367  | 246  | 308  | 314  | 459  | 243  | 406  | 0.82     | 0.256313 | 298  | 303  | 290  | 328  | 266  | 246  | 249  | 236  | 297  | 265  | 1.12     | 0.194810 | 280  | 1.06     | 0.526697 |
| 255654_at   | At4g01895 | Expressed protein : supported by full-le                                          | 176 | 237  | 241  | 275  | 297  | 235  | 218  | 269  | 0.81     | 0.141111 | 240  | 220  | 220  | 323  | 261  | 261  | 227  | 214  | 223  | 291  | 0.81     | 0.346414 | 268  | 0.81     | 0.063575 |
| 255655_at   | At4g01810 | outative iron transport factor : succo                                            | 201 | 248  | 227  | 234  | 268  | 207  | 225  | 237  | 0.95     | 0.641633 | 166  | 152  | 181  | 187  | 176  | 146  | 165  | 164  | 166  | 167  | 0.99     | 0.923742 | 169  | 0.98     | 0.838815 |
| 255656_at   | At4g01940 | outative NFU-like metalcluster assen                                              | 162 | 246  | 245  | 260  | 286  | 209  | 218  | 252  | 0.87     | 0.399485 | 215  | 251  | 236  | 383  | 273  | 256  | 271  | 247  | 234  | 286  | 0.82     | 0.174776 | 304  | 0.77     | 0.162902 |
| 255657_at   | At4g01960 | hypothetical protein : supported by cDN                                           | 144 | 171  | 165  | 224  | 265  | 183  | 166  | 224  | 0.74     | 0.095747 | 145  | 150  | 162  | 242  | 196  | 179  | 204  | 181  | 152  | 201  | 0.76     | 0.019946 | 207  | 0.74     | 0.047373 |
| 255658_at   | At4g01900 | P II nitrogen sensing protein (GLB I                                              | 120 | 148  | 167  | 604  | 625  | 649  | 605  | 655  | 0.62     | 0.028696 | 442  | 475  | 514  | 743  | 536  | 482  | 510  | 470  | 482  | 488  | 0.88     | 0.397247 | 470  | 0.88     | 0.268638 |
| 255659_at   | At4g02100 | putative NAK-like serthr protein kinase                                           | 132 | 173  | 177  | 201  | 200  | 168  | 160  | 190  | 0.85     | 0.178308 | 111  | 105  | 129  | 159  | 134  | 112  | 137  | 135  | 115  | 136  | 0.85     | 0.115011 | 135  | 0.85     | 0.257631 |
| 255660_at   | At4g02030 | hypothetical protein similar to C. elegans                                        | 222 | 264  | 262  | 295  | 319  | 271  | 249  | 295  | 0.84     | 0.079485 | 185  | 150  | 208  | 241  | 232  | 156  | 253  | 231  | 181  | 223  | 0.81     | 0.156760 | 210  | 0.86     | 0.410771 |
| 255661_at   | At4g02050 | putative hexose transporter similar to                                            | 308 | 425  | 504  | 319  | 336  | 221  | 242  | 292  | 1.41     | 0.148142 | 261  | 268  | 243  | 380  | 319  | 335  | 382  | 345  | 257  | 352  | 0.73     | 0.001534 | 345  | 0.75     | 0.010985 |
| 255662_at   | At4g02070 | GTF DNA mismatch repair enzyme simi                                               | 194 | 198  | 194  | 188  | 223  | 184  | 193  | 194  | 0.84     | 0.05667  | 124  | 103  | 150  | 142  | 146  | 132  | 133  | 140  | 146  | 138  | 0.82     | 0.235089 | 149  | 0.85     | 0.263687 |
| 255663_at   | At4g02090 | hypothetical protein                                                              | 47  | 63   | 81   | 71   | 93   | 74   | 64   | 80   | 0.80     | 0.253264 | 38   | 34   | 45   | 45   | 36   | 42   | 46   | 45   | 39   | 43   | 0.92     | 0.337743 | 41   | 0.96     | 0.690129 |
| 255664_at   | At4g02120 | CTP synthase - like protein                                                       | 240 | 345  | 352  | 388  | 429  | 323  | 312  | 380  | 0.82     | 0.228612 | 287  | 278  | 303  | 442  | 357  | 320  | 315  | 301  | 289  | 347  | 0.83     | 0.143670 | 373  | 0.78     | 0.084722 |
| 255665_at   | At4g0214  |                                                                                   |     |      |      |      |      |      |      |      |          |          |      |      |      |      |      |      |      |      |      |      |          |          |      |          |          |

|             |           |                                                                                        |      |      |      |      |      |      |      |      |          |           |      |      |      |      |      |      |      |      |      |      |          |          |          |          |          |          |
|-------------|-----------|----------------------------------------------------------------------------------------|------|------|------|------|------|------|------|------|----------|-----------|------|------|------|------|------|------|------|------|------|------|----------|----------|----------|----------|----------|----------|
| 254848_at   | Ak4g02630 | putative serine/threonine protein kinase protein kinase family protein                 | 177  | 205  | 269  | 271  | 313  | 216  | 217  | 267  | 0.81     | 0.272269  | 183  | 181  | 186  | 281  | 222  | 198  | 238  | 238  | 183  | 235  | 0.78     | 0.028881 | 233      | 0.79     | 0.113638 |          |
| 254849_at   | Ak4g02650 | predicted protein desaturation factor sir1 eapin N-terminal homolog (ENTH) dom         | 308  | 481  | 556  | 19   | 21   | 24   | 448  | 22   | 20.74    | 0.004357  | 1218 | 1414 | 1227 | 30   | 24   | 58   | 23   | 26   | 1286 | 32   | 39.79    | 0.000000 | 38       | 34.27    | 0.000042 |          |
| 254900_at   | Ak4g02660 | outative protein lysosomal trafficking r WD-40 repeat family protein / beige-rela      | 35   | 34   | 53   | 43   | 49   | 39   | 41   | 44   | 0.93     | 0.690006  | 23   | 26   | 33   | 24   | 27   | 22   | 28   | 21   | 28   | 24   | 1.13     | 0.319330 | 24       | 1.15     | 0.357867 |          |
| 254901_at   | Ak4g02670 | putative zinc finger protein similar to $\alpha$ zinc finger C2H2 type) family protein | 194  | 221  | 267  | 221  | 246  | 206  | 226  | 1.03 | 0.231369 | 287       | 313  | 233  | 309  | 238  | 238  | 238  | 238  | 238  | 238  | 1.16 | 0.145313 | 229      | 1.13     | 0.338987 |          |          |
| 254902_at   | Ak4g02680 | hyothetical protein similar to A. thaliana tetratricopeptide repeat (TPR)-containing   | 600  | 683  | 640  | 862  | 951  | 725  | 641  | 846  | 0.76     | 0.042618  | 585  | 499  | 661  | 826  | 786  | 592  | 814  | 793  | 582  | 762  | 0.76     | 0.035750 | 735      | 0.79     | 0.150298 |          |
| 254903_at   | Ak4g02690 | putative glutamate/aspartate-binding / hyothetical protein                             | 40   | 48   | 62   | 109  | 74   | 57   | 50   | 80   | 0.63     | 0.150163  | 34   | 35   | 44   | 46   | 42   | 42   | 42   | 43   | 39   | 37   | 42       | 0.88     | 0.115537 | 44       | 0.86     | 0.151592 |
| 254904_at   | Ak4g02710 | predicted protein of unknown function : kinase interacting family protein              | 52   | 69   | 79   | 73   | 91   | 66   | 63   | 77   | 0.83     | 0.282793  | 38   | 42   | 40   | 59   | 43   | 41   | 45   | 49   | 40   | 47   | 0.85     | 0.133485 | 48       | 0.84     | 0.255622 |          |
| 254905_at   | Ak4g02720 | predicted protein of unknown function : expressed protein                              | 298  | 326  | 390  | 425  | 369  | 426  | 373  | 426  | 0.78     | 0.04687   | 501  | 478  | 517  | 518  | 454  | 517  | 518  | 517  | 518  | 507  | 0.84     | 0.161184 | 548      | 0.8      | 0.146288 |          |
| 254906_at   | Ak4g02840 | putative protein similar to plant nucleic: bZIP transcription factor family protein    | 188  | 245  | 267  | 315  | 350  | 269  | 233  | 311  | 0.75     | 0.078696  | 264  | 262  | 275  | 388  | 369  | 301  | 329  | 316  | 267  | 342  | 0.78     | 0.020367 | 356      | 0.75     | 0.037899 |          |
| 254907_at   | Ak4g02850 | hyothetical protein similar to A. thaliana basic helix-loop-helix (bHLH) family vrot   | 194  | 280  | 284  | 373  | 395  | 324  | 253  | 364  | 0.69     | 0.036417  | 312  | 386  | 361  | 580  | 430  | 403  | 376  | 379  | 353  | 434  | 0.81     | 0.180063 | 471      | 0.75     | 0.117799 |          |
| 254908_at   | Ak4g02820 | outative vacuolar ATPase similar to va vacuolar ATPase subunit F family vrot           | 524  | 603  | 600  | 671  | 719  | 630  | 576  | 673  | 0.86     | 0.053638  | 659  | 720  | 723  | 889  | 783  | 722  | 684  | 687  | 701  | 753  | 0.93     | 0.365031 | 798      | 0.88     | 0.141059 |          |
| 254909_at   | Ak4g02730 | outative WD-720 repeat similar to C. transducin family protein / WD-40 repeat          | 128  | 165  | 177  | 204  | 212  | 177  | 157  | 175  | 0.79     | 0.030312  | 153  | 161  | 171  | 240  | 189  | 187  | 163  | 180  | 176  | 162  | 183      | 0.84     | 0.090259 | 203      | 0.79     | 0.040923 |
| 254910_at   | Ak4g02530 | predicted protein of unknown function : chloroplast thylakoid lumen protein            | 133  | 196  | 206  | 103  | 211  | 160  | 175  | 188  | 0.53     | 0.043011  | 220  | 278  | 261  | 313  | 250  | 239  | 273  | 266  | 253  | 268  | 0.94     | 0.495271 | 287      | 0.95     | 0.639563 |          |
| 254911_at   | Ak4g02570 | putative cullin-like 1 protein similar to C. cullin family protein                     | 768  | 932  | 979  | 1026 | 1087 | 808  | 893  | 974  | 0.92     | 0.489228  | 737  | 613  | 726  | 877  | 761  | 696  | 749  | 730  | 692  | 762  | 0.91     | 0.208576 | 776      | 0.89     | 0.264103 |          |
| 254912_at   | Ak4g02580 | predicted NADH dehydrogenase 24 kD NADH-ubiquinone oxidoreductase 24 kD                | 802  | 1046 | 958  | 1083 | 1255 | 980  | 935  | 1106 | 0.85     | 0.185392  | 1200 | 1217 | 1297 | 1720 | 1391 | 1290 | 1197 | 1238 | 1359 | 1399 | 0.91     | 0.388272 | 1467     | 0.84     | 0.160406 |          |
| 254913_at   | Ak4g02700 | sulfate transporter protein similar to sul sulfate transporter                         | 60   | 67   | 58   | 125  | 97   | 106  | 62   | 109  | 0.57     | 0.005739  | 91   | 96   | 117  | 165  | 115  | 91   | 109  | 112  | 101  | 119  | 0.85     | 0.358110 | 124      | 0.81     | 0.379400 |          |
| 254914_at   | Ak4g02560 | hyothetical protein : succos homeobox protein LUMINDEPENDENS                           | 200  | 244  | 242  | 279  | 289  | 248  | 229  | 272  | 0.84     | 0.083373  | 181  | 162  | 211  | 246  | 220  | 167  | 215  | 227  | 191  | 215  | 0.89     | 0.253796 | 211      | 0.91     | 0.475922 |          |
| 254915_at   | Ak4g02740 | hyothetical protein : F-box family protein                                             | 19   | 22   | 21   | 24   | 22   | 22   | 21   | 23   | 0.92     | 0.135127  | 20   | 17   | 24   | 23   | 19   | 21   | 29   | 19   | 20   | 22   | 0.91     | 0.507871 | 21       | 0.96     | 0.753118 |          |
| 254916_at   | Ak4g02750 | hyothetical protein similar to A. thaliana pentatricopeptide (PPR) repeat-containi     | 76   | 100  | 106  | 115  | 130  | 97   | 94   | 114  | 0.82     | 0.212768  | 82   | 77   | 94   | 110  | 89   | 76   | 106  | 102  | 84   | 97   | 0.87     | 0.228507 | 92       | 0.92     | 0.549915 |          |
| 254917_at   | Ak4g02790 | hyothetical protein similar to A. thaliana PZ-binding family protein                   | 108  | 163  | 160  | 191  | 221  | 165  | 144  | 193  | 0.75     | 0.110288  | 106  | 91   | 115  | 178  | 133  | 131  | 121  | 118  | 104  | 136  | 0.76     | 0.078838 | 147      | 0.70     | 0.060824 |          |
| 254918_at   | Ak4g02810 | hyothetical protein : expressed protein                                                | 44   | 56   | 69   | 64   | 63   | 64   | 56   | 64   | 0.89     | 0.332621  | 49   | 59   | 55   | 49   | 47   | 52   | 51   | 50   | 54   | 50   | 1.09     | 0.112981 | 49       | 1.10     | 0.200828 |          |
| 254919_at   | Ak4g02820 | hyothetical protein : pentatricopeptide (PPR) repeat-containi                          | 100  | 127  | 133  | 131  | 137  | 105  | 120  | 124  | 0.97     | 0.779158  | 90   | 92   | 102  | 137  | 111  | 98   | 109  | 101  | 95   | 111  | 0.85     | 0.137295 | 115      | 0.82     | 0.165545 |          |
| 254920_at   | Ak4g02850 | putative protein similar to TSJ8.18 phenazine biosynthesis PhzC/PhzF fam               | 35   | 43   | 51   | 48   | 51   | 46   | 43   | 48   | 0.89     | 0.315310  | 33   | 40   | 51   | 43   | 34   | 39   | 41   | 39   | 41   | 39   | 1.05     | 0.658376 | 39       | 1.06     | 0.688101 |          |
| 254921_at   | Ak4g02860 | putative protein similar to TSJ8.17 phenazine biosynthesis PhzC/PhzF fam               | 201  | 240  | 276  | 313  | 340  | 285  | 239  | 312  | 0.76     | 0.052848  | 287  | 355  | 341  | 462  | 408  | 358  | 394  | 365  | 328  | 403  | 0.81     | 0.076344 | 419      | 0.78     | 0.107680 |          |
| 254922_at   | Ak4g02880 | hyothetical protein similar to A. thaliana expressed protein                           | 214  | 246  | 288  | 290  | 335  | 245  | 249  | 290  | 0.86     | 0.291122  | 160  | 157  | 168  | 205  | 175  | 156  | 186  | 184  | 162  | 181  | 0.89     | 0.127653 | 179      | 0.90     | 0.313401 |          |
| 254923_at   | Ak4g02900 | hyothetical protein similar to A. thaliana early-responsive to dehydration protein-n   | 49   | 72   | 67   | 76   | 79   | 64   | 63   | 73   | 0.86     | 0.282414  | 49   | 52   | 56   | 65   | 62   | 53   | 60   | 56   | 52   | 59   | 0.88     | 0.061890 | 60       | 0.87     | 0.125165 |          |
| 254924_at   | Ak4g02910 | hyothetical protein : hyothetical protein                                              | 20   | 20   | 24   | 24   | 21   | 24   | 21   | 23   | 0.92     | 0.332826  | 21   | 26   | 23   | 22   | 24   | 24   | 22   | 19   | 23   | 22   | 1.05     | 0.481917 | 23       | 1.00     | 0.986083 |          |
| 254925_at   | Ak4g02930 | mitochondrial elongation factor Tu elongation factor Tu : outative / EF-Tu. $\alpha$   | 891  | 1006 | 1109 | 1318 | 1379 | 1050 | 1002 | 1249 | 0.80     | 0.106714  | 905  | 764  | 1000 | 1289 | 1094 | 992  | 957  | 997  | 890  | 1066 | 0.83     | 0.111958 | 1125     | 0.79     | 0.100842 |          |
| 254926_at   | Ak4g02920 | hyothetical protein : succuted by full-I expressed protein                             | 143  | 215  | 211  | 234  | 266  | 192  | 190  | 231  | 0.82     | 0.267836  | 265  | 263  | 271  | 388  | 297  | 281  | 297  | 286  | 299  | 0.89 | 0.340502 | 305      | 0.87     | 0.408826 |          |          |
| 254927_at   | Ak4g02770 | outative chototaxelam I reaction center chlorophyll a/b reaction center subunit II     | 971  | 1355 | 1291 | 1672 | 1511 | 1278 | 1414 | 1451 | 0.86     | 0.153392  | 1081 | 1414 | 1387 | 1772 | 1458 | 1522 | 1526 | 1499 | 1499 | 1526 | 0.94     | 0.290368 | 1499     | 0.95     | 0.766917 |          |
| 254928_at   | Ak4g02840 | small nuclear riboprotein Sm-D1-like p small nuclear ribonucleoprotein D1, puta        | 295  | 359  | 367  | 417  | 445  | 380  | 340  | 414  | 0.82     | 0.068227  | 266  | 328  | 352  | 454  | 330  | 308  | 416  | 394  | 315  | 381  | 0.83     | 0.157544 | 365      | 0.86     | 0.397281 |          |
| 254929_at   | Ak4g02890 | polyubiquitin (UBQ14) identical to G1-1 polyubiquitin (UBQ14) /// polyubiquitin (I     | 1525 | 1933 | 1863 | 2251 | 2300 | 2041 | 1774 | 2197 | 0.81     | 0.046939  | 1907 | 1890 | 1930 | 2653 | 2254 | 2069 | 2324 | 2363 | 1909 | 2333 | 0.82     | 0.015354 | 2325     | 0.82     | 0.073139 |          |
| 254930_at   | Ak4g02800 | hyothetical protein similar to A. thaliana expressed protein                           | 210  | 270  | 201  | 260  | 305  | 211  | 227  | 259  | 0.88     | 0.411803  | 216  | 193  | 215  | 318  | 261  | 262  | 220  | 205  | 288  | 253  | 0.82     | 0.143495 | 280      | 0.74     | 0.023571 |          |
| 254931_at   | Ak4g02780 | ent-kaurane synthetase A - like protein :cosalvi dihydrochate synthase / CPS / er      | 50   | 55   | 55   | 67   | 48   | 53   | 57   | 54   | 0.94     | 0.558874  | 40   | 43   | 42   | 38   | 33   | 38   | 44   | 39   | 42   | 38   | 1.09     | 0.213154 | 36       | 1.15     | 0.405607 |          |
| 254932_at   | Ak4g02940 | hyothetical protein similar to A. thaliana oxidoreductase, 20G-Fc(II) oxovanone I      | 84   | 109  | 109  | 104  | 94   | 83   | 100  | 94   | 1.07     | 0.568857  | 104  | 85   | 112  | 116  | 93   | 78   | 100  | 90   | 100  | 95   | 1.05     | 0.642730 | 96       | 1.05     | 0.754273 |          |
| 254933_at   | Ak4g02960 | outative polyovolein of LTR transposon copia-like retrotransposon family               | 39   | 51   | 44   | 41   | 45   | 39   | 45   | 41   | 1.08     | 0.443015  | 38   | 39   | 53   | 36   | 35   | 36   | 42   | 37   | 43   | 37   | 1.17     | 0.151782 | 36       | 1.22     | 0.179101 |          |
| 254934_s_at | Ak4g02970 | putative protein similar to T418.17 ubiquitin family protein                           | 15   | 15   | 21   | 15   | 19   | 15   | 17   | 16   | 1.03     | 0.853343  | 12   | 13   | 14   | 11   | 10   | 11   | 12   | 11   | 13   | 11   | 1.23     | 0.002334 | 11       | 1.26     | 0.008632 |          |
| 254935_at   | Ak4g02980 | hyothetical protein similar to A. thaliana mitochondrial transcription termination fa  | 112  | 147  | 146  | 166  | 193  | 136  | 134  | 164  | 0.82     | 0.107600  | 98   | 96   | 125  | 143  | 137  | 132  | 110  | 111  | 103  | 127  | 0.81     | 0.067229 | 137      | 0.75     | 0.040367 |          |
| 254936_at   | Ak4g03000 | putative protein similar to A. thaliana p expressed protein                            | 41   | 71   | 71   | 82   | 72   | 66   | 61   | 73   | 0.83     | 0.332622  | 49   | 46   | 51   | 60   | 53   | 48   | 57   | 57   | 49   | 55   | 0.89     | 0.096779 | 53       | 0.91     | 0.301613 |          |
| 254937_at   | Ak4g03010 | outative leucine-rich repeat protein sir leucine-rich repeat family protein            | 66   | 92   | 74   | 94   | 103  | 78   | 77   | 92   | 0.85     | 0.251737  | 71   | 57   | 75   | 96   | 74   | 64   | 77   | 70   | 68   | 76   | 0.89     | 0.345774 | 78       | 0.87     | 0.415261 |          |
| 254938_at   | Ak4g03020 | outative WD-repeat protein similar to L. transducin family protein / WD-40 repeat      | 224  | 322  | 289  | 358  | 385  | 299  | 278  | 347  | 0.80     | 0.147422  | 228  | 260  | 264  | 422  | 309  | 281  | 342  | 300  | 250  | 331  | 0.76     | 0.056941 | 337      | 0.74     | 0.122777 |          |
| 254939_at   | Ak4g03030 | predicted OR23 protein of unknown fun which repeat-containiing F-box family vrot       | 337  | 410  | 329  | 335  | 287  | 322  | 317  | 1.02 | 0.927367 | 251       | 253  | 261  | 338  | 271  | 253  | 317  | 253  | 317  | 294  | 0.87 | 0.100468 | 288      | 0.89     | 0.226152 |          |          |
| 254940_at   | Ak4g03040 | hyothetical protein : hyothetical protein                                              | 23   | 23   | 23   | 23   | 23   | 23   | 23   | 23   | 0.93     | 0.5204425 | 25   | 25   | 25   | 25   | 25   | 25   | 25   | 25   | 25   | 25   | 1.00     | 0.989899 | 25       | 1.05     | 0.766917 |          |
| 254941_at   | Ak4g03050 | putative oxidoreductase similar to A. th. 2-oxoglutarate-dependent diowenase, n        | 92   | 127  | 110  | 153  | 158  | 103  | 110  | 138  | 0.79     | 0.227329  | 119  | 106  | 134  | 130  | 129  | 122  | 130  | 124  | 120  | 127  | 0.94     | 0.293675 | 127      | 0.94     | 0.425709 |          |
| 254942_at   | Ak4g03060 | putative oxidoreductase similar to P. vi 2-oxoglutarate-dependent diowenase, n         | 31   | 30   | 40   | 35   | 37   | 40   | 34   | 37   | 0.90     | 0.349624  | 25   | 25   | 25   | 25   | 25   | 26   | 26   | 26   | 25   | 25   | 0.99     | 0.829322 | 25       | 1.01     | 0.776427 |          |
| 254943_at   | Ak4g03070 | putative oxidoreductase                                                                | 118  | 94   | 132  | 151  | 160  | 98   | 115  | 136  | 0.84     | 0.385274  | 214  | 228  | 194  | 304  | 225  | 162  | 268  | 257  | 212  | 249  | 0.85     | 0.204626 | 241      | 0.88     | 0.453323 |          |
| 254944_at   | Ak4g03080 | outative chototaxelam I reaction center chlorophyll a/b reaction center subunit II     | 971  | 1355 | 1291 | 1672 | 1511 | 1278 | 1414 | 1451 | 0.86     | 0.153392  | 1081 | 1414 |      |      |      |      |      |      |      |      |          |          |          |          |          |          |

|             |           |                                                                                     |                                               |     |     |     |     |     |     |     |      |          |          |          |     |     |     |     |     |      |          |          |          |          |          |          |          |
|-------------|-----------|-------------------------------------------------------------------------------------|-----------------------------------------------|-----|-----|-----|-----|-----|-----|-----|------|----------|----------|----------|-----|-----|-----|-----|-----|------|----------|----------|----------|----------|----------|----------|----------|
| 253939_at   | At4g03690 | hypothetical protein                                                                | pseudogene, similar to putative helicase      | 16  | 16  | 24  | 25  | 29  | 28  | 19  | 27   | 0.69     | 0.043883 | 17       | 18  | 19  | 16  | 21  | 20  | 21   | 18       | 19       | 0.95     | 0.581323 | 18       | 1.01     | 0.963511 |
| 253934_at   | At4g03700 | hypothetical protein similar to A. thaliana pseudogene, replication protein-related |                                               | 20  | 18  | 22  | 22  | 25  | 19  | 20  | 22   | 0.90     | 0.303284 | 18       | 22  | 20  | 17  | 18  | 18  | 17   | 20       | 17       | 1.15     | 0.033087 | 18       | 1.14     | 0.110598 |
| 253936_at   | At4g03710 | hypothetical protein                                                                | CACCA-like transposase family (En/Sor)        | 5   | 2   | 3   | 3   | 3   | 3   | 4   | 1.27 | 0.377890 | 3        | 6        | 2   | 2   | 4   | 1   | 8   | 4    | 4        | 1.10     | 0.885817 | 3        | 1.43     | 0.452007 |          |
| 253936_at   | At4g03720 | hypothetical protein                                                                | pseudogene, similar to putative AP endo-      | 81  | 102 | 111 | 128 | 151 | 138 | 101 | 130  | 0.75     | 0.530982 | 63       | 105 | 69  | 66  | 77  | 72  | 73   | 68       | 81       | 0.81     | 0.102122 | 80       | 0.78     | 0.146989 |
| 253937_at   | At4g03730 | putative transposon protein                                                         | CACCA-like transposase family (En/Sor)        | 45  | 58  | 71  | 60  | 62  | 62  | 58  | 61   | 0.95     | 0.706856 | 36       | 34  | 42  | 42  | 37  | 40  | 46   | 49       | 0.87     | 0.155278 | 40       | 0.94     | 0.453453 |          |
| 253938_at   | At4g03740 | hypothetical protein                                                                | hypothetical protein                          | 12  | 10  | 14  | 12  | 14  | 12  | 12  | 12   | 0.95     | 0.713743 | 8        | 16  | 14  | 10  | 7   | 7   | 11   | 9        | 1.40     | 0.111172 | 8        | 1.51     | 0.168954 |          |
| 253939_at   | At4g03750 | hypothetical protein                                                                | hypothetical protein                          | 10  | 50  | 56  | 56  | 66  | 53  | 49  | 58   | 0.85     | 0.181575 | 34       | 29  | 42  | 35  | 31  | 31  | 46   | 34       | 0.99     | 0.926746 | 32       | 1.08     | 0.537765 |          |
| 253940_at   | At4g03760 | hypothetical protein                                                                | pseudogene, hypothetical protein // pse       | 21  | 21  | 31  | 25  | 33  | 21  | 25  | 33   | 0.63     | 0.288222 | 22       | 23  | 22  | 23  | 24  | 23  | 21   | 21       | 0.97     | 0.237267 | 22       | 1.03     | 0.146989 |          |
| 253401_at   | At4g03600 | hypothetical protein - supported by full-length expressed protein                   |                                               | 53  | 63  | 83  | 83  | 94  | 80  | 66  | 85   | 0.77     | 0.116950 | 41       | 37  | 52  | 52  | 45  | 46  | 53   | 60       | 0.84     | 0.148738 | 48       | 0.91     | 0.416508 |          |
| 25374_at    | At4g03770 | hypothetical protein                                                                | gypsy-like retrotransposon family             | 7   | 6   | 13  | 9   | 8   | 7   | 8   | 1.04 | 0.903444 | 8        | 7        | 7   | 6   | 6   | 6   | 7   | 5    | 7        | 1.24     | 0.012343 | 6        | 1.25     | 0.010189 |          |
| 25375_at    | At4g03780 | putative athlia-like protein                                                        | ovosi-like retrotransposon family (Athlia)    | 5   | 6   | 5   | 5   | 4   | 4   | 5   | 1.22 | 0.144233 | 4        | 2        | 5   | 5   | 6   | 2   | 3   | 3    | 4        | 0.91     | 0.763600 | 5        | 0.80     | 0.562723 |          |
| 25375_x_at  | At4g03780 | putative athlia-like protein                                                        | gypsy-like retrotransposon family (Athlia)    | 42  | 82  | 64  | 39  | 86  | 81  | 63  | 69   | 0.91     | 0.764224 | 39       | 57  | 51  | 47  | 31  | 38  | 52   | 39       | 1.18     | 0.258012 | 39       | 1.26     | 0.215152 |          |
| 253441_at   | At4g03800 | hypothetical protein                                                                | gypsy-like retrotransposon family             | 14  | 10  | 11  | 11  | 14  | 12  | 10  | 11   | 12       | 0.93     | 0.127888 | 10  | 12  | 15  | 12  | 10  | 11   | 11       | 1.18     | 0.172888 | 11       | 1.18     | 0.334036 |          |
| 25347_at    | At4g03810 | putative retrotransposon protein                                                    | copii-like retrotransposon family // copii    | 2   | 1   | 0   | 1   | 0   | 1   | 1   | 0.94 | 0.919106 | 1        | 6        | 0   | 2   | 1   | 5   | 3   | 2    | 3        | 0.96     | 0.944593 | 3        | 0.93     | 0.928512 |          |
| 253448_at   | At4g03820 | hypothetical protein                                                                | expressed protein                             | 33  | 36  | 46  | 46  | 54  | 34  | 38  | 45   | 0.85     | 0.385146 | 32       | 31  | 32  | 42  | 34  | 31  | 40   | 33       | 0.88     | 0.173582 | 36       | 0.89     | 0.280646 |          |
| 253449_at   | At4g03830 | hypothetical protein                                                                | myosin heavy chain-related                    | 28  | 32  | 35  | 26  | 37  | 30  | 32  | 31   | 1.02     | 0.883936 | 28       | 28  | 33  | 30  | 28  | 27  | 36   | 28       | 1.00     | 0.967261 | 28       | 1.05     | 0.491230 |          |
| 253530_at   | At4g03840 | putative transposon protein similar to d                                            | ovosi-like retrotransposon family // ovo      | 94  | 111 | 221 | 131 | 102 | 163 | 142 | 132  | 1.08     | 0.824856 | 19       | 29  | 45  | 36  | 18  | 23  | 46   | 40       | 0.96     | 0.879798 | 26       | 1.21     | 0.583727 |          |
| 253531_x_at | At4g03850 | putative transposon protein similar to a                                            | ovosi-like retrotransposon family (Athlia)    | 26  | 36  | 41  | 36  | 47  | 40  | 35  | 41   | 0.85     | 0.323318 | 20       | 23  | 19  | 23  | 17  | 21  | 21   | 100      | 0.984701 | 20       | 1.03     | 0.787476 |          |          |
| 253532_at   | At4g03860 | putative transposon protein similar to a                                            | transposon protein -related                   | 7   | 7   | 15  | 9   | 11  | 12  | 10  | 10   | 0.92     | 0.768734 | 6        | 10  | 7   | 10  | 5   | 6   | 12   | 8        | 0.92     | 0.741301 | 7        | 1.07     | 0.814956 |          |
| 253533_at   | At4g03870 | putative transposon protein similar to M                                            | Mutator-like transposase family               | 20  | 23  | 31  | 27  | 28  | 31  | 24  | 29   | 0.85     | 0.256845 | 16       | 21  | 22  | 22  | 19  | 20  | 26   | 19       | 0.92     | 0.429651 | 20       | 0.96     | 0.660817 |          |
| 253534_at   | At4g03880 | putative transposon protein                                                         | putative transposon protein                   | 8   | 7   | 7   | 8   | 7   | 7   | 7   | 0.98 | 0.810849 | 6        | 5        | 7   | 7   | 8   | 5   | 10  | 8    | 8        | 0.81     | 0.290147 | 6        | 0.95     | 0.745432 |          |
| 253535_at   | At4g03890 | hypothetical protein                                                                | hypothetical protein                          | 10  | 13  | 14  | 16  | 14  | 15  | 12  | 15   | 0.85     | 0.149899 | 10       | 10  | 14  | 12  | 9   | 10  | 13   | 10       | 1.06     | 0.638289 | 11       | 1.10     | 0.542459 |          |
| 253536_x_at | At4g03900 | putative transposon protein                                                         | CACCA-like transposase family (PttA/En)       | 57  | 61  | 63  | 68  | 59  | 59  | 60  | 62   | 0.97     | 0.677887 | 57       | 50  | 76  | 51  | 50  | 51  | 48   | 41       | 1.26     | 0.075921 | 51       | 1.21     | 0.235236 |          |
| 253537_at   | At4g03930 | putative pectinesterase                                                             | pectin methylesterase, putative // oedin      | 9   | 8   | 11  | 7   | 8   | 8   | 9   | 8    | 1.20     | 0.136209 | 17       | 17  | 13  | 10  | 8   | 8   | 21   | 14       | 1.25     | 0.393450 | 9        | 1.76     | 0.008477 |          |
| 253538_at   | At4g03940 | hypothetical protein                                                                | expressed protein                             | 56  | 60  | 84  | 81  | 78  | 71  | 67  | 77   | 0.87     | 0.333909 | 37       | 37  | 42  | 43  | 38  | 40  | 57   | 46       | 0.87     | 0.254705 | 40       | 0.97     | 0.573494 |          |
| 253539_at   | At4g03950 | putative glucose-6-phosphate/phosphatase                                            | pseudogene, putative glucose 6-phosphatase    | 22  | 26  | 33  | 32  | 38  | 33  | 27  | 34   | 0.78     | 0.105642 | 24       | 27  | 30  | 24  | 22  | 24  | 28   | 25       | 27       | 1.11     | 0.186201 | 23       | 1.17     | 0.091152 |
| 253560_at   | At4g03960 | putative protein - supported by full-length                                         | pyruvate specific protein phosphatase fai     | 100 | 110 | 135 | 128 | 145 | 118 | 107 | 130  | 0.82     | 0.086889 | 97       | 127 | 115 | 158 | 114 | 121 | 114  | 117      | 1.13     | 0.322519 | 132      | 1.25     | 0.99     |          |
| 253561_at   | At4g03990 | hypothetical protein                                                                | hypothetical protein                          | 4   | 2   | 3   | 3   | 3   | 3   | 3   | 0.96 | 0.834965 | 2        | 2        | 5   | 3   | 2   | 3   | 5   | 4    | 3        | 0.94     | 0.837111 | 3        | 1.12     | 0.782964 |          |
| 253562_at   | At4g04000 | putative reverse transcriptase                                                      | non-LTR retrotransposon family (LINE)         | 33  | 44  | 40  | 45  | 58  | 42  | 39  | 48   | 0.81     | 0.184548 | 37       | 32  | 35  | 42  | 37  | 39  | 38   | 37       | 0.91     | 0.861419 | 39       | 0.89     | 0.096715 |          |
| 253563_x_at | At4g04010 | putative protein                                                                    | hypothetical protein                          | 65  | 107 | 105 | 104 | 98  | 103 | 100 | 0.85 | 0.973365 | 48       | 49       | 52  | 53  | 54  | 53  | 56  | 57   | 56       | 0.96     | 0.831829 | 57       | 0.98     | 0.817034 |          |
| 253564_x_at | At4g04020 | putative fibrillin - supported by full-length                                       | putative fibrillin - supported by full-length | 164 | 178 | 205 | 395 | 331 | 278 | 182 | 335  | 0.54     | 0.012967 | 200      | 243 | 254 | 602 | 420 | 352 | 333  | 334      | 0.57     | 0.043622 | 458      | 0.51     | 0.041845 |          |
| 253565_at   | At4g04040 | putative phosphofructokinase beta sub                                               | pyruvate-phosphate-fructose-6-phosphate 1-    | 208 | 329 | 351 | 266 | 318 | 249 | 295 | 277  | 1.06     | 0.736908 | 226      | 238 | 222 | 237 | 225 | 224 | 266  | 277      | 0.93     | 0.272816 | 229      | 1.00     | 0.904372 |          |
| 253566_x_at | At4g04050 | putative transposon protein                                                         | ovosi-like retrotransposon family // qyo      | 23  | 29  | 31  | 31  | 43  | 33  | 28  | 36   | 0.78     | 0.137843 | 17       | 20  | 20  | 21  | 17  | 22  | 17   | 18       | 1.00     | 0.953319 | 20       | 0.94     | 0.551708 |          |
| 253567_at   | At4g04060 | putative transposon protein                                                         | ovosi-like retrotransposon family // ovo      | 12  | 14  | 19  | 13  | 13  | 14  | 15  | 0.92 | 0.841972 | 12       | 15       | 13  | 14  | 16  | 17  | 14  | 13   | 14       | 0.92     | 0.420364 | 14       | 1.00     | 0.988916 |          |
| 253568_at   | At4g04070 | hypothetical protein                                                                | hypothetical protein // pseudogene, hvo       | 17  | 18  | 25  | 20  | 26  | 24  | 20  | 23   | 0.85     | 0.328153 | 12       | 19  | 18  | 11  | 14  | 13  | 17   | 16       | 1.34     | 0.206424 | 12       | 1.38     | 0.142832 |          |
| 253569_at   | At4g04080 | putative NiRu-like metallocluster assem                                             | iron-sulfur cluster assembly complex orc      | 26  | 32  | 47  | 41  | 38  | 39  | 35  | 40   | 0.88     | 0.497483 | 26       | 28  | 32  | 27  | 28  | 23  | 34   | 29       | 0.99     | 0.962030 | 26       | 1.11     | 0.279702 |          |
| 253570_at   | At4g04100 | putative protein                                                                    | CACCA-like transposase family (PttA/En)       | 12  | 14  | 18  | 18  | 17  | 19  | 15  | 18   | 0.81     | 0.126448 | 13       | 14  | 17  | 16  | 17  | 25  | 17   | 15       | 0.80     | 0.156677 | 17       | 0.88     | 0.216770 |          |
| 253571_at   | At4g04110 | putative RPP1-like disease resistance                                               | putative RPP1-like disease resistance         | 45  | 60  | 61  | 68  | 59  | 54  | 60  | 50   | 0.90     | 0.413621 | 36       | 31  | 44  | 37  | 32  | 34  | 37   | 41       | 1.02     | 0.840605 | 34       | 0.98     | 0.515354 |          |
| 253572_at   | At4g04120 | putative reverse transcriptase                                                      | copii-like retrotransposon family             | 57  | 57  | 75  | 75  | 70  | 77  | 63  | 74   | 0.86     | 0.178035 | 47       | 53  | 64  | 54  | 48  | 57  | 65   | 60       | 0.56     | 0.658100 | 53       | 1.02     | 0.827628 |          |
| 253573_x_at | At4g04130 | putative protein                                                                    | U1ot1 oreotase family protein // CACTA-I      | 43  | 58  | 50  | 56  | 72  | 63  | 50  | 64   | 0.79     | 0.098680 | 51       | 46  | 42  | 48  | 44  | 52  | 50   | 53       | 0.93     | 0.269154 | 48       | 0.96     | 0.577536 |          |
| 253574_at   | At4g04150 | putative transposon protein                                                         | ovosi-like retrotransposon family (Athlia)    | 9   | 9   | 9   | 9   | 10  | 8   | 9   | 9    | 0.95     | 0.645043 | 10       | 6   | 7   | 7   | 9   | 6   | 9    | 8        | 0.97     | 0.877471 | 8        | 0.92     | 0.683867 |          |
| 253575_at   | At4g04160 | hypothetical protein                                                                | pseudogene, hypothetical protein // hvo       | 19  | 21  | 20  | 28  | 30  | 23  | 23  | 27   | 0.87     | 0.425723 | 17       | 19  | 19  | 19  | 18  | 27  | 19   | 19       | 0.94     | 0.638968 | 19       | 1.03     | 0.684988 |          |
| 253576_at   | At4g04170 | putative protein                                                                    | CACCA-like transposase family (PttA/En)       | 20  | 24  | 32  | 25  | 23  | 24  | 25  | 0.99 | 0.973365 | 18       | 20       | 26  | 22  | 16  | 18  | 15  | 18   | 15       | 1.20     | 0.192163 | 19       | 1.13     | 0.452124 |          |
| 253577_at   | At4g04180 | putative vesicle transfer ATPase                                                    | AAA-type ATPase family protein                | 96  | 128 | 130 | 147 | 167 | 141 | 118 | 152  | 0.78     | 0.067297 | 114      | 103 | 119 | 159 | 136 | 118 | 125  | 121      | 1.12     | 0.322519 | 132      | 1.25     | 0.99     |          |
| 253578_at   | At4g04190 | hypothetical protein                                                                | expressed protein                             | 85  | 98  | 117 | 130 | 149 | 126 | 100 | 135  | 0.74     | 0.040618 | 97       | 94  | 110 | 156 | 122 | 113 | 132  | 105      | 1.00     | 0.885998 | 130      | 0.77     | 0.099398 |          |
| 253579_at   | At4g04220 | putative disease resistance protein sim                                             | disease resistance family protein             | 15  | 17  | 18  | 16  | 19  | 18  | 16  | 17   | 0.94     | 0.440500 | 8        | 12  | 14  | 11  | 11  | 11  | 11   | 11       | 0.98     | 0.862678 | 11       | 1.01     | 0.96785  |          |
| 253580_at   | At4g04230 | putative transposon protein                                                         | gypsy-like retrotransposon family             | 11  | 11  | 16  | 21  | 24  | 13  | 14  | 19   | 0.65     | 0.817832 | 126      | 129 | 156 | 177 | 154 | 145 | 163  | 153      | 0.97     | 0.153727 | 159      | 0.94     | 0.684988 |          |
| 253581_at   | At4g04260 | putative ES43-like protein                                                          | brmo-adjacent homolog (BAH) domain            | 34  | 48  | 57  | 56  | 65  | 64  | 46  | 62   | 0.75     | 0.102908 | 39       | 48  | 47  | 55  | 34  | 40  | 45   | 41       | 1.03     | 0.780477 | 43       | 1.03     | 0.850596 |          |
| 253582_at   | At4g04270 | putative protein                                                                    | CACCA-like transposase family (PttA/En)       | 18  | 25  | 29  | 31  | 28  | 31  | 24  | 30   | 0.80     | 0.152240 | 16       | 18  | 16  | 17  | 17  | 14  | 19   | 21       | 17       | 0.95     | 0.623005 | 16       | 1.05     | 0.561030 |
| 253583_at   | At4g04280 | putative transposon protein                                                         | copii-like retrotransposon family             | 21  | 22  | 28  | 27  | 29  | 26  | 24  | 27   | 0.87     | 0.216843 | 14       | 20  | 20  | 18  | 20  | 22  | 22   | 18       | 0.91     | 0.457532 | 18       | 1.00     | 0.994635 |          |
| 253584_x_at | At4g04290 | putative reverse transcriptase                                                      | copii-like retrotransposon family // copii    | 47  | 63  | 54  | 60  | 54  | 63  | 52  | 57   | 0.82     | 0.457532 | 54       | 50  | 43  | 56  | 61  | 53  | 1.02 | 0.827923 | 54       | 1.09     | 0.502724 |          |          |          |
| 253585_at   | At4g04210 | putative membrane trafficking factor                                                | UBX domain-containing protein                 | 270 | 326 | 315 | 415 | 426 | 368 | 304 | 403  | 0.75     | 0.015799 | 291      | 320 | 328 | 580 | 392 |     |      |          |          |          |          |          |          |          |

|             |           |                                                                                                |      |      |      |      |      |      |      |          |          |          |      |      |      |      |      |      |      |      |      |      |          |          |          |          |          |          |
|-------------|-----------|------------------------------------------------------------------------------------------------|------|------|------|------|------|------|------|----------|----------|----------|------|------|------|------|------|------|------|------|------|------|----------|----------|----------|----------|----------|----------|
| 253305_at   | Athg04770 | putative ABC transporter similar to Gui ATP-binding-cassette transporter ABC1                  | 289  | 451  | 455  | 526  | 523  | 430  | 398  | 493      | 0.81     | 0.208912 | 373  | 336  | 405  | 510  | 428  | 406  | 421  | 414  | 371  | 436  | 0.85     | 0.070015 | 448      | 0.83     | 0.111893 |          |
| 253306_at   | Athg04740 | putative calcium dependent protein kinase, putative                                            | 11   | 15   | 12   | 21   | 18   | 11   | 13   | 17       | 0.76     | 0.272124 | 8    | 9    | 8    | 9    | 8    | 10   | 10   | 11   | 11   | 8    | 10       | 0.80     | 0.002969 | 10       | 0.82     | 0.021950 |
| 253307_at   | Athg04900 | hyvothermal protein similar to A. thaliana c240                                                | 62   | 63   | 77   | 86   | 88   | 81   | 67   | 85       | 0.77     | 0.031605 | 44   | 48   | 54   | 56   | 52   | 49   | 56   | 48   | 49   | 52   | 0.93     | 0.250459 | 52       | 0.93     | 0.310443 |          |
| 253308_at   | Athg04910 | putative comorbid of vesicle-medial AAX-type AT7A family protein                               | 648  | 770  | 648  | 898  | 638  | 698  | 788  | 698      | 0.86     | 0.330939 | 498  | 411  | 532  | 498  | 598  | 498  | 598  | 598  | 598  | 598  | 0.81     | 0.063271 | 598      | 0.82     | 0.155638 |          |
| 253309_at   | Athg04920 | hyvothermal protein                                                                            | 109  | 124  | 172  | 171  | 166  | 143  | 135  | 160      | 0.85     | 0.030601 | 69   | 73   | 82   | 102  | 89   | 93   | 89   | 90   | 75   | 93   | 0.80     | 0.005302 | 95       | 0.78     | 0.019315 |          |
| 253310_at   | Athg04955 | Expressed protein ; supported by full-length amidehydrolase family protein                     | 132  | 202  | 286  | 228  | 265  | 189  | 207  | 227      | 0.91     | 0.696492 | 364  | 413  | 352  | 387  | 387  | 318  | 419  | 405  | 376  | 383  | 0.98     | 0.799810 | 364      | 1.03     | 0.703816 |          |
| 253276_at   | Athg04930 | putative fatty acid desaturase similar to A. thaliana c240                                     | 58   | 73   | 80   | 71   | 90   | 62   | 70   | 74       | 0.95     | 0.722839 | 56   | 46   | 60   | 54   | 48   | 54   | 53   | 63   | 54   | 54   | 0.99     | 0.914417 | 52       | 1.04     | 0.685287 |          |
| 253277_at   | Athg04980 | putative homodimeric protein ; supported by full-length leucine zipper protein                 | 1389 | 1682 | 1791 | 1682 | 1682 | 1682 | 1682 | 1682     | 0.86     | 0.167144 | 1607 | 1607 | 1386 | 1179 | 1386 | 1179 | 1386 | 1179 | 1386 | 1179 | 0.78     | 0.047529 | 1169     | 0.80     | 0.254563 |          |
| 253278_at   | Athg04940 | putative WD-repeat membrane protein ; transducin family protein / WD-40 repeat                 | 151  | 138  | 137  | 183  | 169  | 154  | 142  | 169      | 0.84     | 0.048234 | 106  | 90   | 111  | 140  | 120  | 99   | 146  | 125  | 102  | 128  | 0.80     | 0.097618 | 123      | 0.83     | 0.263684 |          |
| 253279_at   | Athg04950 | putative thioredoxin ; supported by cdi thioredoxin family protein / thioredoxin               | 397  | 440  | 495  | 518  | 571  | 453  | 444  | 514      | 0.86     | 0.190958 | 343  | 338  | 383  | 586  | 446  | 382  | 455  | 440  | 355  | 464  | 0.76     | 0.054631 | 471      | 0.75     | 0.133400 |          |
| 253280_at   | Athg04960 | score=170, E=5.7e-06, N=1                                                                      | 125  | 146  | 186  | 172  | 188  | 172  | 152  | 177      | 0.86     | 0.254435 | 151  | 160  | 151  | 199  | 166  | 150  | 215  | 182  | 154  | 182  | 0.84     | 0.118767 | 172      | 0.90     | 0.296958 |          |
| 253281_at   | Athg04970 | contains similarity to glucan synthase, callose synthase, cuticle / 1,3-beta-D-glucan synthase | 201  | 287  | 274  | 336  | 384  | 236  | 254  | 322      | 0.77     | 0.271612 | 149  | 121  | 164  | 182  | 156  | 135  | 159  | 154  | 145  | 158  | 0.92     | 0.372478 | 158      | 0.91     | 0.500798 |          |
| 253282_at   | Athg04980 | see GB:U05073 similar to a family of A hydroxylase-like glycoprotein family p                  | 14   | 19   | 27   | 20   | 23   | 25   | 20   | 23       | 0.89     | 0.007817 | 11   | 17   | 18   | 16   | 11   | 11   | 14   | 15   | 13   | 15   | 1.15     | 0.349491 | 13       | 1.20     | 0.302519 |          |
| 253283_at   | Athg04990 | contains similarity to Goeysylin hirsut, expressed protein                                     | 28   | 30   | 43   | 38   | 34   | 38   | 34   | 38       | 0.92     | 0.554841 | 25   | 21   | 30   | 31   | 24   | 24   | 27   | 25   | 25   | 26   | 0.96     | 0.688676 | 26       | 0.96     | 0.767405 |          |
| 253284_at   | Athg05000 | contains similarity to S. cerevisiae vacuole protein sorting-associated protein                | 168  | 237  | 217  | 221  | 266  | 203  | 208  | 230      | 0.90     | 0.464683 | 235  | 249  | 262  | 327  | 273  | 265  | 274  | 267  | 249  | 281  | 0.88     | 0.083678 | 288      | 0.86     | 0.130068 |          |
| 253285_at   | Athg05030 | hyvothermal protein                                                                            | 31   | 39   | 51   | 42   | 44   | 38   | 40   | 41       | 0.97     | 0.884742 | 32   | 35   | 35   | 37   | 29   | 31   | 32   | 31   | 34   | 32   | 1.07     | 0.302767 | 32       | 1.06     | 0.481232 |          |
| 253286_at   | Athg05070 | see GB:AC003952 similar to a family of F-box family protein                                    | 1066 | 1855 | 2099 | 1627 | 1602 | 872  | 1673 | 1241     | 1.35     | 0.314223 | 909  | 1127 | 764  | 915  | 798  | 903  | 1193 | 1190 | 933  | 1000 | 0.93     | 0.632845 | 872      | 1.07     | 0.614784 |          |
| 253287_at   | Athg05080 | score=526.5, E=1.9e-154, N=3 ; supoc polyubiquitin (UBQ11) / polyubiquitin (l                  | 23   | 22   | 29   | 24   | 27   | 31   | 25   | 27       | 0.90     | 0.398929 | 21   | 22   | 25   | 21   | 19   | 22   | 25   | 24   | 23   | 22   | 1.03     | 0.730253 | 21       | 1.11     | 0.233043 |          |
| 253288_at   | Athg05050 | score=526.5, E=1.9e-154, N=3 ; supoc polyubiquitin (UBQ11) / polyubiquitin (l                  | 415  | 442  | 585  | 717  | 747  | 629  | 481  | 698      | 0.69     | 0.026707 | 295  | 353  | 361  | 544  | 417  | 382  | 531  | 543  | 337  | 483  | 0.70     | 0.023749 | 448      | 0.75     | 0.106391 |          |
| 253289_at   | Athg05060 | contains similarity to Arabidopsis thaliana vacuole-associated membrane family pr              | 175  | 258  | 272  | 272  | 300  | 247  | 235  | 273      | 0.86     | 0.321385 | 234  | 276  | 247  | 369  | 253  | 272  | 269  | 287  | 252  | 290  | 0.87     | 0.235628 | 298      | 0.85     | 0.292050 |          |
| 253290_at   | Athg05020 | score=63.7, E=3.9e-15, N=8 ; succoat ankyrin repeat family protein                             | 111  | 127  | 173  | 127  | 153  | 118  | 137  | 133      | 1.03     | 0.857537 | 140  | 107  | 122  | 127  | 103  | 101  | 122  | 113  | 122  | 113  | 1.09     | 0.346531 | 111      | 1.11     | 0.377630 |          |
| 253291_at   | Athg05040 | score=63.7, E=3.9e-15, N=8 ; succoat ankyrin repeat family protein                             | 22   | 28   | 23   | 27   | 30   | 26   | 24   | 28       | 0.89     | 0.247787 | 20   | 24   | 27   | 24   | 21   | 19   | 25   | 30   | 24   | 24   | 0.99     | 0.414922 | 22       | 1.09     | 0.476735 |          |
| 253292_s_at | Athg05110 | putative protein equilibrative nucleoside equilibrative nucleoside transporter, out            | 85   | 118  | 159  | 70   | 69   | 57   | 121  | 65       | 1.85     | 0.062278 | 126  | 149  | 126  | 155  | 111  | 118  | 206  | 190  | 134  | 156  | 0.86     | 0.423507 | 128      | 1.05     | 0.723788 |          |
| 253293_at   | Athg05140 | putative protein equilibrative nucleoside equilibrative nucleoside transporter fami            | 42   | 45   | 60   | 53   | 54   | 60   | 49   | 56       | 0.88     | 0.333471 | 27   | 32   | 37   | 26   | 27   | 29   | 29   | 25   | 32   | 27   | 1.18     | 0.077881 | 27       | 1.17     | 0.188896 |          |
| 253294_at   | Athg05160 | 4-coumarate-CoA lyase - like protein - 4-coumarate-CoA lyase, putative / 4-co                  | 323  | 323  | 311  | 356  | 288  | 306  | 344  | 0.724932 | 260      | 231      | 271  | 332  | 286  | 246  | 288  | 276  | 254  | 286  | 288  | 0.89 | 0.167348 | 288      | 0.88     | 0.220254 |          |          |
| 253295_at   | Athg05170 | putative protein ethylene responsive E basic helix-loop-helix (bHLH) family pr                 | 19   | 19   | 25   | 20   | 25   | 25   | 21   | 23       | 0.89     | 0.371257 | 19   | 20   | 24   | 20   | 15   | 29   | 19   | 21   | 19   | 18   | 1.16     | 0.141140 | 18       | 1.15     | 0.294714 |          |
| 253296_at   | Athg05190 | kinase - like protein kinase like protein kinase-like protein A, putative                      | 201  | 251  | 208  | 257  | 294  | 232  | 220  | 261      | 0.84     | 0.161001 | 160  | 122  | 194  | 220  | 199  | 152  | 188  | 175  | 159  | 187  | 0.85     | 0.242843 | 190      | 0.83     | 0.339322 |          |
| 253297_at   | Athg05200 | receptor protein kinase - like protein re protein kinase family protein                        | 24   | 31   | 39   | 34   | 34   | 32   | 31   | 33       | 0.94     | 0.673411 | 24   | 27   | 29   | 26   | 25   | 27   | 28   | 29   | 27   | 27   | 0.98     | 0.753399 | 26       | 1.02     | 0.681684 |          |
| 253298_at   | Athg05210 | putative protein Lxxox, Brucella a bacterial transference hexapeptide repeat                   | 37   | 46   | 51   | 50   | 58   | 46   | 45   | 51       | 0.87     | 0.271402 | 41   | 39   | 36   | 50   | 44   | 44   | 49   | 45   | 39   | 46   | 0.83     | 0.008835 | 46       | 0.84     | 0.040878 |          |
| 253299_at   | Athg05230 | putative protein ubiquitin. Tetrahymena ubiquitin family protein                               | 22   | 31   | 48   | 41   | 38   | 45   | 34   | 38       | 0.94     | 0.078817 | 24   | 28   | 24   | 28   | 24   | 23   | 29   | 26   | 24   | 29   | 0.96     | 0.935758 | 24       | 0.94     | 0.610406 |          |
| 253300_at   | Athg05240 | putative protein various predicted prot pseudoenzyme, hyvothermal protein                      | 16   | 18   | 15   | 25   | 25   | 20   | 18   | 23       | 0.79     | 0.272643 | 18   | 18   | 20   | 16   | 17   | 18   | 18   | 22   | 18   | 18   | 1.26     | 0.209682 | 18       | 1.26     | 0.360593 |          |
| 253301_at   | Athg05250 | putative protein (ubiquitin like) to variou ubiquitin family protein                           | 10   | 14   | 13   | 12   | 15   | 11   | 12   | 13       | 0.98     | 0.908605 | 15   | 11   | 15   | 10   | 10   | 10   | 11   | 8    | 14   | 10   | 1.38     | 0.015010 | 10       | 1.37     | 0.030490 |          |
| 253302_at   | Athg05260 | putative protein (ubiquitin like) to variou ubiquitin family protein                           | 26   | 37   | 41   | 38   | 36   | 40   | 34   | 38       | 0.91     | 0.484145 | 29   | 45   | 46   | 37   | 30   | 29   | 39   | 36   | 40   | 34   | 1.17     | 0.281617 | 32       | 1.25     | 0.246740 |          |
| 253303_at   | Athg05270 | putative protein (ubiquitin like) to variou ubiquitin family protein                           | 12   | 13   | 17   | 11   | 14   | 14   | 16   | 14       | 0.84     | 0.04784  | 8    | 11   | 11   | 11   | 8    | 5    | 8    | 5    | 10   | 7    | 1.39     | 0.161602 | 8        | 1.29     | 0.359384 |          |
| 253304_at   | Athg05280 | putative protein various predicted prot pseudoenzyme, hyvothermal protein                      | 9    | 11   | 10   | 14   | 13   | 11   | 10   | 13       | 0.76     | 0.041802 | 6    | 18   | 10   | 9    | 10   | 8    | 9    | 8    | 12   | 9    | 1.29     | 0.366984 | 9        | 1.28     | 0.530167 |          |
| 253305_at   | Athg05300 | putative protein various predicted prot pseudoenzyme, hyvothermal protein                      | 38   | 37   | 51   | 48   | 54   | 44   | 42   | 48       | 0.87     | 0.310488 | 20   | 15   | 27   | 27   | 22   | 23   | 24   | 20   | 21   | 23   | 0.90     | 0.455004 | 24       | 0.86     | 0.432266 |          |
| 253306_at   | Athg05310 | putative protein various ubiquitin-like or ubiquitin family protein                            | 33   | 33   | 45   | 34   | 39   | 37   | 37   | 37       | 1.02     | 0.893527 | 25   | 26   | 29   | 26   | 23   | 26   | 26   | 26   | 27   | 25   | 1.05     | 0.292557 | 25       | 1.07     | 0.306268 |          |
| 253307_at   | Athg05180 | Oxyanion-evolving transfer protein 3 to oxyanion-evolving enhancer protein 3, chl              | 1185 | 1818 | 1825 | 2125 | 1567 | 1609 | 1881 | 0.86     | 0.367303 | 1798     | 2161 | 1626 | 2724 | 2253 | 2238 | 1961 | 2350 | 2353 | 2263 | 2403 | 0.83     | 0.036268 | 2403     | 0.82     | 0.092907 |          |
| 253308_at   | Athg05090 | 3/2,5-BISPHOSPHATE NUCLEOTIDE inositol monophosphatase family protein                          | 101  | 148  | 157  | 142  | 163  | 122  | 135  | 142      | 0.95     | 0.751273 | 112  | 116  | 118  | 147  | 109  | 137  | 123  | 116  | 125  | 0.92 | 0.382651 | 122      | 0.95     | 0.651829 |          |          |
| 253309_at   | Athg05100 | MYB - like protein cDNA M4 mvb transcrip tyb family transposon factor (MYB74)                  | 20   | 18   | 21   | 24   | 22   | 16   | 20   | 21       | 0.95     | 0.666370 | 16   | 21   | 14   | 18   | 16   | 16   | 15   | 16   | 17   | 1.04 | 0.703250 | 17       | 1.00     | 0.970022 |          |          |
| 253310_at   | Athg05320 | polyubiquitin (UBQ10) identical to GL18 polyubiquitin (UBQ10) (SEN3)                           | 1877 | 2166 | 2555 | 2592 | 2400 | 2500 | 2199 | 2498     | 0.88     | 0.217330 | 1124 | 1319 | 1463 | 1818 | 1214 | 1140 | 1970 | 1989 | 1302 | 1626 | 0.80     | 0.256377 | 1391     | 0.94     | 0.726865 |          |
| 253311_at   | Athg05150 | putative protein various predicted prot octocosaeside/PhoxBem10 (PB1) dom                      | 256  | 376  | 450  | 372  | 522  | 355  | 361  | 416      | 0.87     | 0.512746 | 300  | 311  | 232  | 399  | 357  | 342  | 411  | 193  | 281  | 379  | 0.74     | 0.007721 | 363      | 0.77     | 0.043963 |          |
| 253312_at   | Athg05340 | putative protein Mitochondrial ATPase                                                          | 29   | 49   | 50   | 75   | 63   | 79   | 46   | 83       | 0.55     | 0.024926 | 37   | 43   | 39   | 72   | 49   | 45   | 49   | 45   | 49   | 54   | 0.73     | 0.077775 | 55       | 0.77     | 0.238833 |          |
| 253313_at   | Athg05370 | putative protein predicted proteins, Are                                                       | 40   | 48   | 63   | 92   | 108  | 88   | 51   | 96       | 0.53     | 0.007395 | 55   | 64   | 57   | 110  | 78   | 80   | 67   | 68   | 59   | 68   | 0.74     | 0.081546 | 69       | 0.66     | 0.045446 |          |
| 253314_at   | Athg05400 | putative protein hyvothermal protein, A. expressed protein                                     | 263  | 330  | 325  | 381  | 410  | 364  | 306  | 385      | 0.79     | 0.036468 | 317  | 365  | 370  | 540  | 398  | 355  | 373  | 364  | 350  | 406  | 0.86     | 0.285914 | 431      | 0.81     | 0.240449 |          |
| 253315_at   | Athg05410 | U3 snRNP-associated -like protein U; transcribed family protein / WD-40 repeat                 | 283  | 323  | 366  | 415  | 405  | 365  | 324  | 395      | 0.82     | 0.063448 | 264  | 264  | 297  | 380  | 301  | 280  | 293  | 284  | 275  | 308  | 0.89     | 0.255953 | 320      | 0.86     | 0.236251 |          |
| 253316_at   | Athg05420 | UV-damaged DNA-binding factor - like UV-damaged DNA-binding protein, outa                      | 389  | 401  | 439  | 477  | 333  | 387  | 410  | 0.83     | 0.340398 | 475      | 369  | 439  | 289  | 236  | 193  | 232  | 246  | 239  | 189  | 236  | 0.89     | 0.070516 | 240      | 0.93     | 0.194687 |          |
| 253317_at   | Athg0544  |                                                                                                |      |      |      |      |      |      |      |          |          |          |      |      |      |      |      |      |      |      |      |      |          |          |          |          |          |          |

|             |          |                                       |                                                                            |     |     |     |     |     |     |     |      |          |          |     |     |     |     |     |     |     |     |     |      |          |          |      |          |          |
|-------------|----------|---------------------------------------|----------------------------------------------------------------------------|-----|-----|-----|-----|-----|-----|-----|------|----------|----------|-----|-----|-----|-----|-----|-----|-----|-----|-----|------|----------|----------|------|----------|----------|
| 255218_at   | A4g07700 | putative athlia transposon protein    | ovsps-like retrotransposon family (Athlia pseudogene, hypothetical protein | 6   | 8   | 11  | 8   | 8   | 10  | 8   | 9    | 0.96     | 0.829808 | 8   | 10  | 10  | 8   | 8   | 9   | 11  | 10  | 9   | 9    | 1.02     | 0.836123 | 8    | 1.16     | 0.121831 |
| 255219_at   | A4g07710 | hypothetical protein                  | ovsps-like retrotransposon family (Athlia pseudogene, hypothetical protein | 31  | 39  | 45  | 44  | 42  | 37  | 38  | 41   | 0.94     | 0.614328 | 31  | 31  | 38  | 30  | 9   | 31  | 35  | 34  | 34  | 32   | 1.05     | 0.461947 | 30   | 1.11     | 0.230588 |
| 255184_at   | A4g07730 | putative athlia transposon protein    | ovsps-like retrotransposon family (Athlia pseudogene, hypothetical protein | 8   | 6   | 6   | 5   | 8   | 6   | 6   | 7    | 0.99     | 0.947906 | 3   | 4   | 6   | 7   | 9   | 9   | 8   | 8   | 4   | 8    | 0.54     | 0.004455 | 8    | 0.53     | 0.028774 |
| 255185_at   | A4g07740 | putative athlia transposon protein    | ovsps-like retrotransposon family (Athlia pseudogene, hypothetical protein | 30  | 30  | 38  | 38  | 38  | 30  | 35  | 39   | 0.98     | 0.774300 | 33  | 34  | 36  | 36  | 32  | 31  | 45  | 36  | 32  | 31   | 0.96     | 0.716213 | 31   | 0.95     | 0.167686 |
| 255186_at   | A4g07750 | putative athlia transposon protein    | ovsps-like retrotransposon family (Athlia pseudogene, hypothetical protein | 31  | 30  | 43  | 39  | 42  | 34  | 35  | 38   | 0.90     | 0.473247 | 24  | 25  | 23  | 22  | 27  | 23  | 19  | 20  | 24  | 22   | 1.08     | 0.416663 | 24   | 0.99     | 0.861587 |
| 255187_s_at | A4g07760 | putative athlia transposon protein    | ovsps-like retrotransposon family (Athlia pseudogene, hypothetical protein | 6   | 5   | 14  | 7   | 6   | 9   | 8   | 8    | 1.09     | 0.824891 | 4   | 6   | 6   | 6   | 6   | 7   | 5   | 5   | 5   | 6    | 0.93     | 0.580653 | 6    | 0.85     | 0.242900 |
| 255156_at   | A4g07780 | putative athlia transposon protein    | ovsps-like retrotransposon family (Athlia pseudogene, hypothetical protein | 7   | 6   | 6   | 7   | 9   | 6   | 6   | 7    | 0.87     | 0.356050 | 6   | 17  | 7   | 8   | 9   | 9   | 8   | 10  | 8   | 1.18 | 0.594622 | 8        | 1.20 | 0.666812 |          |
| 255157_at   | A4g07790 | putative athlia transposon protein    | ovsps-like retrotransposon family (Athlia pseudogene, hypothetical protein | 16  | 23  | 24  | 24  | 27  | 22  | 24  | 25   | 0.93     | 0.668444 | 22  | 18  | 27  | 17  | 21  | 21  | 21  | 21  | 21  | 1.07 | 0.547603 | 16       | 1.15 | 0.266136 |          |
| 255158_s_at | A4g07800 | hypothetical protein                  | ovsps-like retrotransposon family (Athlia pseudogene, hypothetical protein | 6   | 4   | 5   | 5   | 6   | 6   | 5   | 5    | 0.92     | 0.548286 | 2   | 4   | 7   | 2   | 3   | 2   | 6   | 6   | 5   | 4    | 1.18     | 0.694542 | 2    | 1.88     | 0.243468 |
| 255159_at   | A4g07810 | putative polyprotein                  | ovsps-like retrotransposon family (Athlia pseudogene, hypothetical protein | 22  | 26  | 30  | 30  | 32  | 29  | 26  | 30   | 0.86     | 0.165248 | 17  | 20  | 22  | 21  | 21  | 19  | 19  | 24  | 20  | 21   | 0.94     | 0.449151 | 20   | 0.96     | 0.595894 |
| 255160_at   | A4g07820 | putative pathogenesis-related protein | ovsps-like retrotransposon family (Athlia pseudogene, hypothetical protein | 27  | 34  | 39  | 37  | 39  | 37  | 34  | 38   | 0.89     | 0.326288 | 22  | 34  | 30  | 30  | 24  | 29  | 26  | 24  | 28  | 27   | 1.06     | 0.590338 | 28   | 1.02     | 0.894787 |
| 255161_at   | A4g07830 | putative reverse transcriptase        | ovsps-like retrotransposon family (Athlia pseudogene, hypothetical protein | 11  | 7   | 21  | 6   | 7   | 9   | 13  | 7    | 1.77     | 0.250992 | 2   | 5   | 12  | 5   | 12  | 5   | 9   | 4   | 6   | 6    | 1.07     | 0.862782 | 6    | 1.13     | 0.824684 |
| 255162_at   | A4g07840 | putative transposon protein           | ovsps-like retrotransposon family (Athlia pseudogene, hypothetical protein | 10  | 11  | 17  | 12  | 16  | 12  | 13  | 13   | 0.96     | 0.833919 | 9   | 6   | 10  | 8   | 10  | 8   | 10  | 8   | 10  | 0.80 | 0.256088 | 10       | 0.77 | 0.286754 |          |
| 255163_at   | A4g07850 | putative polyprotein                  | ovsps-like retrotransposon family (Athlia pseudogene, hypothetical protein | 13  | 9   | 11  | 9   | 14  | 12  | 11  | 11   | 0.97     | 0.881387 | 6   | 7   | 8   | 8   | 6   | 6   | 7   | 8   | 7   | 7    | 0.99     | 0.941041 | 7    | 1.04     | 0.781742 |
| 255164_at   | A4g07880 | hypothetical protein                  | ovsps-like retrotransposon family (Athlia pseudogene, hypothetical protein | 26  | 32  | 25  | 23  | 33  | 31  | 28  | 29   | 0.96     | 0.751530 | 23  | 36  | 33  | 23  | 27  | 51  | 25  | 25  | 31  | 30   | 1.02     | 0.945738 | 33   | 0.92     | 0.790468 |
| 255165_at   | A4g07890 | putative protein                      | ovsps-like retrotransposon family (Athlia pseudogene, hypothetical protein | 13  | 15  | 18  | 20  | 16  | 18  | 15  | 18   | 0.84     | 0.185578 | 14  | 17  | 21  | 18  | 13  | 12  | 23  | 12  | 17  | 16   | 1.09     | 0.603100 | 15   | 1.18     | 0.418421 |
| 255166_at   | A4g07900 | putative protein                      | ovsps-like retrotransposon family (Athlia pseudogene, hypothetical protein | 23  | 28  | 29  | 32  | 28  | 24  | 22  | 25   | 0.85     | 0.327135 | 16  | 18  | 21  | 13  | 14  | 16  | 19  | 16  | 17  | 0.96 | 0.733042 | 15       | 1.07 | 0.650135 |          |
| 255167_at   | A4g07920 | putative protein                      | ovsps-like retrotransposon family (Athlia pseudogene, hypothetical protein | 9   | 18  | 17  | 17  | 16  | 15  | 15  | 16   | 0.92     | 0.673347 | 11  | 10  | 8   | 14  | 12  | 9   | 14  | 10  | 10  | 12   | 0.83     | 0.207392 | 12   | 0.84     | 0.282512 |
| 255168_at   | A4g07930 | putative protein                      | ovsps-like retrotransposon family (Athlia pseudogene, hypothetical protein | 21  | 23  | 21  | 25  | 25  | 23  | 22  | 22   | 0.90     | 0.069084 | 14  | 19  | 12  | 14  | 16  | 17  | 16  | 13  | 15  | 15   | 1.00     | 0.985919 | 16   | 0.97     | 0.848778 |
| 255169_x_at | A4g07940 | hypothetical protein                  | ovsps-like retrotransposon family (Athlia pseudogene, hypothetical protein | 81  | 112 | 104 | 132 | 129 | 115 | 99  | 125  | 0.79     | 0.068881 | 132 | 117 | 122 | 179 | 125 | 131 | 111 | 124 | 124 | 134  | 0.92     | 0.529297 | 145  | 0.85     | 0.290636 |
| 255170_at   | A4g07970 | hypothetical protein                  | ovsps-like retrotransposon family (Athlia pseudogene, hypothetical protein | 7   | 6   | 6   | 4   | 7   | 3   | 6   | 5    | 1.35     | 0.257086 | 7   | 8   | 7   | 5   | 5   | 4   | 8   | 5   | 7   | 5    | 1.37     | 0.077987 | 5    | 1.59     | 0.010345 |
| 255171_at   | A4g07990 | hypothetical protein                  | ovsps-like retrotransposon family (Athlia pseudogene, hypothetical protein | 88  | 86  | 109 | 115 | 93  | 85  | 105 | 88   | 0.81     | 0.111091 | 93  | 105 | 115 | 144 | 124 | 114 | 95  | 100 | 104 | 115  | 0.90     | 0.416158 | 127  | 0.82     | 0.103304 |
| 255172_x_at | A4g08000 | putative transposon protein           | ovsps-like retrotransposon family (Athlia pseudogene, hypothetical protein | 18  | 27  | 29  | 32  | 24  | 25  | 28  | 0.88 | 0.044133 | 15       | 18  | 20  | 19  | 18  | 16  | 18  | 18  | 18  | 18  | 1.00 | 0.973441 | 18       | 1.01 | 0.906547 |          |
| 255173_at   | A4g08020 | putative transposon protein           | ovsps-like retrotransposon family (Athlia pseudogene, hypothetical protein | 27  | 31  | 35  | 37  | 35  | 30  | 31  | 34   | 0.92     | 0.394969 | 22  | 23  | 30  | 25  | 103 | 116 | 23  | 20  | 25  | 25   | 1.11     | 0.342334 | 22   | 1.12     | 0.427449 |
| 255174_at   | A4g08030 | putative protein                      | ovsps-like retrotransposon family (Athlia pseudogene, hypothetical protein | 12  | 8   | 10  | 13  | 17  | 12  | 10  | 14   | 0.73     | 0.114868 | 11  | 13  | 8   | 12  | 10  | 13  | 18  | 13  | 11  | 13   | 0.80     | 0.243018 | 12   | 0.90     | 0.516460 |
| 255175_at   | A4g07960 | putative glucosyltransferase          | ovsps-like retrotransposon family (Athlia pseudogene, hypothetical protein | 162 | 162 | 192 | 188 | 228 | 153 | 172 | 190  | 0.90     | 0.481484 | 106 | 100 | 98  | 130 | 108 | 126 | 151 | 134 | 102 | 127  | 0.80     | 0.061780 | 116  | 0.87     | 0.147615 |
| 255176_s_at | A4g07950 | putative DNA-directed RNA polymerase  | ovsps-like retrotransposon family (Athlia pseudogene, hypothetical protein | 339 | 501 | 495 | 456 | 555 | 409 | 445 | 473  | 0.94     | 0.700287 | 555 | 574 | 581 | 719 | 594 | 628 | 549 | 616 | 570 | 621  | 0.92     | 0.224786 | 647  | 0.88     | 0.114560 |
| 255177_at   | A4g08040 | putative protein                      | ovsps-like retrotransposon family (Athlia pseudogene, hypothetical protein | 30  | 35  | 43  | 36  | 44  | 43  | 36  | 41   | 0.88     | 0.317315 | 29  | 32  | 37  | 34  | 26  | 34  | 29  | 32  | 33  | 31   | 1.05     | 0.593443 | 31   | 1.04     | 0.745926 |
| 255178_at   | A4g08050 | putative protein                      | ovsps-like retrotransposon family (Athlia pseudogene, hypothetical protein | 8   | 7   | 7   | 5   | 8   | 8   | 6   | 1.33 | 0.054046 | 5        | 6   | 8   | 5   | 6   | 4   | 5   | 5   | 7   | 5   | 1.35 | 0.246055 | 5        | 1.23 | 0.175905 |          |
| 255179_at   | A4g08090 | putative protein                      | ovsps-like retrotransposon family (Athlia pseudogene, hypothetical protein | 23  | 31  | 35  | 32  | 33  | 23  | 31  | 35   | 0.89     | 0.473314 | 24  | 19  | 24  | 24  | 24  | 24  | 24  | 21  | 23  | 24   | 0.91     | 0.426988 | 22   | 0.94     | 0.069013 |
| 255180_at   | A4g08100 | putative polyprotein                  | ovsps-like retrotransposon family (Athlia pseudogene, hypothetical protein | 2   | 2   | 0   | 2   | 1   | 1   | 1   | 1    | 0.86     | 0.767397 | 3   | 3   | 1   | 3   | 3   | 3   | 3   | 2   | 2   | 2    | 0.98     | 0.928765 | 2    | 0.99     | 0.960618 |
| 255181_at   | A4g08110 | predicted protein of unknown function | ovsps-like retrotransposon family (Athlia pseudogene, hypothetical protein | 29  | 42  | 35  | 40  | 45  | 39  | 36  | 41   | 0.86     | 0.341439 | 31  | 25  | 39  | 34  | 29  | 27  | 37  | 32  | 32  | 32   | 1.01     | 0.962248 | 30   | 1.06     | 0.693821 |
| 255182_at   | A4g08130 | hypothetical protein                  | ovsps-like retrotransposon family (Athlia pseudogene, hypothetical protein | 29  | 42  | 44  | 37  | 41  | 40  | 39  | 39   | 0.86     | 0.905058 | 26  | 30  | 35  | 33  | 29  | 30  | 30  | 29  | 30  | 30   | 1.01     | 0.897153 | 31   | 1.00     | 0.966833 |
| 255183_at   | A4g08140 | hypothetical protein                  | ovsps-like retrotransposon family (Athlia pseudogene, hypothetical protein | 22  | 23  | 28  | 29  | 32  | 28  | 24  | 29   | 0.81     | 0.237135 | 16  | 18  | 21  | 13  | 14  | 16  | 19  | 16  | 17  | 15   | 1.15     | 0.204017 | 14   | 1.28     | 0.056512 |
| 255149_at   | A4g08150 | KNAT1 homeobox-like protein           | ovsps-like retrotransposon family (Athlia pseudogene, hypothetical protein | 24  | 55  | 21  | 37  | 34  | 29  | 33  | 33   | 1.00     | 0.991673 | 15  | 14  | 20  | 22  | 21  | 18  | 19  | 14  | 16  | 19   | 0.85     | 0.270348 | 21   | 0.78     | 0.118370 |
| 255150_at   | A4g08160 | putative xylan endohydrolase          | ovsps-like retrotransposon family (Athlia pseudogene, hypothetical protein | 48  | 68  | 92  | 78  | 77  | 95  | 69  | 83   | 0.83     | 0.377867 | 64  | 75  | 76  | 84  | 57  | 65  | 102 | 78  | 71  | 77   | 0.92     | 0.588690 | 69   | 1.03     | 0.801621 |
| 255151_at   | A4g08180 | putative protein                      | ovsps-like retrotransposon family (Athlia pseudogene, hypothetical protein | 88  | 97  | 102 | 119 | 132 | 106 | 96  | 119  | 0.80     | 0.054999 | 83  | 71  | 87  | 101 | 95  | 73  | 111 | 99  | 80  | 86   | 0.84     | 0.143203 | 89   | 0.90     | 0.401836 |
| 255152_at   | A4g08190 | Rab-like protein Rab11 protein        | ovsps-like retrotransposon family (Athlia pseudogene, hypothetical protein | 4   | 4   | 2   | 6   | 4   | 4   | 6   | 5    | 0.84     | 0.595350 | 4   | 2   | 7   | 4   | 5   | 7   | 4   | 5   | 2   | 7    | 0.85     | 0.013412 | 6    | 0.45     | 0.047785 |
| 255153_at   | A4g08210 | putative protein                      | ovsps-like retrotransposon family (Athlia pseudogene, hypothetical protein | 28  | 38  | 40  | 51  | 48  | 41  | 35  | 47   | 0.75     | 0.064337 | 27  | 25  | 36  | 36  | 35  | 28  | 36  | 33  | 30  | 34   | 0.88     | 0.268594 | 33   | 0.90     | 0.485389 |
| 255154_at   | A4g08220 | putative protein                      | ovsps-like retrotransposon family (Athlia pseudogene, hypothetical protein | 169 | 230 | 245 | 270 | 281 | 219 | 215 | 257  | 0.84     | 0.237337 | 223 | 232 | 231 | 337 | 259 | 251 | 265 | 254 | 229 | 273  | 0.84     | 0.086880 | 282  | 0.81     | 0.125564 |
| 255155_at   | A4g08230 | hypothetical protein                  | ovsps-like retrotransposon family (Athlia pseudogene, hypothetical protein | 18  | 25  | 24  | 21  | 30  | 20  | 22  | 24   | 0.95     | 0.762252 | 18  | 14  | 20  | 20  | 15  | 9   | 13  | 15  | 17  | 14   | 1.22     | 0.318841 | 15   | 1.19     | 0.510833 |
| 255125_at   | A4g08250 | putative protein                      | ovsps-like retrotransposon family (Athlia pseudogene, hypothetical protein | 52  | 67  | 66  | 85  | 65  | 67  | 64  | 73   | 0.86     | 0.376820 | 44  | 44  | 42  | 52  | 47  | 43  | 58  | 46  | 44  | 44   | 0.89     | 0.315434 | 47   | 0.92     | 0.258801 |
| 255126_at   | A4g08270 | putative protein                      | ovsps-like retrotransposon family (Athlia pseudogene, hypothetical protein | 18  | 19  | 18  | 17  | 19  | 18  | 18  | 18   | 0.95     | 0.537616 | 14  | 16  | 20  | 15  | 12  | 13  | 14  | 15  | 15  | 15   | 1.12     | 0.394411 | 14   | 1.04     | 0.175207 |
| 255127_at   | A4g08300 | putative protein                      | ovsps-like retrotransposon family (Athlia pseudogene, hypothetical protein | 17  | 20  | 23  | 24  | 25  | 28  | 20  | 26   | 0.79     | 0.063065 | 19  | 17  | 21  | 25  | 16  | 19  | 16  | 19  | 19  | 19   | 1.01     | 0.942454 | 20   | 0.96     | 0.770909 |
| 255128_at   | A4g08310 | putative protein                      | ovsps-like retrotransposon family (Athlia pseudogene, hypothetical protein | 276 | 379 | 352 | 401 | 422 | 373 | 336 | 399  | 0.84     | 0.136483 | 304 | 380 | 357 | 531 | 393 | 347 | 380 | 377 | 347 | 405  | 0.86     | 0.257110 | 424  | 0.82     | 0.269041 |
| 255129_at   | A4g08320 | putative protein                      | ovsps-like retrotransposon family (Athlia pseudogene, hypothetical protein | 378 | 389 | 352 | 411 | 422 | 373 | 336 | 399  | 0.84     | 0.136483 | 304 | 380 | 357 | 531 | 393 | 347 | 380 | 377 | 347 | 405  | 0.86     | 0.257110 | 424  | 0.82     | 0.269041 |
| 255130_at   | A4g08330 | putative protein                      | ovsps-like retrotransposon family (Athlia pseudogene, hypothetical protein | 378 | 389 | 352 | 411 | 422 | 373 | 336 | 399  | 0.84     | 0.136483 | 304 | 380 | 357 | 531 | 393 | 347 | 380 | 377 | 347 | 405  | 0.86     | 0.257110 | 424  | 0.82     | 0.269041 |
| 255131_at   | A4g08340 | putative protein                      | ovsps-like retrotransposon family (Athlia pseudogene, hypothetical protein | 378 | 389 | 352 | 411 | 422 | 373 | 336 | 399  | 0.84     | 0.136483 | 304 | 380 | 357 | 531 | 393 | 347 | 380 | 377 | 347 | 405  | 0.86     |          |      |          |          |

|             |          |                                                 |                                                 |      |      |      |      |      |      |      |      |          |          |      |      |      |      |      |      |      |      |      |      |          |          |      |          |          |
|-------------|----------|-------------------------------------------------|-------------------------------------------------|------|------|------|------|------|------|------|------|----------|----------|------|------|------|------|------|------|------|------|------|------|----------|----------|------|----------|----------|
| 255062_at   | A4g08940 | hypothetical protein                            | expressed protein                               | 74   | 102  | 100  | 124  | 126  | 100  | 92   | 117  | 0.79     | 0.113492 | 93   | 93   | 98   | 155  | 117  | 114  | 117  | 107  | 95   | 122  | 0.78     | 0.049923 | 129  | 0.74     | 0.059514 |
| 255063_at   | A4g08970 | putative transposon protein similar to m        | Mutator-like transposase family                 | 18   | 21   | 25   | 27   | 27   | 24   | 21   | 26   | 0.82     | 0.113715 | 18   | 23   | 20   | 19   | 16   | 19   | 32   | 22   | 21   | 22   | 0.95     | 0.779461 | 18   | 1.13     | 0.232734 |
| 255064_at   | A4g08950 | putative protein similar to arabinose-induc     | c-phosphate-responsive protein, putative        | 2741 | 1683 | 2668 | 1579 | 2455 | 1310 | 2367 | 1782 | 1.33     | 0.204245 | 2358 | 2916 | 1835 | 2315 | 1647 | 1792 | 2173 | 2280 | 2370 | 2042 | 1.16     | 0.302886 | 1918 | 1.24     | 0.219142 |
| 255065_s_at | A4g08960 | putative protein similar to arabinose-induc     | e-phosphate-responsive protein, putative        | 267  | 352  | 565  | 287  | 518  | 333  | 286  | 577  | 0.50     | 0.091688 | 257  | 382  | 260  | 390  | 588  | 445  | 632  | 692  | 547  | 588  | 0.57     | 0.07304  | 588  | 0.40     | 0.088120 |
| 255066_at   | A4g08980 | F-box protein. AFBW2 contains F-box family      | (FBW2)                                          | 609  | 863  | 823  | 948  | 954  | 771  | 765  | 891  | 0.86     | 0.272804 | 714  | 725  | 766  | 1113 | 870  | 844  | 850  | 840  | 735  | 921  | 0.80     | 0.088247 | 969  | 0.76     | 0.107748 |
| 255067_at   | A4g08960 | putative phosphotyrosyl phosphatase a           | phosphotyrosyl phosphatase activator (f         | 384  | 510  | 527  | 608  | 630  | 529  | 474  | 589  | 0.80     | 0.102827 | 431  | 391  | 429  | 658  | 488  | 470  | 558  | 525  | 417  | 540  | 0.77     | 0.034800 | 539  | 0.77     | 0.117484 |
| 255068_at   | A4g08920 | Arabidopsis thaliana flavin-type blue-li        | cryptochrome 1 apoprotein (CRY1) / flav         | 181  | 271  | 238  | 247  | 268  | 188  | 230  | 234  | 0.98     | 0.105466 | 195  | 169  | 200  | 262  | 225  | 224  | 267  | 253  | 188  | 246  | 0.76     | 0.060302 | 237  | 0.79     | 0.037016 |
| 255069_s_at | A4g08990 | Mitochondrial RNA-methyltransferase (M          | isoamylase-like protein or isoamylase, putative | 48   | 51   | 55   | 61   | 67   | 44   | 50   | 55   | 0.59     | 0.081329 | 35   | 48   | 40   | 41   | 35   | 29   | 29   | 29   | 29   | 29   | 1.46     | 0.010103 | 29   | 0.58     | 0.031463 |
| 255070_at   | A4g09020 | isoamylase-like protein or isoamylase, putative | / starch debranchin                             | 259  | 295  | 331  | 403  | 559  | 412  | 295  | 458  | 0.64     | 0.040559 | 322  | 307  | 301  | 373  | 371  | 301  | 430  | 426  | 312  | 382  | 0.82     | 0.077621 | 348  | 0.90     | 0.215558 |
| 255071_at   | A4g09050 | putative protein or isoamylase, putative        | / starch debranchin                             | 48   | 91   | 86   | 65   | 72   | 55   | 75   | 64   | 1.17     | 0.485208 | 63   | 107  | 78   | 98   | 76   | 81   | 81   | 82   | 83   | 84   | 0.99     | 0.929110 | 85   | 0.97     | 0.883458 |
| 255072_at   | A4g09080 | outer envelope membrane protein OE1             | chloroplast outer membrane protein, out         | 82   | 102  | 91   | 106  | 97   | 84   | 98   | 0.86 | 0.258477 | 75       | 85   | 80   | 91   | 69   | 76   | 94   | 91   | 74   | 84   | 0.88 | 0.221111 | 79       | 0.94 | 0.594484 |          |
| 255073_at   | A4g09090 | putative protein or isoamylase, putative        | / starch debranchin                             | 19   | 15   | 10   | 11   | 10   | 9    | 20   | 1.98 | 0.030510 | 52       | 58   | 48   | 6    | 6    | 6    | 6    | 6    | 10   | 53   | 8    | 6.94     | 0.000001 | 7    | 7.51     | 0.000068 |
| 255074_at   | A4g09100 | putative protein or isoamylase, putative        | / starch debranchin                             | 15   | 17   | 22   | 19   | 20   | 18   | 19   | 0.94 | 0.040003 | 14       | 14   | 16   | 14   | 13   | 15   | 16   | 15   | 15   | 14   | 1.03 | 0.874287 | 14       | 1.09 | 0.294315 |          |
| 255075_at   | A4g09110 | putative protein or isoamylase, putative        | / starch debranchin                             | 17   | 19   | 17   | 21   | 22   | 18   | 18   | 20   | 0.87     | 0.132472 | 13   | 18   | 22   | 18   | 15   | 16   | 16   | 22   | 18   | 17   | 1.03     | 0.842788 | 16   | 1.10     | 0.584236 |
| 255076_at   | A4g09130 | putative protein or isoamylase, putative        | / starch debranchin                             | 14   | 17   | 19   | 22   | 20   | 22   | 17   | 21   | 0.81     | 0.058792 | 12   | 12   | 19   | 15   | 14   | 13   | 18   | 17   | 15   | 15   | 0.95     | 0.719699 | 14   | 1.04     | 0.814556 |
| 255077_at   | A4g09150 | putative protein or isoamylase, putative        | / starch debranchin                             | 453  | 629  | 571  | 660  | 829  | 551  | 551  | 680  | 0.81     | 0.250227 | 369  | 365  | 421  | 495  | 391  | 351  | 466  | 458  | 385  | 432  | 0.89     | 0.257079 | 412  | 0.93     | 0.589094 |
| 255078_at   | A4g09010 | putative protein or isoamylase, putative        | / starch debranchin                             | 280  | 557  | 438  | 383  | 457  | 307  | 425  | 382  | 1.11     | 0.664311 | 402  | 463  | 449  | 592  | 457  | 471  | 528  | 494  | 438  | 502  | 0.87     | 0.067641 | 497  | 0.88     | 0.195370 |
| 255079_s_at | A4g09000 | 14-3-3 protein GF14ci (rfr1) identical          | 14-3-3 protein GF14 oh (GRF4) /// 14-3          | 1498 | 2127 | 2086 | 2705 | 2837 | 2491 | 2054 | 2677 | 0.77     | 0.005492 | 2159 | 2222 | 2407 | 3121 | 2552 | 2241 | 2580 | 2481 | 2262 | 2595 | 0.87     | 0.147468 | 2638 | 0.86     | 0.234059 |
| 255080_at   | A4g09030 | arabinogalactan protein homolog arab            | arabinogalactan-protein (AGP10)                 | 1211 | 841  | 1329 | 1065 | 968  | 841  | 1127 | 958  | 1.18     | 0.352208 | 1501 | 1775 | 1372 | 1833 | 1271 | 1181 | 2073 | 2009 | 1549 | 1673 | 0.93     | 0.650399 | 1428 | 1.08     | 0.635524 |
| 255081_at   | A4g09140 | MLH1 protein - supported by cDNA; a             | DNA mismatch repair protein MLH1 (ML            | 137  | 183  | 165  | 201  | 208  | 149  | 162  | 186  | 0.87     | 0.343258 | 113  | 94   | 118  | 157  | 122  | 110  | 143  | 128  | 108  | 135  | 0.80     | 0.074505 | 130  | 0.84     | 0.248628 |
| 255082_at   | A4g09160 | putative protein polyphosphoinositide           | 1 SEC14 cytosolic factor family protein / p     | 232  | 324  | 295  | 326  | 380  | 290  | 294  | 332  | 0.85     | 0.271174 | 96   | 75   | 105  | 172  | 137  | 106  | 110  | 106  | 89   | 126  | 0.70     | 0.085070 | 138  | 0.64     | 0.074922 |
| 255083_s_at | A4g09230 | hypothetical protein                            | Ulp1 protease family protein                    | 7    | 7    | 9    | 10   | 10   | 8    | 9    | 0.81 | 0.052846 | 11       | 20   | 11   | 7    | 7    | 7    | 7    | 9    | 6    | 14   | 7    | 1.92     | 0.034881 | 7    | 1.98     | 0.103677 |
| 255084_s_at | A4g09270 | putative protein or isoamylase, putative        | / starch debranchin                             | 15   | 19   | 24   | 26   | 24   | 19   | 23   | 0.83 | 0.292778 | 15       | 13   | 14   | 15   | 12   | 15   | 17   | 14   | 14   | 15   | 0.95 | 0.563345 | 14       | 1.00 | 0.975469 |          |
| 255085_at   | A4g09290 | putative protein or isoamylase, putative        | / starch debranchin                             | 7    | 7    | 5    | 8    | 8    | 9    | 6    | 0.80 | 0.093865 | 7        | 9    | 7    | 8    | 5    | 7    | 7    | 3    | 8    | 6    | 1.32 | 0.173341 | 7        | 1.17 | 0.302498 |          |
| 255086_at   | A4g09300 | putative protein or isoamylase, putative        | / starch debranchin                             | 17   | 23   | 17   | 27   | 32   | 27   | 22   | 29   | 0.78     | 0.130946 | 11   | 12   | 18   | 17   | 15   | 11   | 14   | 14   | 14   | 14   | 0.96     | 0.791882 | 14   | 0.95     | 0.625253 |
| 255087_at   | A4g09330 | putative protein or isoamylase, putative        | / starch debranchin                             | 181  | 238  | 251  | 277  | 338  | 219  | 224  | 278  | 0.80     | 0.249600 | 247  | 208  | 255  | 328  | 301  | 254  | 288  | 280  | 237  | 290  | 0.82     | 0.032971 | 294  | 0.80     | 0.090637 |
| 255088_at   | A4g09350 | putative protein or isoamylase, putative        | / starch debranchin                             | 19   | 35   | 30   | 38   | 34   | 32   | 28   | 34   | 0.82     | 0.277303 | 22   | 25   | 26   | 36   | 26   | 27   | 28   | 25   | 24   | 29   | 0.85     | 0.158914 | 30   | 0.81     | 0.168120 |
| 255089_at   | A4g09320 | nucleoside-diphosphate kinase - supco           | nucleoside diphosphate kinase 1 (NDK1)          | 4832 | 5147 | 5502 | 5630 | 5946 | 5419 | 5160 | 5665 | 0.91     | 0.110228 | 4995 | 4983 | 5364 | 6123 | 5584 | 4866 | 5584 | 5742 | 5114 | 5580 | 0.92     | 0.155629 | 5524 | 0.93     | 0.346996 |
| 255090_at   | A4g09360 | putative protein or isoamylase, putative        | / starch debranchin                             | 8    | 12   | 12   | 17   | 13   | 14   | 11   | 15   | 0.74     | 0.093731 | 9    | 8    | 14   | 9    | 15   | 13   | 14   | 10   | 12   | 0.86 | 0.442281 | 12       | 0.85 | 0.514139 |          |
| 255091_at   | A4g09380 | putative protein or isoamylase, putative        | / starch debranchin                             | 11   | 11   | 11   | 11   | 11   | 11   | 11   | 11   | 0.79     | 0.078769 | 11   | 11   | 11   | 11   | 11   | 11   | 11   | 11   | 11   | 11   | 1.23     | 0.942717 | 11   | 1.21     | 0.108088 |
| 255092_s_at | A4g09400 | putative protein or isoamylase, putative        | / starch debranchin                             | 13   | 12   | 18   | 11   | 16   | 12   | 14   | 13   | 1.09     | 0.672738 | 15   | 11   | 9    | 11   | 6    | 11   | 10   | 9    | 12   | 9    | 1.25     | 0.244583 | 9    | 1.28     | 0.363164 |
| 255093_at   | A4g09410 | putative protein or isoamylase, putative        | / starch debranchin                             | 55   | 68   | 64   | 68   | 70   | 55   | 62   | 64   | 0.97     | 0.749596 | 60   | 49   | 58   | 62   | 50   | 63   | 68   | 62   | 56   | 61   | 0.91     | 0.311736 | 58   | 0.95     | 0.651135 |
| 255094_at   | A4g09420 | putative protein or isoamylase, putative        | / starch debranchin                             | 47   | 59   | 51   | 56   | 57   | 48   | 55   | 58   | 0.88     | 0.347074 | 34   | 42   | 42   | 41   | 35   | 33   | 43   | 41   | 39   | 39   | 1.02     | 0.850686 | 36   | 1.08     | 0.476708 |
| 255095_at   | A4g09430 | putative protein or isoamylase, putative        | / starch debranchin                             | 22   | 34   | 34   | 34   | 33   | 36   | 27   | 34   | 0.81     | 0.261244 | 24   | 24   | 33   | 28   | 26   | 48   | 32   | 26   | 40   | 0.92 | 0.603019 | 25       | 0.97 | 0.616320 |          |
| 255092_x_at | A4g09470 | hypothetical protein                            | hypothetical protein                            | 90   | 132  | 195  | 8    | 9    | 8    | 139  | 8    | 17.24    | 0.127174 | 611  | 796  | 655  | 14   | 12   | 28   | 13   | 12   | 687  | 16   | 43.49    | 0.000003 | 18   | 38.51    | 0.000284 |
| 255030_at   | A4g09480 | putative protein or isoamylase, putative        | / starch debranchin                             | 15   | 20   | 24   | 19   | 19   | 23   | 19   | 21   | 0.94     | 0.666990 | 17   | 21   | 20   | 23   | 14   | 17   | 23   | 17   | 19   | 19   | 1.03     | 0.809103 | 18   | 1.08     | 0.628502 |
| 255031_at   | A4g09490 | putative protein or isoamylase, putative        | / starch debranchin                             | 76   | 105  | 102  | 113  | 117  | 102  | 94   | 111  | 0.85     | 0.189600 | 105  | 126  | 127  | 191  | 148  | 135  | 158  | 162  | 119  | 159  | 0.75     | 0.025663 | 158  | 0.75     | 0.101479 |
| 255032_at   | A4g09500 | putative protein or isoamylase, putative        | / starch debranchin                             | 43   | 48   | 54   | 104  | 103  | 43   | 48   | 103  | 0.57     | 0.020650 | 55   | 71   | 59   | 141  | 93   | 90   | 127  | 101  | 62   | 110  | 0.56     | 0.012010 | 148  | 0.57     | 0.053217 |
| 255033_at   | A4g09520 | putative protein or isoamylase, putative        | / starch debranchin                             | 165  | 202  | 205  | 238  | 258  | 203  | 191  | 233  | 0.82     | 0.108661 | 205  | 180  | 216  | 289  | 253  | 235  | 252  | 232  | 200  | 248  | 0.81     | 0.042438 | 252  | 0.80     | 0.103038 |
| 255034_at   | A4g09540 | putative protein or isoamylase, putative        | / starch debranchin                             | 23   | 27   | 33   | 31   | 39   | 27   | 28   | 32   | 0.86     | 0.367878 | 18   | 20   | 13   | 30   | 18   | 17   | 21   | 20   | 22   | 18   | 1.25     | 0.194568 | 17   | 1.36     | 0.204856 |
| 255035_at   | A4g09550 | putative protein or isoamylase, putative        | / starch debranchin                             | 360  | 471  | 543  | 555  | 622  | 546  | 458  | 574  | 0.80     | 0.116853 | 410  | 453  | 514  | 707  | 569  | 578  | 523  | 522  | 459  | 580  | 0.79     | 0.051551 | 618  | 0.74     | 0.040880 |
| 255036_at   | A4g09560 | putative protein or isoamylase, putative        | / starch debranchin                             | 57   | 63   | 68   | 63   | 68   | 63   | 68   | 63   | 0.82     | 0.408842 | 57   | 68   | 63   | 68   | 63   | 68   | 63   | 68   | 63   | 68   | 0.91     | 0.143887 | 63   | 0.93     | 0.342377 |
| 255037_at   | A4g09460 | DNA-binding protein - supported by full         | myb family transcription factor                 | 235  | 350  | 367  | 403  | 438  | 337  | 317  | 393  | 0.81     | 0.212701 | 301  | 323  | 275  | 559  | 484  | 429  | 523  | 479  | 300  | 581  | 0.82     | 0.002108 | 472  | 0.84     | 0.019075 |
| 255038_at   | A4g09510 | neutral invertase like protein Daucus c         | beta-fructofuranosylase, putative / invert      | 245  | 355  | 362  | 481  | 463  | 439  | 327  | 461  | 0.71     | 0.009890 | 328  | 369  | 389  | 671  | 461  | 430  | 572  | 537  | 362  | 534  | 0.68     | 0.025733 | 520  | 0.70     | 0.111497 |
| 255039_at   | A4g09570 | calmodulin-domain protein kinase CDP            | calcium-dependent protein kinase, putat         | 601  | 544  | 826  | 789  | 835  | 727  | 657  | 784  | 0.84     | 0.240070 | 294  | 286  | 355  | 462  | 326  | 349  | 521  | 467  | 312  | 425  | 0.73     | 0.073328 | 379  | 0.82     | 0.227930 |
| 255040_at   | A4g09580 | putative protein or isoamylase, putative        | / starch debranchin                             | 111  | 136  | 162  | 170  | 178  | 158  | 138  | 169  | 0.81     | 0.109419 | 121  | 134  | 135  | 201  | 154  | 154  | 156  | 149  | 130  | 163  | 0.80     | 0.047684 | 170  | 0.77     | 0.071003 |
| 255041_at   | A4g09620 | putative protein or isoamylase, putative        | / starch debranchin                             | 419  | 467  | 377  | 462  | 563  | 386  | 389  | 478  | 0.77     | 0.087869 | 415  | 467  | 484  | 598  | 482  | 431  | 391  |      |      |      |          |          |      |          |          |

|           |          |                                                                                      |       |       |       |       |       |       |       |       |          |          |       |       |       |       |       |       |       |       |          |       |          |          |       |          |          |
|-----------|----------|--------------------------------------------------------------------------------------|-------|-------|-------|-------|-------|-------|-------|-------|----------|----------|-------|-------|-------|-------|-------|-------|-------|-------|----------|-------|----------|----------|-------|----------|----------|
| 24969     | A4g10420 | putative protein various predicted prothylaxial protein                              | 209   | 34    | 45    | 51    | 52    | 37    | 36    | 47    | 0.777    | 0.198467 | 29    | 32    | 31    | 41    | 35    | 27    | 42    | 38    | 31       | 0.84  | 0.155818 | 34       | 0.89  | 0.425330 |          |
| 24969     | A4g10430 | hydrothetical protein , supported by full-expressed protein                          | 207   | 257   | 273   | 259   | 305   | 241   | 246   | 268   | 0.92     | 0.464466 | 162   | 183   | 201   | 264   | 223   | 186   | 222   | 196   | 182      | 217   | 0.83     | 0.121558 | 224   | 0.81     | 0.173442 |
| 24970     | A4g10430 | chlorothiol-Ab-binding protein - like chi chlorothiol-A-B binding protein CP26, c    | 2760  | 4094  | 3665  | 3655  | 4041  | 3060  | 3506  | 3585  | 0.98     | 0.878610 | 3228  | 3540  | 3469  | 4530  | 3937  | 3528  | 3842  | 3942  | 3412     | 3956  | 0.86     | 0.053507 | 3998  | 0.85     | 0.127734 |
| 24971     | A4g10380 | major intrinsic protein (MIP) - like nodu major intrinsic family protein / MIP fam   | 83    | 107   | 122   | 143   | 142   | 119   | 104   | 135   | 0.77     | 0.087071 | 80    | 71    | 91    | 87    | 74    | 73    | 77    | 84    | 84       | 79    | 1.02     | 0.802677 | 78    | 1.03     | 0.077293 |
| 24972     | A4g10440 | putative protein near to 10 putative alpha-1,4-galactosyl transferase family         | 30    | 31    | 31    | 31    | 31    | 31    | 31    | 31    | 0.97     | 0.346044 | 31    | 28    | 27    | 31    | 25    | 31    | 31    | 31    | 31       | 36    | 0.81     | 0.145177 | 32    | 0.81     | 0.254019 |
| 24973     | A4g10460 | putative retrotransposon Oryza sativa australi-like retrotransposon family           | 6     | 7     | 13    | 13    | 11    | 15    | 9     | 13    | 0.68     | 0.185096 | 9     | 9     | 7     | 8     | 10    | 10    | 8     | 7     | 8        | 9     | 0.99     | 0.918033 | 9     | 0.91     | 0.462980 |
| 24974     | A4g10490 | putative flavanone 3-beta-hydroxylase oxidoreductase, 2OG-Fe(II) oxynase 1           | 18    | 18    | 26    | 23    | 23    | 22    | 20    | 23    | 0.89     | 0.10873  | 15    | 16    | 18    | 15    | 17    | 15    | 17    | 15    | 17       | 16    | 1.00     | 0.975683 | 16    | 1.00     | 0.943817 |
| 24975     | A4g10500 | putative Fe(II)isobutylate oxidase SRG oxidoreductase, 2OG-Fe(II) oxynase 1          | 23    | 25    | 25    | 21    | 23    | 28    | 24    | 25    | 0.97     | 0.767897 | 18    | 21    | 21    | 21    | 25    | 21    | 19    | 23    | 19       | 21    | 1.11     | 0.380494 | 18    | 1.17     | 0.280823 |
| 24976     | A4g10510 | subtilisin-like serine protease contains : subtilase family protein                  | 18    | 19    | 22    | 22    | 21    | 26    | 18    | 19    | 21       | 0.612614 | 28    | 25    | 28    | 28    | 28    | 28    | 23    | 23    | 21       | 23    | 1.08     | 0.281688 | 24    | 1.08     | 0.483165 |
| 24977     | A4g10520 | subtilisin-like serine protease contains : subtilase family protein                  | 14    | 14    | 13    | 13    | 14    | 14    | 14    | 14    | 0.94     | 0.622142 | 15    | 15    | 15    | 14    | 13    | 13    | 12    | 13    | 13       | 13    | 1.09     | 0.729310 | 13    | 1.06     | 0.659810 |
| 24978     | A4g10540 | subtilisin-like serine protease contains : subtilase family protein                  | 12    | 19    | 16    | 16    | 17    | 16    | 16    | 16    | 1.02     | 0.889096 | 14    | 19    | 12    | 13    | 15    | 12    | 14    | 1.10  | 0.449526 | 13    | 1.14     | 0.450232 |       |          |          |
| 24979     | A4g10550 | subtilisin-like serine protease contains : subtilase family protein                  | 43    | 57    | 53    | 55    | 62    | 52    | 51    | 57    | 0.90     | 0.340116 | 50    | 44    | 50    | 56    | 50    | 56    | 53    | 48    | 52       | 0.92  | 0.268166 | 50       | 0.96  | 0.606420 |          |
| 24980     | A4g10450 | putative ribosomal protein L5, cytochrome b5 ribosomal protein L5 (RPL90D)           | 1070  | 1369  | 1291  | 1403  | 1164  | 1244  | 1536  | 0.93  | 0.498264 | 151      | 164   | 1087  | 1506  | 1151  | 1000  | 1228  | 1151  | 1243  | 108      | 0.80  | 0.81806  | 1219     | 0.82  | 0.226339 |          |
| 24981     | A4g10480 | putative alpha NAC storage protein similar to nascent polypeptide associated complex | 14981 | 14240 | 14389 | 14389 | 14389 | 14389 | 14389 | 14389 | 0.98     | 0.14389  | 14981 | 14389 | 14389 | 14389 | 14389 | 14389 | 14389 | 14389 | 14389    | 14389 | 0.98     | 0.14389  | 14981 | 0.98     | 0.14389  |
| 24982     | A4g10470 | putative protein : supported by cDNA : expressed protein                             | 671   | 71    | 78    | 99    | 103   | 68    | 70    | 0.78  | 0.172465 | 65       | 66    | 69    | 107   | 81    | 80    | 77    | 78    | 67    | 78       | 67    | 0.89     | 0.056522 | 90    | 0.74     | 0.064422 |
| 24983     | A4g10560 | putative protein other hydrothetical protein DC1 domain-containing protein           | 26    | 16    | 21    | 23    | 19    | 18    | 20    | 0.88  | 0.379159 | 16       | 13    | 20    | 18    | 15    | 14    | 19    | 17    | 16    | 17       | 16    | 0.98     | 0.877032 | 16    | 1.05     | 0.079201 |
| 24984_s_a | A4g10560 | putative protein Homo sapiens debuius debuius carbonyl-terminal hydrolase fan        | 266   | 356   | 362   | 390   | 480   | 322   | 328   | 397   | 0.83     | 0.279481 | 232   | 197   | 240   | 340   | 259   | 245   | 269   | 263   | 223      | 275   | 0.81     | 0.075511 | 281   | 0.79     | 0.146201 |
| 24984_s_b | A4g10560 | putative reverse transcriptase like pro virus-like retrotransposon fam 11/ ova       | 266   | 356   | 362   | 390   | 480   | 322   | 328   | 397   | 0.83     | 0.279481 | 232   | 197   | 240   | 340   | 259   | 245   | 269   | 263   | 223      | 275   | 0.81     | 0.075511 | 281   | 0.79     | 0.146201 |
| 24986     | A4g10560 | putative protein SF16 protein -Helanli calmodulin-binding family protein             | 157   | 167   | 185   | 203   | 195   | 186   | 170   | 195   | 0.87     | 0.059788 | 285   | 298   | 315   | 419   | 336   | 290   | 379   | 353   | 299      | 355   | 0.84     | 0.105604 | 348   | 0.86     | 0.276657 |
| 24987_s_a | A4g10640 | hydrothetical protein                                                                | 15    | 15    | 18    | 19    | 22    | 18    | 17    | 20    | 0.85     | 0.095324 | 12    | 14    | 21    | 15    | 13    | 17    | 24    | 18    | 16       | 17    | 0.90     | 0.602257 | 15    | 1.04     | 0.871736 |
| 24988     | A4g10670 | putative protein Ran GTPase activator translocation elongation factor-related        | 51    | 67    | 68    | 79    | 78    | 84    | 72    | 80    | 0.90     | 0.598658 | 40    | 43    | 54    | 40    | 37    | 38    | 43    | 45    | 39       | 39    | 1.16     | 0.022246 | 38    | 1.20     | 0.148263 |
| 24989     | A4g10680 | putative protein conserved hydrothetical protein                                     | 738   | 1142  | 1421  | 907   | 1150  | 827   | 1100  | 982   | 1.12     | 0.618989 | 798   | 945   | 751   | 1317  | 968   | 985   | 1069  | 1041  | 1033     | 1075  | 0.77     | 0.104224 | 1090  | 0.76     | 0.112523 |
| 24990     | A4g10680 | putative protein conserved hydrothetical protein                                     | 738   | 1142  | 1421  | 907   | 1150  | 827   | 1100  | 982   | 1.12     | 0.618989 | 798   | 945   | 751   | 1317  | 968   | 985   | 1069  | 1041  | 1033     | 1075  | 0.77     | 0.104224 | 1090  | 0.76     | 0.112523 |
| 24991     | A4g10620 | putative protein conserved hydrothetical expressed protein                           | 185   | 210   | 232   | 250   | 260   | 232   | 209   | 247   | 0.85     | 0.070461 | 206   | 178   | 208   | 267   | 218   | 211   | 238   | 224   | 197      | 232   | 0.85     | 0.061267 | 232   | 0.85     | 0.158805 |
| 24992     | A4g10710 | putative transcriptional regulator                                                   | 1474  | 594   | 598   | 661   | 747   | 544   | 555   | 651   | 0.85     | 0.252096 | 422   | 287   | 375   | 502   | 452   | 367   | 479   | 479   | 361      | 456   | 0.79     | 0.069501 | 440   | 0.82     | 0.231226 |
| 24993     | A4g10730 | putative protein kinase                                                              | 216   | 216   | 78    | 75    | 73    | 72    | 73    | 73    | 0.91     | 0.403275 | 58    | 64    | 54    | 66    | 65    | 55    | 61    | 63    | 59       | 67    | 0.82     | 0.363102 | 62    | 0.84     | 0.493392 |
| 24994     | A4g10730 | putative methyltransferase                                                           | 216   | 216   | 78    | 75    | 73    | 72    | 73    | 73    | 0.91     | 0.403275 | 58    | 64    | 54    | 66    | 65    | 55    | 61    | 63    | 59       | 67    | 0.82     | 0.363102 | 62    | 0.84     | 0.493392 |
| 24995     | A4g10730 | putative disease resistance protein                                                  | 216   | 216   | 78    | 75    | 73    | 72    | 73    | 73    | 0.91     | 0.403275 | 58    | 64    | 54    | 66    | 65    | 55    | 61    | 63    | 59       | 67    | 0.82     | 0.363102 | 62    | 0.84     | 0.493392 |
| 24996     | A4g10730 | putative disease resistance protein                                                  | 216   | 216   | 78    | 75    | 73    | 72    | 73    | 73    | 0.91     | 0.403275 | 58    | 64    | 54    | 66    | 65    | 55    | 61    | 63    | 59       | 67    | 0.82     | 0.363102 | 62    | 0.84     | 0.493392 |
| 24997     | A4g10730 | putative disease resistance protein                                                  | 216   | 216   | 78    | 75    | 73    | 72    | 73    | 73    | 0.91     | 0.403275 | 58    | 64    | 54    | 66    | 65    | 55    | 61    | 63    | 59       | 67    | 0.82     | 0.363102 | 62    | 0.84     | 0.493392 |
| 24998     | A4g10730 | putative disease resistance protein                                                  | 216   | 216   | 78    | 75    | 73    | 72    | 73    | 73    | 0.91     | 0.403275 | 58    | 64    | 54    | 66    | 65    | 55    | 61    | 63    | 59       | 67    | 0.82     | 0.363102 | 62    | 0.84     | 0.493392 |
| 24999     | A4g10800 | putative protein predicted proteins, Ars F-box family protein                        | 15    | 12    | 16    | 16    | 19    | 22    | 14    | 19    | 0.76     | 0.093684 | 13    | 12    | 18    | 9     | 11    | 19    | 48    | 53    | 48       | 54    | 0.89     | 0.477297 | 53    | 0.91     | 0.667146 |
| 25000     | A4g10820 | putative protein predicted proteins, Ars F-box family protein                        | 15    | 12    | 16    | 16    | 19    | 22    | 14    | 19    | 0.76     | 0.093684 | 13    | 12    | 18    | 9     | 11    | 19    | 48    | 53    | 48       | 54    | 0.89     | 0.477297 | 53    | 0.91     | 0.667146 |
| 25001     | A4g10830 | putative protein predicted proteins, Ars F-box family protein                        | 15    | 12    | 16    | 16    | 19    | 22    | 14    | 19    | 0.76     | 0.093684 | 13    | 12    | 18    | 9     | 11    | 19    | 48    | 53    | 48       | 54    | 0.89     | 0.477297 | 53    | 0.91     | 0.667146 |
| 25002     | A4g10830 | putative protein predicted proteins, Ars F-box family protein                        | 15    | 12    | 16    | 16    | 19    | 22    | 14    | 19    | 0.76     | 0.093684 | 13    | 12    | 18    | 9     | 11    | 19    | 48    | 53    | 48       | 54    | 0.89     | 0.477297 | 53    | 0.91     | 0.667146 |
| 25003     | A4g10830 | putative protein predicted proteins, Ars F-box family protein                        | 15    | 12    | 16    | 16    | 19    | 22    | 14    | 19    | 0.76     | 0.093684 | 13    | 12    | 18    | 9     | 11    | 19    | 48    | 53    | 48       | 54    | 0.89     | 0.477297 | 53    | 0.91     | 0.667146 |
| 25004     | A4g10830 | putative protein predicted proteins, Ars F-box family protein                        | 15    | 12    | 16    | 16    | 19    | 22    | 14    | 19    | 0.76     | 0.093684 | 13    | 12    | 18    | 9     | 11    | 19    | 48    | 53    | 48       | 54    | 0.89     | 0.477297 | 53    | 0.91     | 0.667146 |
| 25005     | A4g10830 | putative protein predicted proteins, Ars F-box family protein                        | 15    | 12    | 16    | 16    | 19    | 22    | 14    | 19    | 0.76     | 0.093684 | 13    | 12    | 18    | 9     | 11    | 19    | 48    | 53    | 48       | 54    | 0.89     | 0.477297 | 53    | 0.91     | 0.667146 |
| 25006     | A4g10830 | putative protein predicted proteins, Ars F-box family protein                        | 15    | 12    | 16    | 16    | 19    | 22    | 14    | 19    | 0.76     | 0.093684 | 13    | 12    | 18    | 9     | 11    | 19    | 48    | 53    | 48       | 54    | 0.89     | 0.477297 | 53    | 0.91     | 0.667146 |
| 25007     | A4g10830 | putative protein predicted proteins, Ars F-box family protein                        | 15    | 12    | 16    | 16    | 19    | 22    | 14    | 19    | 0.76     | 0.093684 | 13    | 12    | 18    | 9     | 11    | 19    | 48    | 53    | 48       | 54    | 0.89     | 0.477297 | 53    | 0.91     | 0.667146 |
| 25008     | A4g10830 | putative protein predicted proteins, Ars F-box family protein                        | 15    | 12    | 16    | 16    | 19    | 22    | 14    | 19    | 0.76     | 0.093684 | 13    | 12    | 18    | 9     | 11    | 19    | 48    | 53    | 48       | 54    | 0.89     | 0.477297 | 53    | 0.91     | 0.667146 |
| 25009     | A4g10830 | putative protein predicted proteins, Ars F-box family protein                        | 15    | 12    | 16    | 16    | 19    | 22    | 14    | 19    | 0.76     | 0.093684 | 13    | 12    | 18    | 9     | 11    | 19    | 48    | 53    | 48       | 54    | 0.89     | 0.477297 | 53    | 0.91     | 0.667146 |
| 25010     | A4g10830 | putative protein predicted proteins, Ars F-box family protein                        | 15    | 12    | 16    | 16    | 19    | 22    | 14    | 19    | 0.76     | 0.093684 | 13    | 12    | 18    | 9     | 11    | 19    | 48    | 53    | 48       | 54    | 0.89     | 0.477297 | 53    | 0.91     | 0.667146 |
| 25011     | A4g10830 | putative protein predicted proteins, Ars F-box family protein                        | 15    | 12    | 16    | 16    | 19    | 22    | 14    | 19    | 0.76     | 0.093684 | 13    | 12    | 18    | 9     | 11    | 19    | 48    | 53    | 48       | 54    | 0.89     | 0.477297 | 53    | 0.91     | 0.667146 |
| 25012     | A4g10830 | putative protein predicted proteins, Ars F-box family protein                        | 15    | 12    | 16    | 16    | 19    | 22    | 14    | 19    | 0.76     | 0.093684 | 13    | 12    | 18    | 9     | 11    | 19    | 48    | 53    | 48       | 54    | 0.89     | 0.477297 | 53    | 0.91     | 0.667146 |
| 25013     | A4g10830 | putative protein predicted proteins, Ars F-box family protein                        | 15    | 12    | 16    | 16    | 19    | 22    | 14    | 19    | 0.76     | 0.093684 | 13    | 12    | 18    | 9     | 11    | 19    | 48    | 53    | 48       | 54    | 0.89     | 0.477297 | 53    | 0.91     | 0.667146 |
| 25014     | A4g10830 | putative protein predicted proteins, Ars F-box family protein                        | 15    | 12    | 16    | 16    | 19    | 22    | 14    | 19    | 0.76     | 0.093684 | 13    | 12    | 18    | 9     | 11    | 19    | 48    | 53    | 48       | 54    | 0.89     | 0.477297 | 53    | 0.91     | 0.667146 |
| 25015     | A4g10830 | putative protein predicted proteins, Ars F-box family protein                        | 15    | 12    | 16    | 16    | 19    | 22    | 14    | 19    | 0.76     | 0.093684 | 13    | 12    | 18    | 9     | 11    | 19    | 48    | 53    | 48       | 54    | 0.89     | 0.477297 | 53    | 0.91     | 0.667146 |
| 25016     | A4g10830 | putative protein predicted proteins, Ars F-box family protein                        | 15    | 12    | 16    | 16    | 19    | 22    | 14    | 19    | 0.76     | 0.093684 | 13    | 12    | 18    | 9     | 11    | 19    | 48    | 53    | 48       | 54    | 0.89     | 0.477297 | 53    | 0.91     | 0.667146 |
| 25017     | A4g10830 | putative protein predicted proteins, Ars F-box family protein                        | 15    | 12    | 16    | 16    | 19    | 22    | 14    | 19    | 0.76     | 0.093684 | 13    | 12    | 18    | 9     | 11    | 19    | 48    | 53    | 48       | 54    | 0.89     | 0.477297 | 53    | 0.91     | 0.667146 |

|             |           |                                                                                    |     |     |     |     |     |     |     |      |          |          |     |     |     |     |     |     |     |     |     |      |          |          |      |          |          |
|-------------|-----------|------------------------------------------------------------------------------------|-----|-----|-----|-----|-----|-----|-----|------|----------|----------|-----|-----|-----|-----|-----|-----|-----|-----|-----|------|----------|----------|------|----------|----------|
| 254873_at   | Ak4g11420 | putative protein a 162 kDa component eukaryotic translation initiation factor 3 s  | 752 | 833 | 938 | 798 | 890 | 751 | 841 | 813  | 1.03     | 0.698923 | 586 | 574 | 626 | 765 | 582 | 492 | 703 | 685 | 595 | 645  | 0.92     | 0.472273 | 613  | 0.97     | 0.838700 |
| 254874_at   | Ak4g11570 | putative protein beta-phosphoglucomu halocatalytic hydrolase fa                    | 111 | 163 | 193 | 215 | 193 | 167 | 156 | 192  | 8.81     | 0.259630 | 180 | 154 | 180 | 279 | 225 | 181 | 201 | 195 | 165 | 216  | 0.76     | 0.075316 | 629  | 0.72     | 0.098384 |
| 254875_at   | Ak4g11590 | outative protein various predicted prot F-box family pro                           | 9   | 14  | 18  | 14  | 15  | 14  | 14  | 14   | 0.98     | 0.898896 | 12  | 18  | 16  | 12  | 17  | 16  | 19  | 13  | 15  | 15   | 0.99     | 0.970272 | 15   | 1.03     | 0.875121 |
| 254876_at   | Ak4g11630 | autative choschovadiethanolate trs c2 domain-containing protein                    | 25  | 34  | 37  | 17  | 38  | 34  | 42  | 38   | 0.96     | 0.700477 | 17  | 34  | 28  | 32  | 28  | 33  | 27  | 26  | 23  | 26   | 1.04     | 0.794382 | 27   | 0.94     | 0.763153 |
| 254877_at   | Ak4g11640 | outative protein threonine dehydratase serine racemase, putative                   | 144 | 189 | 220 | 237 | 269 | 210 | 184 | 239  | 0.77     | 0.123605 | 188 | 194 | 208 | 277 | 227 | 225 | 253 | 224 | 197 | 241  | 0.82     | 0.021974 | 243  | 0.81     | 0.061504 |
| 254878_at   | Ak4g11660 | heat shock transcription factor - like on heat shock factor protein 7 (HSF7) / hea | 176 | 228 | 216 | 284 | 356 | 189 | 206 | 276  | 0.75     | 0.239703 | 177 | 194 | 181 | 250 | 188 | 172 | 205 | 201 | 184 | 203  | 0.90     | 0.320629 | 204  | 0.90     | 0.460656 |
| 254879_at   | Ak4g11670 | hypothetical protein                                                               | 156 | 213 | 190 | 226 | 266 | 187 | 186 | 226  | 0.82     | 0.229118 | 141 | 123 | 164 | 194 | 172 | 148 | 170 | 159 | 143 | 169  | 0.85     | 0.102678 | 171  | 0.83     | 0.185754 |
| 254880_at   | Ak4g11680 | outative protein Crp1, Zea mays, AF07 expressed protein (PPR) repeat-contains      | 60  | 64  | 65  | 71  | 74  | 62  | 64  | 70   | 0.91     | 0.187632 | 50  | 67  | 62  | 58  | 47  | 64  | 57  | 61  | 58  | 57   | 1.04     | 0.664941 | 54   | 0.98     | 0.131391 |
| 254881_at   | Ak4g11700 | hypothetical protein                                                               | 17  | 17  | 16  | 19  | 21  | 17  | 20  | 0.83 | 0.013843 | 13       | 14  | 20  | 15  | 16  | 13  | 15  | 16  | 15  | 10  | 17   | 0.91     | 0.907166 | 15   | 1.04     | 0.820838 |
| 254882_s_at | Ak4g11710 | outative protein various overexposed reve non-LTR retrotransposon family (LINE)    | 13  | 20  | 25  | 24  | 25  | 21  | 19  | 23   | 0.83     | 0.323428 | 15  | 16  | 19  | 16  | 16  | 18  | 19  | 16  | 16  | 17   | 0.97     | 0.683562 | 17   | 0.99     | 0.925135 |
| 254883_at   | Ak4g11720 | outative protein histidine-rich olcovortor hypothetical protein                    | 26  | 37  | 37  | 34  | 28  | 37  | 33  | 33   | 1.00     | 0.987511 | 20  | 37  | 35  | 30  | 21  | 43  | 35  | 31  | 30  | 1.00 | 0.982906 | 25       | 1.22 | 0.408761 |          |
| 254884_at   | Ak4g11730 | H-transcorin ATPase - like protein I ATPase, plasma membrane-tyoe, puta            | 14  | 18  | 17  | 19  | 17  | 17  | 17  | 18   | 0.96     | 0.705062 | 14  | 24  | 14  | 14  | 14  | 13  | 10  | 16  | 18  | 13   | 1.35     | 0.148780 | 13   | 1.33     | 0.265153 |
| 254885_at   | Ak4g11750 | putative protein various predicted prot kelch repeat-containing protein /// kelch  | 20  | 27  | 22  | 28  | 24  | 24  | 24  | 25   | 0.95     | 0.659366 | 19  | 17  | 23  | 20  | 18  | 18  | 32  | 17  | 19  | 21   | 0.92     | 0.899562 | 19   | 1.04     | 0.735653 |
| 254886_at   | Ak4g11760 | putative protein b4A protein, Brassica expressed protein                           | 14  | 15  | 17  | 13  | 23  | 17  | 15  | 18   | 0.86     | 0.465942 | 11  | 14  | 14  | 12  | 11  | 12  | 16  | 10  | 13  | 12   | 1.08     | 0.558965 | 12   | 1.13     | 0.253228 |
| 254887_at   | Ak4g11770 | putative protein various predicted prot kelch repeat-containing F-box family pro   | 24  | 33  | 45  | 36  | 39  | 41  | 36  | 39   | 0.92     | 0.559537 | 22  | 21  | 31  | 31  | 23  | 20  | 31  | 28  | 24  | 27   | 0.92     | 0.602675 | 24   | 1.00     | 0.994782 |
| 254888_at   | Ak4g11780 | outative protein overexposed protein, Atha hypothetical protein                    | 14  | 14  | 17  | 15  | 21  | 19  | 15  | 18   | 0.82     | 0.188955 | 11  | 10  | 15  | 12  | 16  | 12  | 13  | 17  | 12  | 14   | 0.85     | 0.301596 | 13   | 0.90     | 0.549986 |
| 254889_at   | Ak4g11830 | osmotin precursor, supported by full-le osmotin-like protein (OSM34)               | 18  | 16  | 23  | 22  | 23  | 23  | 19  | 22   | 0.85     | 0.168743 | 11  | 19  | 19  | 13  | 14  | 15  | 22  | 15  | 17  | 16   | 1.05     | 0.737742 | 14   | 1.18     | 0.380655 |
| 254890_at   | Ak4g11860 | chosholoid hydroxeroxide glutathione peroxidase, putative                          | 437 | 546 | 717 | 661 | 841 | 632 | 567 | 711  | 0.80     | 0.235654 | 809 | 921 | 868 | 991 | 825 | 818 | 800 | 841 | 866 | 855  | 1.01     | 0.838213 | 878  | 0.99     | 0.864849 |
| 254891_at   | Ak4g11740 | putative protein Flv Fa-associated fat arA-interacting protein, putative (SAY1)    | 176 | 220 | 232 | 231 | 302 | 213 | 209 | 249  | 0.84     | 0.285691 | 257 | 249 | 240 | 320 | 287 | 250 | 299 | 284 | 248 | 288  | 0.88     | 0.044762 | 286  | 0.87     | 0.148645 |
| 254892_at   | Ak4g11800 | putative protein other hypothetical prot calcineurin-like phosphoesterase family   | 304 | 390 | 373 | 437 | 466 | 329 | 355 | 411  | 0.87     | 0.323130 | 285 | 251 | 303 | 403 | 333 | 289 | 376 | 361 | 279 | 353  | 0.79     | 0.041579 | 342  | 0.82     | 0.183737 |
| 254893_at   | Ak4g11850 | putative phospholipase D-alpha cho phospholipase D gamma 2 / PLD gamm              | 41  | 43  | 57  | 70  | 60  | 48  | 47  | 60   | 0.79     | 0.196182 | 38  | 34  | 45  | 60  | 44  | 43  | 71  | 61  | 39  | 56   | 0.70     | 0.065414 | 49   | 0.80     | 0.183538 |
| 254894_at   | Ak4g11840 | outative chosholipase D-alpha cho phospholipase D gamma 2 / PLD gamm               | 13  | 15  | 16  | 18  | 19  | 11  | 14  | 16   | 0.91     | 0.625404 | 11  | 10  | 12  | 12  | 10  | 7   | 14  | 14  | 11  | 12   | 0.96     | 0.806693 | 10   | 1.12     | 0.485555 |
| 254895_at   | Ak4g11870 | hypothetical protein                                                               | 15  | 17  | 25  | 25  | 21  | 21  | 19  | 22   | 0.85     | 0.387878 | 15  | 16  | 18  | 17  | 14  | 13  | 18  | 16  | 16  | 16   | 1.03     | 0.806345 | 14   | 1.14     | 0.218039 |
| 254896_at   | Ak4g11880 | MADS-box protein AGL14 MADS-box protein (AGL14)                                    | 22  | 22  | 27  | 22  | 25  | 26  | 24  | 24   | 0.98     | 0.738616 | 16  | 22  | 25  | 22  | 14  | 15  | 19  | 18  | 21  | 18   | 1.18     | 0.283320 | 17   | 1.22     | 0.369269 |
| 254899_at   | Ak4g11890 | protein kinase - like protein Ki domain protein kinase family protein              | 18  | 20  | 26  | 28  | 26  | 30  | 21  | 31   | 0.68     | 0.040347 | 20  | 21  | 19  | 16  | 17  | 21  | 22  | 17  | 20  | 18   | 1.10     | 0.332173 | 18   | 1.13     | 0.225235 |
| 254900_at   | Ak4g11900 | Ki domain interacting kinase 1 -like pro S-luciferin protein kinase family prote   | 12  | 9   | 12  | 12  | 15  | 11  | 12  | 9    | 1.01     | 0.602877 | 13  | 10  | 7   | 10  | 8   | 11  | 13  | 12  | 10  | 11   | 0.94     | 0.718962 | 10   | 1.04     | 0.823503 |
| 254871_at   | Ak4g11920 | Srw1 -like protein WD repeat protein S WD-40 repeat family protein                 | 76  | 98  | 100 | 131 | 129 | 109 | 91  | 123  | 0.74     | 0.035849 | 71  | 63  | 68  | 104 | 90  | 71  | 84  | 86  | 67  | 87   | 0.77     | 0.035533 | 88   | 0.76     | 0.099178 |
| 254840_at   | Ak4g11930 | hypothetical protein                                                               | 66  | 64  | 89  | 89  | 87  | 87  | 73  | 88   | 0.83     | 0.141606 | 49  | 60  | 66  | 52  | 58  | 58  | 64  | 61  | 58  | 59   | 0.99     | 0.926912 | 56   | 1.04     | 0.708097 |
| 254841_at   | Ak4g11940 | outative protein overexposed proteins Arat, hypothetical protein                   | 31  | 34  | 42  | 41  | 44  | 41  | 36  | 42   | 0.85     | 0.142479 | 21  | 32  | 30  | 27  | 29  | 32  | 36  | 28  | 32  | 0.87 | 0.260958 | 31       | 0.90 | 0.542234 |          |
| 254842_at   | Ak4g11950 | outative protein other hypothetical prot hypothetical protein                      | 52  | 62  | 63  | 68  | 62  | 58  | 63  | 78   | 0.88     | 0.035849 | 48  | 52  | 60  | 46  | 43  | 49  | 54  | 47  | 50  | 1.12 | 0.203985 | 48       | 1.21 | 0.053896 |          |
| 254843_at   | Ak4g11860 | putative protein TAK1 binding protein - expressed protein                          | 178 | 254 | 222 | 244 | 283 | 214 | 218 | 247  | 0.88     | 0.358599 | 194 | 170 | 198 | 231 | 212 | 179 | 227 | 214 | 187 | 213  | 0.88     | 0.126548 | 207  | 0.90     | 0.309249 |
| 254844_at   | Ak4g11790 | hypothetical protein supported by full-le Ran-binding protein 1 domain-contains    | 168 | 213 | 228 | 257 | 264 | 217 | 203 | 246  | 0.83     | 0.140524 | 194 | 201 | 242 | 337 | 249 | 213 | 234 | 227 | 212 | 252  | 0.84     | 0.249618 | 266  | 0.80     | 0.245383 |
| 254845_at   | Ak4g11820 | hydroxymethylglutaryl-CoA synthase 3 hydroxymethylglutaryl-CoA synthase / H        | 271 | 333 | 300 | 463 | 437 | 341 | 301 | 420  | 0.72     | 0.058270 | 291 | 331 | 367 | 547 | 445 | 321 | 458 | 430 | 330 | 440  | 0.75     | 0.072015 | 437  | 0.75     | 0.192320 |
| 254846_at   | Ak4g11830 | Exoexposed protein - supported by full-le phospholipase D gamma 2 / PLD gamm       | 68  | 81  | 99  | 108 | 119 | 95  | 83  | 107  | 0.77     | 0.096075 | 61  | 63  | 68  | 89  | 67  | 80  | 71  | 64  | 75  | 67   | 0.85     | 0.107949 | 75   | 0.86     | 0.226773 |
| 254847_at   | Ak4g11850 | outative chosholipase D-alpha cho phospholipase D gamma 2 / PLD gamm               | 102 | 135 | 125 | 137 | 160 | 115 | 121 | 137  | 0.88     | 0.386554 | 143 | 109 | 126 | 152 | 138 | 115 | 164 | 168 | 126 | 147  | 0.86     | 0.199446 | 135  | 0.94     | 0.577443 |
| 254848_at   | Ak4g11960 | putative protein hypothetical protein F7 expressed protein                         | 125 | 183 | 226 | 214 | 234 | 191 | 178 | 213  | 0.84     | 0.331543 | 220 | 282 | 255 | 340 | 261 | 246 | 274 | 274 | 252 | 279  | 0.90     | 0.320783 | 283  | 0.89     | 0.422919 |
| 254849_at   | Ak4g11970 | putative protein RNA splicing-related p YTS218-like family protein                 | 91  | 116 | 140 | 147 | 146 | 130 | 115 | 141  | 0.82     | 0.189577 | 93  | 80  | 97  | 125 | 99  | 108 | 102 | 100 | 90  | 106  | 0.85     | 0.089936 | 110  | 0.82     | 0.101016 |
| 254850_at   | Ak4g12000 | outative protein overexposed proteins Arat, expressed protein                      | 120 | 163 | 219 | 212 | 230 | 169 | 211 | 0.80 | 0.235942 | 136      | 141 | 155 | 215 | 146 | 145 | 140 | 154 | 140 | 144 | 162  | 0.84     | 0.315023 | 175  | 0.81     | 0.219599 |
| 254851_at   | Ak4g12010 | putative disease resistance protein (TH disease resistance protein (TIR-NBS-LR     | 50  | 63  | 74  | 71  | 70  | 59  | 62  | 67   | 0.93     | 0.809933 | 37  | 44  | 46  | 59  | 50  | 42  | 55  | 61  | 42  | 53   | 0.79     | 0.061927 | 50   | 0.84     | 0.216854 |
| 254852_at   | Ak4g12020 | outative disease resistance protein DN protein kinase family protein               | 142 | 209 | 245 | 214 | 252 | 184 | 199 | 217  | 0.92     | 0.644022 | 142 | 118 | 157 | 189 | 168 | 147 | 178 | 154 | 139 | 168  | 0.83     | 0.075480 | 168  | 0.83     | 0.157698 |
| 254853_at   | Ak4g12080 | outative DNA-binding protein Arat-HN DNA-binding family protein                    | 122 | 139 | 173 | 152 | 175 | 131 | 144 | 153  | 0.95     | 0.699042 | 143 | 178 | 145 | 223 | 200 | 175 | 209 | 186 | 155 | 199  | 0.78     | 0.022108 | 199  | 0.78     | 0.071042 |
| 254854_at   | Ak4g12100 | outative protein hypothetical protein S1 diolase cleavage T family protein / amin  | 75  | 102 | 102 | 131 | 141 | 108 | 92  | 127  | 0.73     | 0.055862 | 92  | 90  | 98  | 138 | 106 | 101 | 121 | 113 | 93  | 116  | 0.81     | 0.044903 | 115  | 0.81     | 0.143086 |
| 254855_s_at | Ak4g12140 | putative protein other predicted prot C3H4C-type RING finger) fa                   | 26  | 26  | 32  | 24  | 27  | 26  | 28  | 27   | 1.06     | 0.034111 | 21  | 21  | 20  | 23  | 17  | 18  | 20  | 21  | 18  | 20   | 1.18     | 0.038844 | 20   | 1.04     | 0.004079 |
| 254856_at   | Ak4g12160 | putative ribosomal protein (fragment) p pseudocaine, 40S ribosomal protein S9 I    | 10  | 9   | 10  | 12  | 9   | 14  | 10  | 12   | 0.83     | 0.254259 | 6   | 10  | 11  | 11  | 8   | 10  | 11  | 9   | 9   | 10   | 0.94     | 0.658842 | 9    | 0.97     | 0.871043 |
| 254857_at   | Ak4g12200 | putative protein acetylcholine regulator cytochrome-related Sec1 protein, putativ  | 97  | 130 | 123 | 145 | 173 | 115 | 117 | 145  | 0.81     | 0.224101 | 114 | 94  | 100 | 129 | 108 | 93  | 118 | 92  | 103 | 108  | 0.95     | 0.630264 | 110  | 0.93     | 0.578060 |
| 254858_at   | Ak4g12070 | outative protein other predicted protein cytochrome C12o amino acid oxidase        | 188 | 183 | 205 | 192 | 200 | 178 | 182 | 190  | 0.96     | 0.621929 | 140 | 168 | 183 | 133 | 137 | 185 | 154 | 151 | 158 | 195  | 0.96     | 0.861701 | 151  | 1.00     | 0.996414 |
| 254859_at   | Ak4g12080 | outative protein Arabidopsis thaliana C Cio amino acid oxidase                     | 139 | 163 | 176 | 239 | 232 | 190 | 160 | 224  | 0.71     | 0.016714 | 177 | 254 | 266 | 197 | 232 | 230 | 232 | 230 | 232 | 230  | 0.75     | 0.052188 | 266  | 0.74     | 0.029910 |
| 254860_at   | Ak4g12110 | outative C-4 steroid methyl oxidase C-4 steroid desaturase family protein          | 155 | 178 | 205 | 264 | 253 | 230 | 179 | 249  | 0.72     | 0.016431 | 156 | 168 | 185 | 329 | 227 | 230 | 178 | 186 | 170 | 230  | 0.74     | 0.148907 | 262  | 0.65     | 0.055973 |
|             |           |                                                                                    |     |     |     |     |     |     |     |      |          |          |     |     |     |     |     |     |     |     |     |      |          |          |      |          |          |

|             |           |                                                                                       |      |      |      |      |      |      |      |      |          |          |      |      |      |      |      |      |      |      |      |      |          |          |          |          |          |          |
|-------------|-----------|---------------------------------------------------------------------------------------|------|------|------|------|------|------|------|------|----------|----------|------|------|------|------|------|------|------|------|------|------|----------|----------|----------|----------|----------|----------|
| 254785_at   | Ak4g12730 | putative pollen surface protein endosp fasciclin-like arabinogalactan-protein (FL     | 187  | 173  | 117  | 153  | 189  | 110  | 159  | 151  | 1.06     | 0.798914 | 119  | 116  | 113  | 141  | 110  | 83   | 99   | 98   | 116  | 106  | 1.09     | 0.485651 | 112      | 1.04     | 0.798495 |          |
| 254786_at   | Ak4g12890 | putative protein gamma-interferon-ind, amca interferon responsive lysosomal           | 215  | 2931 | 3279 | 3263 | 3117 | 3042 | 2975 | 3141 | 0.95     | 0.400754 | 3050 | 3002 | 3274 | 3920 | 3517 | 2943 | 3418 | 3297 | 3108 | 3419 | 0.91     | 0.207330 | 3460     | 0.90     | 0.299808 |          |
| 254787_at   | Ak4g12990 | outative protein hydrovthal proteins A expressed protein                              | 136  | 171  | 229  | 141  | 189  | 122  | 178  | 151  | 1.18     | 0.473778 | 66   | 83   | 74   | 83   | 76   | 77   | 108  | 95   | 74   | 88   | 0.85     | 0.188193 | 79       | 0.95     | 0.503063 |          |
| 254788_at   | Ak4g12970 | outative protein predicted protein ATP-binding family protein                         | 644  | 645  | 646  | 647  | 648  | 649  | 650  | 651  | 0.86     | 0.260677 | 775  | 705  | 731  | 999  | 845  | 775  | 705  | 748  | 749  | 750  | 0.86     | 0.171031 | 873      | 0.90     | 0.104020 |          |
| 254789_at   | Ak4g12880 | blue coocer-binding protein, 15K (lami plastocyanin-like domain-containing prot       | 453  | 529  | 611  | 623  | 834  | 724  | 532  | 794  | 0.67     | 0.009935 | 524  | 644  | 622  | 1059 | 810  | 733  | 636  | 641  | 597  | 776  | 0.77     | 0.145901 | 867      | 0.69     | 0.061929 |          |
| 254790_at   | Ak4g12800 | probable photosystem I chain XI precu photosystem I reaction center subunit XI        | 1445 | 2024 | 1748 | 1097 | 2186 | 1658 | 1739 | 1940 | 0.90     | 0.425804 | 2037 | 2317 | 2163 | 2889 | 2496 | 2332 | 2512 | 2450 | 2172 | 2536 | 0.86     | 0.039037 | 2573     | 0.84     | 0.095154 |          |
| 254791_at   | Ak4g12910 | SERINE CARBOXYPEPTIDASE I PRF serine carboxypeptidase S10 family prot                 | 549  | 559  | 566  | 527  | 498  | 452  | 591  | 493  | 1.20     | 0.085195 | 550  | 459  | 569  | 953  | 802  | 705  | 676  | 643  | 528  | 756  | 0.70     | 0.028600 | 820      | 0.64     | 0.021115 |          |
| 254792_at   | Ak4g12920 | putative protein, possibly DNA-binding, zinc-binding dehydro                          | 24   | 31   | 27   | 27   | 31   | 28   | 39   | 23   | 0.99     | 0.039269 | 24   | 25   | 22   | 22   | 19   | 25   | 25   | 25   | 25   | 25   | 0.99     | 0.054376 | 23       | 0.98     | 0.12793  |          |
| 254793_at   | Ak4g12930 | hypothetical protein                                                                  | 22   | 22   | 26   | 28   | 25   | 21   | 23   | 25   | 0.94     | 0.564182 | 20   | 17   | 23   | 20   | 16   | 27   | 21   | 21   | 20   | 21   | 0.94     | 0.856074 | 21       | 0.94     | 0.743217 |          |
| 254794_at   | Ak4g12970 | putative protein                                                                      | 83   | 144  | 170  | 134  | 115  | 115  | 132  | 121  | 1.09     | 0.697282 | 254  | 304  | 277  | 411  | 285  | 299  | 366  | 348  | 279  | 342  | 0.81     | 0.096823 | 332      | 0.84     | 0.276960 |          |
| 254795_at   | Ak4g12990 | putative protein                                                                      | 52   | 72   | 72   | 72   | 78   | 64   | 68   | 72   | 0.95     | 0.712554 | 63   | 58   | 66   | 85   | 67   | 67   | 84   | 74   | 62   | 78   | 0.80     | 0.018491 | 76       | 0.81     | 0.068946 |          |
| 254796_at   | Ak4g13000 | outative protein protein kinase homolo                                                | 62   | 65   | 72   | 75   | 64   | 66   | 67   | 68   | 0.98     | 0.734531 | 57   | 78   | 71   | 88   | 56   | 61   | 69   | 69   | 69   | 67   | 1.03     | 0.835446 | 68       | 1.01     | 0.968738 |          |
| 254797_at   | Ak4g13030 | putative protein                                                                      | 45   | 59   | 20   | 23   | 14   | 44   | 19   | 23   | 0.91     | 0.048841 | 63   | 85   | 59   | 37   | 34   | 28   | 45   | 48   | 69   | 38   | 1.80     | 0.00665  | 33       | 2.11     | 0.012309 |          |
| 254798_at   | Ak4g13050 | oleoyl-acyl-carrier-protein) hydrolyase I acyl-(acyl carrier protein) thioesterase, p | 61   | 84   | 67   | 99   | 104  | 91   | 71   | 98   | 0.72     | 0.027089 | 72   | 69   | 71   | 100  | 90   | 74   | 76   | 84   | 71   | 85   | 0.83     | 0.064904 | 88       | 0.80     | 0.082623 |          |
| 254799_at   | Ak4g13060 | putative protein various predicted prot F-box family protein-related                  | 41   | 54   | 49   | 46   | 45   | 49   | 47   | 1.05 | 0.618009 | 38       | 38   | 43   | 36   | 41   | 38   | 49   | 45   | 40   | 40   | 1.00 | 0.984074 | 35       | 1.13     | 0.162648 |          |          |
| 254800_at   | Ak4g13070 | outative protein several hypothetical on orou II intron solichio factor CRS1-relat    | 22   | 31   | 38   | 42   | 43   | 35   | 30   | 40   | 0.76     | 0.134644 | 28   | 29   | 31   | 44   | 31   | 27   | 35   | 31   | 29   | 33   | 0.88     | 0.342915 | 34       | 0.87     | 0.456440 |          |
| 254801_at   | Ak4g13080 | endoxvulcan transferase-like protei volucan:volucosol transferase, out                | 28   | 41   | 44   | 39   | 51   | 48   | 38   | 46   | 0.82     | 0.249867 | 28   | 33   | 34   | 32   | 28   | 24   | 30   | 28   | 31   | 28   | 1.00     | 0.320331 | 28       | 1.11     | 0.395480 |          |
| 254802_at   | Ak4g13090 | endoxvulcan transferase-like protei volucan:volucosol transferase, out                | 30   | 34   | 47   | 41   | 42   | 32   | 37   | 38   | 0.96     | 0.820141 | 28   | 37   | 32   | 35   | 30   | 24   | 40   | 35   | 32   | 33   | 0.98     | 0.873757 | 30       | 1.09     | 0.579525 |          |
| 254803_at   | Ak4g13100 | putative protein several hypothetical on zinc finger (C3HC4-type RING finger) fa      | 203  | 319  | 238  | 317  | 373  | 287  | 253  | 326  | 0.78     | 0.162578 | 308  | 355  | 352  | 523  | 476  | 384  | 531  | 422  | 339  | 467  | 0.72     | 0.017157 | 461      | 0.73     | 0.047528 |          |
| 254804_at   | Ak4g13010 | putative protein putative oxidoreductas oxidoreductase, zinc-binding dehydro          | 343  | 374  | 424  | 515  | 435  | 399  | 381  | 450  | 0.85     | 0.173366 | 395  | 475  | 449  | 737  | 467  | 398  | 432  | 426  | 440  | 492  | 0.89     | 0.562555 | 534      | 0.82     | 0.425858 |          |
| 254777_at   | Ak4g12960 | putative protein hypothetical protein - / gamma interferon responsive lysosomal       | 7366 | 7723 | 8795 | 9218 | 9439 | 8936 | 7968 | 9198 | 0.87     | 0.051910 | 6764 | 7026 | 7488 | 8607 | 7441 | 6672 | 8616 | 8696 | 7993 | 8006 | 0.89     | 0.155377 | 7573     | 0.94     | 0.468904 |          |
| 254746_at   | Ak4g12980 | outative protein hydrovthal protein, / austin-oxenase protein, putative               | 560  | 687  | 815  | 894  | 942  | 678  | 687  | 838  | 0.82     | 0.240325 | 536  | 553  | 563  | 1027 | 772  | 664  | 687  | 699  | 551  | 770  | 0.72     | 0.049445 | 821      | 0.67     | 0.066375 |          |
| 254747_at   | Ak4g12980 | serine/threonine-specific protein kinase serine/threonine protein kinase (MHK)        | 184  | 249  | 288  | 229  | 265  | 188  | 241  | 228  | 1.06     | 0.746460 | 218  | 207  | 209  | 216  | 203  | 159  | 231  | 159  | 231  | 211  | 203      | 1.04     | 0.614874 | 193      | 1.09     | 0.353612 |
| 254748_at   | Ak4g13120 | unknown protein                                                                       | 81   | 100  | 96   | 103  | 117  | 86   | 92   | 102  | 0.91     | 0.424525 | 80   | 65   | 87   | 95   | 81   | 87   | 77   | 78   | 86   | 86   | 0.90     | 0.230413 | 89       | 0.87     | 0.210763 |          |
| 254749_at   | Ak4g13130 | putative protein various predicted prot DC1 domain-containing protein                 | 41   | 51   | 54   | 49   | 46   | 45   | 49   | 47   | 1.05     | 0.618009 | 38   | 38   | 43   | 36   | 41   | 38   | 49   | 45   | 40   | 40   | 1.00     | 0.984074 | 35       | 1.13     | 0.162648 |          |
| 254750_at   | Ak4g13140 | putative protein                                                                      | 291  | 327  | 488  | 442  | 508  | 482  | 369  | 477  | 0.77     | 0.163161 | 306  | 382  | 386  | 559  | 436  | 397  | 447  | 440  | 358  | 456  | 0.79     | 0.054564 | 464      | 0.77     | 0.128381 |          |
| 254751_at   | Ak4g13150 | hypothetical protein                                                                  | 35   | 42   | 51   | 54   | 59   | 51   | 42   | 55   | 0.78     | 0.080646 | 26   | 37   | 40   | 50   | 37   | 39   | 39   | 35   | 35   | 40   | 0.87     | 0.302532 | 41       | 0.83     | 0.302895 |          |
| 254752_at   | Ak4g13160 | outative protein IFA-binding protein - A expressed protein                            | 56   | 88   | 103  | 96   | 101  | 74   | 82   | 90   | 0.91     | 0.641448 | 43   | 62   | 56   | 99   | 61   | 63   | 70   | 65   | 54   | 72   | 0.75     | 0.128395 | 75       | 0.72     | 0.197868 |          |
| 254753_at   | Ak4g13190 | outative protein Pto kinase interactor 1 protein kinase family protein                | 59   | 78   | 77   | 62   | 72   | 56   | 71   | 63   | 1.13     | 0.066776 | 72   | 61   | 61   | 46   | 40   | 43   | 54   | 46   | 65   | 46   | 1.42     | 0.033565 | 43       | 1.51     | 0.060806 |          |
| 254754_at   | Ak4g13200 | octate vase like protein octate vase family protein                                   | 35   | 47   | 29   | 35   | 28   | 35   | 31   | 27   | 0.91     | 0.070262 | 40   | 55   | 54   | 61   | 46   | 53   | 52   | 56   | 52   | 63   | 0.99     | 0.923682 | 50       | 1.05     | 0.423680 |          |
| 254755_at   | Ak4g13220 | hypothetical protein                                                                  | 144  | 149  | 207  | 213  | 219  | 189  | 167  | 207  | 0.81     | 0.146626 | 127  | 170  | 225  | 233  | 183  | 195  | 150  | 176  | 174  | 210  | 0.93     | 0.837452 | 203      | 0.85     | 0.406011 |          |
| 254756_at   | Ak4g13235 | putative protein late embriovogenesis at hypothetical protein                         | 23   | 25   | 44   | 44   | 40   | 41   | 31   | 42   | 0.74     | 0.183201 | 20   | 28   | 29   | 24   | 22   | 25   | 27   | 22   | 26   | 24   | 1.07     | 0.526931 | 24       | 1.09     | 0.521242 |          |
| 254757_at   | Ak4g13240 | putative protein other putative or hypotf hypothetical protein                        | 27   | 42   | 30   | 35   | 27   | 33   | 33   | 32   | 1.04     | 0.806322 | 33   | 42   | 38   | 27   | 26   | 23   | 40   | 30   | 38   | 29   | 1.30     | 0.09451  | 25       | 1.50     | 0.013986 |          |
| 254758_at   | Ak4g13260 | outative protein dimethylamine mono flavin-containing monooxygenase / FMC             | 61   | 76   | 94   | 83   | 97   | 94   | 77   | 89   | 0.86     | 0.230604 | 49   | 55   | 54   | 61   | 46   | 53   | 62   | 56   | 52   | 60   | 0.99     | 0.923682 | 50       | 1.05     | 0.423680 |          |
| 254759_at   | Ak4g13180 | short-chain alcohol dehydroenase like short-chain dehydroenase/reductase (c           | 72   | 83   | 115  | 110  | 82   | 86   | 90   | 92   | 0.97     | 0.874731 | 69   | 78   | 100  | 65   | 51   | 45   | 92   | 90   | 82   | 68   | 1.20     | 0.374015 | 54       | 1.53     | 0.054696 |          |
| 254760_at   | Ak4g13200 | putative protein hydrovthal protein all expressed protein                             | 181  | 260  | 260  | 247  | 281  | 216  | 234  | 248  | 0.94     | 0.688359 | 268  | 266  | 248  | 377  | 289  | 283  | 313  | 313  | 261  | 315  | 0.85     | 0.032525 | 516      | 0.82     | 0.146495 |          |
| 254761_at   | Ak4g13195 | Expressed protein : supported by full-ile expressed protein                           | 99   | 120  | 126  | 90   | 101  | 85   | 115  | 92   | 1.25     | 0.096087 | 151  | 154  | 151  | 141  | 115  | 108  | 98   | 85   | 152  | 109  | 1.39     | 0.014828 | 121      | 1.25     | 0.040083 |          |
| 254762_at   | Ak4g13200 | Expressed protein : supported by full-ile embriovogenesis abundant domain- $\alpha$   | 48   | 63   | 71   | 56   | 61   | 65   | 61   | 60   | 1.00     | 0.973331 | 46   | 68   | 65   | 65   | 46   | 63   | 68   | 56   | 66   | 56   | 1.06     | 0.964336 | 52       | 1.14     | 0.153501 |          |
| 254763_at   | Ak4g13170 | ribosomal protein L13a like protein ribc 60S ribosomal protein L13A (RPL13aC)         | 861  | 975  | 1073 | 1178 | 1180 | 1110 | 969  | 1156 | 0.84     | 0.046807 | 1002 | 1260 | 1208 | 1570 | 1213 | 1123 | 1138 | 1134 | 1157 | 1236 | 0.94     | 0.556455 | 1302     | 0.89     | 0.408073 |          |
| 254764_at   | Ak4g13250 | outative protein : supported by cDNA : short-chain dehydroenase/reductase (c          | 381  | 537  | 642  | 626  | 632  | 506  | 520  | 588  | 0.88     | 0.472467 | 452  | 525  | 476  | 712  | 602  | 543  | 809  | 773  | 484  | 688  | 0.70     | 0.025562 | 619      | 0.78     | 0.066635 |          |
| 254765_at   | Ak4g13270 | hypothetical protein                                                                  | 252  | 340  | 388  | 428  | 460  | 350  | 327  | 412  | 0.79     | 0.172004 | 308  | 347  | 355  | 476  | 412  | 389  | 340  | 349  | 337  | 393  | 0.86     | 0.153073 | 425      | 0.79     | 0.041335 |          |
| 254766_at   | Ak4g13280 | outative protein predicted protein, Arat trepase synthase/cyclase family protein      | 25   | 27   | 17   | 20   | 15   | 20   | 23   | 18   | 1.26     | 0.230128 | 14   | 24   | 28   | 20   | 13   | 14   | 19   | 22   | 16   | 1.36 | 0.163556 | 16       | 1.37     | 0.279699 |          |          |
| 254767_s_at | Ak4g13260 | cytochrome p450 - like protein cytocho P450 11A19, putative / CYP                     | 10   | 12   | 17   | 18   | 12   | 10   | 17   | 16   | 0.70     | 0.083806 | 17   | 11   | 10   | 8    | 12   | 14   | 11   | 10   | 12   | 10   | 1.33     | 0.094802 | 11       | 1.05     | 0.076655 |          |
| 254768_at   | Ak4g13320 | hypothetical protein                                                                  | 22   | 24   | 25   | 28   | 30   | 33   | 24   | 30   | 0.78     | 0.012444 | 20   | 22   | 27   | 21   | 22   | 20   | 23   | 24   | 23   | 22   | 1.05     | 0.541890 | 21       | 1.10     | 0.396450 |          |
| 254769_at   | Ak4g13330 | hypothetical protein                                                                  | 80   | 103  | 119  | 112  | 112  | 104  | 100  | 109  | 0.92     | 0.487422 | 71   | 67   | 83   | 90   | 71   | 72   | 77   | 80   | 74   | 78   | 0.94     | 0.488822 | 78       | 0.95     | 0.647411 |          |
| 254770_at   | Ak4g13340 | extensin-like protein extensin-like protc leucine-rich repeat family protein / exten  | 58   | 33   | 55   | 45   | 45   | 44   | 49   | 45   | 1.09     | 0.620119 | 62   | 73   | 52   | 101  | 60   | 49   | 69   | 75   | 62   | 71   | 0.88     | 0.524732 | 70       | 0.89     | 0.677125 |          |
| 254771_at   | Ak4g13380 | hypothetical protein                                                                  | 4    | 5    | 6    | 5    | 4    | 5    | 4    | 5    | 0.80     | 0.070868 | 4    | 5    | 4    | 5    | 2    | 4    | 5    | 4    | 5    | 4    | 1.27     | 0.468891 | 4        | 1.20     | 0.954547 |          |
| 254772_at   | Ak4g13390 | extensin-like protein extensin class I c protine-rich extensin-like family protein    | 23   | 23   | 23   | 21   | 25   | 17   | 23   | 21   | 1.08     | 0.500076 | 26   | 18   | 25   | 23   | 20   | 25   | 21   | 27   | 23   | 23   | 0.99     | 0.957631 | 23       | 1.02     | 0.898832 |          |
| 254773_at   | Ak4g13410 | putative protein Cyclic beta-1,3-gl                                                   |      |      |      |      |      |      |      |      |          |          |      |      |      |      |      |      |      |      |      |      |          |          |          |          |          |          |

|             |           |                                                                                           |                                                                                           |      |      |      |      |      |      |      |      |          |          |      |      |      |      |      |      |      |      |      |      |          |          |          |          |          |          |
|-------------|-----------|-------------------------------------------------------------------------------------------|-------------------------------------------------------------------------------------------|------|------|------|------|------|------|------|------|----------|----------|------|------|------|------|------|------|------|------|------|------|----------|----------|----------|----------|----------|----------|
| 254696_at   | Ak4g17930 | hypothetical protein                                                                      | hypothetical protein                                                                      | 25   | 7    | 6    | 6    | 11   | 9    | 7    | 9    | 0.81     | 0.357996 | 11   | 8    | 10   | 12   | 12   | 7    | 8    | 7    | 10   | 9    | 1.05     | 0.771137 | 10       | 0.93     | 0.677493 |          |
| 254697_at   | Ak4g17970 | putative protein predicted protein, Araf expressed protein                                | putative protein                                                                          | 8    | 31   | 37   | 30   | 40   | 33   | 31   | 34   | 0.90     | 0.494236 | 22   | 30   | 31   | 23   | 30   | 23   | 27   | 26   | 28   | 26   | 1.07     | 0.528164 | 25       | 1.10     | 0.520889 |          |
| 254698_at   | Ak4g17980 | NAM (no azical meristem) - like protein no azical meristem (NAM) family protein           | NAM (no azical meristem) - like protein no azical meristem (NAM) family protein           | 25   | 57   | 58   | 55   | 59   | 60   | 51   | 58   | 0.87     | 0.353478 | 30   | 34   | 34   | 39   | 34   | 34   | 39   | 35   | 33   | 36   | 0.91     | 0.123449 | 36       | 0.91     | 0.241866 |          |
| 254699_at   | Ak4g17990 | putative protein predicted protein, Araf expressed protein                                | putative protein                                                                          | 29   | 34   | 31   | 42   | 33   | 31   | 34   | 35   | 0.83     | 0.271055 | 21   | 21   | 21   | 27   | 27   | 27   | 28   | 28   | 25   | 23   | 1.11     | 0.420103 | 24       | 1.11     | 0.437546 |          |
| 254700_at   | Ak4g18000 | hypothetical protein                                                                      | hypothetical protein                                                                      | 46   | 54   | 63   | 67   | 63   | 54   | 62   | 68   | 0.88     | 0.273305 | 47   | 54   | 87   | 46   | 44   | 51   | 44   | 45   | 63   | 46   | 1.36     | 0.125153 | 47       | 1.34     | 0.281648 |          |
| 254701_at   | Ak4g18030 | putative protein predicted protein, Araf dehydration-responsive family protein            | putative protein                                                                          | 624  | 660  | 675  | 899  | 962  | 809  | 653  | 890  | 0.73     | 0.007203 | 568  | 506  | 579  | 838  | 715  | 572  | 626  | 634  | 551  | 677  | 0.81     | 0.095376 | 708      | 0.78     | 0.120247 |          |
| 254702_at   | Ak4g17940 | putative protein predicted protein, Araf expressed protein                                | putative protein                                                                          | 609  | 442  | 463  | 505  | 607  | 449  | 605  | 520  | 0.78     | 0.158811 | 452  | 506  | 444  | 724  | 580  | 597  | 552  | 528  | 471  | 596  | 0.78     | 0.036187 | 634      | 0.74     | 0.027612 |          |
| 254703_at   | Ak4g17960 | putative protein predicted protein, Araf expressed protein                                | putative protein                                                                          | 95   | 142  | 114  | 176  | 189  | 147  | 129  | 174  | 0.74     | 0.198919 | 98   | 142  | 116  | 176  | 149  | 132  | 117  | 132  | 116  | 149  | 0.80     | 0.109659 | 149      | 0.81     | 0.046841 |          |
| 254704_at   | Ak4g18020 | putative protein predicted protein, Araf expressed protein                                | putative protein                                                                          | 302  | 425  | 401  | 503  | 480  | 407  | 376  | 463  | 0.81     | 0.140993 | 311  | 298  | 327  | 437  | 361  | 308  | 418  | 408  | 312  | 386  | 0.81     | 0.056849 | 369      | 0.85     | 0.214072 |          |
| 254705_at   | Ak4g17870 | outative protein : supported by cDNA: - expressed protein                                 | outative protein                                                                          | 519  | 597  | 538  | 431  | 520  | 461  | 552  | 471  | 1.17     | 0.081492 | 396  | 516  | 400  | 832  | 653  | 592  | 627  | 437  | 672  | 672  | 0.65     | 0.009448 | 603      | 0.63     | 0.035847 |          |
| 254706_at   | Ak4g17950 | outative protein DNA-binding protein P DNA-binding protein                                | outative protein                                                                          | 387  | 418  | 444  | 588  | 621  | 494  | 416  | 568  | 0.73     | 0.021615 | 421  | 427  | 433  | 704  | 503  | 494  | 496  | 427  | 542  | 542  | 0.79     | 0.077791 | 574      | 0.74     | 0.087862 |          |
| 254707_at   | Ak4g18010 | putative protein nositol polyphosphate nositol polyphosphate 5-phosphatase II             | putative protein                                                                          | 34   | 44   | 41   | 83   | 66   | 75   | 40   | 74   | 0.53     | 0.271055 | 48   | 57   | 52   | 87   | 59   | 59   | 88   | 84   | 52   | 75   | 0.89     | 0.045278 | 68       | 0.77     | 0.171458 |          |
| 254708_at   | Ak4g17895 | ubiquitin-specific protease 20 (UBP20) ubiquitin-specific protease 20, putative I         | ubiquitin-specific protease 20 (UBP20) ubiquitin-specific protease 20, putative I         | 152  | 165  | 171  | 180  | 185  | 165  | 163  | 176  | 0.92     | 0.174857 | 134  | 118  | 139  | 195  | 153  | 168  | 150  | 130  | 158  | 158  | 0.82     | 0.061728 | 158      | 0.83     | 0.157726 |          |
| 254709_at   | Ak4g17890 | Expressed protein : supported by cDNA human Rev interacting-like family protein           | Expressed protein                                                                         | 263  | 376  | 354  | 387  | 426  | 321  | 331  | 378  | 0.88     | 0.368730 | 288  | 263  | 289  | 417  | 333  | 310  | 313  | 296  | 280  | 334  | 0.84     | 0.117343 | 353      | 0.79     | 0.094260 |          |
| 254710_at   | Ak4g18050 | multidrug resistance proteinP-qlcovar ABC transporter family protein                      | multidrug resistance proteinP-qlcovar ABC transporter family protein                      | 59   | 61   | 83   | 37   | 32   | 35   | 67   | 35   | 1.93     | 0.014933 | 42   | 48   | 51   | 28   | 23   | 23   | 24   | 26   | 47   | 25   | 1.90     | 0.000079 | 25       | 1.91     | 0.002164 |          |
| 254711_at   | Ak4g18060 | putative protein SH3 domain-containing protein 3 (SH3P)                                   | putative protein                                                                          | 479  | 595  | 517  | 626  | 739  | 549  | 530  | 638  | 0.83     | 0.173733 | 466  | 445  | 489  | 648  | 607  | 509  | 587  | 519  | 467  | 574  | 0.81     | 0.025779 | 588      | 0.79     | 0.048083 |          |
| 254712_at   | Ak4g18080 | hypothetical protein                                                                      | hypothetical protein                                                                      | 22   | 29   | 36   | 38   | 40   | 38   | 29   | 38   | 0.76     | 0.084050 | 23   | 17   | 27   | 27   | 24   | 22   | 25   | 22   | 24   | 0.94 | 0.569287 | 24       | 0.91     | 0.568645 |          |          |
| 254713_at   | Ak4g18090 | hypothetical protein                                                                      | hypothetical protein                                                                      | 22   | 25   | 39   | 35   | 35   | 40   | 29   | 37   | 0.78     | 0.228929 | 13   | 15   | 20   | 18   | 14   | 16   | 15   | 16   | 16   | 16   | 1.00     | 0.973032 | 16       | 0.99     | 0.919070 |          |
| 254714_at   | Ak4g18120 | putative protein MeI2-like protein, Arab RNA recognition motif (RRM)-containing           | putative protein                                                                          | 483  | 809  | 743  | 746  | 977  | 672  | 678  | 798  | 0.85     | 0.425587 | 547  | 623  | 545  | 796  | 681  | 595  | 823  | 801  | 572  | 739  | 0.77     | 0.034051 | 691      | 0.83     | 0.135325 |          |
| 254800_at   | Ak4g18130 | phytochrome E (PHYE)                                                                      | phytochrome E (PHYE)                                                                      | 307  | 460  | 425  | 539  | 574  | 411  | 397  | 508  | 0.78     | 0.178023 | 369  | 270  | 388  | 525  | 426  | 361  | 468  | 454  | 342  | 447  | 0.77     | 0.057613 | 437      | 0.78     | 0.188389 |          |
| 254881_at   | Ak4g18140 | putative protein Hya22 protein, Homo NL1 interacting factor (NIF) family protein          | putative protein                                                                          | 104  | 147  | 157  | 141  | 169  | 103  | 136  | 138  | 0.99     | 0.944166 | 117  | 130  | 133  | 179  | 141  | 116  | 179  | 164  | 127  | 156  | 0.81     | 0.125281 | 145      | 0.87     | 0.377735 |          |
| 254651_at   | Ak4g18160 | potassium channel - like protein kco1, outward rectifying potassium channel, $\alpha$     | potassium channel - like protein kco1, outward rectifying potassium channel, $\alpha$     | 105  | 153  | 185  | 206  | 204  | 171  | 147  | 194  | 0.76     | 0.148354 | 89   | 91   | 108  | 152  | 139  | 131  | 138  | 137  | 96   | 139  | 0.69     | 0.000564 | 141      | 0.68     | 0.007131 |          |
| 254652_at   | Ak4g18170 | DNA bindino-like protein SPF1 protein, WRKY family transcription factor                   | DNA bindino-like protein SPF1 protein, WRKY family transcription factor                   | 48   | 48   | 67   | 53   | 61   | 68   | 61   | 61   | 1.01     | 0.978526 | 70   | 52   | 65   | 45   | 38   | 49   | 100  | 89   | 62   | 64   | 0.97     | 0.901434 | 44       | 1.00     | 0.046414 |          |
| 254653_at   | Ak4g18180 | colivalacturonase-like protein exocovyl aldohexose hydrolase family 28 protein / o        | colivalacturonase-like protein exocovyl aldohexose hydrolase family 28 protein / o        | 54   | 61   | 66   | 54   | 61   | 64   | 57   | 60   | 0.96     | 0.678364 | 41   | 54   | 55   | 42   | 39   | 40   | 65   | 56   | 50   | 48   | 1.03     | 0.850365 | 40       | 1.24     | 0.106441 |          |
| 254654_at   | Ak4g18040 | translational initiation factor eIF4E - suppo eukaryotic translation initiation factor 4E | translational initiation factor eIF4E - suppo eukaryotic translation initiation factor 4E | 904  | 966  | 1029 | 1167 | 1231 | 1026 | 967  | 1141 | 0.85     | 0.068406 | 1093 | 1183 | 1197 | 1642 | 1246 | 1246 | 1185 | 1191 | 1158 | 1302 | 0.89     | 0.265385 | 1378     | 0.84     | 0.190099 |          |
| 254655_s_at | Ak4g18100 | ribosomal protein L32 - like protein ribo 60S ribosomal protein L32 (RPL32A) ///          | ribosomal protein L32 - like protein ribo 60S ribosomal protein L32 (RPL32A) ///          | 2962 | 3658 | 3666 | 3664 | 3745 | 3354 | 3428 | 3588 | 0.96     | 0.576221 | 2616 | 3102 | 2981 | 3641 | 2821 | 2675 | 3446 | 3522 | 2900 | 3221 | 0.90     | 0.299077 | 3046     | 0.95     | 0.684455 |          |
| 254656_at   | Ak4g18070 | putative protein : supported by full-length expressed protein                             | putative protein                                                                          | 279  | 282  | 309  | 519  | 543  | 483  | 290  | 515  | 0.56     | 0.000362 | 307  | 326  | 333  | 595  | 487  | 413  | 411  | 386  | 322  | 458  | 0.70     | 0.036814 | 498      | 0.65     | 0.029589 |          |
| 254657_s_at | Ak4g18210 | cutative protein W15DMY32F, W25D0 purine deermase family protein /// purine               | cutative protein W15DMY32F, W25D0 purine deermase family protein /// purine               | 54   | 52   | 97   | 151  | 139  | 129  | 68   | 140  | 0.48     | 0.010990 | 54   | 61   | 66   | 152  | 114  | 103  | 114  | 104  | 60   | 117  | 0.51     | 0.003221 | 123      | 0.49     | 0.014247 |          |
| 254658_at   | Ak4g18230 | cutative protein chredone gene M0257 expressed protein                                    | cutative protein                                                                          | 175  | 248  | 283  | 256  | 317  | 215  | 238  | 262  | 0.90     | 0.573830 | 227  | 260  | 275  | 346  | 259  | 285  | 269  | 254  | 254  | 283  | 0.90     | 0.289220 | 297      | 0.86     | 0.223074 |          |
| 254659_at   | Ak4g18250 | starch synthase-like protein bacterial $\alpha$ starch synthase-related protein           | starch synthase-like protein bacterial $\alpha$ starch synthase-related protein           | 125  | 181  | 177  | 153  | 152  | 169  | 181  | 153  | 0.95     | 0.554877 | 135  | 119  | 140  | 147  | 107  | 152  | 137  | 131  | 136  | 147  | 0.97     | 0.718431 | 150      | 1.01     | 0.906052 |          |
| 254660_at   | Ak4g18260 | receptor serine/threonine kinase-like p receptor serine/threonine kinase, putativ         | receptor serine/threonine kinase-like p receptor serine/threonine kinase, putativ         | 15   | 17   | 21   | 20   | 18   | 18   | 20   | 0.88 | 0.224847 | 19       | 17   | 15   | 15   | 14   | 13   | 16   | 16   | 17   | 15   | 1.15 | 0.100122 | 14       | 1.22     | 0.079797 |          |          |
| 254661_at   | Ak4g18260 | unknown protein M01222 resistance 1 cytochrome B561-related                               | unknown protein                                                                           | 91   | 98   | 103  | 102  | 92   | 84   | 106  | 80   | 0.93     | 0.193175 | 92   | 113  | 104  | 159  | 114  | 105  | 107  | 101  | 103  | 117  | 0.88     | 0.382077 | 126      | 0.82     | 0.260123 |          |
| 254662_at   | Ak4g18270 | putative protein phospho-N-acetylmutr glycolysis transferase family 4 protein             | putative protein                                                                          | 82   | 93   | 113  | 120  | 139  | 101  | 96   | 120  | 0.80     | 0.162633 | 81   | 75   | 79   | 102  | 85   | 93   | 115  | 102  | 78   | 99   | 0.79     | 0.195987 | 94       | 0.84     | 0.042290 |          |
| 254663_at   | Ak4g18280 | potassium channel protein KAT2, $\alpha$ inward rectifying potassium channel (KA          | potassium channel protein KAT2, $\alpha$ inward rectifying potassium channel (KA          | 16   | 16   | 26   | 28   | 21   | 21   | 14   | 22   | 0.64     | 0.024100 | 11   | 10   | 11   | 15   | 14   | 10   | 10   | 10   | 10   | 13   | 0.80     | 0.957218 | 14       | 0.75     | 0.068645 |          |
| 254664_at   | Ak4g18300 | initiation factor 2Bexon-like protein i eIF-4gamma/eIF5/eIF2-eoslon domain- $\alpha$      | initiation factor 2Bexon-like protein i eIF-4gamma/eIF5/eIF2-eoslon domain- $\alpha$      | 72   | 94   | 111  | 107  | 107  | 90   | 92   | 101  | 0.91     | 0.520861 | 96   | 78   | 91   | 127  | 98   | 91   | 123  | 107  | 88   | 109  | 0.81     | 0.082686 | 105      | 0.84     | 0.234284 |          |
| 254665_at   | Ak4g18340 | beta-1.3-glucanase-like protein strong glycosyl hydrolase family 17 protein               | beta-1.3-glucanase-like protein strong glycosyl hydrolase family 17 protein               | 18   | 31   | 28   | 30   | 40   | 32   | 26   | 34   | 0.76     | 0.171152 | 37   | 37   | 31   | 56   | 50   | 49   | 49   | 47   | 43   | 55   | 0.49     | 0.71     | 0.020898 | 52       | 0.68     | 0.004116 |
| 254666_at   | Ak4g18330 | translational initiation factor eIF-2 gamma eukaryotic translation initiation factor 2 s  | translational initiation factor eIF-2 gamma eukaryotic translation initiation factor 2 s  | 40   | 45   | 60   | 63   | 60   | 57   | 48   | 60   | 0.81     | 0.141054 | 55   | 53   | 59   | 89   | 66   | 66   | 65   | 59   | 56   | 69   | 0.81     | 0.109659 | 73       | 0.76     | 0.086308 |          |
| 254667_at   | Ak4g18350 | chitin rich cell wall protein like glycyl glycolysis rich cell wall protein-related       | chitin rich cell wall protein like glycyl glycolysis rich cell wall protein-related       | 98   | 102  | 174  | 142  | 155  | 128  | 142  | 0.88 | 0.550497 | 63       | 55   | 74   | 80   | 142  | 68   | 69   | 82   | 64   | 75   | 68   | 0.65     | 0.157794 | 70       | 0.61     | 0.469385 |          |
| 254668_at   | Ak4g18350 | neoxanthin cleavage enzyme - like pro B-cis-epoxycarotenoid dioxygenase, put              | neoxanthin cleavage enzyme - like pro B-cis-epoxycarotenoid dioxygenase, put              | 15   | 18   | 22   | 21   | 22   | 24   | 18   | 22   | 0.82     | 0.147917 | 17   | 14   | 20   | 19   | 14   | 16   | 16   | 15   | 17   | 16   | 1.03     | 0.816585 | 17       | 0.99     | 0.923400 |          |
| 254669_at   | Ak4g18370 | HhO protease precursor, putative dipeptide hydrolase HhO, chloroplast (SPPA) (HH          | HhO protease precursor, putative dipeptide hydrolase HhO, chloroplast (SPPA) (HH          | 197  | 355  | 307  | 290  | 376  | 272  | 286  | 313  | 0.91     | 0.663573 | 287  | 310  | 295  | 347  | 327  | 300  | 345  | 342  | 298  | 332  | 0.90     | 0.034683 | 325      | 0.92     | 0.150065 |          |
| 254670_at   | Ak4g18390 | teosinte branched 1 - like protein teosir TCP family transcription factor, putative       | teosinte branched 1 - like protein teosir TCP family transcription factor, putative       | 195  | 229  | 275  | 312  | 330  | 288  | 233  | 310  | 0.75     | 0.041669 | 233  | 273  | 249  | 456  | 369  | 318  | 424  | 420  | 252  | 398  | 0.63     | 0.004778 | 381      | 0.66     | 0.036780 |          |
| 254671_at   | Ak4g18410 | MADR transposable element - like rot SWAP (Su(wo)scorer-of-White-Africanus)               | MADR transposable element - like rot SWAP (Su(wo)scorer-of-White-Africanus)               | 25   | 29   | 33   | 29   | 41   | 29   | 29   | 33   | 0.88     | 0.422043 | 20   | 21   | 23   | 25   | 21   | 26   | 25   | 24   | 21   | 24   | 0.98     | 0.047800 | 24       | 0.89     | 0.155402 |          |
| 254672_at   | Ak4g18420 | hypothetical protein                                                                      | hypothetical protein                                                                      | 23   | 27   | 33   | 32   | 37   | 40   | 27   | 37   | 0.72     | 0.053014 | 21   | 24   | 25   | 27   | 22   | 24   | 22   | 22   | 24   | 22   | 1.08     | 0.469889 | 24       | 1.08     | 0.850078 |          |
| 254673_at   | Ak4g18430 | membrane-bound small GTP-binding - Ras-related GTP-binding protein, putativ               | membrane-bound small GTP-binding - Ras-related GTP-binding protein, putativ               | 25   | 27   | 42   | 42   | 40   | 40   | 31   | 41   | 0.77     | 0.152029 | 26   | 27   | 30   | 27   | 21   | 26   | 27   | 27   | 26   | 1.04 | 0.589730 | 26       | 1.05     | 0.639270 |          |          |
| 254674_at   | Ak4g18450 | EREBP - like protein EREBP-1 (Ethyle EREBP - like protein EREBP-1 (Ethyle                 | EREBP - like protein EREBP-1 (Ethyle EREBP - like protein EREBP-1 (Ethyle                 | 21   | 24   | 39   | 34   | 37   | 3    |      |      |          |          |      |      |      |      |      |      |      |      |      |      |          |          |          |          |          |          |

|             |           |                                                     |                                                                   |     |      |     |      |      |     |      |          |          |          |     |      |      |      |     |     |     |     |      |          |          |           |          |          |          |          |
|-------------|-----------|-----------------------------------------------------|-------------------------------------------------------------------|-----|------|-----|------|------|-----|------|----------|----------|----------|-----|------|------|------|-----|-----|-----|-----|------|----------|----------|-----------|----------|----------|----------|----------|
| 254602_at   | Ak4g19040 | hypothetical protein                                | pleckstrin homology (PH) domain-contai                            | 310 | 380  | 350 | 379  | 465  | 358 | 347  | 401      | 0.87     | 0.233318 | 272 | 249  | 305  | 396  | 359 | 284 | 375 | 354 | 275  | 354      | 0.78     | 0.030533  | 347      | 0.80     | 0.125037 |          |
| 254603_at   | Ak4g19050 | putative protein                                    | hypothetical protein Y1 mbo1/phocin family protein                | 50  | 58   | 52  | 76   | 75   | 55  | 53   | 69       | 0.78     | 0.102935 | 69  | 62   | 78   | 106  | 79  | 71  | 71  | 70  | 70   | 70       | 79       | 0.88      | 0.352353 | 85       | 0.82     | 0.242726 |
| 254604_at   | Ak4g19070 | cadmium-induced protein                             | cadmium-responsive protein / cadmium                              | 90  | 133  | 147 | 161  | 177  | 143 | 123  | 160      | 0.77     | 0.129288 | 80  | 85   | 90   | 104  | 84  | 83  | 103 | 87  | 85   | 82       | 0.92     | 0.310307  | 90       | 0.94     | 0.512830 |          |
| 254605_at   | Ak4g19090 | putative protein                                    | protein kinase - like protein kinase, putative                    | 102 | 146  | 90  | 116  | 180  | 117 | 102  | 97       | 0.81     | 0.107161 | 79  | 117  | 134  | 164  | 116 | 110 | 109 | 110 | 89   | 108      | 1.00     | 0.005407  | 105      | 0.98     | 0.025899 |          |
| 254606_at   | Ak4g19030 | nodulin-26 - like protein                           | major intrinsic family protein / MIP family                       | 12  | 22   | 26  | 21   | 26   | 19  | 20   | 22       | 0.93     | 0.761187 | 18  | 20   | 15   | 15   | 12  | 15  | 21  | 15  | 18   | 15       | 1.13     | 0.383283  | 14       | 1.25     | 0.118493 |          |
| 254607_at   | Ak4g18920 | hypothetical protein                                | - supported by full- expressed protein                            | 25  | 35   | 42  | 46   | 48   | 44  | 34   | 46       | 0.74     | 0.080852 | 33  | 40   | 39   | 34   | 36  | 30  | 39  | 35  | 37   | 35       | 1.07     | 0.364395  | 33       | 1.12     | 0.212878 |          |
| 254608_at   | Ak4g18910 | major intrinsic protein (MIP)- like nodul aquaporin | / NOD26-like major int                                            | 328 | 485  | 561 | 329  | 357  | 230 | 458  | 305      | 1.50     | 0.123637 | 471 | 614  | 436  | 456  | 369 | 377 | 442 | 435 | 507  | 416      | 1.22     | 0.098150  | 401      | 1.26     | 0.158283 |          |
| 254609_at   | Ak4g18970 | expressed protein                                   | putative protein                                                  | 404 | 449  | 540 | 354  | 368  | 440 | 404  | 409      | 0.91     | 0.189342 | 568 | 731  | 423  | 459  | 259 | 291 | 421 | 427 | 259  | 259      | 2.27     | 0.003081  | 327      | 2.19     | 0.026245 |          |
| 254610_at   | Ak4g18800 | putative protein                                    | predicted protein, Arab brassinosteroid signalling positive regul | 184 | 211  | 194 | 284  | 304  | 228 | 196  | 265      | 0.74     | 0.042497 | 107 | 122  | 133  | 218  | 153 | 139 | 125 | 118 | 121  | 151      | 0.80     | 0.265618  | 170      | 0.71     | 0.124034 |          |
| 254611_at   | Ak4g19095 | Expressed protein                                   | - supported by full-length expressed protein                      | 24  | 32   | 34  | 34   | 33   | 29  | 34   | 34       | 0.87     | 0.185110 | 29  | 26   | 32   | 32   | 22  | 24  | 20  | 25  | 29   | 27       | 1.08     | 0.437749  | 26       | 1.11     | 0.435486 |          |
| 254612_at   | Ak4g19100 | putative protein                                    | hypothetical protein all expressed protein                        | 136 | 253  | 191 | 154  | 177  | 120 | 194  | 150      | 1.29     | 0.310206 | 225 | 254  | 225  | 280  | 193 | 245 | 272 | 260 | 235  | 250      | 0.94     | 0.509366  | 239      | 0.98     | 0.873614 |          |
| 254613_at   | Ak4g19150 | ankyrin-like protein ankyrin 3                      | Mus mu ankyrin repeat family protein                              | 116 | 148  | 163 | 164  | 182  | 155 | 142  | 168      | 0.84     | 0.161976 | 118 | 132  | 134  | 185  | 145 | 138 | 143 | 162 | 128  | 153      | 0.84     | 0.145085  | 160      | 0.80     | 0.164587 |          |
| 254614_at   | Ak4g19190 | putative protein                                    | putative protein                                                  | 41  | 42   | 40  | 51   | 78   | 41  | 42   | 40       | 0.78     | 0.181892 | 30  | 29   | 32   | 35   | 30  | 32  | 34  | 35  | 30   | 33       | 0.91     | 0.087063  | 32       | 0.93     | 0.294611 |          |
| 254615_at   | Ak4g19210 | RNase L inhibitor-like protein                      | RNase L RNase L inhibitor protein, putative                       | 468 | 527  | 559 | 600  | 638  | 483 | 518  | 574      | 0.90     | 0.357801 | 386 | 316  | 401  | 486  | 433 | 363 | 449 | 431 | 368  | 432      | 0.85     | 0.095675  | 427      | 0.86     | 0.249635 |          |
| 254556_at   | Ak4g19220 | putative protein                                    | various predicted prot pentatricopeptide (PPR) repeat-containi    | 32  | 44   | 41  | 49   | 53   | 42  | 39   | 48       | 0.81     | 0.143958 | 39  | 28   | 39   | 39   | 38  | 37  | 38  | 35  | 35   | 37       | 0.94     | 0.454794  | 38       | 0.93     | 0.505113 |          |
| 254557_at   | Ak4g19140 | hypothetical protein                                | - supported by full- expressed protein                            | 301 | 362  | 399 | 412  | 483  | 351 | 354  | 416      | 0.85     | 0.264596 | 353 | 352  | 348  | 480  | 385 | 370 | 405 | 361 | 351  | 400      | 0.88     | 0.134342  | 412      | 0.85     | 0.155122 |          |
| 254558_at   | Ak4g19185 | Expressed protein                                   | - supported by full-length expressed protein                      | 281 | 311  | 321 | 356  | 393  | 300 | 349  | 349      | 0.87     | 0.210539 | 296 | 299  | 313  | 429  | 364 | 312 | 386 | 357 | 299  | 370      | 0.81     | 0.034529  | 368      | 0.81     | 0.114243 |          |
| 254559_at   | Ak4g19200 | putative protein                                    | divicine/ornithine-rich orn proline-rich family protein           | 481 | 516  | 782 | 722  | 793  | 660 | 593  | 725      | 0.82     | 0.266945 | 839 | 1048 | 910  | 1111 | 866 | 852 | 824 | 851 | 932  | 901      | 1.03     | 0.719493  | 943      | 0.99     | 0.923725 |          |
| 254560_at   | Ak4g19110 | kinase-like protein                                 | protein kinase rck, 1 protein kinase, putative                    | 328 | 373  | 447 | 531  | 567  | 449 | 382  | 515      | 0.74     | 0.054523 | 244 | 241  | 265  | 346  | 311 | 269 | 309 | 296 | 250  | 306      | 0.82     | 0.017757  | 330      | 0.81     | 0.066163 |          |
| 254561_at   | Ak4g19160 | putative protein                                    | - supported by cDNA - expressed protein                           | 370 | 624  | 665 | 549  | 689  | 456 | 553  | 565      | 0.98     | 0.923288 | 316 | 295  | 309  | 572  | 574 | 488 | 522 | 540 | 507  | 540      | 0.57     | 0.003043  | 545      | 0.56     | 0.001236 |          |
| 254562_at   | Ak4g19230 | cytochrome P450                                     | cytochrome P450, A cytochrome P450 family protein                 | 47  | 66   | 92  | 80   | 95   | 68  | 68   | 61       | 0.84     | 0.439086 | 302 | 339  | 317  | 47   | 54  | 43  | 43  | 45  | 38   | 42       | 0.93     | 0.4446203 | 47       | 0.89     | 0.311407 |          |
| 254563_at   | Ak4g19120 | putative protein                                    | several hypothetical protein                                      | 107 | 93   | 108 | 154  | 151  | 143 | 103  | 149      | 0.69     | 0.001437 | 135 | 131  | 151  | 175  | 134 | 111 | 139 | 132 | 139  | 138      | 1.01     | 0.567615  | 140      | 0.99     | 0.960844 |          |
| 254564_at   | Ak4g19170 | neoxanthin cleavage enzyme-like                     | orot 9-cis-oxocarotenoid dioxygenase, out                         | 33  | 41   | 58  | 47   | 52   | 46  | 44   | 49       | 0.91     | 0.596509 | 25  | 28   | 29   | 29   | 25  | 25  | 27  | 26  | 1.04 | 0.570352 | 26       | 1.03      | 0.740881 |          |          |          |
| 254565_at   | Ak4g19130 | reallocation A protein-like                         | reallocation or replication protein-related                       | 49  | 57   | 60  | 60   | 54   | 49  | 58   | 0.85     | 0.136289 | 46       | 44  | 47   | 50   | 40   | 36  | 58  | 46  | 46  | 46   | 0.99     | 0.962432 | 42        | 1.09     | 0.413068 |          |          |
| 254566_at   | Ak4g19240 | hypothetical protein                                | expressed protein                                                 | 802 | 1093 | 971 | 1075 | 1228 | 972 | 955  | 1092     | 0.57     | 0.291649 | 629 | 614  | 608  | 929  | 728 | 693 | 914 | 818 | 617  | 816      | 0.76     | 0.020714  | 763      | 0.79     | 0.087243 |          |
| 254567_s_at | Ak4g19260 | hypothetical protein                                | kelch repeat-containing F-box family pro                          | 7   | 9    | 10  | 10   | 11   | 8   | 9    | 9        | 0.94     | 0.724744 | 8   | 9    | 21   | 13   | 8   | 7   | 7   | 17  | 13   | 7        | 1.72     | 0.133808  | 17       | 1.73     | 0.264817 |          |
| 254568_x_at | Ak4g19300 | hypothetical protein                                | hypothetical protein /// hypothetical prote                       | 44  | 48   | 68  | 74   | 63   | 72  | 53   | 70       | 0.76     | 0.113126 | 33  | 37   | 47   | 46   | 36  | 36  | 42  | 43  | 39   | 40       | 0.96     | 0.743365  | 39       | 0.99     | 0.970790 |          |
| 254569_s_at | Ak4g19320 | hypothetical protein                                | Ubl1 orelease family protein /// hvoothet                         | 12  | 15   | 18  | 15   | 20   | 18  | 15   | 17       | 0.87     | 0.374049 | 16  | 13   | 19   | 15   | 15  | 15  | 18  | 13  | 16   | 15       | 1.04     | 0.696034  | 15       | 1.06     | 0.657948 |          |
| 254570_s_at | Ak4g19330 | putative protein                                    | various predicted prot kelch repeat-containing F-box family pro   | 35  | 30   | 37  | 37   | 42   | 37  | 34   | 39       | 0.87     | 0.136547 | 33  | 30   | 36   | 30   | 25  | 24  | 23  | 27  | 33   | 26       | 1.27     | 0.017052  | 27       | 1.25     | 0.073802 |          |
| 254571_at   | Ak4g19370 | hypothetical protein                                | hypothetical protein                                              | 41  | 53   | 58  | 56   | 61   | 51  | 47   | 53       | 0.81     | 0.528462 | 50  | 61   | 58   | 50   | 47  | 47  | 51  | 48  | 51   | 47       | 1.18     | 0.277748  | 47       | 1.20     | 0.072202 |          |
| 254572_at   | Ak4g19380 | putative protein                                    | predicted protein MTC alcohol oxidase-related                     | 22  | 38   | 20  | 26   | 36   | 16  | 27   | 26       | 1.03     | 0.921772 | 56  | 21   | 26   | 34   | 20  | 37  | 38  | 32  | 34   | 30       | 1.07     | 0.814033  | 30       | 1.13     | 0.754706 |          |
| 254573_at   | Ak4g19420 | putative pectinesterase                             | pectinac pectinesterase family protein                            | 71  | 79   | 129 | 127  | 146  | 122 | 93   | 132      | 0.71     | 0.120020 | 64  | 78   | 73   | 117  | 718 | 90  | 101 | 110 | 71   | 107      | 0.67     | 0.030226  | 108      | 0.66     | 0.020529 |          |
| 254574_at   | Ak4g19430 | expressed protein                                   | expressed protein                                                 | 25  | 44   | 183 | 128  | 138  | 94  | 84   | 120      | 0.70     | 0.522964 | 19  | 22   | 30   | 117  | 72  | 57  | 51  | 50  | 24   | 63       | 0.38     | 0.004403  | 71       | 0.34     | 0.004343 |          |
| 254575_at   | Ak4g19400 | putative protein                                    | various predicted prot glycosyl transferase family 1 protein      | 23  | 45   | 33  | 114  | 85   | 47  | 34   | 82       | 0.41     | 0.187772 | 20  | 20   | 18   | 44   | 36  | 32  | 19  | 44  | 26   | 36       | 0.56     | 0.030186  | 35       | 0.55     | 0.036840 |          |
| 254576_at   | Ak4g19350 | putative protein                                    | - supported by full-length expressed protein                      | 243 | 315  | 298 | 340  | 393  | 314 | 285  | 352      | 0.81     | 0.102795 | 404 | 358  | 356  | 508  | 452 | 411 | 383 | 380 | 373  | 427      | 0.87     | 0.163214  | 457      | 0.82     | 0.059048 |          |
| 254577_at   | Ak4g19450 | putative protein                                    | - supported by full-length nodulin-related                        | 157 | 215  | 227 | 318  | 311  | 259 | 207  | 296      | 0.70     | 0.019565 | 185 | 146  | 205  | 273  | 219 | 207 | 237 | 241 | 179  | 236      | 0.76     | 0.026407  | 253      | 0.77     | 0.108322 |          |
| 254578_at   | Ak4g19410 | putative pectinesterase                             | pectinac pectinesterase, putative                                 | 422 | 647  | 550 | 458  | 628  | 483 | 540  | 523      | 1.03     | 0.852231 | 917 | 1115 | 1004 | 770  | 660 | 640 | 805 | 778 | 1012 | 731      | 1.38     | 0.003719  | 690      | 1.47     | 0.010709 |          |
| 254579_at   | Ak4g19400 | hypothetical protein                                | - supported by full- expressed protein                            | 158 | 246  | 304 | 351  | 233  | 306 | 0.76 | 0.096843 | 302      | 322      | 317 | 470  | 339  | 358  | 444 | 389 | 314 | 400 | 333  | 358      | 0.78     | 0.042213  | 369      | 0.81     | 0.042768 |          |
| 254580_at   | Ak4g19390 | putative protein                                    | - supported by cDNA - expressed protein                           | 121 | 181  | 258 | 235  | 231  | 188 | 187  | 218      | 0.86     | 0.501452 | 149 | 163  | 164  | 221  | 190 | 185 | 258 | 240 | 159  | 219      | 0.72     | 0.019556  | 199      | 0.80     | 0.030218 |          |
| 254581_at   | Ak4g19440 | putative protein                                    | membrane-associated pentatricopeptide (PPR) repeat-containi       | 30  | 40   | 40  | 46   | 46   | 35  | 36   | 42       | 0.86     | 0.287729 | 22  | 26   | 28   | 34   | 32  | 24  | 30  | 27  | 25   | 29       | 0.86     | 0.169628  | 30       | 0.85     | 0.266859 |          |
| 254582_at   | Ak4g19470 | outative protein                                    | TMV resistance protein disease resistance protein-related         | 18  | 23   | 29  | 28   | 25   | 30  | 23   | 28       | 0.85     | 0.305182 | 20  | 22   | 28   | 18   | 20  | 21  | 24  | 20  | 23   | 21       | 1.14     | 0.226665  | 20       | 1.19     | 0.202084 |          |
| 254583_at   | Ak4g19480 | hypothetical protein                                | - supported by full- expressed protein                            | 30  | 46   | 45  | 45   | 42   | 41  | 37   | 42       | 0.88     | 0.332656 | 27  | 21   | 23   | 33   | 28  | 31  | 27  | 31  | 27   | 31       | 0.48     | 0.355014  | 29       | 0.86     | 0.712915 |          |
| 254584_at   | Ak4g19400 | putative protein                                    | probable membrane p- expressed protein                            | 80  | 100  | 109 | 111  | 125  | 93  | 96   | 109      | 0.88     | 0.359386 | 61  | 66   | 68   | 85   | 72  | 65  | 68  | 65  | 65   | 67       | 0.89     | 0.899005  | 65       | 0.90     | 0.866780 |          |
| 254585_at   | Ak4g19500 | resistance protein                                  | - like down mildew disease resistance protein (TIR-NBS-LR         | 26  | 25   | 31  | 33   | 35   | 26  | 27   | 32       | 0.86     | 0.241785 | 16  | 21   | 26   | 23   | 17  | 14  | 18  | 20  | 21   | 18       | 1.12     | 0.452242  | 18       | 1.14     | 0.532574 |          |
| 254586_at   | Ak4g19510 | TMV resistance protein                              | N-like TMV res disease resistance protein (TIR-NBS-LR             | 39  | 67   | 68  | 52   | 55   | 48  | 58   | 52       | 1.12     | 0.540800 | 41  | 60   | 50   | 54   | 38  | 43  | 26  | 55  | 57   | 50       | 0.98     | 0.874388  | 45       | 1.11     | 0.508327 |          |
| 254587_at   | Ak4g19580 | resistance protein                                  | RPP5 - like down n disease resistance family protein // dise      | 24  | 32   | 37  | 38   | 45   | 35  | 31   | 39       | 0.79     | 0.154486 | 15  | 10   | 19   | 20   | 20  | 18  | 28  | 20  | 15   | 21       | 0.68     | 0.060101  | 19       | 0.75     | 0.132590 |          |
| 254593_at   | Ak4g19530 | TMV resistance protein                              | N- like TMV re disease resistance protein (TIR-NBS-LR             | 43  | 45   | 44  | 48   | 44   | 30  | 36   | 42       | 0.81     | 0.410862 | 32  | 30   | 26   | 26   | 28  | 34  | 26  | 32  | 25   | 27       | 1.17     | 0.226668  | 26       | 1.25     | 0.161261 |          |
| 254594_at   | Ak4g19550 | hypothetical protein                                | - expressed protein                                               | 27  | 38   | 47  | 37   | 38   | 34  | 33   | 36       |          |          |     |      |      |      |     |     |     |     |      |          |          |           |          |          |          |          |

|             |           |                                                                                           |      |      |      |      |      |      |      |      |          |          |      |      |      |      |      |      |      |      |      |          |          |          |          |          |          |
|-------------|-----------|-------------------------------------------------------------------------------------------|------|------|------|------|------|------|------|------|----------|----------|------|------|------|------|------|------|------|------|------|----------|----------|----------|----------|----------|----------|
| 254507_at   | At4g20160 | Gluc-rich protein mature-parasite-infected expressed protein                              | 28   | 41   | 39   | 41   | 50   | 40   | 36   | 44   | 0.83     | 0.223350 | 26   | 27   | 30   | 26   | 29   | 27   | 39   | 26   | 27   | 30       | 0.93     | 0.557248 | 27       | 1.00     | 0.965029 |
| 254508_at   | At4g20170 | putative protein gene F409.34 chromo expressed protein                                    | 224  | 230  | 246  | 395  | 363  | 315  | 233  | 358  | 0.65     | 0.006662 | 348  | 319  | 333  | 599  | 472  | 386  | 525  | 506  | 333  | 498      | 0.67     | 0.012669 | 485      | 0.69     | 0.071332 |
| 254509_at   | At4g20200 | terpene cyclase like protein 5-ol-arist terpene synthase/cyclase family protein           | 17   | 20   | 26   | 24   | 24   | 20   | 21   | 22   | 0.93     | 0.612173 | 16   | 26   | 20   | 19   | 18   | 19   | 24   | 20   | 20   | 20       | 1.01     | 0.943542 | 19       | 1.09     | 0.603252 |
| 254510_at   | At4g20210 | terpene synthase like protein (+)-delta-terpene synthase/cyclase family protein           | 11   | 11   | 20   | 20   | 20   | 16   | 18   | 18   | 0.86     | 0.407066 | 14   | 17   | 13   | 15   | 14   | 13   | 15   | 13   | 15   | 13       | 1.01     | 0.908066 | 15       | 1.01     | 0.915899 |
| 254511_at   | At4g20220 | hypothetical protein                                                                      | 14   | 23   | 22   | 19   | 31   | 17   | 20   | 23   | 0.88     | 0.613621 | 16   | 16   | 23   | 16   | 12   | 15   | 15   | 16   | 18   | 15       | 1.24     | 0.107488 | 14       | 1.28     | 0.186242 |
| 254512_at   | At4g20230 | terpene cyclase like protein cyclopropane terpene synthase/cyclase family protein         | 16   | 18   | 23   | 19   | 21   | 22   | 19   | 21   | 0.92     | 0.534303 | 18   | 15   | 31   | 15   | 16   | 12   | 16   | 16   | 21   | 16       | 1.35     | 0.195303 | 15       | 1.38     | 0.314474 |
| 254513_at   | At4g20240 | cyclohexene p450 like protein cyclopropane terpene synthase/cyclase family protein        | 22   | 20   | 26   | 22   | 22   | 21   | 23   | 22   | 1.04     | 0.706582 | 17   | 19   | 21   | 20   | 13   | 14   | 20   | 20   | 13   | 14       | 1.09     | 0.524282 | 16       | 1.21     | 0.259463 |
| 254514_at   | At4g20250 | hypothetical protein                                                                      | 9    | 9    | 5    | 5    | 9    | 8    | 7    | 9    | 0.80     | 0.723656 | 4    | 7    | 5    | 7    | 4    | 12   | 7    | 5    | 7    | 7        | 0.80     | 0.495937 | 7        | 1.01     | 0.454983 |
| 254515_at   | At4g20270 | CLV1 receptor kinase like protein CLA leucine-rich repeat transmembrane prot              | 341  | 447  | 374  | 586  | 677  | 514  | 387  | 592  | 0.65     | 0.022633 | 261  | 195  | 272  | 447  | 362  | 314  | 361  | 347  | 243  | 366      | 0.66     | 0.012117 | 375      | 0.65     | 0.044989 |
| 254516_at   | At4g20290 | putative protein                                                                          | 19   | 19   | 27   | 20   | 23   | 18   | 22   | 20   | 1.07     | 0.647494 | 21   | 23   | 21   | 21   | 13   | 21   | 25   | 23   | 22   | 21       | 1.04     | 0.772148 | 18       | 1.17     | 0.281123 |
| 254517_at   | At4g20310 | putative protein conserved hypothetical peptidase M50, putative UTP / sterol-rec          | 77   | 104  | 109  | 113  | 135  | 104  | 97   | 117  | 0.82     | 0.200129 | 76   | 74   | 86   | 102  | 84   | 81   | 84   | 91   | 78   | 88       | 0.89     | 0.123681 | 89       | 0.88     | 0.219450 |
| 254490_at   | At4g20320 | CTP synthase like protein CTP synthetase CTP synthase, putative / UTP -ammonio            | 352  | 480  | 532  | 810  | 822  | 540  | 454  | 724  | 0.63     | 0.084425 | 301  | 221  | 305  | 594  | 446  | 396  | 376  | 277  | 468  | 0.59     | 0.017254 | 523      | 0.53     | 0.008755 |          |
| 254401_at   | At4g20330 | putative protein hypothetical protein Ara expressed protein                               | 189  | 219  | 209  | 316  | 327  | 256  | 299  | 0.69 | 0.010367 | 142      | 114  | 152  | 155  | 194  | 211  | 198  | 136  | 211  | 0.84 | 0.001377 | 216      | 0.63     | 0.005740 |          |          |
| 254492_at   | At4g20260 | endomembrane-associated protein : s DREPP plasma membrane polypeptide /                   | 124  | 126  | 167  | 112  | 161  | 89   | 139  | 121  | 1.15     | 0.506603 | 159  | 189  | 107  | 185  | 157  | 140  | 240  | 233  | 152  | 191      | 0.79     | 0.259522 | 161      | 0.94     | 0.750746 |
| 254462_at   | At4g20150 | putative protein : supported by full-length leucine-rich repeat transmembrane prot        | 1397 | 1842 | 2044 | 2108 | 2387 | 2152 | 1761 | 2216 | 0.79     | 0.080599 | 1921 | 2044 | 2062 | 2738 | 2391 | 2072 | 2415 | 2274 | 2009 | 2378     | 0.84     | 0.047348 | 2400     | 0.84     | 0.118552 |
| 254463_at   | At4g20280 | putative protein transcription initiation f transcription initiation factor IID (TFIID) f | 238  | 285  | 324  | 322  | 329  | 287  | 282  | 313  | 0.90     | 0.340218 | 285  | 327  | 330  | 462  | 321  | 331  | 327  | 316  | 314  | 351      | 0.89     | 0.371258 | 371      | 0.85     | 0.297329 |
| 254464_at   | At4g20400 | putative protein retinoblastoma binding transcription factor tumor (fmi) family a         | 552  | 684  | 719  | 704  | 968  | 644  | 652  | 802  | 0.81     | 0.230914 | 614  | 352  | 543  | 681  | 714  | 590  | 725  | 689  | 503  | 680      | 0.74     | 0.035249 | 682      | 0.76     | 0.140674 |
| 254465_at   | At4g20420 | taetum-specific A3 like protein Arabid thapsigargin-specific protein-related              | 29   | 31   | 32   | 31   | 35   | 29   | 37   | 32   | 1.17     | 0.505327 | 30   | 27   | 33   | 31   | 26   | 22   | 25   | 26   | 30   | 26       | 1.16     | 0.147577 | 26       | 1.14     | 0.322462 |
| 254466_at   | At4g20430 | subtilisin-like serine protease contains : subtilase family protein                       | 328  | 441  | 342  | 423  | 515  | 363  | 370  | 434  | 0.85     | 0.326711 | 334  | 287  | 318  | 412  | 344  | 315  | 301  | 293  | 313  | 333      | 0.94     | 0.541195 | 357      | 0.88     | 0.242621 |
| 254467_at   | At4g20450 | receptor protein kinase - like protein se leucine-rich repeat protein kinase, putati      | 17   | 24   | 25   | 24   | 23   | 28   | 22   | 25   | 0.89     | 0.373625 | 18   | 13   | 19   | 18   | 16   | 15   | 17   | 18   | 17   | 17       | 0.99     | 0.955312 | 16       | 1.03     | 0.810697 |
| 254468_at   | At4g20460 | UDP-glucose 4-epimerase - like protein NAD-dependent epimerase/dehydratase                | 153  | 201  | 190  | 101  | 83   | 182  | 95   | 152  | 0.05103  | 122      | 114  | 115  | 91   | 77   | 78   | 67   | 62   | 117  | 75   | 1.55     | 0.003876 | 62       | 1.42     | 0.002265 |          |
| 254469_at   | At4g20470 | hypothetical protein                                                                      | 68   | 90   | 92   | 90   | 107  | 92   | 84   | 96   | 0.87     | 0.245432 | 45   | 35   | 48   | 46   | 37   | 49   | 46   | 47   | 43   | 45       | 0.95     | 0.603116 | 44       | 0.97     | 0.820836 |
| 254470_at   | At4g20490 | putative protein other hypothetical prot avosy-like retrotransposon familv /// avos       | 18   | 20   | 19   | 20   | 20   | 24   | 19   | 21   | 0.90     | 0.160559 | 17   | 16   | 24   | 19   | 17   | 23   | 21   | 16   | 19   | 19       | 1.00     | 0.988262 | 20       | 0.98     | 0.803344 |
| 254471_s_at | At4g20500 | putative protein parts of other proteins hypothetical protein /// filament protein-n      | 32   | 35   | 43   | 44   | 48   | 42   | 36   | 45   | 0.81     | 0.097071 | 21   | 21   | 22   | 23   | 20   | 16   | 20   | 17   | 21   | 19       | 1.11     | 0.284611 | 20       | 1.09     | 0.462542 |
| 254472_s_at | At4g20510 | putative protein predicted proteins, Ara expressed protein                                | 20   | 24   | 28   | 34   | 32   | 24   | 34   | 30   | 0.79     | 0.194299 | 15   | 13   | 23   | 20   | 15   | 14   | 19   | 17   | 17   | 17       | 0.97     | 0.829451 | 17       | 1.00     | 0.995594 |
| 254473_s_at | At4g20530 | putative protein kinase like proteins, A receptor-like protein kinase-related /// hv      | 22   | 23   | 22   | 25   | 21   | 22   | 23   | 0.98 | 0.711651 | 21       | 21   | 26   | 27   | 20   | 18   | 21   | 23   | 23   | 22   | 105      | 0.637779 | 22       | 1.05     | 0.730770 |          |
| 254474_at   | At4g20390 | putative protein predicted proteins, Ara integral membrane family protein                 | 41   | 45   | 61   | 62   | 76   | 59   | 49   | 66   | 0.75     | 0.100280 | 29   | 42   | 42   | 39   | 34   | 39   | 52   | 54   | 38   | 44       | 0.86     | 0.360124 | 38       | 1.01     | 0.967479 |
| 254475_at   | At4g20440 | putative sRNP protein small nuclear r small nuclear ribonucleoprotein associat            | 709  | 763  | 753  | 900  | 951  | 775  | 742  | 875  | 0.85     | 0.070817 | 845  | 862  | 844  | 1181 | 865  | 885  | 1058 | 960  | 850  | 990      | 0.86     | 0.124992 | 977      | 0.87     | 0.283683 |
| 254476_at   | At4g20410 | putative protein gamma-SNAP protein, gamma-soluble NSF attachment protein                 | 415  | 545  | 564  | 629  | 720  | 513  | 508  | 621  | 0.82     | 0.212386 | 598  | 650  | 629  | 952  | 732  | 747  | 696  | 637  | 626  | 765      | 0.82     | 0.101695 | 830      | 0.75     | 0.032959 |
| 254477_at   | At4g20380 | zinc-finger protein Lsrl1 supported by zinc finger protein (LSR1)                         | 292  | 363  | 347  | 375  | 327  | 347  | 363  | 0.95 | 0.803326 | 300      | 407  | 345  | 448  | 366  | 327  | 333  | 353  | 345  | 339  | 462      | 0.92     | 0.541771 | 474      | 0.86     | 0.520416 |
| 254478_at   | At4g20330 | putative protein TRANSCRIPTION INI: transcription initiation factor-related               | 203  | 259  | 274  | 312  | 339  | 266  | 245  | 306  | 0.80     | 0.119325 | 278  | 310  | 306  | 489  | 373  | 331  | 329  | 309  | 298  | 366      | 0.81     | 0.172255 | 397      | 0.75     | 0.108693 |
| 254479_at   | At4g20350 | putative protein hypothetical protein - c expressed protein                               | 63   | 63   | 69   | 54   | 61   | 58   | 56   | 58   | 0.97     | 0.828683 | 39   | 53   | 54   | 65   | 48   | 53   | 53   | 56   | 49   | 55       | 0.89     | 0.287387 | 55       | 0.89     | 0.421086 |
| 254480_at   | At4g20360 | translation elongation factor EF-Tu pre elongation factor Tu / EF-Tu (TUFA)               | 1007 | 1313 | 1255 | 1426 | 1429 | 1218 | 1192 | 1358 | 0.88     | 0.280333 | 1333 | 1247 | 1306 | 1562 | 1346 | 1269 | 1571 | 1557 | 1295 | 1481     | 0.89     | 0.105474 | 1392     | 0.93     | 0.346341 |
| 254481_at   | At4g20480 | hypothetical protein - supported by tcd1 expressed protein                                | 44   | 52   | 61   | 44   | 46   | 51   | 46   | 51   | 1.11     | 0.436204 | 56   | 66   | 59   | 45   | 40   | 41   | 47   | 43   | 60   | 45       | 1.39     | 0.005489 | 42       | 1.44     | 0.056894 |
| 254482_at   | At4g20370 | TWIN SISTER OF FT (TSF) terminal fl twin sister of FT protein (TSF) / TFL1 lik            | 44   | 50   | 67   | 55   | 62   | 61   | 54   | 60   | 0.90     | 0.449112 | 36   | 37   | 49   | 44   | 35   | 41   | 43   | 41   | 41   | 41       | 1.00     | 0.995677 | 40       | 1.02     | 0.873359 |
| 254483_at   | At4g20740 | putative protein CRP1. Zea mays. PID centariotic-ecolite (PPR) repeat-contains            | 48   | 79   | 76   | 80   | 79   | 71   | 68   | 77   | 0.88     | 0.440567 | 40   | 44   | 49   | 53   | 44   | 41   | 44   | 41   | 41   | 41       | 0.96     | 0.613897 | 46       | 0.96     | 0.694465 |
| 254484_at   | At4g20750 | hypothetical protein short-chain dehydrogenase/reductase (S                               | 51   | 72   | 82   | 79   | 90   | 77   | 69   | 82   | 0.84     | 0.245758 | 74   | 93   | 89   | 135  | 89   | 96   | 92   | 87   | 86   | 100      | 0.86     | 0.303035 | 107      | 0.80     | 0.240977 |
| 254485_at   | At4g20760 | cell-wall staining protein CSA - like ce short-chain dehydrogenase/reductase (S           | 64   | 94   | 87   | 98   | 69   | 74   | 78   | 90   | 0.90     | 0.504520 | 104  | 107  | 108  | 164  | 118  | 107  | 139  | 122  | 106  | 130      | 0.82     | 0.123673 | 132      | 0.80     | 0.250416 |
| 254486_at   | At4g20770 | putative protein cp1 protein, Zea mays. putative protein (PPR) repeat-contains            | 19   | 18   | 24   | 26   | 29   | 31   | 20   | 29   | 0.71     | 0.023811 | 18   | 24   | 19   | 22   | 20   | 20   | 18   | 21   | 20   | 20       | 1.00     | 0.997686 | 21       | 0.98     | 0.833523 |
| 254487_at   | At4g20780 | calcium-binding protein - like calcium-t calcium-binding protein, putative                | 38   | 45   | 48   | 43   | 45   | 41   | 44   | 43   | 1.01     | 0.864151 | 48   | 46   | 52   | 42   | 50   | 46   | 51   | 50   | 49   | 48       | 1.02     | 0.720045 | 46       | 1.06     | 0.426214 |
| 254488_at   | At4g20790 | putative protein receptor-like protein ki leucine-rich repeat family protein              | 8    | 4    | 3    | 4    | 8    | 4    | 5    | 5    | 0.86     | 0.774708 | 6    | 7    | 4    | 3    | 4    | 6    | 5    | 3    | 6    | 4        | 1.39     | 0.109248 | 4        | 1.35     | 0.256800 |
| 254489_at   | At4g20800 | putative protein berberine broide encrv FAD-binding domain-containing protein             | 33   | 40   | 43   | 11   | 9    | 13   | 47   | 11   | 4.39     | 0.027803 | 108  | 127  | 125  | 13   | 9    | 15   | 7    | 12   | 13   | 11       | 11.25    | 0.000062 | 12       | 9.73     | 0.000062 |
| 254490_at   | At4g20820 | reticulene oxidase - like protein reticulid FAD-binding domain-containing protein         | 21   | 23   | 26   | 30   | 16   | 20   | 23   | 22   | 1.05     | 0.817116 | 18   | 19   | 21   | 14   | 11   | 16   | 16   | 15   | 18   | 11       | 1.28     | 0.045580 | 14       | 1.35     | 0.056576 |
| 254491_at   | At4g20840 | reticulene oxidase - like protein reticulid FAD-binding domain-containing protein         | 35   | 36   | 36   | 29   | 20   | 18   | 36   | 22   | 1.61     | 0.015836 | 47   | 52   | 39   | 45   | 36   | 25   | 51   | 55   | 46   | 42       | 1.08     | 0.666324 | 35       | 1.30     | 0.206018 |
| 254492_at   | At4g20830 | reticulene oxidase - like protein reticulid FAD-binding domain-containing protein         | 608  | 899  | 840  | 136  | 121  | 104  | 202  | 121  | 1.67     | 0.024467 | 187  | 243  | 231  | 140  | 105  | 97   | 122  | 122  | 220  | 117      | 1.88     | 0.000641 | 114      | 1.94     | 0.007742 |
| 254493_at   | At4g20850 | putative protein trioxetridinellid II subtilase family protein                            | 169  | 189  | 200  | 852  | 961  | 673  | 769  | 828  | 0.93     | 0.645543 | 706  | 593  | 620  | 907  | 697  | 643  | 878  | 839  | 639  | 793      | 0.81     | 0.082221 | 749      | 0.85     | 0.277964 |
| 254494_at   | At4g20860 | ethylene-regulated receptor Z (ERT2) ethylene-responsive nuclear protein / etl            | 125  | 157  | 162  | 176  | 192  | 162  | 147  | 176  | 0.85     | 0.807036 | 130  | 143  | 157  | 108  | 132  | 104  | 137  | 143  | 108  | 132      | 1.04     | 0.129276 | 125      | 1.01     | 0.495026 |
| 254495_at   | At4g20900 | putative protein male sterility MS5 / pollenless 3                                        | 21   | 19   | 24   | 24   | 28   | 30   | 22   | 27   | 0.80     | 0.075623 | 21   | 20   | 22   | 20   | 15   | 17   | 22   | 19   | 21   | 18       | 1.14     | 0.162251 | 17       | 1.22     | 0.075322 |
| 254496_at   | At4g20940 | putative protein receptor kinase-like pr leucine-rich repeat family protein               | 2    |      |      |      |      |      |      |      |          |          |      |      |      |      |      |      |      |      |      |          |          |          |          |          |          |

|             |           |                                                                                               |      |      |      |      |      |      |      |      |          |          |      |      |      |      |      |      |      |      |      |      |          |          |      |          |          |
|-------------|-----------|-----------------------------------------------------------------------------------------------|------|------|------|------|------|------|------|------|----------|----------|------|------|------|------|------|------|------|------|------|------|----------|----------|------|----------|----------|
| 254418_at   | At4g21480 | glucose transporter glucose transport / glucose transporter, putative                         | 1844 | 1859 | 2288 | 2508 | 2504 | 2105 | 1997 | 2373 | 0.84     | 0.130107 | 2079 | 1793 | 2284 | 2973 | 2291 | 2014 | 2506 | 2503 | 2052 | 2457 | 0.84     | 0.134270 | 2426 | 0.85     | 0.305781 |
| 254419_at   | At4g21490 | NADH dehydrogenase like protein NAD pyridine nucleotide-disulphide oxidoredu                  | 140  | 190  | 188  | 230  | 265  | 192  | 173  | 229  | 0.75     | 0.102429 | 171  | 144  | 163  | 163  | 181  | 160  | 156  | 157  | 159  | 164  | 0.97     | 0.609599 | 168  | 0.95     | 0.426432 |
| 254420_at   | At4g21500 | hydrophobic protein                                                                           | 276  | 319  | 419  | 52   | 58   |      | 42   | 56   | 0.75     | 0.028797 | 36   | 43   | 49   | 41   | 44   | 36   | 43   | 42   | 43   | 41   | 1.03     | 0.898429 | 40   | 1.05     | 0.661719 |
| 254421_at   | At4g21501 | VP1 like protein transcription activator                                                      | 198  | 260  | 201  | 301  | 369  | 258  | 243  | 306  | 0.79     | 0.301550 | 198  | 189  | 194  | 234  | 225  | 207  | 230  | 230  | 234  | 223  | 0.83     | 0.177171 | 237  | 0.83     | 0.109493 |
| 254422_at   | At4g21560 | putative protein hydrophobic protein Y1 vacuolar protein sortin-sorted-associated prot        | 378  | 317  | 414  | 463  | 492  | 367  | 335  | 441  | 0.76     | 0.130940 | 323  | 349  | 323  | 539  | 370  | 427  | 461  | 438  | 332  | 447  | 0.74     | 0.021478 | 445  | 0.75     | 0.088230 |
| 254423_at   | At4g21610 | Lsd1 like protein zinc-finger protein Ls zinc finger protein, putative                        | 176  | 223  | 238  | 195  | 232  | 196  | 212  | 208  | 1.02     | 0.843852 | 232  | 263  | 236  | 314  | 248  | 241  | 284  | 255  | 244  | 268  | 0.91     | 0.258782 | 268  | 0.91     | 0.405472 |
| 254424_at   | At4g21510 | hydrophobic protein / supported by full-I F-box family protein                                | 81   | 113  | 125  | 141  | 149  | 130  | 106  | 140  | 0.76     | 0.079827 | 123  | 125  | 123  | 187  | 150  | 142  | 144  | 142  | 124  | 153  | 0.81     | 0.044950 | 159  | 0.78     | 0.060366 |
| 254425_at   | At4g21450 | transmembrane-associated protein vesicle-associated membrane family prc                       | 1272 | 1444 | 590  | 563  | 653  | 499  | 515  | 561  | 0.92     | 0.572549 | 517  | 456  | 511  | 653  | 607  | 513  | 594  | 565  | 495  | 586  | 0.84     | 0.036165 | 591  | 0.84     | 0.102506 |
| 254391_at   | At4g21590 | putative bifunctional nuclease bifunctional bifunctional nuclease, putative                   | 1573 | 1784 | 1833 | 2563 | 2717 | 2263 | 1730 | 2515 | 0.69     | 0.007214 | 1837 | 1849 | 2038 | 3091 | 2652 | 2246 | 2451 | 2452 | 1908 | 2578 | 0.74     | 0.014425 | 2663 | 0.72     | 0.040338 |
| 254392_at   | At4g21600 | enduronuclease, putative / supported by bifunctional nuclease, putative                       | 24   | 25   | 30   | 32   | 35   | 33   | 26   | 33   | 0.78     | 0.029246 | 15   | 19   | 18   | 20   | 18   | 16   | 17   | 17   | 17   | 18   | 0.95     | 0.499005 | 19   | 0.89     | 0.185032 |
| 254393_at   | At4g21580 | autolysine NADPH quinone oxidoreductase, zinc-binding dehydrode                               | 233  | 326  | 376  | 475  | 461  | 383  | 312  | 439  | 0.71     | 0.065633 | 356  | 395  | 383  | 618  | 457  | 457  | 371  | 387  | 378  | 457  | 0.83     | 0.222001 | 509  | 0.74     | 0.078695 |
| 254394_at   | At4g21630 | subtilisin-like serine protease contains: subtilase family member III subtilase fami          | 1642 | 2015 | 2135 | 1926 | 1756 | 1518 | 1997 | 1733 | 1.15     | 0.144403 | 1677 | 1507 | 1911 | 2082 | 1926 | 1503 | 1803 | 1676 | 1698 | 1798 | 0.94     | 0.550183 | 1837 | 0.92     | 0.541506 |
| 254395_at   | At4g21640 | subtilisin-like protease subtilisin-like or subtilase family protein                          | 54   | 75   | 63   | 45   | 44   | 48   | 64   | 46   | 1.39     | 0.461444 | 72   | 50   | 77   | 75   | 58   | 54   | 77   | 68   | 66   | 66   | 1.00     | 0.889883 | 82   | 1.06     | 0.736634 |
| 254396_at   | At4g21680 | peptide transporter - like protein peptid protein-dependent oligopeptide transport            | 22   | 27   | 33   | 50   | 31   | 31   | 27   | 37   | 0.73     | 0.248304 | 17   | 23   | 22   | 22   | 19   | 31   | 27   | 21   | 24   | 0.85 | 0.311181 | 21       | 0.99 | 0.914244 |          |
| 254397_at   | At4g21690 | gibberellin 3 beta-hydroxylase - like pcr gibberellin 3 beta-hydroxylase family prc           | 19   | 24   | 24   | 24   | 29   | 24   | 22   | 26   | 0.87     | 0.249313 | 20   | 21   | 19   | 15   | 15   | 18   | 19   | 15   | 20   | 16   | 1.23     | 0.015131 | 16   | 1.25     | 0.020861 |
| 254367_at   | At4g21700 | hydrophobic protein                                                                           | 119  | 141  | 174  | 173  | 187  | 187  | 145  | 182  | 0.79     | 0.095433 | 75   | 68   | 86   | 93   | 69   | 72   | 80   | 83   | 76   | 79   | 0.96     | 0.856443 | 78   | 0.98     | 0.867952 |
| 254368_at   | At4g21710 | DNA-directed RNA polymerase EC 2.2.1 DNA-directed RNA polymerase II 135 kI                    | 544  | 590  | 563  | 653  | 499  | 515  | 561  | 0.92 | 0.572549 | 517      | 456  | 511  | 653  | 607  | 513  | 594  | 565  | 495  | 586  | 0.84 | 0.036165 | 591      | 0.84 | 0.102506 |          |
| 254369_at   | At4g21720 | putative protein                                                                              | 62   | 84   | 89   | 76   | 89   | 78   | 74   | 79   | 0.99     | 0.955636 | 55   | 67   | 62   | 77   | 56   | 61   | 74   | 56   | 61   | 65   | 0.95     | 0.609832 | 65   | 0.94     | 0.610811 |
| 254370_at   | At4g21750 | L1 specific homeobox gene ATML1/ovl L1 specific homeobox gene (ML1) / ovl                     | 1395 | 1668 | 1752 | 1763 | 2014 | 1424 | 1605 | 1733 | 0.93     | 0.560470 | 1239 | 1031 | 1203 | 1537 | 1376 | 1136 | 1386 | 1320 | 1158 | 1351 | 0.86     | 0.096868 | 1350 | 0.86     | 0.223076 |
| 254371_at   | At4g21760 | putative protein predicted proteins, Arg glycine-rich protein                                 | 25   | 25   | 31   | 32   | 32   | 31   | 33   | 29   | 0.91     | 0.225311 | 21   | 21   | 29   | 23   | 27   | 22   | 23   | 24   | 22   | 22   | 1.11     | 0.368231 | 21   | 1.15     | 0.401338 |
| 254372_at   | At4g21620 | putative protein predicted proteins, Arg glycine-rich protein                                 | 966  | 1137 | 1338 | 1505 | 1599 | 1533 | 1153 | 1546 | 0.75     | 0.020593 | 1670 | 1622 | 1679 | 2419 | 2070 | 1862 | 2269 | 2297 | 1656 | 2117 | 0.76     | 0.077057 | 2117 | 0.78     | 0.004797 |
| 254373_at   | At4g21730 | hydrophobic protein / supported by full-I expressed protein                                   | 18   | 25   | 21   | 21   | 22   | 23   | 21   | 22   | 0.98     | 0.184447 | 23   | 36   | 30   | 25   | 22   | 23   | 22   | 28   | 30   | 24   | 1.24     | 0.117802 | 24   | 1.27     | 0.185135 |
| 254374_at   | At4g21780 | hydrophobic protein / supported by full-I expressed protein                                   | 42   | 58   | 65   | 72   | 69   | 66   | 55   | 69   | 0.80     | 0.123437 | 38   | 44   | 42   | 50   | 37   | 37   | 42   | 49   | 51   | 41   | 0.92     | 0.473127 | 41   | 1.00     | 0.978027 |
| 254375_at   | At4g21800 | putative protein (fragment) ATP/GTP- ATP-binding family protein                               | 367  | 434  | 493  | 586  | 587  | 501  | 431  | 558  | 0.77     | 0.052229 | 423  | 384  | 448  | 712  | 507  | 476  | 522  | 496  | 418  | 543  | 0.77     | 0.079694 | 565  | 0.74     | 0.127014 |
| 254376_at   | At4g21790 | subtilisin-like serine protease contains: subtilase family member I (TOM1)                    | 144  | 166  | 162  | 192  | 162  | 144  | 166  | 162  | 0.77     | 0.052229 | 423  | 384  | 448  | 712  | 507  | 476  | 522  | 496  | 418  | 543  | 0.77     | 0.079694 | 565  | 0.74     | 0.127014 |
| 254377_at   | At4g21650 | putative protein predicted proteins, Arg glycine-rich protein                                 | 120  | 164  | 131  | 214  | 191  | 171  | 138  | 192  | 0.72     | 0.040253 | 118  | 99   | 139  | 235  | 171  | 144  | 188  | 202  | 119  | 188  | 0.63     | 0.019432 | 183  | 0.65     | 0.091781 |
| 254378_at   | At4g21810 | putative protein NADH oxidoreductase Dert-like family protein / degradation in:               | 322  | 570  | 547  | 389  | 460  | 298  | 479  | 383  | 1.25     | 0.351839 | 403  | 455  | 375  | 497  | 397  | 396  | 443  | 436  | 411  | 434  | 0.95     | 0.481133 | 430  | 0.96     | 0.670217 |
| 254379_at   | At4g21820 | putative protein calmodulin-binding protein calmodulin-binding family protein                 | 63   | 80   | 70   | 93   | 98   | 76   | 71   | 89   | 0.80     | 0.100158 | 47   | 45   | 57   | 65   | 58   | 46   | 47   | 49   | 50   | 53   | 0.94     | 0.582033 | 56   | 0.88     | 0.372839 |
| 254380_at   | At4g21865 | putative protein                                                                              | 18   | 18   | 25   | 28   | 32   | 30   | 20   | 30   | 0.65     | 0.023642 | 23   | 26   | 26   | 48   | 42   | 34   | 35   | 29   | 25   | 38   | 0.67     | 0.027678 | 41   | 0.61     | 0.017010 |
| 254381_at   | At4g21880 | putative protein membrane-associated centrin-like protein (PPR) repeat-containi               | 43   | 62   | 40   | 56   | 51   | 42   | 54   | 57   | 0.82     | 0.081730 | 36   | 45   | 46   | 54   | 47   | 51   | 51   | 53   | 55   | 53   | 1.02     | 0.496799 | 53   | 1.03     | 0.526867 |
| 254382_at   | At4g21900 | hydrophobic protein                                                                           | 59   | 83   | 90   | 108  | 111  | 90   | 78   | 103  | 0.75     | 0.092239 | 51   | 51   | 66   | 72   | 54   | 57   | 71   | 65   | 56   | 64   | 0.88     | 0.256860 | 61   | 0.92     | 0.562455 |
| 254383_at   | At4g21950 | hydrophobic protein                                                                           | 14   | 15   | 13   | 16   | 20   | 13   | 14   | 16   | 0.87     | 0.337060 | 15   | 14   | 18   | 18   | 11   | 14   | 14   | 19   | 16   | 15   | 1.03     | 0.831505 | 14   | 1.10     | 0.578457 |
| 254384_at   | At4g21870 | heat shock protein - like heat shock on 26.5 kDa class P-related heat shock pro               | 84   | 90   | 84   | 91   | 102  | 86   | 86   | 93   | 0.93     | 0.252617 | 71   | 62   | 85   | 94   | 95   | 81   | 73   | 74   | 72   | 83   | 0.87     | 0.217219 | 90   | 0.81     | 0.090887 |
| 254385_s_at | At4g21830 | putative protein CG1-131 protein, Ham methionine sulfoxide reductase domain-                  | 48   | 51   | 58   | 55   | 64   | 57   | 52   | 59   | 0.89     | 0.194070 | 54   | 66   | 54   | 57   | 51   | 51   | 53   | 55   | 55   | 53   | 1.02     | 0.496799 | 53   | 1.03     | 0.526867 |
| 254386_at   | At4g21960 | peroxidase orx1 - supported by full-I peroxidase 42 (PER42) (P42) (PRXR1)                     | 1907 | 2444 | 2517 | 3492 | 3916 | 3172 | 2289 | 3527 | 0.65     | 0.012785 | 4114 | 4318 | 3912 | 5456 | 5241 | 4733 | 5201 | 4988 | 4115 | 5124 | 0.80     | 0.001571 | 5144 | 0.80     | 0.013598 |
| 254387_at   | At4g21850 | putative protein CG1-131 protein, Ham methionine sulfoxide reductase domain-                  | 206  | 146  | 169  | 149  | 227  | 128  | 174  | 168  | 1.03     | 0.882399 | 96   | 109  | 99   | 55   | 57   | 60   | 60   | 62   | 101  | 59   | 1.72     | 0.000200 | 57   | 1.77     | 0.000566 |
| 254388_at   | At4g21860 | Expressed protein / supported by full-I methionine sulfoxide reductase domain-                | 227  | 317  | 303  | 386  | 400  | 342  | 282  | 376  | 0.75     | 0.047611 | 340  | 364  | 379  | 514  | 428  | 393  | 405  | 384  | 361  | 425  | 0.85     | 0.096486 | 445  | 0.81     | 0.090298 |
| 254389_s_at | At4g21810 | putative protein expressed protein                                                            | 1112 | 1448 | 1426 | 1854 | 2374 | 1880 | 1315 | 2536 | 0.65     | 0.021466 | 1805 | 1653 | 1841 | 1326 | 1500 | 1304 | 1626 | 1520 | 1388 | 1650 | 0.93     | 0.002522 | 1287 | 0.91     | 0.059412 |
| 254390_at   | At4g21940 | calcium-dependent protein kinase - like calcium-dependent protein kinase, putat               | 26   | 32   | 38   | 40   | 32   | 36   | 32   | 36   | 0.89     | 0.393239 | 18   | 18   | 20   | 30   | 29   | 26   | 21   | 21   | 19   | 26   | 0.72     | 0.032685 | 29   | 0.65     | 0.001766 |
| 254363_at   | At4g22010 | putative protein hydrophobic protein di-F-box family protein                                  | 354  | 337  | 275  | 384  | 391  | 304  | 322  | 360  | 0.89     | 0.360917 | 216  | 258  | 277  | 273  | 216  | 193  | 302  | 272  | 251  | 251  | 1.00     | 0.984151 | 227  | 1.10     | 0.476018 |
| 254364_at   | At4g22020 | olvine-rich protein olvine-rich cell wa pseudogene, hydrophobic protein                       | 52   | 67   | 78   | 78   | 85   | 77   | 66   | 80   | 0.83     | 0.157593 | 29   | 33   | 39   | 43   | 30   | 28   | 38   | 34   | 33   | 35   | 0.96     | 0.776599 | 34   | 0.99     | 0.934813 |
| 254365_at   | At4g22030 | putative protein hydrophobic protein                                                          | 31   | 21   | 35   | 36   | 29   | 37   | 30   | 34   | 0.88     | 0.467853 | 19   | 24   | 24   | 24   | 26   | 16   | 22   | 21   | 16   | 22   | 1.06     | 0.684848 | 21   | 1.05     | 0.688672 |
| 254366_s_at | At4g22040 | LTR retrotransposon like protein retrov copia-like retrotransposon family                     | 30   | 692  | 745  | 34   | 39   | 39   | 681  | 37   | 18.30    | 0.000096 | 752  | 705  | 685  | 72   | 64   | 81   | 65   | 54   | 714  | 67   | 10.62    | 0.000000 | 72   | 8.88     | 0.000006 |
| 254367_at   | At4g22060 | putative protein hydrophobic protein di-F-box family protein                                  | 42   | 58   | 65   | 52   | 63   | 60   | 55   | 58   | 0.94     | 0.657072 | 42   | 46   | 53   | 40   | 38   | 39   | 42   | 42   | 42   | 47   | 1.16     | 0.053008 | 39   | 1.20     | 0.082990 |
| 254368_s_at | At4g22080 | octadecanoyl l-lysine octadecanoyl l-lysine octadecanoyl l-lysine                             | 12   | 14   | 12   | 11   | 14   | 9    | 13   | 11   | 1.16     | 0.326803 | 8    | 11   | 23   | 8    | 10   | 12   | 10   | 8    | 14   | 10   | 1.45     | 0.258815 | 10   | 1.37     | 0.466708 |
| 254333_at   | At4g22100 | glucuronidase like protein glucuronidase-like glucuronidase family 1 protein                  | 33   | 34   | 40   | 38   | 41   | 38   | 47   | 56   | 0.66     | 0.012577 | 37   | 35   | 28   | 35   | 24   | 26   | 31   | 24   | 28   | 31   | 0.77     | 0.051431 | 28   | 1.17     | 0.555616 |
| 254340_at   | At4g22120 | putative protein hydrophobic protein H <sup>+</sup> early-responsive to dehydration protein-i | 213  | 238  | 268  | 272  | 285  | 231  | 240  | 263  | 0.91     | 0.370297 | 198  | 195  | 235  | 257  | 233  | 188  | 240  | 211  | 209  | 226  | 0.93     | 0.403492 | 226  | 0.93     | 0.520992 |
| 254341_at   | At4g22130 | serine/threonine protein kinase like pcr protein kinase family protein                        | 174  | 193  | 224  | 223  | 208  |      |      |      |          |          |      |      |      |      |      |      |      |      |      |      |          |          |      |          |          |

|             |          |                                                                                               |      |      |      |      |      |      |      |      |      |          |      |      |      |      |      |      |      |      |      |      |          |           |          |          |          |          |
|-------------|----------|-----------------------------------------------------------------------------------------------|------|------|------|------|------|------|------|------|------|----------|------|------|------|------|------|------|------|------|------|------|----------|-----------|----------|----------|----------|----------|
| 254331_s_at | A4g12710 | cytochrome P450 - like protein flavono cytochrome P450 family protein                         | 26   | 25   | 36   | 35   | 33   | 33   | 29   | 34   | 0.86 | 0.292062 | 24   | 26   | 25   | 27   | 24   | 21   | 30   | 29   | 25   | 26   | 0.96     | 0.645814  | 24       | 1.05     | 0.522693 |          |
| 254332_at   | A4g12710 | leucine rich repeat receptor kinase-like leucine-rich repeat transmembrane prot               | 128  | 164  | 136  | 148  | 172  | 127  | 143  | 149  | 0.96 | 0.737901 | 53   | 54   | 69   | 76   | 71   | 59   | 60   | 61   | 59   | 66   | 0.89     | 0.281361  | 69       | 0.85     | 0.234587 |          |
| 254333_at   | A4g12753 | predicted protein predicted protein ER1 steroid desaturase family protein                     | 40   | 58   | 43   | 67   | 65   | 53   | 47   | 62   | 0.77 | 0.109444 | 40   | 41   | 37   | 38   | 30   | 35   | 40   | 42   | 39   | 37   | 1.06     | 0.457669  | 34       | 1.15     | 0.121826 |          |
| 254334_at   | A4g12760 | predicted protein predicted protein PPR1 repeat containi                                      | 30   | 49   | 42   | 40   | 43   | 38   | 44   | 38   | 0.41 | 0.301808 | 38   | 41   | 37   | 38   | 36   | 31   | 31   | 37   | 41   | 38   | 0.97     | 0.750753  | 38       | 0.99     | 0.136132 |          |
| 254340_at   | A4g12780 | Translation factor EF-1 alpha - like pro ACT domain-containing protein (ACR7)                 | 164  | 202  | 232  | 233  | 251  | 200  | 199  | 228  | 0.88 | 0.311387 | 175  | 171  | 146  | 182  | 133  | 136  | 191  | 190  | 164  | 166  | 0.99     | 0.917343  | 150      | 1.09     | 0.489119 |          |
| 254301_at   | A4g12790 | predicted protein predicted protein, Arat MATE efflux family protein                          | 24   | 31   | 36   | 35   | 38   | 30   | 36   | 38   | 0.85 | 0.238853 | 26   | 28   | 33   | 36   | 30   | 28   | 30   | 27   | 29   | 30   | 0.96     | 0.672223  | 31       | 0.93     | 0.517034 |          |
| 254302_at   | A4g12800 | hypothetical protein                                                                          | 10   | 12   | 17   | 16   | 12   | 17   | 13   | 13   | 0.86 | 0.439745 | 11   | 9    | 14   | 10   | 9    | 14   | 13   | 12   | 11   | 11   | 1.00     | 0.991895  | 11       | 1.05     | 0.812451 |          |
| 254303_at   | A4g12830 | expressed protein                                                                             | 46   | 69   | 61   | 69   | 74   | 65   | 69   | 74   | 0.85 | 0.358108 | 67   | 68   | 67   | 85   | 67   | 62   | 71   | 67   | 65   | 71   | 0.81     | 0.050657  | 74       | 0.81     | 0.136109 |          |
| 254272_at   | A4g12850 | predicted protein hvothetical protein - expressed protein                                     | 132  | 169  | 201  | 217  | 233  | 183  | 167  | 211  | 0.79 | 0.155813 | 130  | 135  | 171  | 203  | 162  | 155  | 152  | 146  | 145  | 164  | 0.89     | 0.315551  | 173      | 0.84     | 0.237983 |          |
| 254273_at   | A4g12720 | olivoconerin endoexocase - like orotid glycolipase M22 family protein                         | 212  | 256  | 282  | 307  | 350  | 281  | 250  | 313  | 0.80 | 0.093616 | 231  | 234  | 259  | 367  | 274  | 270  | 291  | 290  | 241  | 298  | 0.81     | 0.059137  | 303      | 0.80     | 0.133058 |          |
| 254274_at   | A4g12770 | outative DNA bindino protein DNA-bin: DNA-binding family protein                              | 158  | 225  | 262  | 278  | 310  | 250  | 228  | 279  | 0.82 | 0.119708 | 152  | 161  | 169  | 262  | 199  | 177  | 194  | 182  | 161  | 203  | 0.79     | 0.087536  | 213      | 0.76     | 0.113855 |          |
| 254302_at   | A4g12800 | HSP associated protein like p48. Human tetraaricoxide repeat (TFR)-containin                  | 2218 | 2588 | 2908 | 2857 | 3569 | 2856 | 2571 | 3094 | 0.83 | 0.167422 | 2415 | 2306 | 2468 | 3050 | 2445 | 2422 | 3063 | 2863 | 2396 | 2848 | 0.84     | 0.029052  | 272      | 0.86     | 0.120396 |          |
| 254275_at   | A4g12920 | predicted protein PVP3 protein. Phase zinc finger (AN)-like family protein                    | 382  | 408  | 459  | 495  | 445  | 380  | 416  | 440  | 0.95 | 0.046066 | 505  | 520  | 494  | 699  | 579  | 469  | 609  | 507  | 590  | 609  | 0.86     | 0.143873  | 592      | 0.87     | 0.320531 |          |
| 254277_at   | A4g12680 | myb-like protein myb-related transcript myb family transcription factor (MYB85)               | 9    | 13   | 11   | 13   | 17   | 15   | 11   | 15   | 0.73 | 0.056731 | 13   | 7    | 12   | 14   | 11   | 12   | 12   | 9    | 11   | 11   | 0.95     | 0.748188  | 12       | 0.90     | 0.597559 |          |
| 254278_at   | A4g12740 | Expressed protein : supported by full-length glycone-rich protein                             | 393  | 516  | 481  | 600  | 714  | 522  | 463  | 612  | 0.76 | 0.088713 | 546  | 644  | 626  | 906  | 718  | 667  | 698  | 681  | 606  | 734  | 0.82     | 0.085281  | 704      | 0.79     | 0.114562 |          |
| 254279_at   | A4g12750 | Expressed protein : supported by full-le zinc finger (DHCYC type) family protein              | 357  | 466  | 541  | 529  | 628  | 462  | 455  | 540  | 0.84 | 0.303638 | 525  | 643  | 561  | 811  | 707  | 644  | 597  | 580  | 576  | 668  | 0.86     | 0.188230  | 721      | 0.80     | 0.073710 |          |
| 254280_at   | A4g12756 | Expressed protein : supported by full-le steroid desaturase family protein                    | 119  | 157  | 181  | 244  | 247  | 188  | 152  | 226  | 0.67 | 0.048963 | 172  | 191  | 197  | 281  | 214  | 221  | 197  | 207  | 224  | 224  | 0.83     | 0.141498  | 241      | 0.78     | 0.091027 |          |
| 254281_at   | A4g12840 | predicted protein leal sodium-desende bio acid-sodium symvorter family protein                | 72   | 77   | 95   | 92   | 90   | 88   | 81   | 90   | 0.50 | 0.284637 | 88   | 92   | 110  | 121  | 86   | 88   | 98   | 96   | 97   | 98   | 0.99     | 0.901903  | 98       | 0.98     | 0.902203 |          |
| 254282_at   | A4g12860 | hypothetical protein                                                                          | 99   | 131  | 117  | 123  | 141  | 101  | 116  | 121  | 0.95 | 0.715031 | 65   | 62   | 74   | 83   | 83   | 62   | 79   | 77   | 67   | 78   | 0.87     | 0.157668  | 76       | 0.88     | 0.336574 |          |
| 254283_s_at | A4g12870 | anthocyanidin synthase - like protein p. leucoanthocyanidin dioxygenase, putath               | 45   | 76   | 122  | 91   | 81   | 82   | 81   | 85   | 0.96 | 0.880918 | 423  | 363  | 462  | 228  | 168  | 166  | 189  | 166  | 146  | 183  | 0.77     | 0.001018  | 187      | 2.22     | 0.002903 |          |
| 254284_at   | A4g12910 | putative fatty-related protein fatty-relat WD-40 repeat family protein                        | 39   | 40   | 45   | 49   | 63   | 43   | 41   | 52   | 0.80 | 0.155676 | 35   | 36   | 39   | 45   | 41   | 35   | 36   | 32   | 37   | 38   | 0.97     | 0.738115  | 40       | 0.91     | 0.337870 |          |
| 254285_at   | A4g12940 | outative cdc2 kinase homolog cdc2 kin protein kinase family protein                           | 13   | 19   | 30   | 21   | 25   | 22   | 21   | 23   | 0.92 | 0.734325 | 10   | 13   | 16   | 15   | 14   | 14   | 15   | 12   | 13   | 14   | 0.95     | 0.639012  | 14       | 0.93     | 0.582373 |          |
| 254286_at   | A4g12950 | outative MAD5 Box / AGL. orlein MAC MAD5-box protein (AGL19)                                  | 11   | 13   | 19   | 17   | 17   | 18   | 14   | 17   | 0.84 | 0.288750 | 10   | 14   | 20   | 9    | 14   | 14   | 14   | 14   | 14   | 13   | 1.09     | 0.635038  | 12       | 1.16     | 0.583983 |          |
| 254287_at   | A4g12960 | outative protein similarity to hvothetical hvothetical protein                                | 66   | 83   | 98   | 95   | 102  | 86   | 82   | 94   | 0.87 | 0.322307 | 61   | 57   | 66   | 70   | 62   | 62   | 64   | 60   | 61   | 64   | 0.96     | 0.406404  | 65       | 0.95     | 0.395721 |          |
| 254288_at   | A4g12970 | putative protein Human mRNA for KIA, peptidase C50 family protein                             | 107  | 125  | 109  | 136  | 166  | 118  | 114  | 140  | 0.81 | 0.119335 | 103  | 86   | 117  | 133  | 124  | 96   | 106  | 107  | 102  | 113  | 0.90     | 0.344330  | 118      | 0.87     | 0.335895 |          |
| 254289_at   | A4g12980 | putative protein predicted protein, Arat expressed protein                                    | 30   | 29   | 36   | 44   | 46   | 39   | 32   | 43   | 0.74 | 0.020004 | 15   | 25   | 31   | 24   | 23   | 30   | 23   | 18   | 20   | 26   | 0.70     | 0.064410  | 26       | 0.70     | 0.143614 |          |
| 254290_at   | A4g13000 | hypothetical protein                                                                          | 35   | 46   | 53   | 56   | 61   | 57   | 45   | 58   | 0.77 | 0.065593 | 33   | 35   | 41   | 41   | 39   | 36   | 39   | 40   | 36   | 39   | 0.94     | 0.297754  | 39       | 0.94     | 0.484586 |          |
| 254291_at   | A4g13010 | outative protein UDP-galactose transo UDP-galactose transporter-related                       | 658  | 873  | 931  | 524  | 435  | 244  | 821  | 401  | 2.05 | 0.023154 | 521  | 581  | 623  | 408  | 264  | 256  | 294  | 267  | 575  | 298  | 1.93     | 0.000691  | 309      | 1.86     | 0.009841 |          |
| 254292_at   | A4g13030 | putative protein                                                                              | 103  | 129  | 168  | 172  | 173  | 154  | 133  | 167  | 0.80 | 0.166968 | 81   | 55   | 92   | 99   | 90   | 78   | 95   | 85   | 79   | 90   | 0.89     | 0.230924  | 89       | 0.89     | 0.386481 |          |
| 254293_at   | A4g13040 | outative protein SF16 protein. Helianth calmodulin-binding family protein                     | 329  | 408  | 477  | 568  | 428  | 329  | 408  | 477  | 0.78 | 0.075608 | 396  | 423  | 477  | 463  | 394  | 423  | 477  | 463  | 394  | 423  | 0.96     | 0.608352  | 454      | 0.91     | 0.553470 |          |
| 254294_at   | A4g13070 | putative membrane protein membrane membrane                                                   | 97   | 71   | 112  | 83   | 92   | 73   | 93   | 83   | 1.13 | 0.466776 | 108  | 127  | 101  | 150  | 101  | 133  | 132  | 125  | 112  | 124  | 0.90     | 0.376432  | 121      | 0.92     | 0.612539 |          |
| 254295_at   | A4g13080 | putative protein predicted protein, Arat expressed protein                                    | 24   | 11   | 19   | 16   | 16   | 16   | 19   | 13   | 0.80 | 0.289709 | 11   | 12   | 15   | 14   | 11   | 12   | 15   | 12   | 13   | 13   | 1.01     | 0.934731  | 12       | 1.04     | 0.743048 |          |
| 254296_at   | A4g13090 | hypothetical protein                                                                          | 21   | 26   | 28   | 26   | 28   | 29   | 26   | 28   | 0.93 | 0.244655 | 18   | 18   | 21   | 20   | 18   | 18   | 21   | 17   | 19   | 19   | 1.02     | 0.764377  | 19       | 1.03     | 0.616375 |          |
| 254297_at   | A4g13110 | hypothetical protein                                                                          | 8    | 7    | 8    | 7    | 8    | 6    | 7    | 8    | 0.70 | 0.087719 | 3    | 4    | 7    | 4    | 7    | 3    | 4    | 5    | 5    | 1.07 | 0.808706 | 5         | 0.99     | 0.987084 |          |          |
| 254298_at   | A4g12890 | outative orlein : supported by full-len expressed protein                                     | 972  | 972  | 974  | 1010 | 1127 | 869  | 858  | 1002 | 0.86 | 0.352393 | 835  | 949  | 944  | 1289 | 1101 | 1006 | 1104 | 1052 | 909  | 1110 | 0.82     | 0.027793  | 1132     | 0.80     | 0.070542 |          |
| 254299_at   | A4g12920 | hvothetical protein : supported by full- expressed protein                                    | 76   | 103  | 138  | 188  | 131  | 96   | 106  | 138  | 0.76 | 0.066774 | 109  | 103  | 118  | 165  | 139  | 133  | 147  | 148  | 110  | 147  | 0.75     | 0.003487  | 146      | 0.75     | 0.028565 |          |
| 254265_s_at | A4g12310 | serine threonine kinase - like protein K receptor-like protein kinase 5 (RLK5) ///            | 8    | 11   | 11   | 9    | 13   | 12   | 10   | 11   | 0.87 | 0.360947 | 9    | 11   | 15   | 9    | 10   | 8    | 8    | 12   | 8    | 14   | 0.88     | 0.081846  | 8        | 1.50     | 0.197077 |          |
| 254266_at   | A4g12310 | serine threonine kinase - like protein serine threonine receptor-like protein kinase 5 (RLK5) | 31   | 45   | 46   | 44   | 46   | 44   | 41   | 45   | 0.91 | 0.460556 | 34   | 37   | 44   | 41   | 32   | 34   | 38   | 44   | 38   | 43   | 1.01     | 0.924727  | 36       | 0.91     | 0.509643 |          |
| 254267_at   | A4g12930 | dhivdroorutase - supported by cDNA : receptor-like, mitochondrial / DHQase                    | 140  | 180  | 161  | 182  | 207  | 158  | 160  | 182  | 0.88 | 0.291134 | 171  | 181  | 172  | 240  | 207  | 178  | 196  | 194  | 174  | 203  | 0.86     | 0.087996  | 208      | 0.84     | 0.130777 |          |
| 254268_at   | A4g13040 | outative protein FAF1. Mus musculus. UBX domain-containing protein                            | 87   | 107  | 109  | 109  | 125  | 96   | 101  | 110  | 0.92 | 0.455108 | 112  | 100  | 93   | 147  | 118  | 107  | 126  | 125  | 101  | 125  | 0.81     | 0.051390  | 124      | 0.82     | 0.156018 |          |
| 254269_at   | A4g13050 | outative serine/threonine kinase MAP3 protein kinase, putative                                | 72   | 90   | 112  | 99   | 104  | 86   | 91   | 96   | 0.95 | 0.705236 | 66   | 60   | 70   | 85   | 83   | 67   | 86   | 77   | 65   | 80   | 0.82     | 0.030588  | 78       | 0.83     | 0.109238 |          |
| 254270_at   | A4g13010 | oamm-olatum/vosine synthetase : olatumate-cysteine liase / oamm-dult                          | 931  | 1151 | 1249 | 1415 | 1511 | 1168 | 1120 | 1375 | 0.81 | 0.128882 | 868  | 735  | 912  | 1162 | 1037 | 805  | 963  | 940  | 838  | 985  | 0.85     | 0.142570  | 1002     | 0.84     | 0.236733 |          |
| 254271_at   | A4g13150 | serine/threonine kinase - like protein K protein kinase family protein                        | 22   | 18   | 22   | 20   | 19   | 22   | 20   | 22   | 0.89 | 0.311821 | 13   | 18   | 12   | 14   | 12   | 14   | 12   | 19   | 14   | 12   | 0.97     | 0.870198  | 12       | 1.12     | 0.373680 |          |
| 254241_at   | A4g12910 | serine/threonine kinase - like protein sr protein kinase family protein                       | 22   | 48   | 66   | 69   | 59   | 69   | 49   | 61   | 0.59 | 0.103    | 84   | 73   | 77   | 53   | 77   | 53   | 67   | 51   | 51   | 75   | 0.48     | 0.157     | 0.000459 | 46       | 1.64     | 0.003680 |
| 254242_at   | A4g13200 | serine/threonine kinase - like protein sr protein kinase family protein                       | 24   | 34   | 36   | 29   | 36   | 32   | 31   | 33   | 0.96 | 0.782318 | 37   | 37   | 29   | 41   | 25   | 28   | 38   | 29   | 32   | 32   | 0.99     | 0.932490  | 31       | 1.02     | 0.926059 |          |
| 254243_at   | A4g13210 | serine/threonine kinase - like protein sr protein kinase family protein                       | 19   | 21   | 26   | 25   | 21   | 21   | 22   | 23   | 0.98 | 0.855011 | 17   | 20   | 22   | 20   | 14   | 16   | 16   | 18   | 20   | 17   | 1.16     | 0.168392  | 17       | 1.17     | 0.287092 |          |
| 254244_at   | A4g13230 | outative protein S-receptor kinase 8 or protein kinase family protein                         | 15   | 15   | 16   | 15   | 17   | 15   | 17   | 15   | 0.88 | 0.161230 | 11   | 16   | 15   | 17   | 10   | 15   | 16   | 18   | 15   | 17   | 0.88     | 0.1421985 | 16       | 0.81     | 0.250340 |          |
| 254245_at   | A4g13240 | serine/threonine kinase - like protein sr protein kinase family protein                       | 40   | 55   | 63   | 60   | 64   | 62   | 52   | 62   | 0.84 | 0.222115 | 75   | 68   | 74   | 74   | 50   | 56   | 73   | 75   | 73   | 66   | 1.11     | 0.358677  | 60       | 1.21     | 0.174645 |          |
| 254246_at   | A4g13250 | protein kinase - like protein receptor kj protein kinase family protein                       | 59   | 59   | 62   | 65   | 73   | 61   | 60   | 66   | 0.91 | 0.164349 | 51   |      |      |      |      |      |      |      |      |      |          |           |          |          |          |          |

|           |          |                                                                                    |     |      |      |      |      |      |      |      |          |          |      |      |     |      |      |     |      |      |      |      |          |          |      |          |          |
|-----------|----------|------------------------------------------------------------------------------------|-----|------|------|------|------|------|------|------|----------|----------|------|------|-----|------|------|-----|------|------|------|------|----------|----------|------|----------|----------|
| 254236_at | A4g23840 | putative protein VSG expression site-a leucine-rich repeat family protein          | 204 | 251  | 294  | 272  | 287  | 233  | 250  | 264  | 0.95     | 0.662809 | 168  | 157  | 164 | 218  | 179  | 171 | 222  | 217  | 163  | 202  | 0.81     | 0.038160 | 190  | 0.86     | 0.146381 |
| 254177_at | A4g23860 | putative protein gene T2C21.1, Caeno PDH finger protein-related                    | 159 | 199  | 188  | 221  | 248  | 187  | 180  | 219  | 0.82     | 0.160030 | 129  | 130  | 135 | 201  | 158  | 145 | 183  | 161  | 131  | 170  | 0.77     | 0.027059 | 168  | 0.78     | 0.094303 |
| 254178_at | A4g23880 | hypothetical protein                                                               | 18  | 23   | 24   | 26   | 24   | 20   | 21   | 23   | 0.92     | 0.504186 | 11   | 14   | 14  | 14   | 16   | 15  | 13   | 12   | 13   | 14   | 0.93     | 0.363671 | 15   | 0.87     | 0.104227 |
| 254179_at | A4g23910 | putative protein various predicted prot expressed protein                          | 154 | 192  | 199  | 230  | 170  | 180  | 200  | 194  | 0.92     | 0.403504 | 213  | 196  | 211 | 236  | 227  | 212 | 211  | 222  | 212  | 211  | 0.91     | 0.154098 | 230  | 0.88     | 0.174800 |
| 254180_at | A4g23930 | putative protein hnn1 protein homolog, expressed protein                           | 106 | 113  | 141  | 153  | 156  | 132  | 120  | 147  | 0.82     | 0.107167 | 124  | 134  | 155 | 166  | 154  | 142 | 156  | 140  | 138  | 153  | 0.90     | 0.126013 | 154  | 0.90     | 0.237577 |
| 254181_at | A4g23940 | FliH protease, putative contains similia FliH protease, putative                   | 199 | 245  | 207  | 288  | 313  | 225  | 217  | 275  | 0.79     | 0.121611 | 184  | 170  | 214 | 268  | 219  | 167 | 240  | 222  | 189  | 223  | 0.85     | 0.206813 | 218  | 0.87     | 0.419061 |
| 254182_at | A4g23950 | putative protein various predicted prot expressed protein                          | 123 | 145  | 152  | 169  | 181  | 150  | 140  | 167  | 0.84     | 0.098787 | 91   | 85   | 109 | 125  | 100  | 111 | 112  | 109  | 95   | 109  | 0.87     | 0.129194 | 109  | 0.88     | 0.284872 |
| 254183_at | A4g23960 | putative protein predicted protein, Arab 30-kDa protein                            | 27  | 30   | 40   | 29   | 27   | 31   | 20   | 32   | 0.90     | 0.085804 | 26   | 25   | 36  | 28   | 27   | 25  | 23   | 25   | 23   | 27   | 1.16     | 0.042265 | 24   | 0.83     | 0.167233 |
| 254184_at | A4g23970 | hypothetical protein                                                               | 24  | 22   | 24   | 27   | 27   | 25   | 23   | 26   | 0.88     | 0.046585 | 20   | 24   | 22  | 21   | 26   | 20  | 24   | 24   | 22   | 23   | 0.95     | 0.515389 | 22   | 0.98     | 0.840209 |
| 254185_at | A4g23990 | cellulose synthase catalytic subunit - II cellulose synthase family protein        | 39  | 50   | 65   | 62   | 57   | 54   | 52   | 58   | 0.89     | 0.470029 | 33   | 42   | 37  | 41   | 31   | 35  | 40   | 42   | 37   | 38   | 0.99     | 0.905338 | 36   | 1.05     | 0.700429 |
| 254186_at | A4g24010 | putative protein cellulose synthase cati cellulose synthase family protein         | 42  | 38   | 50   | 56   | 65   | 55   | 43   | 59   | 0.74     | 0.035739 | 32   | 29   | 35  | 38   | 29   | 33  | 49   | 38   | 32   | 37   | 0.85     | 0.289994 | 33   | 0.96     | 0.686071 |
| 254187_at | A4g23880 | putative protein hypothetical protein, S expressed protein                         | 69  | 141  | 128  | 130  | 125  | 93   | 112  | 116  | 0.97     | 0.089883 | 113  | 142  | 124 | 194  | 148  | 173 | 163  | 126  | 164  | 177  | 0.67     | 0.033714 | 161  | 0.78     | 0.125803 |
| 254188_at | A4g24020 | UDP-glucose 4-epimerase - like protein UDP-glucose 4-epimerase, putative / UIC     | 78  | 88   | 129  | 92   | 105  | 77   | 99   | 88   | 1.12     | 0.597886 | 96   | 111  | 79  | 105  | 86   | 84  | 95   | 93   | 95   | 93   | 1.03     | 0.774408 | 92   | 1.04     | 0.778188 |
| 254189_at | A4g24000 | putative protein cellulose synthase cati cellulose synthase family protein         | 43  | 70   | 60   | 104  | 116  | 86   | 58   | 102  | 0.57     | 0.018969 | 28   | 32   | 35  | 56   | 40   | 50  | 54   | 54   | 32   | 51   | 0.63     | 0.003831 | 48   | 0.66     | 0.031247 |
| 254190_at | A4g23885 | Expressed protein ; supported by full-length expressed protein                     | 342 | 370  | 384  | 365  | 364  | 366  | 365  | 382  | 0.96     | 0.475157 | 402  | 393  | 448 | 532  | 435  | 410 | 339  | 337  | 415  | 410  | 1.01     | 0.933979 | 459  | 0.90     | 0.342570 |
| 254191_at | A4g23900 | hypothetical protein ; supported by full- nucleoside diphosphate kinase 4 (NDK4    | 382 | 421  | 530  | 473  | 454  | 412  | 444  | 446  | 0.99     | 0.964777 | 438  | 455  | 471 | 486  | 402  | 445 | 448  | 455  | 438  | 1.04 | 0.461148 | 432      | 1.05 | 0.468088 |          |
| 254192_at | A4g23850 | acvl-CoA synthetase - like protein acvl lono-chain-fatty-acid-CoA liasee / lono-i  | 73  | 746  | 786  | 941  | 945  | 812  | 755  | 899  | 0.84     | 0.035908 | 646  | 470  | 605 | 714  | 661  | 533 | 630  | 610  | 574  | 630  | 0.91     | 0.352876 | 636  | 0.90     | 0.456565 |
| 254193_at | A4g23870 | putative protein crectid proteins, Arab expressed protein                          | 28  | 72   | 47   | 50   | 52   | 33   | 49   | 45   | 1.09     | 0.796654 | 20   | 24   | 18  | 19   | 15   | 23  | 25   | 22   | 21   | 21   | 0.99     | 0.956505 | 19   | 1.10     | 0.578949 |
| 254194_at | A4g23980 | auxin response factor 9 (ARF9) ; supu auxin-responsive factor (ARF9)               | 120 | 174  | 155  | 153  | 160  | 123  | 150  | 145  | 1.03     | 0.826457 | 90   | 84   | 107 | 101  | 86   | 81  | 86   | 92   | 94   | 89   | 1.05     | 0.505489 | 89   | 1.05     | 0.636805 |
| 254195_at | A4g24020 | putative protein various predicted prot RWRP-RK domain-containing protein          | 81  | 79   | 69   | 61   | 80   | 51   | 70   | 64   | 1.09     | 0.061847 | 59   | 56   | 60  | 49   | 51   | 50  | 49   | 56   | 58   | 51   | 1.15     | 0.077454 | 50   | 1.16     | 0.003396 |
| 254196_at | A4g24030 | putative protein                                                                   | 34  | 32   | 47   | 38   | 39   | 38   | 37   | 38   | 0.96     | 0.861546 | 22   | 22   | 24  | 27   | 26   | 22  | 21   | 22   | 23   | 26   | 0.89     | 0.282650 | 25   | 0.91     | 0.294815 |
| 254197_at | A4g24040 | trehalase - like protein trehalase 1 GM olivocci hydrolase family protein 37 / tre | 585 | 966  | 1144 | 763  | 892  | 594  | 898  | 750  | 1.20     | 0.468876 | 1056 | 1090 | 982 | 1251 | 1166 | 973 | 1423 | 1295 | 1043 | 1221 | 0.85     | 0.131503 | 1130 | 0.92     | 0.380141 |
| 254198_at | A4g24090 | hypothetical protein                                                               | 91  | 136  | 124  | 131  | 147  | 113  | 117  | 131  | 0.90     | 0.460785 | 120  | 128  | 137 | 158  | 129  | 134 | 133  | 125  | 128  | 136  | 0.95     | 0.413106 | 140  | 0.91     | 0.299707 |
| 254199_at | A4g24100 | putative protein Site-20 related kinase : protein kinase family protein            | 41  | 57   | 60   | 64   | 59   | 48   | 53   | 57   | 0.92     | 0.579715 | 34   | 42   | 41  | 51   | 43   | 39  | 43   | 40   | 39   | 43   | 0.90     | 0.248046 | 44   | 0.87     | 0.269670 |
| 254200_at | A4g24110 | putative protein predicted proteins, Arab expressed protein                        | 229 | 280  | 242  | 302  | 282  | 248  | 217  | 277  | 0.78     | 0.089518 | 187  | 219  | 210 | 260  | 199  | 182 | 235  | 231  | 205  | 221  | 0.93     | 0.443425 | 214  | 0.96     | 0.763394 |
| 254201_at | A4g24130 | putative protein predicted proteins - expressed protein                            | 287 | 301  | 406  | 424  | 377  | 383  | 331  | 395  | 0.84     | 0.191209 | 645  | 680  | 700 | 750  | 545  | 492 | 539  | 543  | 675  | 574  | 1.18     | 0.150521 | 506  | 1.13     | 0.379931 |
| 254202_at | A4g24140 | putative protein hydroxymuconic semii hydroxamate, alpha/beta fold family protein  | 24  | 25   | 33   | 29   | 32   | 30   | 27   | 31   | 0.89     | 0.321992 | 16   | 24   | 24  | 25   | 21   | 21  | 22   | 24   | 21   | 23   | 0.95     | 0.629922 | 22   | 0.96     | 0.768489 |
| 254203_at | A4g24150 | putative protein various predicted prot expressed protein                          | 467 | 467  | 541  | 419  | 419  | 355  | 492  | 398  | 1.24     | 0.044477 | 452  | 438  | 438 | 491  | 415  | 382 | 538  | 505  | 443  | 466  | 0.95     | 0.583979 | 429  | 1.03     | 0.700812 |
| 254204_at | A4g24160 | putative protein CGI-58 protein - Homc hydroxamate, alpha/beta fold family protein | 259 | 268  | 306  | 398  | 456  | 327  | 278  | 394  | 0.71     | 0.043540 | 293  | 276  | 252 | 354  | 279  | 265 | 389  | 390  | 274  | 335  | 0.82     | 0.144443 | 299  | 0.91     | 0.443090 |
| 254205_at | A4g24170 | putative protein kineasin heavy chain - S kineasin heavy chain family protein      | 40  | 40   | 49   | 51   | 49   | 45   | 50   | 45   | 0.87     | 0.194055 | 32   | 53   | 51  | 45   | 45   | 37  | 45   | 45   | 45   | 45   | 0.93     | 0.928987 | 45   | 0.93     | 0.185447 |
| 254206_at | A4g24180 | thumatin-like protein thumatin-like p1 pathogenesis-related thumatin family p      | 30  | 48   | 61   | 57   | 72   | 52   | 46   | 60   | 0.76     | 0.251871 | 24   | 25   | 29  | 33   | 28   | 25  | 28   | 30   | 26   | 29   | 0.89     | 0.192349 | 29   | 0.90     | 0.366474 |
| 254207_at | A4g24060 | putative protein Dof zinc finger protein Dof-type zinc finger domain-containing c  | 168 | 246  | 280  | 370  | 392  | 300  | 232  | 354  | 0.65     | 0.046930 | 324  | 304  | 358 | 538  | 439  | 435 | 432  | 468  | 329  | 462  | 0.71     | 0.003882 | 471  | 0.70     | 0.018891 |
| 254208_at | A4g24175 | Expressed protein ; supported by full-length expressed protein                     | 55  | 73   | 80   | 78   | 93   | 74   | 70   | 82   | 0.85     | 0.254830 | 73   | 66   | 75  | 91   | 71   | 66  | 79   | 66   | 72   | 75   | 0.96     | 0.085113 | 76   | 0.94     | 0.623030 |
| 254174_at | A4g24270 | putative protein various predicted prot expressed protein, putative                | 432 | 432  | 477  | 340  | 383  | 298  | 423  | 324  | 1.30     | 0.071392 | 433  | 383  | 477 | 427  | 345  | 309 | 433  | 414  | 431  | 386  | 1.12     | 0.288343 | 396  | 1.20     | 0.195447 |
| 254175_at | A4g24050 | putative protein CGI-82 protein - Homc short-chain dehydrogenase/reductase (c      | 126 | 220  | 197  | 157  | 190  | 130  | 181  | 159  | 1.14     | 0.545836 | 151  | 166  | 140 | 262  | 183  | 203 | 232  | 196  | 152  | 215  | 0.71     | 0.019450 | 216  | 0.71     | 0.064131 |
| 254176_at | A4g24200 | hypothetical protein hypothetical protein short-expressed protein                  | 87  | 88   | 110  | 106  | 124  | 103  | 98   | 111  | 0.89     | 0.254866 | 63   | 53   | 69  | 73   | 69   | 52  | 71   | 68   | 62   | 67   | 0.93     | 0.447484 | 65   | 0.96     | 0.730943 |
| 254146_at | A4g24260 | endo-1,4-beta-glucanase like protein e endo-1,4-beta-glucanase, putative / cells   | 122 | 131  | 171  | 174  | 197  | 168  | 201  | 142  | 0.88     | 0.072940 | 183  | 164  | 222 | 266  | 218  | 156 | 203  | 207  | 190  | 209  | 0.91     | 0.504602 | 211  | 0.90     | 0.588239 |
| 254147_at | A4g24270 | putative protein similarity Human mRN expressed protein (FRM4)-containing          | 244 | 278  | 289  | 328  | 371  | 258  | 277  | 319  | 0.85     | 0.244655 | 178  | 134  | 208 | 256  | 230  | 190 | 226  | 219  | 226  | 219  | 0.77     | 0.050116 | 226  | 0.77     | 0.145688 |
| 254148_at | A4g24280 | hsp 70-like protein heat shock 70 prote heat shock protein 70, putative / HSP70    | 887 | 1207 | 1112 | 1216 | 1404 | 1121 | 1069 | 1277 | 0.84     | 0.228463 | 1071 | 794  | 964 | 1109 | 1037 | 865 | 1174 | 1202 | 943  | 1077 | 0.88     | 0.226424 | 1004 | 0.94     | 0.606476 |
| 254149_at | A4g24300 | putative protein hypothetical protein                                              | 34  | 36   | 41   | 41   | 44   | 33   | 37   | 39   | 0.95     | 0.632397 | 29   | 37   | 42  | 32   | 29   | 33  | 37   | 34   | 36   | 33   | 1.10     | 0.346929 | 31   | 1.16     | 0.267700 |
| 254150_at | A4g24350 | putative protein shrooate protein - Pcou phosphorylase family protein              | 16  | 18   | 24   | 23   | 25   | 22   | 20   | 23   | 0.84     | 0.190996 | 18   | 16   | 21  | 20   | 19   | 13  | 20   | 20   | 19   | 18   | 1.01     | 0.948866 | 17   | 1.07     | 0.663911 |
| 254151_at | A4g24380 | F-box protein family AIFBX14 similar F-box family protein (FBX14)                  | 162 | 242  | 267  | 297  | 333  | 248  | 224  | 293  | 0.76     | 0.157682 | 123  | 107  | 148 | 208  | 161  | 141 | 157  | 159  | 126  | 165  | 0.77     | 0.086790 | 170  | 0.74     | 0.132350 |
| 254152_at | A4g24410 | hypothetical protein                                                               | 5   | 7    | 9    | 9    | 10   | 9    | 9    | 0.68 | 0.027120 | 5        | 10   | 7    | 8   | 11   | 5    | 7   | 8    | 11   | 5    | 7    | 0.88     | 0.553801 | 8    | 0.87     | 0.665444 |
| 254153_at | A4g24450 | putative protein HSPB1X family R- starch excess protein-related                    | 35  | 45   | 62   | 67   | 69   | 62   | 48   | 66   | 0.72     | 0.088797 | 44   | 43   | 44  | 71   | 60   | 55  | 61   | 67   | 44   | 63   | 0.69     | 0.002424 | 62   | 0.70     | 0.019100 |
| 254154_at | A4g24460 | hypothetical protein                                                               | 99  | 121  | 143  | 139  | 147  | 130  | 121  | 138  | 0.87     | 0.263928 | 88   | 80   | 109 | 100  | 94   | 91  | 104  | 102  | 93   | 98   | 0.94     | 0.437038 | 95   | 0.97     | 0.773934 |
| 254155_at | A4g24480 | putative protein kinase putative protein serine/threonine protein kinase, putative | 46  | 62   | 77   | 53   | 63   | 53   | 61   | 56   | 1.09     | 0.631369 | 46   | 47   | 54  | 40   | 46   | 41  | 48   | 44   | 49   | 44   | 1.12     | 0.091719 | 42   | 1.16     | 0.085154 |
| 254156_at | A4g24490 | Rub carboxylase/transferase like or carboxylase/transferase alpha subunit          | 105 | 127  | 136  | 149  | 160  | 149  | 123  | 153  | 0.80     | 0.036822 | 101  | 110  | 120 | 146  | 128  | 110 | 127  | 160  | 199  | 127  | 0.80     | 0.029207 | 161  | 0.86     | 0.253430 |
| 254157_at | A4g24220 | putative protein protein induced unu + expressed protein                           | 242 | 246  | 384  | 474  | 489  | 369  | 339  | 444  | 0.76     | 0.090170 | 354  | 427  | 372 | 563  | 410  | 408 | 457  | 453  |      |      |          |          |      |          |          |

|             |           |                                                                                          |      |      |      |      |      |      |      |      |          |          |      |      |      |      |      |      |      |      |      |      |          |          |          |          |          |          |
|-------------|-----------|------------------------------------------------------------------------------------------|------|------|------|------|------|------|------|------|----------|----------|------|------|------|------|------|------|------|------|------|------|----------|----------|----------|----------|----------|----------|
| 254114_at   | At4g24980 | putative protein (fragment) MN21 qen: nodulin MN21 family protein                        | 41   | 38   | 76   | 73   | 83   | 79   | 52   | 79   | 0.66     | 0.02696  | 31   | 34   | 41   | 39   | 32   | 28   | 33   | 41   | 36   | 35   | 1.02     | 0.841400 | 33       | 1.07     | 0.590826 |          |
| 254083_at   | At4g24920 | PROTEIN TRANSPORT PROTEIN SE protein transport protein SEC61 gamma                       | 1267 | 1470 | 1431 | 1406 | 1550 | 1236 | 1390 | 1397 | 0.99     | 0.947547 | 1229 | 1357 | 1488 | 1680 | 1394 | 1292 | 1157 | 1231 | 1358 | 1351 | 1.01     | 0.959790 | 1455     | 0.93     | 0.519664 |          |
| 254084_at   | At4g24940 | ubiquitin activating enzyme - like prote SUMO activating enzyme 1a (SAE1a)               | 427  | 522  | 535  | 691  | 751  | 599  | 495  | 680  | 0.73     | 0.020900 | 514  | 528  | 534  | 896  | 688  | 648  | 588  | 625  | 688  | 688  | 0.76     | 0.087266 | 743      | 0.71     | 0.048449 |          |
| 254085_at   | At4g24960 | aliphatic amino acid decarboxylase - like protein abta ABA-responsive protein (HVA22b)   | 623  | 710  | 815  | 1352 | 1692 | 1031 | 713  | 1403 | 0.51     | 0.001472 | 698  | 721  | 824  | 1493 | 1152 | 1098 | 1102 | 1488 | 1132 | 1097 | 0.77     | 0.374881 | 1248     | 0.75     | 0.046381 |          |
| 254086_at   | At4g24920 | putative activator regulatory subunit S6S proteasome regulatory subunit, out             | 758  | 939  | 909  | 1028 | 1107 | 873  | 869  | 1003 | 0.87     | 0.206196 | 640  | 649  | 689  | 980  | 828  | 726  | 852  | 789  | 659  | 835  | 0.79     | 0.021802 | 845      | 0.78     | 0.096939 |          |
| 254087_at   | At4g24840 | brefeldin A-sensitive Golgi protein - like expressed protein                             | 288  | 375  | 364  | 379  | 431  | 360  | 342  | 390  | 0.88     | 0.230867 | 267  | 257  | 286  | 322  | 269  | 244  | 291  | 270  | 270  | 270  | 0.97     | 0.640568 | 278      | 0.97     | 0.760294 |          |
| 254088_at   | At4g24880 | putative protein snurportin1 m3G-cap-i expressed protein                                 | 110  | 152  | 158  | 165  | 194  | 130  | 140  | 166  | 0.84     | 0.309375 | 145  | 159  | 151  | 210  | 180  | 154  | 173  | 158  | 152  | 175  | 0.87     | 0.135519 | 181      | 0.84     | 0.150488 |          |
| 254089_at   | At4g24880 | putative protein actosin gene M3.1 M3A3 domain-containing protein                        | 815  | 815  | 1.03 | 77   | 853  | 585  | 725  | 1.03 | 0.855018 | 603      | 543  | 596  | 603  | 543  | 596  | 603  | 543  | 596  | 603  | 543  | 0.81     | 0.218903 | 571      | 0.80     | 0.603811 |          |
| 254090_at   | At4g25010 | MN3 - like protein MN3 induced duri nodulin MN3 family protein                           | 40   | 52   | 63   | 61   | 59   | 54   | 52   | 58   | 0.89     | 0.414000 | 26   | 36   | 35   | 38   | 35   | 36   | 42   | 38   | 32   | 38   | 0.85     | 0.076361 | 37       | 0.88     | 0.225117 |          |
| 254091_at   | At4g25060 | hypothetical protein                                                                     | 42   | 50   | 63   | 54   | 57   | 47   | 52   | 53   | 0.98     | 0.893872 | 34   | 44   | 45   | 49   | 35   | 39   | 46   | 49   | 41   | 43   | 0.95     | 0.675505 | 40       | 1.02     | 0.919036 |          |
| 254092_at   | At4g25090 | resoratorin burst oxidase - like protein resoratorin burst oxidase, putative / NAC       | 44   | 42   | 63   | 60   | 54   | 48   | 50   | 44   | 0.92     | 0.586782 | 26   | 28   | 35   | 32   | 29   | 25   | 37   | 30   | 30   | 31   | 0.98     | 0.855484 | 29       | 1.05     | 0.730011 |          |
| 254093_at   | At4g25110 | putative protein extensin, Catharanthus alkaloid-abundant family protein (AMC2) / c      | 68   | 78   | 81   | 86   | 36   | 32   | 31   | 28   | 0.33     | 0.000077 | 24   | 21   | 24   | 21   | 24   | 21   | 20   | 34   | 19   | 23   | 0.98     | 0.892839 | 22       | 1.05     | 0.616057 |          |
| 254094_at   | At4g25120 | putative protein other Arabidopsis dependent DNA 1-LvDREP helicase family protein        | 68   | 78   | 81   | 86   | 36   | 32   | 31   | 28   | 0.33     | 0.000077 | 24   | 21   | 24   | 21   | 24   | 21   | 20   | 34   | 19   | 23   | 0.98     | 0.892839 | 22       | 1.05     | 0.616057 |          |
| 254095_at   | At4g25140 | oleosin, 18.5K                                                                           | 17   | 22   | 38   | 498  | 28   | 28   | 185  | 0.14 | 0.367884 | 24       | 16   | 28   | 21   | 23   | 24   | 20   | 21   | 23   | 22   | 1.03 | 0.809503 | 23       | 0.99     | 0.960536 |          |          |
| 254096_at   | At4g25150 | acid phosphatase - like protein acid pH acid phosphatase, putative                       | 56   | 85   | 81   | 98   | 107  | 79   | 74   | 95   | 0.78     | 0.175041 | 50   | 50   | 54   | 87   | 70   | 67   | 60   | 64   | 51   | 69   | 0.74     | 0.026995 | 75       | 0.69     | 0.020674 |          |
| 254097_at   | At4g25160 | putative Ser/Thr protein kinase kinase (protein kinase family protein)                   | 22   | 26   | 43   | 40   | 37   | 30   | 30   | 36   | 0.85     | 0.482194 | 25   | 28   | 33   | 48   | 30   | 28   | 35   | 34   | 29   | 35   | 0.82     | 0.257246 | 35       | 0.81     | 0.385998 |          |
| 254098_at   | At4g25190 | superoxide dismutase (EC 1.15.1.1) (F: superoxide dismutase (Fe)) chloroplast /          | 559  | 543  | 962  | 225  | 373  | 342  | 688  | 313  | 2.20     | 0.060518 | 67   | 98   | 65   | 13   | 15   | 15   | 15   | 12   | 76   | 14   | 5.55     | 0.000220 | 14       | 5.47     | 0.004511 |          |
| 254099_at   | At4g25200 | protein-methionine S-oxide reductase                                                     | 293  | 367  | 412  | 580  | 569  | 473  | 357  | 541  | 0.66     | 0.019258 | 479  | 546  | 570  | 823  | 597  | 540  | 577  | 552  | 532  | 618  | 0.86     | 0.280164 | 654      | 0.81     | 0.250671 |          |
| 254100_at   | At4g25020 | hypothetical protein - supported by full-: KOW domain-containing protein / D111/         | 186  | 221  | 276  | 289  | 307  | 243  | 228  | 280  | 0.81     | 0.184333 | 188  | 196  | 216  | 321  | 263  | 239  | 260  | 245  | 200  | 266  | 0.75     | 0.018425 | 275      | 0.73     | 0.044605 |          |
| 254101_at   | At4g25000 | alpha-amylase - like protein alpha-ami alpha-amylase, putative / 1.4-alpha-D-ol          | 105  | 160  | 198  | 177  | 234  | 192  | 154  | 201  | 0.77     | 0.214774 | 98   | 91   | 82   | 142  | 108  | 112  | 147  | 136  | 90   | 129  | 0.70     | 0.013401 | 121      | 0.75     | 0.060969 |          |
| 254102_at   | At4g25050 | acyl carrier - like protein acyl carrier pr acyl carrier family protein / ACP family p   | 524  | 836  | 710  | 598  | 617  | 497  | 690  | 568  | 1.22     | 0.298901 | 634  | 859  | 755  | 940  | 632  | 671  | 718  | 712  | 749  | 735  | 1.02     | 0.870784 | 748      | 1.00     | 0.969892 |          |
| 254103_at   | At4g25030 | putative protein - supported by full-length expressed protein                            | 311  | 436  | 453  | 414  | 499  | 368  | 400  | 427  | 0.94     | 0.675171 | 389  | 415  | 397  | 580  | 471  | 456  | 423  | 408  | 400  | 468  | 0.86     | 0.149831 | 502      | 0.80     | 0.062260 |          |
| 254104_at   | At4g25040 | putative protein predicted protein. Arat: extensin membrane family protein               | 25   | 29   | 42   | 38   | 45   | 41   | 32   | 41   | 0.76     | 0.150473 | 26   | 29   | 29   | 34   | 29   | 26   | 39   | 30   | 28   | 32   | 0.90     | 0.314190 | 30       | 0.95     | 0.577058 |          |
| 254105_at   | At4g25080 | magnesium-oxotetrohydrovitrin IX methyltr: magnesium-oxotetrohydrovitrin C-methyltr      | 401  | 775  | 669  | 536  | 644  | 406  | 615  | 529  | 1.16     | 0.545112 | 670  | 815  | 679  | 885  | 673  | 738  | 743  | 719  | 721  | 752  | 0.96     | 0.619545 | 766      | 0.94     | 0.601734 |          |
| 254106_at   | At4g24990 | ceramyltransferase-related protein ATPG4 - su ubiquitin family protein                   | 304  | 304  | 334  | 360  | 335  | 290  | 279  | 328  | 0.85     | 0.341444 | 346  | 356  | 350  | 500  | 400  | 368  | 381  | 357  | 350  | 401  | 0.87     | 0.190476 | 423      | 0.83     | 0.144679 |          |
| 254107_at   | At4g25220 | putative protein putative glycerol-3-phosphate transporter, putative                     | 38   | 39   | 53   | 43   | 47   | 45   | 43   | 45   | 0.95     | 0.697559 | 33   | 40   | 48   | 42   | 40   | 38   | 39   | 40   | 39   | 1.02 | 0.819130 | 40       | 1.02     | 0.899904 |          |          |
| 254108_at   | At4g25230 | putative protein                                                                         | 196  | 189  | 240  | 266  | 204  | 175  | 236  | 0.74 | 0.070707 | 153      | 146  | 159  | 209  | 186  | 154  | 154  | 150  | 153  | 170  | 0.90 | 0.302788 | 183      | 0.83     | 0.139890 |          |          |
| 254109_at   | At4g25240 | Pollen-specific protein precursor like P multi-cooxer oxidase type I family protein      | 235  | 284  | 242  | 250  | 292  | 204  | 253  | 249  | 1.02     | 0.876982 | 191  | 141  | 208  | 188  | 143  | 144  | 145  | 142  | 180  | 160  | 1.12     | 0.362178 | 172      | 1.05     | 0.743678 |          |
| 254110_at   | At4g25260 | putative protein cysteine-esterase - Citrus invertase/olecin methyltransferase inhibitor | 44   | 41   | 45   | 51   | 51   | 50   | 43   | 51   | 0.86     | 0.005938 | 57   | 53   | 58   | 75   | 59   | 59   | 74   | 64   | 56   | 66   | 0.84     | 0.070535 | 65       | 0.86     | 0.197058 |          |
| 254101_at   | At4g25240 | putative protein other Arabidopsis dependent protein (PPR) / repeat-containi             | 44   | 41   | 45   | 51   | 51   | 50   | 43   | 51   | 0.86     | 0.005938 | 57   | 53   | 58   | 75   | 59   | 59   | 74   | 64   | 56   | 66   | 0.84     | 0.070535 | 65       | 0.86     | 0.197058 |          |
| 254052_at   | At4g25280 | UMP/CMP kinase like protein UMP/CMP, adenylylase kinase family protein                   | 109  | 138  | 134  | 246  | 263  | 219  | 127  | 249  | 0.51     | 0.004111 | 159  | 166  | 188  | 312  | 259  | 224  | 221  | 206  | 171  | 244  | 0.70     | 0.030986 | 265      | 0.64     | 0.025845 |          |
| 254053_s_at | At4g25300 | SRG1-like protein strong homology to : oxoreductase, ZOG-Fe(II) oxynasease I             | 23   | 21   | 30   | 30   | 26   | 27   | 25   | 28   | 0.89     | 0.364664 | 25   | 25   | 30   | 32   | 27   | 23   | 33   | 32   | 27   | 30   | 0.91     | 0.354796 | 28       | 0.97     | 0.785624 |          |
| 254054_at   | At4g25320 | putative protein DNA-binding protein P DNA-binding protein-related                       | 253  | 275  | 279  | 360  | 358  | 263  | 269  | 333  | 0.81     | 0.072484 | 245  | 241  | 272  | 422  | 316  | 278  | 331  | 318  | 253  | 333  | 0.76     | 0.049725 | 339      | 0.75     | 0.122821 |          |
| 254055_at   | At4g25330 | hypothetical protein                                                                     | 24   | 31   | 35   | 22   | 32   | 24   | 30   | 27   | 1.10     | 0.057017 | 37   | 42   | 36   | 19   | 19   | 21   | 16   | 11   | 14   | 19   | 1.26     | 0.057526 | 50       | 0.43     | 0.004276 |          |
| 254056_at   | At4g25250 | putative protein Group I Pectinesterase invertase/olecin methyltransferase inhibitor     | 13   | 18   | 19   | 20   | 21   | 18   | 17   | 20   | 0.85     | 0.233541 | 13   | 18   | 18   | 17   | 13   | 17   | 20   | 14   | 16   | 16   | 1.01     | 0.066686 | 15       | 1.05     | 0.741751 |          |
| 254057_at   | At4g25170 | putative protein : suported by full-length expressed protein                             | 156  | 332  | 334  | 156  | 130  | 52   | 274  | 113  | 2.43     | 0.074074 | 140  | 200  | 103  | 128  | 99   | 129  | 214  | 191  | 148  | 152  | 0.97     | 0.905341 | 119      | 1.24     | 0.388085 |          |
| 254058_at   | At4g25210 | putative protein cytochrome II - human, PD: expressed protein                            | 652  | 722  | 820  | 951  | 965  | 837  | 731  | 918  | 0.80     | 0.042426 | 627  | 648  | 648  | 703  | 1046 | 769  | 723  | 902  | 890  | 659  | 0.86     | 0.76     | 0.036782 | 846      | 0.78     | 0.145130 |
| 254059_at   | At4g25220 | Arabidopsis mitochondrion-localized an 23-kDa mitochondrial small heat sho               | 46   | 65   | 67   | 88   | 174  | 99   | 119  | 0.50 | 0.003837 | 41       | 45   | 50   | 61   | 45   | 43   | 45   | 42   | 49   | 45   | 43   | 0.55     | 0.057526 | 50       | 0.43     | 0.004276 |          |
| 254060_at   | At4g25350 | putative protein polytopic murine leuko EKS family protein / ERD1XPR1/SYG1               | 12   | 17   | 23   | 21   | 28   | 24   | 18   | 24   | 0.73     | 0.151121 | 13   | 12   | 19   | 14   | 17   | 16   | 21   | 13   | 15   | 16   | 0.90     | 0.512094 | 16       | 0.94     | 0.672563 |          |
| 254061_at   | At4g25360 | putative protein several hypothetical on expressed protein                               | 175  | 223  | 211  | 255  | 302  | 204  | 203  | 254  | 0.80     | 0.184668 | 150  | 126  | 163  | 223  | 213  | 166  | 166  | 164  | 146  | 186  | 0.78     | 0.081769 | 201      | 0.73     | 0.057446 |          |
| 254062_at   | At4g25380 | putative protein zinc finger protein ZNF zinc finger (AN1-like) family protein           | 71   | 92   | 100  | 94   | 93   | 86   | 88   | 81   | 0.96     | 0.718062 | 84   | 84   | 89   | 87   | 69   | 78   | 82   | 81   | 86   | 79   | 1.08     | 0.170297 | 78       | 1.10     | 0.210372 |          |
| 254063_at   | At4g25390 | receptor kinase-like protein receptor-IR protein kinase family protein                   | 48   | 48   | 48   | 48   | 47   | 47   | 53   | 47   | 1.14     | 0.208781 | 39   | 34   | 42   | 34   | 30   | 25   | 33   | 31   | 38   | 31   | 1.25     | 0.031547 | 29       | 1.30     | 0.065689 |          |
| 254064_at   | At4g25410 | putative protein hypothetical protein - J basic helix-loop-helix (bHLH) family prot      | 11   | 18   | 14   | 15   | 14   | 14   | 14   | 14   | 0.96     | 0.803116 | 9    | 9    | 15   | 11   | 12   | 12   | 13   | 12   | 13   | 0.88 | 0.351503 | 12       | 0.88     | 0.486960 |          |          |
| 254065_at   | At4g25420 | putative protein hypothetical protein - Arabidopsis the gibberellin 20-oxidase           | 16   | 22   | 21   | 33   | 32   | 32   | 30   | 33   | 0.61     | 0.003063 | 30   | 33   | 33   | 55   | 47   | 50   | 53   | 52   | 32   | 51   | 0.62     | 0.000070 | 51       | 0.63     | 0.002039 |          |
| 254066_at   | At4g25480 | transcriptional activator CBF1-like prot transcriptional activator CBF1-like prote       | 74   | 110  | 147  | 233  | 339  | 173  | 111  | 249  | 0.44     | 0.060000 | 41   | 41   | 34   | 47   | 55   | 52   | 69   | 64   | 38   | 57   | 0.67     | 0.015062 | 51       | 0.75     | 0.017338 |          |
| 254067_at   | At4g25460 | hypothetical protein                                                                     | 48   | 58   | 68   | 68   | 70   | 63   | 58   | 67   | 0.87     | 0.241211 | 34   | 38   | 42   | 46   | 37   | 38   | 50   | 44   | 38   | 43   | 0.89     | 0.276108 | 40       | 0.96     | 0.658741 |          |
| 254068_at   | At4g25450 | putative protein similarity to multidrug ABC transporter family protein                  | 79   | 123  | 116  | 116  | 129  | 95   | 106  | 113  | 0.94     | 0.605056 | 115  | 106  | 110  | 139  | 124  | 113  | 126  | 145  | 110  | 136  | 0.81     | 0.056450 | 129      | 0.88     | 0.047280 |          |
| 254069_at   | At4g25440 | putative protein similarity to antisense: Muft/nudix family protein (I) WD-40 reoc       | 37   | 39   | 64   | 54   | 56   | 57   | 47   | 56   | 0.84     | 0.373234 | 2    |      |      |      |      |      |      |      |      |      |          |          |          |          |          |          |

|             |           |                                                                                          |      |      |      |      |      |      |      |          |          |          |      |      |      |      |      |      |      |      |          |      |          |          |      |          |           |
|-------------|-----------|------------------------------------------------------------------------------------------|------|------|------|------|------|------|------|----------|----------|----------|------|------|------|------|------|------|------|------|----------|------|----------|----------|------|----------|-----------|
| 254019_at   | At4g26190 | putative protein mature-parasite-infected expressed protein                              | 249  | 331  | 310  | 371  | 348  | 280  | 296  | 333      | 0.89     | 0.339665 | 340  | 302  | 357  | 480  | 361  | 348  | 337  | 340  | 333      | 373  | 0.89     | 0.334582 | 396  | 0.84     | 0.235048  |
| 253889_at   | At4g26130 | uncharacterized protein - supported by expressed protein                                 | 387  | 436  | 460  | 752  | 723  | 572  | 428  | 682      | 0.63     | 0.013244 | 506  | 593  | 492  | 931  | 761  | 760  | 677  | 671  | 530      | 760  | 0.70     | 0.013824 | 818  | 0.65     | 0.011512  |
| 253999_at   | At4g26160 | putative thioredoxin-thioredoxin - Lilium thioredoxin family protein                     | 128  | 184  | 188  | 201  | 233  | 146  | 167  | 193      | 0.86     | 0.451689 | 175  | 188  | 209  | 286  | 238  | 218  | 252  | 199  | 291      | 239  | 0.80     | 0.062735 | 248  | 0.77     | 0.064674  |
| 253991_at   | At4g26120 | putative nucleic acid-binding protein sH KH domain-containing protein                    | 101  | 147  | 152  | 167  | 140  | 137  | 152  | 167      | 0.87     | 0.332613 | 335  | 391  | 377  | 63   | 82   | 74   | 80   | 80   | 80       | 80   | 1.00     | 0.93091  | 85   | 0.80     | 0.956304  |
| 253992_at   | At4g26060 | putative protein - supported by full-length expressed protein                            | 59   | 81   | 108  | 115  | 109  | 106  | 82   | 110      | 0.75     | 0.131054 | 63   | 72   | 82   | 111  | 83   | 80   | 96   | 86   | 72       | 91   | 0.79     | 0.068303 | 92   | 0.79     | 0.168167  |
| 253993_at   | At4g26070 | mitogen-activated protein kinase kinase mitogen-activated protein kinase kinase          | 172  | 31   | 28   | 25   | 36   | 29   | 25   | 30       | 0.84     | 0.430686 | 19   | 24   | 22   | 21   | 18   | 17   | 25   | 22   | 22       | 21   | 1.05     | 0.632506 | 19   | 1.16     | 0.166315  |
| 253994_at   | At4g26080 | protein phosphatase ABI1 - supported: protein phosphatase 2C ABI1 // PP2C At             | 172  | 219  | 380  | 410  | 471  | 321  | 257  | 401      | 0.84     | 0.136357 | 227  | 203  | 218  | 314  | 299  | 270  | 362  | 347  | 216      | 318  | 0.68     | 0.004048 | 294  | 0.73     | 0.006313  |
| 253995_at   | At4g26090 | putative protein kinase-like protein - supported by full-length expressed protein        | 397  | 574  | 580  | 650  | 397  | 361  | 446  | 393      | 0.86     | 0.014933 | 335  | 381  | 366  | 444  | 423  | 385  | 334  | 385  | 334      | 385  | 0.34     | 0.088784 | 401  | 0.68     | 0.271443  |
| 253996_at   | At4g26110 | nucleosome assembly protein H-like protein nucleosome assembly protein (NAP1) cu         | 610  | 744  | 728  | 688  | 701  | 641  | 693  | 677      | 1.02     | 0.737111 | 852  | 774  | 942  | 1068 | 956  | 753  | 1012 | 964  | 856      | 951  | 0.90     | 0.277769 | 926  | 0.92     | 0.539028  |
| 253997_at   | At4g26090 | disease resistance protein RPS2 - suo: disease resistance protein RPS2 (CC-N)            | 33   | 38   | 42   | 51   | 59   | 46   | 38   | 52       | 0.73     | 0.030061 | 35   | 41   | 80   | 46   | 43   | 49   | 52   | 42   | 44       | 43   | 1.24     | 0.388559 | 40   | 1.31     | 0.444395  |
| 253998_at   | At4g26010 | putative ceroidase ceroidase ATP13 peroxidase, putative                                  | 47   | 33   | 28   | 30   | 28   | 29   | 0.95 | 0.610836 | 26       | 34       | 31   | 25   | 23   | 25   | 21   | 30   | 24   | 1.25 | 0.032169 | 25   | 1.22     | 0.105667 |      |          |           |
| 253999_at   | At4g26200 | 1-aminocyclohexane-1-carboxylate su- 1-aminocyclohexane-1-carboxylate svm                | 27   | 57   | 65   | 63   | 76   | 68   | 56   | 69       | 0.82     | 0.113427 | 40   | 36   | 44   | 38   | 35   | 38   | 47   | 44   | 40       | 40   | 0.99     | 0.839285 | 37   | 1.08     | 0.33806   |
| 254000_at   | At4g26250 | galactinol synthase VSG176 protein ind galactinol synthase, putative                     | 67   | 97   | 105  | 14   | 21   | 20   | 89   | 18       | 4.85     | 0.000802 | 63   | 73   | 60   | 17   | 13   | 15   | 17   | 15   | 15       | 65   | 1.5      | 0.000000 | 22   | 1.00     | 0.000209  |
| 254001_at   | At4g26260 | putative protein PRE87 mRNA, Pinus i expressed protein                                   | 107  | 160  | 255  | 56   | 86   | 82   | 174  | 62       | 2.83     | 0.067591 | 133  | 183  | 131  | 29   | 28   | 31   | 20   | 18   | 149      | 25   | 5.90     | 0.000073 | 29   | 5.05     | 0.002151  |
| 254002_at   | At4g26280 | steroid sulfotransferase - like protein s1 sulfotransferase family protein               | 106  | 187  | 133  | 91   | 108  | 82   | 142  | 94       | 1.51     | 0.128217 | 189  | 212  | 176  | 117  | 77   | 93   | 117  | 109  | 192      | 103  | 1.87     | 0.000429 | 96   | 2.01     | 0.003525  |
| 254003_at   | At4g26290 | hypothetical protein                                                                     | 24   | 30   | 28   | 26   | 27   | 24   | 25   | 107      | 0.413818 | 24       | 24   | 32   | 28   | 29   | 30   | 37   | 30   | 27   | 31       | 0.87 | 0.207118 | 29       | 0.93 | 0.459512 |           |
| 254004_at   | At4g26300 | arginyl-RNA synthetase                                                                   | 388  | 478  | 472  | 537  | 613  | 487  | 446  | 546      | 0.82     | 0.009816 | 347  | 323  | 375  | 509  | 418  | 367  | 413  | 396  | 348      | 420  | 0.83     | 0.077132 | 451  | 0.81     | 0.135177  |
| 254005_at   | At4g26330 | subtilisin-like serine protease contains -subtilase family protein                       | 52   | 67   | 79   | 72   | 91   | 66   | 66   | 76       | 0.86     | 0.356505 | 51   | 50   | 57   | 53   | 47   | 52   | 49   | 49   | 53       | 50   | 1.05     | 0.256496 | 51   | 1.04     | 0.492213  |
| 254006_at   | At4g26340 | putative protein various predicted prot F-box family protein                             | 24   | 27   | 40   | 39   | 39   | 27   | 30   | 35       | 0.86     | 0.484873 | 26   | 24   | 22   | 27   | 21   | 25   | 23   | 25   | 24       | 24   | 1.00     | 0.954333 | 24   | 0.99     | 0.915222  |
| 254007_s_at | At4g26360 | putative protein RNA-directed DNA pol hypothetical protein // non-LTR1 retrotr           | 34   | 47   | 38   | 42   | 46   | 41   | 40   | 43       | 0.92     | 0.480923 | 34   | 49   | 49   | 35   | 32   | 31   | 49   | 43   | 44       | 38   | 1.16     | 0.342339 | 33   | 1.34     | 0.088623  |
| 254008_at   | At4g26380 | hypothetical protein various predicted 1 DC1 domain-containing protein                   | 26   | 25   | 39   | 29   | 36   | 39   | 30   | 35       | 0.86     | 0.404877 | 27   | 26   | 31   | 30   | 24   | 26   | 27   | 27   | 28       | 27   | 1.05     | 0.483192 | 26   | 1.06     | 0.547678  |
| 254009_at   | At4g26390 | ornuvate kinase like protein ornuvate k pyruvate kinase, putative                        | 47   | 88   | 85   | 62   | 65   | 61   | 73   | 62       | 1.18     | 0.455008 | 97   | 130  | 98   | 91   | 65   | 75   | 110  | 95   | 109      | 87   | 1.25     | 0.152691 | 77   | 1.41     | 0.075072  |
| 254010_at   | At4g26240 | putative protein - supported by full-length expressed protein                            | 197  | 265  | 306  | 285  | 326  | 252  | 256  | 288      | 0.89     | 0.450975 | 279  | 326  | 300  | 402  | 314  | 331  | 275  | 274  | 302      | 319  | 0.95     | 0.612081 | 349  | 0.86     | 0.190504  |
| 254011_at   | At4g26370 | putative protein transcription terminant antitermination NusB domain-contains            | 84   | 136  | 127  | 114  | 143  | 102  | 116  | 119      | 0.97     | 0.860244 | 126  | 152  | 125  | 168  | 136  | 134  | 145  | 142  | 134      | 145  | 0.92     | 0.333230 | 146  | 0.92     | 0.446849  |
| 254012_at   | At4g26230 | putative ribosomal protein ribosomal p R05 ribosomal protein L31 (PR31B)                 | 1791 | 2042 | 2044 | 1904 | 2058 | 1834 | 1959 | 1932     | 1.01     | 0.814085 | 2108 | 2054 | 2130 | 2604 | 2201 | 1991 | 2221 | 2135 | 2097     | 2230 | 0.94     | 0.368198 | 2265 | 0.93     | 0.405058  |
| 253855_at   | At4g26220 | caffeoyl-CoA O-methyltransferase - like caffeoyl-CoA 3-O-methyltransferase, put          | 32   | 32   | 45   | 31   | 43   | 31   | 36   | 35       | 1.03     | 0.874860 | 43   | 50   | 44   | 24   | 27   | 28   | 33   | 31   | 46       | 28   | 1.61     | 0.000583 | 26   | 2.55     | 0.001402  |
| 253986_at   | At4g26210 | putative protein predicted protein, Arabidopsis mitochondrial ATP synthase q subunit fa  | 577  | 759  | 812  | 821  | 879  | 708  | 716  | 803      | 0.89     | 0.375174 | 739  | 720  | 723  | 1037 | 779  | 800  | 760  | 768  | 727      | 829  | 0.88     | 0.198151 | 872  | 0.83     | 0.155584  |
| 253987_at   | At4g26270 | putative protein deduced phosphoenolpyruvate carboxylase family protein                  | 280  | 375  | 413  | 387  | 463  | 387  | 356  | 412      | 0.86     | 0.297395 | 328  | 306  | 350  | 379  | 349  | 319  | 407  | 363  | 328      | 362  | 0.91     | 0.166267 | 346  | 0.95     | 0.0413196 |
| 253988_at   | At4g26310 | putative protein elongation factor P (elF elongation factor P (EF-P) family protein      | 428  | 523  | 468  | 290  | 321  | 246  | 230  | 286      | 0.80     | 0.136524 | 238  | 270  | 275  | 368  | 303  | 296  | 242  | 254  | 261      | 297  | 0.88     | 0.344018 | 330  | 0.79     | 0.059662  |
| 253987_at   | At4g26320 | putative protein - supported by cDNA - like protein nucleoside diphosphate kinase (ADP3) | 45   | 48   | 45   | 80   | 63   | 58   | 63   | 68       | 0.85     | 0.614983 | 128  | 153  | 90   | 112  | 98   | 121  | 91   | 88   | 123      | 90   | 0.81     | 0.682391 | 102  | 0.97     | 0.480712  |
| 253989_at   | At4g26400 | putative protein RING zinc finger protein zinc finger (CHC4-type RING finger) fa         | 427  | 558  | 663  | 630  | 720  | 516  | 539  | 622      | 0.87     | 0.410376 | 555  | 577  | 517  | 648  | 571  | 524  | 622  | 603  | 550      | 594  | 0.93     | 0.211318 | 581  | 0.95     | 0.481887  |
| 253959_at   | At4g26410 | putative protein                                                                         | 419  | 547  | 476  | 558  | 643  | 486  | 481  | 562      | 0.86     | 0.236321 | 497  | 497  | 522  | 689  | 587  | 555  | 567  | 544  | 505      | 589  | 0.86     | 0.057194 | 611  | 0.83     | 0.063731  |
| 253960_at   | At4g26420 | putative protein various predicted prot S-adenosyl-L-methionine carboxyl methyl          | 12   | 12   | 23   | 19   | 15   | 17   | 16   | 17       | 0.92     | 0.733752 | 15   | 13   | 17   | 16   | 14   | 28   | 13   | 15   | 17       | 17   | 0.89     | 0.649189 | 14   | 1.04     | 0.753246  |
| 253961_at   | At4g26440 | putative protein SPF1 protein, Isomere WRKY family transcription factor                  | 12   | 17   | 14   | 15   | 14   | 12   | 17   | 14       | 1.10     | 0.450711 | 11   | 12   | 15   | 11   | 14   | 12   | 11   | 11   | 14       | 12   | 1.11     | 0.498210 | 13   | 0.97     | 0.832673  |
| 253962_at   | At4g26460 | hypothetical protein                                                                     | 44   | 42   | 40   | 43   | 49   | 42   | 42   | 45       | 0.94     | 0.339662 | 31   | 47   | 40   | 34   | 32   | 33   | 30   | 32   | 36       | 32   | 1.12     | 0.078696 | 33   | 1.09     | 0.245513  |
| 253963_at   | At4g26470 | putative protein probable calcium-deco calcium-binding EF hand family protein            | 37   | 39   | 57   | 41   | 43   | 49   | 44   | 44       | 1.00     | 0.994375 | 31   | 46   | 50   | 43   | 35   | 31   | 38   | 40   | 42       | 37   | 1.14     | 0.331798 | 36   | 1.17     | 0.390340  |
| 253964_at   | At4g26480 | putative protein at4g26480 KH domain-containing protein                                  | 174  | 190  | 219  | 211  | 237  | 169  | 194  | 206      | 0.94     | 0.648576 | 150  | 158  | 143  | 204  | 160  | 179  | 190  | 151  | 179      | 0.84 | 0.055234 | 175      | 0.86 | 0.188618 |           |
| 253965_at   | At4g26490 | hypothetical protein                                                                     | 43   | 43   | 59   | 37   | 58   | 47   | 58   | 0.81     | 0.409350 | 28       | 37   | 39   | 49   | 34   | 36   | 44   | 40   | 34   | 36       | 44   | 0.42     | 0.007749 | 39   | 0.97     | 0.432768  |
| 253966_at   | At4g26520 | fructose-bisphosphate aldolase fructose-bisphosphate aldolase, cytopl                    | 34   | 49   | 38   | 38   | 45   | 36   | 40   | 40       | 1.01     | 0.962441 | 32   | 32   | 32   | 34   | 25   | 29   | 33   | 29   | 32       | 30   | 1.08     | 0.319142 | 29   | 1.10     | 0.327688  |
| 253967_at   | At4g26550 | putative protein probable membrane o expressed protein                                   | 175  | 221  | 223  | 224  | 242  | 212  | 206  | 226      | 0.91     | 0.335839 | 196  | 221  | 229  | 294  | 256  | 237  | 249  | 232  | 215      | 254  | 0.85     | 0.055317 | 263  | 0.82     | 0.070792  |
| 253968_at   | At4g26560 | putative calcineurin B-like protein calici calcineurin B-like protein, putative          | 179  | 19   | 26   | 23   | 23   | 24   | 21   | 23       | 0.88     | 0.365479 | 17   | 23   | 24   | 19   | 16   | 16   | 23   | 21   | 21       | 19   | 1.13     | 0.336910 | 17   | 1.26     | 0.134288  |
| 253969_at   | At4g26430 | putative protein hypothetical protein Y1 CCP9 anomalous subunit 6 / C5N sub              | 234  | 193  | 228  | 319  | 341  | 256  | 238  | 305      | 0.78     | 0.148817 | 254  | 238  | 300  | 444  | 342  | 320  | 284  | 344  | 320      | 284  | 0.84     | 0.116882 | 376  | 0.78     | 0.069748  |
| 253970_at   | At4g26510 | putative uracil phosphoribosyl transfer uracil phosphoribosyltransferase / LIMP          | 144  | 193  | 201  | 240  | 285  | 207  | 180  | 244      | 0.74     | 0.089800 | 125  | 119  | 136  | 166  | 138  | 152  | 174  | 154  | 182      | 147  | 0.82     | 0.039655 | 147  | 0.83     | 0.232002  |
| 253971_at   | At4g26530 | fructose-bisphosphate aldolase - like p fructose-bisphosphate aldolase                   | 18   | 15   | 19   | 18   | 24   | 21   | 17   | 21       | 0.84     | 0.019180 | 17   | 17   | 17   | 15   | 12   | 17   | 21   | 16   | 17       | 16   | 1.02     | 0.868355 | 15   | 1.13     | 0.213981  |
| 253972_at   | At4g26500 | putative protein Uv31, Schizosacchar: BoA-like family protein / Fe-S metabolism          | 151  | 213  | 208  | 221  | 259  | 195  | 190  | 225      | 0.85     | 0.272541 | 209  | 205  | 209  | 295  | 247  | 243  | 252  | 235  | 208      | 254  | 0.82     | 0.015653 | 261  | 0.79     | 0.032192  |
| 253973_at   | At4g26555 | Excessed protein - supported by cDNA immunochin / FKBP-vloe becdid-ovrlv                 | 189  | 341  | 290  | 217  | 267  | 201  | 273  | 228      | 1.20     | 0.408313 | 271  | 327  | 266  | 330  | 268  | 287  | 305  | 292  | 288      | 296  | 0.87     | 0.674552 | 295  | 0.98     | 0.797669  |
| 253974_at   | At4g26540 | receptor protein kinase - like protein C protein kinase family protein                   | 18   | 14   | 19   | 19   | 24   | 22   | 17   | 21       | 0.81     | 0.781277 | 47   | 46   | 62   | 64   | 45   | 54   | 61   | 52   | 52       | 58   | 0.90     | 0.530504 | 12   | 1.55     | 0.482002  |
| 253975_at   | At4g26600 | putative protein proliferator-1 cell nuclei nuclear protein, putative                    | 96   | 128  | 116  | 157  | 141  | 129  | 113  | 143      | 0.80     | 0.081103 | 77   | 66   | 89   | 101  | 81   | 74   | 81   |      |          |      |          |          |      |          |           |

|             |           |                                                                                                                                               |      |      |      |      |      |      |          |          |          |          |      |      |      |      |      |      |      |      |      |          |          |          |          |          |          |
|-------------|-----------|-----------------------------------------------------------------------------------------------------------------------------------------------|------|------|------|------|------|------|----------|----------|----------|----------|------|------|------|------|------|------|------|------|------|----------|----------|----------|----------|----------|----------|
| 253899_at   | A04g27080 | putative protein protein disulfide-isomerase thioredoxin family protein                                                                       | 513  | 657  | 618  | 689  | 756  | 614  | 596      | 686      | 0.87     | 0.203506 | 502  | 452  | 514  | 690  | 589  | 489  | 583  | 612  | 489  | 593      | 0.83     | 0.061390 | 589      | 0.83     | 0.175532 |
| 253900_at   | A04g27130 | translation initiation factor ; supported t eukaryotic translation initiation factor SU                                                       | 873  | 1070 | 1290 | 1072 | 1117 | 936  | 1077     | 1042     | 1.03     | 0.802676 | 1089 | 1499 | 1196 | 1452 | 1118 | 1242 | 1321 | 1261 | 1272 | 1272     | 0.99     | 0.937532 | 1232     | 1.02     | 0.865409 |
| 253901_at   | A04g27090 | ribosomal protein L14 -like protein ribo S05 ribosomal protein L14 (RPL14B)                                                                   | 4373 | 5145 | 5623 | 5442 | 5934 | 5315 | 5047     | 5564     | 0.91     | 0.276356 | 4171 | 4287 | 4516 | 5248 | 4672 | 4163 | 4790 | 4938 | 4325 | 4762     | 0.91     | 0.128975 | 4694     | 0.92     | 0.324277 |
| 253902_at   | A04g27120 | NVNUM4 - 2S albumin 4 precursor ; sau 2S seed storage protein 4 / 2S albumin i                                                                | 17   | 18   | 10   | 70   | 12   | 9    | 31       | 0.28     | 0.007388 | 4        | 4    | 9    | 8    | 9    | 8    | 9    | 8    | 9    | 8    | 9        | 1.09     | 0.968175 | 8        | 1.09     | 0.968175 |
| 253903_at   | A04g27180 | kinase-related protein kaB - sucoorte kinase-like protein B (KATB)                                                                            | 448  | 607  | 594  | 846  | 872  | 694  | 550      | 604      | 0.68     | 0.027816 | 547  | 470  | 656  | 840  | 599  | 654  | 703  | 557  | 707  | 707      | 0.79     | 0.066479 | 727      | 0.77     | 0.127525 |
| 253904_at   | A04g27120 | NVNUM1 - 2S albumin 1 precursor ; sau 2S seed storage protein 1 / 2S albumin i                                                                | 17   | 18   | 23   | 446  | 23   | 21   | 19       | 163      | 0.12     | 0.366531 | 17   | 13   | 17   | 16   | 13   | 13   | 15   | 13   | 16   | 13       | 1.15     | 0.133011 | 14       | 1.11     | 0.438385 |
| 253905_s_at | A04g27200 | putative protein retrotransposon Oie1-; copia-like retrotransposon family                                                                     | 13   | 14   | 19   | 18   | 23   | 17   | 15       | 18       | 0.88     | 0.281997 | 15   | 14   | 16   | 23   | 18   | 23   | 16   | 14   | 15   | 19       | 0.79     | 0.157911 | 21       | 0.70     | 0.015815 |
| 253906_at   | A04g27200 | putative protein disease resistance protein (NBS-LRR cl                                                                                       | 26   | 31   | 30   | 38   | 37   | 26   | 31       | 38       | 0.85     | 0.218922 | 30   | 34   | 38   | 35   | 31   | 28   | 34   | 26   | 31   | 31       | 1.12     | 0.303729 | 25       | 1.04     | 0.090462 |
| 253907_at   | A04g27250 | putative protein dhvdrokmaemoford 4-n dhvdrokmaemoford 4-reductase family / dhv                                                               | 64   | 77   | 102  | 116  | 96   | 94   | 81       | 102      | 0.80     | 0.189074 | 84   | 98   | 101  | 173  | 115  | 122  | 131  | 122  | 94   | 133      | 0.71     | 0.037958 | 137      | 0.69     | 0.091659 |
| 253908_at   | A04g27260 | GH3 like protein GH3 protein. Givcine auxin-responsive GH3 family protein                                                                     | 90   | 192  | 280  | 93   | 93   | 52   | 187      | 79       | 2.37     | 0.127992 | 207  | 196  | 105  | 175  | 186  | 165  | 375  | 344  | 169  | 249      | 0.68     | 0.265213 | 176      | 0.96     | 0.857693 |
| 253909_at   | A04g27270 | putative protein LEDI-3 protein. Lithox quione reductase family protein                                                                       | 130  | 170  | 176  | 188  | 189  | 166  | 158      | 181      | 0.87     | 0.232799 | 116  | 123  | 136  | 162  | 125  | 106  | 106  | 121  | 125  | 124      | 1.01     | 0.928766 | 131      | 0.96     | 0.762999 |
| 253910_at   | A04g27280 | putative receptor like kinase receptor-L1-Scopus protein kinase, putative                                                                     | 10   | 8    | 10   | 7    | 10   | 5    | 12       | 9        | 1.27     | 0.037573 | 9    | 9    | 11   | 8    | 11   | 10   | 8    | 7    | 9    | 9        | 1.08     | 0.531332 | 10       | 0.98     | 0.878454 |
| 253911_at   | A04g27300 | putative receptor protein kinase receptor-5-Scopus protein kinase, putative                                                                   | 23   | 25   | 38   | 37   | 34   | 39   | 29       | 37       | 0.77     | 0.174833 | 17   | 21   | 23   | 26   | 23   | 22   | 21   | 19   | 20   | 22       | 0.91     | 0.372152 | 23       | 0.86     | 0.236647 |
| 253912_at   | A04g27340 | putative protein met-10+ protein. Neun Met-10+ like family protein                                                                            | 126  | 181  | 179  | 214  | 221  | 189  | 162      | 208      | 0.78     | 0.086977 | 136  | 150  | 166  | 209  | 183  | 162  | 176  | 165  | 150  | 179      | 0.84     | 0.065764 | 165      | 0.81     | 0.098835 |
| 253913_at   | A04g27370 | myosin heavy chain - like protein myos myosin family protein                                                                                  | 128  | 189  | 154  | 171  | 200  | 156  | 157      | 176      | 0.89     | 0.437965 | 110  | 85   | 121  | 141  | 106  | 85   | 138  | 129  | 105  | 120      | 0.88     | 0.399660 | 111      | 0.95     | 0.790417 |
| 253914_at   | A04g27400 | putative protein late embryogenesis at late embryogenesis abundant protein-re                                                                 | 36   | 38   | 51   | 46   | 49   | 51   | 42       | 48       | 0.86     | 0.258848 | 35   | 34   | 53   | 36   | 40   | 40   | 56   | 46   | 37   | 46       | 0.82     | 0.120906 | 42       | 0.98     | 0.262592 |
| 253915_at   | A04g27420 | putative protein D. melanoaster P. elter ABC transporter family protein                                                                       | 2342 | 1951 | 3024 | 2699 | 3202 | 2394 | 0.91     | 0.583559 | 2320     | 2707     | 1838 | 2332 | 1911 | 2034 | 2567 | 2563 | 2318 | 2280 | 1.02 | 0.891689 | 2099     | 1.11     | 0.493273 |          |          |
| 253916_at   | A04g27440 | putative protein RING zinc finger protein (C2H2 type) family protein                                                                          | 256  | 335  | 369  | 351  | 381  | 303  | 320      | 345      | 0.93     | 0.570746 | 337  | 317  | 331  | 435  | 340  | 322  | 394  | 380  | 328  | 374      | 0.88     | 0.139795 | 366      | 0.90     | 0.351631 |
| 253917_at   | A04g27380 | putative protein - supported by full-length expressed protein                                                                                 | 185  | 220  | 278  | 240  | 257  | 241  | 228      | 246      | 0.93     | 0.546866 | 215  | 284  | 248  | 377  | 266  | 270  | 265  | 257  | 249  | 287      | 0.87     | 0.298247 | 305      | 0.82     | 0.250971 |
| 253918_at   | A04g27320 | putative protein - supported by full-length universal stress protein (USP) family prc                                                         | 263  | 294  | 328  | 396  | 401  | 347  | 295      | 381      | 0.77     | 0.027934 | 296  | 336  | 343  | 485  | 363  | 401  | 377  | 325  | 394  | 384      | 0.83     | 0.091574 | 397      | 0.82     | 0.194204 |
| 253919_at   | A04g27350 | putative protein - supported by full-length expressed protein                                                                                 | 100  | 103  | 125  | 162  | 148  | 124  | 109      | 145      | 0.76     | 0.059549 | 110  | 123  | 124  | 161  | 114  | 91   | 126  | 116  | 119  | 121      | 0.98     | 0.881956 | 122      | 0.98     | 0.899974 |
| 253920_at   | A04g27230 | histone H2A- like protein histone H2A- histone H2A, putative                                                                                  | 1040 | 1359 | 1262 | 1464 | 1483 | 1345 | 1221     | 1431     | 0.85     | 0.113133 | 879  | 1190 | 1173 | 1551 | 1100 | 973  | 1147 | 1166 | 1081 | 1187     | 0.91     | 0.500491 | 1208     | 0.89     | 0.563565 |
| 253923_at   | A04g27390 | putative protein hvhothetical protein. S- expressed protein                                                                                   | 88   | 106  | 126  | 135  | 135  | 110  | 107      | 127      | 0.84     | 0.225483 | 89   | 103  | 114  | 152  | 114  | 113  | 114  | 102  | 119  | 108      | 0.86     | 0.231545 | 126      | 0.81     | 0.178074 |
| 253924_at   | A04g27330 | NOZZLE/SPOROCTYLESS - sucoor sporocyteless (SPL)                                                                                              | 32   | 43   | 42   | 43   | 37   | 39   | 39       | 40       | 0.98     | 0.876849 | 36   | 39   | 37   | 50   | 37   | 40   | 56   | 46   | 37   | 46       | 0.82     | 0.120906 | 42       | 0.98     | 0.262592 |
| 253925_at   | A04g27460 | putative protein D. melanoaster P. elter ABC transporter family protein                                                                       | 17   | 25   | 24   | 26   | 22   | 25   | 24       | 1.02     | 0.903789 | 22       | 22   | 29   | 22   | 16   | 21   | 21   | 24   | 20   | 121  | 0.114117 | 20       | 1.24     | 0.200427 |          |          |
| 253926_at   | A04g27460 | putative protein RING zinc finger protein (C2H2 type) family protein                                                                          | 26   | 36   | 41   | 43   | 37   | 34   | 38       | 0.91     | 0.544534 | 23       | 23   | 27   | 28   | 22   | 23   | 32   | 30   | 24   | 27   | 0.89     | 0.320947 | 24       | 0.98     | 0.873153 |          |
| 253927_at   | A04g27470 | putative RING zinc finger protein Arabi zinc finger (C3HC4-type RING finger) fa                                                               | 66   | 86   | 99   | 105  | 108  | 85   | 86       | 99       | 0.86     | 0.268274 | 85   | 96   | 105  | 112  | 102  | 100  | 114  | 105  | 96   | 106      | 0.90     | 0.100775 | 104      | 0.91     | 0.265456 |
| 253928_at   | A04g27480 | putative protein virus protein putative protein dvcolvstranferase family 14 protein / c                                                       | 101  | 129  | 142  | 163  | 172  | 158  | 124      | 164      | 0.75     | 0.035249 | 93   | 96   | 98   | 106  | 96   | 82   | 124  | 102  | 96   | 102      | 0.94     | 0.150841 | 95       | 0.91     | 0.914108 |
| 253929_at   | A04g27480 | putative protein RNA nucleodivtranafrs 3 exonuclease family domain 1-cont                                                                     | 188  | 251  | 236  | 248  | 316  | 225  | 225      | 262      | 0.88     | 0.319483 | 215  | 231  | 235  | 342  | 285  | 271  | 268  | 244  | 227  | 286      | 0.79     | 0.024635 | 300      | 0.76     | 0.032246 |
| 253930_at   | A04g27500 | putative protein curno interacted protein                                                                                                     | 1043 | 1035 | 1181 | 1242 | 1211 | 0.83 | 0.045133 | 161      | 132      | 170      | 154  | 162  | 171  | 161  | 154  | 162  | 140  | 135  | 107  | 103      | 0.81     | 0.021937 | 107      | 0.81     | 0.066503 |
| 253931_at   | A04g27510 | putative protein - expressed protein                                                                                                          | 73   | 76   | 86   | 92   | 98   | 85   | 78       | 92       | 0.85     | 0.066349 | 55   | 38   | 55   | 51   | 44   | 59   | 51   | 49   | 52   | 52       | 0.95     | 0.611673 | 51       | 0.98     | 0.863910 |
| 253932_at   | A04g27530 | putative protein - expressed protein                                                                                                          | 16   | 19   | 24   | 89   | 22   | 21   | 20       | 44       | 0.45     | 0.343397 | 17   | 15   | 20   | 17   | 16   | 14   | 23   | 18   | 17   | 18       | 0.99     | 0.921281 | 16       | 1.10     | 0.418304 |
| 253933_at   | A04g27440 | prochlorophyllide reductase precursor prochlorophyllide reductase B, chloroc                                                                  | 982  | 1707 | 1322 | 906  | 1634 | 961  | 1337     | 1133     | 1.18     | 0.566755 | 1309 | 1534 | 1078 | 1108 | 1059 | 1227 | 1288 | 1290 | 1307 | 1194     | 1.09     | 0.365095 | 1131     | 1.16     | 0.279417 |
| 253934_at   | A04g27410 | putative protein Arabidopsis thaliana n no acical meristem (NAM) family protein                                                               | 54   | 60   | 224  | 88   | 79   | 67   | 123      | 78       | 1.51     | 0.437346 | 164  | 154  | 115  | 172  | 176  | 136  | 200  | 192  | 144  | 175      | 0.82     | 0.140438 | 161      | 0.89     | 0.428116 |
| 253935_at   | A04g27540 | putative protein - supported by full-l- overnated pal aceceptor (PRA1) protein-<br>putative protein stem-specific protein - expressed protein | 84   | 110  | 124  | 102  | 119  | 107  | 106      | 110      | 0.97     | 0.785876 | 110  | 130  | 118  | 174  | 127  | 134  | 131  | 115  | 119  | 136      | 0.88     | 0.274254 | 145      | 0.82     | 0.176847 |
| 253936_at   | A04g27450 | putative protein stem-specific protein - expressed protein                                                                                    | 191  | 364  | 410  | 137  | 108  | 78   | 322      | 108      | 2.99     | 0.036566 | 356  | 528  | 342  | 217  | 166  | 198  | 371  | 356  | 409  | 262      | 1.56     | 0.084887 | 194      | 1.21     | 0.025041 |
| 253937_at   | A04g27520 | putative protein ENOD20 gene. Medici. plastocyanin-like domain-containing prot                                                                | 662  | 723  | 1183 | 907  | 1136 | 797  | 856      | 947      | 0.90     | 0.681893 | 464  | 466  | 436  | 775  | 533  | 605  | 621  | 605  | 455  | 628      | 0.72     | 0.018057 | 638      | 0.71     | 0.065020 |
| 253938_at   | A04g27430 | COP1-interacting protein 7 (COP1) - sau COP1-interacting protein 7 (COP1)                                                                     | 116  | 170  | 192  | 151  | 162  | 167  | 185      | 50       | 0.82     | 0.025133 | 161  | 132  | 170  | 181  | 168  | 156  | 171  | 161  | 154  | 162      | 0.84     | 0.043402 | 158      | 0.97     | 0.645456 |
| 253939_at   | A04g27435 | Expressed protein - supported by cDNV expressed protein                                                                                       | 38   | 50   | 57   | 67   | 72   | 74   | 48       | 71       | 0.68     | 0.021326 | 41   | 48   | 53   | 76   | 62   | 56   | 53   | 56   | 47   | 60       | 0.78     | 0.073672 | 64       | 0.73     | 0.071636 |
| 253940_at   | A04g27550 | trehalase-6-phosphate synthase - like. alpha. alpha-trehalase-ohosaccharide synth                                                             | 42   | 52   | 67   | 104  | 98   | 83   | 54       | 95       | 0.56     | 0.011728 | 56   | 53   | 56   | 74   | 60   | 66   | 107  | 84   | 55   | 78       | 0.70     | 0.082806 | 67       | 0.83     | 0.057560 |
| 253941_s_at | A04g27570 | UDP thiamose-antivocanin-3-oluc glycosyltransferase family protein                                                                            | 84   | 90   | 97   | 161  | 178  | 184  | 90       | 175      | 0.52     | 0.000440 | 95   | 73   | 99   | 146  | 146  | 140  | 189  | 178  | 89   | 160      | 0.56     | 0.002629 | 144      | 0.62     | 0.002718 |
| 253942_at   | A04g27580 | Expressed protein - supported by cDNA cooer protein-related                                                                                   | 57   | 57   | 54   | 68   | 77   | 45   | 50       | 63       | 0.78     | 0.308076 | 49   | 48   | 48   | 174  | 136  | 118  | 110  | 78   | 47   | 124      | 0.58     | 0.010539 | 143      | 0.33     | 0.004545 |
| 253943_at   | A04g27540 | putative protein RING zinc finger protein importin beta-2 subunit family protein                                                              | 178  | 222  | 262  | 275  | 307  | 256  | 221      | 279      | 0.79     | 0.106388 | 93   | 140  | 116  | 104  | 103  | 84   | 90   | 104  | 88   | 90       | 1.04     | 0.222442 | 105      | 0.91     | 0.471146 |
| 253944_at   | A04g27650 | petola (PEL1) - petola (PEL1)                                                                                                                 | 186  | 229  | 242  | 229  | 277  | 208  | 219      | 238      | 0.92     | 0.514246 | 213  | 183  | 214  | 293  | 256  | 234  | 231  | 225  | 203  | 248      | 0.82     | 0.049689 | 261      | 0.78     | 0.044867 |
| 253945_at   | A04g27660 | heat shock protein                                                                                                                            | 96   | 114  | 123  | 129  | 142  | 132  | 111      | 134      | 0.83     | 0.059573 | 120  | 130  | 140  | 181  | 146  | 135  | 131  | 125  | 130  | 144      | 0.90     | 0.347027 | 154      | 0.84     | 0.175292 |
| 253946_at   | A04g27670 | 25.3 kDa small heat shock protein. chlor                                                                                                      | 44   | 56   | 61   | 72   | 72   | 66   | 54       | 70       | 0.77     | 0.043901 | 41   | 36   | 50   | 58   | 50   | 47   | 52   | 51   | 42   | 52       | 0.81     | 0.051357 | 52       | 0.82     | 0.152524 |
| 253947_at   | A04g27690 | putative protein essential for embryo vacuolar protein sorting-associated prot                                                                | 225  | 302  | 312  | 374  | 389  | 329  | 440      | 365      | 0.77     | 0.043901 | 353  | 360  | 357  | 303  | 303  | 376  | 405  | 377  | 357  | 416      | 0.86     | 0.171958 |          |          |          |

|             |          |                                                                                       |                                            |      |      |      |      |      |      |      |      |          |          |      |      |      |      |      |      |      |      |      |      |          |          |          |          |          |          |
|-------------|----------|---------------------------------------------------------------------------------------|--------------------------------------------|------|------|------|------|------|------|------|------|----------|----------|------|------|------|------|------|------|------|------|------|------|----------|----------|----------|----------|----------|----------|
| 253804_at   | A4g28230 | putative protein                                                                      | expressed protein                          | 154  | 209  | 207  | 226  | 279  | 224  | 190  | 243  | 0.178    | 0.106359 | 178  | 178  | 258  | 280  | 250  | 213  | 209  | 198  | 205  | 230  | 0.89     | 0.408122 | 248      | 0.83     | 0.263807 |          |
| 253805_at   | A4g28260 | putative protein                                                                      | expressed protein                          | 464  | 776  | 858  | 611  | 683  | 476  | 699  | 590  | 1.18     | 0.462603 | 445  | 398  | 427  | 525  | 458  | 413  | 643  | 590  | 423  | 528  | 0.80     | 0.118801 | 466      | 0.91     | 0.290455 |          |
| 253806_at   | A4g28270 | outative protein Arabidopsis thaliana R zinc finger (C3HC4-type RING finger) fa       |                                            | 31   | 75   | 77   | 56   | 45   | 40   | 61   | 47   | 1.29     | 0.440836 | 83   | 107  | 80   | 125  | 106  | 101  | 127  | 118  | 90   | 115  | 0.78     | 0.032901 | 110      | 0.81     | 0.137062 |          |
| 253807_at   | A4g28250 | putative protein                                                                      | GPI-anchored protein                       | 27   | 357  | 417  | 42   | 45   | 34   | 42   | 42   | 0.80     | 0.214863 | 29   | 32   | 37   | 32   | 31   | 28   | 33   | 26   | 33   | 28   | 1.15     | 0.16087  | 30       | 0.28     | 0.040285 |          |
| 253808_at   | A4g28300 | predicted oroline-rich protein hydroxide hydroxide-rich olcoconer family c            |                                            | 205  | 320  | 353  | 300  | 342  | 234  | 293  | 292  | 1.00     | 0.991220 | 229  | 247  | 227  | 323  | 298  | 259  | 310  | 290  | 234  | 296  | 0.79     | 0.006666 | 293      | 0.80     | 0.040285 |          |
| 253809_at   | A4g28320 | putative (1-4)-beta-mannan endohydrc alcovsly hydrolase family 5 protein / celli      |                                            | 69   | 75   | 82   | 96   | 94   | 81   | 75   | 90   | 0.84     | 0.089144 | 67   | 68   | 75   | 110  | 86   | 79   | 74   | 73   | 70   | 85   | 0.83     | 0.175141 | 92       | 0.76     | 0.091480 |          |
| 253810_at   | A4g28220 | NADg28220 NADH dehydrogenase NADH NADH dehydrogenase-related                          |                                            | 251  | 321  | 287  | 353  | 399  | 326  | 286  | 360  | 0.80     | 0.087524 | 279  | 216  | 257  | 379  | 338  | 298  | 332  | 310  | 251  | 329  | 0.76     | 0.018284 | 335      | 0.75     | 0.059675 |          |
| 253811_at   | A4g28190 | hypothetical protein                                                                  | supported by full-length expressed protein | 574  | 550  | 678  | 551  | 678  | 574  | 600  | 530  | 0.80     | 0.214863 | 529  | 514  | 529  | 678  | 615  | 530  | 615  | 530  | 615  | 734  | 0.75     | 0.003344 | 721      | 0.75     | 0.040886 |          |
| 253812_at   | A4g28240 | outative wound induced protein wound NADH dehydrogenase-related                       |                                            | 470  | 839  | 1134 | 978  | 1131 | 822  | 814  | 977  | 0.83     | 0.485096 | 1252 | 1392 | 1254 | 1850 | 1615 | 1558 | 1643 | 1610 | 1299 | 1655 | 0.78     | 0.003279 | 1674     | 0.78     | 0.020376 |          |
| 253813_at   | A4g28150 | putative oround hvothetical protein -J expressed protein                              |                                            | 34   | 31   | 40   | 37   | 46   | 33   | 35   | 39   | 0.89     | 0.414742 | 30   | 32   | 39   | 34   | 35   | 34   | 31   | 33   | 34   | 34   | 1.02     | 0.773637 | 34       | 0.99     | 0.932954 |          |
| 253814_at   | A4g28290 | outative protein - supported by full-length expressed protein                         |                                            | 61   | 117  | 133  | 104  | 85   | 88   | 140  | 92   | 1.13     | 0.636674 | 128  | 151  | 133  | 231  | 140  | 139  | 198  | 200  | 138  | 181  | 0.76     | 0.127443 | 170      | 0.81     | 0.362302 |          |
| 253815_at   | A4g28250 | outative beta-exansin/allenone protein beta-exansin, putative (EXPB3)                 |                                            | 123  | 157  | 147  | 233  | 192  | 182  | 142  | 205  | 0.89     | 0.022035 | 192  | 215  | 235  | 344  | 254  | 240  | 287  | 274  | 214  | 280  | 0.77     | 0.042384 | 279      | 0.77     | 0.134005 |          |
| 253816_at   | A4g28210 | hypothetical protein                                                                  | supported by full-length expressed protein | 170  | 225  | 208  | 233  | 272  | 207  | 201  | 237  | 0.85     | 0.214112 | 188  | 212  | 229  | 330  | 250  | 230  | 271  | 237  | 210  | 263  | 0.70     | 0.079832 | 270      | 0.75     | 0.140021 |          |
| 253817_at   | A4g28310 | hypothetical protein - supported by full-length expressed protein                     |                                            | 347  | 342  | 309  | 436  | 440  | 401  | 332  | 426  | 0.78     | 0.005407 | 332  | 364  | 411  | 565  | 450  | 350  | 348  | 354  | 369  | 413  | 0.89     | 0.483691 | 455      | 0.81     | 0.264661 |          |
| 253818_at   | A4g28330 | hypothetical protein                                                                  | hypothetical protein                       | 128  | 138  | 158  | 153  | 178  | 159  | 141  | 163  | 0.86     | 0.138496 | 143  | 143  | 146  | 251  | 167  | 154  | 174  | 157  | 144  | 181  | 0.80     | 0.177605 | 191      | 0.75     | 0.199887 |          |
| 253819_at   | A4g28350 | receptor protein kinase like protein lect lect protein kinase family protein          |                                            | 27   | 30   | 44   | 41   | 47   | 40   | 34   | 43   | 0.79     | 0.206072 | 33   | 23   | 34   | 25   | 28   | 25   | 36   | 28   | 30   | 28   | 1.06     | 0.675253 | 26       | 1.15     | 0.343885 |          |
| 253820_at   | A4g28370 | hypothetical protein                                                                  | zinc finger (C3HC4-type RING finger) fa    | 137  | 178  | 168  | 216  | 211  | 174  | 160  | 200  | 0.80     | 0.091331 | 117  | 101  | 125  | 179  | 157  | 122  | 149  | 145  | 114  | 150  | 0.76     | 0.035713 | 153      | 0.75     | 0.101656 |          |
| 253821_at   | A4g28380 | extensin-like protein extensin-like orote leucine-rich repeat family protein          |                                            | 10   | 13   | 14   | 12   | 15   | 14   | 12   | 13   | 0.88     | 0.316850 | 9    | 9    | 13   | 13   | 13   | 14   | 9    | 12   | 11   | 12   | 0.86     | 0.327478 | 14       | 0.78     | 0.117497 |          |
| 253822_at   | A4g28410 | hypothetical protein                                                                  | aminotransferase-related                   | 24   | 29   | 33   | 39   | 34   | 27   | 35   | 0.76 | 0.047903 | 25       | 19   | 33   | 25   | 24   | 19   | 30   | 27   | 26   | 25   | 1.02 | 0.880732 | 23       | 1.13     | 0.559307 |          |          |
| 253795_at   | A4g28420 | tyrosine transaminase-like protein tyro aminotransferase, putative                    |                                            | 13   | 17   | 23   | 17   | 21   | 18   | 18   | 19   | 0.96     | 0.820528 | 14   | 14   | 19   | 18   | 13   | 14   | 20   | 18   | 16   | 17   | 0.95     | 0.698018 | 15       | 1.05     | 0.740887 |          |
| 253796_at   | A4g28460 | hypothetical protein                                                                  | hypothetical protein                       | 55   | 57   | 86   | 83   | 79   | 77   | 66   | 79   | 0.83     | 0.262922 | 41   | 37   | 44   | 48   | 37   | 45   | 46   | 46   | 44   | 0.91 | 0.259507 | 43       | 0.94     | 0.553008 |          |          |
| 253797_at   | A4g28470 | outative protein 55.11 protein homolog 26S proteasome regulatory subunit, outi        |                                            | 297  | 241  | 209  | 250  | 256  | 219  | 216  | 242  | 0.89     | 0.205037 | 183  | 165  | 223  | 238  | 213  | 182  | 246  | 237  | 190  | 223  | 0.85     | 0.150108 | 211      | 0.90     | 0.429357 |          |
| 253798_at   | A4g28500 | predicted protein CUC2 (involved in or no apical meristem (NAM) family protein        |                                            | 47   | 59   | 72   | 81   | 88   | 66   | 59   | 78   | 0.75     | 0.118325 | 42   | 46   | 61   | 66   | 59   | 48   | 51   | 52   | 50   | 55   | 0.89     | 0.362534 | 58       | 0.86     | 0.337864 |          |
| 253767_at   | A4g28520 | 12S cruciferin seed storage protein                                                   | 12S seed storage protein, outative / cruc  | 31   | 40   | 44   | 2185 | 42   | 39   | 38   | 755  | 0.05     | 0.372523 | 29   | 29   | 31   | 31   | 29   | 32   | 34   | 30   | 30   | 31   | 0.96     | 0.320235 | 31       | 0.98     | 0.487562 |          |
| 253768_at   | A4g28550 | putative protein                                                                      | RapGAP/TEC domain-containing protein       | 55   | 78   | 81   | 88   | 99   | 78   | 71   | 89   | 0.81     | 0.164314 | 59   | 55   | 64   | 76   | 53   | 59   | 60   | 54   | 59   | 60   | 0.99     | 0.895991 | 62       | 0.95     | 0.698410 |          |
| 253769_at   | A4g28560 | putative protein (fragment) protein kinase leucine-rich repeat family protein (fragm  |                                            | 209  | 238  | 262  | 130  | 118  | 108  | 237  | 119  | 0.99     | 0.002300 | 126  | 131  | 150  | 107  | 91   | 92   | 93   | 98   | 136  | 96   | 1.41     | 0.000558 | 97       | 1.41     | 0.015176 |          |
| 253770_at   | A4g28540 | putative protein kinase ADK1-like protein protein kinase kinase, putative             |                                            | 105  | 131  | 128  | 162  | 160  | 149  | 121  | 157  | 0.77     | 0.016820 | 114  | 120  | 136  | 168  | 150  | 118  | 155  | 152  | 123  | 148  | 0.83     | 0.082563 | 145      | 0.85     | 0.245865 |          |
| 253771_at   | A4g28430 | hypothetical protein - supported by full-length protein family protein                |                                            | 32   | 50   | 42   | 45   | 51   | 48   | 41   | 48   | 0.86     | 0.284731 | 34   | 33   | 39   | 49   | 34   | 37   | 38   | 34   | 35   | 39   | 0.92     | 0.446469 | 40       | 0.88     | 0.395317 |          |
| 253772_at   | A4g28395 | Excessed protein - supported by full-length lipid transfer protein, putative          |                                            | 35   | 49   | 41   | 44   | 46   | 44   | 42   | 45   | 0.94     | 0.508118 | 38   | 39   | 40   | 40   | 38   | 32   | 37   | 30   | 36   | 39   | 1.13     | 0.062017 | 36       | 1.09     | 0.140072 |          |
| 253773_s_at | A4g28360 | Excessed protein - supported by full-length ribosomal protein L22 family protein (l / |                                            | 436  | 505  | 519  | 736  | 563  | 505  | 668  | 575  | 0.80     | 0.092555 | 602  | 638  | 605  | 765  | 684  | 615  | 730  | 671  | 821  | 735  | 0.84     | 0.223748 | 821      | 0.76     | 0.095469 |          |
| 253774_s_at | A4g28530 | NAM / CUC2-like protein No apical m or no apical meristem (NAM) family protein        |                                            | 47   | 52   | 66   | 71   | 66   | 62   | 55   | 66   | 0.83     | 0.143931 | 41   | 42   | 50   | 42   | 46   | 50   | 59   | 50   | 44   | 49   | 0.90     | 0.296072 | 46       | 0.97     | 0.709162 |          |
| 253775_at   | A4g28440 | putative protein T01B08.14 gene, BAC DNA-binding protein-related                      |                                            | 1205 | 1598 | 1807 | 2015 | 2286 | 1892 | 1537 | 2064 | 0.74     | 0.067186 | 1600 | 1881 | 1879 | 2682 | 2120 | 2014 | 1842 | 1780 | 1787 | 2087 | 0.86     | 0.229121 | 2272     | 0.79     | 0.099895 |          |
| 253776_at   | A4g28390 | ADP-ATP carrier-like protein ADP-ATP ADFP, ATP carrier protein, mitochondrial,        |                                            | 165  | 194  | 242  | 234  | 248  | 219  | 200  | 234  | 0.86     | 0.234390 | 170  | 224  | 193  | 280  | 191  | 187  | 196  | 216  | 187  | 196  | 214      | 0.91     | 0.499835 | 219      | 0.89     | 0.526528 |
| 253777_at   | A4g28460 | SOF1 protein-like protein SOF1 (involve transducin family protein / WD-40 repeat      |                                            | 170  | 178  | 181  | 224  | 241  | 194  | 177  | 220  | 0.80     | 0.038397 | 181  | 167  | 193  | 271  | 226  | 198  | 225  | 206  | 179  | 225  | 0.80     | 0.044653 | 231      | 0.78     | 0.087462 |          |
| 253778_at   | A4g28480 | heat-shock protein heat-shock protein                                                 | DNAJ heat shock family protein             | 197  | 184  | 204  | 287  | 300  | 254  | 195  | 280  | 0.69     | 0.004684 | 215  | 217  | 252  | 393  | 301  | 257  | 251  | 225  | 228  | 285  | 0.80     | 0.204283 | 317      | 0.72     | 0.099612 |          |
| 253779_at   | A4g28490 | receptor-like protein kinase 29 precursor leucine-rich repeat transmembrane orot      |                                            | 33   | 37   | 42   | 30   | 27   | 29   | 33   | 29   | 1.30     | 0.042289 | 42   | 47   | 42   | 51   | 32   | 30   | 59   | 49   | 44   | 44   | 0.99     | 0.957093 | 37       | 1.17     | 0.403212 |          |
| 253780_at   | A4g28400 | protein phosphatase 2C-like protein protein phosphatase 2C, outative / PP2C           |                                            | 196  | 233  | 261  | 337  | 368  | 290  | 230  | 332  | 0.69     | 0.026290 | 152  | 218  | 179  | 295  | 235  | 194  | 231  | 218  | 183  | 234  | 0.78     | 0.100332 | 241      | 0.76     | 0.175622 |          |
| 253781_at   | A4g28580 | putative protein predicted protein, Arat maxoresom transporter CofA-like protein      |                                            | 46   | 50   | 34   | 28   | 34   | 30   | 29   | 31   | 0.95     | 0.210925 | 16   | 22   | 16   | 22   | 19   | 21   | 20   | 18   | 21   | 20   | 1.05     | 0.645962 | 20       | 0.95     | 0.736987 |          |
| 253782_at   | A4g28590 | hypothetical protein                                                                  | expressed protein                          | 44   | 46   | 52   | 52   | 57   | 52   | 47   | 54   | 0.88     | 0.086920 | 44   | 50   | 54   | 52   | 49   | 46   | 49   | 45   | 49   | 48   | 1.02     | 0.703798 | 49       | 1.01     | 0.914583 |          |
| 253783_at   | A4g28600 | outative protein predicted protein, Arat calmodulin-binding protein                   |                                            | 231  | 250  | 299  | 333  | 372  | 285  | 260  | 330  | 0.79     | 0.097948 | 275  | 261  | 290  | 415  | 352  | 323  | 379  | 364  | 275  | 367  | 0.75     | 0.004972 | 363      | 0.76     | 0.035979 |          |
| 253784_at   | A4g28610 | outative protein VREBP-1, Nicotiana t mrv family transcription factor, outative ,     |                                            | 122  | 164  | 172  | 159  | 179  | 137  | 153  | 158  | 0.97     | 0.792518 | 118  | 132  | 147  | 192  | 143  | 142  | 133  | 139  | 133  | 150  | 0.89     | 0.315994 | 159      | 0.83     | 0.228217 |          |
| 253785_s_at | A4g28620 | ABC transporter - like protein ABC tr ABC transporter family protein (l / ABC tr      |                                            | 58   | 73   | 78   | 76   | 93   | 76   | 71   | 82   | 0.86     | 0.235474 | 38   | 37   | 39   | 46   | 51   | 35   | 47   | 40   | 38   | 44   | 0.87     | 0.259043 | 44       | 0.87     | 0.306941 |          |
| 253786_at   | A4g28650 | receptor protein kinase-like protein rec leucine-rich repeat transmembrane prot       |                                            | 44   | 48   | 68   | 60   | 66   | 59   | 43   | 62   | 0.87     | 0.328911 | 40   | 49   | 52   | 47   | 48   | 46   | 38   | 45   | 48   | 44   | 0.86     | 0.431842 | 44       | 1.05     | 0.695169 |          |
| 253787_at   | A4g28670 | serine/threonine kinase-like protein rec protein kinase-like protein (l /             |                                            | 15   | 12   | 17   | 15   | 19   | 15   | 15   | 16   | 0.90     | 0.466431 | 13   | 19   | 18   | 13   | 17   | 11   | 17   | 12   | 17   | 14   | 1.16     | 0.350099 | 14       | 1.20     | 0.368840 |          |
| 253788_at   | A4g28680 | aromatic amino-acid decarboxylase - l tyrosine decarboxylase, putative                |                                            | 46   | 78   | 75   | 46   | 53   | 76   | 66   | 58   | 1.15     | 0.575533 | 30   | 42   | 61   | 31   | 41   | 35   | 28   | 33   | 44   | 34   | 1.32     | 0.183225 | 36       | 1.25     | 0.404108 |          |
| 253789_at   | A4g28570 | outative protein predicted protein, Arat calmodulin-binding protein                   |                                            | 64   | 103  | 101  | 115  | 113  | 99   | 89   | 109  | 0.82     | 0.219753 | 120  | 114  | 135  | 166  | 141  | 121  | 160  | 158  | 123  | 149  | 0.83     | 0.068004 | 143      | 0.86     | 0.243678 |          |
| 253790_at   | A4g28660 | chotolavstem II protein N - like chotolavstem II reaction centre W (PsbH              |                                            | 123  | 165  | 185  | 225  | 226  | 158  | 127  | 165  | 0.97     | 0.059065 | 167  | 225  | 239  | 283  | 265  | 213  | 281  | 227  | 1625 | 28   |          |          |          |          |          |          |

|           |           |                                                                                        |      |      |      |      |      |      |      |          |          |          |      |      |      |      |      |      |      |      |      |      |          |          |          |          |          |          |
|-----------|-----------|----------------------------------------------------------------------------------------|------|------|------|------|------|------|------|----------|----------|----------|------|------|------|------|------|------|------|------|------|------|----------|----------|----------|----------|----------|----------|
| 253717_at | Ak4g29440 | putative protein putative suppressor pr expressed protein                              | 66   | 67   | 79   | 83   | 89   | 70   | 71   | 81       | 0.87     | 0.219493 | 66   | 53   | 63   | 78   | 66   | 61   | 69   | 59   | 60   | 67   | 0.91     | 0.293643 | 68       | 0.89     | 0.295255 |          |
| 253718_at | Ak4g29450 | serine/threonine-specific receptor prot leucine-rich repeat protein kinase, putat      | 24   | 20   | 32   | 27   | 28   | 33   | 25   | 29       | 0.87     | 0.394902 | 19   | 22   | 24   | 16   | 21   | 19   | 24   | 16   | 22   | 19   | 1.11     | 0.406867 | 19       | 1.14     | 0.298587 |          |
| 253719_at | Ak4g29490 | autative protein, fragment oridinate - S Xaa-Pro dipeptidase, autative / oridias       | 173  | 223  | 236  | 278  | 326  | 257  | 211  | 287      | 0.73     | 0.053467 | 234  | 249  | 233  | 375  | 276  | 279  | 287  | 262  | 239  | 296  | 0.81     | 0.81782  | 310      | 0.77     | 0.097053 |          |
| 253720_at | Ak4g29500 | acid phosphatase-like protein acid phc acid phosphatase class B family protein         | 38   | 37   | 36   | 43   | 34   | 38   | 38   | 1.00     | 0.901077 | 41       | 30   | 53   | 37   | 43   | 37   | 43   | 37   | 40   | 39   | 43   | 0.92     | 0.810031 | 47       | 0.91     | 0.719304 |          |
| 253721_at | Ak4g29250 | hyvothetical protein : supported by full-: transferase family protein                  | 50   | 50   | 73   | 56   | 64   | 65   | 58   | 62       | 0.93     | 0.637635 | 35   | 37   | 52   | 44   | 35   | 32   | 48   | 40   | 41   | 40   | 1.04     | 0.806269 | 37       | 1.12     | 0.542218 |          |
| 253722_at | Ak4g29190 | putative protein zinc finger transcription zinc finger (CCHC-type) family protein      | 220  | 137  | 618  | 476  | 505  | 352  | 391  | 444      | 0.88     | 0.699270 | 526  | 462  | 479  | 603  | 640  | 638  | 711  | 651  | 489  | 649  | 0.75     | 0.010098 | 627      | 0.78     | 0.003547 |          |
| 253723_at | Ak4g29240 | extensin-like protein - supported by full-: leucine-rich repeat family protein / exten | 112  | 130  | 140  | 196  | 226  | 165  | 127  | 196      | 0.65     | 0.024155 | 164  | 194  | 151  | 264  | 211  | 189  | 230  | 220  | 170  | 223  | 0.76     | 0.030739 | 221      | 0.77     | 0.114696 |          |
| 253724_at | Ak4g29280 | putative protein - supported by full-: leucine-rich repeat family protein / exten      | 112  | 130  | 140  | 196  | 226  | 165  | 127  | 196      | 0.65     | 0.024155 | 164  | 194  | 151  | 264  | 211  | 189  | 230  | 220  | 170  | 223  | 0.76     | 0.030739 | 221      | 0.77     | 0.114696 |          |
| 253725_at | Ak4g29340 | profilin 3 - supported by full-length cDN protein 3 (PFN3) (PFN3)                      | 45   | 69   | 69   | 12   | 11   | 48   | 63   | 27       | 2.33     | 0.000446 | 201  | 630  | 26   | 20   | 23   | 23   | 26   | 25   | 23   | 1.11 | 0.244366 | 23       | 1.14     | 0.260881 |          |          |
| 253726_at | Ak4g29430 | ribosomal protein S15a homolog ribon 40S ribosomal protein S15A (RPS15Ae)              | 188  | 199  | 226  | 246  | 269  | 227  | 204  | 248      | 0.83     | 0.060651 | 183  | 250  | 270  | 311  | 291  | 239  | 253  | 248  | 234  | 269  | 0.87     | 0.246500 | 281      | 0.84     | 0.240022 |          |
| 253727_at | Ak4g29350 | profilin 2 - supported by full-length cDN protein 2 (PRQ2) (PFN2) (PRF2)               | 1292 | 1495 | 1472 | 1706 | 1876 | 1593 | 1420 | 1725     | 0.82     | 0.042778 | 1584 | 1846 | 1642 | 2387 | 1964 | 1660 | 1789 | 1886 | 1630 | 1926 | 0.88     | 0.230026 | 204      | 0.84     | 0.236853 |          |
| 253728_at | Ak4g29410 | autative protein unknown protein chro 80S ribosomal protein L28 (RPL28C)               | 1979 | 2184 | 2227 | 2407 | 2361 | 2103 | 2130 | 2280     | 0.83     | 0.038816 | 2161 | 2329 | 2384 | 2961 | 2506 | 2198 | 2340 | 2368 | 2291 | 2481 | 0.92     | 0.833016 | 2655     | 0.90     | 0.318110 |          |
| 253729_at | Ak4g29580 | acid phosphatase-like protein beta-1, glycosyl hydrolase family 17 protein             | 214  | 224  | 236  | 289  | 294  | 223  | 225  | 265      | 0.85     | 0.131836 | 212  | 207  | 235  | 295  | 243  | 216  | 217  | 204  | 218  | 235  | 0.93     | 0.467833 | 252      | 0.87     | 0.241580 |          |
| 253730_at | Ak4g29480 | putative protein hypothetical protein T2 mitochondria ATP synthase q subunit fa        | 600  | 787  | 816  | 868  | 884  | 812  | 734  | 854      | 0.86     | 0.166855 | 780  | 918  | 887  | 1300 | 912  | 914  | 935  | 908  | 862  | 994  | 0.87     | 0.261289 | 1042     | 0.83     | 0.254282 |          |
| 253731_at | Ak4g29260 | acid phosphatase-like protein acid phc acid phosphatase class B family protein         | 328  | 388  | 451  | 497  | 502  | 475  | 389  | 491      | 0.79     | 0.047844 | 443  | 693  | 565  | 945  | 595  | 611  | 574  | 583  | 567  | 662  | 0.86     | 0.417122 | 717      | 0.79     | 0.238598 |          |
| 253704_at | Ak4g29500 | X-Pro dipeptidase - like protein (traam protidase-related                              | 317  | 416  | 468  | 500  | 627  | 462  | 400  | 530      | 0.76     | 0.124848 | 429  | 431  | 415  | 627  | 502  | 456  | 534  | 518  | 425  | 527  | 0.81     | 0.034092 | 528      | 0.80     | 0.131349 |          |
| 253673_at | Ak4g29530 | autative protein autative choschastase, 2,3-diketo-5-methylthio-1-phosphoacetat        | 78   | 107  | 104  | 103  | 114  | 92   | 96   | 103      | 0.53     | 0.555426 | 82   | 96   | 96   | 120  | 101  | 93   | 97   | 96   | 91   | 101  | 0.90     | 0.219795 | 105      | 0.87     | 0.228085 |          |
| 253674_at | Ak4g29540 | UDP-N-acetylglucosamine O-acetyltras bacterial transferase hexacoelid reeal            | 87   | 109  | 104  | 122  | 132  | 118  | 100  | 124      | 0.81     | 0.036806 | 98   | 104  | 113  | 154  | 119  | 119  | 114  | 105  | 123  | 0.85 | 0.153127 | 128      | 0.82     | 0.193468 |          |          |
| 253675_at | Ak4g29560 | hyvothetical protein : expressed protein                                               | 57   | 65   | 74   | 70   | 75   | 66   | 65   | 71       | 0.92     | 0.390867 | 42   | 39   | 53   | 47   | 44   | 49   | 46   | 52   | 44   | 47   | 0.94     | 0.441319 | 46       | 0.96     | 0.675433 |          |
| 253676_at | Ak4g29570 | cytidine deaminase - like protein cytidil cytidine deaminase, putative / cytidine a    | 14   | 14   | 13   | 14   | 13   | 23   | 14   | 17       | 0.82     | 0.393079 | 12   | 14   | 10   | 11   | 10   | 9    | 13   | 14   | 12   | 11   | 1.03     | 0.836729 | 10       | 1.17     | 0.234636 |          |
| 253677_at | Ak4g29580 | cytidine deaminase - like protein cytidil cytidine deaminase, putative / cytidine a    | 24   | 28   | 25   | 24   | 21   | 25   | 23   | 1.08     | 0.379696 | 23       | 26   | 28   | 24   | 21   | 23   | 21   | 24   | 26   | 22   | 1.15 | 0.079793 | 22       | 1.15     | 0.139367 |          |          |
| 253678_at | Ak4g29600 | cytidine deaminase 7                                                                   | 10   | 11   | 19   | 18   | 22   | 17   | 13   | 19       | 0.68     | 0.133449 | 11   | 10   | 12   | 8    | 13   | 9    | 13   | 14   | 11   | 11   | 0.97     | 0.830066 | 10       | 1.10     | 0.558401 |          |
| 253679_at | Ak4g29610 | cytidine deaminase 6 (CDA6)                                                            | 72   | 83   | 104  | 94   | 120  | 101  | 87   | 105      | 0.82     | 0.206518 | 131  | 157  | 127  | 144  | 118  | 135  | 150  | 136  | 138  | 137  | 1.01     | 0.853344 | 132      | 1.05     | 0.628698 |          |
| 253680_at | Ak4g29620 | cytidine deaminase 2 (CDA2)                                                            | 25   | 27   | 33   | 37   | 36   | 29   | 28   | 34       | 0.83     | 0.146880 | 24   | 23   | 26   | 27   | 30   | 30   | 29   | 24   | 24   | 28   | 0.87     | 0.065832 | 29       | 0.84     | 0.028239 |          |
| 253681_at | Ak4g29630 | cytidine deaminase 3 (CDA3)                                                            | 23   | 24   | 35   | 30   | 27   | 31   | 0.89 | 0.447137 | 19       | 22       | 30   | 23   | 21   | 25   | 30   | 27   | 23   | 25   | 30   | 0.93 | 0.608109 | 23       | 1.02     | 0.908602 |          |          |
| 253682_at | Ak4g29640 | cytidine deaminase 5 (CDA5)                                                            | 45   | 54   | 60   | 57   | 61   | 58   | 53   | 58       | 0.91     | 0.309528 | 56   | 61   | 69   | 61   | 60   | 47   | 59   | 57   | 62   | 55   | 1.13     | 0.176960 | 53       | 1.17     | 0.196447 |          |
| 253683_at | Ak4g29650 | cytidine deaminase 4 (CDA4)                                                            | 77   | 96   | 100  | 89   | 124  | 90   | 91   | 101      | 0.90     | 0.501549 | 85   | 92   | 99   | 98   | 75   | 80   | 107  | 93   | 92   | 91   | 1.02     | 0.846643 | 85       | 1.09     | 0.391613 |          |
| 253684_at | Ak4g29690 | nucleotide ovrochoshastase - like prot tve i choschodiesterase/nucleotide ovr          | 30   | 38   | 40   | 60   | 95   | 62   | 36   | 72       | 0.50     | 0.036441 | 7    | 13   | 16   | 55   | 44   | 41   | 33   | 33   | 14   | 41   | 0.33     | 0.002232 | 47       | 0.29     | 0.001638 |          |
| 253685_at | Ak4g29710 | autative protein nucleotide ovrochosh choschodiesterase/nucleotide ovrochosh           | 4    | 10   | 11   | 6    | 13   | 6    | 8    | 0.93     | 0.852633 | 1        | 7    | 8    | 11   | 6    | 7    | 7    | 17   | 6    | 8    | 9    | 0.95     | 0.890061 | 7        | 1.25     | 0.258409 |          |
| 253686_at | Ak4g29750 | autative protein predicted ovr expressed protein                                       | 74   | 129  | 109  | 156  | 108  | 104  | 138  | 0.81     | 0.211835 | 66       | 55   | 63   | 89   | 75   | 67   | 73   | 69   | 67   | 73   | 0.82 | 0.044651 | 78       | 0.89     | 0.084771 |          |          |
| 253687_at | Ak4g29590 | putative protein : supported by full-leng expressed protein                            | 231  | 253  | 239  | 336  | 322  | 278  | 241  | 312      | 0.77     | 0.118113 | 212  | 235  | 296  | 399  | 254  | 241  | 230  | 239  | 248  | 273  | 0.91     | 0.611033 | 298      | 0.83     | 0.426226 |          |
| 253688_at | Ak4g29590 | putative protein : supported by full-leng expressed protein                            | 167  | 218  | 207  | 240  | 256  | 209  | 197  | 235      | 0.84     | 0.143875 | 235  | 204  | 224  | 361  | 272  | 260  | 252  | 254  | 221  | 280  | 0.79     | 0.083741 | 298      | 0.74     | 0.083174 |          |
| 253689_at | Ak4g29770 | hyvothetical protein : supported by full-h expressed protein                           | 637  | 643  | 669  | 857  | 930  | 839  | 614  | 875      | 0.70     | 0.006839 | 616  | 694  | 726  | 1032 | 817  | 744  | 750  | 731  | 679  | 815  | 0.83     | 0.135109 | 804      | 0.79     | 0.115466 |          |
| 253690_at | Ak4g29650 | autative protein various predicted ovr expressed protein                               | 33   | 32   | 35   | 34   | 37   | 35   | 33   | 35       | 0.55     | 0.260738 | 32   | 27   | 34   | 30   | 28   | 27   | 30   | 28   | 27   | 31   | 0.88     | 0.113    | 0.79061  | 28       | 1.11     | 0.228038 |
| 253691_at | Ak4g29660 | autative protein predicted ovr expressed protein                                       | 242  | 352  | 373  | 382  | 460  | 374  | 323  | 405      | 0.80     | 0.166223 | 268  | 308  | 313  | 461  | 336  | 331  | 349  | 327  | 297  | 361  | 0.82     | 0.119347 | 376      | 0.79     | 0.151361 |          |
| 253692_at | Ak4g29720 | autative protein Ca protein, Drososchia amine oxidase family protein                   | 263  | 317  | 360  | 393  | 412  | 398  | 313  | 401      | 0.78     | 0.037309 | 163  | 150  | 220  | 279  | 213  | 193  | 218  | 205  | 178  | 230  | 0.77     | 0.084155 | 228      | 0.78     | 0.204758 |          |
| 253693_at | Ak4g29670 | Thioedoxin - like protein thioedoxin/Li thioedoxin family protein                      | 284  | 330  | 426  | 453  | 505  | 390  | 346  | 449      | 0.77     | 0.126172 | 357  | 398  | 322  | 460  | 406  | 391  | 439  | 429  | 359  | 425  | 0.84     | 0.026869 | 419      | 0.86     | 0.117156 |          |
| 253694_at | Ak4g29735 | Expressed protein : supported by full-leng expressed protein                           | 911  | 1193 | 1180 | 1263 | 1103 | 1095 | 1182 | 1095     | 0.82     | 0.456910 | 1092 | 1180 | 1147 | 1404 | 1191 | 1172 | 1261 | 1232 | 1140 | 1270 | 0.84     | 0.153456 | 1286     | 0.89     | 0.245406 |          |
| 253695_at | Ak4g29510 | arginine methyltransferase (carn5) : su protein arginine N-methyltransferase, pu       | 519  | 540  | 574  | 724  | 765  | 612  | 547  | 700      | 0.78     | 0.034469 | 589  | 606  | 605  | 902  | 674  | 666  | 696  | 633  | 600  | 714  | 0.84     | 0.125616 | 747      | 0.80     | 0.129788 |          |
| 253696_at | Ak4g29740 | autative protein - like protein cvtkoni FAD-binding domain-contains protein /          | 25   | 29   | 31   | 26   | 29   | 25   | 28   | 27       | 1.06     | 0.525846 | 24   | 24   | 29   | 27   | 25   | 23   | 31   | 26   | 26   | 27   | 0.96     | 0.686300 | 25       | 1.02     | 0.843415 |          |
| 253697_at | Ak4g29700 | nucleotide ovrochoshastase - like prot tve i choschodiesterase/nucleotide ovr          | 143  | 210  | 230  | 194  | 295  | 183  | 194  | 224      | 0.87     | 0.537666 | 122  | 107  | 122  | 173  | 185  | 171  | 215  | 222  | 117  | 193  | 0.60     | 0.002034 | 176      | 0.66     | 0.000868 |          |
| 253698_at | Ak4g29680 | nucleotide ovrochoshastase - like prot tve i choschodiesterase/nucleotide ovr          | 504  | 592  | 721  | 859  | 969  | 753  | 592  | 860      | 0.89     | 0.041713 | 481  | 553  | 532  | 932  | 722  | 636  | 693  | 682  | 505  | 733  | 0.89     | 0.017113 | 763      | 0.66     | 0.043909 |          |
| 253699_at | Ak4g29800 | autative protein psatin-like protein, So psatin-related                                | 41   | 64   | 60   | 60   | 60   | 60   | 60   | 60       | 0.63     | 0.307379 | 29   | 34   | 36   | 34   | 36   | 38   | 46   | 38   | 46   | 38   | 0.87     | 0.428242 | 33       | 0.95     | 0.745527 |          |
| 253700_at | Ak4g29840 | threonine synthase                                                                     | 457  | 539  | 538  | 609  | 468  | 495  | 538  | 92       | 0.92     | 0.418403 | 414  | 356  | 405  | 507  | 460  | 431  | 556  | 532  | 392  | 497  | 0.79     | 0.019685 | 466      | 0.84     | 0.061699 |          |
| 253701_at | Ak4g29890 | choline monoxygenase - like protein c choline monoxygenase, putative (CMO              | 202  | 314  | 357  | 320  | 398  | 272  | 291  | 330      | 1.08     | 0.547209 | 281  | 304  | 298  | 466  | 383  | 358  | 366  | 333  | 294  | 377  | 0.78     | 0.037055 | 396      | 0.74     | 0.047166 |          |
| 253702_at | Ak4g29900 | Ca2+-transporting ATPase - like protei calmo-transon ATPase, plasma m                  | 626  | 474  | 657  | 558  | 579  | 541  | 586  | 559      | 1.05     | 0.688166 | 545  | 466  | 488  | 567  | 467  | 483  | 541  | 590  | 632  | 500  | 544      | 0.92     | 0.407964 | 408      | 1.00     | 0.975528 |
| 253703_at | Ak4g29910 | autative protein orcin reeomtion complex subunit 5-als                                 | 162  | 189  | 210  | 242  | 107  | 162  | 187  | 229      | 0.69     | 0.040052 | 174  | 159  | 191  | 271  | 213  | 178  | 219  | 175  | 224  | 180  | 0.78     | 0.057970 | 221      | 0.79     | 0.040411 |          |

|             |          |                                                                                            |      |      |      |      |      |      |      |      |          |          |      |      |      |      |      |      |      |      |          |      |          |          |          |          |          |          |
|-------------|----------|--------------------------------------------------------------------------------------------|------|------|------|------|------|------|------|------|----------|----------|------|------|------|------|------|------|------|------|----------|------|----------|----------|----------|----------|----------|----------|
| 253628_at   | A4g30280 | xylofucan endo-1,4-beta-D-glucanase xylofucanase:xylofucosyl transferase, put              | 42   | 23   | 36   | 25   | 29   | 34   | 33   | 29   | 1.13     | 0.554725 | 16   | 21   | 22   | 18   | 15   | 17   | 25   | 17   | 20       | 18   | 1.07     | 0.636201 | 16       | 1.18     | 0.215178 |          |
| 253629_at   | A4g30450 | glycine-rich protein glycine-rich cell wall glycine-rich protein                           | 89   | 138  | 152  | 166  | 151  | 161  | 126  | 159  | 0.79     | 0.154278 | 121  | 103  | 149  | 177  | 145  | 145  | 160  | 166  | 125      | 159  | 0.79     | 0.037756 | 156      | 0.80     | 0.143837 |          |
| 253630_at   | A4g30490 | outative protein outative ATPase - Hae AF51-like ATPase family protein                     | 111  | 187  | 172  | 99   | 124  | 85   | 143  | 103  | 1.39     | 0.127437 | 134  | 128  | 114  | 169  | 122  | 109  | 172  | 163  | 125      | 147  | 0.85     | 0.278434 | 133      | 0.94     | 0.706347 |          |
| 253631_at   | A4g30540 | outative protein outative endonuclease-like protein NAD-dependent endonuclease/dehydratase | 601  | 419  | 670  | 462  | 790  | 607  | 556  | 670  | 0.87     | 0.333601 | 401  | 453  | 548  | 449  | 597  | 548  | 549  | 549  | 549      | 549  | 0.87     | 0.090441 | 452      | 0.97     | 0.102672 |          |
| 253632_at   | A4g30430 | sensence-associated protein homok sensence-associated family protein                       | 1219 | 845  | 1463 | 1234 | 1260 | 854  | 1189 | 1116 | 1.07     | 0.747485 | 764  | 897  | 754  | 720  | 880  | 562  | 715  | 645  | 805      | 644  | 1.25     | 0.026872 | 621      | 1.30     | 0.053444 |          |
| 253633_at   | A4g30480 | putative protein tetraetrapeptide repea tetraetrapeptide repeat (TPR)-containing           | 205  | 249  | 249  | 294  | 330  | 276  | 234  | 300  | 0.78     | 0.038762 | 260  | 290  | 307  | 427  | 397  | 315  | 341  | 315  | 286      | 359  | 0.79     | 0.060209 | 380      | 0.75     | 0.060610 |          |
| 253634_at   | A4g30590 | putative protein ENOD20 gene product plastocyanin-like domain-containing prot              | 222  | 635  | 756  | 50   | 61   | 58   | 705  | 56   | 12.58    | 0.000057 | 451  | 582  | 468  | 43   | 35   | 45   | 42   | 38   | 500      | 41   | 12.29    | 0.000005 | 41       | 12.15    | 0.000369 |          |
| 253635_at   | A4g30620 | putative protein hypothetical protein                                                      | 140  | 169  | 209  | 156  | 156  | 140  | 169  | 209  | 1.06     | 0.771416 | 212  | 239  | 181  | 221  | 259  | 221  | 224  | 132  | 0929     | 233  | 0.94     | 0.103029 | 233      | 0.93     | 0.142055 |          |
| 253636_at   | A4g30500 | outative protein predicted protein, AraC expressed protein                                 | 186  | 248  | 275  | 279  | 300  | 221  | 236  | 267  | 0.88     | 0.435614 | 234  | 238  | 293  | 387  | 302  | 329  | 241  | 231  | 255      | 298  | 0.86     | 0.336248 | 339      | 0.75     | 0.055820 |          |
| 253637_at   | A4g30390 | outative protein : supported by full-length expressed protein                              | 133  | 175  | 183  | 191  | 189  | 158  | 163  | 180  | 0.91     | 0.439280 | 198  | 207  | 201  | 266  | 205  | 204  | 228  | 202  | 202      | 221  | 0.91     | 0.282504 | 225      | 0.90     | 0.324954 |          |
| 253638_at   | A4g30470 | cinnamoyl-CoA reductase - like protein cinnamoyl-CoA reductase-related                     | 173  | 288  | 298  | 173  | 152  | 120  | 148  | 149  | 0.165059 | 498      | 485  | 455  | 365  | 275  | 267  | 332  | 318  | 479  | 312      | 1.54 | 0.000657 | 302      | 1.58     | 0.000405 |          |          |
| 253639_at   | A4g30550 | outative protein component of aniline c glutamine amidotransferase class-I dom             | 309  | 374  | 454  | 408  | 407  | 335  | 379  | 383  | 0.89     | 0.333601 | 403  | 437  | 409  | 589  | 476  | 449  | 457  | 456  | 417      | 485  | 0.86     | 0.103721 | 505      | 0.83     | 0.117119 |          |
| 253640_at   | A4g30630 | putative protein - supported by full-length expressed protein                              | 196  | 273  | 298  | 300  | 355  | 244  | 253  | 300  | 0.84     | 0.333601 | 240  | 223  | 250  | 340  | 292  | 274  | 271  | 259  | 238      | 287  | 0.83     | 0.047653 | 302      | 0.79     | 0.039181 |          |
| 253606_at   | A4g30530 | putative protein component of aniline c defense-related protein, putative                  | 452  | 438  | 447  | 846  | 813  | 629  | 446  | 763  | 0.58     | 0.009391 | 501  | 450  | 559  | 914  | 761  | 718  | 677  | 686  | 504      | 751  | 0.67     | 0.007267 | 798      | 0.63     | 0.012041 |          |
| 253607_at   | A4g30330 | small nuclear ribonucleoprotein homok small nuclear ribonucleoprotein (E, putati           | 400  | 400  | 465  | 472  | 506  | 456  | 388  | 478  | 0.81     | 0.147221 | 261  | 307  | 350  | 500  | 519  | 312  | 387  | 385  | 306      | 385  | 0.79     | 0.139267 | 384      | 0.80     | 0.286776 |          |
| 253608_at   | A4g30290 | xylofucan endo-1,4-beta-D-glucanase xylofucanase:xylofucosyl transferase, out              | 34   | 54   | 38   | 43   | 58   | 42   | 37   | 47   | 0.78     | 0.117717 | 74   | 90   | 63   | 68   | 55   | 53   | 76   | 74   | 76       | 65   | 1.16     | 0.258407 | 59       | 1.30     | 0.132394 |          |
| 253609_at   | A4g30340 | outative protein diacylglycerol kinase II diacylglycerol kinase family protein             | 98   | 112  | 120  | 166  | 153  | 155  | 110  | 168  | 0.65     | 0.004792 | 88   | 115  | 122  | 200  | 160  | 127  | 129  | 129  | 108      | 149  | 0.73     | 0.092907 | 162      | 0.67     | 0.082136 |          |
| 253579_at   | A4g30610 | SERINE CARBOXYPEPTIDASE II-like serine carboxypeptidase S10 family prot                    | 584  | 594  | 599  | 358  | 345  | 276  | 592  | 326  | 1.82     | 0.000504 | 182  | 190  | 225  | 233  | 184  | 174  | 190  | 184  | 199      | 193  | 1.03     | 0.733632 | 197      | 1.01     | 0.938189 |          |
| 253580_at   | A4g30400 | putative protein HSP-H2 finger protein zinc finger (C3HC4-type RING finger) fa             | 176  | 204  | 211  | 222  | 254  | 205  | 197  | 227  | 0.87     | 0.167093 | 267  | 241  | 261  | 328  | 271  | 218  | 305  | 289  | 256      | 282  | 0.91     | 0.346095 | 273      | 0.94     | 0.644926 |          |
| 253581_at   | A4g30660 | fa stress responsive protein homokoz loo stress responsive protein homokoz loo i           | 370  | 467  | 561  | 440  | 872  | 535  | 466  | 615  | 0.76     | 0.352211 | 406  | 436  | 348  | 394  | 361  | 448  | 518  | 519  | 397      | 448  | 0.89     | 0.312411 | 401      | 0.99     | 0.912486 |          |
| 253582_at   | A4g30670 | Expressed protein - supported by cDNA expressed protein                                    | 34   | 34   | 39   | 43   | 44   | 38   | 35   | 42   | 0.85     | 0.059494 | 29   | 34   | 31   | 29   | 28   | 29   | 29   | 1.07 | 0.183359 | 28   | 1.10     | 0.114584 |          |          |          |          |
| 253583_at   | A4g30680 | translation initiation factor-like protein I MA3 domain-containing protein                 | 41   | 55   | 60   | 51   | 56   | 51   | 52   | 53   | 0.99     | 0.951356 | 54   | 68   | 59   | 84   | 61   | 59   | 63   | 65   | 61       | 66   | 0.91     | 0.429878 | 68       | 0.89     | 0.463086 |          |
| 253584_at   | A4g30700 | outative protein several-hydroxyl on pentanucleotide (PPR) repeat-containi                 | 43   | 53   | 49   | 56   | 63   | 54   | 48   | 58   | 0.83     | 0.070543 | 39   | 32   | 36   | 44   | 38   | 33   | 40   | 36   | 39       | 0.90 | 0.229555 | 38       | 0.93     | 0.504714 |          |          |
| 253585_at   | A4g30720 | outative protein hypothetical protein - 5 expressed protein                                | 238  | 343  | 345  | 288  | 328  | 257  | 309  | 291  | 1.06     | 0.682854 | 174  | 198  | 232  | 261  | 186  | 188  | 263  | 255  | 201      | 230  | 0.87     | 0.317413 | 211      | 0.95     | 0.748518 |          |
| 253586_s_at | A4g30740 | putative protein hypothetical protein T2 expressed protein                                 | 37   | 50   | 48   | 68   | 67   | 54   | 45   | 63   | 0.72     | 0.044263 | 19   | 22   | 20   | 31   | 15   | 21   | 25   | 27   | 20       | 24   | 0.85     | 0.379483 | 23       | 0.90     | 0.664556 |          |
| 253587_at   | A4g30770 | hypothetical protein                                                                       | 18   | 21   | 24   | 18   | 19   | 24   | 21   | 20   | 1.03     | 0.086939 | 16   | 18   | 18   | 22   | 14   | 14   | 18   | 21   | 21       | 17   | 18       | 0.94     | 0.688546 | 17       | 1.04     | 0.806972 |
| 253588_at   | A4g30790 | putative protein                                                                           | 215  | 312  | 309  | 306  | 390  | 253  | 279  | 316  | 0.88     | 0.501106 | 220  | 189  | 208  | 238  | 248  | 214  | 238  | 233  | 206      | 234  | 0.88     | 0.028350 | 233      | 0.88     | 0.108449 |          |
| 253589_at   | A4g30825 | outative protein membrane-associated pentanucleotide (PPR) repeat-containi                 | 252  | 74   | 83   | 88   | 99   | 81   | 70   | 89   | 0.78     | 0.131805 | 53   | 64   | 62   | 76   | 59   | 57   | 76   | 61   | 60       | 66   | 0.91     | 0.359955 | 64       | 0.94     | 0.578492 |          |
| 253590_at   | A4g30850 | outative protein various predicted protein                                                 | 209  | 217  | 242  | 247  | 273  | 211  | 223  | 244  | 0.91     | 0.363290 | 152  | 145  | 161  | 250  | 175  | 175  | 196  | 171  | 153      | 194  | 0.79     | 0.088632 | 200      | 0.76     | 0.135338 |          |
| 253591_at   | A4g30870 | outative protein hypothetical protein S repeat endonuclease family protein                 | 93   | 109  | 112  | 130  | 117  | 90   | 112  | 153  | 0.71     | 0.073245 | 88   | 129  | 133  | 155  | 123  | 115  | 154  | 154  | 137      | 154  | 0.84     | 0.254513 | 146      | 0.79     | 0.133291 |          |
| 253592_at   | A4g30840 | hypothetical protein - supported by full-l WD-40 repeat protein family                     | 153  | 187  | 191  | 177  | 204  | 176  | 177  | 186  | 0.95     | 0.528282 | 155  | 192  | 177  | 241  | 180  | 172  | 182  | 185  | 175      | 192  | 0.91     | 0.385698 | 198      | 0.88     | 0.396493 |          |
| 253593_at   | A4g30760 | putative protein hypothetical protein Fc expressed protein                                 | 767  | 1143 | 1313 | 961  | 1390 | 1061 | 1074 | 1138 | 0.94     | 0.774513 | 1094 | 1385 | 1131 | 1794 | 1321 | 1320 | 1453 | 1329 | 1203     | 1443 | 0.83     | 0.133915 | 1478     | 0.81     | 0.205712 |          |
| 253594_at   | A4g30820 | Expressed protein : supported by full-length dependent kinase-activating kinas             | 227  | 333  | 325  | 327  | 380  | 331  | 295  | 346  | 0.85     | 0.251620 | 292  | 320  | 353  | 490  | 350  | 318  | 335  | 326  | 322      | 364  | 0.88     | 0.383152 | 368      | 0.83     | 0.313983 |          |
| 253595_at   | A4g30830 | outative protein N1 protein, Streptococcus expressed protein                               | 9    | 11   | 11   | 11   | 13   | 10   | 10   | 11   | 0.90     | 0.411643 | 13   | 17   | 15   | 12   | 8    | 11   | 11   | 10   | 14       | 10   | 1.44     | 0.01406  | 10       | 1.40     | 0.051664 |          |
| 253596_s_at | A4g30750 | hypothetical protein - supported by cDNA hypothetical protein /// expressed protein        | 288  | 361  | 414  | 384  | 395  | 321  | 354  | 366  | 0.97     | 0.793098 | 338  | 385  | 375  | 529  | 432  | 375  | 438  | 407  | 366      | 436  | 0.84     | 0.097894 | 454      | 0.82     | 0.167482 |          |
| 253597_at   | A4g30690 | outative protein translation initiation fac translation initiation factor 3 (IF-3) familv  | 253  | 274  | 261  | 218  | 258  | 166  | 231  | 200  | 1.15     | 0.548328 | 238  | 258  | 211  | 276  | 241  | 236  | 262  | 257  | 232      | 254  | 0.91     | 0.158652 | 251      | 0.92     | 0.363879 |          |
| 253598_at   | A4g30800 | ribosomal protein S11 - like ribosomal 40S ribosomal protein S11 (RP511B)                  | 696  | 782  | 760  | 907  | 985  | 825  | 746  | 906  | 0.82     | 0.039180 | 743  | 824  | 826  | 1165 | 951  | 831  | 837  | 802  | 798      | 917  | 0.87     | 0.235986 | 982      | 0.81     | 0.143271 |          |
| 253599_at   | A4g30810 | putative protein S11 protein, Drosophila SET domain-containing protein                     | 143  | 177  | 161  | 168  | 177  | 152  | 145  | 169  | 0.93     | 0.444871 | 121  | 152  | 141  | 162  | 139  | 135  | 126  | 125  | 145      | 154  | 0.87     | 0.054571 | 150      | 0.88     | 0.231398 |          |
| 253600_at   | A4g30810 | SERINE CARBOXYPEPTIDASE II - like serine carboxypeptidase S10 family prot                  | 408  | 528  | 447  | 717  | 848  | 673  | 461  | 746  | 0.62     | 0.010829 | 390  | 340  | 387  | 677  | 558  | 501  | 574  | 566  | 375      | 575  | 0.65     | 0.002257 | 579      | 0.65     | 0.019222 |          |
| 253601_at   | A4g30900 | hypothetical protein                                                                       | 143  | 192  | 172  | 175  | 212  | 171  | 169  | 186  | 0.91     | 0.424869 | 164  | 165  | 210  | 247  | 196  | 175  | 211  | 208  | 180      | 207  | 0.87     | 0.197338 | 206      | 0.87     | 0.369906 |          |
| 253602_s_at | A4g30910 | leucyl aminocyclitase - like protein leu, cytolosl aminocyclitase familv protein ///       | 423  | 554  | 655  | 566  | 636  | 549  | 544  | 583  | 0.93     | 0.613466 | 252  | 240  | 276  | 293  | 255  | 216  | 333  | 316  | 256      | 282  | 0.91     | 0.398560 | 255      | 1.01     | 0.955066 |          |
| 253603_at   | A4g30935 | outative protein SPB binding protein, C WRKY family transcription factor                   | 257  | 253  | 283  | 292  | 319  | 260  | 236  | 280  | 0.81     | 0.104911 | 240  | 268  | 258  | 363  | 281  | 274  | 261  | 255  | 286      | 289  | 0.89     | 0.299320 | 298      | 0.86     | 0.276923 |          |
| 253604_at   | A4g30970 | hypothetical protein                                                                       | 54   | 63   | 107  | 85   | 85   | 85   | 86   | 86   | 0.467475 | 52       | 52   | 50   | 54   | 56   | 50   | 54   | 56   | 50   | 54       | 56   | 0.91     | 0.471561 | 51       | 0.91     | 0.058519 |          |
| 253605_at   | A4g30990 | putative protein probab membrane p expressed protein                                       | 99   | 135  | 127  | 140  | 184  | 117  | 120  | 147  | 0.82     | 0.301129 | 67   | 52   | 55   | 76   | 75   | 70   | 69   | 64   | 58       | 71   | 0.82     | 0.025624 | 74       | 0.79     | 0.031007 |          |
| 253571_at   | A4g31000 | putative calmodulin-binding protein cal calmodulin-binding protein                         | 217  | 64   | 84   | 55   | 59   | 53   | 78   | 56   | 1.41     | 0.034078 | 46   | 36   | 45   | 53   | 45   | 35   | 53   | 47   | 42       | 46   | 0.91     | 0.463907 | 44       | 0.96     | 0.813936 |          |
| 253572_at   | A4g31010 | hypothetical protein                                                                       | 87   | 279  | 290  | 289  | 296  | 294  | 262  | 293  | 0.89     | 0.247247 | 266  | 315  | 287  | 359  | 260  | 281  | 304  | 309  | 289      | 303  | 0.95     | 0.599592 | 300      | 0.96     | 0.754151 |          |
| 253573_at   | A4g31020 | putative protein BEM46 PROTEIN, Sac expressed protein                                      | 111  | 161  | 157  | 125  | 149  | 105  | 143  | 126  | 1.13     | 0.097345 | 141  | 133  | 147  | 165  | 150  | 134  | 125  | 140  | 139      | 150  | 1.04     | 0.880123 | 145      | 0.94     | 0.414369 |          |
| 253574_at   | A4g31030 | putative protein                                                                           | 446  |      |      |      |      |      |      |      |          |          |      |      |      |      |      |      |      |      |          |      |          |          |          |          |          |          |

|           |           |                                                                                                                                     |      |      |      |      |      |      |      |      |      |          |      |      |      |      |      |      |      |      |      |      |      |          |      |      |          |
|-----------|-----------|-------------------------------------------------------------------------------------------------------------------------------------|------|------|------|------|------|------|------|------|------|----------|------|------|------|------|------|------|------|------|------|------|------|----------|------|------|----------|
| 253534_at | A04g31500 | cytochrome P450 monooxygenase -su cytochrome P450 83B1 (CYP83B1)                                                                    | 162  | 95   | 160  | 60   | 76   | 78   | 139  | 71   | 1.96 | 0.043426 | 56   | 63   | 69   | 45   | 80   | 75   | 94   | 98   | 63   | 78   | 0.80 | 0.263720 | 67   | 0.94 | 0.744752 |
| 253535_at | A04g31550 | putative DNA-binding protein DNA-binding WRKY family transcription factor                                                           | 214  | 201  | 292  | 204  | 250  | 178  | 236  | 210  | 1.12 | 0.051956 | 245  | 278  | 251  | 349  | 260  | 270  | 388  | 358  | 258  | 325  | 0.79 | 0.101003 | 293  | 0.88 | 0.306013 |
| 253536_at | A04g31580 | RSZo22 serine/threonine kinase -su cytochrome P450 83B1 (CYP83B1)                                                                   | 737  | 737  | 763  | 993  | 1024 | 913  | 738  | 976  | 0.75 | 0.020963 | 852  | 1013 | 865  | 1279 | 962  | 971  | 983  | 949  | 910  | 1029 | 0.88 | 0.243274 | 1071 | 0.85 | 0.239542 |
| 253537_at | A04g31590 | putative protein -su cytochrome P450 83B1 (CYP83B1)                                                                                 | 132  | 132  | 132  | 132  | 132  | 118  | 117  | 127  | 0.82 | 0.038977 | 118  | 127  | 118  | 127  | 118  | 127  | 118  | 127  | 118  | 127  | 0.82 | 0.038977 | 118  | 0.75 | 0.239542 |
| 253538_at | A04g31600 | putative protein -su cytochrome P450 83B1 (CYP83B1)                                                                                 | 295  | 306  | 405  | 442  | 470  | 411  | 365  | 441  | 0.83 | 0.124744 | 306  | 426  | 386  | 528  | 379  | 367  | 378  | 390  | 371  | 408  | 0.91 | 0.465242 | 425  | 0.87 | 0.444535 |
| 253539_at | A04g31450 | putative protein RING-finger protein - L zinc finger (C3HC4-type RING finger) fa                                                    | 93   | 132  | 137  | 143  | 143  | 120  | 121  | 135  | 0.89 | 0.408396 | 112  | 135  | 130  | 151  | 135  | 128  | 153  | 141  | 126  | 142  | 0.89 | 0.101538 | 138  | 0.91 | 0.281014 |
| 253540_at | A04g31620 | putative protein various predicted protein transcriptional factor B3 family protein                                                 | 25   | 23   | 29   | 26   | 33   | 29   | 26   | 29   | 0.88 | 0.214567 | 30   | 26   | 32   | 28   | 30   | 34   | 40   | 30   | 29   | 32   | 0.91 | 0.414101 | 31   | 0.96 | 0.687337 |
| 253541_at | A04g31630 | putative protein various predicted protein transcriptional factor B3 family protein                                                 | 24   | 24   | 24   | 24   | 24   | 24   | 24   | 24   | 1.13 | 0.040398 | 25   | 24   | 23   | 24   | 24   | 24   | 24   | 24   | 24   | 24   | 1.44 | 0.231663 | 15   | 1.52 | 0.099987 |
| 253542_at | A04g31670 | putative protein deubiquitinating enzyme ubiquitin carboxyl-terminal hydrolase fa                                                   | 101  | 123  | 115  | 154  | 165  | 137  | 113  | 152  | 0.75 | 0.021474 | 117  | 106  | 117  | 165  | 150  | 123  | 157  | 150  | 113  | 149  | 0.76 | 0.101799 | 146  | 0.78 | 0.063598 |
| 253543_at | A04g31680 | putative protein various predicted protein transcriptional factor B3 family protein                                                 | 12   | 11   | 13   | 12   | 12   | 11   | 12   | 11   | 1.04 | 0.039155 | 10   | 13   | 11   | 10   | 15   | 14   | 13   | 11   | 13   | 11   | 0.85 | 0.163511 | 13   | 0.85 | 0.300149 |
| 253544_at | A04g31710 | putative protein kainate receptor. Ratt. glutamate receptor family protein (GLR2)                                                   | 47   | 53   | 71   | 56   | 65   | 57   | 57   | 60   | 0.96 | 0.753293 | 36   | 26   | 38   | 36   | 27   | 29   | 41   | 37   | 33   | 34   | 0.99 | 0.920248 | 30   | 1.10 | 0.560893 |
| 253545_at | A04g31720 | putative protein SV1 protein. rat. PIR2                                                                                             | 24   | 33   | 44   | 46   | 42   | 39   | 34   | 40   | 0.96 | 0.229229 | 30   | 23   | 29   | 34   | 37   | 33   | 39   | 34   | 37   | 35   | 0.77 | 0.010631 | 34   | 0.79 | 0.036325 |
| 253546_at | A04g31740 | putative protein SV1 protein. rat. PIR2                                                                                             | 29   | 24   | 29   | 26   | 31   | 34   | 27   | 30   | 0.90 | 0.319891 | 30   | 23   | 35   | 23   | 25   | 30   | 30   | 31   | 29   | 28   | 1.06 | 0.612089 | 26   | 1.14 | 0.417804 |
| 253547_at | A04g31750 | putative protein protein phosphatase 2, protein phosphatase 2C, putative / PP2C                                                     | 147  | 200  | 214  | 225  | 241  | 190  | 187  | 219  | 0.85 | 0.274198 | 200  | 206  | 224  | 275  | 206  | 195  | 215  | 214  | 210  | 221  | 0.95 | 0.592725 | 226  | 0.93 | 0.586499 |
| 253548_at | A04g31760 | peroxidase - like protein peroxidase 2, peroxidase, putative                                                                        | 37   | 49   | 46   | 41   | 46   | 41   | 44   | 43   | 1.03 | 0.783264 | 40   | 48   | 49   | 35   | 31   | 33   | 37   | 37   | 46   | 35   | 1.32 | 0.004851 | 33   | 1.38 | 0.015033 |
| 253549_at | A04g31805 | putative protein DNA-binding protein A WRKY family transcription factor                                                             | 16   | 29   | 20   | 16   | 20   | 19   | 22   | 18   | 1.18 | 0.444419 | 11   | 14   | 15   | 14   | 15   | 13   | 13   | 13   | 13   | 13   | 1.00 | 0.977165 | 13   | 0.99 | 0.964502 |
| 253550_at | A04g31810 | Transcription factor II homolog - su transcription initiation factor IID (TFIID) 1                                                  | 841  | 894  | 889  | 831  | 953  | 739  | 808  | 841  | 0.96 | 0.787508 | 775  | 891  | 834  | 1106 | 824  | 839  | 891  | 870  | 830  | 906  | 0.92 | 0.334696 | 923  | 0.90 | 0.391642 |
| 253551_at | A04g31800 | Expressed protein - su cytochrome P450 83B1 (CYP83B1)                                                                               | 196  | 147  | 214  | 443  | 509  | 469  | 186  | 474  | 0.39 | 0.000467 | 191  | 174  | 155  | 316  | 327  | 282  | 347  | 346  | 173  | 324  | 0.54 | 0.000137 | 308  | 0.56 | 0.001331 |
| 253552_at | A04g31800 | putative protein KIAA0260 gene, huma UDP-glucuronide UDP-N-acetylglucosamine 6S - like ribosomal p 40S ribosomal protein S6 (RP56A) | 200  | 230  | 206  | 298  | 343  | 238  | 212  | 293  | 0.72 | 0.064671 | 180  | 156  | 184  | 283  | 238  | 227  | 245  | 227  | 173  | 244  | 0.71 | 0.003545 | 249  | 0.70 | 0.016867 |
| 253553_at | A04g31700 | putative protein reductase meristem transcriptional factor B3 family protein                                                        | 3096 | 3436 | 3361 | 3677 | 3732 | 3398 | 3298 | 3603 | 0.92 | 0.165201 | 3167 | 3503 | 3510 | 4236 | 3514 | 3069 | 3455 | 3424 | 3393 | 3539 | 0.96 | 0.604892 | 3606 | 0.94 | 0.584686 |
| 253554_at | A04g31610 | putative protein P450-like protein cytochrome P450, putative                                                                        | 211  | 248  | 182  | 332  | 455  | 330  | 197  | 372  | 0.53 | 0.023268 | 119  | 114  | 107  | 214  | 165  | 154  | 137  | 121  | 113  | 154  | 0.73 | 0.115385 | 171  | 0.66 | 0.070072 |
| 253555_at | A04g31780 | monoacylglycerol acyltransferase 12 - diacylglycerol 3-beta-acyltransferase                                                         | 235  | 349  | 389  | 388  | 424  | 332  | 324  | 381  | 0.85 | 0.343784 | 323  | 304  | 321  | 467  | 369  | 348  | 391  | 383  | 316  | 392  | 0.81 | 0.032375 | 395  | 0.80 | 0.104119 |
| 253556_at | A04g31790 | methyltransferase - like protein methyl diphosphate synthase, putative (DPH5)                                                       | 154  | 183  | 180  | 222  | 228  | 192  | 172  | 214  | 0.80 | 0.045687 | 150  | 191  | 185  | 301  | 220  | 220  | 240  | 214  | 175  | 239  | 0.73 | 0.035415 | 247  | 0.71 | 0.075045 |
| 253557_at | A04g31770 | RNA larial debranching enzyme - like i calnexin-like chaperoninase family                                                           | 100  | 115  | 115  | 135  | 144  | 119  | 110  | 133  | 0.83 | 0.060371 | 96   | 94   | 115  | 144  | 116  | 108  | 117  | 107  | 102  | 118  | 0.86 | 0.156813 | 123  | 0.83 | 0.181986 |
| 253558_at | A04g31780 | enoyl-CoA hydratase - like protein eno enoyl-CoA hydratase/isomerase family s                                                       | 308  | 403  | 370  | 429  | 466  | 408  | 363  | 435  | 0.84 | 0.098718 | 349  | 421  | 383  | 487  | 409  | 370  | 388  | 353  | 351  | 401  | 0.88 | 0.197038 | 422  | 0.83 | 0.141104 |
| 253559_at | A04g31720 | putative protein various predicted protein photoreceptor-responsive NPH3 family pr                                                  | 664  | 806  | 1042 | 608  | 829  | 492  | 867  | 643  | 1.35 | 0.204160 | 215  | 248  | 208  | 280  | 211  | 192  | 255  | 265  | 224  | 237  | 0.94 | 0.598200 | 221  | 0.91 | 0.920506 |
| 253560_at | A04g31830 | putative protein expressed protein                                                                                                  | 13   | 16   | 21   | 62   | 22   | 17   | 17   | 34   | 0.49 | 0.299014 | 12   | 16   | 15   | 18   | 23   | 14   | 21   | 16   | 16   | 16   | 0.85 | 0.282526 | 18   | 0.85 | 0.384137 |
| 253561_at | A04g31850 | putative protein crf1 protein. Zea mays entactinocytide (PPR) repeat-containi                                                       | 60   | 91   | 83   | 80   | 89   | 61   | 78   | 77   | 1.02 | 0.930202 | 65   | 68   | 66   | 76   | 65   | 52   | 78   | 67   | 62   | 67   | 0.92 | 0.443078 | 64   | 0.97 | 0.808052 |
| 253562_at | A04g31870 | glutathione peroxidase - like protein di glutathione peroxidase, putative                                                           | 34   | 34   | 32   | 28   | 35   | 32   | 32   | 32   | 0.99 | 0.874890 | 26   | 21   | 35   | 27   | 23   | 27   | 30   | 31   | 27   | 28   | 1.00 | 0.970072 | 25   | 1.08 | 0.663178 |
| 253563_at | A04g31880 | putative protein microtubule-associated protein                                                                                     | 456  | 612  | 541  | 691  | 614  | 536  | 624  | 624  | 0.85 | 0.038977 | 451  | 35   | 467  | 435  | 467  | 418  | 465  | 475  | 435  | 495  | 0.86 | 0.354187 | 495  | 0.88 | 0.420802 |
| 253564_at | A04g31890 | putative protein various predicted protein glutathione-beta-catenin repeat famil prot                                               | 39   | 59   | 51   | 64   | 71   | 65   | 50   | 66   | 0.75 | 0.058686 | 41   | 45   | 43   | 56   | 48   | 43   | 46   | 40   | 43   | 47   | 0.92 | 0.359661 | 49   | 0.87 | 0.195683 |
| 253565_at | A04g31900 | putative protein zinc-finger helixase, H chromatin remodeling factor, putative                                                      | 33   | 38   | 39   | 37   | 36   | 31   | 37   | 35   | 1.05 | 0.534606 | 37   | 36   | 42   | 31   | 38   | 41   | 38   | 38   | 41   | 38   | 1.02 | 0.803668 | 36   | 1.06 | 0.598390 |
| 253566_at | A04g31920 | predicted protein ReaA gene. Dictyostelium two-component responsive regulator fan                                                   | 112  | 138  | 151  | 204  | 202  | 181  | 134  | 196  | 0.88 | 0.010395 | 84   | 79   | 103  | 153  | 129  | 103  | 124  | 120  | 89   | 126  | 0.71 | 0.021353 | 128  | 0.69 | 0.070011 |
| 253567_at | A04g32010 | predicted protein predicted protein on E transcriptional factor B3 family protein                                                   | 127  | 100  | 177  | 172  | 226  | 149  | 155  | 182  | 0.85 | 0.362478 | 121  | 98   | 113  | 150  | 143  | 107  | 131  | 133  | 110  | 133  | 0.83 | 0.085739 | 133  | 0.83 | 0.199226 |
| 253568_at | A04g31940 | Cytochrome P450-like protein cytochrome P450, putative                                                                              | 6    | 6    | 5    | 9    | 6    | 3    | 5    | 6    | 0.89 | 0.713602 | 2    | 7    | 5    | 5    | 5    | 5    | 5    | 5    | 5    | 5    | 0.77 | 0.471647 | 5    | 0.90 | 0.751763 |
| 253569_at | A04g31950 | cytochrome P450-like protein cytochrome P450, putative                                                                              | 7    | 7    | 9    | 7    | 10   | 11   | 8    | 9    | 0.84 | 0.346146 | 7    | 5    | 6    | 6    | 6    | 6    | 6    | 6    | 6    | 6    | 1.00 | 0.984588 | 5    | 1.19 | 0.461481 |
| 253570_at | A04g31960 | hypothetical protein                                                                                                                | 18   | 13   | 17   | 20   | 20   | 18   | 16   | 19   | 0.83 | 0.122233 | 16   | 15   | 21   | 16   | 18   | 15   | 24   | 25   | 17   | 19   | 0.88 | 0.453712 | 16   | 1.05 | 0.686125 |
| 253571_at | A04g31970 | cytochrome P450-like protein flavonoid cytochrome P450, putative                                                                    | 9    | 11   | 9    | 11   | 12   | 9    | 11   | 12   | 0.87 | 0.329260 | 7    | 11   | 9    | 9    | 9    | 9    | 9    | 9    | 9    | 9    | 1.11 | 0.535551 | 9    | 1.21 | 0.410187 |
| 253572_at | A04g31980 | putative protein EREBP-A homolog, Ar expressed protein                                                                              | 97   | 112  | 132  | 115  | 138  | 105  | 114  | 119  | 0.96 | 0.725682 | 100  | 97   | 95   | 125  | 96   | 103  | 142  | 133  | 97   | 120  | 0.81 | 0.109141 | 108  | 0.90 | 0.307722 |
| 253573_at | A04g32000 | serine threonine protein kinase like cdc protein kinase family protein                                                              | 27   | 33   | 33   | 40   | 40   | 35   | 33   | 39   | 0.87 | 0.266147 | 26   | 21   | 33   | 29   | 25   | 23   | 34   | 26   | 27   | 27   | 0.98 | 0.896794 | 26   | 1.05 | 0.773029 |
| 253574_at | A04g31840 | putative protein ENO1D6. Medicago in plastocyanin-like domain-containing prot                                                       | 2426 | 2801 | 2384 | 2812 | 3243 | 2600 | 2537 | 2885 | 0.80 | 0.026223 | 2301 | 2075 | 2421 | 2884 | 2718 | 2337 | 2327 | 2376 | 2266 | 2528 | 0.90 | 0.172686 | 2646 | 0.86 | 0.117116 |
| 253575_at | A04g31990 | ascorbate aminotransferase - su cytochrome P450 83B1 (CYP83B1)                                                                      | 463  | 609  | 673  | 750  | 610  | 561  | 678  | 583  | 0.83 | 0.142787 | 642  | 684  | 695  | 1014 | 826  | 689  | 625  | 755  | 667  | 822  | 0.81 | 0.080552 | 843  | 0.79 | 0.140247 |
| 253576_at | A04g31980 | Expressed protein - supported by cDNA RUS ribosomal protein L30 (RP_L30A) //                                                        | 1439 | 1715 | 1583 | 1825 | 1603 | 1579 | 1803 | 1693 | 0.83 | 0.038977 | 1487 | 1583 | 1693 | 1825 | 1693 | 1825 | 1693 | 1825 | 1693 | 1825 | 0.83 | 0.038977 | 1487 | 0.86 | 0.140247 |
| 253577_at | A04g31910 | putative protein anthranilate N-hydroxy transferase family protein                                                                  | 41   | 50   | 39   | 79   | 74   | 65   | 43   | 73   | 0.59 | 0.004645 | 55   | 52   | 48   | 161  | 108  | 94   | 91   | 95   | 52   | 110  | 0.47 | 0.016185 | 121  | 0.43 | 0.028065 |
| 253578_at | A04g31930 | hypothetical protein - supported by cDNA mitochondrial glyoxylate family protein                                                    | 114  | 137  | 154  | 165  | 176  | 143  | 135  | 161  | 0.84 | 0.152769 | 147  | 147  | 154  | 216  | 178  | 178  | 168  | 158  | 147  | 149  | 0.86 | 0.180742 | 187  | 0.80 | 0.061140 |
| 253579_at | A04g31860 | protein phosphatase 2C - like protein c protein phosphatase 2C, putative / PP2C                                                     | 172  | 244  | 256  | 268  | 282  | 217  | 234  | 256  | 0.88 | 0.350865 | 314  | 316  | 344  | 478  | 402  | 375  | 395  | 378  | 325  | 406  | 0.80 | 0.021239 | 418  | 0.78 | 0.044941 |
| 253580_at | A04g31870 | Expressed protein - supported by cDNA expressed protein                                                                             | 31   | 32   | 31   | 37   | 31   | 32   | 31   | 32   | 0.90 | 0.235693 | 36   | 34   | 39   | 38   | 33   | 38   | 40   | 38   | 43   | 35   | 1.08 | 0.438601 | 36   |      |          |

|           |          |                                                                                    |     |     |     |     |     |     |     |      |          |          |     |     |     |      |     |     |     |     |     |      |          |          |      |          |          |
|-----------|----------|------------------------------------------------------------------------------------|-----|-----|-----|-----|-----|-----|-----|------|----------|----------|-----|-----|-----|------|-----|-----|-----|-----|-----|------|----------|----------|------|----------|----------|
| 253446_at | A4g32620 | putative protein predicted protein T10a expressed protein                          | 320 | 401 | 403 | 447 | 488 | 378 | 374 | 438  | 0.86     | 0.207567 | 316 | 316 | 364 | 479  | 367 | 314 | 401 | 384 | 332 | 389  | 0.85     | 0.179983 | 386  | 0.86     | 0.345933 |
| 253447_at | A4g32630 | hypothetical protein                                                               | 35  | 46  | 54  | 48  | 56  | 54  | 45  | 53   | 0.86     | 0.286835 | 36  | 29  | 47  | 37   | 37  | 34  | 38  | 37  | 38  | 37   | 1.03     | 0.798706 | 38   | 1.05     | 0.764908 |
| 253448_at | A4g32640 | putative mRNA for KIAA0079 c sec23sec24 transport protein-related                  | 243 | 337 | 290 | 295 | 408 | 274 | 290 | 326  | 0.89     | 0.512290 | 216 | 175 | 226 | 232  | 225 | 175 | 263 | 233 | 206 | 225  | 0.91     | 0.406930 | 211  | 0.98     | 0.850178 |
| 253449_at | A4g32650 | putative protein hypothetical protein vt                                           | 29  | 35  | 25  | 34  | 27  | 35  | 27  | 35   | 0.78     | 0.103681 | 21  | 30  | 22  | 30   | 28  | 24  | 28  | 29  | 24  | 28   | 0.8      | 0.159047 | 28   | 0.87     | 0.432585 |
| 253450_at | A4g32700 | putative protein MUS308 gene. Drosophila-directed DNA polymerase family 0          | 51  | 59  | 63  | 62  | 76  | 57  | 58  | 65   | 0.88     | 0.317447 | 38  | 44  | 54  | 51   | 50  | 35  | 43  | 40  | 45  | 44   | 1.03     | 0.801464 | 45   | 1.00     | 0.988004 |
| 253451_at | A4g32730 | putative myb-protein transforming prot. myb family transcription factor            | 111 | 122 | 108 | 150 | 164 | 123 | 114 | 146  | 0.78     | 0.064242 | 60  | 59  | 73  | 71   | 66  | 53  | 70  | 68  | 64  | 66   | 0.97     | 0.769057 | 63   | 1.01     | 0.931293 |
| 253417_at | A4g32740 | putative protein                                                                   | 137 | 156 | 149 | 182 | 195 | 160 | 148 | 179  | 0.82     | 0.053253 | 82  | 71  | 111 | 109  | 101 | 77  | 96  | 98  | 88  | 96   | 0.91     | 0.466951 | 96   | 0.91     | 0.612100 |
| 253418_at | A4g32760 | putative protein tm-1B protein, Gallus gallus virus DNA-containing protein / GAT d | 338 | 451 | 398 | 511 | 421 | 478 | 381 | 427  | 1.01     | 0.944051 | 266 | 296 | 308 | 311  | 266 | 296 | 308 | 311 | 266 | 296  | 0.96     | 0.053689 | 347  | 0.96     | 0.019650 |
| 253419_at | A4g32780 | putative protein predicted protein. Ars expressed protein                          | 33  | 44  | 37  | 40  | 46  | 44  | 38  | 43   | 0.87     | 0.204290 | 38  | 38  | 45  | 41   | 41  | 36  | 37  | 38  | 40  | 38   | 1.05     | 0.387914 | 39   | 1.03     | 0.684884 |
| 253389_at | A4g32680 | hypothetical protein : supported by full- expressed protein                        | 255 | 287 | 351 | 335 | 388 | 310 | 298 | 344  | 0.86     | 0.270931 | 268 | 298 | 312 | 469  | 353 | 343 | 338 | 330 | 293 | 367  | 0.80     | 0.084149 | 388  | 0.75     | 0.087432 |
| 253390_at | A4g32750 | hypothetical protein : supported by full- expressed protein                        | 124 | 170 | 211 | 218 | 232 | 187 | 172 | 212  | 0.81     | 0.193529 | 142 | 150 | 173 | 172  | 192 | 181 | 188 | 175 | 155 | 190  | 0.81     | 0.023141 | 196  | 0.79     | 0.042878 |
| 253391_at | A4g32590 | hypothetical protein : supported by cDI ferredoxin-related                         | 237 | 350 | 295 | 356 | 377 | 321 | 291 | 351  | 0.83     | 0.180624 | 328 | 409 | 428 | 561  | 430 | 338 | 429 | 424 | 389 | 443  | 0.89     | 0.397080 | 443  | 0.88     | 0.487597 |
| 253392_at | A4g32650 | potassium channel protein AKKc potas inward rectifier potassium channel, put       | 31  | 36  | 25  | 20  | 21  | 36  | 20  | 176  | 0.00363  | 18       | 22  | 15  | 14  | 11   | 10  | 14  | 12  | 15  | 0   | 1.50 | 0.016311 | 12       | 1.56 | 0.046748 |          |
| 253393_at | A4g32690 | Expressed protein : supported by cDNF 2-on-2 hemoglobin (GLB3)                     | 114 | 134 | 119 | 137 | 150 | 123 | 122 | 137  | 0.89     | 0.208914 | 153 | 161 | 162 | 215  | 170 | 139 | 141 | 136 | 159 | 160  | 0.99     | 0.935843 | 175  | 0.91     | 0.511021 |
| 253394_at | A4g32770 | putative protein predicted protein. Synn lipocopher cyclase, chloroplast / vitamin | 89  | 137 | 145 | 175 | 163 | 125 | 124 | 154  | 0.80     | 0.251597 | 125 | 119 | 146 | 208  | 166 | 139 | 166 | 155 | 130 | 167  | 0.78     | 0.086607 | 171  | 0.76     | 0.132874 |
| 253395_at | A4g32660 | protein kinase AME3 : supported by cL protein kinase (AF-C3) (AME3)                | 251 | 357 | 351 | 359 | 418 | 309 | 320 | 362  | 0.88     | 0.413296 | 311 | 320 | 352 | 485  | 428 | 390 | 414 | 396 | 328 | 423  | 0.78     | 0.008171 | 435  | 0.75     | 0.024333 |
| 253396_at | A4g32720 | putative protein RNA-binding protein L RNA recognition motif (RRM)-containing      | 721 | 821 | 756 | 841 | 988 | 681 | 769 | 837  | 0.92     | 0.401912 | 660 | 505 | 608 | 701  | 723 | 672 | 704 | 710 | 591 | 720  | 0.82     | 0.022271 | 729  | 0.81     | 0.072806 |
| 253397_at | A4g32710 | putative protein kinase protein kinase "pseudoenzyme, protein kinase family crole  | 441 | 546 | 524 | 713 | 760 | 493 | 504 | 656  | 0.77     | 0.160316 | 537 | 472 | 559 | 800  | 640 | 545 | 627 | 594 | 523 | 641  | 0.82     | 0.096480 | 632  | 0.79     | 0.152191 |
| 253398_at | A4g32810 | putative protein retinal pigment micros dioxygenase-related                        | 37  | 51  | 57  | 46  | 52  | 47  | 48  | 48   | 1.00     | 0.981465 | 52  | 45  | 50  | 48   | 52  | 53  | 59  | 51  | 49  | 52   | 0.94     | 0.298567 | 51   | 0.97     | 0.555379 |
| 253399_at | A4g32850 | putative poly(A) polymerase polyribose nucleotidyltransferase family protein       | 581 | 758 | 771 | 742 | 862 | 652 | 703 | 752  | 0.94     | 0.604653 | 687 | 605 | 673 | 820  | 674 | 575 | 850 | 808 | 655 | 745  | 0.88     | 0.256318 | 690  | 0.95     | 0.669895 |
| 253400_at | A4g32860 | putative protein unknown protein T02C putative protein unknown protein T02CX       | 12  | 21  | 17  | 19  | 14  | 17  | 17  | 1.00 | 0.994127 | 18       | 19  | 10  | 8   | 10   | 13  | 17  | 12  | 19  | 12  | 16   | 0.60     | 0.010991 | 10   | 1.84     | 0.005996 |
| 253401_at | A4g32870 | putative protein hypothetical protein F1 expressed protein                         | 63  | 86  | 115 | 49  | 36  | 39  | 88  | 41   | 2.13     | 0.040870 | 154 | 191 | 152 | 45   | 34  | 38  | 38  | 38  | 165 | 39   | 4.27     | 0.000012 | 39   | 4.22     | 0.000678 |
| 253402_at | A4g32880 | HD-zip transcription factor (ahb-B) homeobox-leucine zipper transcription fa       | 89  | 134 | 108 | 164 | 188 | 136 | 110 | 163  | 0.86     | 0.056962 | 63  | 56  | 81  | 131  | 97  | 81  | 103 | 87  | 67  | 100  | 0.67     | 0.042650 | 103  | 0.65     | 0.095024 |
| 253403_at | A4g32830 | putative serine/threonine protein kinase protein kinase, putative                  | 380 | 428 | 379 | 475 | 509 | 398 | 396 | 461  | 0.86     | 0.148605 | 399 | 384 | 443 | 585  | 501 | 444 | 429 | 428 | 409 | 477  | 0.86     | 0.160487 | 510  | 0.80     | 0.087773 |
| 253404_at | A4g32840 | putative pyrophosphate-fructose-6-phophose hydrophosphatase family protein         | 310 | 358 | 356 | 411 | 438 | 353 | 341 | 401  | 0.85     | 0.113586 | 279 | 232 | 315 | 372  | 320 | 271 | 329 | 324 | 275 | 323  | 0.85     | 0.133350 | 321  | 0.86     | 0.222004 |
| 253405_at | A4g32800 | transcription factor T1Y1 homolog, tram AP2 domain-containing transcription fac    | 57  | 58  | 79  | 74  | 78  | 67  | 65  | 73   | 0.89     | 0.355517 | 57  | 62  | 55  | 65   | 56  | 54  | 74  | 66  | 58  | 63   | 0.92     | 0.341441 | 58   | 0.99     | 0.914761 |
| 253406_at | A4g32890 | putative protein GATA transcription fac zinc finger (GATA type) family protein     | 37  | 42  | 46  | 41  | 65  | 47  | 51  | 51   | 0.81     | 0.286993 | 44  | 34  | 40  | 39   | 40  | 38  | 41  | 34  | 39  | 39   | 1.02     | 0.837672 | 39   | 1.00     | 0.995682 |
| 253407_at | A4g32920 | putative protein glycine-rich protein                                              | 208 | 273 | 324 | 322 | 317 | 269 | 268 | 303  | 0.88     | 0.403522 | 178 | 158 | 217 | 235  | 194 | 175 | 210 | 188 | 185 | 200  | 0.92     | 0.424212 | 201  | 0.92     | 0.530240 |
| 253408_at | A4g32950 | putative protein choshosphorine choso protein choshosphatase 2C. outative / PP2k   | 82  | 87  | 112 | 103 | 92  | 100 | 94  | 98   | 0.95     | 0.648480 | 76  | 54  | 94  | 73   | 68  | 64  | 98  | 98  | 87  | 78   | 1.00     | 0.992737 | 88   | 1.14     | 0.336331 |
| 253409_at | A4g32960 | putative protein expressed protein                                                 | 242 | 238 | 268 | 238 | 272 | 253 | 249 | 246  | 0.86     | 0.343621 | 243 | 229 | 244 | 386  | 271 | 290 | 272 | 277 | 258 | 270  | 0.90     | 0.159533 | 273  | 0.90     | 0.131302 |
| 253410_at | A4g32970 | putative protein various predicted prot expressed protein                          | 76  | 107 | 103 | 125 | 139 | 104 | 95  | 123  | 0.78     | 0.119565 | 82  | 92  | 106 | 123  | 104 | 83  | 115 | 116 | 94  | 108  | 0.86     | 0.216339 | 103  | 0.90     | 0.506011 |
| 253411_at | A4g32980 | homeobox gene ATH1 homeobox protein (ATH1)                                         | 142 | 165 | 156 | 395 | 385 | 352 | 354 | 377  | 0.41     | 0.000107 | 182 | 152 | 201 | 432  | 335 | 252 | 376 | 373 | 179 | 354  | 0.51     | 0.005220 | 340  | 0.53     | 0.040190 |
| 253412_at | A4g33000 | putative protein (fragment) calcineurin calcineurin B-like protein 10 (CBL10)      | 188 | 255 | 233 | 290 | 351 | 239 | 225 | 293  | 0.77     | 0.146998 | 272 | 279 | 298 | 408  | 309 | 301 | 259 | 267 | 283 | 308  | 0.92     | 0.506264 | 339  | 0.84     | 0.185742 |
| 253413_at | A4g33020 | putative protein metal transport protein, putative (ZPN9)                          | 25  | 27  | 36  | 31  | 39  | 32  | 29  | 34   | 0.86     | 0.330932 | 21  | 22  | 28  | 25   | 23  | 25  | 24  | 23  | 25  | 24   | 1.03     | 0.693111 | 25   | 1.04     | 0.635265 |
| 253414_at | A4g33050 | putative protein calmodulin-binding family protein                                 | 29  | 27  | 45  | 30  | 31  | 32  | 33  | 31   | 1.09     | 0.659146 | 47  | 58  | 36  | 38   | 31  | 29  | 43  | 38  | 47  | 36   | 1.32     | 0.096686 | 32   | 1.45     | 0.097506 |
| 253415_at | A4g33060 | putative protein peotidiv-crovl cis-tram: peotidiv-crovl cis-trans isomerase cyclo | 202 | 269 | 273 | 261 | 334 | 226 | 248 | 274  | 0.90     | 0.541413 | 209 | 198 | 207 | 284  | 258 | 203 | 255 | 238 | 205 | 248  | 0.83     | 0.054570 | 248  | 0.82     | 0.146083 |
| 253416_at | A4g33070 | pyruvate decarboxylase-1 (Pdc1) pyruvate decarboxylase, putative                   | 25  | 32  | 34  | 26  | 25  | 24  | 31  | 25   | 1.22     | 0.118561 | 36  | 34  | 35  | 15   | 14  | 16  | 20  | 15  | 35  | 16   | 2.18     | 0.000029 | 15   | 2.34     | 0.000044 |
| 253392_at | A4g33300 | putative protein AT1.24 Arabidopsis II glutaredoxin family protein                 | 175 | 202 | 214 | 393 | 397 | 294 | 177 | 362  | 0.54     | 0.092529 | 213 | 222 | 208 | 444  | 302 | 314 | 214 | 334 | 311 | 341  | 0.62     | 0.021117 | 341  | 0.68     | 0.233085 |
| 253393_at | A4g32900 | putative protein supported by full-leniz expressed protein                         | 103 | 131 | 142 | 124 | 163 | 130 | 125 | 139  | 0.90     | 0.477661 | 124 | 156 | 145 | 213  | 157 | 145 | 157 | 137 | 142 | 162  | 0.88     | 0.338802 | 172  | 0.83     | 0.285216 |
| 253384_at | A4g32915 | Expressed protein : supported by full-le expressed protein                         | 130 | 181 | 192 | 180 | 219 | 165 | 168 | 188  | 0.89     | 0.460987 | 163 | 188 | 189 | 241  | 195 | 179 | 185 | 178 | 180 | 196  | 0.92     | 0.384451 | 205  | 0.88     | 0.282284 |
| 253385_at | A4g32930 | putative protein predicted protein. Cae expressed protein                          | 599 | 768 | 955 | 866 | 990 | 905 | 774 | 920  | 0.84     | 0.250711 | 608 | 857 | 975 | 1138 | 919 | 703 | 852 | 865 | 813 | 896  | 0.91     | 0.527053 | 920  | 0.88     | 0.553889 |
| 253386_at | A4g33030 | sulfolipo biosynthesis protein SOD1 : UDP-sulfotransferase / sulfite-U             | 545 | 625 | 534 | 537 | 627 | 447 | 454 | 527  | 0.85     | 0.340554 | 452 | 437 | 445 | 604  | 510 | 486 | 555 | 537 | 483 | 553  | 0.83     | 0.013912 | 553  | 0.83     | 0.071188 |
| 253387_at | A4g33010 | P-Protein - like protein P-Protein precursor                                       | 335 | 387 | 353 | 294 | 335 | 294 | 335 | 294  | 0.93     | 0.585311 | 350 | 301 | 467 | 632  | 431 | 352 | 467 | 459 | 402 | 459  | 0.82     | 0.259401 | 455  | 0.82     | 0.244476 |
| 253388_at | A4g32910 | putative protein : supported by cDNA: expressed protein                            | 468 | 665 | 779 | 657 | 717 | 592 | 641 | 655  | 0.98     | 0.883843 | 509 | 528 | 546 | 638  | 587 | 499 | 700 | 639 | 528 | 613  | 0.86     | 0.111997 | 575  | 0.92     | 0.329052 |
| 253389_at | A4g32940 | gamma-Vipe (vacuolar processing enz. vacuolar processing enzyme gamma / a          | 293 | 439 | 587 | 440 | 517 | 352 | 433 | 436  | 0.99     | 0.973935 | 463 | 564 | 485 | 684  | 587 | 460 | 777 | 728 | 504 | 647  | 0.78     | 0.117359 | 577  | 0.87     | 0.366451 |
| 253390_at | A4g33080 | putative protein kinase protein kinase, protein kinase, putative                   | 273 | 442 | 416 | 514 | 554 | 419 | 384 | 496  | 0.77     | 0.139971 | 273 | 273 | 281 | 402  | 318 | 296 | 331 | 276 | 332 | 383  | 0.83     | 0.060277 | 338  | 0.81     | 0.124636 |
| 253391_at | A4g33090 | aminooxidase - like protein aminooxide aminooxidase M                              | 546 | 679 | 584 | 740 | 594 | 679 | 584 | 679  | 0.89     | 0.314324 | 616 | 547 | 616 | 813  | 766 | 578 | 682 | 616 | 515 | 682  | 0.85     | 0.236403 | 700  | 0.86     | 0.613709 |
| 253392_at | A4g33100 | putative protein various predicted protein expressed protein                       | 104 | 160 | 137 | 148 | 168 | 136 | 134 | 151  | 0.89     | 0.409498 | 141 |     |     |      |     |     |     |     |     |      |          |          |      |          |          |

|             |          |                                                                                                                                                            |      |      |      |      |      |      |      |      |      |          |      |      |      |      |      |      |      |      |      |      |      |          |      |      |          |
|-------------|----------|------------------------------------------------------------------------------------------------------------------------------------------------------------|------|------|------|------|------|------|------|------|------|----------|------|------|------|------|------|------|------|------|------|------|------|----------|------|------|----------|
| 253352_at   | A4g33710 | pathogenesis-related protein 1 precurs pathogenesis-related protein, putative                                                                              | 29   | 33   | 49   | 41   | 40   | 38   | 37   | 40   | 0.94 | 0.711285 | 32   | 39   | 34   | 37   | 30   | 31   | 35   | 33   | 35   | 33   | 1.05 | 0.496327 | 32   | 1.08 | 0.459422 |
| 253353_at   | A4g33730 | pathogenesis-related protein - like put pathogenesis-related protein, putative                                                                             | 35   | 43   | 57   | 58   | 59   | 54   | 45   | 57   | 0.80 | 0.153490 | 29   | 32   | 39   | 39   | 38   | 39   | 48   | 43   | 33   | 41   | 0.80 | 0.050306 | 39   | 0.86 | 0.155835 |
| 253294_at   | A4g33750 | hypothetical protein                                                                                                                                       | 171  | 213  | 270  | 275  | 285  | 238  | 201  | 266  | 0.76 | 0.035580 | 257  | 259  | 240  | 410  | 346  | 301  | 315  | 287  | 262  | 332  | 0.76 | 0.035401 | 352  | 0.72 | 0.035967 |
| 253295_at   | A4g33760 | relative aspartate tRNA ligase aspartate tRNA ligase class II (D, K and N) fa                                                                              | 163  | 170  | 184  | 193  | 190  | 150  | 170  | 193  | 0.88 | 0.151690 | 159  | 134  | 173  | 151  | 168  | 151  | 169  | 149  | 159  | 149  | 1.00 | 0.170551 | 167  | 0.91 | 0.042395 |
| 253296_at   | A4g33770 | putative protein inositol 1,3,4-trisphospho inositol 1,3,4-trisphosphatase 5/6-kinase fa                                                                   | 60   | 82   | 80   | 103  | 102  | 81   | 74   | 95   | 0.78 | 0.096676 | 65   | 60   | 64   | 99   | 75   | 66   | 72   | 73   | 63   | 67   | 0.82 | 0.125249 | 80   | 0.79 | 0.172101 |
| 253297_at   | A4g33810 | beta-van endohydrolase -like protein glyoxyl hydrolase family 10 protein                                                                                   | 24   | 30   | 41   | 35   | 36   | 46   | 32   | 39   | 0.81 | 0.292044 | 22   | 37   | 29   | 28   | 19   | 24   | 27   | 24   | 29   | 24   | 1.20 | 0.259556 | 24   | 1.25 | 0.329847 |
| 253298_at   | A4g33560 | putative protein - supported by full-length expressed protein                                                                                              | 31   | 32   | 31   | 50   | 42   | 42   | 31   | 45   | 0.70 | 0.011180 | 40   | 44   | 63   | 54   | 40   | 31   | 27   | 57   | 49   | 42   | 1.17 | 0.476972 | 42   | 1.17 | 0.483352 |
| 253299_at   | A4g33800 | hypothetical protein - supported by full-length expressed protein                                                                                          | 21   | 24   | 29   | 25   | 25   | 27   | 24   | 27   | 0.86 | 0.141926 | 15   | 22   | 22   | 21   | 16   | 22   | 21   | 16   | 22   | 21   | 1.00 | 0.977851 | 19   | 1.01 | 0.962769 |
| 253300_at   | A4g33580 | carbonate dehydratase - like protein c alpha carbonic anhydrase family protein / carb                                                                      | 165  | 231  | 220  | 282  | 275  | 225  | 205  | 260  | 0.79 | 0.110757 | 253  | 252  | 272  | 413  | 284  | 272  | 267  | 259  | 259  | 290  | 0.87 | 0.340315 | 323  | 0.80 | 0.232960 |
| 253301_at   | A4g33720 | pathogenesis-related protein 1 precurs pathogenesis-related protein, putative                                                                              | 22   | 27   | 28   | 37   | 24   | 26   | 25   | 29   | 0.88 | 0.497043 | 13   | 18   | 24   | 14   | 16   | 13   | 17   | 16   | 18   | 15   | 1.22 | 0.258137 | 14   | 1.30 | 0.278044 |
| 253302_at   | A4g33660 | Expressed protein - supported by full-length expressed protein                                                                                             | 104  | 174  | 92   | 78   | 94   | 80   | 72   | 84   | 0.85 | 0.459468 | 45   | 56   | 55   | 86   | 64   | 66   | 94   | 86   | 52   | 79   | 0.66 | 0.018454 | 72   | 0.72 | 0.065730 |
| 253303_at   | A4g33780 | putative protein - supported by full-length expressed protein                                                                                              | 104  | 174  | 92   | 78   | 94   | 80   | 72   | 84   | 0.85 | 0.133466 | 172  | 114  | 162  | 312  | 250  | 231  | 209  | 188  | 193  | 238  | 0.81 | 0.174641 | 264  | 0.73 | 0.058734 |
| 253304_at   | A4g33840 | putative protein - supported by full-length expressed protein                                                                                              | 603  | 779  | 804  | 856  | 985  | 797  | 729  | 870  | 0.83 | 0.489784 | 617  | 706  | 701  | 1004 | 803  | 750  | 825  | 804  | 875  | 837  | 0.81 | 0.039221 | 852  | 0.79 | 0.069280 |
| 253305_at   | A4g33666 | Expressed protein - supported by full-length expressed protein                                                                                             | 33   | 39   | 41   | 30   | 31   | 35   | 38   | 32   | 1.17 | 0.142212 | 29   | 40   | 32   | 27   | 40   | 26   | 33   | 34   | 34   | 32   | 1.05 | 0.721269 | 31   | 1.08 | 0.692740 |
| 253306_at   | A4g33650 | dynamitin-like protein ADL2                                                                                                                                | 186  | 216  | 230  | 246  | 261  | 199  | 211  | 235  | 0.90 | 0.338085 | 162  | 131  | 168  | 198  | 168  | 145  | 176  | 162  | 153  | 170  | 0.91 | 0.302894 | 170  | 0.90 | 0.433181 |
| 253307_at   | A4g33670 | putative protein auxin-induced protein. L-galactose dehydrogenase (L-GalDH)                                                                                | 347  | 559  | 599  | 590  | 728  | 520  | 502  | 613  | 0.82 | 0.327166 | 458  | 559  | 566  | 757  | 597  | 597  | 631  | 616  | 528  | 640  | 0.82 | 0.056326 | 651  | 0.81 | 0.126126 |
| 253308_at   | A4g33680 | putative protein aminotransferase (Asc aminotransferase class I and II family or male sterility 2-like protein male sterility acyl CoA reductase, putative | 828  | 971  | 950  | 1339 | 1403 | 1029 | 916  | 1257 | 0.73 | 0.051110 | 1202 | 1104 | 1221 | 1708 | 1444 | 1260 | 1390 | 1297 | 1176 | 1420 | 0.83 | 0.065933 | 1471 | 0.80 | 0.094057 |
| 253310_at   | A4g33630 | hypothetical protein - supported by cDI expressed protein                                                                                                  | 200  | 301  | 316  | 318  | 348  | 256  | 272  | 307  | 0.89 | 0.489139 | 210  | 221  | 226  | 316  | 272  | 232  | 271  | 268  | 219  | 272  | 0.81 | 0.027231 | 273  | 0.80 | 0.094035 |
| 253311_s_at | A4g33830 | putative protein auxin endohydrolase II glyoxyl hydrolase family 10 protein III q                                                                          | 30   | 36   | 45   | 42   | 47   | 45   | 37   | 45   | 0.83 | 0.151539 | 31   | 36   | 40   | 32   | 26   | 31   | 38   | 32   | 36   | 32   | 1.12 | 0.257733 | 30   | 1.20 | 0.137569 |
| 253312_s_at | A4g33850 | putative protein (1,4)-beta-van endo glyoxyl hydrolase family 10 protein III q                                                                             | 41   | 45   | 54   | 50   | 61   | 58   | 47   | 56   | 0.83 | 0.131538 | 29   | 32   | 44   | 36   | 34   | 36   | 34   | 35   | 36   | 36   | 0.97 | 0.787451 | 37   | 0.95 | 0.750907 |
| 253313_at   | A4g33870 | putative peroxidase peroxidase ATP12 peroxidase, putative                                                                                                  | 80   | 80   | 72   | 80   | 92   | 73   | 71   | 82   | 0.87 | 0.246706 | 60   | 65   | 66   | 74   | 54   | 55   | 56   | 58   | 64   | 59   | 1.07 | 0.431613 | 61   | 1.04 | 0.704541 |
| 253314_at   | A4g33890 | hypothetical protein                                                                                                                                       | 179  | 263  | 263  | 305  | 371  | 248  | 235  | 308  | 0.76 | 0.181045 | 206  | 216  | 213  | 310  | 244  | 236  | 258  | 231  | 212  | 256  | 0.83 | 0.060378 | 263  | 0.80 | 0.093089 |
| 253315_at   | A4g33900 | putative protein various predicted orotidic kelch repeat-containing F-box family pro                                                                       | 47   | 53   | 76   | 71   | 66   | 63   | 59   | 67   | 0.88 | 0.417685 | 35   | 31   | 50   | 54   | 33   | 35   | 44   | 45   | 39   | 42   | 0.91 | 0.594878 | 41   | 0.95 | 0.814250 |
| 253316_s_at | A4g33930 | putative protein hypothetically regulated pro glycine-rich protein                                                                                         | 23   | 29   | 45   | 36   | 38   | 40   | 32   | 38   | 0.85 | 0.445872 | 27   | 27   | 41   | 29   | 31   | 27   | 35   | 33   | 31   | 31   | 1.02 | 0.882742 | 29   | 1.09 | 0.606284 |
| 253317_at   | A4g33960 | putative protein                                                                                                                                           | 123  | 159  | 180  | 175  | 169  | 151  | 175  | 186  | 0.86 | 0.389985 | 111  | 97   | 116  | 101  | 81   | 83   | 92   | 139  | 127  | 107  | 1.01 | 0.953036 | 91   | 1.18 | 0.102927 |
| 253318_at   | A4g33970 | extensin-like protein extensin-like prot leucine-rich repeat family protein / exten                                                                        | 18   | 14   | 24   | 17   | 21   | 20   | 19   | 19   | 1.00 | 0.989782 | 20   | 22   | 16   | 23   | 20   | 20   | 30   | 24   | 19   | 23   | 0.83 | 0.214831 | 21   | 0.93 | 0.537441 |
| 253319_at   | A4g33990 | putative protein various predicted orotidic pentatricopeptide (PPR) repeat-containi                                                                        | 29   | 36   | 41   | 42   | 47   | 37   | 35   | 42   | 0.84 | 0.215910 | 21   | 19   | 27   | 32   | 24   | 26   | 26   | 26   | 23   | 27   | 0.84 | 0.140053 | 27   | 0.83 | 0.232619 |
| 253320_at   | A4g34020 | putative protein ThiU protein. Escherich DJ-1 family protein                                                                                               | 70   | 101  | 102  | 107  | 111  | 84   | 91   | 101  | 0.90 | 0.501520 | 78   | 78   | 89   | 103  | 94   | 91   | 87   | 91   | 81   | 95   | 0.86 | 0.014557 | 96   | 0.85 | 0.047147 |
| 253321_at   | A4g33910 | putative protein orotidic 4-hydroxylase at orotidylase, 2OG-Fe(II) oxoanase I                                                                              | 254  | 357  | 342  | 387  | 349  | 340  | 342  | 349  | 0.84 | 0.449874 | 288  | 398  | 340  | 349  | 349  | 386  | 355  | 383  | 398  | 383  | 0.86 | 0.262021 | 398  | 0.85 | 0.304253 |
| 253322_at   | A4g33980 | putative protein - supported by full-length expressed protein                                                                                              | 131  | 167  | 288  | 120  | 244  | 176  | 195  | 180  | 1.08 | 0.816773 | 235  | 319  | 205  | 155  | 146  | 220  | 241  | 242  | 253  | 202  | 1.26 | 0.215424 | 174  | 1.46 | 0.128771 |
| 253323_at   | A4g33920 | putative protein protein phosphatase V protein phosphatase 2C family protein /                                                                             | 147  | 182  | 182  | 257  | 259  | 200  | 164  | 239  | 0.86 | 0.028921 | 78   | 85   | 75   | 121  | 86   | 85   | 103  | 99   | 79   | 99   | 0.80 | 0.074868 | 97   | 0.81 | 0.215062 |
| 253324_at   | A4g33940 | Expressed protein - supported by full-length expressed protein                                                                                             | 547  | 568  | 781  | 757  | 808  | 609  | 625  | 725  | 0.88 | 0.324576 | 742  | 877  | 706  | 965  | 664  | 693  | 750  | 753  | 775  | 771  | 1.00 | 0.963875 | 784  | 0.99 | 0.932652 |
| 253325_at   | A4g33925 | Expressed protein - supported by full-length expressed protein                                                                                             | 144  | 179  | 197  | 189  | 219  | 178  | 173  | 189  | 0.89 | 0.324576 | 168  | 167  | 169  | 239  | 209  | 197  | 201  | 190  | 167  | 204  | 0.82 | 0.018679 | 213  | 0.79 | 0.011347 |
| 253329_at   | A4g33865 | Expressed protein - supported by full-length ribosomal protein S29 (RPS29C)                                                                                | 3990 | 4798 | 4489 | 4739 | 5262 | 4329 | 4426 | 4777 | 0.93 | 0.382902 | 4383 | 4289 | 4309 | 5241 | 4772 | 4281 | 5069 | 4930 | 4327 | 4858 | 0.89 | 0.051694 | 4765 | 0.91 | 0.191364 |
| 253329_at   | A4g33985 | Expressed protein - supported by full-length expressed protein                                                                                             | 102  | 158  | 210  | 166  | 264  | 177  | 177  | 202  | 0.87 | 0.059003 | 248  | 297  | 188  | 217  | 189  | 229  | 223  | 209  | 244  | 213  | 1.14 | 0.261983 | 212  | 1.15 | 0.389269 |
| 253329_at   | A4g33905 | Expressed protein - supported by cDNV peroxisomal membrane protein 22 kDa,                                                                                 | 49   | 52   | 80   | 80   | 74   | 67   | 60   | 74   | 0.82 | 0.282159 | 52   | 66   | 68   | 92   | 62   | 60   | 69   | 64   | 62   | 69   | 0.90 | 0.442377 | 71   | 0.88 | 0.479134 |
| 253329_at   | A4g34000 | abscisic acid responsive element-binding ABA-responsive element-binding protein                                                                            | 116  | 152  | 308  | 177  | 216  | 168  | 181  | 186  | 1.03 | 0.936296 | 150  | 161  | 161  | 323  | 239  | 206  | 317  | 296  | 164  | 276  | 0.86 | 0.071454 | 266  | 0.85 | 0.032314 |
| 253329_at   | A4g33950 | protein kinase - like protein protein kinase protein kinase, putative                                                                                      | 83   | 109  | 125  | 142  | 135  | 122  | 106  | 133  | 0.80 | 0.116661 | 62   | 80   | 86   | 153  | 109  | 101  | 120  | 107  | 76   | 118  | 0.64 | 0.020064 | 121  | 0.63 | 0.063604 |
| 253329_at   | A4g34040 | putative protein RING-finger protein. L. zinc finger (C3HC4-type RING finger) fa                                                                           | 284  | 336  | 326  | 332  | 362  | 268  | 315  | 320  | 0.98 | 0.877642 | 252  | 213  | 276  | 330  | 296  | 249  | 266  | 273  | 247  | 283  | 0.87 | 0.169357 | 292  | 0.85 | 0.207950 |
| 253329_s_at | A4g34080 | putative protein predicted protein. Arat expressed protein                                                                                                 | 232  | 273  | 272  | 335  | 331  | 270  | 259  | 312  | 0.83 | 0.099961 | 208  | 199  | 256  | 351  | 259  | 252  | 308  | 296  | 220  | 293  | 0.75 | 0.038775 | 287  | 0.77 | 0.141006 |
| 253329_s_at | A4g34100 | putative protein TEB4 protein. Homo s zinc finger (C3HC4-type RING finger) fa                                                                              | 479  | 644  | 684  | 641  | 715  | 532  | 602  | 629  | 0.96 | 0.753103 | 558  | 542  | 557  | 661  | 549  | 506  | 591  | 570  | 563  | 575  | 0.96 | 0.535755 | 572  | 0.97 | 0.701281 |
| 253329_s_at | A4g34115 | glucosyltransferase - like protein inositol UDP-glucosyltransferase                                                                                        | 11   | 13   | 21   | 26   | 25   | 24   | 15   | 25   | 0.90 | 0.028088 | 10   | 12   | 11   | 15   | 12   | 16   | 29   | 31   | 28   | 39   | 0.31 | 0.003372 | 42   | 0.38 | 0.006002 |
| 253329_s_at | A4g34140 | hypothetical protein                                                                                                                                       | 83   | 128  | 127  | 127  | 135  | 112  | 113  | 125  | 0.90 | 0.497834 | 110  | 111  | 104  | 147  | 111  | 99   | 136  | 122  | 108  | 123  | 0.88 | 0.261651 | 119  | 0.91 | 0.514477 |
| 253329_s_at | A4g34160 | cyclin delta-3 (CYCD3)                                                                                                                                     | 321  | 393  | 344  | 482  | 554  | 388  | 353  | 475  | 0.74 | 0.081394 | 270  | 241  | 285  | 684  | 439  | 440  | 405  | 382  | 265  | 470  | 0.56 | 0.031604 | 521  | 0.51 | 0.036100 |
| 253329_s_at | A4g34120 | SKP1/ASK1 (A111). putative similar to E3 ubiquitin ligase SCF complex subunit                                                                              | 22   | 22   | 27   | 25   | 28   | 23   | 22   | 25   | 0.88 | 0.353972 | 16   | 15   | 24   | 17   | 17   | 13   | 21   | 16   | 18   | 17   | 1.11 | 0.525179 | 15   | 1.20 | 0.375232 |
| 253329_s_at | A4g34190 | putative protein - supported by full-length expressed protein                                                                                              | 446  | 772  | 708  | 776  | 757  | 649  | 691  | 724  | 0.94 | 0.744480 | 724  | 769  | 765  | 479  | 877  | 806  | 873  | 739  | 905  | 876  | 0.86 | 0.076803 | 905  | 0.88 | 0.055103 |
| 253329_s_at | A4g34180 | putative protein hypothetical protein sc cyclase family protein                                                                                            | 611  | 843  | 931  | 947  | 1045 | 800  | 795  | 931  | 0.85 | 0.317397 | 974  | 1075 | 992  | 1283 | 1109 | 1062 | 1021 | 1012 | 1014 | 1098 | 0.92 | 0.274097 | 1152 | 0.88 | 0.136179 |
| 253329_s_at | A4g34200 | Phosphoglycerate dehydrogenase - lik D-3-phosphoglycerate dehydrogenase. I                                                                                 | 673  | 790  | 786  | 882  | 887  | 801  |      |      |      |          |      |      |      |      |      |      |      |      |      |      |      |          |      |      |          |

|             |           |                                                                                       |      |      |      |      |      |      |      |      |      |          |      |      |      |      |      |      |      |      |          |      |      |          |          |      |          |          |
|-------------|-----------|---------------------------------------------------------------------------------------|------|------|------|------|------|------|------|------|------|----------|------|------|------|------|------|------|------|------|----------|------|------|----------|----------|------|----------|----------|
| 253222_at   | A04g34660 | putative protein : supported by full-length SH3 domain-containing protein 2 (SH3P     | 215  | 283  | 294  | 324  | 314  | 260  | 264  | 299  | 0.88 | 0.328412 | 187  | 191  | 218  | 286  | 203  | 198  | 203  | 197  | 199      | 213  | 0.93 | 0.471107 | 222      | 0.89 | 0.382273 |          |
| 253230_at   | A04g34700 | putative protein : supported by full-length SH3 domain family protein / LVR family on | 1084 | 1399 | 1314 | 1508 | 1667 | 1376 | 1266 | 1517 | 0.83 | 0.117324 | 1408 | 1389 | 1532 | 1816 | 1534 | 1431 | 1463 | 1422 | 1442     | 1533 | 0.94 | 0.412568 | 1594     | 0.91 | 0.287761 |          |
| 253200_at   | A04g34720 | vacuolar H+-translocator ATPase 18k1 : vacuolar ATP synthase 16 kDa toroletic         | 624  | 788  | 808  | 951  | 1050 | 836  | 740  | 946  | 0.78 | 0.072509 | 774  | 849  | 851  | 1233 | 952  | 873  | 875  | 849  | 825      | 956  | 0.86 | 0.221988 | 1019     | 0.81 | 0.157414 |          |
| 253201_at   | A04g34730 | putative protein S16 ribosome S16 family protein                                      | 1037 | 1084 | 1064 | 1072 | 1611 | 1238 | 1054 | 1084 | 0.84 | 0.052427 | 1193 | 1201 | 1203 | 1726 | 1817 | 1749 | 1801 | 1781 | 1960     | 1960 | 0.87 | 0.255323 | 2005     | 0.87 | 0.198462 |          |
| 253202_at   | A04g34750 | Excreted protein : supported by full-like 45S ribosomal protein S25, putative         | 486  | 580  | 527  | 540  | 648  | 587  | 531  | 592  | 0.90 | 0.218217 | 800  | 734  | 828  | 1003 | 902  | 827  | 891  | 858  | 787      | 908  | 0.87 | 0.081383 | 931      | 0.85 | 0.126018 |          |
| 253203_at   | A04g34710 | arabinde decarboxylase SPE2 : supor aranine decarboxylase 2 (SPE2)                    | 543  | 432  | 441  | 960  | 1060 | 1058 | 512  | 1026 | 0.50 | 0.000591 | 262  | 236  | 304  | 505  | 498  | 328  | 462  | 441  | 267      | 447  | 0.60 | 0.007486 | 443      | 0.60 | 0.046267 |          |
| 253204_at   | A04g34640 | GTP binding protein beta subunit : sup quinane nucleotide-binding protein beta        | 343  | 444  | 507  | 520  | 535  | 442  | 398  | 499  | 0.80 | 0.070534 | 411  | 422  | 484  | 679  | 544  | 453  | 533  | 481  | 439      | 538  | 0.82 | 0.119952 | 559      | 0.79 | 0.160321 |          |
| 253205_at   | A04g34460 | putative cytosolic associated protein (cap1)                                          | 384  | 534  | 568  | 696  | 696  | 453  | 534  | 508  | 0.82 | 0.185744 | 528  | 538  | 564  | 454  | 378  | 390  | 435  | 454  | 454      | 454  | 0.85 | 0.121090 | 445      | 0.81 | 0.042680 |          |
| 253206_at   | A04g34640 | putative squalene synthase non-conse farnesyl-diphosphate farnesyltransferase         | 844  | 1056 | 981  | 1178 | 1312 | 1010 | 960  | 1167 | 0.82 | 0.126701 | 970  | 901  | 1080 | 1491 | 1258 | 1080 | 1173 | 1149 | 984      | 1230 | 0.80 | 0.052376 | 1277     | 0.77 | 0.087091 |          |
| 253207_at   | A04g34770 | outative protein small auxin ux-regulat auxin-responsive family protein               | 39   | 33   | 36   | 44   | 41   | 37   | 36   | 41   | 0.89 | 0.153818 | 37   | 38   | 43   | 60   | 48   | 44   | 43   | 40   | 39       | 47   | 0.84 | 0.165189 | 50       | 0.78 | 0.102357 |          |
| 253208_at   | A04g34820 | putative protein                                                                      | 63   | 95   | 93   | 90   | 92   | 74   | 84   | 85   | 0.98 | 0.897247 | 70   | 67   | 82   | 74   | 61   | 61   | 61   | 79   | 68       | 73   | 69   | 1.06     | 0.468687 | 66   | 1.11     | 0.295605 |
| 253209_at   | A04g34830 | outative protein membrane-associated pentatricopeptide (PPR) repeat-containi          | 30   | 38   | 40   | 48   | 39   | 50   | 36   | 39   | 0.87 | 0.042455 | 20   | 22   | 24   | 22   | 20   | 17   | 24   | 19   | 22       | 20   | 1.08 | 0.414555 | 20       | 1.12 | 0.241732 |          |
| 253210_at   | A04g34840 | putative protein nucleotide-binding protein                                           | 151  | 170  | 199  | 201  | 223  | 187  | 174  | 204  | 0.85 | 0.157156 | 129  | 169  | 182  | 226  | 189  | 170  | 188  | 171  | 160      | 189  | 0.85 | 0.157156 | 195      | 0.82 | 0.198347 |          |
| 253211_at   | A04g34880 | amidase - like protein amidase, Bacilli amidase family protein                        | 20   | 23   | 24   | 32   | 32   | 26   | 22   | 30   | 0.75 | 0.031778 | 26   | 20   | 26   | 27   | 26   | 23   | 29   | 26   | 24       | 26   | 0.92 | 0.334020 | 25       | 0.95 | 0.646065 |          |
| 253212_s_at | A04g34890 | xanthine dehydrogenase - like protein : xanthine dehydrogenase, putative /// xar      | 88   | 122  | 123  | 130  | 137  | 92   | 111  | 120  | 0.92 | 0.638665 | 79   | 68   | 88   | 115  | 92   | 73   | 106  | 94   | 78       | 96   | 0.81 | 0.133566 | 94       | 0.84 | 0.317873 |          |
| 253213_at   | A04g34910 | RNA helicase (RH16) : DEAD/DEAD box helicase, outative /RH                            | 273  | 277  | 380  | 318  | 390  | 348  | 310  | 352  | 0.88 | 0.363259 | 226  | 177  | 224  | 249  | 243  | 199  | 306  | 279  | 299      | 255  | 0.82 | 0.130863 | 230      | 0.91 | 0.386294 |          |
| 253214_at   | A04g34940 | outative protein karvothein alpha 1, C-armedidase-beta-catenin repeat family out      | 154  | 185  | 244  | 269  | 408  | 278  | 194  | 318  | 0.61 | 0.076684 | 178  | 157  | 178  | 177  | 160  | 152  | 189  | 177  | 171      | 171  | 1.00 | 0.989778 | 163      | 1.05 | 0.474066 |          |
| 253216_at   | A04g34960 | cyclophilin - like protein cyclophilin, An peptidyl-prolyl cis-trans isomerase, putal | 233  | 270  | 286  | 356  | 351  | 322  | 263  | 343  | 0.77 | 0.013250 | 317  | 382  | 384  | 524  | 360  | 364  | 319  | 322  | 361      | 378  | 0.96 | 0.765029 | 416      | 0.87 | 0.401493 |          |
| 253217_at   | A04g34970 | actin depolymerizing factor - like protein actin-depolymerizing factor, putative      | 25   | 24   | 33   | 27   | 32   | 26   | 27   | 28   | 0.97 | 0.776927 | 31   | 31   | 32   | 27   | 23   | 26   | 25   | 24   | 31       | 25   | 1.25 | 0.000676 | 25       | 1.23 | 0.008240 |          |
| 253218_at   | A04g34980 | subtilisin-like serine protease similar to subtilase family protein                   | 961  | 1402 | 1161 | 2107 | 2363 | 1602 | 1175 | 2091 | 0.56 | 0.011327 | 981  | 843  | 972  | 1658 | 1417 | 1202 | 1388 | 1369 | 932      | 1407 | 0.66 | 0.003627 | 1426     | 0.65 | 0.023780 |          |
| 253219_at   | A04g34990 | MYB-like protein myb-related protein Y myb family transcription factor (MYB32)        | 169  | 244  | 204  | 253  | 273  | 231  | 206  | 252  | 0.82 | 0.135829 | 252  | 276  | 276  | 384  | 318  | 259  | 285  | 278  | 268      | 305  | 0.88 | 0.269029 | 320      | 0.84 | 0.234196 |          |
| 253220_s_at | A04g34920 | outative protein phospholipase C, Listé 1-ohosphatidylinositol phosphodiesterase      | 48   | 99   | 77   | 93   | 91   | 65   | 75   | 83   | 0.90 | 0.651073 | 53   | 48   | 51   | 66   | 58   | 56   | 64   | 64   | 51       | 62   | 0.82 | 0.007334 | 60       | 0.84 | 0.048877 |          |
| 253221_at   | A04g34870 | peptidylprolyl isomerase (cyclophilin) : peptidyl-prolyl cis-trans isomerase / cvd    | 2271 | 2584 | 2013 | 3572 | 3661 | 3281 | 2589 | 3505 | 0.74 | 0.013661 | 2664 | 3103 | 3051 | 4130 | 3275 | 3130 | 3386 | 3410 | 2939     | 3466 | 0.85 | 0.081505 | 3511     | 0.84 | 0.168960 |          |
| 253222_at   | A04g34850 | chalcone synthase - like protein chalc; chalcone and stilbene synthase family p       | 33   | 47   | 60   | 61   | 65   | 46   | 47   | 58   | 0.90 | 0.227307 | 29   | 33   | 37   | 33   | 29   | 35   | 36   | 31   | 33       | 33   | 1.00 | 0.987703 | 32       | 1.02 | 0.602070 |          |
| 253223_at   | A04g35000 | L-ascorbate peroxidase, supported by L-ascorbate peroxidase 3 (APX3)                  | 516  | 644  | 707  | 868  | 661  | 623  | 763  | 832  | 0.16 | 0.101097 | 692  | 768  | 769  | 1110 | 800  | 829  | 873  | 834  | 743      | 907  | 0.82 | 0.062139 | 943      | 0.79 | 0.088430 |          |
| 253224_at   | A04g34860 | invertase - like protein mRNA, Liliu; k beta-fructofuranosidase, putative / invert    | 61   | 205  | 221  | 230  | 200  | 185  | 196  | 205  | 0.95 | 0.697610 | 232  | 201  | 237  | 252  | 201  | 179  | 212  | 177  | 223      | 212  | 1.05 | 0.560957 | 211      | 1.06 | 0.635992 |          |
| 253225_at   | A04g35020 | Rho1Ps homolog                                                                        | 796  | 971  | 1087 | 1083 | 1333 | 950  | 951  | 1122 | 0.85 | 0.202494 | 1120 | 1095 | 1050 | 1607 | 1353 | 1316 | 1359 | 1299 | 1088     | 1387 | 0.78 | 0.079227 | 1425     | 0.76 | 0.022849 |          |
| 253226_at   | A04g35010 | beta-galactosidase - like protein beta-L-galactosyl hydrolase family 35 protein       | 73   | 44   | 68   | 37   | 50   | 22   | 62   | 36   | 1.70 | 0.098780 | 20   | 21   | 22   | 19   | 18   | 23   | 20   | 14   | 21       | 19   | 1.11 | 0.353889 | 20       | 1.04 | 0.709918 |          |
| 253227_at   | A04g35070 | putative protein kinase - like leucine-rich repeat protein kinase family protein      | 26   | 29   | 38   | 36   | 26   | 29   | 31   | 31   | 0.91 | 0.281160 | 24   | 23   | 34   | 19   | 24   | 25   | 28   | 24   | 25       | 28   | 1.12 | 0.416938 | 25       | 1.12 | 0.395123 |          |
| 253168_at   | A04g35070 | putative protein various predicted prot glycosyl protein                              | 49   | 70   | 61   | 54   | 55   | 51   | 60   | 54   | 1.12 | 0.348241 | 51   | 58   | 51   | 53   | 39   | 43   | 46   | 49   | 54       | 46   | 1.17 | 0.073638 | 45       | 1.19 | 0.140220 |          |
| 253169_at   | A04g35120 | putative protein various predicted prot leuk containing F-box family pr               | 24   | 32   | 37   | 45   | 43   | 35   | 31   | 41   | 0.75 | 0.104889 | 23   | 26   | 31   | 22   | 25   | 22   | 29   | 25   | 27       | 25   | 1.07 | 0.476588 | 108      | 1.12 | 0.230881 |          |
| 253170_at   | A04g35130 | putative protein various predicted prot pentatricopeptide (PPR) repeat-containi       | 109  | 127  | 143  | 148  | 152  | 131  | 126  | 143  | 0.88 | 0.12834  | 98   | 88   | 113  | 126  | 98   | 90   | 121  | 117  | 100      | 112  | 0.89 | 0.228653 | 238      | 0.92 | 0.524115 |          |
| 253171_at   | A04g35040 | putative protein : supported by full-length ZIP transcription factor family protein   | 232  | 339  | 362  | 336  | 385  | 304  | 311  | 341  | 0.91 | 0.550533 | 315  | 340  | 318  | 463  | 342  | 333  | 346  | 336  | 377      | 463  | 0.86 | 0.223620 | 386      | 0.85 | 0.293490 |          |
| 253172_at   | A04g35060 | outative protein :supported by full-length: heavy-metal-associated domain-contain     | 65   | 60   | 72   | 66   | 85   | 65   | 66   | 72   | 0.91 | 0.425703 | 38   | 38   | 33   | 42   | 40   | 41   | 61   | 42   | 37       | 45   | 0.81 | 0.162023 | 41       | 0.89 | 0.059869 |          |
| 253173_at   | A04g35110 | outative protein :aeURL1 4, Arabidopsis expressed protein                             | 62   | 65   | 97   | 89   | 87   | 70   | 75   | 82   | 0.91 | 0.589350 | 126  | 132  | 129  | 155  | 109  | 143  | 123  | 124  | 129      | 121  | 1.07 | 0.583304 | 119      | 1.08 | 0.625558 |          |
| 253174_at   | A04g35090 | catalase : supported by cDNA: at 1541: catalase                                       | 223  | 348  | 389  | 247  | 177  | 113  | 319  | 179  | 1.78 | 0.090185 | 116  | 125  | 109  | 119  | 92   | 77   | 113  | 103  | 117      | 101  | 1.16 | 0.179752 | 98       | 1.22 | 0.187998 |          |
| 253175_at   | A04g35090 | WD-40 repeat protein (MS13)                                                           | 235  | 263  | 242  | 364  | 383  | 289  | 260  | 345  | 0.75 | 0.055360 | 235  | 215  | 243  | 345  | 286  | 260  | 248  | 231  | 266      | 286  | 0.81 | 0.054657 | 304      | 0.75 | 0.016611 |          |
| 253176_at   | A04g35140 | putative protein Human (H326) mRNA, transducin family protein / WD-40 repeat          | 62   | 93   | 99   | 100  | 127  | 83   | 85   | 104  | 0.82 | 0.334569 | 59   | 60   | 63   | 78   | 66   | 64   | 78   | 66   | 61       | 70   | 0.86 | 0.059137 | 69       | 0.88 | 0.116842 |          |
| 253177_s_at | A04g35150 | O-methyltransferase - like protein catte O-methyltransferase family 2 protein ///     | 18   | 22   | 26   | 38   | 36   | 28   | 22   | 34   | 0.65 | 0.032738 | 24   | 19   | 23   | 27   | 25   | 23   | 20   | 19   | 22       | 23   | 0.97 | 0.778677 | 25       | 0.88 | 0.221872 |          |
| 253178_at   | A04g35170 | outative protein predicted protein. Arat hypothetical protein                         | 27   | 32   | 40   | 42   | 38   | 39   | 33   | 40   | 0.82 | 0.172597 | 22   | 20   | 26   | 28   | 22   | 27   | 23   | 23   | 23       | 25   | 0.91 | 0.296814 | 25       | 0.91 | 0.407369 |          |
| 253179_at   | A04g35200 | outative protein various predicted prot hypothetical protein                          | 18   | 22   | 18   | 12   | 17   | 19   | 14   | 16   | 0.90 | 0.614262 | 10   | 7    | 9    | 12   | 8    | 10   | 9    | 84   | 0.148277 | 10   | 0.84 | 0.148277 | 10       | 0.87 | 0.375723 |          |
| 253180_at   | A04g35210 | outative protein various predicted prot hypothetical protein                          | 18   | 22   | 18   | 12   | 17   | 19   | 14   | 16   | 0.90 | 0.186200 | 22   | 15   | 18   | 19   | 19   | 21   | 18   | 19   | 19       | 22   | 0.97 | 0.085869 | 20       | 0.97 | 0.085869 |          |
| 253181_at   | A04g35180 | amino acid permease - like protein Liliu amino acid transporter family protein        | 81   | 87   | 107  | 128  | 128  | 123  | 92   | 126  | 0.73 | 0.013724 | 74   | 64   | 75   | 137  | 103  | 93   | 115  | 95   | 71       | 109  | 0.65 | 0.014531 | 111      | 0.64 | 0.044050 |          |
| 253182_at   | A04g35190 | putative protein ofct, Mycobacterium lep expressed protein                            | 713  | 337  | 481  | 392  | 384  | 377  | 330  | 384  | 0.86 | 0.578489 | 240  | 230  | 237  | 773  | 547  | 540  | 539  | 501  | 236      | 580  | 0.41 | 0.001879 | 620      | 0.38 | 0.007410 |          |
| 253183_at   | A04g35220 | putative protein kinase - like cytosolic family protein                               | 298  | 409  | 501  | 568  | 710  | 458  | 403  | 579  | 0.70 | 0.12672  | 525  | 604  | 527  | 901  | 720  | 754  | 583  | 545  | 562      | 701  | 0.79 | 0.139154 | 792      | 0.70 | 0.017274 |          |
| 253184_at   | A04g35230 | outative protein protein kinase APK1 / J protein kinase family protein                | 383  | 462  | 529  | 634  | 484  | 383  | 462  | 529  | 0.87 | 0.378110 | 54   | 64   | 67   | 544  | 627  | 540  | 614  | 627  | 540      | 614  | 0.67 | 0.002712 | 640      | 0.67 | 0.022417 |          |
| 253185_at   | A04g35240 | putative protein bz2P protein - Arabido: expressed protein                            | 93   | 127  | 148  | 127  | 134  | 117  | 123  | 126  | 0.97 | 0.838792 | 60   | 56   | 60   | 82   | 64   | 50   | 84   |      |          |      |      |          |          |      |          |          |

|             |           |                                                                                    |      |      |      |      |      |      |      |      |      |          |          |      |      |      |      |      |      |      |      |      |          |          |          |          |          |          |
|-------------|-----------|------------------------------------------------------------------------------------|------|------|------|------|------|------|------|------|------|----------|----------|------|------|------|------|------|------|------|------|------|----------|----------|----------|----------|----------|----------|
| 253134_at   | Ak4g35820 | putative protein procollagen-proline di oxidoreductase, 2OG-Fe(II) oxygenase I     | 19   | 16   | 22   | 24   | 26   | 25   | 19   | 25   | 0.77 | 0.023665 | 16       | 17   | 17   | 17   | 17   | 21   | 17   | 17   | 18   | 0.95 | 0.531032 | 16       | 1.00     | 0.931642 |          |          |
| 253135_at   | Ak4g35830 | cytoplasmic aconitate hydratase (citric acid hydratase, cytoplasmic / citrate      | 791  | 1044 | 1151 | 1113 | 1200 | 1063 | 995  | 1125 | 0.88 | 0.317530 | 675      | 662  | 804  | 853  | 710  | 577  | 837  | 809  | 714  | 757  | 0.94     | 0.587367 | 713      | 1.00     | 0.996611 |          |
| 253106_at   | Ak4g35840 | autative protein zinc finger protein. Ara zinc finger (C3HC4-Boxe RING finger) fa  | 165  | 184  | 202  | 241  | 270  | 233  | 184  | 248  | 0.74 | 0.015151 | 293      | 273  | 307  | 401  | 340  | 286  | 399  | 381  | 291  | 361  | 0.81     | 0.058699 | 342      | 0.85     | 0.921242 |          |
| 253108_at   | Ak4g35850 | autative protein zinc finger protein. Ara zinc finger (C3HC4-Boxe RING finger) fa  | 198  | 238  | 261  | 293  | 330  | 286  | 274  | 347  | 0.84 | 0.316907 | 320      | 226  | 219  | 308  | 247  | 229  | 295  | 269  | 247  | 229  | 0.91     | 0.064591 | 261      | 0.97     | 0.992077 |          |
| 253107_at   | Ak4g35860 | autative protein zinc finger protein. Ara zinc finger (C3HC4-Boxe RING finger) fa  | 150  | 204  | 280  | 241  | 235  | 215  | 178  | 230  | 0.77 | 0.040022 | 130      | 136  | 174  | 215  | 153  | 152  | 188  | 179  | 147  | 177  | 0.83     | 0.157814 | 173      | 0.85     | 0.354728 |          |
| 253108_at   | Ak4g35900 | putative bZIP transcription factor Dc3 ; DNA-binding protein-related               | 29   | 30   | 35   | 39   | 47   | 43   | 31   | 43   | 0.73 | 0.015906 | 25       | 34   | 34   | 30   | 33   | 34   | 42   | 41   | 31   | 36   | 0.87     | 0.285072 | 32       | 0.97     | 0.804970 |          |
| 253109_at   | Ak4g35920 | putative protein predicted protein A T1 expressed protein                          | 451  | 624  | 620  | 729  | 828  | 594  | 565  | 717  | 0.79 | 0.161561 | 396      | 391  | 427  | 666  | 556  | 449  | 489  | 475  | 404  | 535  | 0.76     | 0.035383 | 570      | 0.71     | 0.034711 |          |
| 253110_at   | Ak4g35930 | putative protein predicted protein A T1 expressed protein                          | 59   | 61   | 76   | 81   | 76   | 61   | 59   | 61   | 0.79 | 0.015906 | 56       | 66   | 63   | 56   | 64   | 53   | 50   | 50   | 45   | 50   | 1.00     | 0.972656 | 46       | 1.00     | 0.462934 |          |
| 253111_at   | Ak4g35940 | autative protein glutamic acid-rich orex expressed protein                         | 258  | 313  | 336  | 373  | 435  | 292  | 302  | 368  | 0.82 | 0.234401 | 267      | 258  | 265  | 418  | 353  | 290  | 374  | 326  | 263  | 352  | 0.75     | 0.021417 | 354      | 0.74     | 0.070439 |          |
| 253112_at   | Ak4g35970 | autative ascorbate oxidase ascorba L-ascorbate peroxidase, putative                | 33   | 39   | 52   | 56   | 55   | 54   | 41   | 55   | 0.75 | 0.073581 | 50       | 48   | 51   | 86   | 58   | 55   | 69   | 65   | 50   | 66   | 0.75     | 0.059557 | 66       | 0.75     | 0.173113 |          |
| 253113_at   | Ak4g35985 | autative protein chvical impedance in senescence/dehydration-associated pro        | 131  | 139  | 210  | 238  | 243  | 229  | 160  | 237  | 0.67 | 0.038536 | 85       | 85   | 104  | 110  | 88   | 86   | 120  | 114  | 91   | 104  | 0.88     | 0.277373 | 95       | 0.96     | 0.743186 |          |
| 253114_at   | Ak4g35980 | GTP-binding protein GB2 ; supported by Ras-related GTP-binding protein             | 442  | 638  | 672  | 693  | 725  | 558  | 584  | 659  | 0.89 | 0.051223 | 626      | 646  | 673  | 800  | 716  | 670  | 680  | 682  | 649  | 709  | 0.88     | 0.117465 | 728      | 0.89     | 0.117966 |          |
| 253115_at   | Ak4g35910 | putative protein - supported by full-lenc expressed protein                        | 136  | 185  | 228  | 219  | 236  | 188  | 183  | 214  | 0.86 | 0.359191 | 161      | 179  | 208  | 240  | 200  | 205  | 199  | 183  | 209  | 190  | 0.88     | 0.180554 | 213      | 0.86     | 0.255910 |          |
| 253116_at   | Ak4g35850 | putative protein CRP1, 2aa, mya, qb ; pentaricopeptide (PPR) repeat-containi       | 440  | 519  | 573  | 668  | 692  | 558  | 511  | 639  | 0.80 | 0.084527 | 592      | 562  | 662  | 863  | 723  | 631  | 645  | 631  | 605  | 699  | 0.87     | 0.191029 | 739      | 0.82     | 0.143746 |          |
| 253117_at   | Ak4g35905 | Expressed protein ; supported by full-lenc expressed protein                       | 256  | 399  | 390  | 415  | 465  | 343  | 338  | 409  | 0.83 | 0.260696 | 327      | 354  | 382  | 559  | 418  | 432  | 399  | 400  | 354  | 442  | 0.80     | 0.081253 | 470      | 0.75     | 0.072841 |          |
| 253118_at   | Ak4g35950 | ras-related small GTP-binding protein - Rac-like GTP-binding protein (ARAC6)       | 439  | 526  | 506  | 591  | 621  | 517  | 490  | 576  | 0.85 | 0.100976 | 506      | 443  | 520  | 665  | 609  | 523  | 544  | 517  | 490  | 576  | 0.85     | 0.109648 | 606      | 0.81     | 0.090618 |          |
| 253119_at   | Ak4g35980 | autative protein chosholoase D. Ara: chosholoase D delta / PLD delta (PLD          | 249  | 340  | 379  | 371  | 445  | 334  | 323  | 383  | 0.84 | 0.239526 | 349      | 397  | 377  | 560  | 449  | 400  | 430  | 398  | 374  | 447  | 0.84     | 0.122895 | 470      | 0.80     | 0.124472 |          |
| 253120_at   | Ak4g35790 | autative protein chosholoase D. Ara: chosholoase D delta / PLD delta (PLD          | 243  | 351  | 330  | 401  | 438  | 309  | 308  | 382  | 0.81 | 0.218244 | 289      | 268  | 287  | 362  | 317  | 253  | 350  | 328  | 281  | 322  | 0.87     | 0.162275 | 411      | 0.90     | 0.408327 |          |
| 253121_at   | Ak4g35890 | putative protein predicted protein. Cae L domain-containing protein                | 470  | 602  | 591  | 566  | 609  | 560  | 554  | 578  | 0.96 | 0.618529 | 462      | 377  | 495  | 560  | 411  | 365  | 498  | 476  | 445  | 462  | 0.96     | 0.750217 | 445      | 1.00     | 0.993970 |          |
| 253122_at   | Ak4g35990 | hypothetical protein                                                               | 81   | 119  | 117  | 150  | 136  | 115  | 106  | 134  | 0.79 | 0.148768 | 81       | 97   | 117  | 192  | 119  | 115  | 156  | 133  | 99   | 143  | 0.69     | 0.071405 | 144      | 0.69     | 0.181882 |          |
| 253123_at   | Ak4g36000 | thumatin-like protein thumatin-like o pathogenesis-related thumatin family p       | 16   | 13   | 15   | 22   | 16   | 19   | 15   | 20   | 0.74 | 0.023551 | 11       | 12   | 18   | 12   | 14   | 12   | 18   | 14   | 13   | 14   | 0.97     | 0.831759 | 13       | 1.06     | 0.759472 |          |
| 253124_at   | Ak4g36030 | putative protein unknown protein Arabi armadillo/beta-catenin repeat famly vrot    | 37   | 38   | 38   | 48   | 40   | 37   | 38   | 42   | 0.91 | 0.302665 | 36       | 38   | 39   | 37   | 35   | 34   | 42   | 31   | 38   | 36   | 1.07     | 0.388112 | 35       | 1.08     | 0.097495 |          |
| 253125_at   | Ak4g36040 | DnaJ-like protein DnaJ-like protein. Ph DnaJ heat shock N-terminal domain-co       | 558  | 1431 | 1188 | 358  | 463  | 236  | 1059 | 352  | 3.01 | 0.057864 | 677      | 1025 | 530  | 740  | 636  | 755  | 968  | 964  | 744  | 813  | 0.92     | 0.637636 | 710      | 1.05     | 0.836201 |          |
| 253126_at   | Ak4g36050 | autative protein probable membrane o endonuclease/exonuclease/choshatas            | 98   | 147  | 156  | 144  | 157  | 124  | 134  | 142  | 0.95 | 0.727834 | 104      | 111  | 108  | 144  | 121  | 113  | 153  | 143  | 107  | 135  | 0.80     | 0.035909 | 126      | 0.85     | 0.120181 |          |
| 253127_at   | Ak4g36060 | putative Myc-type transcription factor n basic helix-loop-helix (bHLH) family prot | 25   | 37   | 33   | 32   | 39   | 34   | 32   | 35   | 0.91 | 0.480382 | 28       | 27   | 30   | 29   | 26   | 30   | 33   | 29   | 30   | 36   | 0.96     | 0.553875 | 28       | 1.01     | 0.923800 |          |
| 253128_at   | Ak4g36070 | Calcium-dependent serine/threonine p calcium-dependent protein kinase famly        | 18   | 14   | 14   | 19   | 20   | 8    | 15   | 15   | 0.98 | 0.929883 | 22       | 11   | 17   | 15   | 17   | 21   | 15   | 16   | 17   | 17   | 0.99     | 0.953951 | 18       | 0.94     | 0.798940 |          |
| 253129_at   | Ak4g36020 | glycine-rich protein glycine-rich cold-shock DNA-binding family protein            | 484  | 536  | 611  | 601  | 697  | 580  | 544  | 626  | 0.87 | 0.185311 | 303      | 361  | 370  | 477  | 385  | 357  | 404  | 400  | 345  | 405  | 0.85     | 0.100176 | 406      | 0.85     | 0.217848 |          |
| 253102_at   | Ak4g36105 | Expressed protein ; supported by full-lenc expressed protein                       | 42   | 46   | 59   | 59   | 54   | 57   | 49   | 57   | 0.86 | 0.207728 | 33       | 34   | 53   | 39   | 37   | 34   | 34   | 37   | 40   | 36   | 1.11     | 0.447303 | 37       | 1.10     | 0.619363 |          |
| 253103_at   | Ak4g36110 | autative axin-induced protein high sin axin-responsive protein, putative           | 25   | 22   | 26   | 35   | 45   | 32   | 24   | 34   | 0.71 | 0.002276 | 17       | 16   | 27   | 31   | 26   | 28   | 26   | 24   | 20   | 27   | 0.74     | 0.052223 | 28       | 0.70     | 0.080215 |          |
| 253104_at   | Ak4g36100 | thumatin-like protein thumatin-like o pathogenesis-related thumatin famly o        | 321  | 214  | 360  | 501  | 451  | 360  | 510  | 480  | 0.62 | 0.051911 | 452      | 489  | 399  | 502  | 467  | 611  | 505  | 689  | 417  | 611  | 0.73     | 0.048931 | 617      | 0.83     | 0.108452 |          |
| 253107_at   | Ak4g36140 | autative disease resistance protein TM disease resistance protein (TIR-NBS-LR      | 92   | 127  | 132  | 140  | 158  | 109  | 117  | 136  | 0.86 | 0.381115 | 81       | 73   | 81   | 99   | 86   | 80   | 96   | 90   | 79   | 90   | 0.87     | 0.054562 | 89       | 0.89     | 0.185251 |          |
| 253105_at   | Ak4g36150 | autative disease resistance protein TM disease resistance protein (TIR-NBS-LR      | 154  | 201  | 192  | 212  | 236  | 192  | 182  | 213  | 0.85 | 0.181292 | 114      | 109  | 146  | 179  | 129  | 111  | 158  | 148  | 123  | 145  | 0.85     | 0.262973 | 140      | 0.88     | 0.517125 |          |
| 253076_at   | Ak4g36160 | NAM like protein P.hyrida NAM gene, no apical meristem (NAM) family protein        | 36   | 50   | 50   | 62   | 71   | 59   | 45   | 64   | 0.71 | 0.034816 | 30       | 29   | 30   | 54   | 43   | 40   | 49   | 45   | 29   | 46   | 0.64     | 0.001940 | 46       | 0.65     | 0.018155 |          |
| 253077_at   | Ak4g36170 | hypothetical protein                                                               | 15   | 22   | 19   | 22   | 24   | 24   | 20   | 23   | 0.85 | 0.304796 | 12       | 12   | 19   | 15   | 13   | 16   | 11   | 14   | 13   | 16   | 1.11     | 0.491629 | 14       | 1.19     | 0.339978 |          |
| 253078_at   | Ak4g36180 | autative receptor protein class Cf-2.1 leucine-rich repeat family protein          | 1144 | 1351 | 1211 | 1511 | 1669 | 1290 | 1235 | 1490 | 0.83 | 0.112440 | 1140     | 813  | 1203 | 1295 | 1263 | 1003 | 1214 | 1276 | 1052 | 1210 | 0.87     | 0.210552 | 1187     | 0.89     | 0.424088 |          |
| 253079_at   | Ak4g36190 | autative protein F56F10.1. Caenorhab serine carboxyoxiteadase S28 famly vrot       | 434  | 531  | 572  | 650  | 686  | 527  | 512  | 621  | 0.83 | 0.161201 | 613      | 590  | 636  | 898  | 758  | 655  | 730  | 679  | 613  | 744  | 0.82     | 0.063899 | 770      | 0.80     | 0.093421 |          |
| 253080_at   | Ak4g36200 | hypothetical protein                                                               | 33   | 30   | 39   | 37   | 33   | 36   | 34   | 35   | 0.97 | 0.721367 | 22       | 18   | 30   | 25   | 26   | 24   | 44   | 24   | 23   | 29   | 0.82     | 0.388727 | 25       | 0.93     | 0.636920 |          |
| 253081_at   | Ak4g36210 | autative protein F3D011.3. Caenorhab expressed protein                             | 333  | 461  | 445  | 478  | 506  | 372  | 413  | 452  | 0.91 | 0.539473 | 346      | 328  | 360  | 512  | 375  | 359  | 468  | 452  | 344  | 433  | 0.79     | 0.063448 | 415      | 0.83     | 0.224164 |          |
| 253082_at   | Ak4g36230 | putative glycine-rich cell wall prot of pseudogene, glycine-rich protein           | 31   | 36   | 46   | 41   | 49   | 46   | 38   | 45   | 0.83 | 0.205521 | 32       | 33   | 33   | 36   | 34   | 37   | 33   | 33   | 33   | 35   | 0.95     | 0.139234 | 35       | 0.95     | 0.073913 |          |
| 253083_at   | Ak4g36250 | aldehyde dehydrogenase like protein i aldehyde hydrogrenase family protein         | 320  | 438  | 359  | 398  | 352  | 291  | 373  | 347  | 1.07 | 0.611825 | 225      | 244  | 260  | 340  | 230  | 214  | 198  | 206  | 243  | 237  | 1.02     | 0.881174 | 261      | 0.93     | 0.680364 |          |
| 253084_at   | Ak4g36260 | autative protein lateral root primordia (i zinc finger protein-related             | 38   | 65   | 52   | 74   | 96   | 69   | 51   | 79   | 0.65 | 0.067042 | 47       | 46   | 50   | 106  | 88   | 82   | 85   | 82   | 48   | 89   | 0.54     | 0.000497 | 92       | 0.52     | 0.003650 |          |
| 253085_s_at | Ak4g36270 | autative protein hvethetical protein. A ATP-binding domain, ATPase-like domain     | 71   | 120  | 95   | 139  | 153  | 121  | 95   | 138  | 0.69 | 0.066138 | 43       | 46   | 50   | 68   | 47   | 43   | 48   | 49   | 46   | 51   | 0.91     | 0.444009 | 53       | 0.88     | 0.464695 |          |
| 253086_at   | Ak4g36280 | hypothetical protein                                                               | 25   | 23   | 23   | 25   | 23   | 23   | 20   | 23   | 0.92 | 0.744377 | 20       | 10   | 23   | 18   | 23   | 22   | 18   | 22   | 18   | 22   | 0.81     | 0.357807 | 19       | 0.84     | 0.089787 |          |
| 253087_at   | Ak4g36350 | purple acid phosphatase like protein calcineurin-like phosphoesterase family       | 30   | 65   | 44   | 41   | 49   | 46   | 40   | 46   | 1.22 | 0.111    | 0.684915 | 29   | 22   | 33   | 42   | 28   | 41   | 34   | 32   | 28   | 35       | 0.79     | 0.133485 | 37       | 0.76     | 0.179009 |
| 253088_at   | Ak4g36220 | ferulate-5-hydroxylase (FAH1) ; suppo cytochrome P450 8A41 (CYP8A41) / fer         | 21   | 25   | 30   | 30   | 29   | 25   | 29   | 28   | 1.05 | 0.792155 | 20       | 22   | 21   | 16   | 12   | 13   | 14   | 12   | 12   | 13   | 1.60     | 0.000358 | 14       | 1.55     | 0.004359 |          |
| 253089_at   | Ak4g36290 | autative protein hvethetical protein. A ATP-binding domain, ATPase-like domain     | 141  | 206  | 201  | 216  | 270  | 208  | 182  | 231  | 0.79 | 0.161258 | 158      | 139  | 162  | 194  | 180  | 134  | 192  | 178  | 153  | 176  | 0.87     | 0.197670 | 169      | 0.90     | 0.456593 |          |
| 253090_at   | Ak4g36360 | beta-calactoidase like protein ; suopor beta-calactoidase, outative / lactase, o   | 384  | 540  | 689  | 655  | 684  | 545  | 436  | 568  | 0.65 | 0.012763 | 459      | 508  | 464  | 656  | 561  | 643  | 656  | 604  | 567  | 684  | 0.64     | 0.00112  | 685      | 0.62     | 0.004560 |          |
| 2           |           |                                                                                    |      |      |      |      |      |      |      |      |      |          |          |      |      |      |      |      |      |      |      |      |          |          |          |          |          |          |

|             |           |                                                                                     |     |      |     |      |      |      |     |      |          |          |     |     |     |      |     |     |      |     |     |      |          |          |          |          |          |          |
|-------------|-----------|-------------------------------------------------------------------------------------|-----|------|-----|------|------|------|-----|------|----------|----------|-----|-----|-----|------|-----|-----|------|-----|-----|------|----------|----------|----------|----------|----------|----------|
| 253014_at   | At4g37940 | MADS-box protein AGL17-like protein MADS-box family protein                         | 20  | 25   | 28  | 25   | 27   | 26   | 24  | 26   | 0.520161 | 22       | 29  | 26  | 21  | 18   | 21  | 24  | 24   | 25  | 21  | 1.18 | 0.107324 | 20       | 1.27     | 0.075092 |          |          |
| 253015_at   | At4g37950 | hypothetical protein                                                                | 21  | 27   | 26  | 31   | 31   | 38   | 25  | 33   | 0.75     | 0.051582 | 19  | 23  | 23  | 23   | 20  | 18  | 20   | 19  | 22  | 20   | 1.06     | 0.418934 | 20       | 1.05     | 0.624955 |          |
| 253016_at   | At4g37960 | autative protein partial LG127/30 gene expressed protein                            | 20  | 19   | 22  | 25   | 40   | 26   | 20  | 30   | 0.67     | 0.121736 | 12  | 11  | 11  | 15   | 11  | 15  | 14   | 15  | 11  | 14   | 0.79     | 0.032475 | 14       | 0.80     | 0.117112 |          |
| 253017_at   | At4g38110 | cinamyl alcohol dehydrogenase-like (manitol dehydrogenase, putative)                | 23  | 29   | 38  | 38   | 38   | 38   | 38  | 38   | 0.68     | 0.038015 | 24  | 23  | 24  | 28   | 26  | 24  | 26   | 24  | 28  | 25   | 1.06     | 0.371441 | 26       | 1.05     | 0.700265 |          |
| 253018_at   | At4g38000 | autative protein Zn finger protein BBF2 DoF-type zinc finger domain-containing c    | 50  | 122  | 74  | 76   | 77   | 62   | 82  | 71   | 1.14     | 0.685666 | 43  | 42  | 55  | 58   | 47  | 47  | 42   | 46  | 47  | 0.98 | 0.891530 | 51       | 0.92     | 0.503029 |          |          |
| 253019_at   | At4g38010 | putative protein cpr1-hcf111 allele,enc pentatricopeptide (PPR) repeat-contains     | 82  | 94   | 111 | 124  | 141  | 105  | 95  | 123  | 0.77     | 0.101678 | 64  | 57  | 72  | 83   | 68  | 66  | 66   | 61  | 64  | 69   | 0.93     | 0.460596 | 72       | 0.89     | 0.311897 |          |
| 253020_at   | At4g38020 | hypothetical protein                                                                | 106 | 171  | 145 | 181  | 179  | 141  | 141 | 167  | 0.84     | 0.322402 | 177 | 178 | 172 | 271  | 203 | 206 | 203  | 204 | 175 | 217  | 0.81     | 0.059452 | 227      | 0.77     | 0.084918 |          |
| 253021_at   | At4g38030 | autative protein permealase 1 - Mesemb                                              | 50  | 50   | 513 | 212  | 212  | 205  | 57  | 209  | 0.27     | 0.000189 | 66  | 65  | 62  | 71   | 153 | 190 | 190  | 190 | 162 | 171  | 0.43     | 0.001090 | 162      | 0.47     | 0.000456 |          |
| 253022_at   | At4g38060 | putative protein                                                                    | 152 | 268  | 268 | 261  | 257  | 221  | 230 | 245  | 0.93     | 0.699297 | 306 | 239 | 264 | 355  | 303 | 274 | 335  | 333 | 270 | 320  | 0.84     | 0.077286 | 311      | 0.87     | 0.250882 |          |
| 253023_at   | At4g38070 | hypothetical protein                                                                | 41  | 45   | 56  | 24   | 27   | 26   | 47  | 26   | 1.83     | 0.009094 | 21  | 24  | 29  | 20   | 21  | 18  | 14   | 17  | 25  | 18   | 1.38     | 0.026750 | 20       | 1.27     | 0.107096 |          |
| 253024_at   | At4g38080 | putative protein                                                                    | 10  | 13   | 15  | 15   | 16   | 16   | 12  | 16   | 0.79     | 0.100822 | 12  | 10  | 17  | 14   | 14  | 12  | 12   | 12  | 11  | 13   | 1.03     | 0.825120 | 13       | 0.97     | 0.868876 |          |
| 253025_at   | At4g38110 | hypothetical protein                                                                | 10  | 108  | 89  | 129  | 127  | 108  | 93  | 121  | 0.77     | 0.080022 | 73  | 108 | 70  | 78   | 108 | 82  | 72   | 74  | 83  | 80   | 0.89     | 0.335852 | 87       | 0.84     | 0.277407 |          |
| 253026_at   | At4g38120 | hypothetical protein                                                                | 34  | 46   | 46  | 53   | 55   | 50   | 42  | 53   | 0.79     | 0.083623 | 26  | 36  | 43  | 38   | 38  | 32  | 33   | 31  | 32  | 33   | 0.95     | 0.538653 | 34       | 0.93     | 0.536460 |          |
| 253027_at   | At4g38150 | putative protein leaf protein (PncA01) - pentatricopeptide (PPR) repeat-contains    | 214 | 259  | 223 | 306  | 326  | 264  | 232 | 299  | 0.78     | 0.043736 | 223 | 224 | 242 | 304  | 269 | 278 | 264  | 240 | 230 | 271  | 0.85     | 0.030068 | 284      | 0.81     | 0.011429 |          |
| 253028_at   | At4g38160 | putative protein                                                                    | 163 | 252  | 215 | 207  | 230  | 177  | 210 | 205  | 1.03     | 0.852944 | 210 | 207 | 199 | 274  | 208 | 232 | 242  | 245 | 205 | 240  | 0.86     | 0.051234 | 238      | 0.86     | 0.169576 |          |
| 253029_at   | At4g38170 | hypothetical protein                                                                | 86  | 111  | 109 | 127  | 130  | 112  | 102 | 123  | 0.83     | 0.102141 | 83  | 81  | 98  | 112  | 84  | 84  | 86   | 93  | 87  | 92   | 0.95     | 0.604117 | 93       | 0.94     | 0.622543 |          |
| 253030_at   | At4g38180 | hypothetical protein                                                                | 77  | 88   | 110 | 126  | 132  | 118  | 92  | 125  | 0.73     | 0.030846 | 77  | 71  | 87  | 104  | 86  | 77  | 91   | 81  | 78  | 88   | 0.89     | 0.232610 | 99       | 0.88     | 0.302231 |          |
| 253031_at   | At4g38190 | putative protein cellulose synthase - Pi cellulose synthase family protein          | 72  | 83   | 111 | 93   | 116  | 91   | 89  | 100  | 0.89     | 0.465197 | 45  | 41  | 47  | 41   | 47  | 40  | 40   | 50  | 47  | 44   | 0.50     | 0.936609 | 43       | 1.04     | 0.596396 |          |
| 253032_at   | At4g38200 | quinane nucleotide-exchange protein - quinane nucleotide exchange family prot       | 205 | 238  | 223 | 268  | 287  | 217  | 222 | 257  | 0.86     | 0.197149 | 177 | 165 | 207 | 244  | 217 | 243 | 221  | 217 | 183 | 228  | 0.80     | 0.010666 | 234      | 0.78     | 0.028710 |          |
| 253033_at   | At4g38220 | autative protein aminocyclase I - Sus s aminocyclase, putative / N-acyl-L-amino     | 342 | 485  | 457 | 513  | 602  | 414  | 428 | 510  | 0.84     | 0.305462 | 544 | 581 | 645 | 773  | 652 | 614 | 607  | 586 | 590 | 646  | 0.91     | 0.296870 | 680      | 0.87     | 0.186810 |          |
| 253034_at   | At4g38230 | calcium-dependent protein kinase-like calcium-dependent protein kinase, putat       | 38  | 39   | 49  | 48   | 59   | 47   | 42  | 51   | 0.82     | 0.143080 | 39  | 47  | 45  | 56   | 43  | 35  | 60   | 41  | 44  | 47   | 0.94     | 0.659094 | 44       | 0.99     | 0.027778 |          |
| 253035_at   | At4g38240 | divcosyltransferase like protein alpha1- alpha-1,3-mannosyl-divcosyl protein beta-1 | 214 | 307  | 327 | 296  | 347  | 293  | 283 | 312  | 0.91     | 0.491443 | 275 | 288 | 267 | 353  | 308 | 263 | 344  | 303 | 277 | 314  | 0.88     | 0.135205 | 308      | 0.90     | 0.302038 |          |
| 253036_at   | At4g38340 | autative protein other predicted protein: RWP-RK domain-containing protein          | 28  | 22   | 25  | 24   | 26   | 20   | 25  | 23   | 0.07     | 0.492086 | 17  | 25  | 22  | 20   | 17  | 19  | 26   | 19  | 21  | 20   | 1.04     | 0.786003 | 19       | 1.13     | 0.403882 |          |
| 253037_at   | At4g38270 | autative protein other predicted Arabid: glycosyl transferase family 8 protein      | 244 | 295  | 309 | 323  | 370  | 289  | 283 | 327  | 0.86     | 0.221200 | 231 | 202 | 245 | 328  | 291 | 228 | 266  | 264 | 226 | 275  | 0.82     | 0.083792 | 282      | 0.80     | 0.146339 |          |
| 253038_s_at | At4g38300 | putative protein tapetum specific protein: glycosyl hydrolase family 10 protein     | 62  | 62   | 82  | 102  | 114  | 91   | 69  | 102  | 0.67     | 0.022938 | 76  | 72  | 77  | 100  | 88  | 65  | 76   | 71  | 75  | 80   | 0.94     | 0.576504 | 84       | 0.99     | 0.419836 |          |
| 253039_at   | At4g38330 | putative protein                                                                    | 214 | 361  | 408 | 344  | 410  | 316  | 328 | 357  | 0.92     | 0.677675 | 166 | 219 | 281 | 329  | 212 | 233 | 288  | 271 | 222 | 267  | 0.83     | 0.267706 | 258      | 0.86     | 0.501896 |          |
| 253040_at   | At4g38100 | hypothetical protein - supported by full- expressed protein                         | 407 | 526  | 623 | 527  | 604  | 467  | 519 | 532  | 0.97     | 0.862479 | 547 | 592 | 563 | 790  | 644 | 661 | 615  | 571 | 567 | 654  | 0.87     | 0.116878 | 695      | 0.82     | 0.046320 |          |
| 253046_at   | At4g38250 | autative amino acid transport protein a amino acid transporter family protein       | 411 | 526  | 611 | 408  | 711  | 565  | 529 | 561  | 0.94     | 0.773883 | 530 | 509 | 578 | 751  | 583 | 543 | 622  | 651 | 539 | 630  | 0.86     | 0.114522 | 626      | 0.86     | 0.263417 |          |
| 253047_at   | At4g38090 | autative protein hydrochthelial protein HI expressed protein                        | 356 | 550  | 639 | 567  | 638  | 512  | 515 | 573  | 0.90     | 0.562462 | 449 | 599 | 540 | 751  | 552 | 528 | 618  | 613 | 589 | 602  | 0.88     | 0.280942 | 610      | 0.87     | 0.383878 |          |
| 253048_at   | At4g38210 | oxazolin-like protein oxanin (GXEX expansion, putative (EXP20)                      | 75  | 91   | 46  | 43   | 86   | 42   | 45  | 0.53 | 0.616246 | 36       | 35  | 104 | 85  | 96   | 98  | 93  | 104  | 93  | 120 | 96   | 1.04     | 0.631523 | 104      | 0.99     | 0.526498 |          |
| 253049_at   | At4g37930 | glycine hydroxymethyltransferase like i glycine hydroxymethyltransferase / serin    | 157 | 254  | 220 | 482  | 371  | 329  | 210 | 394  | 0.53     | 0.026848 | 303 | 272 | 369 | 724  | 488 | 518 | 558  | 520 | 515 | 544  | 0.58     | 0.017412 | 547      | 0.58     | 0.072590 |          |
| 253050_at   | At4g38225 | Expressed protein - supported by full- expressed protein                            | 146 | 208  | 224 | 200  | 236  | 180  | 193 | 206  | 0.94     | 0.687050 | 241 | 231 | 229 | 296  | 249 | 249 | 257  | 241 | 234 | 258  | 0.91     | 0.116364 | 265      | 0.88     | 0.128251 |          |
| 253051_at   | At4g38040 | putative protein Human multiple exocit, exocytin family protein                     | 365 | 457  | 420 | 462  | 515  | 393  | 414 | 457  | 0.91     | 0.385896 | 388 | 360 | 395 | 491  | 423 | 396 | 446  | 405 | 381 | 432  | 0.88     | 0.075823 | 436      | 0.87     | 0.139946 |          |
| 253052_at   | At4g38060 | autative protein T10 protein - no expressed protein                                 | 86  | 112  | 109 | 106  | 116  | 102  | 102 | 105  | 0.94     | 0.557107 | 107 | 123 | 112 | 146  | 119 | 122 | 115  | 114 | 127 | 140  | 0.90     | 0.195938 | 132      | 0.87     | 0.122790 |          |
| 253053_at   | At4g38130 | Histone deacetylase - supported by CD histone deacetylase (RPD3A)                   | 822 | 1041 | 961 | 1351 | 1375 | 1117 | 942 | 1281 | 0.74     | 0.031297 | 756 | 801 | 824 | 1346 | 984 | 883 | 1025 | 975 | 794 | 1043 | 0.76     | 0.058539 | 1071     | 0.74     | 0.122545 |          |
| 253054_at   | At4g37980 | cinamyl-alcohol dehydrogenase EL13- manitol dehydrogenase, autative (EL13           | 24  | 34   | 31  | 43   | 40   | 34   | 35  | 33   | 0.91     | 0.610742 | 30  | 31  | 37  | 38   | 39  | 28  | 38   | 31  | 33  | 35   | 0.94     | 0.579616 | 35       | 0.94     | 0.640141 |          |
| 253055_at   | At4g37990 | cinamyl-alcohol dehydrogenase EL13- manitol dehydrogenase, autative (EL13           | 77  | 103  | 113 | 123  | 147  | 123  | 98  | 131  | 0.74     | 0.068310 | 86  | 108 | 98  | 108  | 84  | 97  | 100  | 106 | 97  | 99   | 0.88     | 0.778284 | 97       | 1.00     | 0.980411 |          |
| 253056_at   | At4g38320 | autative protein Nucleoside diphosphate kinase (NDPK) family protein                | 443 | 575  | 692 | 572  | 692  | 515  | 541 | 593  | 0.91     | 0.516288 | 624 | 402 | 544 | 616  | 515 | 453 | 689  | 650 | 469 | 519  | 0.82     | 0.537695 | 519      | 0.89     | 0.020433 |          |
| 253057_at   | At4g38380 | autative protein T19C21.18 Arabidopsis MATE efflux protein-related                  | 129 | 158  | 207 | 199  | 208  | 192  | 165 | 200  | 0.83     | 0.203027 | 97  | 86  | 104 | 126  | 102 | 91  | 120  | 113 | 96  | 110  | 0.87     | 0.160254 | 106      | 0.90     | 0.410549 |          |
| 253058_at   | At4g38390 | autative growth regulator protein auxin expressed protein                           | 35  | 49   | 45  | 32   | 38   | 31   | 43  | 33   | 1.29     | 0.110912 | 36  | 35  | 36  | 26   | 22  | 23  | 28   | 28  | 26  | 25   | 1.41     | 0.000521 | 24       | 1.50     | 0.000456 |          |
| 253059_at   | At4g38410 | autative cold-regulated protein cold-reg, putative                                  | 43  | 46   | 60  | 64   | 66   | 63   | 50  | 64   | 0.77     | 0.054336 | 42  | 49  | 61  | 49   | 53  | 53  | 57   | 49  | 51  | 52   | 0.97     | 0.761375 | 52       | 0.98     | 0.885986 |          |
| 253060_at   | At4g38420 | autative pectinesterase pectinesterase multi-cooper oxidase type I family protein   | 20  | 23   | 23  | 24   | 23   | 20   | 23  | 23   | 1.05     | 0.070396 | 16  | 23  | 21  | 20   | 12  | 15  | 17   | 18  | 18  | 24   | 0.94     | 0.772912 | 16       | 1.06     | 0.773604 |          |
| 253061_at   | At4g38440 | putative protein                                                                    | 184 | 222  | 289 | 249  | 265  | 180  | 222 | 217  | 1.04     | 0.815353 | 170 | 144 | 175 | 183  | 174 | 168 | 147  | 180 | 171 | 176  | 1.07     | 0.433687 | 177      | 1.05     | 0.676651 |          |
| 253062_at   | At4g38470 | protein kinase like protein protein kinase family protein                           | 375 | 612  | 725 | 187  | 272  | 155  | 571 | 205  | 279      | 0.028634 | 175 | 209 | 141 | 129  | 133 | 123 | 125  | 172 | 166 | 175  | 1.45     | 0.121    | 0.172894 | 128      | 1.36     | 0.078423 |
| 253063_at   | At4g38520 | putative protein phosphatase-2c protein phosphatase 2C family protein (I            | 354 | 424  | 394 | 513  | 585  | 439  | 391 | 512  | 0.76     | 0.060219 | 354 | 338 | 385 | 578  | 460 | 392 | 492  | 468 | 359 | 478  | 0.75     | 0.027992 | 477      | 0.75     | 0.103096 |          |
| 253064_at   | At4g38540 | monooxygenase 2 (MO2) - monooxygenase, putative (MO2)                               | 37  | 34   | 61  | 46   | 41   | 43   | 49  | 0.86 | 0.432277 | 37       | 36  | 40  | 36  | 40   | 45  | 48  | 38   | 41  | 39  | 41   | 0.92     | 0.356223 | 37       | 1.01     | 0.882712 |          |
| 253065_at   | At4g38480 | autative protein gene PC328 protein - transducin family protein / WD-40 repeat      | 68  | 97   | 83  | 97   | 83   | 84   | 82  | 97   | 0.87     | 0.793211 | 78  | 71  | 81  | 86   | 77  | 86  | 81   | 81  | 86  | 77   | 0.87     | 0.033498 | 89       | 0.87     | 0.107816 |          |
| 253066_at   | At4g38370 | hypothetical protein - supported by full- phospholipid-acyltransferase phospholipid | 299 | 384  | 409 | 336  | 406  | 299  | 364 | 347  | 1.05     | 0.732514 | 404 | 534 | 433 | 503  | 418 | 412 | 407  | 391 | 457 | 426  | 1.07     | 0.45     |          |          |          |          |

|           |           |                                                                                       |      |      |      |      |      |      |      |      |          |           |      |      |      |      |      |      |      |      |          |      |          |          |          |          |          |          |
|-----------|-----------|---------------------------------------------------------------------------------------|------|------|------|------|------|------|------|------|----------|-----------|------|------|------|------|------|------|------|------|----------|------|----------|----------|----------|----------|----------|----------|
| 252926_at | Ak4g38920 | H+-transporting ATPase 16k chain P2 cytosolic ATP synthase 16 kDa proteol             | 1657 | 2115 | 1943 | 2375 | 2689 | 2207 | 1905 | 2424 | 0.7      | 0.055786  | 2157 | 2418 | 2261 | 2977 | 2436 | 2317 | 2189 | 2152 | 2279     | 2414 | 0.94     | 0.536805 | 2577     | 0.88     | 0.242195 |          |
| 252927_at | Ak4g39090 | cysteine proteinase RD19A identical to cysteine proteinase RD19a (RD19A) / th         | 3079 | 3942 | 4546 | 2688 | 2689 | 2739 | 3856 | 3072 | 1.26     | 0.231488  | 3747 | 4302 | 3482 | 3637 | 3553 | 3360 | 4603 | 4271 | 3844     | 3885 | 0.99     | 0.912846 | 3517     | 1.09     | 0.269613 |          |
| 252928_at | Ak4g38940 | autative protein more than 30 predicted kelp repeat-containing F-box family pro       | 1293 | 263  | 318  | 335  | 381  | 270  | 258  | 329  | 0.79     | 0.218767  | 224  | 244  | 239  | 236  | 265  | 282  | 275  | 276  | 276      | 279  | 0.85     | 0.046140 | 281      | 0.84     | 0.125534 |          |
| 252929_at | Ak4g39100 | autative protein various predicted prot kelp repeat-containing F-box family pro       | 307  | 634  | 634  | 634  | 296  | 418  | 432  | 0.87 | 0.234228 | 347       | 395  | 395  | 514  | 454  | 514  | 454  | 514  | 454  | 514      | 454  | 0.85     | 0.046140 | 281      | 0.84     | 0.125534 |          |
| 252930_at | Ak4g39010 | autative endo-1,4-beta-glucanase endo glycosyl hydrolase family 9 protein             | 126  | 113  | 114  | 161  | 171  | 127  | 118  | 153  | 0.77     | 0.065144  | 91   | 77   | 97   | 117  | 107  | 93   | 88   | 102  | 93       | 88   | 102      | 0.86     | 0.098884 | 105      | 0.84     | 0.124469 |
| 252931_at | Ak4g38930 | autative ubiquitin-dependent proteolytic ubiquitin fusion degradation UFD1 fami       | 177  | 238  | 219  | 251  | 257  | 234  | 211  | 247  | 0.85     | 0.2137694 | 251  | 290  | 278  | 386  | 278  | 259  | 295  | 271  | 273      | 298  | 0.92     | 0.466274 | 308      | 0.89     | 0.449523 |          |
| 252932_at | Ak4g39080 | putative protein pump vacuolar protein / vacuolar fusion ATPase, putative             | 583  | 778  | 866  | 895  | 1009 | 741  | 742  | 882  | 0.84     | 0.288764  | 34   | 349  | 444  | 533  | 458  | 405  | 461  | 435  | 402      | 458  | 0.88     | 0.159481 | 465      | 0.86     | 0.248129 |          |
| 252933_at | Ak4g39100 | autative receptor like protein kinase re protein kinase family protein                | 51   | 61   | 75   | 65   | 51   | 44   | 51   | 50   | 0.87     | 0.214806  | 34   | 39   | 47   | 51   | 47   | 40   | 32   | 40   | 39       | 42   | 1.07     | 0.562402 | 42       | 0.81     | 0.272585 |          |
| 252934_at | Ak4g39120 | Inositol monophosphatase - like protein inositol monophosphatase family protein       | 112  | 140  | 140  | 172  | 192  | 150  | 134  | 171  | 0.78     | 0.083617  | 129  | 128  | 138  | 193  | 152  | 151  | 143  | 133  | 132      | 154  | 0.86     | 0.156751 | 165      | 0.80     | 0.079256 |          |
| 252935_at | Ak4g39150 | dnaj-like protein CAJ1 protein. Sacchi DNAJ heat shock N-terminal domain-co           | 361  | 450  | 402  | 534  | 500  | 476  | 404  | 533  | 0.76     | 0.036599  | 463  | 448  | 483  | 800  | 616  | 554  | 605  | 596  | 464      | 634  | 0.73     | 0.032529 | 657      | 0.71     | 0.060983 |          |
| 252936_at | Ak4g39160 | autative protein transcription initiation 1 myb family transcription factor           | 100  | 118  | 114  | 140  | 151  | 116  | 111  | 136  | 0.82     | 0.097156  | 96   | 80   | 101  | 131  | 122  | 104  | 104  | 116  | 92       | 116  | 0.80     | 0.033499 | 119      | 0.77     | 0.060092 |          |
| 252937_at | Ak4g39180 | SEC14 - like protein phosphatidylinositol SEC14 cytosolic factor, putative / phos     | 25   | 29   | 34   | 22   | 27   | 22   | 29   | 24   | 1.24     | 0.224228  | 41   | 41   | 43   | 63   | 48   | 16   | 18   | 19   | 21       | 42   | 1.16     | 0.000001 | 17       | 2.46     | 0.000009 |          |
| 252938_at | Ak4g39190 | autative protein various predicted prot kelp repeat-containing F-box family pro       | 23   | 30   | 45   | 60   | 55   | 45   | 33   | 53   | 0.62     | 0.080684  | 52   | 47   | 47   | 75   | 53   | 77   | 74   | 49   | 66       | 74   | 0.87     | 0.073869 | 59       | 0.82     | 0.255707 |          |
| 252939_at | Ak4g39230 | NAD(P)H oxidoreductase, isoflavone n isoflavone reductase, putative                   | 56   | 71   | 75   | 96   | 93   | 88   | 68   | 93   | 0.73     | 0.014806  | 81   | 92   | 102  | 160  | 108  | 96   | 111  | 110  | 91       | 117  | 0.78     | 0.148795 | 121      | 0.75     | 0.220400 |          |
| 252940_at | Ak4g39270 | receptor protein kinase - like protein re leucine-rich repeat transmembrane prot      | 39   | 38   | 41   | 59   | 63   | 45   | 40   | 55   | 0.71     | 0.046832  | 41   | 37   | 46   | 53   | 45   | 45   | 47   | 49   | 53       | 42   | 0.94     | 0.036555 | 48       | 0.87     | 0.139032 |          |
| 252941_at | Ak4g39280 | chenvialam-trna synthetase - like rod orshervialam-trna synthetase, putative          | 545  | 654  | 657  | 769  | 827  | 680  | 619  | 758  | 0.82     | 0.089537  | 576  | 501  | 637  | 842  | 719  | 617  | 672  | 657  | 701      | 701  | 0.81     | 0.069872 | 726      | 0.79     | 0.110973 |          |
| 252942_at | Ak4g39300 | autative protein - supported by full-len expressed protein                            | 395  | 503  | 461  | 536  | 574  | 457  | 453  | 522  | 0.87     | 0.213753  | 566  | 588  | 565  | 871  | 657  | 667  | 622  | 565  | 573      | 677  | 0.85     | 0.184435 | 732      | 0.78     | 0.085135 |          |
| 252943_at | Ak4g39330 | aminol-alcohol dehydrogenase CAD' mannitol dehydrogenase, putative                    | 2938 | 3359 | 3273 | 4361 | 4668 | 3651 | 3190 | 4227 | 0.75     | 0.034031  | 3323 | 3018 | 3430 | 4407 | 3775 | 3401 | 3423 | 3676 | 3257     | 3696 | 0.88     | 0.153003 | 3861     | 0.84     | 0.130541 |          |
| 252944_at | Ak4g39320 | hypothetical protein - supported by full- microtubule-associated protein-related      | 25   | 27   | 35   | 44   | 40   | 31   | 29   | 38   | 0.75     | 0.113061  | 21   | 25   | 29   | 30   | 22   | 36   | 22   | 25   | 26       | 28   | 0.95     | 0.738062 | 25       | 1.01     | 0.954658 |          |
| 252945_at | Ak4g39140 | putative protein - supported by full-len expressed protein                            | 91   | 100  | 99   | 113  | 114  | 92   | 97   | 107  | 0.91     | 0.278006  | 76   | 64   | 89   | 90   | 90   | 89   | 73   | 85   | 77       | 85   | 0.90     | 0.255157 | 89       | 0.86     | 0.152059 |          |
| 252946_at | Ak4g39235 | Expressed protein - supported by full-le expressed protein                            | 169  | 212  | 211  | 227  | 272  | 204  | 197  | 234  | 0.84     | 0.206592  | 183  | 170  | 206  | 272  | 182  | 205  | 211  | 204  | 186      | 215  | 0.87     | 0.236601 | 219      | 0.85     | 0.318120 |          |
| 252912_at | Ak4g39200 | ribosomal protein S25 ribosomal core 40S ribosomal protein S25 (RPS25B) ///           | 3827 | 4425 | 4500 | 4575 | 4918 | 4312 | 4250 | 4602 | 0.92     | 0.271646  | 4008 | 3875 | 4111 | 4680 | 4361 | 3727 | 4890 | 4704 | 3998     | 4473 | 0.89     | 0.137993 | 4256     | 0.94     | 0.420523 |          |
| 252913_at | Ak4g39220 | AlRer1A - supported by full-length cDN RER1A protein                                  | 683  | 678  | 844  | 879  | 881  | 800  | 735  | 853  | 0.86     | 0.126557  | 652  | 824  | 800  | 1110 | 809  | 749  | 758  | 861  | 888      | 0.88 | 0.316159 | 890      | 0.85     | 0.349623 |          |          |
| 252914_at | Ak4g39130 | autative protein deltron. Glivine mac dehydrin family protein                         | 18   | 18   | 20   | 22   | 21   | 22   | 19   | 22   | 0.87     | 0.058349  | 8    | 12   | 14   | 10   | 11   | 12   | 11   | 15   | 11       | 12   | 0.92     | 0.614692 | 11       | 1.00     | 0.979216 |          |
| 252884_at | Ak4g39170 | SEC14 - like protein phosphatidylinositol SEC14 cytosolic factor, putative / phos     | 355  | 441  | 407  | 661  | 675  | 545  | 401  | 627  | 0.64     | 0.009234  | 453  | 361  | 511  | 743  | 585  | 493  | 521  | 533  | 442      | 575  | 0.77     | 0.095387 | 607      | 0.73     | 0.125641 |          |
| 252885_at | Ak4g39260 | glycine-rich protein (clone AIGRP8) - a glycine-rich protein (clone AIGRP8) : su      | 1598 | 1906 | 2608 | 1795 | 2861 | 2177 | 2037 | 2278 | 0.89     | 0.067810  | 3163 | 2991 | 2258 | 2533 | 2572 | 2418 | 3650 | 3478 | 2804     | 2930 | 0.96     | 0.765515 | 2508     | 1.12     | 0.351031 |          |
| 252886_at | Ak4g39350 | su cellulose synthase catalytic subunit (At cellulose synthase, catalytic subunit (At | 156  | 189  | 262  | 208  | 193  | 167  | 203  | 189  | 1.07     | 0.715034  | 160  | 147  | 181  | 189  | 152  | 132  | 172  | 168  | 163      | 163  | 1.00     | 0.992874 | 158      | 1.03     | 0.813378 |          |
| 252887_at | Ak4g39240 | autative protein various predicted prot kelp repeat-containing F-box family pro       | 521  | 676  | 656  | 836  | 976  | 736  | 618  | 849  | 0.73     | 0.052552  | 561  | 632  | 641  | 948  | 728  | 654  | 742  | 680  | 612      | 750  | 0.81     | 0.105015 | 777      | 0.79     | 0.146883 |          |
| 252888_at | Ak4g39210 | glucose-1-phosphate adenyltransferase glucose-1-phosphate adenyltransferase           | 107  | 133  | 171  | 231  | 233  | 203  | 137  | 222  | 0.82     | 0.015710  | 126  | 98   | 126  | 176  | 156  | 109  | 132  | 122  | 116      | 135  | 0.86     | 0.029774 | 140      | 0.83     | 0.328677 |          |
| 252889_at | Ak4g39380 | hypothetical protein - supported by full-len expressed protein                        | 77   | 92   | 110  | 105  | 87   | 100  | 87   | 100  | 0.92     | 0.203639  | 73   | 55   | 75   | 68   | 67   | 68   | 68   | 103  | 69       | 103  | 0.87     | 0.69119  | 66       | 1.05     | 0.905047 |          |
| 252890_at | Ak4g39400 | brassinosteroid insensitive 1 gene (BR1) brassinosteroid insensitive 1 (BR1)          | 808  | 899  | 1036 | 1241 | 1433 | 1017 | 914  | 1230 | 0.74     | 0.082203  | 852  | 685  | 884  | 1160 | 956  | 887  | 1137 | 1109 | 807      | 1050 | 0.77     | 0.028854 | 1001     | 0.81     | 0.131039 |          |
| 252891_at | Ak4g39410 | putative WRKY DNA-binding protein D WRKY family transcription factor                  | 18   | 25   | 22   | 24   | 25   | 24   | 22   | 25   | 0.88     | 0.166179  | 20   | 23   | 23   | 25   | 19   | 18   | 24   | 19   | 22       | 21   | 1.05     | 0.643980 | 20       | 1.07     | 0.570736 |          |
| 252892_at | Ak4g39420 | hypothetical protein - supported by full-len expressed protein                        | 33   | 27   | 38   | 43   | 43   | 41   | 33   | 42   | 0.77     | 0.034917  | 21   | 23   | 26   | 26   | 23   | 22   | 26   | 23   | 23       | 23   | 0.98     | 0.763633 | 23       | 1.00     | 0.997972 |          |
| 252893_at | Ak4g39430 | hypothetical protein - supported by full-len expressed protein                        | 41   | 38   | 68   | 53   | 66   | 50   | 49   | 53   | 0.93     | 0.53      | 68   | 50   | 28   | 39   | 24   | 29   | 30   | 37   | 0.838465 | 28   | 0.97     | 0.838465 | 28       | 0.91     | 0.905047 |          |
| 252894_at | Ak4g39440 | hypothetical protein - supported by full-len expressed protein                        | 43   | 61   | 66   | 59   | 71   | 57   | 57   | 57   | 0.62     | 0.92      | 57   | 40   | 48   | 44   | 39   | 42   | 39   | 41   | 44       | 41   | 1.07     | 0.267797 | 42       | 1.05     | 0.525778 |          |
| 252895_at | Ak4g39450 | hypothetical protein - supported by full-len expressed protein                        | 179  | 262  | 291  | 268  | 285  | 218  | 244  | 257  | 0.95     | 0.765276  | 123  | 155  | 186  | 171  | 134  | 115  | 206  | 187  | 155      | 163  | 0.95     | 0.768901 | 140      | 1.11     | 0.583272 |          |
| 252896_at | Ak4g39480 | cytochrome P450 - like protein cytochr cytochrome P450 family protein                 | 28   | 48   | 46   | 58   | 62   | 47   | 41   | 56   | 0.73     | 0.123832  | 34   | 40   | 36   | 59   | 37   | 47   | 43   | 49   | 37       | 47   | 0.78     | 0.079285 | 47       | 0.77     | 0.170407 |          |
| 252897_at | Ak4g39490 | cytochrome P450 - like protein cytochr cytochrome P450 family protein                 | 48   | 64   | 74   | 17   | 103  | 89   | 20   | 82   | 1.00     | 0.336014  | 130  | 153  | 169  | 17   | 21   | 18   | 14   | 14   | 134      | 18   | 7.53     | 0.000001 | 19       | 7.10     | 0.000122 |          |
| 252898_at | Ak4g39500 | cytochrome P450 - like protein similar: cytochrome P450, putative                     | 12   | 13   | 17   | 17   | 19   | 17   | 14   | 18   | 0.80     | 0.099020  | 17   | 14   | 18   | 14   | 13   | 12   | 20   | 16   | 16       | 15   | 1.00     | 0.553430 | 13       | 1.28     | 0.072707 |          |
| 252899_at | Ak4g39530 | autative protein leaf protein. Ibomoea r pentatricloptide (PPR) repeat-containi       | 43   | 47   | 52   | 55   | 60   | 48   | 48   | 54   | 0.87     | 0.194009  | 31   | 34   | 38   | 40   | 33   | 31   | 37   | 39   | 34       | 36   | 0.96     | 0.637722 | 35       | 1.00     | 0.977843 |          |
| 252900_at | Ak4g39540 | shikimate kinase - like protein shikimat shikimate kinase family protein              | 123  | 191  | 175  | 208  | 202  | 159  | 163  | 190  | 0.86     | 0.353041  | 165  | 202  | 190  | 277  | 199  | 179  | 177  | 158  | 186      | 198  | 0.94     | 0.686770 | 218      | 0.85     | 0.363620 |          |
| 252901_at | Ak4g39550 | autative protein various predicted prot kelp repeat-containing F-box family pro       | 234  | 268  | 368  | 322  | 404  | 303  | 309  | 343  | 0.80     | 0.158380  | 335  | 327  | 343  | 487  | 382  | 410  | 428  | 420  | 335      | 427  | 0.78     | 0.100501 | 429      | 0.78     | 0.033261 |          |
| 252902_at | Ak4g39560 | autative protein various predicted prot kelp repeat-containing F-box family pro       | 318  | 363  | 363  | 329  | 363  | 329  | 363  | 329  | 0.86     | 0.380034  | 24   | 384  | 289  | 346  | 289  | 374  | 308  | 312  | 289      | 312  | 0.79     | 0.048984 | 293      | 0.84     | 0.077110 |          |
| 252903_at | Ak4g39570 | putative protein various predicted prot kelp repeat-containing F-box family pro       | 214  | 266  | 397  | 461  | 524  | 398  | 359  | 461  | 0.78     | 0.080246  | 339  | 360  | 353  | 494  | 418  | 373  | 429  | 419  | 351      | 427  | 0.82     | 0.027712 | 428      | 0.82     | 0.096162 |          |
| 252904_at | Ak4g39620 | autative protein crp1 protein. Zea may pseudotricloptide (PPR) repeat-containi        | 59   | 165  | 136  | 157  | 174  | 125  | 133  | 152  | 0.88     | 0.475072  | 128  | 137  | 142  | 208  | 157  | 155  | 160  | 155  | 136      | 167  | 0.81     | 0.067608 | 173      | 0.78     | 0.102874 |          |
| 252905_at | Ak4g39720 | putative protein predicted protein. Arabi autative protein predicted protein. Arabi   | 51   | 68   | 89   | 80   | 91   | 82   | 69   | 84   | 0.82     | 0.260093  | 74   | 75   | 83   | 77   | 65   | 73   | 85   | 83   | 77       | 77   | 1.01     | 0.904965 | 72       | 1.06     | 0.260274 |          |
| 252906_at | Ak4g39640 | autative gamma-glutamyltransferase o gamma-glutamyltransferase family o               | 143  | 147  | 179  | 165  | 105  | 89   | 122  | 105  | 1.45     | 0.03261   |      |      |      |      |      |      |      |      |          |      |          |          |          |          |          |          |

|             |          |                                                                                        |     |     |     |     |      |     |     |      |          |          |     |     |     |      |     |     |     |      |          |     |          |          |          |      |          |          |
|-------------|----------|----------------------------------------------------------------------------------------|-----|-----|-----|-----|------|-----|-----|------|----------|----------|-----|-----|-----|------|-----|-----|-----|------|----------|-----|----------|----------|----------|------|----------|----------|
| 252832_at   | A4g39910 | ubiquitin-specific protease 3 (UBP3) id: ubiquitin-specific protease 3 (UBP3)          | 294 | 390 | 387 | 388 | 434  | 326 | 357 | 383  | 0.93     | 0.592739 | 242 | 211 | 225 | 285  | 246 | 230 | 299 | 291  | 226      | 270 | 0.84     | 0.060400 | 254      | 0.89 | 0.209155 |          |
| 252833_at   | A4g40090 | Expressed protein : supported by cDNV arabinogalactan-protein (AGP3)                   | 25  | 26  | 35  | 37  | 38   | 31  | 29  | 35   | 0.82     | 0.160862 | 27  | 37  | 39  | 32   | 31  | 30  | 35  | 36   | 34       | 33  | 1.05     | 0.630676 | 31       | 1.11 | 0.428436 |          |
| 252834_at   | A4g40070 | autative protein RING-H2 zinc finger or expressed protein                              | 41  | 52  | 70  | 51  | 59   | 53  | 54  | 54   | 1.00     | 0.999598 | 35  | 36  | 42  | 47   | 42  | 38  | 45  | 47   | 38       | 44  | 0.87     | 0.087996 | 42       | 0.90 | 0.238864 |          |
| 252835_at   | A4g40060 | autative protein several hypothetical on myosin heavy chain-related                    | 29  | 28  | 31  | 32  | 32   | 29  | 34  | 0.86 | 0.101464 | 28       | 33  | 26  | 24  | 23   | 26  | 30  | 24  | 26   | 26       | 30  | 1.03     | 0.056510 | 29       | 0.88 | 0.155931 |          |
| 252836_at   | A4g42070 | autative protein predicted polioviruses - hypothetical protein                         | 21  | 21  | 24  | 31  | 24   | 24  | 22  | 26   | 0.85     | 0.175379 | 23  | 17  | 20  | 20   | 18  | 20  | 21  | 20   | 20       | 20  | 1.01     | 0.865313 | 19       | 1.04 | 0.725011 |          |
| 252837_at   | A3g42080 | putative protein hypothetical proteins - , hypothetical protein                        | 7   | 7   | 10  | 6   | 9    | 9   | 8   | 8    | 0.99     | 0.935557 | 6   | 5   | 7   | 5    | 3   | 7   | 10  | 5    | 6        | 7   | 0.85     | 0.468626 | 7        | 0.88 | 0.408065 |          |
| 252838_at   | A3g42090 | hypothetical protein                                                                   | 7   | 2   | 2   | 0   | 1    | 6   | 3   | 3    | 1.35     | 0.728674 | 2   | 5   | 5   | 2    | 3   | 3   | 5   | 3    | 4        | 3   | 1.39     | 0.295046 | 2        | 1.74 | 0.198499 |          |
| 252839_at   | A4g42100 | autative protein AT hook motif-containing protein-related                              | 23  | 23  | 20  | 21  | 21   | 23  | 23  | 23   | 0.52     | 0.337727 | 22  | 27  | 22  | 23   | 22  | 20  | 23  | 23   | 20       | 23  | 0.731821 | 1.01     | 0.368690 | 23   | 0.68     | 0.656269 |
| 252840_at   | A3g42630 | autative protein various predicted helix AT hook motif-containing protein-related      | 15  | 13  | 18  | 18  | 16   | 12  | 15  | 15   | 1.00     | 0.994897 | 12  | 14  | 15  | 18   | 12  | 13  | 16  | 16   | 14       | 15  | 0.91     | 0.429932 | 15       | 0.94 | 0.715458 |          |
| 252841_at   | A3g42110 | autative protein replication protein A 5' -hypothetical protein /// pseudogene, hvo    | 23  | 26  | 26  | 28  | 29   | 26  | 25  | 27   | 0.91     | 0.167896 | 16  | 15  | 21  | 21   | 16  | 13  | 22  | 21   | 17       | 19  | 0.94     | 0.673252 | 17       | 1.04 | 0.842932 |          |
| 252842_at   | A3g42120 | autative protein hypothetical proteins - , pseudogene, .hypothetical protein /// hvo   | 7   | 7   | 9   | 10  | 10   | 9   | 7   | 10   | 0.78     | 0.159903 | 7   | 7   | 8   | 3    | 6   | 8   | 11  | 6    | 7        | 7   | 1.11     | 0.681524 | 6        | 1.31 | 0.241855 |          |
| 252843_at   | A3g42130 | olive-rich protein other olive-rich or glycine-rich protein                            | 5   | 20  | 35  | 25  | 22   | 40  | 28  | 29   | 0.85     | 0.856212 | 11  | 13  | 20  | 14   | 10  | 13  | 16  | 14   | 14       | 13  | 1.09     | 0.681104 | 12       | 0.98 | 0.521079 |          |
| 252844_at   | A3g42140 | autative protein several hypothetical on hypothetical protein                          | 45  | 65  | 85  | 78  | 80   | 75  | 65  | 78   | 0.83     | 0.325284 | 44  | 38  | 58  | 54   | 40  | 37  | 54  | 67   | 47       | 52  | 0.89     | 0.474345 | 47       | 0.89 | 0.959333 |          |
| 252845_at   | A3g42050 | vacuolar H(+)-ATPase subunit-like pro vacuolar ATP synthase subunit H family           | 676 | 833 | 821 | 942 | 1009 | 793 | 777 | 915  | 0.85     | 0.166218 | 791 | 666 | 796 | 1033 | 906 | 791 | 861 | 817  | 751      | 882 | 0.85     | 0.090143 | 910      | 0.83 | 0.123949 |          |
| 252846_at   | A3g42160 | autative protein several pectin methyl-esterase-related                                | 8   | 6   | 6   | 8   | 7    | 6   | 7   | 7    | 0.98     | 0.872096 | 8   | 9   | 14  | 7    | 6   | 2   | 6   | 5    | 10       | 5   | 1.93     | 0.031222 | 5        | 2.02 | 0.095283 |          |
| 252847_at   | A3g42170 | autative transposase hypothetical protein hobo/Act/Tc                                  | 541 | 672 | 647 | 720 | 801  | 598 | 620 | 706  | 0.88     | 0.253746 | 406 | 377 | 417 | 537  | 449 | 371 | 522 | 499  | 400      | 476 | 0.84     | 0.115736 | 452      | 0.88 | 0.349924 |          |
| 252848_at   | A3g42180 | hypothetical protein - supported by full-expressed protein /// expressed protein       | 27  | 26  | 38  | 34  | 33   | 35  | 30  | 34   | 0.90     | 0.433209 | 20  | 14  | 20  | 22   | 21  | 22  | 26  | 19   | 18       | 22  | 0.82     | 0.090971 | 22       | 0.83 | 0.129743 |          |
| 252789_s_at | A3g42190 | hypothetical protein                                                                   | 421 | 515 | 508 | 520 | 579  | 462 | 481 | 520  | 0.93     | 0.440239 | 529 | 559 | 593 | 804  | 656 | 627 | 594 | 560  | 650      | 656 | 0.85     | 0.119981 | 687      | 0.82 | 0.116967 |          |
| 252790_at   | A3g42210 | autative protein various predicted trans CACTA-like transposase family (Tnp2/E         | 8   | 12  | 10  | 13  | 12   | 12  | 10  | 13   | 0.80     | 0.059839 | 9   | 8   | 8   | 9    | 11  | 13  | 9   | 15   | 9        | 11  | 0.76     | 0.150228 | 11       | 0.78 | 0.124176 |          |
| 252791_at   | A3g42220 | transposase - like protein putative trans CACTA-like transposase family (Tnp2/E        | 14  | 15  | 16  | 10  | 22   | 16  | 15  | 16   | 0.97     | 0.908040 | 13  | 13  | 15  | 19   | 16  | 16  | 19  | 15   | 13       | 17  | 0.79     | 0.028306 | 17       | 0.79 | 0.039467 |          |
| 252792_at   | A3g42240 | hypothetical protein                                                                   | 28  | 29  | 29  | 33  | 32   | 29  | 31  | 0.92 | 0.115363 | 26       | 25  | 24  | 27  | 25   | 23  | 25  | 26  | 25   | 26       | 26  | 0.99     | 0.816980 | 25       | 1.00 | 0.981457 |          |
| 252793_at   | A3g42250 | hypothetical protein                                                                   | 6   | 3   | 0   | 1   | 2    | 1   | 3   | 1    | 2.32     | 0.338916 | 4   | 5   | 3   | 4    | 4   | 2   | 4   | 3    | 3        | 3   | 1.15     | 0.490183 | 3        | 1.13 | 0.631237 |          |
| 252794_at   | A3g42260 | autative protein predicted proteins. Ara ovary-like retrotransposon family (Athila     | 6   | 21  | 24  | 25  | 26   | 22  | 20  | 24   | 0.84     | 0.257295 | 17  | 17  | 22  | 18   | 16  | 15  | 23  | 19   | 19       | 18  | 1.02     | 0.859259 | 16       | 1.14 | 0.282425 |          |
| 252795_at   | A3g42270 | autative protein predicted proteins. Ara ovary-like retrotransposon family (Athila     | 17  | 18  | 19  | 16  | 18   | 20  | 18  | 18   | 1.00     | 0.995281 | 13  | 15  | 17  | 12   | 16  | 15  | 20  | 17   | 15       | 16  | 0.95     | 0.682110 | 14       | 1.05 | 0.676646 |          |
| 252796_at   | A3g42280 | autative protein predicted proteins. Ara retrotransposon family                        | 10  | 14  | 17  | 18  | 16   | 15  | 14  | 16   | 0.84     | 0.248923 | 17  | 18  | 17  | 10   | 12  | 13  | 13  | 17   | 17       | 13  | 1.33     | 0.035820 | 12       | 1.48 | 0.008011 |          |
| 252797_at   | A3g42300 | putative protein                                                                       | 47  | 65  | 91  | 74  | 85   | 83  | 68  | 80   | 0.84     | 0.319134 | 46  | 51  | 55  | 54   | 47  | 38  | 83  | 59   | 51       | 56  | 0.91     | 0.631147 | 46       | 1.10 | 0.420538 |          |
| 252798_at   | A3g42310 | putative protein                                                                       | 23  | 29  | 32  | 38  | 45   | 32  | 28  | 38   | 0.73     | 0.098522 | 21  | 18  | 22  | 26   | 25  | 14  | 24  | 24   | 20       | 22  | 0.90     | 0.497226 | 21       | 0.95 | 0.812176 |          |
| 252799_at   | A3g42320 | autative protein various predicted Helix hypothetical protein                          | 12  | 10  | 8   | 6   | 14   | 10  | 10  | 10   | 0.99     | 0.977714 | 10  | 12  | 7   | 11   | 8   | 10  | 13  | 10   | 9        | 10  | 0.91     | 0.586777 | 10       | 0.98 | 0.912491 |          |
| 252800_at   | A3g42330 | putative protein                                                                       | 39  | 53  | 73  | 55  | 72   | 66  | 55  | 64   | 0.86     | 0.450550 | 29  | 34  | 34  | 29   | 31  | 29  | 31  | 36   | 32       | 31  | 1.03     | 0.682589 | 30       | 1.08 | 0.237444 |          |
| 252801_at   | A3g42340 | autative protein various predicted Helix hypothetical protein - helicase-related       | 12  | 15  | 16  | 18  | 15   | 11  | 12  | 12   | 0.95     | 0.344463 | 11  | 12  | 15  | 12   | 15  | 13  | 12  | 15   | 12       | 12  | 0.95     | 0.716351 | 12       | 0.93 | 0.689259 |          |
| 252802_at   | A3g42350 | putative protein                                                                       | 9   | 11  | 16  | 11  | 15   | 11  | 12  | 12   | 0.95     | 0.803028 | 8   | 8   | 8   | 5    | 5   | 7   | 6   | 8    | 7        | 6   | 1.13     | 0.419811 | 6        | 1.25 | 0.235027 |          |
| 252803_at   | A3g42360 | putative protein various predicted prot pseudogene, similar to Putative 22 kDa         | 15  | 19  | 22  | 19  | 19   | 24  | 19  | 21   | 0.91     | 0.544526 | 17  | 23  | 26  | 18   | 22  | 18  | 22  | 20   | 22       | 20  | 1.10     | 0.453517 | 19       | 1.13 | 0.469776 |          |
| 252804_at   | A3g42370 | putative protein                                                                       | 11  | 12  | 10  | 14  | 11   | 15  | 11  | 13   | 0.83     | 0.126703 | 8   | 8   | 10  | 9    | 7   | 10  | 14  | 10   | 9        | 10  | 0.84     | 0.312735 | 9        | 0.97 | 0.776071 |          |
| 252805_at   | A3g42380 | autative protein several hypothetical on pseudogene, hypothetical protein              | 19  | 25  | 21  | 30  | 36   | 26  | 19  | 25   | 0.91     | 0.006062 | 36  | 18  | 19  | 24   | 15  | 22  | 29  | 24   | 19       | 23  | 0.83     | 0.242893 | 24       | 0.93 | 0.635065 |          |
| 252806_at   | A3g42390 | putative protein                                                                       | 22  | 20  | 29  | 26  | 31   | 34  | 23  | 30   | 0.77     | 0.123671 | 16  | 17  | 23  | 17   | 15  | 18  | 18  | 18   | 19       | 17  | 1.08     | 0.460957 | 17       | 1.10 | 0.483267 |          |
| 252807_at   | A3g42400 | autative replication protein various are hypothetical protein                          | 15  | 14  | 21  | 21  | 23   | 17  | 21  | 0.80 | 0.155396 | 10       | 13  | 15  | 15  | 11   | 8   | 12  | 13  | 13   | 12       | 12  | 1.08     | 0.605338 | 12       | 1.11 | 0.632455 |          |
| 252808_at   | A3g42420 | putative protein various predicted prot pseudogene, similar to putative helicase       | 15  | 14  | 17  | 21  | 14   | 18  | 15  | 17   | 0.88     | 0.414444 | 16  | 17  | 13  | 16   | 11  | 15  | 17  | 18   | 15       | 15  | 0.99     | 0.944746 | 14       | 1.09 | 0.523840 |          |
| 252809_at   | A3g42430 | autative protein various predicted prot pseudogene, similar to putative helicase       | 7   | 7   | 10  | 7   | 13   | 7   | 10  | 0.76 | 0.101060 | 3        | 7   | 6   | 10  | 9    | 9   | 6   | 12  | 14   | 13       | 13  | 1.26     | 0.634296 | 8        | 1.59 | 0.591656 |          |
| 252810_at   | A3g42440 | autative protein several hypothetical on pseudogene, hypothetical protein /// hvp      | 28  | 29  | 40  | 41  | 40   | 42  | 33  | 41   | 0.79     | 0.090967 | 30  | 37  | 42  | 40   | 31  | 33  | 30  | 30   | 36       | 33  | 1.11     | 0.356743 | 35       | 1.05 | 0.713124 |          |
| 252811_at   | A3g42460 | autative protein several hypothetical on hypothetical protein                          | 26  | 32  | 52  | 48  | 47   | 41  | 36  | 45   | 0.81     | 0.340757 | 20  | 19  | 30  | 27   | 21  | 24  | 30  | 27   | 23       | 26  | 0.89     | 0.417170 | 24       | 0.95 | 0.767372 |          |
| 252812_at   | A3g42480 | autative protein hypothetical proteins - , Mutator-like transposase family /// oseuc   | 13  | 15  | 21  | 24  | 14   | 17  | 16  | 18   | 0.89     | 0.634301 | 18  | 14  | 13  | 17   | 12  | 10  | 12  | 15   | 15       | 13  | 1.17     | 0.322050 | 13       | 1.18 | 0.429787 |          |
| 252813_at   | A3g42500 | autative protein several hypothetical on hypothetical protein /// hypothetical protein | 3   | 4   | 6   | 3   | 7    | 5   | 5   | 5    | 0.86     | 0.688937 | 5   | 6   | 12  | 10   | 6   | 9   | 7   | 1.39 | 0.324729 | 6   | 1.66     | 0.218428 |          |      |          |          |
| 252814_at   | A3g42510 | autative protein several hypothetical on Ulp1 protease family protein                  | 10  | 11  | 12  | 14  | 11   | 12  | 11  | 13   | 0.88     | 0.192086 | 10  | 12  | 13  | 11   | 9   | 7   | 11  | 10   | 11       | 9   | 1.21     | 0.140065 | 8        | 1.20 | 0.153589 |          |
| 252815_at   | A3g42540 | hypothetical protein                                                                   | 23  | 30  | 31  | 34  | 28   | 28  | 31  | 0.89 | 0.312004 | 23       | 24  | 24  | 27  | 23   | 18  | 19  | 18  | 24   | 21       | 21  | 1.14     | 0.261228 | 23       | 1.07 | 0.623736 |          |
| 252816_at   | A3g42550 | putative protein several putative protein aspartyl protease family protein             | 24  | 22  | 33  | 31  | 33   | 33  | 26  | 32   | 0.81     | 0.148053 | 24  | 30  | 31  | 31   | 28  | 23  | 32  | 27   | 28       | 28  | 1.01     | 0.921162 | 27       | 1.04 | 0.714320 |          |
| 252817_at   | A3g42580 | autative protein hypothetical proteins - , Ulp1 protease family protein                | 18  | 15  | 20  | 18  | 19   | 18  | 19  | 18   | 0.94     | 0.470918 | 15  | 17  | 14  | 16   | 13  | 11  | 20  | 15   | 15       | 15  | 1.01     | 0.925823 | 13       | 1.14 | 0.337881 |          |
| 252818_at   | A3g42590 | autative protein several hypothetical on pseudogene, hypothetical protein /// hvo      | 24  | 24  | 49  | 47  | 45   | 46  | 45  | 55   | 0.84     | 0.257295 | 37  | 41  | 48  | 38   | 47  | 40  | 46  | 40   | 46       | 43  | 0.87     | 0.324729 | 32       | 0.93 | 0.687722 |          |
| 252819_at   | A3g42600 | autative protein several hypothetical on hypothetical protein                          | 19  | 15  | 15  | 15  | 21   | 15  | 16  | 17   | 0.97     | 0.863461 | 13  | 23  | 14  | 15   | 9   | 14  | 14  | 12   | 17       | 13  | 1.30     | 0.179983 | 13       | 1.32 | 0.305328 |          |
| 252820_at   | A3g42640 | plasma membrane H(+)-ATPase-like prc ATPase, plasma membrane-type, putati              | 213 | 204 | 229 | 189 | 258  | 123 | 215 | 190  | 1.13     | 0.562857 | 110 | 106 | 103 | 171  | 124 | 108 | 136 | 138  | 106      | 135 | 0.78     | 0.079686 | 134      | 0.79 | 0.209817 |          |
| 252785_at   | A3g42660 | autative protein AND-1 protein - Homo transducin family protein / WD-40 repeat         | 227 | 275 | 253 | 316 | 320  | 262 | 252 | 299  | 0.84     | 0.107625 | 202 | 177 | 221 | 264  | 237 | 203 | 204 | 192  | 200      | 220 | 0.91     | 0.344405 | 235      | 0.85 | 0.181361 |          |
| 252786_at   | A3g42670 | autative protein putative DNA-H2ase TGF2 domain-containing protein / helica            | 45  | 57  | 64  | 68  | 62   | 64  |     |      |          |          |     |     |     |      |     |     |     |      |          |     |          |          |          |      |          |          |

|             |           |                                                                                         |      |      |      |      |      |      |      |      |          |          |          |      |      |      |      |      |      |      |      |      |          |          |          |          |          |          |
|-------------|-----------|-----------------------------------------------------------------------------------------|------|------|------|------|------|------|------|------|----------|----------|----------|------|------|------|------|------|------|------|------|------|----------|----------|----------|----------|----------|----------|
| 252742_at   | A13g33290 | putative protein dyceraldehyde-3-phospho-hypothetical protein                           | 43   | 51   | 58   | 51   | 66   | 51   | 51   | 56   | 0.90     | 0.450704 | 51       | 49   | 63   | 40   | 37   | 46   | 44   | 54   | 41   | 1.31 | 0.015719 | 39       | 1.39     | 0.025264 |          |          |
| 252743_at   | A13g33300 | quinane nucleotide-exchange - like prc quinane nucleotide exchange family prot          | 542  | 631  | 680  | 624  | 759  | 522  | 617  | 635  | 0.97     | 0.834008 | 565      | 429  | 542  | 632  | 585  | 469  | 647  | 636  | 512  | 594  | 0.86     | 0.175948 | 562      | 0.91     | 0.475561 |          |
| 252744_at   | A13g33310 | putative protein hvchothetical protein At pseudogene, hvchothetical protein             | 11   | 12   | 16   | 13   | 13   | 14   | 13   | 13   | 1.00     | 0.995634 | 10       | 12   | 12   | 9    | 10   | 7    | 8    | 10   | 11   | 9    | 1.22     | 0.084120 | 9        | 1.22     | 0.168235 |          |
| 252745_at   | A13g33320 | putative protein zinc finger FYVE-type family protein                                   | 323  | 317  | 339  | 369  | 285  | 328  | 338  | 0.86 | 0.371890 | 267      | 254      | 275  | 468  | 325  | 320  | 342  | 345  | 342  | 342  | 342  | 0.77     | 0.035915 | 344      | 0.77     | 0.029114 |          |
| 252746_at   | A13g33190 | sucrose synthase -like protein SUCRO sucrose synthase, putative / sucrose-UC            | 19   | 19   | 23   | 24   | 22   | 19   | 21   | 22   | 0.94     | 0.588446 | 12       | 13   | 66   | 15   | 15   | 15   | 13   | 16   | 30   | 15   | 2.03     | 0.285870 | 15       | 2.03     | 0.441372 |          |
| 252747_at   | A13g33320 | putative protein hvchothetical protein hvchothetical protein                            | 53   | 63   | 75   | 64   | 70   | 70   | 63   | 68   | 0.93     | 0.547162 | 37       | 51   | 50   | 40   | 43   | 40   | 56   | 47   | 46   | 45   | 1.01     | 0.940206 | 41       | 1.12     | 0.366451 |          |
| 252748_at   | A13g33330 | putative protein putative proteins - Arat hvchothetical protein /// hvchothetical prot  | 6    | 2    | 3    | 2    | 7    | 4    | 4    | 4    | 0.92     | 0.860017 | 7        | 2    | 3    | 5    | 6    | 3    | 6    | 5    | 4    | 5    | 0.79     | 0.474128 | 5        | 0.83     | 0.688220 |          |
| 252749_at   | A13g33390 | putative protein hvchothetical protein hvchothetical protein /// pseudogene, hyp        | 19   | 15   | 16   | 16   | 20   | 20   | 20   | 0.89 | 0.455066 | 12       | 19       | 43   | 30   | 11   | 12   | 11   | 13   | 12   | 13   | 12   | 2.08     | 0.15084  | 11       | 2.34     | 0.109189 |          |
| 252750_at   | A13g33420 | putative protein hvchothetical protein c2 hvchothetical protein                         | 8    | 11   | 9    | 9    | 14   | 10   | 9    | 11   | 0.85     | 0.364061 | 8        | 10   | 10   | 12   | 15   | 12   | 10   | 6    | 9    | 11   | 0.85     | 0.442279 | 13       | 0.73     | 0.027089 |          |
| 252751_at   | A13g33430 | outative protein RING-H2 zinc finger c1 zinc finger (C3HC4-type RING finger) fa         | 40   | 55   | 63   | 54   | 52   | 59   | 53   | 55   | 0.95     | 0.720027 | 38       | 38   | 42   | 48   | 43   | 41   | 48   | 49   | 39   | 46   | 0.85     | 0.024363 | 44       | 0.89     | 0.096120 |          |
| 252752_s_at | A13g33480 | outative protein hvchothetical protein At zinc knuckle (CCHC-type) family protein       | 20   | 20   | 18   | 24   | 19   | 20   | 20   | 21   | 0.95     | 0.590415 | 15       | 18   | 19   | 18   | 19   | 18   | 13   | 20   | 16   | 17   | 1.07     | 0.558137 | 15       | 1.17     | 0.230386 |          |
| 252753_at   | A13g33480 | hypothetical protein predicted transpos CACTA-like transposase family (PtaEn            | 64   | 81   | 85   | 19   | 22   | 19   | 20   | 20   | 1.00     | 0.002002 | 122      | 124  | 148  | 20   | 20   | 20   | 131  | 20   | 131  | 20   | 6.57     | 0.000002 | 18       | 7.09     | 0.000169 |          |
| 252754_at   | A13g33510 | putative protein hvchothetical protein re-copia-like retrotransposon family             | 247  | 315  | 328  | 386  | 434  | 331  | 207  | 384  | 0.77     | 0.096707 | 266      | 250  | 307  | 407  | 371  | 365  | 281  | 307  | 274  | 364  | 0.75     | 0.122003 | 411      | 0.67     | 0.041225 |          |
| 252755_at   | A13g33530 | putative protein hvchothetical proteins - hvchothetical protein /// hvchothetical prot  | 9    | 7    | 12   | 9    | 7    | 10   | 9    | 9    | 1.07     | 0.715297 | 7        | 8    | 6    | 8    | 7    | 7    | 7    | 7    | 5    | 7    | 0.97     | 0.782996 | 8        | 0.90     | 0.259992 |          |
| 252756_s_at | A13g33550 | putative protein hvchothetical proteins - GDSL-motif lipase, putative /// GDSL-mc       | 23   | 20   | 23   | 24   | 24   | 24   | 22   | 24   | 0.92     | 0.129673 | 15       | 17   | 19   | 17   | 14   | 15   | 19   | 23   | 17   | 17   | 0.98     | 0.862927 | 15       | 1.13     | 0.232228 |          |
| 252722_at   | A13g33560 | outative protein hvchothetical protein F1 ovns-ike retrotransposon family (Atila        | 14   | 14   | 15   | 14   | 20   | 16   | 15   | 17   | 0.90     | 0.359974 | 10       | 11   | 14   | 13   | 11   | 13   | 12   | 15   | 12   | 13   | 0.90     | 0.378274 | 12       | 0.95     | 0.682229 |          |
| 252721_at   | A13g33520 | hypothetical protein - supported by full-expressed protein                              | 741  | 897  | 803  | 1001 | 1137 | 926  | 814  | 1051 | 0.77     | 0.035846 | 868      | 899  | 951  | 1292 | 1065 | 985  | 1119 | 1041 | 906  | 1106 | 0.82     | 0.031075 | 1124     | 0.81     | 0.070660 |          |
| 252724_at   | A13g33540 | outative protein hvchothetical protein s1-expressed protein                             | 240  | 354  | 342  | 344  | 394  | 298  | 312  | 345  | 0.90     | 0.501211 | 295      | 345  | 341  | 525  | 377  | 359  | 405  | 388  | 327  | 411  | 0.80     | 0.088287 | 420      | 0.78     | 0.166254 |          |
| 252694_at   | A13g33630 | nodulin -like protein nodulin-21, Glycin nodulin, putative                              | 79   | 112  | 146  | 122  | 127  | 118  | 112  | 122  | 0.92     | 0.629412 | 65       | 63   | 78   | 77   | 69   | 67   | 95   | 75   | 69   | 77   | 0.90     | 0.312257 | 71       | 0.96     | 0.668940 |          |
| 252695_s_at | A13g33640 | hypothetical protein predicted proteins - copia-like retrotransposon family             | 22   | 18   | 30   | 27   | 24   | 19   | 23   | 23   | 1.00     | 0.982422 | 20       | 25   | 29   | 20   | 21   | 20   | 22   | 19   | 25   | 21   | 1.21     | 0.084485 | 21       | 1.21     | 0.189127 |          |
| 252696_at   | A13g33650 | hypothetical protein predicted transpos CACTA-like transposase family (PtaEn            | 9    | 6    | 9    | 7    | 15   | 10   | 12   | 8    | 10       | 0.83     | 0.407291 | 7    | 8    | 11   | 12   | 9    | 8    | 15   | 11   | 9    | 11       | 0.80     | 0.302493 | 10       | 0.91     | 0.637506 |
| 252697_at   | A13g33660 | nodulin -like protein nodulin-21, Glycin nodulin, putative /// nodulin, putative        | 61   | 65   | 80   | 70   | 118  | 75   | 69   | 88   | 0.79     | 0.314277 | 38       | 37   | 55   | 38   | 38   | 42   | 77   | 70   | 43   | 53   | 0.81     | 0.435443 | 40       | 1.09     | 0.592626 |          |
| 252698_at   | A13g33670 | amine oxidase -like protein amine oxid copper amine oxidase, putative                   | 35   | 49   | 47   | 33   | 38   | 35   | 44   | 35   | 1.24     | 0.123582 | 62       | 65   | 50   | 71   | 62   | 59   | 103  | 77   | 59   | 74   | 0.80     | 0.215986 | 64       | 0.92     | 0.454119 |          |
| 252699_at   | A13g33680 | hypothetical protein predicted proteins hvchothetical protein                           | 44   | 53   | 54   | 51   | 44   | 55   | 50   | 50   | 1.00     | 0.988606 | 47       | 53   | 51   | 59   | 63   | 47   | 48   | 69   | 52   | 71   | 0.90     | 0.329466 | 53       | 0.95     | 0.507024 |          |
| 252700_at   | A13g33690 | hypothetical protein envelope-like, Gly copia-like retrotransposon family protein       | 45   | 59   | 67   | 67   | 65   | 78   | 57   | 70   | 0.81     | 0.158875 | 51       | 51   | 59   | 63   | 47   | 48   | 69   | 59   | 54   | 57   | 0.84     | 0.600637 | 52       | 1.02     | 0.836613 |          |
| 252701_at   | A13g33700 | hypothetical protein SPOF protein, Ho specie-type POZ protein-related                   | 101  | 127  | 117  | 127  | 145  | 115  | 115  | 129  | 0.89     | 0.300529 | 94       | 100  | 100  | 133  | 102  | 99   | 134  | 119  | 98   | 117  | 0.84     | 0.099429 | 111      | 0.88     | 0.296590 |          |
| 252702_at   | A13g33730 | putative protein predicted proteins -like pseudogene, similar to ring-infested eryt     | 6    | 3    | 5    | 5    | 9    | 8    | 5    | 7    | 0.61     | 0.124753 | 8        | 11   | 7    | 5    | 8    | 2    | 6    | 7    | 8    | 6    | 1.50     | 0.151179 | 5        | 1.72     | 0.175330 |          |
| 252703_at   | A13g33740 | leucine-rich repeat protein LRP -like re leucine-rich repeat family protein             | 32   | 36   | 48   | 57   | 52   | 55   | 39   | 55   | 0.71     | 0.035248 | 26       | 29   | 39   | 43   | 31   | 27   | 46   | 35   | 31   | 36   | 0.86     | 0.397985 | 34       | 0.93     | 0.734847 |          |
| 252704_at   | A13g33750 | outative protein KIAA0161 gene, Homz zinc finger (C3HC4-type RING finger) fa            | 11   | 13   | 13   | 14   | 18   | 12   | 12   | 15   | 0.83     | 0.281128 | 9        | 9    | 11   | 7    | 11   | 10   | 11   | 9    | 10   | 10   | 1.03     | 0.827245 | 9        | 1.06     | 0.699448 |          |
| 252705_at   | A13g33760 | outative protein hvchothetical protein hvchothetical protein                            | 24   | 32   | 40   | 40   | 40   | 24   | 32   | 30   | 0.85     | 0.354668 | 27       | 30   | 26   | 30   | 27   | 20   | 28   | 27   | 20   | 27   | 1.10     | 0.145601 | 27       | 1.00     | 0.989627 |          |
| 252706_at   | A13g33770 | putative protein predicted proteins, Arat hvchothetical protein                         | 15   | 17   | 20   | 22   | 17   | 19   | 17   | 19   | 0.89     | 0.353028 | 8        | 12   | 19   | 16   | 11   | 13   | 12   | 13   | 13   | 0.98 | 0.932548 | 14       | 0.96     | 0.870017 |          |          |
| 252707_at   | A13g33790 | Arat transporter-like protein multidrug-efflux transporter-related                      | 33   | 51   | 56   | 53   | 61   | 55   | 47   | 56   | 0.83     | 0.253040 | 33       | 32   | 45   | 41   | 30   | 35   | 47   | 37   | 37   | 38   | 0.97     | 0.829994 | 35       | 1.05     | 0.744432 |          |
| 252708_at   | A13g33820 | putative protein amine oxidase, Canav pseudogene, copper amine oxidase prot             | 11   | 11   | 13   | 12   | 15   | 12   | 12   | 13   | 0.92     | 0.384654 | 11       | 14   | 14   | 10   | 11   | 11   | 9    | 13   | 10   | 12   | 0.77     | 0.032140 | 11       | 1.22     | 0.111723 |          |
| 252709_at   | A13g33840 | outative protein hvchothetical proteins, Arat expressed protein                         | 64   | 82   | 90   | 113  | 79   | 81   | 94   | 86   | 0.446130 | 84       | 85       | 99   | 142  | 100  | 97   | 92   | 91   | 89   | 106  | 0.85 | 0.286672 | 113      | 0.79     | 0.198929 |          |          |
| 252710_at   | A13g33860 | cellulase-like protein cellulase, Sambu glycosyl hydrolase family 9 protein             | 19   | 17   | 20   | 14   | 20   | 16   | 19   | 17   | 1.10     | 0.394650 | 15       | 14   | 16   | 18   | 15   | 17   | 12   | 11   | 15   | 15   | 1.04     | 0.755981 | 17       | 0.91     | 0.236375 |          |
| 252711_at   | A13g33720 | liquid-transfer protein-like protein nosco-translocase inhibitor/secd storage/loid tran | 1268 | 1066 | 1119 | 1308 | 1504 | 1289 | 1151 | 1367 | 0.84     | 0.077330 | 1371     | 1474 | 1470 | 2249 | 1591 | 1493 | 1461 | 1440 | 1438 | 1647 | 0.87     | 0.348674 | 1778     | 0.81     | 0.229773 |          |
| 252712_at   | A13g33800 | glutathione transferase-like protein clu glutathione S-transferase, putative            | 296  | 283  | 294  | 200  | 216  | 161  | 291  | 192  | 1.51     | 0.004174 | 145      | 139  | 151  | 149  | 125  | 114  | 124  | 124  | 145  | 127  | 1.14     | 0.060599 | 129      | 1.12     | 0.211545 |          |
| 252713_at   | A13g33810 | calpainin-7, supported by full-length calmodulin-7 (CAM7)                               | 1345 | 1425 | 1463 | 1651 | 1725 | 1558 | 1411 | 1640 | 0.86     | 0.016760 | 1049     | 1021 | 1308 | 1637 | 1286 | 1098 | 1159 | 1126 | 1279 | 1126 | 0.88     | 0.055087 | 1340     | 0.84     | 0.307506 |          |
| 252714_x_at | A13g33880 | putative protein g97 homologous protein hvchothetical protein /// hvchothetical prot    | 16   | 17   | 20   | 21   | 28   | 24   | 18   | 24   | 0.73     | 0.063048 | 14       | 15   | 16   | 18   | 9    | 12   | 14   | 12   | 15   | 13   | 1.16     | 0.290434 | 13       | 1.16     | 0.450471 |          |
| 252715_x_at | A13g33900 | outative protein predicted protein, Arat hvchothetical protein /// hvchothetical prot   | 33   | 36   | 51   | 53   | 52   | 52   | 40   | 52   | 0.77     | 0.087468 | 34       | 30   | 42   | 33   | 34   | 34   | 37   | 36   | 35   | 35   | 1.01     | 0.924559 | 34       | 1.04     | 0.695567 |          |
| 252716_at   | A13g33920 | outative protein CAF protein, Arabidob rubiconase III family protein                    | 180  | 225  | 235  | 243  | 299  | 207  | 213  | 250  | 0.85     | 0.313239 | 170      | 145  | 181  | 237  | 210  | 158  | 188  | 165  | 196  | 186  | 0.84     | 0.161636 | 202      | 0.82     | 0.226231 |          |
| 252717_at   | A13g33930 | putative protein predicted proteins, Arat expressed protein                             | 12   | 16   | 17   | 14   | 14   | 19   | 15   | 14   | 1.16     | 0.551628 | 18       | 21   | 15   | 16   | 16   | 18   | 15   | 15   | 12   | 14   | 1.05     | 0.308549 | 17       | 1.04     | 0.756028 |          |
| 252718_at   | A13g33940 | putative protein predicted proteins, Arat hvchothetical protein                         | 34   | 36   | 53   | 41   | 45   | 41   | 42   | 43   | 0.97     | 0.838745 | 29       | 23   | 28   | 27   | 27   | 26   | 29   | 27   | 27   | 27   | 1.01     | 0.922932 | 27       | 1.00     | 0.989627 |          |
| 252719_at   | A13g33950 | putative protein predicted protein, Arat hvchothetical protein                          | 17   | 21   | 20   | 25   | 26   | 26   | 19   | 25   | 0.75     | 0.009904 | 17       | 20   | 22   | 20   | 17   | 21   | 20   | 17   | 20   | 19   | 1.05     | 0.585814 | 19       | 1.02     | 0.834278 |          |
| 252720_at   | A13g33970 | putative protein predicted protein, Arat hvchothetical protein                          | 79   | 83   | 135  | 111  | 126  | 106  | 99   | 114  | 0.87     | 0.478120 | 37       | 36   | 51   | 46   | 38   | 36   | 51   | 52   | 41   | 44   | 0.93     | 0.590724 | 40       | 1.03     | 0.825259 |          |
| 252721_at   | A13g33990 | outative protein predicted proteins, Arat bromo-adenant homolog (BAH) domain            | 14   | 23   | 20   | 21   | 22   | 19   | 19   | 21   | 0.93     | 0.631707 | 19       | 22   | 20   | 12   | 13   | 12   | 16   | 15   | 20   | 14   | 1.50     | 0.071752 | 12       | 1.65     | 0.008096 |          |
| 252687_at   | A13g40000 | outative protein predicted protein, Arat Mutator-like transposase family                | 44   | 51   | 60   | 49   | 51   | 53   | 51   | 53   | 1.04     | 0.679233 | 44       | 54   | 56   | 53   | 43   | 14   | 17   | 24   | 51   | 53   | 0.57     | 0.172451 | 45       | 1.25     | 0.251191 |          |
| 252688_at   | A13g40200 | putative protein hvchothetical protein hvchothetical protein hvchothetical protein      | 86   | 165  | 107  | 126  | 126  | 82   | 119  | 111  | 0.77     | 0.796604 | 113      | 97   | 134  | 178  | 127  | 128  | 153  | 133  | 115  | 144  | 0.80     | 0.099103 | 144      | 0.79     | 0.207794 |          |
| 252689_at   | A13g40300 | putative protein predicted proteins, Arat pseudogene, similar to OSJNB0043H0            | 25   | 35   | 39   | 31   | 38   | 41   | 33   | 37   | 0.89     | 0.511101 |          |      |      |      |      |      |      |      |      |      |          |          |          |          |          |          |

|             |           |                                                                                        |      |      |      |      |      |      |      |      |          |          |      |      |      |      |      |      |      |      |      |      |      |           |          |       |          |          |
|-------------|-----------|----------------------------------------------------------------------------------------|------|------|------|------|------|------|------|------|----------|----------|------|------|------|------|------|------|------|------|------|------|------|-----------|----------|-------|----------|----------|
| 252644_at   | A13g44630 | disease resistance protein homoloq ii disease resistance protein RPP1-Vsb-II           | 43   | 36   | 49   | 84   | 66   | 56   | 43   | 69   | 0.62     | 0.043009 | 34   | 35   | 38   | 48   | 40   | 38   | 55   | 54   | 36   | 47   | 0.76 | 0.061127  | 42       | 0.86  | 0.141374 |          |
| 252649_at   | A13g44680 | putative protein histone deacetylase 1 histone deacetylase, putative                   | 96   | 135  | 125  | 143  | 168  | 123  | 118  | 145  | 0.82     | 0.202059 | 82   | 71   | 83   | 136  | 107  | 88   | 108  | 102  | 79   | 108  | 0.73 | 0.034642  | 110      | 0.71  | 0.009616 |          |
| 252650_at   | A13g44690 | putative protein                                                                       | 46   | 54   | 57   | 71   | 73   | 65   | 52   | 70   | 0.75     | 0.011377 | 35   | 43   | 49   | 63   | 49   | 42   | 47   | 45   | 43   | 49   | 0.87 | 0.301391  | 51       | 0.83  | 0.313029 |          |
| 252651_at   | A13g44700 | putative protein several hypothetical on expressed protein                             | 18   | 21   | 19   | 19   | 19   | 21   | 17   | 20   | 0.86     | 0.130817 | 17   | 21   | 19   | 138  | 17   | 17   | 16   | 13   | 17   | 16   | 1.12 | 0.5318036 | 15       | 1.26  | 0.092295 |          |
| 252652_at   | A13g44720 | putative chloroplast gretheneate dehdv: prephenate dehydratase family protein          | 118  | 106  | 154  | 133  | 138  | 110  | 126  | 127  | 0.99     | 0.969593 | 93   | 111  | 110  | 97   | 78   | 69   | 95   | 106  | 105  | 89   | 1.18 | 0.169241  | 81       | 1.29  | 0.078829 |          |
| 252653_at   | A13g44730 | putative kinesin-like protein similar to 4 kinesin motor protein-related               | 51   | 60   | 59   | 67   | 70   | 62   | 57   | 66   | 0.86     | 0.068945 | 46   | 43   | 45   | 51   | 39   | 43   | 45   | 44   | 45   | 44   | 1.01 | 0.918876  | 44       | 1.01  | 0.907735 |          |
| 252654_at   | A13g44740 | similar to glycyI RNA synthetase RNA synthetase class II (G, H, P and S                | 55   | 76   | 96   | 95   | 69   | 97   | 76   | 87   | 0.87     | 0.488937 | 42   | 46   | 60   | 52   | 38   | 42   | 51   | 62   | 50   | 42   | 1.01 | 0.943768  | 44       | 1.13  | 0.458924 |          |
| 252655_at   | A13g44760 | hypothetical protein                                                                   | 18   | 21   | 25   | 22   | 25   | 24   | 27   | 0.87 | 0.048608 | 14       | 14   | 15   | 17   | 17   | 17   | 16   | 16   | 16   | 16   | 15   | 0.84 | 0.152118  | 19       | 0.81  | 0.046111 |          |
| 252656_at   | A13g44770 | hypothetical protein                                                                   | 48   | 62   | 70   | 69   | 70   | 59   | 60   | 69   | 0.87     | 0.346332 | 37   | 34   | 49   | 44   | 36   | 37   | 52   | 42   | 40   | 42   | 0.94 | 0.640564  | 39       | 1.02  | 0.868677 |          |
| 252657_at   | A13g44780 | hypothetical protein                                                                   | 17   | 17   | 22   | 24   | 24   | 23   | 19   | 24   | 0.79     | 0.035202 | 11   | 21   | 21   | 16   | 21   | 16   | 25   | 18   | 18   | 19   | 0.91 | 0.614510  | 18       | 0.98  | 0.914665 |          |
| 252658_at   | A13g44800 | hypothetical protein                                                                   | 27   | 32   | 30   | 31   | 28   | 29   | 30   | 29   | 1.01     | 0.906206 | 24   | 24   | 39   | 25   | 25   | 22   | 25   | 26   | 29   | 24   | 1.18 | 0.291959  | 24       | 1.21  | 0.397544 |          |
| 252659_at   | A13g44735 | Expressed protein : supported by full-length phosphotyrosine-related                   | 218  | 206  | 215  | 261  | 185  | 151  | 213  | 199  | 0.87     | 0.700950 | 108  | 130  | 142  | 303  | 167  | 150  | 199  | 122  | 127  | 206  | 0.51 | 0.069755  | 207      | 0.61  | 0.179520 |          |
| 252661_at   | A13g44750 | putative histone deacetylase similar to histone deacetylase, putative (HD2A)           | 1092 | 1142 | 1223 | 1368 | 1280 | 1187 | 1152 | 1278 | 0.90     | 0.250953 | 1272 | 1172 | 1404 | 1605 | 1364 | 1239 | 1241 | 1280 | 1283 | 1346 | 0.95 | 0.569533  | 1403     | 0.91  | 0.398144 |          |
| 252662_at   | A13g44940 | putative protein predicted protein, Arab expressed protein                             | 68   | 86   | 92   | 114  | 133  | 105  | 82   | 117  | 0.70     | 0.030223 | 66   | 81   | 80   | 103  | 85   | 85   | 77   | 75   | 76   | 85   | 0.89 | 0.256997  | 91       | 0.83  | 0.114797 |          |
| 252627_at   | A13g44950 | putative protein                                                                       | 185  | 210  | 275  | 267  | 292  | 254  | 224  | 271  | 0.83     | 0.176551 | 125  | 122  | 140  | 153  | 135  | 129  | 161  | 162  | 129  | 148  | 0.87 | 0.108383  | 139      | 0.93  | 0.346204 |          |
| 252628_at   | A13g44960 | putative protein                                                                       | 33   | 47   | 39   | 51   | 67   | 50   | 39   | 56   | 0.71     | 0.075561 | 28   | 32   | 37   | 55   | 52   | 46   | 30   | 35   | 32   | 44   | 0.74 | 0.145234  | 51       | 0.64  | 0.006768 |          |
| 252629_at   | A13g44970 | putative protein cytochrome P450 - like protein cytochr cytochrome P450 family protein | 14   | 15   | 16   | 16   | 16   | 17   | 15   | 16   | 0.91     | 0.089891 | 10   | 9    | 15   | 17   | 17   | 12   | 14   | 12   | 13   | 11   | 12   | 0.91      | 0.428502 | 13    | 0.90     | 0.535373 |
| 252630_at   | A13g44980 | putative protein                                                                       | 26   | 39   | 55   | 48   | 53   | 40   | 40   | 47   | 0.85     | 0.477387 | 35   | 35   | 36   | 35   | 35   | 33   | 69   | 55   | 35   | 45   | 0.78 | 0.329710  | 34       | 1.03  | 0.251262 |          |
| 252600_at   | A13g45000 | putative protein unknown protein CGI- SNF7 family protein                              | 21   | 24   | 23   | 27   | 31   | 26   | 23   | 28   | 0.81     | 0.055241 | 17   | 20   | 20   | 21   | 19   | 20   | 14   | 16   | 19   | 20   | 1.04 | 0.702148  | 20       | 0.93  | 0.242779 |          |
| 252601_s_at | A13g45030 | 40S ribosomal protein 40S ribosom 40S ribosomal protein S20 (RPS20A) ///               | 3413 | 3894 | 3740 | 3857 | 4083 | 3553 | 3682 | 3831 | 0.96     | 0.515136 | 3647 | 3636 | 3903 | 4440 | 3947 | 3549 | 3834 | 3877 | 3729 | 3930 | 0.95 | 0.359915  | 3979     | 0.94  | 0.409308 |          |
| 252602_at   | A13g45040 | putative protein KIAA1094 protein, hor phosphatidate cytidylyltransferase famh,        | 223  | 315  | 275  | 302  | 400  | 248  | 271  | 317  | 0.86     | 0.426144 | 233  | 190  | 222  | 286  | 248  | 215  | 257  | 215  | 252  | 252  | 0.85 | 0.704161  | 248      | 0.87  | 0.223252 |          |
| 252603_at   | A13g45050 | putative protein                                                                       | 74   | 111  | 113  | 119  | 129  | 97   | 100  | 115  | 0.87     | 0.391917 | 115  | 132  | 118  | 164  | 141  | 127  | 120  | 120  | 120  | 122  | 0.90 | 0.320654  | 144      | 0.84  | 0.132965 |          |
| 252604_at   | A13g45060 | high-affinity nitrate transporter - like on                                            | 83   | 110  | 146  | 134  | 125  | 114  | 113  | 125  | 0.91     | 0.578052 | 70   | 92   | 95   | 88   | 72   | 78   | 100  | 97   | 86   | 87   | 0.98 | 0.865912  | 80       | 1.07  | 0.553403 |          |
| 252605_s_at | A13g45070 | sulfotransferase protein family FLAVIN/C sulfotransferase family protein /// sulfotr   | 14   | 4    | 8    | 4    | 15   | 5    | 9    | 8    | 1.11     | 0.847420 | 11   | 7    | 6    | 5    | 5    | 6    | 7    | 9    | 8    | 6    | 1.22 | 0.418640  | 5        | 1.52  | 0.164619 |          |
| 252606_at   | A13g45010 | carboxypeptidase precursor-like protei serine carboxypeptidase III, putative           | 215  | 243  | 249  | 185  | 216  | 163  | 215  | 188  | 1.15     | 0.321675 | 176  | 176  | 159  | 158  | 181  | 200  | 158  | 181  | 170  | 178  | 0.86 | 0.468714  | 180      | 0.95  | 0.502238 |          |
| 252607_at   | A13g44990 | xylocougan endo-transglycosylase - suu xylocougan:xylocoulosyl transferase, put        | 12   | 13   | 14   | 13   | 13   | 13   | 13   | 13   | 0.98     | 0.673211 | 10   | 11   | 15   | 13   | 11   | 9    | 8    | 10   | 12   | 10   | 1.17 | 0.321835  | 11       | 1.10  | 0.622934 |          |
| 252608_at   | A13g45090 | putative protein 2-phosphohydroxylate ki 2-phosphohydroxylate kinase-related           | 223  | 215  | 199  | 285  | 322  | 252  | 212  | 287  | 0.74     | 0.025646 | 145  | 121  | 170  | 201  | 193  | 147  | 190  | 185  | 145  | 183  | 0.79 | 0.057395  | 180      | 0.81  | 0.184072 |          |
| 252609_at   | A13g45110 | putative protein                                                                       | 17   | 16   | 19   | 22   | 20   | 24   | 17   | 22   | 0.80     | 0.038386 | 13   | 15   | 18   | 18   | 15   | 14   | 14   | 16   | 15   | 15   | 1.01 | 0.922594  | 16       | 0.99  | 0.925121 |          |
| 252610_x_at | A13g45120 | putative protein putative MuDr protein kinase-like transacsoase family /// hvoot       | 38   | 54   | 53   | 55   | 54   | 56   | 48   | 55   | 0.88     | 0.283316 | 49   | 59   | 47   | 42   | 43   | 33   | 46   | 52   | 43   | 43   | 1.21 | 0.087892  | 39       | 1.31  | 0.056154 |          |
| 252611_at   | A13g45130 | putative protein                                                                       | 31   | 31   | 31   | 31   | 31   | 31   | 31   | 31   | 0.84     | 0.02669  | 35   | 34   | 35   | 35   | 35   | 35   | 35   | 35   | 35   | 35   | 1.12 | 0.372795  | 35       | 1.07  | 0.624794 |          |
| 252612_at   | A13g45160 | hypothetical protein                                                                   | 12   | 12   | 14   | 13   | 14   | 15   | 13   | 14   | 0.89     | 0.188560 | 7    | 11   | 9    | 8    | 8    | 6    | 10   | 6    | 9    | 8    | 1.16 | 0.394404  | 7        | 1.20  | 0.361038 |          |
| 252613_at   | A13g45190 | putative protein                                                                       | 215  | 293  | 295  | 275  | 319  | 239  | 268  | 278  | 0.96     | 0.786405 | 219  | 214  | 204  | 283  | 235  | 197  | 286  | 253  | 213  | 251  | 0.85 | 0.135516  | 238      | 0.89  | 0.366195 |          |
| 252614_at   | A13g45220 | serpin-like protein serpin - Hordeum vs. serpin, putative / serine protease inhibit    | 25   | 27   | 26   | 28   | 32   | 30   | 26   | 30   | 0.87     | 0.051501 | 25   | 27   | 33   | 28   | 23   | 26   | 26   | 26   | 28   | 24   | 1.16 | 0.178136  | 23       | 1.22  | 0.179986 |          |
| 252615_at   | A13g45230 | serineproline-rich protein                                                             | 392  | 319  | 370  | 440  | 337  | 399  | 360  | 425  | 0.85     | 0.063250 | 422  | 465  | 506  | 673  | 429  | 386  | 432  | 443  | 464  | 472  | 0.98 | 0.912720  | 465      | 0.94  | 0.754468 |          |
| 252616_at   | A13g45240 | serine threonine protein kinase-like protein kinase family protein                     | 138  | 201  | 229  | 228  | 265  | 206  | 189  | 233  | 0.81     | 0.299493 | 169  | 169  | 168  | 248  | 199  | 183  | 216  | 196  | 169  | 208  | 0.81 | 0.039188  | 210      | 0.80  | 0.105064 |          |
| 252617_at   | A13g45100 | n-acetylglucosaminyl-chosohatidivlinos N-acetylglucosaminyl-chosohatidivlinos          | 228  | 322  | 345  | 289  | 331  | 274  | 298  | 298  | 1.00     | 0.999419 | 273  | 289  | 301  | 385  | 340  | 309  | 351  | 320  | 288  | 341  | 0.84 | 0.027970  | 345      | 0.83  | 0.071407 |          |
| 252618_at   | A13g45140 | lipoygenase AILOX2 : supported by c lipoygenase (LOX2)                                 | 165  | 241  | 103  | 396  | 250  | 335  | 170  | 327  | 0.52     | 0.053994 | 79   | 79   | 135  | 272  | 274  | 214  | 302  | 309  | 97   | 274  | 0.36 | 0.000511  | 253      | 0.38  | 0.004543 |          |
| 252619_at   | A13g45210 | putative protein several hypothetical on expressed protein                             | 159  | 140  | 141  | 175  | 189  | 169  | 136  | 157  | 0.73     | 0.07979  | 136  | 134  | 157  | 235  | 186  | 160  | 128  | 141  | 142  | 170  | 0.84 | 0.320575  | 194      | 0.73  | 0.093739 |          |
| 252620_at   | A13g45250 | hypothetical protein                                                                   | 6    | 10   | 6    | 6    | 6    | 9    | 8    | 7    | 0.97     | 0.876379 | 6    | 6    | 6    | 10   | 4    | 7    | 7    | 7    | 6    | 7    | 0.92 | 0.643450  | 7        | 0.93  | 0.772807 |          |
| 252621_at   | A13g45270 | putative protein Ac-like transposase                                                   | 41   | 36   | 62   | 57   | 50   | 54   | 47   | 53   | 0.87     | 0.450330 | 27   | 34   | 37   | 30   | 38   | 35   | 41   | 28   | 33   | 33   | 1.01 | 0.943721  | 31       | 1.05  | 0.666536 |          |
| 252622_at   | A13g45310 | cysteine proteinase AALP, putative sn                                                  | 167  | 279  | 245  | 288  | 317  | 255  | 230  | 287  | 0.80     | 0.208322 | 290  | 296  | 291  | 444  | 394  | 326  | 317  | 319  | 293  | 360  | 0.81 | 0.094797  | 388      | 0.75  | 0.049431 |          |
| 252623_at   | A13g45320 | hypothetical protein                                                                   | 24   | 30   | 30   | 34   | 30   | 26   | 30   | 35   | 0.83     | 0.083916 | 31   | 28   | 39   | 28   | 28   | 34   | 28   | 34   | 28   | 33   | 1.08 | 0.470890  | 30       | 1.09  | 0.523974 |          |
| 252624_at   | A13g45330 | receptor-like protein kinase receptor li                                               | 16   | 16   | 23   | 23   | 24   | 23   | 18   | 23   | 0.79     | 0.128734 | 18   | 19   | 21   | 19   | 20   | 16   | 19   | 16   | 19   | 19   | 0.97 | 0.834781  | 19       | 0.93  | 0.772703 |          |
| 252597_at   | A13g45360 | putative protein several hypothetical on                                               | 7    | 0    | 1    | 0    | 0    | 0    | 3    | 0    | 1.4840   | 0.291906 | 1    | 3    | 1    | 0    | 0    | 0    | 0    | 1    | 2    | 0    | 4.15 | 0.070482  | 0        | 10.80 | 0.105054 |          |
| 252598_at   | A13g45380 | putative protein putative proteins AT4c expressed protein /// pseudogene, hvot         | 1    | 1    | 2    | 2    | 1    | 1    | 1    | 2    | 0.85     | 0.542465 | 3    | 6    | 3    | 1    | 1    | 1    | 4    | 2    | 4    | 2    | 1.92 | 0.152878  | 1        | 3.23  | 0.082849 |          |
| 252599_at   | A13g45390 | receptor-like protein kinase receptor li                                               | 30   | 32   | 38   | 42   | 39   | 37   | 33   | 39   | 0.84     | 0.092731 | 28   | 23   | 35   | 31   | 25   | 27   | 30   | 35   | 29   | 29   | 0.98 | 0.852066  | 28       | 1.03  | 0.862507 |          |
| 252598_at   | A13g45410 | receptor-like protein kinase receptor li                                               | 42   | 52   | 57   | 68   | 66   | 52   | 60   | 58   | 0.86     | 0.092148 | 35   | 42   | 50   | 48   | 37   | 35   | 40   | 45   | 40   | 45   | 0.98 | 0.902148  | 45       | 0.99  | 0.694946 |          |
| 252599_at   | A13g45420 | receptor-like protein kinase receptor li                                               | 39   | 49   | 56   | 61   | 62   | 53   | 48   | 59   | 0.82     | 0.138905 | 35   | 29   | 36   | 40   | 36   | 33   | 44   | 42   | 34   | 39   | 0.86 | 0.146096  | 36       | 0.93  | 0.441542 |          |
| 252570_at   | A13g45300 | isovaleryl-CoA-dehydrogenase precurs                                                   | 198  | 250  | 372  | 209  | 251  | 196  | 210  | 219  | 1.23     | 0.413404 | 265  | 386  | 268  | 367  | 288  | 271  | 390  | 355  | 307  | 334  | 0.92 | 0.539601  | 309      | 0.99  | 0.9      |          |

|             |           |                                                                                      |      |      |      |      |      |      |      |      |          |          |         |      |      |      |      |      |          |      |      |          |          |          |          |          |          |
|-------------|-----------|--------------------------------------------------------------------------------------|------|------|------|------|------|------|------|------|----------|----------|---------|------|------|------|------|------|----------|------|------|----------|----------|----------|----------|----------|----------|
| 252560_at   | A13g46030 | histone H2B - like protein histone H2B1 histone H2B, putative                        | 549  | 728  | 685  | 787  | 836  | 713  | 654  | 779  | 0.84     | 0.125890 | 540     | 546  | 611  | 835  | 622  | 571  | 672      | 733  | 566  | 686      | 0.82     | 0.104956 | 667      | 0.84     | 0.259991 |
| 252561_at   | A13g45980 | histone H2B - supported by full-length c histone H2B                                 | 2522 | 2563 | 2701 | 2881 | 3200 | 2548 | 2505 | 2776 | 0.87     | 0.128882 | 2025    | 1970 | 2315 | 2944 | 2651 | 2285 | 2848     | 2719 | 2103 | 2689     | 0.78     | 0.013624 | 2676     | 0.80     | 0.074829 |
| 252562_s_at | A13g45930 | Histone H4 - like protein histone H4. Z1 histone H4 // histone H4                    | 1317 | 1680 | 1537 | 1816 | 1845 | 1676 | 1511 | 1779 | 0.85     | 0.085704 | 1143    | 1042 | 1262 | 1609 | 1266 | 1186 | 1112     | 1227 | 1149 | 1280     | 0.90     | 0.329641 | 1354     | 0.85     | 0.228975 |
| 252563_at   | A13g45910 | actin depolymerizing factor 1 (ADF1) - inducible protein, expressed                  | 1149 | 619  | 1204 | 479  | 589  | 412  | 997  | 493  | 2.02     | 0.085704 | 1737    | 1588 | 1157 | 1107 | 1157 | 1107 | 1107     | 1107 | 1107 | 1220     | 1.00     | 0.161921 | 1009     | 1.00     | 0.045456 |
| 252564_at   | A13g46010 | actin depolymerizing factor 1 (ADF1) - actin-depolymerizing factor 1 (ADF1)          | 719  | 870  | 875  | 1105 | 1199 | 1012 | 821  | 1105 | 0.74     | 0.018700 | 947     | 988  | 949  | 1375 | 1288 | 1050 | 1045     | 1028 | 961  | 1125     | 0.85     | 0.080560 | 1184     | 0.81     | 0.087277 |
| 252565_at   | A13g46000 | actin depolymerizing factor 2 (ADF2) - actin-depolymerizing factor, putative (AC)    | 434  | 581  | 662  | 724  | 816  | 648  | 559  | 729  | 0.77     | 0.108528 | 596     | 700  | 677  | 978  | 738  | 712  | 721      | 732  | 658  | 776      | 0.85     | 0.148877 | 909      | 0.81     | 0.169747 |
| 252566_at   | A13g46040 | cytoplasmic ribosomal protein S15a - 40S ribosomal protein S15A (RPS15A)             | 2054 | 2545 | 2584 | 2439 | 2713 | 2268 | 2394 | 2473 | 0.97     | 0.730092 | 2186    | 2308 | 2199 | 2721 | 2489 | 2216 | 2833     | 2721 | 2231 | 2596     | 0.86     | 0.050625 | 2475     | 0.90     | 0.180881 |
| 252567_at   | A13g46050 | zinc finger protein 35 - zinc finger protein 35 (ZNF35) family protein               | 22   | 12   | 11   | 11   | 14   | 12   | 12   | 0.59 | 0.088735 | 11       | 11      | 14   | 11   | 14   | 11   | 9    | 14       | 8    | 12   | 11       | 1.14     | 0.628618 | 20       | 1.00     | 0.023490 |
| 252568_at   | A13g46110 | putative protein predicted protein. Arat expressed protein                           | 43   | 52   | 57   | 74   | 70   | 66   | 51   | 70   | 0.72     | 0.013273 | 59      | 69   | 67   | 78   | 61   | 58   | 54       | 61   | 65   | 63       | 1.04     | 0.701540 | 66       | 0.99     | 0.913005 |
| 252569_at   | A13g46130 | Mb DNA binding protein -like MYB59, myb family transcription factor (MYB48)          | 21   | 24   | 28   | 25   | 25   | 30   | 24   | 27   | 0.91     | 0.389350 | 23      | 23   | 27   | 21   | 16   | 18   | 27       | 20   | 24   | 21       | 1.19     | 0.187899 | 18       | 1.34     | 0.029317 |
| 252570_at   | A13g46150 | hypothetical protein                                                                 | 43   | 65   | 62   | 56   | 59   | 50   | 59   | 0.85 | 0.296389 | 32       | 35      | 46   | 48   | 42   | 47   | 38   | 38       | 38   | 43   | 0.88     | 0.235325 | 43       | 0.87     | 0.029533 |          |
| 252571_at   | A13g46170 | dehydrogenase -like protein alcohol dehydrogenase/reductase (C)                      | 14   | 20   | 18   | 20   | 35   | 35   | 23   | 17   | 29       | 0.60     | 0.03213 | 9    | 9    | 15   | 12   | 18   | 19       | 20   | 12   | 19       | 0.53     | 0.001468 | 19       | 0.65     | 0.016594 |
| 252572_at   | A13g46180 | putative protein UDP-glucose transp UDP-glucose transp                               | 114  | 125  | 144  | 159  | 126  | 111  | 143  | 0.77 | 0.071044 | 107      | 139     | 130  | 189  | 146  | 147  | 142  | 134      | 125  | 156  | 0.80     | 0.162389 | 168      | 0.75     | 0.138404 |          |
| 252573_at   | A13g46200 | putative protein predicted protein. Sac MutT/nudix family protein                    | 168  | 239  | 202  | 250  | 291  | 235  | 203  | 259  | 0.77     | 0.104414 | 251     | 252  | 285  | 395  | 332  | 290  | 294      | 276  | 263  | 317      | 0.83     | 0.118667 | 339      | 0.78     | 0.080620 |
| 252574_at   | A13g46210 | putative protein tRNA nucleotidyltransferase 3' exoribonuclease family domain 1-cont | 239  | 311  | 355  | 361  | 378  | 313  | 302  | 351  | 0.86     | 0.278573 | 364     | 401  | 423  | 502  | 418  | 423  | 407      | 391  | 396  | 428      | 0.92     | 0.303991 | 448      | 0.88     | 0.183188 |
| 252575_at   | A13g46240 | putative protein serine/threonine-specific protein kinase-related                    | 50   | 52   | 69   | 65   | 58   | 65   | 57   | 63   | 0.91     | 0.431963 | 49      | 57   | 58   | 47   | 48   | 43   | 66       | 56   | 55   | 52       | 1.05     | 0.675369 | 46       | 1.19     | 0.055180 |
| 252576_at   | A13g46440 | putative protein serine/threonine-specific receptor protein kinase-related           | 23   | 22   | 36   | 36   | 36   | 31   | 27   | 30   | 0.89     | 0.606565 | 25      | 21   | 27   | 17   | 22   | 34   | 37       | 24   | 26   | 24       | 0.94     | 0.820528 | 19       | 1.29     | 0.090907 |
| 252577_at   | A13g46290 | receptor protein kinase -like receptor-like protein kinase, putative                 | 70   | 75   | 85   | 82   | 91   | 74   | 77   | 82   | 0.94     | 0.489502 | 54      | 48   | 65   | 84   | 65   | 62   | 72       | 64   | 56   | 68       | 0.81     | 0.109927 | 69       | 0.81     | 0.214308 |
| 252578_at   | A13g46220 | putative protein KIAA0776 protein. Hor expressed protein                             | 235  | 256  | 279  | 296  | 334  | 221  | 256  | 284  | 0.90     | 0.486281 | 225     | 209  | 257  | 265  | 263  | 274  | 254      | 242  | 230  | 248      | 0.93     | 0.395742 | 247      | 0.93     | 0.546007 |
| 252579_at   | A13g46060 | GTP-binding protein ara-3 - supported. Ras-related protein (ARA-3) / small GTP       | 496  | 578  | 595  | 653  | 756  | 634  | 556  | 691  | 0.81     | 0.045340 | 486     | 502  | 555  | 741  | 653  | 529  | 532      | 504  | 514  | 592      | 0.87     | 0.262390 | 641      | 0.80     | 0.123278 |
| 252580_at   | A13g46230 | heat shock protein 17 - supported by c 17.4 kDa class I heat shock protein (HSI)     | 32   | 59   | 57   | 109  | 344  | 109  | 50   | 214  | 0.23     | 0.077149 | 32      | 29   | 34   | 37   | 32   | 30   | 28       | 32   | 32   | 39       | 1.11     | 0.422155 | 30       | 1.07     | 0.684221 |
| 252581_at   | A13g46100 | histidinyl-RNA synthetase - supported by histidinyl-RNA synthetase / histidine-IRN   | 328  | 471  | 450  | 465  | 504  | 415  | 416  | 461  | 0.90     | 0.433558 | 419     | 405  | 459  | 603  | 483  | 438  | 529      | 503  | 428  | 511      | 0.88     | 0.073013 | 508      | 0.84     | 0.197489 |
| 252582_at   | A13g46340 | receptor-like protein kinase homolog I leucine-rich repeat protein kinase, puta      | 22   | 28   | 25   | 27   | 25   | 23   | 26   | 0.89 | 0.402490 | 16       | 15      | 23   | 19   | 18   | 18   | 18   | 28       | 18   | 20   | 0.88     | 0.468584 | 18       | 0.97     | 0.816313 |          |
| 252583_at   | A13g46350 | receptor-like protein kinase homolog I leucine-rich repeat protein kinase, puta      | 37   | 41   | 38   | 40   | 35   | 38   | 39   | 41   | 0.95     | 0.412712 | 25      | 22   | 30   | 27   | 31   | 30   | 26       | 28   | 32   | 0.82     | 0.430080 | 26       | 0.99     | 0.929555 |          |
| 252584_at   | A13g46360 | hypothetical protein                                                                 | 60   | 67   | 87   | 89   | 77   | 71   | 85   | 0.84 | 0.205294 | 45       | 45      | 55   | 53   | 48   | 49   | 46   | 48       | 49   | 0.99 | 0.824628 | 50       | 0.97     | 0.687388 |          |          |
| 252585_at   | A13g46370 | receptor-like protein kinase homolog I leucine-rich repeat protein kinase, puta      | 14   | 18   | 18   | 22   | 17   | 16   | 19   | 0.85 | 0.234712 | 12       | 13      | 12   | 12   | 12   | 12   | 12   | 12       | 11   | 1.10 | 0.339028 | 11       | 1.16     | 0.273304 |          |          |
| 252586_at   | A13g46380 | hypothetical protein                                                                 | 56   | 62   | 79   | 87   | 88   | 71   | 85   | 0.83 | 0.300684 | 34       | 33      | 47   | 42   | 35   | 37   | 51   | 53       | 38   | 44   | 0.87     | 0.348655 | 38       | 0.99     | 0.950113 |          |
| 252587_at   | A13g46390 | hypothetical protein // no acical meriste                                            | 3    | 3    | 2    | 1    | 2    | 2    | 3    | 1.38 | 0.244871 | 2        | 5       | 3    | 3    | 2    | 4    | 12   | 2        | 3    | 5    | 0.54     | 0.445021 | 3        | 0.83     | 0.724459 |          |
| 252588_at   | A13g46400 | putative protein leucine-rich repeat protein kinase, puta                            | 7    | 11   | 1    | 1    | 10   | 10   | 10   | 0.80 | 0.519792 | 13       | 7       | 11   | 9    | 8    | 7    | 10   | 0.07088  | 12   | 11   | 0.88     | 0.011428 | 12       | 1.02     | 0.262337 |          |
| 252589_at   | A13g46430 | putative protein mitochondrial ATP SY1 expressed protein                             | 1063 | 1243 | 1195 | 1285 | 1340 | 1255 | 1167 | 1293 | 0.90     | 0.100610 | 1155    | 1296 | 1275 | 1621 | 1259 | 1165 | 1249     | 1273 | 1242 | 1313     | 0.95     | 0.540386 | 1349     | 0.92     | 0.504758 |
| 252590_at   | A13g46450 | putative protein hypothetical proteins SEC14 cytosolic factor family protein / p     | 125  | 162  | 201  | 217  | 258  | 184  | 162  | 220  | 0.74     | 0.136101 | 158     | 145  | 168  | 248  | 214  | 187  | 204      | 193  | 157  | 209      | 0.75     | 0.013554 | 217      | 0.73     | 0.034367 |
| 252591_at   | A13g46480 | putative protein ethylene-forming enzy oxidoreductase, ZOG-Fe(II) oxoanase I         | 22   | 25   | 36   | 23   | 26   | 23   | 28   | 24   | 1.16     | 0.434774 | 30      | 23   | 26   | 18   | 21   | 19   | 24       | 26   | 26   | 22       | 1.20     | 0.138648 | 19       | 1.35     | 0.028934 |
| 252592_at   | A13g46440 | dUDP-glucose 4-6-dehydrogenase-like o NAD-dependent oximase/dehydrogenase            | 341  | 391  | 412  | 437  | 489  | 405  | 381  | 447  | 0.85     | 0.132615 | 392     | 445  | 410  | 581  | 462  | 437  | 439      | 437  | 416  | 462      | 0.90     | 0.325417 | 478      | 0.87     | 0.329728 |
| 252593_at   | A13g46460 | E2 ubiquitin-conjugating enzyme 13 (UBC1)                                            | 130  | 165  | 179  | 209  | 211  | 179  | 158  | 200  | 0.79     | 0.081901 | 181     | 184  | 212  | 299  | 243  | 219  | 216      | 187  | 192  | 233      | 0.83     | 0.169872 | 254      | 0.76     | 0.074664 |
| 252594_at   | A13g46490 | putative protein several oxidases, mair oxidoreductase, ZOG-Fe(II) oxoanase I        | 20   | 20   | 27   | 25   | 26   | 22   | 26   | 28   | 0.85     | 0.192958 | 20      | 17   | 18   | 21   | 23   | 21   | 21       | 21   | 21   | 0.88     | 0.180820 | 20       | 0.92     | 0.444662 |          |
| 252595_at   | A13g46500 | putative protein several oxidases, mair oxidoreductase, ZOG-Fe(II) oxoanase I        | 12   | 19   | 20   | 22   | 23   | 19   | 17   | 21   | 0.81     | 0.239701 | 28      | 37   | 32   | 67   | 44   | 46   | 49       | 57   | 32   | 53       | 0.62     | 0.013646 | 52       | 0.62     | 0.090373 |
| 252596_at   | A13g46520 | actin 12 - actin 12 (ACT12)                                                          | 11   | 14   | 17   | 14   | 14   | 14   | 14   | 0.98 | 0.010135 | 15       | 16      | 15   | 16   | 16   | 13   | 11   | 14       | 16   | 13   | 1.17     | 0.114931 | 12       | 1.02     | 0.262337 |          |
| 252597_at   | A13g46570 | glucosidase-like protein GLUCAN ENL glycosyl hydrolase family 17 protein             | 20   | 19   | 28   | 23   | 21   | 19   | 22   | 21   | 1.06     | 0.735438 | 16      | 23   | 22   | 21   | 17   | 18   | 22       | 19   | 20   | 19       | 1.04     | 0.710016 | 19       | 1.08     | 0.586634 |
| 252598_at   | A13g46590 | telomere repeat-binding protein homol telomere repeat-binding protein, putative      | 190  | 268  | 261  | 333  | 346  | 268  | 239  | 316  | 0.76     | 0.093595 | 189     | 186  | 210  | 284  | 251  | 201  | 266      | 232  | 195  | 247      | 0.79     | 0.040354 | 245      | 0.80     | 0.117928 |
| 252599_s_at | A13g46610 | putative protein several hypotheticals pentatricopeptide (PPR) repeat-containin      | 59   | 80   | 79   | 96   | 100  | 78   | 76   | 92   | 0.83     | 0.250203 | 49      | 58   | 54   | 75   | 52   | 78   | 64       | 54   | 65   | 65       | 0.83     | 0.177781 | 61       | 0.88     | 0.418556 |
| 252600_at   | A13g46620 | putative protein several hypothetical on zinc finger C3HC4-void RING finger) fa      | 1314 | 1445 | 1676 | 2094 | 2184 | 1607 | 1481 | 1862 | 0.75     | 0.081553 | 652     | 707  | 681  | 705  | 1018 | 773  | 771      | 824  | 688  | 858      | 0.77     | 0.028434 | 854      | 0.81     | 0.116372 |
| 252601_s_at | A13g46640 | putative protein several hypothetical on myb family transcription factor // myb fa   | 124  | 134  | 194  | 113  | 146  | 171  | 146  | 171  | 0.85     | 0.023071 | 198     | 258  | 214  | 185  | 192  | 110  | 0.438513 | 179  | 182  | 192      | 1.10     | 0.333778 | 179      | 1.05     | 0.333778 |
| 252602_at   | A13g46650 | glucosyltransferase-like protein UDP-g UDP-glucuronosyl(WUDP-glucose) transfe        | 24   | 27   | 35   | 30   | 41   | 35   | 29   | 35   | 0.81     | 0.219742 | 28      | 25   | 26   | 30   | 26   | 25   | 25       | 26   | 27   | 0.97     | 0.662135 | 28       | 0.93     | 0.321992 |          |
| 252603_at   | A13g46680 | glucosyltransferase-like protein UDP-g UDP-glucuronosyl(WUDP-glucose) transfe        | 19   | 19   | 30   | 27   | 28   | 31   | 23   | 29   | 0.79     | 0.213985 | 19      | 23   | 17   | 16   | 17   | 31   | 16       | 21   | 19   | 1.06     | 0.765801 | 17       | 1.22     | 0.047056 |          |
| 252604_at   | A13g46540 | putative protein mitotic phosphoreceptor eosin N-terminal homolog (ENTH) dom         | 175  | 189  | 192  | 274  | 282  | 249  | 188  | 268  | 0.69     | 0.001868 | 222     | 250  | 231  | 359  | 272  | 250  | 256      | 236  | 234  | 275      | 0.85     | 0.224772 | 294      | 0.80     | 0.157434 |
| 252605_at   | A13g46560 | small zinc finger-like protein TMP - sus mitochondrial inner membrane tr             | 1708 | 2208 | 1225 | 2380 | 2565 | 1708 | 2208 | 2418 | 0.85     | 0.142439 | 1622    | 1824 | 2175 | 1941 | 109  | 84   | 133      | 191  | 1941 | 1098     | 0.80     | 0.236559 | 2264     | 0.86     | 0.196322 |
| 252606_at   | A13g46580 | putative protein methyl-CoG-binding o methyl-CoG-binding domain-containin            | 85   | 115  | 117  | 146  | 159  | 128  | 106  | 143  | 0.74     | 0.067532 | 128     | 148  | 152  | 181  | 135  | 116  | 135      | 133  | 143  | 140      | 1.02     | 0.879599 | 144      | 0.99     | 0.943477 |
| 252607_at   | A13g46630 | putative protein DCL1 PROTEIN, CHLC expressed protein                                | 172  | 216  | 228  | 200  | 270  |      |      |      |          |          |         |      |      |      |      |      |          |      |      |          |          |          |          |          |          |

|             |           |                                                                                       |      |      |      |      |      |      |      |      |          |          |      |      |      |      |      |      |      |      |      |      |          |          |      |          |          |
|-------------|-----------|---------------------------------------------------------------------------------------|------|------|------|------|------|------|------|------|----------|----------|------|------|------|------|------|------|------|------|------|------|----------|----------|------|----------|----------|
| 252464_at   | A13g47160 | RNA-binding protein several hypothetical protein various expressed protein            | 312  | 520  | 659  | 479  | 677  | 436  | 497  | 530  | 0.94     | 0.802955 | 698  | 786  | 619  | 675  | 642  | 761  | 712  | 695  | 701  | 697  | 1.01     | 0.937812 | 693  | 1.01     | 0.902969 |
| 252465_x_at | A13g47260 | putative protein several hypothetical on hypothetical protein /// Up1 protease far    | 44   | 52   | 58   | 50   | 55   | 53   | 51   | 53   | 0.97     | 0.743661 | 37   | 40   | 39   | 35   | 31   | 32   | 40   | 37   | 39   | 35   | 1.10     | 0.162574 | 33   | 1.18     | 0.028488 |
| 252466_x_at | A13g47270 | putative protein several hypothetical on pseudogene, hypothetical protein /// hvo     | 21   | 22   | 28   | 23   | 30   | 26   | 24   | 27   | 0.89     | 0.370980 | 19   | 16   | 21   | 17   | 17   | 14   | 19   | 16   | 19   | 17   | 1.12     | 0.183251 | 16   | 1.17     | 0.157519 |
| 252467_at   | A13g47300 | putative protein predicted proteins, Ar expressed protein                             | 174  | 170  | 215  | 210  | 225  | 175  | 202  | 0.81 | 0.358033 | 138      | 170  | 109  | 107  | 132  | 137  | 134  | 130  | 127  | 130  | 121  | 1.03     | 0.001739 | 132  | 0.81     | 0.011442 |
| 252468_at   | A13g46970 | starch choroshovase H (cvtosolic form starch phosphorylase, putative                  | 412  | 452  | 602  | 609  | 917  | 626  | 489  | 717  | 0.68     | 0.118990 | 541  | 444  | 485  | 501  | 553  | 472  | 654  | 639  | 490  | 563  | 0.87     | 0.211443 | 509  | 0.96     | 0.642923 |
| 252434_x_at | A13g47310 | putative protein nudrA protein - maize Mutator-like transposase family                | 182  | 219  | 255  | 252  | 237  | 221  | 218  | 237  | 0.92     | 0.465235 | 225  | 228  | 295  | 228  | 229  | 233  | 264  | 262  | 249  | 243  | 1.02     | 0.773658 | 230  | 1.08     | 0.451045 |
| 252435_at   | A13g47320 | putative protein several hypothetical on hypothetical protein /// Mutator-like trans  | 6    | 7    | 8    | 7    | 9    | 15   | 7    | 10   | 0.71     | 0.325277 | 3    | 5    | 5    | 2    | 3    | 4    | 3    | 4    | 5    | 3    | 1.32     | 0.140297 | 3    | 1.41     | 0.166972 |
| 252436_x_at | A13g47330 | putative protein several hypothetical on hypothetical protein /// hypothetical orde   | 31   | 36   | 39   | 38   | 44   | 46   | 36   | 45   | 0.81     | 0.011611 | 25   | 26   | 30   | 28   | 28   | 28   | 29   | 28   | 29   | 28   | 0.95     | 0.587306 | 29   | 0.89     | 0.048416 |
| 252437_at   | A13g47380 | putative protein predicted proteins, Ar expressed protein                             | 32   | 41   | 45   | 44   | 57   | 43   | 39   | 48   | 0.81     | 0.198556 | 43   | 41   | 38   | 29   | 27   | 24   | 32   | 23   | 40   | 27   | 1.50     | 0.001263 | 27   | 1.53     | 0.001903 |
| 252438_at   | A13g47390 | putative protein riboflavin biosynthesis (cvtidase/deoxycvridase deaminase fami       | 127  | 157  | 156  | 171  | 192  | 153  | 146  | 172  | 0.85     | 0.161716 | 129  | 112  | 127  | 176  | 166  | 137  | 179  | 162  | 123  | 164  | 0.75     | 0.008065 | 160  | 0.77     | 0.044741 |
| 252439_at   | A13g47400 | pectinesterase-like protein (pectinesterase) pectinesterase family protein            | 37   | 47   | 48   | 53   | 66   | 47   | 44   | 56   | 0.79     | 0.154469 | 36   | 37   | 36   | 40   | 47   | 33   | 46   | 46   | 36   | 42   | 0.85     | 0.116853 | 40   | 0.90     | 0.368623 |
| 252440_at   | A13g47440 | ascorquin-like protein ascocquin - Veni major intrinsic family protein / MIP fami     | 108  | 155  | 175  | 129  | 150  | 118  | 146  | 132  | 1.10     | 0.580390 | 114  | 122  | 127  | 103  | 142  | 123  | 121  | 103  | 134  | 118  | 0.85     | 0.060039 | 96   | 0.80     | 0.006808 |
| 252410_at   | A13g47450 | putative protein br-1 protein INTRIC C expressed protein                              | 111  | 153  | 129  | 148  | 173  | 127  | 131  | 149  | 0.88     | 0.360866 | 121  | 106  | 118  | 159  | 125  | 114  | 145  | 135  | 115  | 135  | 0.85     | 0.118689 | 132  | 0.87     | 0.201099 |
| 252411_at   | A13g47430 | putative protein PMP31 protein - Cande peroxisomal biogenesis factor 11 family        | 23   | 37   | 32   | 36   | 27   | 33   | 32   | 1.03 | 0.079038 | 23       | 24   | 25   | 26   | 21   | 26   | 24   | 19   | 24   | 23   | 1.03 | 0.715023 | 24       | 0.99 | 0.899363 |          |
| 252412_at   | A13g47295 | Expressed protein ; supported by full-length expressed protein                        | 157  | 318  | 281  | 175  | 153  | 128  | 252  | 152  | 1.66     | 0.119417 | 69   | 89   | 97   | 156  | 120  | 81   | 104  | 95   | 85   | 111  | 0.76     | 0.197346 | 119  | 0.71     | 0.215260 |
| 252413_at   | A13g47370 | 40S ribosomal protein S20-like protein 40S ribosomal protein S20 (RPS20B)             | 1707 | 1873 | 2003 | 1937 | 2000 | 1992 | 1861 | 1976 | 0.94     | 0.259911 | 1992 | 2136 | 2254 | 2697 | 2310 | 1997 | 2286 | 2243 | 2127 | 2307 | 0.92     | 0.304230 | 2335 | 0.91     | 0.391758 |
| 252414_at   | A13g47420 | putative protein sn-dlcvcrd-3-olhoscha olcvcrd-3-olhoscha transporter, puta           | 78   | 103  | 164  | 250  | 214  | 174  | 115  | 213  | 0.54     | 0.043113 | 100  | 69   | 109  | 171  | 120  | 107  | 150  | 136  | 93   | 137  | 0.68     | 0.043764 | 133  | 0.70     | 0.155735 |
| 252415_at   | A13g47460 | ultramine-dependent ascoraine synth ascoraine synthetase 1 (glutamine-hyd             | 649  | 1345 | 1583 | 883  | 1368 | 771  | 1192 | 1007 | 1.18     | 0.609827 | 779  | 886  | 585  | 411  | 566  | 446  | 545  | 546  | 750  | 503  | 1.49     | 0.017992 | 474  | 1.58     | 0.051067 |
| 252416_at   | A13g47460 | chromosome assembly protein hcmo: SMC2-like condensin, putative                       | 192  | 248  | 253  | 243  | 291  | 219  | 231  | 251  | 0.92     | 0.526162 | 175  | 144  | 209  | 208  | 182  | 166  | 190  | 186  | 176  | 186  | 0.94     | 0.541848 | 186  | 0.95     | 0.687055 |
| 252417_at   | A13g47480 | putative calcium-binding protein calcur calcium-binding EF hand family protein        | 20   | 28   | 42   | 29   | 34   | 28   | 30   | 30   | 0.99     | 0.979716 | 23   | 31   | 26   | 24   | 19   | 23   | 19   | 22   | 26   | 21   | 1.24     | 0.054086 | 22   | 1.20     | 0.178043 |
| 252418_at   | A13g47490 | hypothetical protein - HHN endonuclease domain-containing c                           | 145  | 243  | 224  | 204  | 256  | 183  | 204  | 214  | 0.95     | 0.707979 | 190  | 194  | 195  | 291  | 219  | 221  | 248  | 209  | 193  | 237  | 0.81     | 0.065387 | 244  | 0.79     | 0.099957 |
| 252419_at   | A13g47510 | putative protein - expressed protein                                                  | 25   | 36   | 32   | 45   | 40   | 39   | 31   | 41   | 0.76     | 0.058414 | 63   | 67   | 66   | 80   | 65   | 71   | 63   | 65   | 65   | 69   | 0.95     | 0.467035 | 72   | 0.91     | 0.239297 |
| 252420_at   | A13g47530 | putative protein several hypothetical on pentatricopeptide (PPR) repeat-containi      | 67   | 85   | 86   | 86   | 110  | 84   | 79   | 93   | 0.85     | 0.259864 | 59   | 52   | 69   | 78   | 78   | 65   | 73   | 63   | 92   | 75   | 0.77     | 0.047109 | 73   | 0.82     | 0.129111 |
| 252421_at   | A13g47540 | endonuclease-like protein BASIC END chitinase, putative                               | 61   | 89   | 84   | 105  | 105  | 100  | 78   | 103  | 0.76     | 0.046644 | 58   | 63   | 70   | 93   | 74   | 74   | 102  | 80   | 64   | 85   | 0.75     | 0.033949 | 80   | 0.79     | 0.076863 |
| 252422_at   | A13g47550 | putative protein PT1 - Arabidopsis tha zinc finger (C3HC4-type RING finger) fa        | 284  | 426  | 417  | 438  | 541  | 396  | 376  | 458  | 0.82     | 0.261252 | 455  | 539  | 425  | 676  | 515  | 503  | 525  | 473  | 473  | 538  | 0.88     | 0.269133 | 564  | 0.84     | 0.234529 |
| 252423_at   | A13g47590 | putative protein putative hydrolase - Ar esterase/ase/thioesterase family prote       | 170  | 221  | 224  | 297  | 312  | 239  | 205  | 283  | 0.73     | 0.052260 | 196  | 201  | 219  | 342  | 275  | 259  | 235  | 236  | 205  | 269  | 0.76     | 0.053359 | 292  | 0.70     | 0.030513 |
| 252424_at   | A13g47610 | putative protein activating signal contai expressed protein                           | 205  | 315  | 331  | 305  | 315  | 235  | 284  | 285  | 1.00     | 0.979135 | 170  | 190  | 206  | 263  | 190  | 196  | 230  | 235  | 189  | 223  | 0.85     | 0.131069 | 216  | 0.87     | 0.343942 |
| 252425_at   | A13g47620 | putative protein axin-induced basic h TCP family transcription factor, putative       | 50   | 102  | 73   | 69   | 81   | 61   | 75   | 70   | 1.06     | 0.797588 | 96   | 93   | 83   | 83   | 77   | 81   | 99   | 88   | 91   | 86   | 1.06     | 0.445655 | 80   | 1.13     | 0.073616 |
| 252426_at   | A13g47630 | putative protein protein transcrit helbe expressed protein                            | 434  | 187  | 204  | 187  | 203  | 164  | 175  | 185  | 0.95     | 0.711800 | 173  | 202  | 188  | 226  | 186  | 191  | 221  | 214  | 188  | 208  | 0.90     | 0.157652 | 201  | 0.93     | 0.423431 |
| 252427_at   | A13g47640 | hypothetical protein - basic helix-loop-helix (bHLH) family prot                      | 11   | 151  | 145  | 144  | 164  | 114  | 107  | 173  | 0.80     | 0.088033 | 111  | 12   | 140  | 121  | 176  | 140  | 130  | 138  | 140  | 127  | 0.85     | 0.158971 | 142  | 0.85     | 0.278925 |
| 252428_at   | A13g47660 | putative protein rls - Mus musculus, Ef regulator of chromosome condensation i        | 18   | 21   | 23   | 18   | 24   | 21   | 21   | 21   | 0.99     | 0.910985 | 16   | 18   | 21   | 16   | 15   | 16   | 18   | 16   | 18   | 16   | 1.13     | 0.169444 | 16   | 1.17     | 0.198183 |
| 252429_at   | A13g47700 | CHLOROPHYLL A-B BINDING protein chlorophyll A-B bindina protein 4, chloro             | 80   | 159  | 130  | 138  | 126  | 90   | 123  | 118  | 1.04     | 0.860210 | 90   | 89   | 79   | 174  | 108  | 104  | 119  | 116  | 86   | 126  | 0.68     | 0.050010 | 132  | 0.65     | 0.099655 |
| 252430_at   | A13g47740 | hypothetical protein - expressed protein                                              | 1841 | 3168 | 3302 | 2541 | 3039 | 2045 | 2770 | 2542 | 1.00     | 0.698014 | 2534 | 3158 | 2574 | 3457 | 3059 | 2911 | 3336 | 3171 | 2755 | 3195 | 0.86     | 0.063924 | 3156 | 0.87     | 0.194941 |
| 252431_at   | A13g47750 | hypothetical protein - expressed protein                                              | 138  | 198  | 181  | 186  | 150  | 157  | 173  | 0.91 | 0.534447 | 110      | 91   | 115  | 127  | 111  | 88   | 121  | 121  | 105  | 111  | 88   | 1.21     | 0.400615 | 111  | 0.95     | 0.707364 |
| 252432_at   | A13g47680 | hypothetical protein - expressed protein                                              | 9    | 12   | 11   | 12   | 13   | 14   | 11   | 13   | 0.83     | 0.101569 | 11   | 13   | 14   | 13   | 11   | 15   | 15   | 12   | 13   | 13   | 0.99     | 0.900726 | 13   | 1.00     | 0.975778 |
| 252433_at   | A13g47560 | putative protein putative hydrolase - Ar esterase/ase/thioesterase family orle        | 9    | 109  | 131  | 104  | 115  | 114  | 112  | 111  | 1.01     | 0.899792 | 66   | 73   | 82   | 89   | 66   | 60   | 81   | 73   | 74   | 74   | 1.00     | 0.984499 | 72   | 1.03     | 0.852994 |
| 252408_at   | A13g47670 | putative protein pectinesterase - Arabi invertease/pectin methyltransferase inhibitor | 88   | 100  | 119  | 116  | 119  | 99   | 105  | 111  | 0.94     | 0.583116 | 105  | 132  | 120  | 164  | 129  | 131  | 116  | 118  | 119  | 132  | 0.90     | 0.337380 | 141  | 0.84     | 0.176916 |
| 252407_at   | A13g47650 | chloroplast NAD-dependent malate deo malate dehydrogenase (NAD), chloropla            | 478  | 513  | 641  | 641  | 544  | 513  | 609  | 0.84 | 0.060922 | 443      | 419  | 490  | 701  | 582  | 521  | 576  | 538  | 451  | 584  | 577  | 0.77     | 0.024373 | 601  | 0.75     | 0.056154 |
| 252406_at   | A13g47600 | putative transcription factor MYB94 - sc myb family transcription factor (MYB94)      | 173  | 204  | 268  | 247  | 307  | 220  | 215  | 258  | 0.83     | 0.315449 | 205  | 236  | 227  | 355  | 294  | 312  | 275  | 286  | 223  | 305  | 0.73     | 0.006385 | 321  | 0.70     | 0.008590 |
| 252409_at   | A13g47650 | putative protein bundle sheath defectiv bundle-sheath defective protein 2 family      | 264  | 407  | 394  | 420  | 417  | 308  | 382  | 382  | 1.00     | 0.998683 | 314  | 341  | 374  | 419  | 317  | 335  | 334  | 334  | 343  | 344  | 0.99     | 0.860129 | 357  | 0.96     | 0.071742 |
| 252378_at   | A13g47570 | receptor kinase-like protein shn1 leucine-rich repeat transmembrane prot              | 51   | 58   | 76   | 72   | 83   | 70   | 62   | 75   | 0.82     | 0.194174 | 33   | 40   | 50   | 44   | 39   | 43   | 47   | 39   | 41   | 42   | 0.98     | 0.834492 | 42   | 0.99     | 0.915302 |
| 252379_at   | A13g47720 | ABC-type transport protein-like protein ABC transporter family protein                | 150  | 155  | 181  | 172  | 222  | 148  | 162  | 181  | 0.80     | 0.477112 | 110  | 94   | 110  | 124  | 106  | 83   | 116  | 110  | 104  | 108  | 0.87     | 0.723942 | 104  | 1.00     | 0.998044 |
| 252380_at   | A13g47740 | ABC-type transport protein-like protein ABC transporter family protein                | 15   | 18   | 13   | 14   | 15   | 16   | 12   | 13   | 0.92     | 0.761723 | 8    | 8    | 14   | 8    | 9    | 9    | 10   | 9    | 9    | 9    | 1.09     | 0.078113 | 9    | 1.00     | 0.773524 |
| 252381_x_at | A13g47750 | ABC-type transport protein-like protein ABC transporter family protein                | 19   | 19   | 43   | 24   | 29   | 23   | 27   | 26   | 1.06     | 0.851000 | 12   | 16   | 12   | 17   | 12   | 9    | 14   | 14   | 13   | 13   | 1.01     | 0.945171 | 13   | 1.04     | 0.856099 |
| 252382_at   | A13g47770 | ABC-type transport protein-like protein ABC transporter family protein                | 21   | 19   | 28   | 29   | 25   | 23   | 23   | 26   | 0.87     | 0.352349 | 18   | 23   | 21   | 17   | 15   | 19   | 18   | 20   | 20   | 18   | 1.14     | 0.175504 | 17   | 1.19     | 0.164725 |
| 252383_at   | A13g47780 | ABC-type transport protein-like protein ABC transporter family protein                | 30   | 27   | 34   | 33   | 32   | 30   | 30   | 32   | 0.96     | 0.579253 | 22   | 24   | 28   | 27   | 19   | 21   | 22   | 25   | 24   | 23   | 1.07     | 0.497691 | 22   | 1.09     | 0.519983 |
| 252384_at   | A13g47790 | ABC-type transport protein-like protein ABC transporter family protein                | 12   | 12   | 15   | 14   | 15   | 14   | 12   | 15   | 0.78     | 0.128133 | 11   | 10   | 15   | 14   | 11   | 11   | 14   | 10   | 12   | 14   | 1.11     | 0.491525 | 12   | 1.00     | 0.953267 |
| 252385_at   | A13g47810 | putative protein Vos29, Schizosacchar calneculin-like choshooesterase family          | 681  | 756  | 757  | 904  | 968  | 796  | 731  | 890  | 0.82     | 0.476022 | 88   |      |      |      |      |      |      |      |      |      |          |          |      |          |          |

|             |           |                                            |                                                                                   |      |      |      |      |      |      |      |      |      |           |      |      |      |      |      |      |      |      |      |      |          |          |      |          |          |
|-------------|-----------|--------------------------------------------|-----------------------------------------------------------------------------------|------|------|------|------|------|------|------|------|------|-----------|------|------|------|------|------|------|------|------|------|------|----------|----------|------|----------|----------|
| 252370_at   | A13g48600 | putative protein                           | SWIB complex BAF60b domain-containing                                             | 91   | 117  | 117  | 122  | 158  | 114  | 108  | 131  | 0.83 | 0.228624  | 109  | 87   | 105  | 145  | 125  | 115  | 118  | 107  | 100  | 122  | 0.82     | 0.070363 | 128  | 0.78     | 0.062136 |
| 252343_at   | A13g48610 | putative protein                           | hypothetical protein F1 phosphotransferase family protein                         | 289  | 260  | 276  | 440  | 461  | 367  | 275  | 423  | 0.65 | 0.007867  | 311  | 283  | 323  | 545  | 466  | 370  | 498  | 469  | 306  | 470  | 0.65     | 0.005750 | 461  | 0.66     | 0.040596 |
| 252344_s_at | A13g48620 | putative protein                           | chondroectodermatous membrane protein-rela                                        | 122  | 214  | 239  | 180  | 251  | 163  | 199  | 198  | 1.00 | 0.992608  | 188  | 183  | 161  | 209  | 202  | 191  | 206  | 181  | 177  | 198  | 0.90     | 0.068890 | 201  | 0.88     | 0.072783 |
| 252345_at   | A13g48640 | hypothetical protein                       | expressed protein                                                                 | 22   | 20   | 26   | 26   | 26   | 23   | 20   | 23   | 0.79 | 0.139638  | 19   | 22   | 19   | 19   | 18   | 18   | 17   | 19   | 18   | 17   | 0.942501 | 17       | 0.91 | 0.11897  |          |
| 252346_at   | A13g48650 | hypothetical protein                       | phleogedone, AT14a-related protein                                                | 25   | 20   | 19   | 26   | 26   | 23   | 21   | 25   | 0.86 | 0.160382  | 15   | 20   | 14   | 15   | 20   | 13   | 15   | 17   | 17   | 16   | 1.05     | 0.064955 | 14   | 1.12     | 0.443991 |
| 252315_at   | A13g48690 | putative protein PMcC3 - Pinus radiata     | expressed protein                                                                 | 272  | 383  | 527  | 332  | 299  | 229  | 394  | 287  | 1.37 | 0.250516  | 294  | 338  | 373  | 539  | 324  | 329  | 379  | 374  | 335  | 389  | 0.86     | 0.359705 | 397  | 0.84     | 0.448312 |
| 252316_at   | A13g48700 | putative protein PMcC3 - Pinus radiata     | putative protein PMcC3 - Pinus radiata.l                                          | 278  | 43   | 69   | 50   | 58   | 49   | 50   | 52   | 0.95 | 0.820179  | 37   | 34   | 40   | 64   | 48   | 37   | 45   | 37   | 46   | 48   | 0.81     | 0.231071 | 49   | 0.75     | 0.205634 |
| 252317_at   | A13g48710 | putative protein                           | transverse family protein                                                         | 28   | 28   | 37   | 38   | 29   | 30   | 31   | 37   | 0.85 | 0.159133  | 29   | 30   | 35   | 25   | 31   | 31   | 22   | 31   | 22   | 31   | 1.12     | 0.241103 | 37   | 0.81     | 0.198711 |
| 252318_at   | A13g48730 | putative protein                           | glutamate-1-semialdehyde aminotransferase                                         | 267  | 391  | 324  | 385  | 439  | 357  | 327  | 393  | 0.83 | 0.202496  | 345  | 279  | 308  | 456  | 380  | 347  | 390  | 387  | 311  | 392  | 0.79     | 0.025226 | 395  | 0.79     | 0.089432 |
| 252319_at   | A13g48710 | putative protein                           | osulvone - Arab                                                                   | 256  | 364  | 440  | 450  | 518  | 376  | 353  | 448  | 0.79 | 0.234429  | 235  | 253  | 298  | 435  | 328  | 311  | 316  | 262  | 344  | 476  | 0.75     | 0.051075 | 398  | 0.73     | 0.091536 |
| 252320_at   | A13g48580 | putative protein                           | endoxylolucan transferase-like protein                                            | 635  | 729  | 864  | 342  | 335  | 267  | 743  | 315  | 2.36 | 0.003795  | 1020 | 1345 | 1164 | 876  | 859  | 608  | 766  | 723  | 1176 | 766  | 1.53     | 0.004917 | 781  | 1.51     | 0.036585 |
| 252321_at   | A13g48510 | putative protein                           | hypothetical protein                                                              | 128  | 164  | 567  | 211  | 253  | 261  | 283  | 242  | 1.17 | 0.779917  | 76   | 73   | 92   | 121  | 110  | 118  | 136  | 130  | 80   | 123  | 0.55     | 0.001403 | 116  | 0.69     | 0.006622 |
| 252322_at   | A13g48550 | putative protein                           | putative zinc-finger prc expressed protein                                        | 54   | 67   | 57   | 50   | 70   | 57   | 59   | 59   | 1.00 | 0.50238   | 44   | 48   | 49   | 49   | 38   | 34   | 31   | 47   | 37   | 1.26 | 0.071211 | 41       | 1.16 | 0.246821 |          |
| 252323_at   | A13g48530 | putative protein                           | probable transcription CBS domain-containing protein                              | 504  | 769  | 1022 | 454  | 622  | 400  | 766  | 492  | 1.56 | 0.169324  | 570  | 737  | 517  | 690  | 599  | 620  | 757  | 733  | 608  | 680  | 0.89     | 0.303314 | 636  | 0.96     | 0.715686 |
| 252324_at   | A13g48565 | putative protein                           | translocation complex secE1 or protein transport protein SEC61 gamma              | 278  | 265  | 250  | 247  | 232  | 213  | 263  | 231  | 1.14 | 0.055923  | 166  | 227  | 254  | 358  | 233  | 180  | 247  | 258  | 216  | 255  | 0.84     | 0.394341 | 257  | 0.84     | 0.523157 |
| 252325_at   | A13g48560 | putative protein                           | acetylacetyl synthase - supported by ac acetylacetyl synthase, chloroplast / acet | 892  | 1174 | 1156 | 1123 | 1152 | 909  | 1074 | 1061 | 1.01 | 0.925057  | 1039 | 994  | 1086 | 1440 | 1058 | 1019 | 1278 | 1284 | 1040 | 1216 | 0.86     | 0.148575 | 1172 | 0.89     | 0.388693 |
| 252326_at   | A13g48680 | putative protein                           | ferrioxalochelin binding / bacterial transferrin hexoseotide repeat               | 598  | 527  | 565  | 607  | 735  | 505  | 496  | 54   | 0.88 | 0.234546  | 565  | 687  | 656  | 967  | 727  | 699  | 666  | 654  | 843  | 743  | 0.87     | 0.257702 | 798  | 0.81     | 0.160916 |
| 252327_at   | A13g48740 | putative protein                           | MTN3-like protein MN3 gene product - nucleotid MN3 family protein                 | 27   | 31   | 37   | 33   | 35   | 30   | 32   | 32   | 0.98 | 0.0851010 | 27   | 24   | 30   | 34   | 31   | 26   | 29   | 32   | 27   | 31   | 0.88     | 0.149640 | 30   | 0.88     | 0.290266 |
| 252328_at   | A13g48570 | Expressed protein                          | supported by cDNV protein transport protein SEC61 gamma                           | 458  | 471  | 498  | 432  | 483  | 366  | 475  | 427  | 1.11 | 0.250041  | 435  | 429  | 450  | 622  | 506  | 466  | 460  | 432  | 438  | 497  | 0.88     | 0.236259 | 531  | 0.82     | 0.120512 |
| 252329_at   | A13g48760 | putative protein                           | several hypothetical on zinc finger (DHHC type) family protein                    | 252  | 295  | 347  | 396  | 413  | 309  | 298  | 373  | 0.80 | 0.151126  | 181  | 160  | 193  | 368  | 294  | 268  | 301  | 293  | 178  | 305  | 0.58     | 0.001677 | 310  | 0.57     | 0.013990 |
| 252330_at   | A13g48770 | hypothetical protein                       | hypothetical protein                                                              | 27   | 33   | 30   | 69   | 73   | 34   | 30   | 69   | 0.44 | 0.002036  | 36   | 32   | 34   | 71   | 57   | 51   | 67   | 72   | 34   | 64   | 0.53     | 0.001548 | 60   | 0.57     | 0.012133 |
| 252331_s_at | A13g48790 | serine palmitoyltransferase-like protein   | serine C-alpha-oxido transferase, putative /                                      | 176  | 213  | 203  | 217  | 257  | 184  | 197  | 219  | 0.90 | 0.411988  | 159  | 132  | 145  | 212  | 169  | 142  | 223  | 207  | 146  | 191  | 0.76     | 0.075263 | 174  | 0.83     | 0.256967 |
| 252332_at   | A13g48810 | putative protein                           | centriole-associated (PPR) repeat-containing                                      | 45   | 58   | 52   | 57   | 64   | 52   | 51   | 58   | 0.89 | 0.280907  | 49   | 47   | 48   | 42   | 41   | 41   | 41   | 43   | 42   | 45   | 1.09     | 0.061368 | 41   | 1.11     | 0.104460 |
| 252333_at   | A13g48830 | putative protein                           | N-Terminal; several on polynucleotide adenine transferase family                  | 17   | 19   | 22   | 22   | 26   | 17   | 20   | 22   | 0.91 | 0.525304  | 16   | 16   | 17   | 18   | 19   | 15   | 19   | 14   | 16   | 17   | 0.97     | 0.176519 | 17   | 0.94     | 0.418201 |
| 252334_at   | A13g48850 | mitochondrial phosphate transporter m      | mitochondrial phosphate transporter, pu                                           | 43   | 43   | 49   | 49   | 42   | 45   | 42   | 49   | 0.57 | 0.215677  | 38   | 32   | 46   | 40   | 36   | 36   | 34   | 37   | 39   | 37   | 1.05     | 0.567182 | 37   | 1.04     | 0.771629 |
| 252335_at   | A13g48860 | putative protein                           | N-Terminal; several on polynucleotide adenine transferase family                  | 163  | 227  | 233  | 251  | 268  | 215  | 208  | 244  | 0.85 | 0.205159  | 180  | 170  | 182  | 226  | 201  | 170  | 222  | 213  | 177  | 206  | 0.86     | 0.078136 | 199  | 0.89     | 0.202616 |
| 252336_at   | A13g48880 | putative protein                           | N7 protein - Medicago F-box family protein                                        | 177  | 265  | 287  | 279  | 295  | 232  | 243  | 268  | 0.91 | 0.546265  | 264  | 307  | 279  | 407  | 334  | 286  | 281  | 274  | 283  | 316  | 0.90     | 0.373559 | 342  | 0.83     | 0.186704 |
| 252337_at   | A13g48750 | CELL DIVISION CONTROL PROTEIN              | cell division control protein 2 homolog A                                         | 369  | 487  | 512  | 557  | 618  | 468  | 456  | 548  | 0.83 | 0.212767  | 465  | 518  | 499  | 788  | 610  | 558  | 559  | 519  | 494  | 607  | 0.81     | 0.129432 | 652  | 0.76     | 0.090382 |
| 252338_at   | A13g48890 | putative protein                           | croacetone-binding protein h                                                      | 326  | 466  | 503  | 541  | 625  | 513  | 432  | 560  | 0.77 | 0.114040  | 583  | 743  | 588  | 846  | 682  | 676  | 553  | 558  | 638  | 663  | 0.96     | 0.767745 | 735  | 0.87     | 0.274889 |
| 252339_at   | A13g48910 | hypothetical protein                       | expressed protein                                                                 | 56   | 75   | 69   | 65   | 66   | 56   | 52   | 62   | 0.83 | 0.063335  | 49   | 46   | 57   | 60   | 54   | 46   | 53   | 59   | 60   | 56   | 0.93     | 0.27971  | 54   | 0.93     | 0.528473 |
| 252340_at   | A13g48920 | myb-like protein                           | myb family transcription factor (MYB45)                                           | 36   | 49   | 52   | 57   | 62   | 49   | 46   | 56   | 0.81 | 0.159702  | 36   | 42   | 37   | 55   | 38   | 44   | 41   | 39   | 39   | 44   | 0.88     | 0.272477 | 46   | 0.84     | 0.228646 |
| 252341_at   | A13g48940 | remorin-like protein                       | remorin, Solanum remorin family protein                                           | 22   | 25   | 30   | 35   | 30   | 31   | 26   | 32   | 0.81 | 0.085890  | 22   | 25   | 27   | 32   | 21   | 23   | 24   | 24   | 25   | 25   | 0.99     | 0.956239 | 25   | 0.98     | 0.874967 |
| 252342_at   | A13g48950 | endo-polygalacturonase - like protein      | endo-alpha-D-glucosidase hydrolase family 28 protein / p                          | 268  | 408  | 368  | 299  | 35   | 26   | 348  | 30   | 1.62 | 0.001576  | 561  | 642  | 605  | 25   | 23   | 33   | 27   | 23   | 203  | 26   | 23.33    | 0.000000 | 27   | 22.64    | 0.000017 |
| 252343_s_at | A13g48960 | 60S ribosomal protein L13 (B6C1) - like    | 60S ribosomal protein L13 (RPL13C)                                                | 40   | 45   | 58   | 52   | 53   | 47   | 48   | 54   | 0.88 | 0.302787  | 30   | 44   | 42   | 58   | 38   | 38   | 37   | 36   | 38   | 47   | 1.03     | 0.823214 | 148  | 1.01     | 0.645743 |
| 252344_at   | A13g49020 | putative protein                           | various predicted orot F-box family protein                                       | 57   | 65   | 72   | 80   | 86   | 61   | 65   | 75   | 0.86 | 0.288045  | 53   | 47   | 58   | 78   | 57   | 56   | 68   | 59   | 53   | 64   | 0.83     | 0.115893 | 64   | 0.82     | 0.227413 |
| 252345_at   | A13g49050 | calmodulin-binding heat-shock - like       | or lysase class 3 family protein / calmodulin                                     | 155  | 169  | 178  | 179  | 198  | 156  | 167  | 178  | 0.94 | 0.488200  | 170  | 147  | 176  | 215  | 185  | 152  | 159  | 175  | 164  | 177  | 0.93     | 0.450048 | 184  | 0.89     | 0.379824 |
| 252346_at   | A13g49070 | putative protein                           | expressed protein                                                                 | 35   | 41   | 52   | 47   | 51   | 49   | 42   | 49   | 0.86 | 0.260293  | 30   | 32   | 41   | 34   | 44   | 32   | 41   | 39   | 34   | 38   | 0.90     | 0.384295 | 37   | 0.94     | 0.678272 |
| 252347_at   | A13g49080 | 30S ribosomal protein S9 - like            | similar to 30S ribosomal protein S9 family protein                                | 429  | 507  | 487  | 594  | 599  | 498  | 307  | 664  | 0.93 | 0.077169  | 403  | 373  | 435  | 658  | 440  | 431  | 468  | 431  | 404  | 468  | 0.92     | 0.196568 | 514  | 0.93     | 0.238825 |
| 252348_at   | A13g49090 | hypothetical protein                       | ribosomal protein S9 family protein                                               | 187  | 182  | 212  | 279  | 281  | 238  | 194  | 266  | 0.73 | 0.013160  | 109  | 131  | 131  | 131  | 128  | 138  | 127  | 131  | 124  | 145  | 0.85     | 0.322789 | 156  | 0.80     | 0.257035 |
| 252349_at   | A13g49130 | putative protein                           | ore-mRNA solinoic facta hypothetical protein                                      | 30   | 27   | 35   | 40   | 37   | 37   | 30   | 38   | 0.80 | 0.041671  | 22   | 24   | 25   | 27   | 30   | 20   | 21   | 29   | 26   | 24   | 2.08     | 0.884015 | 22   | 1.08     | 0.515016 |
| 252350_at   | A13g49140 | putative protein                           | various predicted orot pentatricopeptide (PPR) repeat-containing                  | 185  | 331  | 348  | 314  | 374  | 287  | 288  | 325  | 0.89 | 0.557899  | 192  | 216  | 217  | 302  | 213  | 221  | 281  | 273  | 209  | 258  | 0.81     | 0.088715 | 245  | 0.85     | 0.282799 |
| 252351_s_at | A13g49120 | peroxidase                                 | supported by full-length cDNA peroxidase 33 (PER33) (P33) (PRXAC)                 | 23   | 66   | 101  | 76   | 80   | 91   | 36   | 89   | 0.40 | 0.038581  | 9    | 9    | 9    | 59   | 46   | 39   | 48   | 39   | 46   | 48   | 0.9      | 0.241775 | 48   | 0.19     | 0.002747 |
| 252352_at   | A13g49000 | RNA polymerase III subunit - like          | protein RNA polymerase subunit RPOC2 fami                                         | 204  | 289  | 294  | 298  | 331  | 246  | 246  | 292  | 0.84 | 0.230114  | 143  | 109  | 135  | 170  | 136  | 129  | 143  | 136  | 145  | 0.90 | 0.445214 | 145      | 0.89 | 0.386521 |          |
| 252353_at   | A13g48990 | 4-oxoacetate-CoA ligase - like             | protein 4 AMP-dependent synthetase and ligase f                                   | 243  | 314  | 394  | 476  | 345  | 258  | 317  | 360  | 0.88 | 0.611232  | 311  | 332  | 291  | 354  | 293  | 354  | 321  | 311  | 323  | 323  | 0.96     | 0.615655 | 305  | 1.02     | 0.843534 |
| 252354_at   | A13g49010 | 60S ribosomal protein L13 (B6C1) - like    | 60S ribosomal protein L13 (RPL13B) / b                                            | 3660 | 4053 | 4380 | 4465 | 4501 | 4287 | 4033 | 4418 | 0.91 | 0.150708  | 3231 | 4012 | 4225 | 5058 | 3798 | 3263 | 4366 | 4345 | 3823 | 4166 | 0.92     | 0.482530 | 4040 | 0.95     | 0.741050 |
| 252355_at   | A13g49100 | sional recognition particle subunit 9 - II | sional recognition particle 9 Kda protein                                         | 210  | 236  | 242  | 226  | 249  | 209  | 230  | 228  | 1.01 | 0.912801  | 262  | 259  | 254  | 335  | 275  | 264  | 285  | 267  | 255  | 285  | 0.89     | 0.133884 | 291  | 0.88     | 0.179312 |
| 252356_at   | A13g49070 | putative protein                           | CRP77 leucine-rich repeat family protein                                          | 42   | 47   | 63   | 65   |      |      |      |      |      |           |      |      |      |      |      |      |      |      |      |      |          |          |      |          |          |

|           |           |                                                                                     |      |      |      |      |          |      |      |      |          |          |      |      |      |      |      |      |      |      |      |      |          |          |      |          |          |
|-----------|-----------|-------------------------------------------------------------------------------------|------|------|------|------|----------|------|------|------|----------|----------|------|------|------|------|------|------|------|------|------|------|----------|----------|------|----------|----------|
| 252247_at | A13g49740 | putative protein various predicted prote peptidase/leucine-rich repeat-containing   | 83   | 108  | 125  | 113  | 140      | 108  | 106  | 120  | 0.88     | 0.404760 | 85   | 76   | 113  | 82   | 75   | 82   | 97   | 90   | 91   | 85   | 1.08     | 0.521452 | 80   | 1.15     | 0.353464 |
| 252248_at | A13g49750 | putative protein resistance gene Hcr2-1 peucine-rich repeat family protein          | 57   | 61   | 66   | 69   | 81       | 66   | 61   | 72   | 0.85     | 0.123393 | 54   | 61   | 64   | 85   | 59   | 62   | 62   | 48   | 60   | 64   | 0.93     | 0.592584 | 71   | 0.84     | 0.235224 |
| 252249_at | A13g49770 | putative protein heat shock protein 108 hypothetical protein                        | 45   | 64   | 62   | 61   | 55       | 56   | 54   | 61   | 0.88     | 0.257643 | 28   | 37   | 32   | 32   | 33   | 31   | 43   | 32   | 32   | 34   | 0.95     | 0.626673 | 32   | 1.01     | 0.894889 |
| 252250_at | A13g49790 | putative protein predicted protein Arat hypothetical protein                        | 59   | 67   | 56   | 74   | 45       | 69   | 61   | 72   | 0.87     | 0.156277 | 45   | 45   | 43   | 41   | 43   | 48   | 45   | 40   | 45   | 48   | 0.90     | 0.162616 | 45   | 0.88     | 0.381622 |
| 252251_at | A13g49820 | hypothetical protein                                                                | 21   | 20   | 27   | 26   | 23       | 25   | 23   | 25   | 0.91     | 0.430441 | 15   | 22   | 26   | 20   | 19   | 18   | 18   | 18   | 21   | 18   | 1.14     | 0.333880 | 18   | 1.13     | 0.506440 |
| 252222_at | A13g49830 | RuvB DNA helicase - like protein DNA DNA helicase-related                           | 28   | 31   | 39   | 44   | 37       | 39   | 32   | 40   | 0.82     | 0.127043 | 26   | 21   | 29   | 32   | 31   | 30   | 31   | 29   | 25   | 31   | 0.83     | 0.023556 | 31   | 0.82     | 0.069027 |
| 252221_at | A13g49840 | putative protein various predicted prot proline-rich family protein                 | 47   | 64   | 65   | 74   | 75       | 58   | 58   | 69   | 0.84     | 0.248012 | 42   | 39   | 50   | 50   | 45   | 43   | 46   | 43   | 44   | 45   | 0.96     | 0.583622 | 46   | 0.95     | 0.619542 |
| 252223_at | A13g49850 | MYB-like protein DNA-binding protein DNA-binding transcription factor               | 96   | 112  | 106  | 149  | 136      | 118  | 139  | 0.85 | 0.146256 | 120      | 135  | 130  | 135  | 129  | 139  | 129  | 133  | 144  | 132  | 138  | 1.02     | 0.302662 | 144  | 0.92     | 0.341830 |
| 252224_at | A13g49860 | putative protein various ADP-RIBOSYL ADP-ribosylation factor, putative              | 35   | 36   | 51   | 43   | 49       | 45   | 41   | 46   | 0.89     | 0.056802 | 30   | 36   | 41   | 38   | 28   | 35   | 39   | 31   | 36   | 34   | 1.04     | 0.701758 | 34   | 1.06     | 0.653835 |
| 252225_at | A13g49870 | ADP-RIBOSYLATION FACTOR -like o ADP-ribosylation factor, putative                   | 310  | 443  | 456  | 447  | 506      | 380  | 403  | 444  | 0.91     | 0.521513 | 397  | 533  | 468  | 631  | 475  | 485  | 466  | 506  | 496  | 506  | 0.92     | 0.467698 | 530  | 0.88     | 0.396088 |
| 252226_at | A13g49880 | putative protein transcribed one of un glycosyl hydrolase family protein 43         | 96   | 151  | 146  | 200  | 211      | 164  | 131  | 192  | 0.68     | 0.056176 | 84   | 74   | 94   | 136  | 113  | 107  | 114  | 105  | 84   | 115  | 0.73     | 0.009901 | 119  | 0.71     | 0.029420 |
| 252227_at | A13g49890 | putative protein various predicted crot STBPC2 domain-containing protein            | 196  | 238  | 217  | 217  | 250      | 209  | 217  | 225  | 0.90     | 0.662911 | 199  | 234  | 225  | 336  | 239  | 220  | 249  | 243  | 220  | 258  | 0.85     | 0.228812 | 265  | 0.83     | 0.294273 |
| 252228_at | A13g49900 | porin - like protein porin, Mesembrent porin, putative                              | 43   | 59   | 56   | 80   | 86       | 65   | 52   | 77   | 0.68     | 0.039011 | 65   | 68   | 67   | 104  | 87   | 75   | 69   | 67   | 81   | 0.82 | 0.137691 | 89       | 0.75 | 0.065490 |          |
| 252229_at | A13g49980 | putative protein lea32, Arabidopsis the expressed protein                           | 159  | 219  | 209  | 224  | 274      | 205  | 196  | 234  | 0.84     | 0.235561 | 243  | 292  | 272  | 389  | 285  | 293  | 232  | 239  | 269  | 288  | 0.94     | 0.649902 | 322  | 0.83     | 0.216550 |
| 252230_at | A13g49810 | putative protein various predicted prot U-box domain-containing protein             | 119  | 182  | 165  | 203  | 213      | 172  | 155  | 196  | 0.79     | 0.142173 | 136  | 136  | 147  | 187  | 152  | 151  | 169  | 159  | 140  | 164  | 0.86     | 0.042283 | 163  | 0.86     | 0.130591 |
| 252231_at | A13g49720 | hypothetical protein - supported by full-length cDNA - expressed protein            | 1260 | 1000 | 1203 | 1514 | 1624     | 1321 | 1154 | 1486 | 0.78     | 0.048969 | 1047 | 1107 | 1130 | 1557 | 1326 | 1141 | 1161 | 1121 | 1095 | 1261 | 0.87     | 0.184866 | 1341 | 0.82     | 0.114641 |
| 252232_at | A13g49760 | bZIP transcription factor - like protein bZIP transcription factor family protein   | 30   | 32   | 37   | 33   | 38       | 36   | 33   | 35   | 0.93     | 0.354786 | 33   | 35   | 40   | 35   | 27   | 34   | 37   | 31   | 36   | 33   | 1.10     | 0.288805 | 32   | 1.13     | 0.257431 |
| 252233_at | A13g49690 | AMYB84 - supported by full-length cDN myb family transcription factor               | 21   | 26   | 24   | 26   | 32       | 26   | 24   | 28   | 0.85     | 0.071960 | 23   | 23   | 24   | 22   | 20   | 19   | 22   | 22   | 23   | 21   | 1.11     | 0.064485 | 20   | 1.16     | 0.046806 |
| 252234_at | A13g49780 | putative protein - supported by full-length ribosulfolikines 3 (PSK3)               | 7    | 10   | 34   | 8    | 7        | 10   | 17   | 9    | 0.99     | 0.386279 | 140  | 181  | 167  | 48   | 45   | 37   | 45   | 39   | 163  | 43   | 3.81     | 0.000014 | 43   | 3.78     | 0.000716 |
| 252235_at | A13g49910 | 60S RIBOSOMAL PROTEIN - like 60S ribosomal protein L26 (RPL26A)                     | 3379 | 3935 | 4179 | 4142 | 4346     | 3936 | 3831 | 4141 | 0.93     | 0.306385 | 3321 | 3591 | 3618 | 4500 | 3570 | 3296 | 3895 | 3995 | 3510 | 3851 | 0.91     | 0.269309 | 3789 | 0.93     | 0.500181 |
| 252236_at | A13g49930 | zinc-finger-like protein Cys2/His2-type zinc finger (C2H2 type) family protein      | 66   | 79   | 76   | 79   | 69       | 67   | 75   | 90   | 0.70     | 0.338875 | 55   | 63   | 59   | 79   | 66   | 64   | 81   | 68   | 59   | 72   | 0.82     | 0.038168 | 70   | 0.85     | 0.090580 |
| 252237_at | A13g49950 | putative protein lateral suppressor crot scarcewron transcription factor family pro | 34   | 32   | 51   | 43   | 44       | 46   | 39   | 44   | 0.87     | 0.404108 | 27   | 31   | 38   | 26   | 26   | 22   | 33   | 23   | 32   | 26   | 1.23     | 0.147582 | 25   | 1.30     | 0.109609 |
| 252238_at | A13g49960 | peroxidase ATP21a peroxidase, putative                                              | 32   | 15   | 14   | 18   | 16       | 20   | 21   | 18   | 1.16     | 0.658486 | 13   | 17   | 17   | 16   | 12   | 14   | 16   | 13   | 15   | 14   | 1.06     | 0.544892 | 14   | 1.08     | 0.557025 |
| 252239_at | A13g49990 | putative protein glutathione - Dros expressed protein                               | 232  | 258  | 289  | 298  | 327      | 285  | 259  | 303  | 0.86     | 0.098910 | 242  | 247  | 263  | 340  | 289  | 252  | 307  | 277  | 251  | 293  | 0.86     | 0.082993 | 294  | 0.85     | 0.071936 |
| 252240_at | A13g50010 | putative protein several hypothetical on DC1 domain-containing protein              | 30   | 36   | 50   | 47   | 57       | 45   | 39   | 50   | 0.78     | 0.195779 | 28   | 23   | 30   | 25   | 21   | 27   | 24   | 27   | 27   | 25   | 1.09     | 0.274672 | 25   | 1.11     | 0.349762 |
| 252241_at | A13g50050 | putative protein CND41, chloroplast nu aspartyl protease family protein             | 89   | 92   | 102  | 120  | 142      | 105  | 94   | 122  | 0.77     | 0.072569 | 85   | 85   | 99   | 119  | 106  | 93   | 104  | 93   | 90   | 103  | 0.87     | 0.125654 | 106  | 0.85     | 0.145459 |
| 252242_at | A13g50080 | F-box protein family, AtFBL16 contains F-box family protein (FBL16)                 | 229  | 300  | 357  | 346  | 411      | 307  | 295  | 355  | 0.83     | 0.281542 | 186  | 153  | 194  | 243  | 202  | 181  | 216  | 206  | 178  | 209  | 0.85     | 0.101616 | 208  | 0.85     | 0.238972 |
| 252243_at | A13g50120 | putative protein some putative proteins - expressed protein                         | 10   | 10   | 9    | 7    | 10       | 10   | 9    | 9    | 1.05     | 0.640432 | 8    | 7    | 9    | 6    | 9    | 7    | 8    | 7    | 9    | 7    | 1.06     | 0.624935 | 7    | 1.11     | 0.451332 |
| 252244_at | A13g50130 | putative protein some putative proteins - expressed protein                         | 8    | 11   | 17   | 17   | 15       | 15   | 12   | 16   | 0.76     | 0.251929 | 13   | 18   | 18   | 13   | 17   | 16   | 21   | 13   | 17   | 16   | 1.02     | 0.882025 | 16   | 1.06     | 0.844335 |
| 252217_at | A13g50140 | putative protein some putative proteins - expressed protein                         | 11   | 12   | 14   | 14   | 16       | 14   | 15   | 14   | 0.75     | 0.259012 | 11   | 7    | 10   | 9    | 9    | 8    | 11   | 10   | 10   | 11   | 0.97     | 0.615261 | 10   | 1.01     | 0.948857 |
| 252218_at | A13g50150 | putative protein some putative proteins - expressed protein                         | 10   | 12   | 14   | 16   | 15       | 13   | 12   | 14   | 0.83     | 0.105893 | 11   | 10   | 15   | 10   | 10   | 10   | 10   | 9    | 12   | 12   | 1.10     | 0.323355 | 10   | 1.17     | 0.323048 |
| 252219_at | A13g50160 | putative protein some putative proteins - hypothetical protein                      | 20   | 16   | 24   | 27   | 23       | 24   | 20   | 24   | 0.81     | 0.155042 | 18   | 19   | 25   | 22   | 19   | 19   | 21   | 21   | 21   | 20   | 1.04     | 0.660889 | 20   | 1.07     | 0.583189 |
| 252220_at | A13g49940 | putative protein hypothetical protein - / LOB domain protein 38 / lateral oran b    | 172  | 177  | 251  | 280  | 268      | 249  | 200  | 266  | 0.75     | 0.072391 | 121  | 116  | 149  | 167  | 162  | 151  | 157  | 150  | 129  | 161  | 0.80     | 0.032041 | 167  | 0.77     | 0.064215 |
| 252180_at | A13g50070 | cycin D3-like protein Nicotiana tabacum cycin famod protein                         | 1497 | 1529 | 1638 | 1752 | 2076     | 1414 | 1571 | 1758 | 0.90     | 0.414837 | 1602 | 1513 | 1658 | 2040 | 1818 | 1741 | 1827 | 1707 | 1591 | 1827 | 0.87     | 0.030215 | 1866 | 0.85     | 0.050166 |
| 252190_at | A13g50170 | putative protein various predicted ene hypothetical protein                         | 19   | 20   | 22   | 21   | 20       | 19   | 21   | 0.94 | 0.193986 | 15       | 14   | 17   | 20   | 19   | 15   | 26   | 20   | 15   | 20   | 0.75 | 0.081780 | 18       | 0.83 | 0.182386 |          |
| 252191_at | A13g50180 | putative protein various predicted ene hypothetical protein                         | 16   | 19   | 22   | 23   | 27       | 22   | 19   | 24   | 0.80     | 0.113781 | 12   | 19   | 16   | 12   | 12   | 17   | 15   | 19   | 16   | 15   | 1.07     | 0.664659 | 14   | 1.17     | 0.381782 |
| 252192_at | A13g50000 | CASEIN KINASE II, ALPHA CHAIN 2 / casein kinase II alpha chain 2                    | 655  | 811  | 968  | 864  | 971      | 792  | 811  | 876  | 0.93     | 0.589703 | 795  | 947  | 835  | 1273 | 927  | 883  | 1042 | 994  | 859  | 1024 | 0.84     | 0.138398 | 1028 | 0.84     | 0.268189 |
| 252193_at | A13g50030 | R2R3-MYB transcription factor - suspic myb family transcription factor              | 668  | 742  | 967  | 0.77 | 0.658087 | 725  | 607  | 601  | 931      | 655      | 807  | 633  | 816  | 745  | 604  | 705  | 833  | 816  | 745  | 604  | 0.77     | 0.652324 | 764  | 0.97     | 0.820245 |
| 252194_at | A13g50110 | putative tyrosine phosphatase phospho phosphatase-related                           | 82   | 100  | 84   | 103  | 116      | 84   | 89   | 101  | 0.87     | 0.307557 | 80   | 63   | 75   | 79   | 80   | 70   | 85   | 74   | 72   | 78   | 0.93     | 0.364922 | 76   | 0.95     | 0.558556 |
| 252195_at | A13g50190 | putative protein various predicted crot expressed protein                           | 19   | 23   | 32   | 27   | 28       | 22   | 25   | 26   | 0.97     | 0.856386 | 19   | 14   | 17   | 17   | 17   | 16   | 18   | 14   | 19   | 17   | 0.99     | 0.910257 | 17   | 0.98     | 0.809560 |
| 252196_at | A13g50200 | putative protein predicted crot protein. Arat expressed protein                     | 19   | 45   | 57   | 48   | 46       | 44   | 47   | 0.94 | 0.714595 | 52       | 53   | 48   | 43   | 34   | 49   | 38   | 42   | 51   | 41   | 1.22 | 0.037809 | 42       | 1.20 | 0.139115 |          |
| 252197_at | A13g50230 | receptor protein kinase - like protein rec leucine-rich repeat transmembrane prot   | 52   | 58   | 64   | 74   | 86       | 73   | 68   | 78   | 0.88     | 0.308829 | 68   | 59   | 78   | 81   | 70   | 63   | 94   | 76   | 71   | 68   | 0.84     | 0.502761 | 72   | 0.84     | 0.705057 |
| 252198_at | A13g50250 | putative protein predicted protein. Arat hypothetical protein // hypothetical prot  | 192  | 196  | 318  | 237  | 292      | 276  | 269  | 0.84 | 0.432903 | 185      | 187  | 224  | 225  | 204  | 208  | 194  | 305  | 272  | 199  | 239  | 0.83     | 0.237101 | 206  | 0.97     | 0.701696 |
| 252199_at | A13g50270 | anthranilate N-hydroxycinnamoyl/benz transference family protein                    | 59   | 86   | 82   | 85   | 101      | 79   | 76   | 88   | 0.86     | 0.314491 | 41   | 55   | 51   | 53   | 49   | 51   | 51   | 47   | 55   | 48   | 0.86     | 0.243500 | 51   | 0.92     | 0.390505 |
| 252200_at | A13g50280 | anthranilate N-hydroxycinnamoyl/benz transference family protein                    | 25   | 51   | 27   | 101  | 72       | 58   | 34   | 77   | 0.45     | 0.046532 | 29   | 32   | 36   | 147  | 88   | 87   | 98   | 99   | 32   | 104  | 0.31     | 0.002843 | 108  | 0.30     | 0.018937 |
| 252201_at | A13g50290 | putative protein anthranilate N-hydrox pseudosene, hydroxycinnamoyl benzoyl         | 20   | 17   | 17   | 15   | 20       | 20   | 18   | 19   | 0.97     | 0.822445 | 14   | 23   | 18   | 19   | 16   | 19   | 18   | 19   | 17   | 17   | 1.08     | 0.594557 | 16   | 1.14     | 0.488377 |
| 252202_at | A13g50300 | anthranilate N-hydroxycinnamoyl/benz transference family protein                    | 22   | 34   | 37   | 28   | 34       | 22   | 34   | 31   | 0.83     | 0.691522 | 24   | 24   | 25   | 30   | 24   | 27   | 25   | 30   | 27   | 25   | 0.85     | 0.271458 | 27   | 0.93     | 0.368650 |
| 252203_at | A13g50320 | hypothetical protein                                                                | 23   | 14   | 18   | 23   | 22       | 22   | 18   | 22   | 0.82     | 0.188221 | 17   | 13   | 16   | 17   | 12   | 12   | 12   | 18   | 14   | 15   | 1.08     | 0.578413 | 13   | 1.16     | 0.360502 |
| 252204_at | A13g50340 | putative protein various predicted crot expressed protein                           | 275  | 292  | 281  | 449  | 529      | 405  | 283  |      |          |          |      |      |      |      |      |      |      |      |      |      |          |          |      |          |          |

|           |           |                                                                                         |     |     |     |     |      |     |     |      |          |          |          |     |     |      |      |      |     |      |     |      |          |          |      |          |          |
|-----------|-----------|-----------------------------------------------------------------------------------------|-----|-----|-----|-----|------|-----|-----|------|----------|----------|----------|-----|-----|------|------|------|-----|------|-----|------|----------|----------|------|----------|----------|
| 252128_at | A13g50870 | transcription factor-like protein Arabid; zinc finger (GATA type) family protein        | 331 | 431 | 453 | 481 | 589  | 360 | 405 | 477  | 0.85     | 0.400564 | 436      | 455 | 427 | 703  | 537  | 543  | 504 | 471  | 439 | 552  | 0.80     | 0.081403 | 594  | 0.74     | 0.047779 |
| 252129_at | A13g50890 | putative protein hypothetical protein Tc zinc finger (GATA type) family protein / ZF    | 75  | 110 | 110 | 128 | 138  | 118 | 98  | 128  | 0.77     | 0.082404 | 106      | 120 | 110 | 176  | 137  | 117  | 135 | 115  | 112 | 136  | 0.82     | 0.162079 | 143  | 0.78     | 0.154243 |
| 252130_at | A13g50820 | putative protein 1 photosystem II oxo-oxo-oxo-oxo enhancer protein, chlor               | 20  | 186 | 162 | 139 | 108  | 94  | 149 | 114  | 1.31     | 0.350352 | 163      | 244 | 176 | 275  | 158  | 193  | 257 | 240  | 194 | 225  | 0.87     | 0.407056 | 290  | 0.93     | 0.751845 |
| 252131_at | A13g50920 | BOS1-like protein Hs; zinc finger AAA-like domain protein                               | 42  | 51  | 51  | 66  | 69   | 42  | 70  | 5.69 | 0.017746 | 28       | 32       | 29  | 32  | 29   | 29   | 32   | 29  | 29   | 29  | 29   | 0.87     | 0.564412 | 29   | 0.87     | 0.564412 |
| 252132_at | A13g50790 | putative LEA protein Psa; alcaia late embryo-environment abundant protein, di           | 212 | 283 | 212 | 292 | 338  | 239 | 269 | 290  | 0.93     | 0.644486 | 276      | 265 | 273 | 427  | 332  | 303  | 324 | 301  | 272 | 337  | 0.81     | 0.078939 | 354  | 0.77     | 0.094578 |
| 252133_at | A13g50900 | hypothetical protein hypothetical protei expressed protein                              | 35  | 37  | 45  | 52  | 47   | 45  | 39  | 48   | 0.82     | 0.083956 | 42       | 55  | 51  | 52   | 55   | 42   | 56  | 52   | 49  | 47   | 1.04     | 0.776609 | 43   | 1.14     | 0.387572 |
| 252134_at | A13g50910 | putative protein : supported by cDNA : expressed protein                                | 205 | 232 | 263 | 261 | 280  | 217 | 233 | 253  | 0.92     | 0.485278 | 270      | 216 | 249 | 338  | 275  | 240  | 286 | 270  | 245 | 282  | 0.87     | 0.177952 | 284  | 0.86     | 0.293838 |
| 252135_at | A13g50830 | putative cold acclimation protein 1; stress-responsive protein, putative                | 159 | 241 | 233 | 245 | 196  | 213 | 225 | 0.94 | 0.655262 | 226      | 198      | 216 | 246 | 230  | 221  | 236  | 219 | 232  | 202 | 216  | 0.87     | 0.423084 | 232  | 0.87     | 0.423084 |
| 252136_at | A13g50770 | calmodulin-like protein flaeolac calmoic; calmodulin-like protein flaeolac calmoic      | 15  | 18  | 28  | 29  | 20   | 22  | 20  | 24   | 0.86     | 0.559535 | 97       | 140 | 75  | 77   | 83   | 69   | 78  | 62   | 107 | 74   | 1.45     | 0.097199 | 77   | 1.40     | 0.246848 |
| 252137_at | A13g50980 | dehydrin-like protein dehydrin Xero2 - dehydrin, putative                               | 29  | 33  | 51  | 259 | 43   | 37  | 38  | 113  | 0.33     | 0.362725 | 34       | 35  | 31  | 32   | 28   | 31   | 28  | 31   | 33  | 30   | 1.11     | 0.060330 | 30   | 1.10     | 0.150791 |
| 252138_at | A13g50990 | peroxidase-like protein peroxidase ATI peroxidase, putative                             | 43  | 46  | 51  | 46  | 48   | 51  | 47  | 48   | 0.97     | 0.603030 | 52       | 57  | 51  | 60   | 66   | 51   | 69  | 52   | 53  | 60   | 0.89     | 0.236779 | 59   | 0.90     | 0.266434 |
| 252139_at | A13g51050 | putative protein hypothetical protein L1 FG-DAP repeat-containing protein               | 399 | 493 | 462 | 515 | 570  | 444 | 455 | 510  | 0.89     | 0.003569 | 415      | 406 | 465 | 614  | 472  | 417  | 472 | 463  | 429 | 458  | 0.88     | 0.250035 | 501  | 0.86     | 0.304124 |
| 252140_at | A13g51070 | putative protein several hypothetical on dehydration-responsive protein-related         | 19  | 17  | 23  | 22  | 21   | 18  | 20  | 20   | 0.97     | 0.828716 | 19       | 22  | 20  | 17   | 14   | 16   | 22  | 15   | 20  | 17   | 1.21     | 0.125688 | 16   | 1.30     | 0.028721 |
| 252141_at | A13g51100 | putative protein expressed protein                                                      | 419 | 540 | 617 | 570 | 602  | 488 | 525 | 554  | 0.95     | 0.649591 | 537      | 585 | 559 | 780  | 578  | 568  | 574 | 519  | 560 | 604  | 0.93     | 0.502624 | 642  | 0.87     | 0.308683 |
| 252142_at | A13g51120 | putative protein hypothetical protein F1 zinc finger (CCHC-type) family protein         | 203 | 250 | 243 | 292 | 320  | 220 | 232 | 277  | 0.84     | 0.243507 | 240      | 174 | 214 | 294  | 268  | 235  | 294 | 292  | 209 | 277  | 0.76     | 0.017559 | 266  | 0.79     | 0.092590 |
| 252143_at | A13g51150 | putative protein centromere protein E - kinesin motor family protein                    | 114 | 164 | 116 | 221 | 215  | 142 | 131 | 193  | 0.68     | 0.106395 | 119      | 98  | 112 | 230  | 175  | 162  | 128 | 126  | 110 | 164  | 0.87     | 0.079134 | 169  | 0.58     | 0.021567 |
| 252144_at | A13g51190 | putative protein L8 homolot ribosom SOS ribosomal protein L8 (PILBB)                    | 75  | 86  | 76  | 84  | 72   | 74  | 341 | 306  | 357      | 0.86     | 0.043687 | 280 | 297 | 355  | 441  | 344  | 296 | 297  | 275 | 311  | 0.95     | 0.698958 | 360  | 0.86     | 0.346432 |
| 252145_at | A13g51200 | putative protein several putative protein auxin-responsive family protein               | 19  | 20  | 25  | 23  | 25   | 16  | 21  | 21   | 1.00     | 0.986420 | 15       | 13  | 18  | 23   | 18   | 24   | 20  | 16   | 15  | 20   | 0.76     | 0.074003 | 22   | 0.71     | 0.051857 |
| 252146_at | A13g51210 | putative protein steroid sulfotransferas flavonol 3-sulfotransferase-related            | 18  | 34  | 35  | 26  | 34   | 24  | 29  | 28   | 1.02     | 0.932541 | 24       | 21  | 29  | 24   | 23   | 25   | 25  | 25   | 25  | 25   | 0.99     | 0.910846 | 24   | 1.03     | 0.779318 |
| 252147_at | A13g51270 | putative protein several hypothetical on R101 family protein                            | 180 | 213 | 219 | 210 | 223  | 188 | 204 | 207  | 0.99     | 0.586842 | 153      | 139 | 167 | 191  | 169  | 139  | 167 | 174  | 153 | 168  | 0.91     | 0.271990 | 166  | 0.92     | 0.471488 |
| 252148_at | A13g51280 | M55-like protein male sterility M55, putative                                           | 299 | 336 | 293 | 356 | 373  | 341 | 306 | 357  | 0.86     | 0.043687 | 280      | 297 | 355 | 441  | 344  | 296  | 297 | 275  | 311 | 329  | 0.95     | 0.698958 | 360  | 0.86     | 0.346432 |
| 252149_at | A13g51290 | putative protein hypothetical protein T1 protine-rich family protein                    | 511 | 566 | 568 | 756 | 820  | 569 | 548 | 715  | 0.77     | 0.098034 | 735      | 600 | 797 | 947  | 816  | 782  | 946 | 1006 | 711 | 899  | 0.70     | 0.037737 | 848  | 0.84     | 0.147630 |
| 252150_at | A13g51310 | vacuolar sortin protein 35 homolog vs vacuolar protein sortino-associated prot          | 553 | 756 | 705 | 848 | 995  | 706 | 672 | 850  | 0.79     | 0.159706 | 521      | 431 | 518 | 746  | 673  | 552  | 571 | 563  | 490 | 621  | 0.79     | 0.054708 | 657  | 0.75     | 0.058935 |
| 252151_at | A13g51320 | putative protein several hypothetical on pentatricloetide (PPR) repeat-containi         | 85  | 93  | 113 | 119 | 140  | 118 | 97  | 126  | 0.77     | 0.056314 | 85       | 80  | 93  | 108  | 96   | 91   | 99  | 96   | 86  | 98   | 0.88     | 0.041754 | 98   | 0.87     | 0.117103 |
| 252152_at | A13g51350 | putative protein several hypothetical on aspartyl protease family protein               | 13  | 17  | 21  | 18  | 20   | 19  | 17  | 19   | 0.91     | 0.504222 | 13       | 18  | 15  | 17   | 17   | 15   | 17  | 17   | 15  | 17   | 0.92     | 0.310803 | 16   | 0.93     | 0.504261 |
| 252153_at | A13g51360 | putative protein several hypothetical on aspartyl protease family protein               | 21  | 20  | 22  | 20  | 20   | 22  | 21  | 21   | 1.03     | 0.495395 | 15       | 17  | 16  | 16   | 14   | 19   | 19  | 17   | 16  | 17   | 0.95     | 0.620369 | 16   | 1.00     | 0.973558 |
| 252119_at | A13g51030 | thioredoxin H - supported by full-length: thioredoxin H-type 1 (TRX-H-1)                | 427 | 173 | 156 | 185 | 193  | 176 | 159 | 185  | 0.86     | 0.043500 | 134      | 138 | 148 | 206  | 163  | 138  | 117 | 116  | 140 | 148  | 0.95     | 0.734501 | 169  | 0.83     | 0.228555 |
| 252120_at | A13g51130 | putative protein lin-10 protein - Rattus: expressed protein                             | 140 | 547 | 634 | 478 | 559  | 421 | 534 | 486  | 1.10     | 0.557816 | 423      | 482 | 512 | 680  | 514  | 513  | 497 | 471  | 472 | 535  | 0.88     | 0.281705 | 569  | 0.83     | 0.189863 |
| 252121_at | A13g51160 | GDP-D-mannose-4,6-dehydratase (M1, GDP-D-mannose-4,6-dehydratase (IMUF                  | 448 | 469 | 506 | 667 | 658  | 530 | 474 | 625  | 0.76     | 0.042236 | 325      | 301 | 381 | 509  | 351  | 335  | 321 | 343  | 336 | 372  | 0.90     | 0.493471 | 338  | 0.84     | 0.381782 |
| 252122_at | A13g51140 | putative protein hypothetical protein 232                                               | 283 | 287 | 293 | 308 | 304  | 274 | 293 | 283  | 0.77     | 0.444235 | 274      | 279 | 290 | 302  | 293  | 271  | 304 | 292  | 274 | 307  | 0.91     | 0.393273 | 302  | 0.89     | 0.445669 |
| 252123_at | A13g51240 | flavonone 3-hydroxylase (FH3) -suppo narinquin 3-dioxygenase / flavanone 3-             | 83  | 162 | 126 | 299 | 191  | 251 | 124 | 247  | 0.50     | 0.033239 | 176      | 160 | 232 | 550  | 317  | 209  | 233 | 225  | 189 | 307  | 0.62     | 0.224276 | 359  | 0.53     | 0.174519 |
| 252124_at | A13g51010 | putative protein - supported by full- expressed protein                                 | 643 | 823 | 877 | 912 | 1009 | 815 | 781 | 912  | 0.86     | 0.218677 | 794      | 893 | 910 | 1242 | 949  | 917  | 849 | 829  | 866 | 957  | 0.90     | 0.409323 | 1028 | 0.84     | 0.196241 |
| 252125_at | A13g51040 | putative protein hypothetical protein F1 expressed protein                              | 261 | 379 | 374 | 379 | 454  | 339 | 338 | 391  | 0.87     | 0.361911 | 337      | 353 | 348 | 486  | 425  | 373  | 429 | 381  | 346 | 19   | 0.83     | 0.036712 | 436  | 0.81     | 0.087435 |
| 252094_at | A13g51260 | multicatalytic endopeptidase complex - 20S roteasome alpha subunit D (PAD1              | 618 | 705 | 691 | 939 | 1154 | 855 | 691 | 983  | 0.70     | 0.041997 | 865      | 989 | 885 | 1400 | 1152 | 1031 | 952 | 885  | 910 | 1084 | 0.94     | 0.210223 | 1194 | 0.76     | 0.098709 |
| 252095_at | A13g51000 | ecoidase hydrolase-like protein ecoidase epoxide hydrolase, putative                    | 504 | 724 | 883 | 685 | 742  | 601 | 704 | 676  | 1.04     | 0.823247 | 494      | 626 | 589 | 924  | 618  | 592  | 703 | 694  | 570 | 706  | 0.81     | 0.150590 | 712  | 0.80     | 0.279010 |
| 252096_at | A13g51180 | putative protein - supported by cDI zinc finger (CCHC-type) family protein              | 43  | 46  | 55  | 67  | 50   | 48  | 57  | 0.84 | 0.227092 | 33       | 34       | 47  | 56  | 43   | 32   | 55   | 47  | 38   | 47  | 0.81 | 0.240163 | 44       | 0.87 | 0.524847 |          |
| 252097_at | A13g51090 | putative protein hypothetical protein F1 expressed protein                              | 59  | 73  | 65  | 89  | 79   | 74  | 66  | 81   | 0.81     | 0.068629 | 67       | 67  | 75  | 111  | 80   | 82   | 83  | 75   | 70  | 76   | 0.86     | 0.110884 | 91   | 0.77     | 0.111390 |
| 252098_at | A13g51130 | putative protein several hypothetical on aspartyl protease family protein               | 16  | 15  | 16  | 15  | 16   | 15  | 15  | 16   | 0.97     | 0.396865 | 17       | 19  | 19  | 16   | 14   | 16   | 12  | 13   | 16  | 14   | 1.32     | 0.13     | 16   | 1.22     | 0.091001 |
| 252099_at | A13g51250 | putative protein senescence-associated senescence/dehydration-associated pro            | 191 | 237 | 255 | 334 | 354  | 271 | 227 | 320  | 0.71     | 0.041926 | 199      | 189 | 220 | 345  | 266  | 236  | 234 | 231  | 203 | 262  | 0.77     | 0.088359 | 282  | 0.72     | 0.077076 |
| 252100_at | A13g51110 | crooked neck-like protein crooked neck crooked neck protein, putative / cell cvc        | 36  | 50  | 45  | 50  | 44   | 35  | 44  | 43   | 1.01     | 0.948310 | 25       | 27  | 26  | 40   | 31   | 34   | 37  | 28   | 26  | 34   | 0.76     | 0.027818 | 35   | 0.74     | 0.029401 |
| 252101_at | A13g51300 | rac-like GTP binding protein Arac11 : Rac-like GTP-binding protein (ARAC11)             | 71  | 86  | 90  | 111 | 121  | 98  | 82  | 110  | 0.75     | 0.032802 | 60       | 66  | 78  | 123  | 83   | 86   | 82  | 75   | 68  | 90   | 0.76     | 0.117222 | 97   | 0.70     | 0.103379 |
| 252102_at | A13g50970 | dehydrin Xero2 - supported by cDNA : dehydrin xero2 (XERO2) / low-tempera               | 12  | 10  | 17  | 113 | 12   | 14  | 16  | 45   | 0.35     | 0.418312 | 14       | 14  | 16  | 15   | 10   | 11   | 20  | 13   | 10  | 13   | 1.18     | 0.375244 | 14   | 1.11     | 0.660091 |
| 252103_at | A13g51410 | putative protein various predicted prot; putative protein various predicted prot        | 52  | 56  | 72  | 65  | 72   | 55  | 69  | 54   | 0.75     | 0.001344 | 51       | 48  | 49  | 40   | 45   | 51   | 55  | 57   | 57  | 58   | 0.87     | 0.178847 | 54   | 0.89     | 0.365751 |
| 252104_at | A13g51040 | putative protein KAA0851 protein, Hs dephosphinase xeno2 expressed protein              | 275 | 354 | 348 | 459 | 478  | 391 | 326 | 443  | 0.74     | 0.033061 | 258      | 202 | 233 | 315  | 247  | 236  | 265 | 273  | 231 | 267  | 0.86     | 0.145863 | 266  | 0.87     | 0.302628 |
| 252105_at | A13g51470 | putative protein phosphatase 2C-like protein pr protein phosphatase 2C, putative / PP2X | 58  | 73  | 68  | 77  | 94   | 81  | 66  | 84   | 0.79     | 0.056521 | 58       | 52  | 66  | 81   | 66   | 63   | 64  | 55   | 58  | 66   | 0.89     | 0.287327 | 70   | 0.83     | 0.173019 |
| 252106_at | A13g51480 | putative glutamate receptor putative di glutamate receptor family protein (GLR3         | 179 | 215 | 279 | 254 | 272  | 246 | 224 | 257  | 0.87     | 0.332285 | 116      | 104 | 143 | 133  | 108  | 110  | 143 | 135  | 121 | 126  | 0.96     | 0.275027 | 117  | 1.04     | 0.783749 |
| 252107_at | A13g51490 | sugar transporter-like protein sugar tra sugar transporter family protein               | 74  | 86  | 90  | 98  | 98   | 84  | 99  | 85   | 0.85     | 0.116339 | 82       | 74  | 77  | 86   | 94   | 70   | 82  | 90   | 81  | 792  | 0.84     | 0.311792 | 82   | 0.84     | 0.822120 |
| 252108_at | A13g51530 | putative protein various predicted prot-F-box family protein                            | 183 |     |     |     |      |     |     |      |          |          |          |     |     |      |      |      |     |      |     |      |          |          |      |          |          |

|          |          |                                                                                    |      |      |      |      |      |      |      |      |      |          |          |      |      |       |      |      |      |      |      |      |          |          |      |          |          |
|----------|----------|------------------------------------------------------------------------------------|------|------|------|------|------|------|------|------|------|----------|----------|------|------|-------|------|------|------|------|------|------|----------|----------|------|----------|----------|
| 252040   | A3G52090 | putative protein hypothetical protein F1 expressed protein                         | 319  | 533  | 634  | 514  | 531  | 433  | 495  | 493  | 1.01 | 0.979471 | 338      | 368  | 359  | 498   | 378  | 398  | 377  | 366  | 355  | 0.88 | 0.188735 | 425      | 0.84 | 0.139083 |          |
| 252041   | A3G52090 | DNA-directed RNA polymerase II 13.6 DNA-directed RNA polymerase II 13.6 k          | 910  | 1136 | 1186 | 1171 | 1280 | 1144 | 1074 | 1198 | 0.90 | 0.271738 | 1172     | 1368 | 1291 | 1691  | 1325 | 1232 | 1257 | 1177 | 1277 | 1335 | 0.96     | 0.670177 | 1416 | 0.90     | 0.410036 |
| 252042   | A3G5190  | putative serine/threonine protein kinase                                           | 155  | 184  | 209  | 215  | 261  | 190  | 183  | 222  | 0.82 | 0.203568 | 178      | 167  | 177  | 264   | 211  | 186  | 232  | 203  | 174  | 203  | 0.79     | 0.347681 | 120  | 0.79     | 0.118864 |
| 252043   | A3G52390 | putative mitD protein kinase. Escherichia coli-related deoxynucleoside family o    | 70   | 87   | 81   | 100  | 116  | 98   | 79   | 104  | 0.76 | 0.029751 | 80       | 85   | 96   | 145   | 100  | 91   | 89   | 89   | 87   | 103  | 0.85     | 0.024618 | 112  | 0.78     | 0.120557 |
| 252044   | A3G52400 | putative envelope membrane protein. Envelope membrane protein, outst               | 245  | 265  | 261  | 311  | 315  | 322  | 311  | 322  | 0.95 | 0.146652 | 260      | 259  | 260  | 312   | 292  | 312  | 292  | 312  | 302  | 312  | 0.92     | 0.078859 | 304  | 0.91     | 0.078859 |
| 252045   | A3G52450 | putative protein arm repeat containing U-box domain-containing protein             | 23   | 32   | 39   | 39   | 44   | 40   | 31   | 41   | 0.76 | 0.113185 | 22       | 22   | 31   | 25    | 21   | 28   | 34   | 26   | 25   | 27   | 0.93     | 0.588705 | 25   | 1.00     | 0.995971 |
| 252046   | A3G52460 | putative protein extensin-Nicotiana tab hydroxypoline-rich glycoprotein family p   | 42   | 42   | 58   | 42   | 43   | 44   | 47   | 43   | 1.09 | 0.526152 | 24       | 32   | 31   | 30    | 20   | 30   | 34   | 28   | 29   | 29   | 1.01     | 0.928435 | 27   | 1.08     | 0.617025 |
| 252047   | A3G52490 | putative protein heat shock protein - G heat shock protein-related                 | 231  | 275  | 276  | 307  | 379  | 262  | 261  | 316  | 0.83 | 0.211962 | 314      | 108  | 143  | 208   | 162  | 143  | 202  | 191  | 128  | 181  | 0.71     | 0.027147 | 171  | 0.75     | 0.123484 |
| 252048   | A3G52500 | expressed protein supported by CDNA. Yeast protease family protein                 | 152  | 183  | 171  | 163  | 176  | 163  | 171  | 163  | 0.86 | 0.076201 | 225      | 105  | 226  | 192   | 142  | 164  | 177  | 124  | 187  | 214  | 1.27     | 0.062092 | 166  | 1.29     | 0.655021 |
| 252049   | A3G52510 | putative protein outside and hypothetical F-box family protein-related             | 23   | 25   | 20   | 20   | 20   | 17   | 17   | 17   | 0.88 | 0.021947 | 48       | 52   | 52   | 68    | 52   | 46   | 53   | 59   | 52   | 61   | 0.92     | 0.885032 | 50   | 1.01     | 0.885032 |
| 252050   | A3G52550 | hypothetical protein                                                               | 20   | 24   | 26   | 25   | 26   | 29   | 24   | 26   | 0.89 | 0.245304 | 21       | 23   | 24   | 21    | 18   | 19   | 22   | 18   | 23   | 20   | 1.15     | 0.060234 | 19   | 1.17     | 0.069265 |
| 252051   | A3G52570 | putative protein similarly hypothetical - expressed protein                        | 100  | 144  | 152  | 147  | 168  | 132  | 132  | 149  | 0.89 | 0.428807 | 163      | 146  | 137  | 226   | 169  | 163  | 179  | 158  | 149  | 179  | 0.83     | 0.126733 | 186  | 0.80     | 0.156015 |
| 252052   | A3G52600 | beta-fructofuranosidase                                                            | 43   | 57   | 51   | 54   | 54   | 50   | 51   | 55   | 0.92 | 0.439627 | 55       | 33   | 44   | 31    | 38   | 32   | 39   | 37   | 35   | 1.07 | 0.045247 | 33       | 1.14 | 0.287821 |          |
| 252053   | A3G52610 | putative RNA11 synthase, putative (SPY122)                                         | 138  | 151  | 177  | 121  | 120  | 111  | 109  | 138  | 0.90 | 0.745300 | 110      | 113  | 108  | 194   | 62   | 63   | 143  | 102  | 109  | 165  | 1.01     | 0.001659 | 161  | 1.01     | 0.001659 |
| 252054   | A3G52640 | hypothetical protein - supported by full-ovate family protein                      | 36   | 45   | 57   | 45   | 42   | 41   | 44   | 43   | 1.04 | 0.756519 | 48       | 48   | 43   | 50    | 44   | 49   | 53   | 53   | 50   | 50   | 1.07     | 0.453007 | 48   | 1.11     | 0.355611 |
| 252055   | A3G52580 | putative ribosomal protein S14 ribosom 40S ribosomal protein S14 (RP514LC)         | 1939 | 2301 | 2354 | 2448 | 2640 | 2283 | 2198 | 2457 | 0.89 | 0.191445 | 2301     | 2218 | 2408 | 3084  | 2488 | 2351 | 2282 | 2352 | 2219 | 2515 | 0.88     | 0.216029 | 2641 | 0.84     | 0.166661 |
| 252056   | A3G52590 | ubiquitin extension protein (UBQ1) like ubiquitin extension protein 1 (UBQ1) (E    | 3633 | 4200 | 4344 | 4496 | 4688 | 4307 | 4003 | 4487 | 0.89 | 0.098855 | 3757     | 4082 | 4192 | 4743  | 4212 | 3776 | 4320 | 4272 | 4010 | 4255 | 0.94     | 0.303533 | 4244 | 0.94     | 0.491038 |
| 252057   | A3G52620 | putative protein - supported by full-length ubiquitin-like protein                 | 37   | 57   | 66   | 17   | 17   | 14   | 17   | 14   | 1.35 | 0.196848 | 49       | 62   | 61   | 53    | 49   | 42   | 50   | 50   | 49   | 50   | 1.02     | 0.502803 | 54   | 1.21     | 0.705126 |
| 252058   | A3G52470 | putative protein hml1 protein-Nicotiana hml1-induced family protein / Hml1 fac     | 863  | 1202 | 190  | 260  | 309  | 213  | 185  | 260  | 0.71 | 0.066109 | 948      | 1117 | 234  | 317   | 275  | 269  | 212  | 197  | 215  | 254  | 0.85     | 0.245826 | 1271 | 0.75     | 0.019496 |
| 252059   | A3G52560 | E2, ubiquitin-conjugating enzyme, put ubiquitin-inducated enzyme family pro        | 806  | 1100 | 1136 | 1244 | 1330 | 1020 | 1014 | 1198 | 0.85 | 0.257086 | 194      | 2119 | 1016 | 1395  | 1178 | 1060 | 1163 | 1120 | 1027 | 1183 | 0.87     | 0.112975 | 281  | 0.85     | 0.170603 |
| 252060   | A3G52430 | putative protein other hypothetical protein phytoalexin-deficient 4 protein (PAD4) | 11   | 16   | 17   | 18   | 25   | 19   | 14   | 21   | 0.69 | 0.100840 | 10       | 10   | 12   | 15    | 11   | 11   | 12   | 11   | 11   | 11   | 0.82     | 0.217948 | 12   | 0.84     | 0.226905 |
| 252061   | A3G52630 | hypothetical protein choshataze activira hypothetical protein                      | 48   | 53   | 56   | 17   | 16   | 17   | 14   | 17   | 1.14 | 0.101614 | 44       | 44   | 44   | 44    | 44   | 44   | 44   | 44   | 44   | 44   | 1.02     | 0.001044 | 44   | 1.02     | 0.001044 |
| 252062   | A3G52640 | hypothetical protein KIAA0253 protein, nicastrin-related                           | 448  | 530  | 575  | 625  | 703  | 489  | 518  | 606  | 0.85 | 0.294042 | 395      | 375  | 426  | 479   | 449  | 397  | 413  | 441  | 399  | 436  | 0.82     | 0.141492 | 441  | 0.80     | 0.201534 |
| 252063   | A3G52650 | hypothetical protein                                                               | 68   | 80   | 81   | 131  | 154  | 105  | 76   | 130  | 0.59 | 0.022250 | 29       | 25   | 37   | 43    | 37   | 39   | 46   | 38   | 30   | 41   | 0.75     | 0.022918 | 40   | 0.77     | 0.075600 |
| 252028_s | A3G52660 | putative RNA binding protein heterore RNA recognition motif (RRM1)-containi        | 189  | 266  | 273  | 260  | 306  | 233  | 246  | 266  | 0.91 | 0.531116 | 233      | 217  | 222  | 299   | 252  | 222  | 286  | 292  | 224  | 270  | 0.83     | 0.058733 | 258  | 0.87     | 0.121275 |
| 252030   | A3G52690 | hypothetical protein predicted protein                                             | 28   | 31   | 48   | 42   | 49   | 35   | 36   | 42   | 0.86 | 0.074240 | 21       | 19   | 26   | 22    | 22   | 22   | 22   | 22   | 22   | 22   | 1.00     | 0.889120 | 22   | 1.00     | 0.889120 |
| 252031   | A3G52700 | hypothetical protein predicted protein                                             | 18   | 21   | 18   | 20   | 18   | 18   | 18   | 18   | 0.75 | 0.077611 | 16       | 16   | 17   | 17    | 17   | 17   | 17   | 17   | 17   | 17   | 0.84     | 0.042841 | 17   | 0.84     | 0.042841 |
| 252000   | A3G52710 | hypothetical protein predicted protein - expressed protein                         | 56   | 71   | 76   | 85   | 82   | 86   | 85   | 80   | 0.78 | 0.018181 | 57       | 54   | 65   | 66    | 58   | 58   | 63   | 59   | 63   | 63   | 0.93     | 0.275285 | 61   | 0.97     | 0.060339 |
| 252001   | A3G52750 | olastid division protein FtsZ-like FtsZ c chloroplast division protein, putative   | 179  | 245  | 245  | 315  | 351  | 264  | 223  | 341  | 0.72 | 0.061181 | 208      | 196  | 218  | 332   | 268  | 231  | 245  | 246  | 207  | 264  | 0.78     | 0.057765 | 277  | 0.75     | 0.081260 |
| 252002   | A3G52760 | hypothetical protein YP1 protein. Sac char integral membrane Yp1 family protein    | 235  | 282  | 277  | 300  | 383  | 285  | 263  | 340  | 0.78 | 0.076482 | 259      | 258  | 298  | 400   | 328  | 304  | 307  | 344  | 272  | 337  | 0.81     | 0.040985 | 344  | 0.79     | 0.083838 |
| 252003   | A3G52770 | hypothetical protein emm32, Streptococcus expressed protein                        | 20   | 22   | 22   | 22   | 22   | 22   | 22   | 22   | 0.78 | 0.001448 | 21       | 21   | 21   | 21    | 21   | 21   | 21   | 21   | 21   | 21   | 0.81     | 0.016477 | 21   | 0.81     | 0.016477 |
| 252004   | A3G52810 | purple acid phosphatase-like protein p purple acid phosphatase (PAP20)             | 21   | 26   | 37   | 32   | 47   | 35   | 28   | 38   | 0.73 | 0.197571 | 52       | 61   | 50   | 28    | 48   | 37   | 62   | 56   | 54   | 46   | 1.17     | 0.387147 | 38   | 1.44     | 0.088729 |
| 252005   | A3G52870 | purple acid phosphatase-like protein p purple acid phosphatase (PAP21)             | 21   | 20   | 25   | 23   | 26   | 20   | 22   | 23   | 0.94 | 0.551095 | 15       | 15   | 19   | 25    | 14   | 15   | 22   | 16   | 16   | 18   | 0.89     | 0.510214 | 18   | 0.91     | 0.689388 |
| 252006   | A3G52820 | purple acid choshataze-like protein p purple acid phosphatase (PAP22)              | 35   | 39   | 49   | 49   | 52   | 53   | 41   | 51   | 0.81 | 0.107346 | 30       | 36   | 41   | 41    | 31   | 32   | 35   | 34   | 36   | 36   | 1.00     | 0.993919 | 36   | 0.99     | 0.992528 |
| 252007   | A3G52830 | hypothetical protein MobA                                                          | 13   | 13   | 13   | 13   | 13   | 13   | 13   | 13   | 0.78 | 0.054649 | 36       | 35   | 41   | 41    | 41   | 41   | 41   | 41   | 41   | 41   | 0.96     | 0.981356 | 41   | 0.96     | 0.981356 |
| 252008   | A3G52810 | hypothetical protein - supported by cDN expressed protein                          | 315  | 401  | 361  | 501  | 527  | 431  | 359  | 486  | 0.74 | 0.027980 | 364      | 351  | 378  | 655   | 462  | 484  | 536  | 472  | 364  | 514  | 0.71     | 0.020558 | 520  | 0.70     | 0.077886 |
| 252009   | A3G52800 | zinc finger - like protein zinc finger protein AN1-like family protein             | 712  | 841  | 1007 | 1138 | 1304 | 833  | 853  | 1092 | 0.78 | 0.115530 | 513      | 658  | 498  | 866   | 592  | 578  | 730  | 671  | 556  | 688  | 0.81     | 0.148702 | 679  | 0.82     | 0.031423 |
| 252010   | A3G52740 | hypothetical protein - supported by cDN expressed protein                          | 72   | 87   | 52   | 89   | 81   | 70   | 40   | 80   | 0.50 | 0.008090 | 45       | 38   | 39   | 104   | 75   | 69   | 89   | 77   | 41   | 83   | 0.49     | 0.002228 | 83   | 0.49     | 0.018012 |
| 252011   | A3G52720 | carbonic anhydrase (CAH1) - carbonic anhydrase family protein                      | 40   | 37   | 38   | 37   | 37   | 53   | 40   | 39   | 0.43 | 0.89     | 40       | 39   | 40   | 39    | 30   | 37   | 37   | 37   | 37   | 37   | 0.91     | 0.735480 | 37   | 0.91     | 0.120384 |
| 252012   | A3G52730 | ubiquitin-cytochrome c-reductase-like protein C reductase UOC                      | 1408 | 1903 | 1777 | 2130 | 2325 | 1878 | 2113 | 2365 | 0.98 | 0.098276 | 1617     | 1594 | 1632 | 22405 | 1842 | 1727 | 1822 | 1607 | 1632 | 1802 | 0.87     | 0.092922 | 1902 | 0.87     | 0.092922 |
| 252013   | A3G52680 | putative protein                                                                   | 239  | 271  | 278  | 304  | 265  | 278  | 316  | 289  | 0.83 | 0.492527 | 347      | 371  | 334  | 487   | 377  | 352  | 359  | 326  | 351  | 380  | 0.92     | 0.486665 | 405  | 0.87     | 0.270119 |
| 252014   | A3G52870 | putative protein predicted protein. Arc calmodulin-binding family protein          | 565  | 638  | 684  | 916  | 1015 | 843  | 629  | 925  | 0.68 | 0.008176 | 564      | 504  | 593  | 1346  | 1018 | 866  | 1041 | 979  | 554  | 1050 | 0.53     | 0.003749 | 1072 | 0.51     | 0.022160 |
| 252015   | A3G52910 | putative protein growth-regulating factor predicted protein                        | 165  | 249  | 239  | 263  | 285  | 246  | 217  | 265  | 0.82 | 0.176279 | 194      | 226  | 229  | 334   | 249  | 241  | 215  | 223  | 216  | 252  | 0.86     | 0.063303 | 274  | 0.79     | 0.137639 |
| 252016   | A3G52910 | putative protein predicted protein. Arat CBS domain-containing protein / occlus    | 22   | 22   | 22   | 22   | 22   | 22   | 22   | 22   | 0.78 | 0.001448 | 21       | 21   | 21   | 21    | 21   | 21   | 21   | 21   | 21   | 21   | 0.81     | 0.016477 | 21   | 0.81     | 0.016477 |
| 252017   | A3G52970 | cytochrome P450 - like protein cytochrome P450 family protein                      | 22   | 27   | 29   | 29   | 32   | 27   | 26   | 29   | 0.89 | 0.254566 | 25       | 22   | 27   | 28    | 17   | 23   | 29   | 24   | 23   | 14   | 0.87     | 0.765250 | 23   | 1.08     | 0.186777 |
| 252018   | A3G53000 | putative protein various predicted ortho F-box family protein / SKP1 interacto c   | 103  | 128  | 121  | 126  | 147  | 118  | 118  | 130  | 0.90 | 0.332562 | 126      | 134  | 124  | 159   | 127  | 122  | 133  | 125  | 114  | 128  | 0.94     | 0.779318 | 136  | 0.94     | 0.560349 |
| 252019   | A3G53040 | late embryo-onset abundant protein, late embryo-onset abundant protein, o          | 19   | 21   | 34   | 34   | 37   | 36   | 29   | 24   | 137  | 0.18     | 0.341064 | 15   | 17   | 23    | 26   | 21   | 19   | 21   | 20   | 18   | 0.86     | 0.281710 | 22   | 0.84     | 0.342423 |
| 252020   | A3G53050 | putative protein predicted protein. S E3 ubiquitin ligase SCF component subunit    | 13   | 13   | 13   | 13   | 13   | 13   | 13   | 13   | 0.78 | 0.054649 | 36       | 35   | 41   | 41    | 41   | 41   | 41   | 41   | 41   | 41   | 0.96     | 0.981356 | 41   | 0.96     | 0.981356 |
| 252021   | A3G53010 | putative protein predicted protein. Arat beta-galactosidase-related                | 20   | 20   | 23   | 23   | 20   |      |      |      |      |          |          |      |      |       |      |      |      |      |      |      |          |          |      |          |          |

|             |           |                                                                                     |      |      |      |      |      |      |      |      |          |          |      |      |      |      |      |      |      |      |      |      |          |          |      |          |           |
|-------------|-----------|-------------------------------------------------------------------------------------|------|------|------|------|------|------|------|------|----------|----------|------|------|------|------|------|------|------|------|------|------|----------|----------|------|----------|-----------|
| 251946_at   | A13g53540 | putative protein predicted proteins. Ara expressed protein                          | 137  | 181  | 203  | 224  | 249  | 187  | 173  | 220  | 0.79     | 0.156210 | 122  | 101  | 134  | 179  | 147  | 118  | 135  | 126  | 119  | 141  | 0.84     | 0.214896 | 148  | 0.80     | 0.222217  |
| 251947_at   | A13g53550 | putative protein various predicted prot hyptothetical protein                       | 18   | 21   | 24   | 21   | 22   | 19   | 21   | 21   | 0.01     | 0.882265 | 16   | 19   | 16   | 15   | 22   | 20   | 20   | 20   | 17   | 19   | 0.88     | 0.189421 | 19   | 0.90     | 0.428099  |
| 251948_at   | A13g53580 | diaminomaleate isomerase - like prot diaminoisomaleate isomerase family crote       | 7    | 736  | 83   | 984  | 1054 | 902  | 756  | 980  | 0.77     | 0.020432 | 735  | 816  | 887  | 1132 | 856  | 804  | 860  | 920  | 813  | 915  | 0.89     | 0.265650 | 931  | 0.87     | 0.346844  |
| 251949_at   | A13g53590 | receptor protein-like protein Cl leucine-4-oxalotransferase                         | 27   | 34   | 36   | 34   | 23   | 29   | 36   | 38   | 0.80     | 0.047362 | 19   | 23   | 22   | 22   | 22   | 22   | 22   | 22   | 22   | 22   | 1.00     | 0.987321 | 22   | 1.00     | 0.987321  |
| 251950_at   | A13g53600 | zinc finger - like protein Znf11 zinc firo zinc finger (C2H2 type) family protein   | 66   | 10   | 11   | 13   | 13   | 11   | 9    | 12   | 0.77     | 0.084100 | 6    | 6    | 8    | 12   | 10   | 9    | 13   | 6    | 7    | 10   | 0.72     | 0.172046 | 10   | 0.70     | 0.058177  |
| 251951_x_at | A13g53630 | putative protein predicted proteins. Ara expressed protein // hyptothetical protein | 215  | 317  | 355  | 294  | 327  | 249  | 296  | 290  | 1.02     | 0.909239 | 252  | 286  | 279  | 336  | 239  | 256  | 248  | 247  | 272  | 265  | 1.03     | 0.784336 | 277  | 0.98     | 0.889404  |
| 251952_at   | A13g53650 | histone H2B - like protein histone H2B histone H2B, putative                        | 143  | 189  | 156  | 161  | 153  | 140  | 163  | 151  | 1.08     | 0.488817 | 101  | 93   | 106  | 106  | 89   | 87   | 90   | 88   | 100  | 92   | 1.09     | 0.178438 | 94   | 1.07     | 0.425121  |
| 251953_at   | A13g53660 | putative protein predicted proteins. Ara expressed protein                          | 58   | 94   | 106  | 110  | 110  | 93   | 103  | 0.73 | 0.055919 | 67       | 83   | 72   | 74   | 76   | 78   | 79   | 82   | 81   | 79   | 82   | 0.81     | 0.132411 | 86   | 0.82     | 0.294109  |
| 251954_at   | A13g53670 | putative protein predicted proteins. Ara expressed protein                          | 425  | 561  | 525  | 576  | 604  | 465  | 504  | 548  | 0.92     | 0.489904 | 619  | 578  | 630  | 794  | 673  | 614  | 736  | 762  | 609  | 716  | 0.85     | 0.053939 | 694  | 0.88     | 0.201185  |
| 251955_at   | A13g53680 | outative protein predicted proteins. Ais PHD finger transcription factor, putative  | 181  | 229  | 221  | 263  | 257  | 221  | 210  | 247  | 0.85     | 0.137851 | 133  | 115  | 164  | 167  | 141  | 133  | 124  | 142  | 137  | 141  | 0.97     | 0.789905 | 147  | 0.94     | 0.623265  |
| 251956_at   | A13g53690 | RNA-binding protein cd20 protein - suoz 29 Kda ribonucleoerstein, chlorolast / F    | 862  | 1423 | 1408 | 989  | 1314 | 1002 | 1231 | 1102 | 1.12     | 0.577192 | 950  | 1172 | 836  | 1068 | 844  | 926  | 1409 | 1279 | 986  | 1105 | 0.89     | 0.480262 | 946  | 1.04     | 0.752247  |
| 251957_at   | A13g53690 | putative protein predicted proteins. Ara expressed protein                          | 101  | 131  | 153  | 167  | 197  | 154  | 130  | 173  | 0.75     | 0.112638 | 110  | 128  | 140  | 196  | 155  | 157  | 161  | 155  | 162  | 165  | 0.76     | 0.020756 | 170  | 0.74     | 0.054223  |
| 251958_at   | A13g53690 | putative protein predicted proteins. Ara expressed protein                          | 192  | 255  | 275  | 295  | 380  | 295  | 241  | 348  | 0.69     | 0.212465 | 382  | 280  | 309  | 452  | 343  | 322  | 321  | 328  | 290  | 353  | 0.82     | 0.115841 | 372  | 0.78     | 0.119422  |
| 251959_at   | A13g53410 | putative protein KIAA0544 protein, Hom zinc finger (C3HC4-type RING finger) fa      | 74   | 125  | 134  | 111  | 143  | 101  | 111  | 118  | 0.94     | 0.749789 | 111  | 148  | 117  | 168  | 119  | 123  | 154  | 146  | 125  | 142  | 0.88     | 0.308798 | 137  | 0.92     | 0.586292  |
| 251960_at   | A13g53610 | GTase AIRA8B - supported by full-len Ras-related GTP-binding protein, putativ       | 368  | 470  | 457  | 483  | 587  | 429  | 432  | 500  | 0.86     | 0.297038 | 397  | 415  | 399  | 639  | 554  | 480  | 457  | 451  | 404  | 516  | 0.78     | 0.056941 | 557  | 0.72     | 0.029408  |
| 251961_at   | A13g53620 | inorganic pyrophosphatase - like protein inorganic pyrophosphatase, putative iso    | 236  | 273  | 371  | 256  | 284  | 251  | 293  | 264  | 1.11     | 0.517489 | 180  | 211  | 190  | 279  | 206  | 196  | 206  | 189  | 193  | 216  | 0.90     | 0.362446 | 228  | 0.85     | 0.277593  |
| 251962_at   | A13g53420 | clasma membrane intrinsic protein 2a - plasma membrane intrinsic protein 2A if      | 1621 | 1631 | 1250 | 151  | 1191 | 831  | 1345 | 1145 | 1.17     | 0.532910 | 751  | 1009 | 689  | 1332 | 963  | 989  | 1089 | 1071 | 816  | 1089 | 0.75     | 0.052324 | 1094 | 0.75     | 0.1465917 |
| 251963_at   | A13g53570 | protein kinase (AME2/AF1) : supporti protein kinase (AF1) (AME2)                    | 242  | 305  | 302  | 360  | 394  | 313  | 283  | 356  | 0.80     | 0.079918 | 337  | 288  | 338  | 396  | 372  | 307  | 350  | 339  | 321  | 353  | 0.91     | 0.226206 | 358  | 0.90     | 0.303847  |
| 251964_at   | A13g53370 | hyptothetical protein - supported by cdi DNA-binding S1FA family protein            | 378  | 434  | 440  | 506  | 665  | 531  | 417  | 567  | 0.74     | 0.047925 | 403  | 373  | 426  | 515  | 512  | 493  | 502  | 531  | 401  | 510  | 0.79     | 0.000233 | 506  | 0.79     | 0.003217  |
| 251936_at   | A13g53700 | putative protein csp1 protein. Zea mays pentatricopeptide (PPF) repeat-contains     | 130  | 173  | 156  | 202  | 216  | 181  | 153  | 199  | 0.77     | 0.046402 | 107  | 99   | 129  | 174  | 128  | 130  | 145  | 146  | 112  | 145  | 0.77     | 0.044024 | 144  | 0.78     | 0.142823  |
| 251905_at   | A13g53710 | putative protein zinc finger protein GC1 ARF GAP-like zinc finger-containing pro    | 35   | 60   | 47   | 46   | 46   | 44   | 46   | 0.95 | 0.680660 | 33       | 41   | 38   | 46   | 36   | 38   | 41   | 49   | 37   | 42   | 0.89 | 0.238704 | 40       | 0.94 | 0.530958 |           |
| 251906_at   | A13g53720 | putative protein several hyptothetical N cation/hydrooen exchanger, outative C3     | 20   | 26   | 39   | 30   | 34   | 29   | 28   | 31   | 0.92     | 0.669550 | 18   | 22   | 21   | 21   | 19   | 17   | 21   | 24   | 20   | 20   | 1.00     | 0.965500 | 19   | 1.08     | 0.436440  |
| 251907_at   | A13g53760 | outative protein 850 protein - Medicaeo tubulin family protein                      | 127  | 167  | 179  | 192  | 231  | 167  | 158  | 197  | 0.80     | 0.186007 | 111  | 131  | 146  | 177  | 151  | 126  | 139  | 143  | 129  | 147  | 0.88     | 0.228249 | 151  | 0.85     | 0.281371  |
| 251908_at   | A13g53770 | outative protein late embryosion abur late embryoenesis abundant protein-re         | 15   | 19   | 16   | 18   | 21   | 17   | 17   | 19   | 0.90     | 0.334755 | 19   | 32   | 15   | 18   | 10   | 20   | 20   | 22   | 17   | 17   | 1.34     | 0.256633 | 14   | 1.55     | 0.236865  |
| 251909_at   | A13g53790 | putative protein initiator-binding protein telomere-binding protein, putative       | 43   | 55   | 66   | 66   | 67   | 62   | 55   | 65   | 0.85     | 0.222208 | 50   | 52   | 51   | 50   | 57   | 54   | 57   | 61   | 51   | 56   | 0.91     | 0.086072 | 54   | 0.94     | 0.241279  |
| 251910_at   | A13g53810 | serine/threonine-specific kinase like pr lectin protein kinase, putative            | 78   | 118  | 144  | 140  | 164  | 119  | 114  | 141  | 0.80     | 0.302058 | 92   | 85   | 93   | 143  | 109  | 121  | 131  | 129  | 90   | 126  | 0.71     | 0.003057 | 124  | 0.72     | 0.027739  |
| 251911_at   | A13g53820 | putative C2H2-type zinc finger protein : zinc finger (C2H2 type) family protein     | 9    | 8    | 12   | 13   | 11   | 13   | 10   | 13   | 0.78     | 0.137493 | 13   | 8    | 12   | 13   | 10   | 8    | 15   | 10   | 11   | 11   | 0.97     | 0.879554 | 10   | 1.07     | 0.748365  |
| 251912_at   | A13g53840 | protein kinase-like protein wall-assoia protein kinase family protein               | 51   | 66   | 79   | 68   | 82   | 74   | 65   | 75   | 0.87     | 0.339685 | 40   | 47   | 57   | 47   | 40   | 39   | 45   | 44   | 48   | 43   | 1.12     | 0.251702 | 42   | 1.15     | 0.331194  |
| 251913_at   | A13g53910 | outative protein several malat delivdroc malate dehydrogenase-related               | 15   | 11   | 14   | 14   | 18   | 15   | 13   | 16   | 0.86     | 0.244026 | 12   | 16   | 17   | 13   | 11   | 16   | 13   | 11   | 15   | 13   | 1.22     | 0.167917 | 13   | 1.17     | 0.384092  |
| 251914_at   | A13g53930 | outative protein serine/threonine-specific kinase family protein                    | 87   | 113  | 119  | 133  | 147  | 108  | 100  | 120  | 0.89     | 0.212465 | 97   | 81   | 133  | 108  | 97   | 113  | 115  | 103  | 108  | 106  | 0.86     | 0.185692 | 114  | 0.83     | 0.234636  |
| 251915_at   | A13g53950 | putative protein peroxisomal CA-deper mitochondrial substrate carbox family pr      | 188  | 174  | 191  | 281  | 249  | 229  | 178  | 253  | 0.70     | 0.018711 | 138  | 153  | 169  | 254  | 186  | 177  | 194  | 179  | 154  | 198  | 0.78     | 0.070280 | 205  | 0.75     | 0.115695  |
| 251916_at   | A13g53960 | transporter-like protein oligopeptide tr transport-dependent oligopeptide transport | 49   | 60   | 72   | 86   | 76   | 60   | 76   | 60   | 0.75     | 0.054802 | 30   | 41   | 43   | 53   | 49   | 43   | 51   | 47   | 38   | 47   | 0.82     | 0.172636 | 45   | 0.84     | 0.384599  |
| 251917_at   | A13g53970 | putative protein proteasome inhibitor-related                                       | 238  | 326  | 346  | 376  | 428  | 348  | 303  | 384  | 0.79     | 0.117132 | 357  | 430  | 385  | 594  | 463  | 416  | 420  | 400  | 391  | 459  | 0.85     | 0.220557 | 491  | 0.80     | 0.154798  |
| 251918_at   | A13g54000 | chotossimilate-resonsive protein PA photoassimilate-resonsive protein-relat         | 41   | 51   | 60   | 51   | 49   | 51   | 49   | 51   | 0.99     | 0.905161 | 47   | 44   | 51   | 59   | 43   | 47   | 57   | 54   | 47   | 52   | 0.91     | 0.305603 | 50   | 0.95     | 0.636941  |
| 251919_at   | A13g53800 | outative protein Hso70 binding protein armadillo/beta-caterin reepeat family crot   | 73   | 92   | 92   | 72   | 94   | 76   | 86   | 81   | 1.06     | 0.634400 | 88   | 99   | 93   | 77   | 72   | 93   | 87   | 93   | 77   | 1.21 | 0.117746 | 69       | 1.36 | 0.023961 |           |
| 251920_at   | A13g53940 | uracil chosorhoribosyltransferase-like uracil chosorhoribosyltransferase, outativ   | 306  | 377  | 347  | 444  | 459  | 373  | 343  | 425  | 0.81     | 0.071309 | 348  | 335  | 395  | 505  | 418  | 379  | 388  | 356  | 360  | 409  | 0.88     | 0.229682 | 434  | 0.83     | 0.148291  |
| 251921_at   | A13g53890 | 40S ribosomal protein S21 homolog r1 40S ribosomal protein S21 (RPS21B)             | 3329 | 3691 | 3321 | 4016 | 4423 | 3915 | 3647 | 4118 | 0.89     | 0.112059 | 3595 | 3532 | 3800 | 4721 | 4164 | 3627 | 4173 | 3995 | 3642 | 4136 | 0.88     | 0.087956 | 4171 | 0.87     | 0.180164  |
| 251922_at   | A13g53900 | putative protein kinase-like protein kinase family protein                          | 53   | 66   | 72   | 67   | 69   | 76   | 64   | 81   | 0.79     | 0.071309 | 358  | 335  | 395  | 505  | 418  | 379  | 388  | 356  | 360  | 409  | 0.88     | 0.229682 | 434  | 0.83     | 0.148291  |
| 251923_at   | A13g53820 | putative C2H2-type zinc finger protein : zinc finger (C2H2 type) family protein     | 9    | 8    | 12   | 13   | 11   | 13   | 10   | 13   | 0.78     | 0.137493 | 13   | 8    | 12   | 13   | 10   | 8    | 15   | 10   | 11   | 11   | 0.97     | 0.879554 | 10   | 1.07     | 0.748365  |
| 251924_at   | A13g54000 | hyptothetical protein - supported by full-len expressed protein                     | 477  | 441  | 536  | 759  | 855  | 620  | 485  | 744  | 0.65     | 0.024932 | 385  | 366  | 365  | 525  | 388  | 390  | 448  | 446  | 372  | 440  | 0.85     | 0.093343 | 434  | 0.86     | 0.246799  |
| 251925_at   | A13g53740 | 60S RIBOSOMAL PROTEIN L36 hom 60S ribosomal protein L36 (RPL36B)                    | 2452 | 2843 | 3168 | 2894 | 3189 | 2812 | 2688 | 2965 | 1.06     | 0.688074 | 2384 | 2333 | 2470 | 2935 | 2504 | 2313 | 2971 | 2807 | 2389 | 2726 | 0.88     | 0.110708 | 2584 | 0.92     | 0.358311  |
| 251927_at   | A13g53920 | hyptothetical protein ER6 protein - Lrrc universal stress protein (USP) family pr   | 1929 | 1810 | 2277 | 2078 | 2463 | 1916 | 2005 | 2150 | 0.93     | 0.535853 | 2242 | 2376 | 2147 | 2919 | 2877 | 2902 | 2862 | 2772 | 2919 | 2862 | 0.85     | 0.072877 | 2638 | 0.89     | 0.269811  |
| 251928_at   | A13g53980 | putative protein hyptothetical protein At permeabilin/solubilizer/solubilic tran    | 38   | 53   | 68   | 66   | 61   | 58   | 53   | 61   | 0.86     | 0.39102  | 53   | 60   | 58   | 62   | 42   | 49   | 66   | 58   | 57   | 55   | 1.03     | 0.798716 | 51   | 1.11     | 0.407165  |
| 251929_at   | A13g53920 | putative protein hyptothetical protein At permeabilin/solubilizer/solubilic tran    | 38   | 53   | 68   | 66   | 61   | 58   | 53   | 61   | 0.86     | 0.39102  | 53   | 60   | 58   | 62   | 42   | 49   | 66   | 58   | 57   | 55   | 1.03     | 0.798716 | 51   | 1.11     | 0.407165  |
| 251930_at   | A13g53780 | outative protein several hyptothetical on rhomboid family protein                   | 177  | 229  | 207  | 227  | 266  | 181  | 190  | 225  | 0.85     | 0.410950 | 203  | 183  | 221  | 305  | 255  | 235  | 226  | 215  | 202  | 247  | 0.82     | 0.093511 | 265  | 0.76     | 0.055628  |
| 251931_at   | A13g53950 | outative protein several hyptothetical on rhomboid family protein                   | 177  | 229  | 207  | 227  | 266  | 181  | 190  | 225  | 0.85     | 0.410950 | 203  | 183  | 221  | 305  | 255  | 235  | 226  | 215  | 202  | 247  | 0.82     | 0.093511 | 265  | 0.76     | 0.055628  |
| 251932_at   | A13g54010 | putative protein hyptothetical protein At permeabilin/solubilizer/solubilic tran    | 38   | 53   | 68   | 66   | 61   | 58   | 53   | 61   | 0.86     | 0.39102  | 53   | 60   | 58   | 62   | 42   | 49   | 66   | 58   | 57   | 55   | 1.0      |          |      |          |           |

|           |           |                                                                                      |      |      |      |      |      |      |      |      |      |          |      |      |      |      |      |      |      |      |      |      |      |           |      |      |          |
|-----------|-----------|--------------------------------------------------------------------------------------|------|------|------|------|------|------|------|------|------|----------|------|------|------|------|------|------|------|------|------|------|------|-----------|------|------|----------|
| 251850_at | A13g54650 | F-box protein family, AFB1L7 contains F-box family protein (FBL17)                   | 235  | 328  | 308  | 335  | 340  | 260  | 290  | 312  | 0.93 | 0.61844  | 220  | 210  | 253  | 254  | 227  | 218  | 239  | 217  | 228  | 231  | 0.98 | 0.800737  | 233  | 0.98 | 0.761835 |
| 251851_at | A13g54670 | structural maintenance of chromosomes structural maintenance of chromosomes          | 452  | 581  | 567  | 625  | 666  | 488  | 530  | 593  | 0.90 | 0.426539 | 372  | 310  | 401  | 505  | 439  | 338  | 454  | 449  | 361  | 437  | 0.83 | 0.116296  | 427  | 0.84 | 0.299044 |
| 251852_at | A13g54750 | putative protein                                                                     | 314  | 435  | 336  | 449  | 508  | 369  | 362  | 442  | 0.82 | 0.216022 | 346  | 258  | 312  | 457  | 393  | 325  | 459  | 418  | 305  | 410  | 0.74 | 0.032203  | 391  | 0.78 | 0.134023 |
| 251853_at | A13g54760 | putative protein various Arabidopsis thaliana                                        | 250  | 291  | 279  | 335  | 242  | 250  | 285  | 241  | 0.81 | 0.17189  | 247  | 203  | 214  | 282  | 214  | 212  | 219  | 217  | 214  | 217  | 0.93 | 0.275918  | 226  | 0.94 | 0.09410  |
| 251854_at | A13g54800 | putative protein various Arabidopsis thaliana                                        | 90   | 89   | 101  | 88   | 119  | 73   | 94   | 93   | 1.00 | 0.986088 | 52   | 45   | 55   | 46   | 48   | 45   | 46   | 44   | 51   | 46   | 1.11 | 0.079037  | 46   | 1.09 | 0.246295 |
| 251855_at | A13g54690 | putative protein various Arabidopsis thaliana                                        | 314  | 435  | 336  | 449  | 508  | 369  | 362  | 442  | 0.82 | 0.216022 | 346  | 258  | 312  | 457  | 393  | 325  | 459  | 418  | 305  | 410  | 0.74 | 0.032203  | 391  | 0.78 | 0.134023 |
| 251856_at | A13g54720 | Peptidase - like protein leucyl aminopeptidase, glutamate carboxypeptidase, putative | 228  | 242  | 308  | 289  | 305  | 235  | 276  | 276  | 1.00 | 0.987260 | 244  | 231  | 255  | 384  | 317  | 459  | 377  | 449  | 389  | 313  | 0.58 | 0.051700  | 484  | 0.65 | 0.083604 |
| 251857_at | A13g54730 | putative protein various Arabidopsis thaliana                                        | 314  | 435  | 336  | 449  | 508  | 369  | 362  | 442  | 0.82 | 0.216022 | 346  | 258  | 312  | 457  | 393  | 325  | 459  | 418  | 305  | 410  | 0.74 | 0.032203  | 391  | 0.78 | 0.134023 |
| 251858_at | A13g54820 | putative protein various Arabidopsis thaliana                                        | 463  | 653  | 702  | 1268 | 1175 | 1131 | 606  | 1191 | 0.51 | 0.002156 | 887  | 844  | 1017 | 2096 | 1650 | 1396 | 1381 | 1332 | 916  | 1571 | 0.58 | 0.014852  | 1714 | 0.53 | 0.019444 |
| 251859_at | A13g54680 | putative protein various Arabidopsis thaliana                                        | 82   | 101  | 98   | 129  | 129  | 113  | 94   | 124  | 0.76 | 0.016892 | 77   | 105  | 96   | 163  | 105  | 98   | 118  | 105  | 93   | 118  | 0.79 | 0.088794  | 127  | 0.76 | 0.260049 |
| 251860_at | A13g54660 | Glutathione reductase, chloroplast ote glutathione reductase, chloroplast            | 243  | 385  | 370  | 375  | 417  | 305  | 333  | 366  | 0.91 | 0.587642 | 203  | 187  | 240  | 326  | 285  | 225  | 242  | 237  | 210  | 263  | 0.80 | 0.101575  | 279  | 0.75 | 0.108141 |
| 251861_at | A13g54680 | putative protein various Arabidopsis thaliana                                        | 193  | 136  | 210  | 186  | 233  | 186  | 180  | 202  | 0.89 | 0.426792 | 218  | 218  | 184  | 230  | 170  | 158  | 230  | 215  | 193  | 201  | 0.96 | 0.755824  | 186  | 0.75 | 0.791014 |
| 251862_at | A13g54650 | putative protein various Arabidopsis thaliana                                        | 235  | 328  | 308  | 335  | 340  | 260  | 290  | 312  | 0.93 | 0.61844  | 220  | 210  | 253  | 254  | 227  | 218  | 239  | 217  | 228  | 231  | 0.98 | 0.800737  | 233  | 0.98 | 0.761835 |
| 251863_at | A13g54870 | putative protein various Arabidopsis thaliana                                        | 928  | 1139 | 1024 | 922  | 1043 | 791  | 1030 | 918  | 1.12 | 0.303287 | 895  | 906  | 865  | 1180 | 954  | 787  | 1170 | 1111 | 889  | 1041 | 0.85 | 0.182240  | 974  | 0.91 | 0.499269 |
| 251864_at | A13g54930 | protein choshatase 2A regulator sut serine/threonine protein choshatase 2A           | 70   | 76   | 83   | 94   | 112  | 81   | 76   | 96   | 0.80 | 0.192229 | 68   | 65   | 78   | 91   | 85   | 73   | 81   | 73   | 70   | 81   | 0.87 | 0.103178  | 83   | 0.85 | 0.124426 |
| 251865_at | A13g54940 | putative protein various Arabidopsis thaliana                                        | 17   | 22   | 28   | 30   | 29   | 25   | 22   | 141  | 0.16 | 0.357544 | 178  | 218  | 184  | 230  | 170  | 158  | 230  | 215  | 193  | 201  | 0.96 | 0.755824  | 186  | 0.75 | 0.791014 |
| 251866_at | A13g54950 | putative protein various Arabidopsis thaliana                                        | 235  | 328  | 308  | 335  | 340  | 260  | 290  | 312  | 0.93 | 0.61844  | 220  | 210  | 253  | 254  | 227  | 218  | 239  | 217  | 228  | 231  | 0.98 | 0.800737  | 233  | 0.98 | 0.761835 |
| 251867_at | A13g54970 | putative protein various Arabidopsis thaliana                                        | 36   | 49   | 56   | 46   | 61   | 53   | 47   | 53   | 0.88 | 0.433099 | 33   | 35   | 40   | 40   | 32   | 32   | 35   | 32   | 36   | 34   | 1.05 | 0.527695  | 35   | 1.03 | 0.774189 |
| 251868_at | A13g54970 | putative protein various Arabidopsis thaliana                                        | 194  | 250  | 304  | 313  | 355  | 311  | 249  | 328  | 0.76 | 0.091643 | 207  | 224  | 243  | 334  | 244  | 241  | 255  | 225  | 225  | 260  | 0.87 | 0.238900  | 273  | 0.82 | 0.211025 |
| 251869_at | A13g55000 | Expressed protein : supported by full-length tonneau family protein                  | 255  | 317  | 331  | 364  | 347  | 302  | 301  | 338  | 0.89 | 0.284338 | 245  | 289  | 283  | 423  | 319  | 312  | 315  | 291  | 272  | 322  | 0.82 | 0.115779  | 351  | 0.78 | 0.109946 |
| 251870_at | A13g54890 | chlorophyll a/b-binding protein : suopco chlorophyll A-B binding protein / LHCI tv   | 2270 | 3833 | 3442 | 3184 | 3589 | 2485 | 3182 | 3086 | 1.03 | 0.875903 | 3067 | 3386 | 2874 | 4057 | 3449 | 3244 | 3739 | 3753 | 3109 | 3648 | 0.85 | 0.046425  | 3583 | 0.87 | 0.172658 |
| 251871_at | A13g54990 | Expressed protein : supported by cDNF protein 1 (CAXIP1)                             | 182  | 243  | 232  | 272  | 286  | 238  | 219  | 255  | 0.83 | 0.120088 | 200  | 199  | 219  | 326  | 276  | 225  | 230  | 222  | 206  | 255  | 0.81 | 0.112788  | 275  | 0.75 | 0.076730 |
| 251872_at | A13g54840 | small GTP-binding protein - like (fragm Rab GTPase (ARAB))                           | 455  | 592  | 648  | 761  | 770  | 601  | 565  | 711  | 0.79 | 0.139254 | 647  | 638  | 688  | 1028 | 787  | 759  | 705  | 674  | 658  | 790  | 0.83 | 0.165355  | 868  | 0.77 | 0.081598 |
| 251873_at | A13g54880 | vacuolar protein sortin protein 33a-lik vacuolar protein sorting protein, putative   | 197  | 297  | 293  | 297  | 360  | 233  | 262  | 297  | 0.88 | 0.518757 | 236  | 229  | 249  | 344  | 252  | 243  | 298  | 286  | 238  | 285  | 0.84 | 0.106389  | 280  | 0.85 | 0.273130 |
| 251874_at | A13g55030 | choshatid phosphatase synthase choshatid phosphatase synthase                        | 318  | 488  | 575  | 581  | 614  | 530  | 461  | 575  | 0.80 | 0.227202 | 453  | 506  | 529  | 772  | 580  | 536  | 557  | 534  | 496  | 596  | 0.83 | 0.158622  | 629  | 0.79 | 0.153677 |
| 251875_at | A13g54940 | putative protein various Arabidopsis thaliana                                        | 153  | 205  | 183  | 215  | 242  | 153  | 222  | 268  | 0.85 | 0.130308 | 190  | 213  | 228  | 339  | 285  | 229  | 324  | 229  | 324  | 333  | 0.77 | 0.091511  | 324  | 0.80 | 0.236572 |
| 251876_at | A13g55050 | putative protein various Arabidopsis thaliana                                        | 229  | 270  | 280  | 302  | 367  | 262  | 260  | 310  | 0.84 | 0.213249 | 216  | 205  | 210  | 280  | 239  | 225  | 257  | 253  | 210  | 251  | 0.84 | 0.018000  | 248  | 0.85 | 0.089046 |
| 251877_at | A13g55060 | centromere protein - like centromere p SET domain-containing protein                 | 61   | 72   | 72   | 66   | 67   | 59   | 68   | 64   | 1.07 | 0.393723 | 44   | 39   | 50   | 51   | 41   | 34   | 40   | 38   | 44   | 41   | 1.08 | 0.470752  | 42   | 1.05 | 0.724477 |
| 251878_at | A13g55080 | putative protein                                                                     | 73   | 122  | 117  | 105  | 126  | 91   | 104  | 107  | 0.97 | 0.870076 | 108  | 115  | 108  | 145  | 115  | 105  | 143  | 132  | 110  | 128  | 0.86 | 0.144008  | 122  | 0.91 | 0.401519 |
| 251879_at | A13g55090 | ABC transporter - like protein ATP-Bin ABC transporter family protein                | 19   | 25   | 25   | 27   | 25   | 23   | 21   | 25   | 0.86 | 0.105123 | 16   | 17   | 18   | 19   | 15   | 16   | 22   | 18   | 17   | 18   | 0.95 | 0.671857  | 17   | 1.03 | 0.743593 |
| 251880_at | A13g55100 | ABC transporter - like protein ATP-Bin ABC transporter family protein                | 29   | 37   | 48   | 46   | 46   | 46   | 38   | 46   | 0.83 | 0.226599 | 21   | 22   | 31   | 29   | 26   | 25   | 32   | 28   | 25   | 28   | 0.88 | 0.295255  | 26   | 0.93 | 0.620596 |
| 251881_at | A13g55110 | ABC transporter - like protein ATP-Bin ABC transporter family protein                | 122  | 175  | 144  | 240  | 247  | 204  | 147  | 230  | 0.64 | 0.014892 | 115  | 112  | 164  | 265  | 213  | 169  | 161  | 156  | 130  | 193  | 0.67 | 0.0183010 | 216  | 0.60 | 0.057774 |
| 251882_at | A13g55120 | chalcone isomerase - supported by full - chalcone-flavanone isomerase / chalcon      | 112  | 106  | 134  | 193  | 133  | 156  | 147  | 161  | 0.91 | 0.676987 | 270  | 287  | 351  | 418  | 274  | 212  | 228  | 214  | 303  | 269  | 1.12 | 0.565455  | 301  | 1.00 | 0.986107 |
| 251883_at | A13g55070 | putative protein various Arabidopsis thaliana                                        | 155  | 265  | 255  | 311  | 384  | 274  | 282  | 303  | 0.75 | 0.133098 | 266  | 243  | 246  | 334  | 285  | 339  | 304  | 247  | 323  | 364  | 0.77 | 0.050510  | 324  | 0.76 | 0.214656 |
| 251884_at | A13g55020 | putative protein KIAA0882 protein, Hoi RabGAP/TBC domain-containing protein          | 90   | 105  | 107  | 145  | 136  | 103  | 101  | 128  | 0.79 | 0.171822 | 48   | 42   | 56   | 69   | 47   | 51   | 60   | 58   | 40   | 57   | 0.85 | 0.214315  | 56   | 0.88 | 0.439549 |
| 251885_at | A13g55010 | choshoribosylformylvinamidine cvc choshoribosylformylvinamidine cvck                 | 431  | 467  | 501  | 534  | 525  | 458  | 466  | 505  | 0.92 | 0.283584 | 482  | 497  | 552  | 782  | 557  | 544  | 568  | 546  | 510  | 599  | 0.85 | 0.207363  | 628  | 0.81 | 0.217069 |
| 251886_at | A13g55140 | pectate lyase - like protein pectate lyase pectate lyase family protein              | 277  | 407  | 416  | 390  | 469  | 343  | 367  | 400  | 0.92 | 0.592706 | 408  | 448  | 430  | 698  | 529  | 499  | 475  | 455  | 429  | 531  | 0.81 | 0.130717  | 575  | 0.74 | 0.080552 |
| 251887_at | A13g55150 | putative protein various Arabidopsis thaliana                                        | 29   | 36   | 32   | 33   | 32   | 28   | 32   | 36   | 0.86 | 0.410066 | 20   | 29   | 20   | 25   | 19   | 22   | 26   | 23   | 23   | 23   | 0.91 | 0.926982  | 22   | 0.96 | 0.738682 |
| 251888_at | A13g55160 | putative protein various Arabidopsis thaliana                                        | 103  | 133  | 134  | 144  | 148  | 103  | 107  | 124  | 0.86 | 0.356504 | 59   | 53   | 63   | 81   | 68   | 65   | 83   | 69   | 62   | 70   | 0.93 | 0.496661  | 69   | 0.92 | 0.558172 |
| 251889_at | A13g55170 | ribosomal protein L35 - like various ribo 60S ribosomal protein L35 (RPL35C)         | 117  | 133  | 134  | 147  | 155  | 124  | 128  | 142  | 0.91 | 0.271005 | 100  | 126  | 128  | 144  | 115  | 109  | 109  | 103  | 118  | 116  | 1.01 | 0.887563  | 123  | 0.96 | 0.736286 |
| 251890_at | A13g55180 | lipase - like protein monoglyceride lipase esterase/lipase/thioesterase family prote | 21   | 25   | 28   | 27   | 27   | 26   | 24   | 27   | 0.92 | 0.341062 | 19   | 18   | 20   | 22   | 17   | 20   | 22   | 20   | 19   | 20   | 0.93 | 0.354506  | 20   | 0.96 | 0.629451 |
| 251891_at | A13g55190 | lipase - like protein monoglyceride lipase esterase/lipase/thioesterase family prote | 13   | 12   | 12   | 6    | 10   | 8    | 13   | 8    | 1.53 | 0.014818 | 7    | 7    | 8    | 6    | 6    | 6    | 10   | 7    | 12   | 13   | 0.96 | 0.196781  | 6    | 1.43 | 0.036516 |
| 251892_at | A13g55200 | salicic acid - like protein salicic acid salicic acid, putative                      | 704  | 825  | 847  | 923  | 792  | 913  | 792  | 913  | 0.87 | 0.062007 | 636  | 569  | 705  | 847  | 744  | 686  | 718  | 621  | 716  | 718  | 0.86 | 0.143167  | 743  | 0.85 | 0.266609 |
| 251893_at | A13g55250 | putative protein predicted pectate-lyase expressed protein                           | 71   | 232  | 240  | 255  | 251  | 215  | 214  | 241  | 0.89 | 0.348998 | 219  | 274  | 258  | 374  | 246  | 257  | 315  | 292  | 250  | 296  | 0.85 | 0.203553  | 291  | 0.86 | 0.395621 |
| 251894_at | A13g55300 | putative protein various predicted prot tectin protein kinase, putative              | 17   | 20   | 21   | 28   | 20   | 16   | 23   | 20   | 0.76 | 0.141862 | 15   | 12   | 14   | 15   | 12   | 15   | 12   | 17   | 14   | 14   | 0.95 | 0.619505  | 14   | 0.98 | 0.798335 |
| 251895_at | A13g55310 | beta-ketohydroxy-ACP reductase - like pro short-chain dehydrogenase/reductase (E     | 220  | 324  | 269  | 617  | 818  | 510  | 281  | 648  | 0.43 | 0.16822  | 171  | 160  | 166  | 569  | 459  | 429  | 431  | 400  | 316  | 467  | 0.36 | 0.003031  | 486  | 0.34 | 0.001727 |
| 251896_at | A13g55320 | putative protein various Arabidopsis thaliana                                        | 121  | 143  | 148  | 175  | 190  | 148  | 137  | 171  | 0.86 | 0.130308 | 190  | 213  | 228  | 339  | 285  | 339  | 304  | 247  | 323  | 364  | 0.77 | 0.050510  | 324  | 0.76 |          |

|             |           |                                                                                    |      |      |      |      |      |      |      |      |          |          |          |      |      |      |      |      |      |      |      |      |          |          |          |          |          |          |
|-------------|-----------|------------------------------------------------------------------------------------|------|------|------|------|------|------|------|------|----------|----------|----------|------|------|------|------|------|------|------|------|------|----------|----------|----------|----------|----------|----------|
| 251762_at   | A13g55800 | sedoheptulose-bisphosphatase precursor sedoheptulose-1,7-bisphosphatase, chlc      | 381  | 551  | 448  | 579  | 595  | 464  | 546  | 0.84 | 0.254224 | 598      | 617      | 585  | 940  | 680  | 623  | 781  | 695  | 600  | 744  | 0.81 | 0.099931 | 748      | 0.80     | 0.207056 |          |          |
| 251763_at   | A13g55730 | MYB transcription factor - like protein F myb family transcription factor (MYB109  | 381  | 127  | 129  | 141  | 168  | 133  | 117  | 147  | 0.80     | 0.116351 | 116      | 121  | 119  | 168  | 128  | 129  | 134  | 114  | 119  | 134  | 0.88     | 0.246088 | 142      | 0.84     | 0.164708 |          |
| 251764_at   | A13g55830 | autative protein exocyst-related repressor G glycosyltransferase family protein 47 | 146  | 218  | 207  | 268  | 298  | 225  | 190  | 264  | 0.72     | 0.075636 | 192      | 211  | 198  | 368  | 259  | 269  | 267  | 252  | 200  | 283  | 0.71     | 0.028794 | 298      | 0.67     | 0.050104 |          |
| 251765_at   | A13g55860 | autative protein PA26_e53 regulated F expressed protein                            | 31   | 31   | 42   | 47   | 39   | 31   | 27   | 42   | 0.86     | 0.380707 | 26       | 37   | 37   | 96   | 30   | 30   | 31   | 30   | 30   | 30   | 0.75     | 0.735723 | 30       | 0.95     | 0.100767 |          |
| 251766_at   | A13g55910 | autative protein PA26_e53 regulated F expressed protein                            | 22   | 25   | 33   | 32   | 32   | 31   | 27   | 32   | 0.84     | 0.209306 | 33       | 28   | 28   | 31   | 29   | 31   | 32   | 27   | 29   | 30   | 0.98     | 0.720845 | 30       | 0.97     | 0.662358 |          |
| 251767_at   | A13g55930 | putative protein U4/U6 small nuclear rRNA splicing factor-related                  | 34   | 38   | 58   | 63   | 59   | 55   | 43   | 59   | 0.74     | 0.114849 | 31       | 27   | 38   | 31   | 29   | 30   | 35   | 33   | 32   | 32   | 1.01     | 0.888066 | 30       | 1.07     | 0.517374 |          |
| 251768_at   | A13g55940 | phosphoinositide-specific phospholipase C phosphoinositide-specific phospholipase  | 28   | 35   | 35   | 34   | 38   | 36   | 33   | 36   | 0.90     | 0.250750 | 29       | 39   | 41   | 33   | 27   | 36   | 38   | 36   | 34   | 1.06 | 0.590624 | 32       | 1.12     | 0.429634 |          |          |
| 251769_at   | A13g55950 | phosphoinositide kinase - like protein kinase family protein                       | 84   | 119  | 88   | 101  | 81   | 88   | 119  | 92   | 1.05     | 0.723188 | 55       | 49   | 58   | 46   | 48   | 56   | 47   | 52   | 46   | 60   | 1.11     | 0.193667 | 47       | 1.07     | 0.022311 |          |
| 251770_at   | A13g55970 | leucanthranolcanidin dioxygenase - like i oxidoreductase, 2OG-Fe(II) oxovanone i   | 18   | 19   | 24   | 27   | 21   | 20   | 23   | 0.86 | 0.289549 | 17       | 18       | 45   | 16   | 18   | 16   | 24   | 17   | 27   | 18   | 1.46 | 0.272687 | 17       | 1.50     | 0.340858 |          |          |
| 251771_at   | A13g56000 | autative protein cellulose synthase (ce glycosyl transferase family 2 protein      | 20   | 28   | 32   | 26   | 21   | 17   | 27   | 18   | 1.47     | 0.097436 | 43       | 64   | 35   | 37   | 33   | 35   | 54   | 57   | 47   | 43   | 1.10     | 0.670533 | 35       | 1.36     | 0.217351 |          |
| 251772_at   | A13g55920 | cvcloohin-like protein ROCT_cvcloohi oexidi-ovrcl- cis-trans isomerase, outal      | 291  | 352  | 318  | 360  | 438  | 308  | 320  | 369  | 0.87     | 0.309527 | 369      | 375  | 369  | 519  | 439  | 378  | 383  | 383  | 371  | 419  | 0.89     | 0.232345 | 443      | 0.84     | 0.155790 |          |
| 251773_at   | A13g55960 | Yioyce-like protein Yioyce protein, Ho yippee family protein                       | 291  | 280  | 400  | 425  | 538  | 375  | 324  | 446  | 0.73     | 0.118513 | 363      | 356  | 346  | 529  | 446  | 381  | 390  | 370  | 355  | 423  | 0.84     | 0.133816 | 452      | 0.78     | 0.086325 |          |
| 251774_at   | A13g55940 | nematode resistance protein-like kinase expressed protein                          | 25   | 23   | 33   | 25   | 23   | 24   | 27   | 24   | 1.12     | 0.247007 | 16       | 23   | 22   | 18   | 15   | 12   | 19   | 15   | 20   | 16   | 1.30     | 0.081500 | 15       | 1.36     | 0.123702 |          |
| 251740_at   | A13g56070 | peptidylprolyl isomerase peptidyl-prolyl cis-trans isomerase, putal                | 680  | 905  | 916  | 1151 | 1128 | 932  | 834  | 1070 | 0.78     | 0.084723 | 735      | 830  | 858  | 1126 | 935  | 861  | 907  | 829  | 807  | 932  | 0.87     | 0.145782 | 974      | 0.83     | 0.128432 |          |
| 251741_at   | A13g56040 | autative protein predicted protein, Aarat expressed protein                        | 87   | 144  | 135  | 132  | 152  | 112  | 122  | 132  | 0.92     | 0.659256 | 92       | 87   | 103  | 130  | 99   | 95   | 105  | 93   | 94   | 105  | 0.90     | 0.317392 | 108      | 0.87     | 0.311199 |          |
| 251742_at   | A13g56050 | autative protein kinase serine threonine protein kinase family protein             | 334  | 389  | 461  | 562  | 558  | 487  | 395  | 535  | 0.74     | 0.033373 | 230      | 228  | 291  | 378  | 307  | 276  | 283  | 286  | 250  | 306  | 0.82     | 0.100693 | 321      | 0.78     | 0.124448 |          |
| 251743_at   | A13g56080 | autative protein CHLOROPLAST 30S i expressed protein                               | 99   | 161  | 155  | 153  | 167  | 131  | 138  | 150  | 0.92     | 0.613549 | 149      | 177  | 162  | 251  | 160  | 171  | 208  | 192  | 163  | 197  | 0.83     | 0.179142 | 194      | 0.84     | 0.353100 |          |
| 251745_at   | A13g55980 | autative protein zinc finger transcription zinc finger (CCHC-type) family protein  | 679  | 512  | 733  | 976  | 1022 | 626  | 641  | 874  | 0.73     | 0.175123 | 160      | 192  | 146  | 316  | 216  | 218  | 316  | 300  | 166  | 273  | 0.61     | 0.016246 | 250      | 0.66     | 0.078195 |          |
| 251746_at   | A13g56060 | mandelonitrile lyase-like protein ADHEI glucose-methanol-choline (GMC) oxidor      | 14   | 14   | 14   | 12   | 17   | 11   | 14   | 13   | 1.05     | 0.722842 | 11       | 26   | 13   | 11   | 14   | 9    | 12   | 8    | 17   | 11   | 1.49     | 0.191427 | 12       | 1.41     | 0.377310 |          |
| 251716_at   | A13g55870 | anthranilate synthase alpha-1 chain -i anthranilate synthase, alpha subunit, pu    | 24   | 27   | 43   | 37   | 37   | 40   | 31   | 38   | 0.82     | 0.310068 | 20       | 24   | 28   | 23   | 25   | 20   | 41   | 22   | 24   | 26   | 0.91     | 0.672087 | 23       | 1.06     | 0.646340 |          |
| 251717_at   | A13g55850 | autative protein EXOENZYMES REGI amidothiolase family protein                      | 133  | 205  | 210  | 234  | 284  | 218  | 189  | 245  | 0.77     | 0.107087 | 177      | 171  | 194  | 290  | 239  | 203  | 217  | 216  | 181  | 233  | 0.77     | 0.047831 | 244      | 0.74     | 0.072249 |          |
| 251718_at   | A13g56100 | autative protein hyvothermal proteins - i, leucine-rich repeat transmembrane prot  | 151  | 251  | 115  | 178  | 100  | 133  | 133  | 167  | 0.79     | 0.164770 | 106      | 68   | 118  | 137  | 118  | 102  | 110  | 105  | 97   | 114  | 0.85     | 0.260066 | 119      | 0.82     | 0.288093 |          |
| 251719_at   | A13g56140 | autative protein PUTATIVE PROTEIN expressed protein                                | 93   | 132  | 138  | 395  | 209  | 300  | 185  | 303  | 231      | 1.31     | 0.353801 | 176  | 174  | 172  | 218  | 202  | 164  | 221  | 210  | 174  | 203      | 0.86     | 0.081933 | 194      | 0.90     | 0.273143 |
| 251720_at   | A13g56160 | putative protein expressed protein                                                 | 93   | 132  | 132  | 141  | 157  | 137  | 119  | 145  | 0.82     | 0.147239 | 104      | 94   | 103  | 141  | 111  | 110  | 120  | 108  | 100  | 118  | 0.85     | 0.083498 | 120      | 0.83     | 0.136455 |          |
| 251721_s_at | A13g56190 | alpha-soluble NSF attachment protein, alpha-soluble NSF attachment protein 2       | 297  | 362  | 375  | 385  | 407  | 339  | 345  | 377  | 0.91     | 0.359633 | 408      | 408  | 453  | 549  | 460  | 430  | 445  | 449  | 423  | 459  | 0.92     | 0.340155 | 480      | 0.88     | 0.216410 |          |
| 251722_at   | A13g56200 | putative protein neuronal glutamine t amino acid transporter family protein        | 67   | 53   | 75   | 84   | 75   | 67   | 65   | 75   | 0.86     | 0.275123 | 53       | 59   | 66   | 75   | 57   | 53   | 70   | 66   | 59   | 64   | 0.93     | 0.463999 | 62       | 0.97     | 0.781643 |          |
| 251723_at   | A13g56230 | autative protein seckoe-like protein. E speckle-type POZ protein-related           | 21   | 25   | 27   | 29   | 35   | 29   | 24   | 31   | 0.78     | 0.054770 | 17       | 23   | 23   | 23   | 21   | 21   | 23   | 25   | 21   | 23   | 0.93     | 0.048876 | 22       | 0.97     | 0.772512 |          |
| 251724_at   | A13g56250 | putative protein expressed protein                                                 | 71   | 70   | 74   | 69   | 86   | 71   | 72   | 75   | 0.95     | 0.552730 | 57       | 68   | 64   | 73   | 72   | 62   | 69   | 59   | 63   | 67   | 0.94     | 0.044673 | 69       | 0.91     | 0.272441 |          |
| 251725_at   | A13g56260 | putative protein expressed protein                                                 | 65   | 68   | 66   | 87   | 78   | 65   | 83   | 0.93 | 0.457629 | 68       | 68       | 63   | 67   | 64   | 67   | 63   | 65   | 70   | 66   | 62   | 0.96     | 0.485714 | 64       | 0.98     | 0.623412 |          |
| 251726_at   | A13g56280 | protein kinase NPK1-related protein kii pseudogene, protein kinase family          | 30   | 32   | 43   | 37   | 37   | 37   | 35   | 36   | 0.96     | 0.721613 | 28       | 29   | 34   | 25   | 26   | 24   | 28   | 31   | 31   | 27   | 1.13     | 0.125398 | 25       | 1.21     | 0.050679 |          |
| 251727_at   | A13g56290 | expressed protein                                                                  | 77   | 125  | 101  | 101  | 98   | 91   | 94   | 97   | 0.97     | 0.772206 | 60       | 58   | 80   | 85   | 73   | 63   | 61   | 62   | 66   | 69   | 0.96     | 0.730849 | 74       | 0.89     | 0.460992 |          |
| 251728_at   | A13g56300 | cysteine-IRNA ligase-like protein seven RNA synthetase class i (C) family prote    | 97   | 128  | 128  | 133  | 148  | 118  | 118  | 133  | 0.89     | 0.321305 | 105      | 81   | 109  | 135  | 107  | 105  | 115  | 108  | 99   | 114  | 0.86     | 0.167764 | 116      | 0.85     | 0.281793 |          |
| 251729_at   | A13g56310 | alpha-oalactosidase-like protein alpha_ alpha-oalactosidase, outative / melibase   | 851  | 853  | 893  | 896  | 1028 | 736  | 783  | 877  | 0.90     | 0.444283 | 924      | 863  | 880  | 1223 | 1108 | 937  | 1206 | 1112 | 896  | 1117 | 0.80     | 0.017609 | 1089     | 0.82     | 0.082334 |          |
| 251730_at   | A13g56330 | N2,N2-dimethylguanosine IRNA methy N2,N2-dimethylguanosine IRNA methyltr           | 62   | 72   | 76   | 74   | 75   | 73   | 70   | 74   | 0.95     | 0.394115 | 71       | 77   | 94   | 102  | 84   | 78   | 83   | 70   | 81   | 83   | 0.97     | 0.759689 | 88       | 0.91     | 0.488926 |          |
| 251731_at   | A13g56350 | mannanase superoxide dismutase-like superoxide dismutase (Mn), outative / m        | 19   | 23   | 32   | 324  | 32   | 30   | 25   | 129  | 0.19     | 0.346614 | 18       | 23   | 20   | 19   | 18   | 19   | 20   | 20   | 20   | 20   | 1.06     | 0.368843 | 19       | 1.08     | 0.343947 |          |
| 251732_at   | A13g56110 | putative protein prenylated Rab expressed prenylated rab acceptor (PRA1) family o  | 455  | 564  | 514  | 706  | 798  | 623  | 511  | 709  | 0.72     | 0.020006 | 578      | 628  | 571  | 952  | 723  | 644  | 706  | 635  | 592  | 732  | 0.81     | 0.122482 | 773      | 0.77     | 0.127266 |          |
| 251733_at   | A13g56240 | copper homeostasis factor, supported copper homeostasis factor / copper cha        | 212  | 352  | 357  | 534  | 391  | 274  | 428  | 0.84 | 0.086759 | 158      | 171      | 146  | 258  | 216  | 236  | 205  | 177  | 158  | 221  | 216  | 0.72     | 0.023457 | 240      | 0.68     | 0.008642 |          |
| 251734_at   | A13g56270 | putative protein Centrosome- and Golci expressed protein                           | 74   | 94   | 102  | 107  | 125  | 95   | 90   | 109  | 0.83     | 0.190763 | 84       | 86   | 101  | 127  | 106  | 94   | 102  | 97   | 91   | 105  | 0.86     | 0.144221 | 109      | 0.83     | 0.169533 |          |
| 251735_at   | A13g56090 | autative protein ferritin 2 precursor - i ferritin, putative                       | 792  | 1016 | 1009 | 1106 | 1388 | 1077 | 939  | 1190 | 0.79     | 0.111167 | 1525     | 1499 | 1510 | 1637 | 1595 | 1609 | 1690 | 1635 | 1512 | 1633 | 0.93     | 0.001638 | 1614     | 0.94     | 0.002193 |          |
| 251736_at   | A13g56130 | autative protein acetCoA carboxylas biotinilipoyl attachment domain-containi       | 259  | 385  | 355  | 469  | 464  | 397  | 345  | 443  | 0.78     | 0.049435 | 308      | 348  | 386  | 555  | 431  | 378  | 355  | 372  | 347  | 418  | 0.83     | 0.215217 | 455      | 0.76     | 0.132199 |          |
| 251737_at   | A13g56340 | 40S ribosomal protein S26 homolog a -i 40S ribosomal protein S26 (RPS26C)          | 2865 | 3367 | 3457 | 3697 | 3204 | 3254 | 3556 | 3562 | 0.92     | 0.273585 | 3174     | 3063 | 3391 | 3949 | 3529 | 3142 | 3814 | 3598 | 3209 | 3566 | 1.00     | 0.02485  | 3540     | 0.91     | 0.280116 |          |
| 251738_at   | A13g56150 | PROBABLE EUKARYOTIC TRANSLA ion eukaryotic translation initiation factor 3 s       | 1240 | 1464 | 1534 | 1622 | 1516 | 1401 | 1592 | 1640 | 0.90     | 0.239227 | 880      | 672  | 805  | 1078 | 856  | 789  | 1056 | 1048 | 902  | 878  | 0.82     | 0.144008 | 902      | 0.82     | 0.051983 |          |
| 251739_at   | A13g56120 | putative protein motif of unknown for Ca2+-dependent nuclease                      | 123  | 155  | 194  | 201  | 233  | 167  | 157  | 200  | 0.78     | 0.193880 | 134      | 149  | 152  | 184  | 155  | 155  | 190  | 172  | 145  | 171  | 0.85     | 0.044345 | 165      | 0.88     | 0.149288 |          |
| 251712_at   | A13g56120 | putative protein non-consensus TT dorf Met-10-like family protein                  | 220  | 287  | 239  | 332  | 353  | 275  | 267  | 320  | 0.83     | 0.182292 | 259      | 246  | 272  | 389  | 309  | 285  | 294  | 273  | 259  | 310  | 0.83     | 0.117271 | 328      | 0.79     | 0.100773 |          |
| 251713_at   | A13g56080 | autative protein several hyvothermal on dehydration-responsive protein-related     | 84   | 112  | 123  | 148  | 164  | 118  | 108  | 143  | 0.76     | 0.137429 | 76       | 74   | 80   | 117  | 95   | 94   | 106  | 103  | 76   | 103  | 0.74     | 0.033361 | 102      | 0.75     | 0.029443 |          |
| 251714_at   | A13g56130 | autative protein TAT-A-binding protein i leucine-rich repeat transmembrane prot    | 1150 | 1321 | 1281 | 1466 | 1164 | 1255 | 1365 | 152  | 0.92     | 0.450267 | 1128     | 972  | 1116 | 1402 | 1187 | 1083 | 1066 | 1049 | 1116 | 1137 | 0.88     | 0.060000 | 1102     | 0.84     | 0.027026 |          |
| 251715_at   | A13g56390 | autative protein outative WRKY-type D hypothetical protein                         | 6    | 5    | 6    | 7    | 12   | 6    | 6    | 9    | 0.66     | 0.207982 | 5        | 5    | 6    | 4    | 7    | 6    | 7    | 5    | 5    | 6    | 0.91     | 0.515771 | 6        | 0.95     | 0.775422 |          |
| 251716_at   |           |                                                                                    |      |      |      |      |      |      |      |      |          |          |          |      |      |      |      |      |      |      |      |      |          |          |          |          |          |          |

|           |           |                                                                                              |      |      |      |      |      |      |      |      |          |          |     |     |      |      |      |     |      |      |     |      |          |          |      |          |          |
|-----------|-----------|----------------------------------------------------------------------------------------------|------|------|------|------|------|------|------|------|----------|----------|-----|-----|------|------|------|-----|------|------|-----|------|----------|----------|------|----------|----------|
| 251668_at | A13g57010 | putative protein stritocidine synthase (C) stritocidine synthase family protein              | 20   | 29   | 43   | 44   | 49   | 39   | 31   | 44   | 0.70     | 0.149508 | 29  | 37  | 28   | 39   | 35   | 29  | 57   | 52   | 31  | 42   | 0.73     | 0.174107 | 34   | 0.91     | 0.471580 |
| 251669_at | A13g57180 | putative protein hypothetical protein - / expressed protein                                  | 82   | 93   | 108  | 113  | 116  | 99   | 94   | 109  | 0.86     | 0.180739 | 89  | 77  | 95   | 111  | 98   | 96  | 116  | 107  | 87  | 106  | 0.83     | 0.027844 | 102  | 0.86     | 0.112936 |
| 251670_at | A13g57190 | putative protein translation releasein fo peptide chain release factor, putative             | 44   | 68   | 61   | 58   | 57   | 48   | 57   | 54   | 1.05     | 0.720511 | 62  | 66  | 70   | 80   | 64   | 63  | 78   | 66   | 66  | 70   | 0.94     | 0.447244 | 69   | 0.96     | 0.644906 |
| 251671_at | A13g57210 | putative protein hypothetical protein                                                        | 49   | 59   | 58   | 58   | 58   | 49   | 59   | 58   | 0.92     | 0.171050 | 44  | 51  | 52   | 52   | 45   | 45  | 52   | 55   | 45  | 45   | 1.14     | 0.332273 | 52   | 1.14     | 0.332273 |
| 251672_at | A13g57230 | MADS-box transcription factor-like iso1 MADS-box protein (AGL16)                             | 55   | 64   | 80   | 76   | 76   | 70   | 67   | 74   | 0.90     | 0.385641 | 51  | 62  | 64   | 73   | 59   | 55  | 70   | 62   | 59  | 64   | 0.92     | 0.400522 | 62   | 0.94     | 0.636779 |
| 251673_at | A13g57240 | beta-1,3-glucanase                                                                           | 21   | 22   | 20   | 19   | 22   | 21   | 21   | 21   | 1.01     | 0.887844 | 15  | 14  | 26   | 16   | 18   | 16  | 21   | 17   | 18  | 18   | 1.04     | 0.819791 | 17   | 1.10     | 0.698143 |
| 251674_at | A13g57250 | hypothetical protein                                                                         | 18   | 17   | 26   | 18   | 17   | 19   | 20   | 18   | 1.12     | 0.485523 | 18  | 21  | 17   | 12   | 9    | 6   | 11   | 11   | 19  | 10   | 1.89     | 0.001915 | 9    | 2.10     | 0.007181 |
| 251675_at | A13g57260 | putative protein hypothetical protein                                                        | 372  | 564  | 585  | 584  | 584  | 585  | 585  | 585  | 0.983033 | 368      | 410 | 312 | 344  | 467  | 307  | 326 | 368  | 423  | 344 | 369  | 0.94     | 0.130314 | 363  | 0.97     | 0.046594 |
| 251676_at | A13g57320 | hypothetical protein                                                                         | 277  | 326  | 381  | 356  | 388  | 322  | 328  | 355  | 0.92     | 0.484218 | 353 | 366 | 390  | 463  | 375  | 338 | 412  | 373  | 370 | 392  | 0.94     | 0.471554 | 392  | 0.94     | 0.593891 |
| 251649_at | A13g57330 | Ca2+-transferrin ATPase-like protein calcium-transferrin ATPase, plasma m                    | 190  | 168  | 185  | 216  | 212  | 183  | 181  | 204  | 0.89     | 0.141678 | 101 | 90  | 112  | 130  | 117  | 85  | 111  | 119  | 101 | 112  | 0.90     | 0.334745 | 111  | 0.91     | 0.545911 |
| 251650_at | A13g57360 | hypothetical protein                                                                         | 96   | 97   | 119  | 118  | 133  | 100  | 104  | 117  | 0.89     | 0.342322 | 116 | 103 | 115  | 133  | 119  | 112 | 113  | 111  | 112 | 117  | 0.95     | 0.369488 | 121  | 0.92     | 0.252274 |
| 251651_at | A13g57370 | putative protein transcription initiation factor IIB (TFIIB) family oro                      | 32   | 36   | 38   | 48   | 43   | 45   | 35   | 45   | 0.78     | 0.015727 | 24  | 33  | 35   | 36   | 36   | 29  | 53   | 35   | 31  | 38   | 0.82     | 0.239427 | 34   | 0.82     | 0.542591 |
| 251652_at | A13g57380 | putative protein hypothetical protein T2                                                     | 38   | 48   | 55   | 51   | 53   | 48   | 47   | 51   | 0.93     | 0.493046 | 23  | 29  | 25   | 39   | 27   | 21  | 35   | 32   | 26  | 31   | 0.85     | 0.317293 | 29   | 0.90     | 0.619630 |
| 251622_at | A13g57340 | dnaJ-like protein DNAJ protein - Schiz DNAJ heat shock N-terminal domain-co                  | 350  | 428  | 503  | 474  | 512  | 389  | 427  | 458  | 0.93     | 0.615313 | 438 | 449 | 444  | 582  | 523  | 484 | 468  | 482  | 443 | 508  | 0.87     | 0.058383 | 530  | 0.84     | 0.039265 |
| 251623_at | A13g57390 | MADS transcription factor-like protein - MADS-box protein (AGL18)                            | 432  | 468  | 497  | 429  | 543  | 363  | 466  | 445  | 1.05     | 0.728939 | 335 | 316 | 344  | 545  | 456  | 418 | 427  | 393  | 331 | 448  | 0.74     | 0.016754 | 473  | 0.70     | 0.021099 |
| 251624_at | A13g57280 | hypothetical protein - supported by full-length expressed protein                            | 340  | 377  | 407  | 434  | 477  | 426  | 375  | 445  | 0.84     | 0.048526 | 409 | 413 | 420  | 541  | 431  | 419 | 441  | 440  | 414 | 454  | 0.91     | 0.222842 | 463  | 0.89     | 0.275730 |
| 251625_at | A13g57290 | beta-1,3-glucanase 2 (BG2) (PR-2) - a glycosyl hydrolase family AGL17                        | 24   | 32   | 36   | 25   | 31   | 32   | 30   | 29   | 1.04     | 0.798751 | 29  | 28  | 30   | 25   | 22   | 25  | 30   | 27   | 29  | 26   | 1.13     | 0.017004 | 24   | 1.21     | 0.010061 |
| 251626_at | A13g57220 | UDP-GlcNAc:dolichol phosphate N-acio UDP-GlcNAc:dolichol phosphate N-acet                    | 208  | 220  | 225  | 268  | 286  | 234  | 218  | 263  | 0.83     | 0.049463 | 183 | 158 | 210  | 290  | 238  | 219 | 208  | 214  | 184 | 232  | 0.79     | 0.083792 | 246  | 0.75     | 0.088612 |
| 251627_at | A13g57270 | glucan endo-1,3-beta-D-glucanase-II glycosyl hydrolase family 17 protein                     | 48   | 62   | 59   | 49   | 54   | 45   | 56   | 49   | 1.14     | 0.236500 | 64  | 58  | 66   | 48   | 38   | 47  | 49   | 63   | 46  | 1.37 | 0.002040 | 44       | 1.41 | 0.010554 |          |
| 251628_at | A13g57290 | translational initiation factor 3 - like protein eukaryotic translation initiation factor 3E | 1002 | 1148 | 1172 | 1175 | 1170 | 954  | 1108 | 1100 | 1.01     | 0.933977 | 970 | 898 | 977  | 1261 | 1056 | 960 | 1106 | 1079 | 949 | 1062 | 0.87     | 0.071805 | 1092 | 0.87     | 0.149695 |
| 251629_at | A13g57410 | villin 3 fragment - supported by cDNA, villin 3 (VILN3)                                      | 108  | 131  | 147  | 111  | 143  | 89   | 129  | 114  | 1.12     | 0.510625 | 78  | 70  | 75   | 96   | 86   | 68  | 86   | 92   | 73  | 86   | 0.85     | 0.087838 | 83   | 0.87     | 0.257363 |
| 251630_at | A13g57420 | putative protein unknown protein - Arls expressed protein                                    | 127  | 165  | 151  | 167  | 168  | 130  | 148  | 155  | 0.96     | 0.700353 | 106 | 109 | 128  | 149  | 125  | 100 | 126  | 114  | 114 | 123  | 0.93     | 0.489024 | 125  | 0.91     | 0.534611 |
| 251631_at | A13g57430 | putative protein several hypothetical on pentatricopeptide (PPR) repeat-containi             | 37   | 45   | 52   | 45   | 58   | 47   | 45   | 50   | 0.89     | 0.426179 | 38  | 31  | 41   | 38   | 36   | 32  | 35   | 38   | 37  | 36   | 1.02     | 0.738380 | 35   | 1.04     | 0.707947 |
| 251632_at | A13g57440 | hypothetical protein                                                                         | 35   | 49   | 64   | 51   | 67   | 55   | 49   | 58   | 0.85     | 0.482848 | 37  | 34  | 39   | 38   | 35   | 39  | 46   | 43   | 37  | 40   | 0.91     | 0.271430 | 37   | 0.99     | 0.912252 |
| 251633_at | A13g57460 | putative protein metalloendopeptidase expressed protein                                      | 10   | 11   | 13   | 9    | 13   | 12   | 12   | 11   | 1.07     | 0.641072 | 7   | 14  | 11   | 12   | 8    | 7   | 8    | 10   | 11  | 9    | 1.20     | 0.336697 | 9    | 1.21     | 0.466558 |
| 251634_at | A13g57480 | putative protein putative zinc finger prc zinc finger (C2H2 type, AN1-like) family           | 93   | 137  | 131  | 136  | 131  | 114  | 120  | 127  | 0.95     | 0.693206 | 121 | 128 | 125  | 181  | 130  | 129 | 159  | 143  | 125 | 149  | 0.84     | 0.128357 | 147  | 0.85     | 0.277080 |
| 251635_at | A13g57510 | endo-polygalacturonase                                                                       | 85   | 97   | 100  | 112  | 129  | 127  | 94   | 123  | 0.76     | 0.014401 | 60  | 67  | 66   | 120  | 91   | 77  | 77   | 76   | 64  | 88   | 0.73     | 0.080719 | 96   | 0.67     | 0.068152 |
| 251636_at | A13g57530 | calcium-dependent protein kinase calc calcium-dependent protein kinase, outat                | 778  | 854  | 1082 | 1268 | 1355 | 971  | 905  | 1198 | 0.75     | 0.117757 | 534 | 443 | 432  | 667  | 525  | 482 | 739  | 693  | 470 | 621  | 0.76     | 0.075648 | 558  | 0.84     | 0.243564 |
| 251637_at | A13g57560 | hypothetical protein                                                                         | 111  | 135  | 154  | 149  | 176  | 121  | 133  | 149  | 0.90     | 0.482505 | 108 | 86  | 101  | 121  | 115  | 90  | 131  | 129  | 98  | 117  | 0.83     | 0.119191 | 109  | 0.90     | 0.381685 |
| 251638_at | A13g57490 | 40S ribosomal protein S2 homolog 40S ribosomal protein S2 (RP52D)                            | 313  | 344  | 363  | 392  | 472  | 331  | 341  | 398  | 0.87     | 0.247107 | 368 | 437 | 349  | 458  | 461  | 474 | 455  | 485  | 442 | 500  | 0.85     | 0.018214 | 474  | 0.80     | 0.046302 |
| 251639_at | A13g57560 | acetylglutamate kinase-like protein acet aspartate/glutamate/uridyate kinase far             | 297  | 386  | 429  | 491  | 562  | 446  | 371  | 500  | 0.74     | 0.066382 | 401 | 441 | 430  | 596  | 473  | 448 | 436  | 449  | 424 | 480  | 0.88     | 0.213024 | 506  | 0.84     | 0.159469 |
| 251640_at | A13g57450 | putative protein - supported by full-length expressed protein                                | 1083 | 1074 | 1581 | 1645 | 1741 | 1308 | 1246 | 1564 | 0.80     | 0.209182 | 627 | 742 | 606  | 911  | 673  | 741 | 854  | 668  | 658 | 809  | 0.81     | 0.063570 | 775  | 0.85     | 0.229842 |
| 251641_at | A13g57470 | protease-like protein INSULIN-DEGRADASE M16 family protein / insulinase                      | 119  | 167  | 166  | 181  | 200  | 141  | 151  | 174  | 0.87     | 0.372042 | 93  | 105 | 115  | 133  | 107  | 96  | 130  | 120  | 104 | 117  | 0.89     | 0.262700 | 112  | 0.93     | 0.575692 |
| 251642_at | A13g57520 | imibition protein homioic orotable in alkaline alpha galactosidase, putative                 | 738  | 1466 | 1721 | 1091 | 1768 | 738  | 1306 | 1263 | 1.04     | 0.916136 | 455 | 492 | 315  | 502  | 702  | 535 | 596  | 573  | 421 | 582  | 0.72     | 0.036507 | 590  | 0.73     | 0.124384 |
| 251643_at | A13g57550 | guanilate kinase-like protein guanilat guanilate kinase 2 (GK-2)                             | 482  | 579  | 586  | 696  | 676  | 560  | 549  | 644  | 0.85     | 0.153955 | 617 | 577 | 537  | 924  | 700  | 658 | 801  | 750  | 577 | 766  | 0.75     | 0.024803 | 760  | 0.76     | 0.099147 |
| 251644_at | A13g57540 | putative protein putative DNA bindin o reonin family protein                                 | 17   | 26   | 30   | 30   | 37   | 33   | 24   | 34   | 0.72     | 0.097630 | 14  | 13  | 20   | 29   | 20   | 21  | 24   | 23   | 16  | 24   | 0.67     | 0.026301 | 24   | 0.67     | 0.096209 |
| 251645_at | A13g57790 | putative protein polyvalcatalonase (EC glycoside hydrolase family 28 protein / p             | 175  | 252  | 246  | 219  | 250  | 176  | 224  | 215  | 1.04     | 0.785855 | 232 | 256 | 241  | 314  | 250  | 244 | 296  | 294  | 243 | 280  | 0.87     | 0.072126 | 269  | 0.90     | 0.332898 |
| 251646_at | A13g57780 | putative protein T2                                                                          | 25   | 23   | 27   | 34   | 37   | 29   | 25   | 33   | 0.76     | 0.036613 | 18  | 20  | 25   | 23   | 17   | 22  | 20   | 24   | 21  | 21   | 1.01     | 0.235441 | 21   | 0.92     | 0.104777 |
| 251647_at | A13g57770 | protein kinase - like protein wall-asso protein kinase, putative                             | 11   | 15   | 16   | 13   | 15   | 13   | 14   | 14   | 1.01     | 0.953278 | 16  | 19  | 16   | 14   | 12   | 11  | 17   | 10   | 17  | 13   | 1.32     | 0.067327 | 12   | 1.38     | 0.041458 |
| 251648_at | A13g57720 | protein kinase - like protein S-receptor protein kinase, putative                            | 36   | 38   | 43   | 48   | 49   | 41   | 39   | 46   | 0.85     | 0.015566 | 28  | 23  | 32   | 34   | 30   | 31  | 34   | 29   | 28  | 31   | 0.88     | 0.172646 | 31   | 0.88     | 0.287217 |
| 251621_at | A13g57700 | protein kinase - like protein wall-asso protein kinase, putative                             | 21   | 22   | 20   | 22   | 23   | 21   | 21   | 22   | 0.95     | 0.278560 | 28  | 28  | 28   | 25   | 26   | 24  | 31   | 25   | 28  | 26   | 1.06     | 0.427946 | 25   | 1.11     | 0.022515 |
| 251598_at | A13g57690 | carboxyl-terminal proteinase - like protein peptidase S41 family protein                     | 207  | 200  | 266  | 285  | 511  | 145  | 588  | 314  | 1.87     | 0.093336 | 240 | 295 | 245  | 440  | 129  | 81  | 84   | 83   | 261 | 125  | 0.91     | 0.016218 | 84   | 152      | 0.026258 |
| 251591_at | A13g57680 | zinc finger - like protein protein zinc finger (C2H2 type) protein (WIF2)                    | 102  | 148  | 143  | 108  | 94   | 71   | 51   | 91   | 0.56     | 0.074111 | 96  | 37  | 40   | 87   | 67   | 67  | 62   | 62   | 38  | 70   | 0.54     | 0.002005 | 74   | 0.51     | 0.007453 |
| 251592_at | A13g57660 | DNA-directed RNA polymerase 1 190K DNA-directed RNA polymerase family p                      | 165  | 196  | 189  | 216  | 217  | 200  | 183  | 211  | 0.87     | 0.062357 | 108 | 98  | 139  | 144  | 130  | 108 | 138  | 136  | 115 | 131  | 0.88     | 0.235198 | 127  | 0.90     | 0.491181 |
| 251594_at | A13g57630 | putative protein DCCA, Mus musculus, exostosin family protein                                | 168  | 201  | 237  | 189  | 226  | 169  | 202  | 195  | 1.04     | 0.787050 | 150 | 151 | 182  | 200  | 154  | 151 | 183  | 162  | 161 | 170  | 0.95     | 0.562613 | 169  | 0.96     | 0.719146 |
| 251595_at | A13g57620 | putative protein valactose oxidase ore glycolic oxidase-related                              | 168  | 201  | 237  | 189  | 226  | 169  | 202  | 195  | 1.04     | 0.787050 | 150 | 151 | 182  | 200  | 154  | 151 | 183  | 162  | 161 | 170  | 0.95     | 0.562613 | 169  | 0.96     | 0.719146 |
| 251596_at | A13g57650 | 1-acylcrocer-3-phosphatase acyltransferase: acyl-CoA:1-acylcrocer-3-phosphatase ac           | 719  | 822  | 849  | 982  | 1054 | 890  | 796  | 975  | 0.82     | 0.044415 | 983 | 905 | 1034 | 1275 | 1093 | 915 | 1006 | 906  | 974 | 1039 | 0.94     | 0.517520 | 1094 | 0.89     | 0.336662 |
| 251597_at | A13g57750 | protein kinase - like protein wall-asso protein kinase, putative                             | 50   | 62   | 74   | 68   | 61   | 62   | 64   | 67   | 0.92     | 0.827263 | 63  | 70  | 76</ |      |      |     |      |      |     |      |          |          |      |          |          |

|           |           |                                                                                     |      |      |      |      |      |      |      |      |          |          |      |      |      |      |      |      |      |      |      |      |          |          |      |          |          |
|-----------|-----------|-------------------------------------------------------------------------------------|------|------|------|------|------|------|------|------|----------|----------|------|------|------|------|------|------|------|------|------|------|----------|----------|------|----------|----------|
| 251580_at | A13g58450 | putative protein ethylene-responsive p universal stress protein (USP) family prc    | 30   | 37   | 55   | 352  | 47   | 42   | 41   | 147  | 0.28     | 0.306690 | 32   | 34   | 36   | 27   | 25   | 27   | 33   | 31   | 34   | 28   | 1.21     | 0.028991 | 26   | 1.30     | 0.004416 |
| 251581_at | A13g58560 | putative protein CARBON CATABOLIT endonuclease/exonuclease/phosphatase              | 461  | 591  | 613  | 761  | 777  | 658  | 555  | 732  | 0.76     | 0.042730 | 502  | 419  | 528  | 710  | 603  | 486  | 581  | 541  | 483  | 584  | 0.83     | 0.115324 | 600  | 0.81     | 0.182519 |
| 251582_at | A13g58580 | putative protein CARBON CATABOLIT endonuclease/exonuclease/phosphatase              | 221  | 251  | 248  | 291  | 317  | 252  | 240  | 287  | 0.84     | 0.009992 | 163  | 124  | 173  | 200  | 191  | 155  | 175  | 168  | 154  | 177  | 0.87     | 0.178212 | 182  | 0.85     | 0.239053 |
| 251583_at | A13g58590 | putative protein several hypothetical on pentose phosphate (PPP) repeat-contains    | 44   | 52   | 48   | 3    | 57   | 56   | 67   | 0.77 | 0.001688 | 43       | 45   | 47   | 43   | 47   | 48   | 42   | 60   | 48   | 42   | 45   | 0.77     | 0.154648 | 46   | 0.77     | 0.062056 |
| 251584_at | A13g58620 | putative protein A2042580 - Arabidopsis tetraaricopeptide repeat (TPR)-containing   | 372  | 313  | 328  | 249  | 353  | 197  | 338  | 267  | 1.27     | 0.229272 | 448  | 509  | 396  | 419  | 354  | 288  | 438  | 410  | 451  | 382  | 1.18     | 0.164686 | 354  | 1.27     | 0.125513 |
| 251585_at | A13g58630 | putative protein hypothetical protein F1 expressed protein                          | 91   | 98   | 109  | 116  | 131  | 103  | 99   | 117  | 0.85     | 0.137511 | 84   | 108  | 109  | 145  | 107  | 99   | 109  | 109  | 109  | 114  | 0.88     | 0.307916 | 117  | 0.85     | 0.357576 |
| 251526_at | A13g58640 | putative protein several serine/threonine protein kinase family protein             | 205  | 279  | 362  | 316  | 342  | 252  | 282  | 303  | 0.83     | 0.709610 | 223  | 206  | 254  | 307  | 235  | 224  | 321  | 328  | 227  | 283  | 0.80     | 0.124903 | 256  | 0.89     | 0.395745 |
| 251527_at | A13g58650 | putative protein hypothetical protein expressed protein                             | 127  | 132  | 130  | 128  | 139  | 120  | 114  | 122  | 0.93     | 0.603933 | 90   | 114  | 123  | 113  | 92   | 82   | 74   | 88   | 88   | 93   | 0.99     | 0.303931 | 86   | 0.98     | 0.478105 |
| 251528_at | A13g58660 | putative protein hypothetical protein F2 expressed protein                          | 304  | 316  | 365  | 382  | 442  | 374  | 329  | 399  | 0.82     | 0.067932 | 291  | 309  | 307  | 438  | 308  | 304  | 334  | 335  | 302  | 344  | 0.88     | 0.252542 | 350  | 0.86     | 0.341937 |
| 251529_at | A13g58700 | ATP-dependent RNA helicase-like pro DEAD box RNA helicase, putative                 | 045  | 1097 | 1327 | 1348 | 1616 | 1221 | 1123 | 1395 | 0.80     | 0.165863 | 677  | 616  | 675  | 848  | 764  | 680  | 856  | 821  | 656  | 794  | 0.83     | 0.024306 | 764  | 0.86     | 0.109158 |
| 251530_at | A13g58520 | putative protein several hypothetical on expressed protein                          | 736  | 81   | 95   | 102  | 112  | 90   | 83   | 101  | 0.82     | 0.105911 | 74   | 66   | 71   | 97   | 86   | 77   | 81   | 82   | 70   | 85   | 0.83     | 0.023568 | 87   | 0.81     | 0.056436 |
| 251531_at | A13g58550 | putative protein hypothetical protein F1 protease inhibitor/seed storage/old tran   | 24   | 24   | 31   | 26   | 28   | 27   | 26   | 1.05 | 0.031968 | 21       | 22   | 24   | 17   | 21   | 23   | 22   | 27   | 21   | 23   | 23   | 1.07     | 0.339170 | 20   | 1.14     | 0.114822 |
| 251532_at | A13g58530 | putative protein F-box protein F1B2 - H-F-box family protein-related                | 138  | 170  | 192  | 166  | 175  | 142  | 166  | 161  | 1.03     | 0.811967 | 150  | 133  | 153  | 104  | 154  | 156  | 211  | 206  | 145  | 194  | 0.79     | 0.061065 | 168  | 0.86     | 0.185599 |
| 251533_at | A13g58460 | putative protein several hypothetical on rhomboid family protein / ubiquitin-assoc  | 219  | 283  | 298  | 344  | 368  | 307  | 267  | 340  | 0.78     | 0.071715 | 301  | 353  | 336  | 473  | 376  | 354  | 375  | 383  | 330  | 392  | 0.84     | 0.082395 | 401  | 0.82     | 0.147382 |
| 251534_at | A13g58510 | ATP-dependent RNA helicase-like pro DEAD box RNA helicase, putative (RH1            | 389  | 433  | 463  | 559  | 609  | 504  | 428  | 558  | 0.77     | 0.025269 | 402  | 348  | 404  | 531  | 473  | 418  | 514  | 474  | 385  | 482  | 0.80     | 0.016418 | 474  | 0.81     | 0.076372 |
| 251535_at | A13g58540 | hypothetical protein - supported by full- expressed protein                         | 36   | 36   | 49   | 43   | 36   | 31   | 40   | 36   | 1.10     | 0.528544 | 36   | 34   | 34   | 32   | 28   | 26   | 29   | 25   | 35   | 28   | 1.24     | 0.005007 | 29   | 1.21     | 0.027191 |
| 251536_at | A13g58610 | ketol-acid reductoisomerase - sucrose ketol-acid reductoisomerase                   | 1996 | 1816 | 2127 | 1222 | 1904 | 1834 | 2051 | 0.89 | 0.121928 | 2080     | 1878 | 2170 | 2461 | 2250 | 1830 | 2337 | 2268 | 2043 | 2233 | 0.91 | 0.273718 | 2167     | 0.93 | 0.528923 |          |
| 251537_at | A13g58470 | putative protein several hypothetical on expressed protein                          | 207  | 271  | 270  | 262  | 287  | 236  | 249  | 261  | 0.95     | 0.663158 | 291  | 373  | 344  | 441  | 371  | 323  | 314  | 321  | 336  | 354  | 0.95     | 0.645918 | 378  | 0.89     | 0.374006 |
| 251538_at | A13g58660 | putative protein PBK1 protein. Homo s 60S ribosomal protein-related                 | 248  | 223  | 281  | 322  | 325  | 296  | 251  | 314  | 0.80     | 0.028398 | 163  | 161  | 217  | 248  | 167  | 164  | 192  | 199  | 180  | 194  | 0.93     | 0.585703 | 193  | 0.93     | 0.712786 |
| 251539_at | A13g58690 | serine/threonine-specific protein kinase family protein                             | 220  | 256  | 278  | 311  | 371  | 270  | 251  | 318  | 0.79     | 0.120311 | 269  | 207  | 262  | 378  | 327  | 294  | 312  | 319  | 246  | 326  | 0.75     | 0.015037 | 333  | 0.74     | 0.050603 |
| 251540_at | A13g58740 | citrate synthase -like protein citrate sy citrate synthase, glyoxysomal, putative   | 46   | 41   | 72   | 70   | 69   | 65   | 53   | 68   | 0.78     | 0.109121 | 29   | 35   | 43   | 39   | 35   | 32   | 45   | 38   | 36   | 38   | 0.94     | 0.618065 | 35   | 1.01     | 0.957346 |
| 251541_at | A13g58750 | citrate synthase -like protein citrate sy citrate synthase, glyoxysomal, putative   | 321  | 446  | 443  | 387  | 468  | 325  | 403  | 393  | 1.03     | 0.867244 | 428  | 407  | 356  | 414  | 388  | 347  | 410  | 392  | 397  | 390  | 1.02     | 0.773328 | 383  | 1.04     | 0.651177 |
| 251542_at | A13g58760 | putative protein threonine kinase family protein kinase, putative                   | 67   | 91   | 75   | 85   | 91   | 82   | 77   | 86   | 0.90     | 0.323748 | 73   | 83   | 85   | 109  | 84   | 79   | 88   | 77   | 80   | 87   | 0.92     | 0.411320 | 91   | 0.89     | 0.352859 |
| 251543_at | A13g58770 | putative protein general stress protein - expressed protein                         | 43   | 52   | 54   | 82   | 80   | 75   | 50   | 79   | 0.63     | 0.001953 | 32   | 37   | 43   | 45   | 32   | 40   | 44   | 44   | 37   | 41   | 0.91     | 0.387840 | 39   | 0.96     | 0.742012 |
| 251544_at | A13g58790 | putative protein general stress protein - glycosyl transferase family 8 protein     | 115  | 30   | 113  | 144  | 143  | 130  | 106  | 139  | 0.76     | 0.022224 | 101  | 90   | 102  | 99   | 95   | 80   | 112  | 101  | 98   | 97   | 1.00     | 0.952059 | 91   | 1.07     | 0.401936 |
| 251545_at | A13g58810 | zinc transporter -like protein zinc trans zinc transporter, putative                | 86   | 116  | 119  | 126  | 140  | 96   | 107  | 120  | 0.89     | 0.468058 | 102  | 80   | 96   | 146  | 104  | 90   | 120  | 121  | 93   | 116  | 0.80     | 0.133824 | 113  | 0.82     | 0.323465 |
| 251546_at | A13g58830 | putative protein predicted proteins, yes haloacid dehalogenase (HAD) superfam       | 117  | 154  | 177  | 174  | 188  | 150  | 172  | 0.87 | 0.334361 | 129      | 147  | 143  | 219  | 147  | 148  | 147  | 149  | 140  | 162  | 0.86 | 0.289902 | 171      | 0.81 | 0.263211 |          |
| 251547_at | A13g58860 | putative protein predicted proteins. Arx F-box family protein                       | 30   | 28   | 31   | 30   | 36   | 28   | 30   | 31   | 0.95     | 0.528453 | 29   | 27   | 28   | 25   | 24   | 30   | 24   | 28   | 28   | 26   | 1.08     | 0.246901 | 26   | 1.06     | 0.394978 |
| 251548_at | A13g58870 | putative protein predicted proteins. Arat expressed protein                         | 37   | 48   | 56   | 61   | 50   | 46   | 47   | 52   | 0.89     | 0.459866 | 46   | 56   | 61   | 53   | 46   | 39   | 48   | 44   | 54   | 46   | 1.18     | 0.107052 | 46   | 1.18     | 0.234598 |
| 251549_at | A13g58890 | putative protein predicted proteins. Arx F-box family protein                       | 37   | 48   | 56   | 61   | 50   | 46   | 47   | 52   | 0.89     | 0.459866 | 46   | 56   | 61   | 53   | 46   | 39   | 48   | 44   | 54   | 46   | 1.18     | 0.107052 | 46   | 1.18     | 0.234598 |
| 251550_at | A13g58800 | putative protein proline-rich protein A4 - expressed protein                        | 111  | 138  | 125  | 162  | 171  | 134  | 125  | 156  | 0.80     | 0.085510 | 127  | 121  | 141  | 175  | 147  | 138  | 126  | 127  | 130  | 142  | 0.91     | 0.369396 | 153  | 0.85     | 0.139034 |
| 251551_at | A13g58880 | transcriptional coactivator - like protein ethylene-responsive transcriptional coac | 1033 | 1105 | 1189 | 1086 | 1323 | 971  | 1042 | 1127 | 0.92     | 0.600716 | 1327 | 1661 | 1425 | 1743 | 1455 | 1516 | 1483 | 1485 | 1471 | 1536 | 0.96     | 0.542623 | 1571 | 0.94     | 0.492693 |
| 251552_at | A13g58700 | ribosomal protein L11 -like ribosomal s 60S ribosomal protein L11 (RPL11A) //       | 811  | 1249 | 1281 | 1229 | 1376 | 1124 | 1180 | 1243 | 0.95     | 0.060787 | 1209 | 1262 | 1364 | 1705 | 1408 | 1327 | 1424 | 1380 | 1279 | 1449 | 0.88     | 0.120191 | 1480 | 0.86     | 0.177799 |
| 251553_at | A13g58710 | DNA-binding WRKY -like protein AR4 WRKY family transcription factor                 | 67   | 63   | 92   | 83   | 96   | 78   | 81   | 86   | 0.93     | 0.559682 | 86   | 96   | 85   | 108  | 85   | 85   | 123  | 112  | 89   | 102  | 0.87     | 0.262977 | 92   | 0.97     | 0.739179 |
| 251554_at | A13g58670 | putative protein predicted proteins. Arat expressed protein                         | 96   | 140  | 143  | 125  | 147  | 109  | 126  | 127  | 1.00     | 0.974789 | 115  | 118  | 132  | 165  | 139  | 133  | 109  | 112  | 122  | 132  | 0.92     | 0.505813 | 146  | 0.84     | 0.099694 |
| 251555_at | A13g58780 | shatterproof 1 (SHP1) aaomous -like protein AG1-like MAD5 box protein AG1.1         | 1012 | 1296 | 1361 | 947  | 1392 | 905  | 1223 | 1081 | 1.13     | 0.494380 | 1410 | 1466 | 1278 | 1048 | 916  | 904  | 863  | 879  | 1385 | 922  | 1.50     | 0.00231  | 955  | 1.45     | 0.003919 |
| 251556_at | A13g58840 | putative protein predicted proteins. Me expressed protein                           | 269  | 317  | 332  | 403  | 444  | 366  | 306  | 405  | 0.76     | 0.028745 | 264  | 237  | 296  | 368  | 350  | 304  | 372  | 370  | 266  | 359  | 0.74     | 0.087177 | 350  | 0.76     | 0.057051 |
| 251557_at | A13g58730 | v-ATPase subunit D (vATPD) vacuolar ATP synthase subunit D (VATC                    | 530  | 429  | 708  | 741  | 589  | 494  | 670  | 0.73 | 0.033043 | 443      | 457  | 505  | 765  | 589  | 540  | 539  | 456  | 539  | 456  | 539  | 0.79     | 0.076022 | 637  | 0.76     | 0.073439 |
| 251522_at | A13g58980 | putative protein several hypothetical on expressed protein // F-box family protein  | 66   | 90   | 94   | 99   | 109  | 93   | 83   | 100  | 0.83     | 0.163541 | 80   | 82   | 87   | 118  | 88   | 82   | 108  | 97   | 83   | 98   | 0.84     | 0.128905 | 96   | 0.86     | 0.314139 |
| 251524_at | A13g58990 | 3-isocrovalinate dehydratase-like orc acornase C-terminal domain-contains           | 34   | 37   | 40   | 43   | 43   | 45   | 37   | 44   | 0.84     | 0.019492 | 36   | 38   | 47   | 36   | 32   | 31   | 73   | 34   | 40   | 41   | 0.98     | 0.931725 | 33   | 1.22     | 0.119402 |
| 251525_at | A13g59000 | putative protein several hypothetical on F-box family protein                       | 155  | 193  | 254  | 244  | 264  | 190  | 201  | 233  | 0.86     | 0.434861 | 150  | 146  | 158  | 190  | 156  | 165  | 201  | 180  | 151  | 178  | 0.85     | 0.052955 | 170  | 0.89     | 0.155380 |
| 251495_at | A13g59020 | putative protein RanBP7/fimortin 7 - H-importin beta-2 subunit family protein       | 223  | 257  | 272  | 247  | 289  | 231  | 251  | 265  | 0.98     | 0.834309 | 184  | 241  | 173  | 162  | 185  | 247  | 188  | 170  | 167  | 171  | 0.98     | 0.794573 | 171  | 0.98     | 0.632184 |
| 251496_at | A13g59040 | putative protein csp1 protein, involved pentatricopeptide (PTP) repeat-contains     | 198  | 330  | 344  | 286  | 338  | 218  | 281  | 281  | 1.00     | 0.998800 | 183  | 164  | 173  | 262  | 193  | 197  | 221  | 173  | 222  | 197  | 0.78     | 0.031586 | 209  | 0.83     | 0.075763 |
| 251497_at | A13g59060 | putative protein phytochrome-associated basic helix-loop-helix (bHLH) family prot   | 23   | 31   | 28   | 25   | 30   | 27   | 27   | 27   | 1.00     | 0.983790 | 28   | 36   | 23   | 26   | 21   | 23   | 21   | 25   | 29   | 25   | 1.16     | 0.312651 | 27   | 1.06     | 0.229660 |
| 251498_at | A13g59070 | putative protein hypothetical proteins, - auxin-responsive protein, putative        | 21   | 23   | 16   | 20   | 16   | 21   | 20   | 19   | 1.06     | 0.683087 | 21   | 17   | 23   | 21   | 13   | 13   | 17   | 14   | 20   | 16   | 1.29     | 0.113632 | 16   | 1.28     | 0.247901 |
| 251500_at | A13g59100 | putative protein autophagy callose synthase glucosyl transferase family 48 protein  | 120  | 166  | 154  | 209  | 221  | 205  | 147  | 212  | 0.69     | 0.011059 | 173  | 149  | 175  | 197  | 163  | 148  | 194  | 197  | 166  | 180  | 0.92     | 0.386064 | 169  | 0.98     | 0.849091 |
| 251501_at | A13g59110 | receptor-like protein kinase receptor-like protein kinase family protein            | 212  | 265  | 268  | 537  | 579  | 432  | 551  | 0.97 | 0.846350 | 438      | 514  | 461  | 454  | 494  | 486  | 494  | 486  | 494  | 486  | 494  | 0.86     | 0.239460 | 458  | 0.85     |          |

|             |            |                                                                                         |      |      |      |      |          |      |      |          |          |          |      |      |      |      |      |      |      |      |          |          |          |          |           |          |          |          |
|-------------|------------|-----------------------------------------------------------------------------------------|------|------|------|------|----------|------|------|----------|----------|----------|------|------|------|------|------|------|------|------|----------|----------|----------|----------|-----------|----------|----------|----------|
| 251486_at   | A13g595450 | 60S RIBOSOMAL PROTEIN L38-like; 60S ribosomal protein L38 (RPL38B)                      | 2283 | 2617 | 2761 | 2674 | 2974     | 2430 | 2554 | 2693     | 0.95     | 0.546620 | 2127 | 2259 | 2406 | 2789 | 2601 | 2285 | 2370 | 2377 | 2264     | 2484     | 0.91     | 0.157785 | 2558      | 0.89     | 0.154417 |          |
| 251487_at   | A13g59760  | cysteine synthase                                                                       | 2484 | 298  | 313  | 422  | 465      | 385  | 285  | 424      | 0.67     | 0.011156 | 270  | 257  | 286  | 484  | 357  | 349  | 376  | 387  | 271      | 391      | 0.69     | 0.010931 | 397       | 0.68     | 0.047524 |          |
| 251489_at   | A13g59770  | sac1 homologous domain-containing protein                                               | 175  | 236  | 264  | 254  | 283      | 197  | 225  | 245      | 0.92     | 0.818378 | 140  | 144  | 159  | 198  | 183  | 142  | 180  | 165  | 148      | 173      | 0.85     | 0.098448 | 174       | 0.85     | 0.203467 |          |
| 251481_at   | A13g59780  | putative protein                                                                        | 69   | 107  | 107  | 107  | 92       | 84   | 102  | 89       | 0.87     | 0.024617 | 90   | 87   | 90   | 79   | 133  | 106  | 79   | 133  | 106      | 79       | 0.82     | 0.147023 | 101       | 0.82     | 0.056907 |          |
| 251462_at   | A13g59790  | mitochondrial protein kinase-like; a mitocoe-activated protein kinase, putative         | 49   | 47   | 53   | 44   | 49       | 46   | 50   | 46       | 1.07     | 0.183188 | 55   | 48   | 57   | 48   | 50   | 56   | 59   | 53   | 52       | 56       | 1.02     | 0.783753 | 49        | 1.09     | 0.171622 |          |
| 251463_at   | A13g59800  | putative protein                                                                        | 168  | 205  | 204  | 222  | 249      | 204  | 212  | 225      | 0.85     | 0.137835 | 237  | 247  | 255  | 361  | 285  | 235  | 285  | 282  | 257      | 246      | 284      | 0.87     | 0.238138  | 294      | 0.84     | 0.268887 |
| 251432_at   | A13g59820  | putative protein leucine zipper-EF-hand class-binding mitochondrial protein-re          | 237  | 271  | 326  | 325  | 388      | 317  | 278  | 343      | 0.81     | 0.129506 | 264  | 219  | 307  | 299  | 289  | 238  | 253  | 246  | 263      | 265      | 0.99     | 0.943034 | 275       | 0.96     | 0.720091 |          |
| 251433_at   | A13g59830  | putative protein SERINE/THREONINE kinase, putative                                      | 22   | 23   | 23   | 26   | 23       | 29   | 23   | 29       | 0.38     | 0.00816  | 16   | 14   | 16   | 14   | 16   | 16   | 16   | 16   | 16       | 14       | 1.01     | 0.231785 | 16        | 1.01     | 0.154181 |          |
| 251434_at   | A13g59850  | polysaccharuronase-like protein polysaccharide polysaccharuronase, putative / cectinase | 18   | 27   | 21   | 50   | 64       | 23   | 22   | 45       | 0.48     | 0.124443 | 21   | 21   | 22   | 27   | 25   | 23   | 19   | 22   | 21       | 23       | 0.93     | 0.377553 | 25        | 0.86     | 0.041753 |          |
| 251435_at   | A13g59860  | putative protein hvoothelial proteins - , Mutator-like transposase family // hvoot      | 1    | 3    | 2    | 1    | 2        | 2    | 1    | 1        | 1.27     | 0.551471 | 3    | 6    | 1    | 3    | 3    | 4    | 9    | 3    | 3        | 5        | 0.75     | 0.586051 | 4         | 0.95     | 0.919044 |          |
| 251436_at   | A13g59900  | putative protein hvoothelial protein At expressed protein                               | 41   | 45   | 58   | 50   | 57       | 52   | 48   | 53       | 0.91     | 0.454393 | 108  | 107  | 141  | 71   | 62   | 49   | 105  | 92   | 119      | 76       | 1.57     | 0.034209 | 61        | 1.95     | 0.011266 |          |
| 251437_at   | A13g59910  | putative protein hvoothelial protein At expressed protein                               | 166  | 229  | 198  | 217  | 267      | 188  | 197  | 227      | 0.87     | 0.336915 | 119  | 87   | 112  | 115  | 114  | 96   | 117  | 110  | 106      | 111      | 1.06     | 0.680007 | 108       | 0.98     | 0.835299 |          |
| 251438_s_at | A13g59930  | putative protein hvoothelial protein F1 expressed protein                               | 24   | 27   | 35   | 27   | 35       | 35   | 29   | 39       | 0.74     | 0.094545 | 18   | 14   | 26   | 19   | 20   | 17   | 22   | 20   | 21       | 0.93     | 0.693027 | 19       | 1.06      | 0.772776 |          |          |
| 251439_at   | A13g59950  | putative protein unknown protein At20z-autophagy 4b (APG4b)                             | 157  | 212  | 195  | 196  | 233      | 180  | 188  | 203      | 0.93     | 0.544175 | 208  | 190  | 198  | 254  | 217  | 198  | 218  | 215  | 199      | 219      | 0.91     | 0.219661 | 220       | 0.90     | 0.344182 |          |
| 251440_at   | A13g60010  | SKP1/ASK1 (A113), putative similar to E3 ubiquitin ligase SCF complex subunit           | 38   | 34   | 39   | 35   | 37       | 37   | 101  | 0.886835 | 38       | 47       | 39   | 27   | 30   | 21   | 29   | 25   | 42   | 26   | 1.58     | 0.001665 | 26       | 1.59     | 0.0013114 |          |          |          |
| 251441_at   | A13g60020  | SKP1/ASK1 (A15), putative similar to S E3 ubiquitin ligase SCF complex subunit          | 23   | 23   | 21   | 26   | 25       | 20   | 22   | 24       | 0.94     | 0.533216 | 10   | 17   | 18   | 16   | 13   | 12   | 13   | 15   | 14       | 1.06     | 0.735468 | 15       | 0.98      | 0.902142 |          |          |
| 251442_at   | A13g60080  | putative protein hvoothelial protein F1 expressed protein                               | 179  | 260  | 253  | 248  | 263      | 211  | 237  | 241      | 0.99     | 0.929532 | 212  | 286  | 225  | 318  | 243  | 239  | 283  | 272  | 241      | 271      | 0.89     | 0.286992 | 267       | 0.90     | 0.505043 |          |
| 251443_at   | A13g59940  | putative protein unknown protein At20z-autophagy 4b (APG4b)                             | 57   | 183  | 161  | 92   | 75       | 59   | 134  | 75       | 1.78     | 0.216036 | 101  | 137  | 73   | 122  | 105  | 109  | 160  | 141  | 104      | 128      | 0.81     | 0.261076 | 112       | 0.93     | 0.683731 |          |
| 251444_at   | A13g59990  | putative protein ETHIONINE AMINOPEPTIDYL METHIONYL AMINOPEPTIDASE, putative / me        | 557  | 698  | 761  | 815  | 880      | 723  | 672  | 806      | 0.83     | 0.151535 | 638  | 722  | 704  | 1017 | 763  | 725  | 761  | 801  | 688      | 813      | 0.85     | 0.132437 | 835       | 0.82     | 0.196518 |          |
| 251445_at   | A13g59870  | putative protein hvoothelial protein F1 expressed protein                               | 65   | 106  | 92   | 112  | 122      | 92   | 88   | 109      | 0.81     | 0.231223 | 80   | 87   | 85   | 127  | 101  | 100  | 115  | 99   | 84       | 108      | 0.78     | 0.016411 | 109       | 0.77     | 0.049120 |          |
| 251446_at   | A13g59840  | Expressed protein - , supported by full-length expressed protein                        | 595  | 704  | 636  | 802  | 910      | 791  | 645  | 534      | 0.77     | 0.016773 | 666  | 746  | 762  | 1145 | 886  | 817  | 840  | 814  | 725      | 900      | 0.80     | 0.087141 | 949       | 0.76     | 0.096937 |          |
| 251447_at   | A13g59810  | U6 snRNA-associated Sm-like protein - small nuclear ribonucleoprotein F, putative       | 290  | 361  | 365  | 469  | 478      | 409  | 339  | 452      | 0.75     | 0.025525 | 314  | 337  | 368  | 578  | 455  | 414  | 397  | 379  | 340      | 445      | 0.76     | 0.075224 | 483       | 0.70     | 0.050326 |          |
| 251448_at   | A13g59845  | alcohol dehydrogenase-like protein NADP-dependent oxidoreductase, putative              | 74   | 86   | 94   | 171  | 137      | 120  | 85   | 143      | 0.59     | 0.022618 | 71   | 66   | 93   | 124  | 98   | 96   | 111  | 89   | 77       | 104      | 0.74     | 0.042377 | 106       | 0.72     | 0.079611 |          |
| 251449_at   | A13g59920  | Rab GDP dissociation inhibitor - , succo Rab GDP dissociation inhibitor (GDJ2)          | 1322 | 1514 | 1414 | 1714 | 1894     | 1599 | 1417 | 1736     | 0.82     | 0.035665 | 1375 | 1234 | 1483 | 1911 | 1658 | 1392 | 1644 | 1608 | 1364     | 1642     | 0.83     | 0.062360 | 1654      | 0.82     | 0.195161 |          |
| 251450_at   | A13g60030  | squamous promoter binding protein-like squamous promoter-binding protein-like           | 518  | 467  | 552  | 634  | 410      | 438  | 532  | 0.82     | 0.338176 | 376      | 340  | 369  | 634  | 543  | 485  | 573  | 553  | 364  | 558      | 558      | 0.65     | 0.001035 | 554       | 0.66     | 0.012690 |          |
| 251451_s_at | A13g60040  | putative protein several hypothetical protein F-box family protein // pentanucleotide   | 52   | 72   | 83   | 82   | 100      | 73   | 69   | 85       | 0.81     | 0.254637 | 63   | 62   | 64   | 92   | 70   | 65   | 75   | 66   | 63       | 74       | 0.86     | 0.160117 | 76        | 0.83     | 0.209574 |          |
| 251452_at   | A13g60060  | putative protein male sterility protein 2 Hypothesized                                  | 16   | 21   | 26   | 24   | 24       | 25   | 21   | 24       | 0.87     | 0.324804 | 16   | 21   | 18   | 19   | 20   | 14   | 18   | 17   | 18       | 18       | 1.04     | 0.694768 | 18        | 1.04     | 0.772989 |          |
| 251453_at   | A13g60070  | putative protein hvoothelial protein At lactose permease-related                        | 148  | 227  | 218  | 278  | 347      | 231  | 198  | 285      | 0.69     | 0.103402 | 136  | 150  | 194  | 242  | 193  | 198  | 200  | 188  | 160      | 205      | 0.78     | 0.048607 | 211       | 0.76     | 0.092012 |          |
| 251454_at   | A13g60080  | putative protein COP1-interacting prot zinc finger (C3HC4-type RING finger) fa          | 64   | 91   | 98   | 119  | 113      | 101  | 85   | 111      | 0.76     | 0.084419 | 73   | 75   | 79   | 103  | 83   | 78   | 71   | 72   | 76       | 81       | 0.93     | 0.487193 | 88        | 0.86     | 0.192636 |          |
| 251455_at   | A13g60100  | putative protein hvoothelial protein citrate synthase, mitochondrial, putative          | 42   | 45   | 45   | 45   | 42       | 45   | 45   | 45       | 0.83     | 0.024545 | 38   | 40   | 42   | 43   | 40   | 42   | 43   | 43   | 35       | 42       | 0.84     | 0.473333 | 43        | 0.84     | 0.405548 |          |
| 251456_at   | A13g60120  | beta-glucosidase-like protein several beta-glucosyl hydrolase family 1 protein          | 26   | 20   | 29   | 26   | 28       | 25   | 27   | 0.93     | 0.529543 | 14       | 14   | 20   | 17   | 19   | 16   | 19   | 21   | 16   | 18       | 0.89     | 0.332993 | 17       | 0.95      | 0.713802 |          |          |
| 251457_s_at | A13g60160  | multi resistance protein homolog multi ABC transporter family protein                   | 331  | 435  | 404  | 515  | 532      | 382  | 390  | 476      | 0.82     | 0.202039 | 261  | 225  | 264  | 462  | 385  | 341  | 440  | 461  | 250      | 418      | 0.60     | 0.002277 | 396       | 0.63     | 0.019718 |          |
| 251458_at   | A13g60170  | putative protein several retrotransposon copia-like retrotransposon family              | 31   | 42   | 47   | 39   | 56       | 36   | 40   | 44       | 0.91     | 0.643185 | 30   | 28   | 23   | 27   | 25   | 23   | 28   | 26   | 27       | 26       | 1.04     | 0.582913 | 25        | 1.07     | 0.497472 |          |
| 251459_at   | A13g60200  | putative protein hvoothelial proteins A expressed protein                               | 45   | 67   | 71   | 70   | 66       | 59   | 61   | 61       | 0.81     | 0.134864 | 70   | 79   | 74   | 86   | 64   | 62   | 80   | 83   | 74       | 75       | 0.99     | 0.523422 | 71        | 1.05     | 0.673288 |          |
| 251425_at   | A13g60210  | putative protein chloroplast Con21 iron chloroplast chaperonin 10, putative             | 383  | 492  | 470  | 435  | 518      | 393  | 433  | 449      | 0.96     | 0.807068 | 445  | 489  | 460  | 578  | 451  | 417  | 464  | 431  | 465      | 468      | 0.99     | 0.933027 | 482       | 0.96     | 0.751491 |          |
| 251426_at   | A13g60180  | URIDYLATE KINASE-like protein URID uridylic kinase, putative / uridine mono             | 101  | 146  | 147  | 134  | 154      | 106  | 131  | 134      | 0.98     | 0.888891 | 112  | 137  | 118  | 146  | 121  | 119  | 134  | 138  | 122      | 132      | 0.93     | 0.331374 | 129       | 0.95     | 0.617121 |          |
| 251427_at   | A13g60130  | beta-glucosidase-like protein several beta-glucosyl hydrolase family 1 protein / beta   | 111  | 200  | 167  | 237  | 256      | 213  | 159  | 236      | 0.68     | 0.057338 | 97   | 106  | 131  | 195  | 141  | 133  | 167  | 158  | 111      | 159      | 0.70     | 0.025618 | 156       | 0.71     | 0.107157 |          |
| 251428_at   | A13g60140  | beta-glucosidase-like protein several beta-glucosyl hydrolase family 1 protein          | 25   | 28   | 37   | 30   | 39       | 27   | 30   | 39       | 0.77     | 0.061295 | 20   | 32   | 36   | 18   | 18   | 28   | 21   | 146  | 0.686531 | 21       | 1.46     | 0.033998 | 21        | 1.46     | 0.033998 |          |
| 251429_at   | A13g60190  | dynamitin-like protein 4 (ADL4) - , support dynamitin-like protein E (DLIE)             | 419  | 608  | 662  | 600  | 739      | 507  | 563  | 615      | 0.92     | 0.628832 | 496  | 497  | 534  | 719  | 609  | 529  | 680  | 610  | 509      | 629      | 0.81     | 0.036243 | 619       | 0.82     | 0.124861 |          |
| 251430_at   | A13g60110  | putative protein hvoothelial protein At DNA-binding bromodomain-containing o            | 25   | 31   | 30   | 35   | 30       | 35   | 30   | 32       | 0.90     | 0.291079 | 14   | 14   | 14   | 19   | 14   | 16   | 21   | 15   | 14       | 17       | 0.82     | 0.117794 | 17        | 0.85     | 0.181331 |          |
| 251431_at   | A13g60240  | protein synthesis initiation factor - like / MIF4 domain-containing protein / MA3       | 599  | 791  | 708  | 859  | 919      | 707  | 699  | 828      | 0.84     | 0.200537 | 426  | 336  | 409  | 519  | 465  | 368  | 464  | 445  | 390      | 452      | 0.86     | 0.157536 | 451       | 0.87     | 0.311790 |          |
| 251403_at   | A13g60270  | slayxavin (slayxavin 3) - like protein uclayxavin, putative                             | 52   | 58   | 62   | 28   | 29       | 32   | 27   | 30       | 0.91     | 0.384784 | 22   | 22   | 22   | 27   | 25   | 20   | 35   | 26   | 22       | 27       | 0.33     | 0.235988 | 24        | 0.93     | 0.445566 |          |
| 251402_at   | A13g60280  | SER1 - like protein SER1 protein, Aral oxidoreductase, 2OG-FAD-dependent                | 33   | 41   | 47   | 0.87 | 0.494425 | 33   | 41   | 47       | 0.87     | 0.494425 | 27   | 31   | 34   | 31   | 37   | 42   | 38   | 34   | 31       | 37       | 0.83     | 0.886669 | 35        | 0.89     | 0.204929 |          |
| 251401_at   | A13g60300  | putative protein RING finger protein AR RWD domain-containing protein                   | 446  | 704  | 773  | 506  | 640      | 449  | 641  | 531      | 1.21     | 0.393409 | 611  | 687  | 594  | 798  | 596  | 643  | 706  | 656  | 631      | 680      | 0.93     | 0.346618 | 679       | 0.93     | 0.511766 |          |
| 251404_at   | A13g60310  | putative protein                                                                        | 72   | 97   | 121  | 107  | 116      | 108  | 97   | 111      | 0.88     | 0.396991 | 56   | 50   | 74   | 73   | 67   | 56   | 72   | 64   | 60       | 66       | 0.91     | 0.391859 | 65        | 0.92     | 0.605075 |          |
| 251405_at   | A13g60330  | olasma membrane H+-ATPase - like o ATPase, olasma membrane-tyoe, putative               | 23   | 28   | 33   | 29   | 37       | 26   | 28   | 31       | 0.91     | 0.569914 | 24   | 25   | 26   | 24   | 23   | 21   | 25   | 22   | 25       | 23       | 1.08     | 0.143889 | 23        | 1.10     | 0.129270 |          |
| 251406_at   | A13g60360  | putative protein various predicted prot chaperonin and cell motility protein EL         | 329  | 367  | 375  | 360  | 408      | 328  | 371  | 365      | 0.92     | 0.541262 | 388  | 417  | 391  | 383  | 402  | 390  | 417  | 397  | 394      | 406      | 0.97     | 0.697073 | 407       | 0.97     | 0.762639 |          |
| 251407_at   | A13g60350  | Arm repeat containing protein - like arm armadillo/beta-catenin repeat family vrot      | 89   | 120  | 119  | 145  | 171      | 121  | 110  |          |          |          |      |      |      |      |      |      |      |      |          |          |          |          |           |          |          |          |

|             |           |                                                                                  |      |      |      |      |      |      |      |      |          |          |      |      |      |      |      |      |      |      |      |          |          |          |          |          |          |          |
|-------------|-----------|----------------------------------------------------------------------------------|------|------|------|------|------|------|------|------|----------|----------|------|------|------|------|------|------|------|------|------|----------|----------|----------|----------|----------|----------|----------|
| 251338_at   | A13g06060 | putative protein VAP27, Nicotiana plumb vesicle-associated membrane protein, p   | 1568 | 2008 | 2206 | 2134 | 2207 | 1931 | 1928 | 2091 | 0.92     | 0.472513 | 1672 | 1926 | 1906 | 2561 | 1882 | 1783 | 2342 | 2225 | 1835 | 2159     | 0.85     | 0.159205 | 2075     | 0.88     | 0.403244 |          |
| 251339_at   | A13g07870 | putative protein variously prot expressed protein                                | 19   | 22   | 28   | 33   | 31   | 26   | 23   | 31   | 0.75     | 0.085522 | 15   | 18   | 20   | 33   | 22   | 23   | 33   | 22   | 18   | 27       | 0.66     | 0.053730 | 26       | 0.68     | 0.102761 |          |
| 251340_at   | A13g08330 | actin - like protein actin 3, Drosophila r-actin-related protein 7 (ARP7)        | 415  | 465  | 439  | 575  | 611  | 505  | 440  | 564  | 0.77     | 0.022295 | 404  | 406  | 414  | 624  | 458  | 442  | 427  | 468  | 479  | 0.85     | 0.192823 | 508      | 0.80     | 0.163049 |          |          |
| 251341_at   | A13g07770 | ribosomal protein S13 - like ARPS13A, 40S ribosomal protein S13 (RPS13A)         | 2400 | 2734 | 2837 | 2961 | 2847 | 2691 | 2617 | 2931 | 0.81     | 0.207112 | 2970 | 3160 | 3504 | 3741 | 3263 | 3241 | 2970 | 3504 | 3741 | 0.89     | 0.119252 | 3298     | 0.91     | 0.207041 |          |          |
| 251342_at   | A13g06690 | putative protein SAUR-AC1, Arabidopsis auxin-responsive family protein           | 38   | 47   | 64   | 48   | 48   | 39   | 49   | 45   | 1.10     | 0.622297 | 46   | 73   | 53   | 66   | 50   | 40   | 71   | 77   | 57   | 61       | 0.94     | 0.751346 | 52       | 1.10     | 0.673249 |          |
| 251343_at   | A13g06020 | phosphatidate cytidyltransferase - like phosphatidate cytidyltransferase family, | 96   | 131  | 123  | 138  | 152  | 129  | 116  | 140  | 0.83     | 0.139103 | 98   | 100  | 110  | 142  | 116  | 110  | 131  | 122  | 103  | 124      | 0.82     | 0.033378 | 123      | 0.83     | 0.123868 |          |
| 251344_at   | A13g09020 | putative protein beige-like protein (CDC beige/BEACH domain-containing protein   | 21   | 20   | 20   | 24   | 22   | 22   | 20   | 23   | 0.89     | 0.047276 | 17   | 15   | 18   | 20   | 19   | 14   | 18   | 18   | 17   | 18       | 0.95     | 0.601780 | 18       | 0.96     | 0.748087 |          |
| 251345_at   | A13g09400 | putative protein hypothetical protein                                            | 18   | 17   | 20   | 24   | 21   | 19   | 23   | 0.86 | 0.156926 | 20       | 16   | 23   | 21   | 20   | 21   | 21   | 20   | 19   | 20   | 21       | 1.00     | 0.177244 | 21       | 1.03     | 0.166386 |          |
| 251346_at   | A13g05080 | putative protein hypothetical protein F1 pentatricopeptide (PPR) repeat-containi | 96   | 131  | 143  | 117  | 118  | 97   | 123  | 111  | 1.12     | 0.458988 | 110  | 104  | 109  | 136  | 103  | 95   | 108  | 102  | 108  | 100      | 0.90     | 0.898570 | 112      | 0.97     | 0.774679 |          |
| 251347_at   | A13g01000 | putative protein ferritin 1 precursor - At glycocy hydrolase family protein 85   | 42   | 41   | 70   | 61   | 70   | 67   | 51   | 66   | 0.78     | 0.215054 | 38   | 39   | 46   | 37   | 31   | 31   | 47   | 45   | 41   | 38       | 1.07     | 0.615595 | 33       | 1.23     | 0.077336 |          |
| 251348_at   | A13g01010 | putative protein hypothetical protein F5 glycosyl hydrolase family protein 85    | 25   | 21   | 23   | 20   | 25   | 22   | 22   | 22   | 0.98     | 0.771509 | 15   | 14   | 19   | 19   | 15   | 19   | 16   | 17   | 16   | 17       | 0.93     | 0.474216 | 17       | 0.91     | 0.491052 |          |
| 251349_s_at | A13g01020 | putative protein several hypothetical on pseudogenes, similar to P0034A04.28 /// | 41   | 54   | 57   | 58   | 54   | 48   | 51   | 54   | 0.84     | 0.628424 | 60   | 72   | 62   | 83   | 69   | 60   | 69   | 63   | 69   | 69       | 0.83     | 0.425131 | 71       | 0.91     | 0.448510 |          |
| 251350_at   | A13g01400 | cytochrome P450 monooxygenase-like cytochrome P450 family protein                | 25   | 34   | 27   | 37   | 42   | 35   | 33   | 41   | 0.79     | 0.161213 | 35   | 32   | 39   | 29   | 31   | 34   | 41   | 37   | 36   | 34       | 1.04     | 0.879007 | 31       | 1.14     | 0.128911 |          |
| 251351_s_at | A13g01050 | CalB protein - C2 domain-containing protein /// calcium                          | 376  | 476  | 423  | 504  | 557  | 447  | 425  | 502  | 0.85     | 0.149436 | 350  | 371  | 388  | 486  | 420  | 340  | 358  | 352  | 370  | 391      | 0.94     | 0.584858 | 415      | 0.89     | 0.352747 |          |
| 251352_at   | A13g01070 | putative protein hypothetical protein At peroxisomal biogenesis factor 11 family | 703  | 763  | 851  | 926  | 748  | 699  | 842  | 0.83 | 0.090146 | 713      | 727  | 701  | 1067 | 889  | 777  | 898  | 905  | 714  | 907  | 0.79     | 0.020710 | 911      | 0.78     | 0.080923 |          |          |
| 251353_at   | A13g01080 | putative protein hypothetical protein - 3 fructosamine kinase family protein     | 81   | 135  | 132  | 118  | 152  | 129  | 116  | 133  | 0.87     | 0.457385 | 109  | 113  | 127  | 173  | 129  | 125  | 131  | 131  | 116  | 138      | 0.84     | 0.135172 | 142      | 0.82     | 0.186286 |          |
| 251354_at   | A13g01090 | putative protein hypothetical protein T1 expressed protein                       | 116  | 132  | 163  | 144  | 152  | 134  | 137  | 143  | 0.95     | 0.681677 | 135  | 142  | 155  | 169  | 148  | 132  | 118  | 108  | 144  | 135      | 1.07     | 0.578234 | 150      | 0.96     | 0.673437 |          |
| 251355_at   | A13g01100 | putative protein hypothetical protein T1 fructosamine kinase                     | 205  | 302  | 269  | 260  | 255  | 204  | 259  | 240  | 1.08     | 0.603318 | 300  | 308  | 305  | 379  | 280  | 299  | 301  | 290  | 304  | 310      | 0.98     | 0.825265 | 319      | 0.95     | 0.649836 |          |
| 251356_at   | A13g01060 | putative protein hypothetical protein - F-box family protein / lectin-related    | 195  | 366  | 462  | 183  | 245  | 150  | 341  | 192  | 1.77     | 0.147757 | 94   | 101  | 85   | 137  | 121  | 104  | 108  | 101  | 93   | 114      | 0.82     | 0.068985 | 121      | 0.77     | 0.060263 |          |
| 251357_at   | A13g01110 | ribosomal protein S27 - supported by c 40S ribosomal protein S27 (AR527A)        | 2757 | 3338 | 3451 | 3573 | 3910 | 3520 | 3182 | 3667 | 0.87     | 0.120830 | 3074 | 3185 | 3418 | 3926 | 3465 | 3125 | 3329 | 3443 | 3226 | 3457     | 0.93     | 0.296939 | 3505     | 0.92     | 0.331897 |          |
| 251358_at   | A13g01160 | shaggy-like kinase beta - shaggy-related protein kinase beta / Asi               | 145  | 131  | 155  | 100  | 124  | 70   | 143  | 98   | 1.46     | 0.054953 | 61   | 68   | 69   | 46   | 52   | 46   | 46   | 46   | 48   | 48       | 1.38     | 0.003524 | 49       | 1.35     | 0.008034 |          |
| 251359_at   | A13g01170 | putative protein several hypothetical on pentatricopeptide (PPR) repeat-containi | 43   | 49   | 58   | 58   | 63   | 48   | 50   | 56   | 0.89     | 0.356719 | 31   | 34   | 40   | 36   | 28   | 33   | 40   | 35   | 35   | 35       | 1.01     | 0.940414 | 33       | 1.07     | 0.565645 |          |
| 251360_at   | A13g01210 | putative protein embryonic abundant o embryo-abundant protein-related            | 23   | 25   | 25   | 25   | 25   | 25   | 25   | 25   | 0.93     | 0.307644 | 17   | 20   | 20   | 20   | 20   | 20   | 21   | 19   | 20   | 21       | 0.93     | 0.225340 | 20       | 0.95     | 0.471595 |          |
| 251361_at   | A13g01230 | LIM domain protein LIM domain protein LIM domain-containing protein              | 27   | 30   | 41   | 34   | 33   | 37   | 32   | 35   | 0.94     | 0.641951 | 27   | 31   | 35   | 35   | 33   | 25   | 33   | 25   | 31   | 28       | 1.12     | 0.441628 | 27       | 1.15     | 0.432332 |          |
| 251362_at   | A13g01240 | DEAD box RNA helicase RH12 - DEAD/DEAH box helicase, putative (RH                | 410  | 505  | 515  | 706  | 726  | 592  | 491  | 675  | 0.73     | 0.036062 | 350  | 340  | 393  | 594  | 463  | 397  | 450  | 429  | 361  | 466      | 0.77     | 0.063076 | 485      | 0.74     | 0.107558 |          |
| 251363_at   | A13g01250 | putative transcription factor (MYB17) - myb family transcription factor (MYB17)  | 661  | 848  | 883  | 730  | 855  | 600  | 797  | 728  | 1.09     | 0.531070 | 878  | 832  | 863  | 1174 | 982  | 912  | 925  | 937  | 832  | 858      | 0.99     | 0.86     | 0.063669 | 1023     | 0.84     | 0.106069 |
| 251364_at   | A13g01300 | anthranilate phosphoribosyltransferase C2 domain-containing protein              | 47   | 63   | 60   | 62   | 61   | 53   | 61   | 53   | 0.87     | 0.203695 | 35   | 58   | 58   | 45   | 38   | 52   | 54   | 50   | 47   | 1.08     | 0.610754 | 43       | 1.18     | 0.402254 |          |          |
| 251365_at   | A13g01310 | putative DNA-binding protein At2g336; DNA-binding family protein                 | 1179 | 1284 | 1162 | 1528 | 1698 | 1298 | 1208 | 1508 | 0.80     | 0.069775 | 922  | 844  | 990  | 1470 | 1258 | 1062 | 1183 | 1175 | 919  | 1230     | 0.75     | 0.017380 | 1264     | 0.73     | 0.051125 |          |
| 251366_at   | A13g01340 | putative protein several hypothetical on F-box family protein                    | 63   | 74   | 85   | 55   | 61   | 67   | 74   | 61   | 1.21     | 0.152049 | 74   | 96   | 89   | 70   | 60   | 70   | 73   | 74   | 86   | 70       | 1.24     | 0.027391 | 67       | 1.29     | 0.056578 |          |
| 251367_at   | A13g01350 | Sit1 interacting partner 4 (SKIP4), a SKIP1 interacting partner 4 (SKIP4)        | 115  | 157  | 162  | 183  | 183  | 162  | 117  | 128  | 0.97     | 0.126891 | 117  | 127  | 142  | 202  | 147  | 152  | 178  | 168  | 172  | 178      | 0.78     | 0.092116 | 187      | 0.77     | 0.096895 |          |
| 251368_at   | A13g01380 | putative protein hypothetical protein At expressed protein                       | 47   | 58   | 62   | 53   | 66   | 48   | 55   | 56   | 0.99     | 0.955296 | 43   | 27   | 38   | 56   | 48   | 44   | 39   | 44   | 36   | 46       | 0.77     | 0.080381 | 49       | 0.72     | 0.078083 |          |
| 251334_at   | A13g01390 | putative protein several hypothetical on U-box domain-containing protein         | 27   | 30   | 33   | 35   | 37   | 42   | 30   | 38   | 0.80     | 0.053610 | 26   | 28   | 35   | 31   | 32   | 26   | 28   | 28   | 30   | 29       | 1.03     | 0.753926 | 29       | 1.01     | 0.925966 |          |
| 251335_at   | A13g01400 | 1-aminocyclopropane-1-carboxylate o 2-oxoglutarate-dependent dioxygenase, 2-     | 24   | 25   | 33   | 33   | 35   | 27   | 33   | 82   | 1.18505  | 22       | 24   | 31   | 25   | 24   | 25   | 27   | 22   | 26   | 25   | 1.05     | 0.649459 | 29       | 1.04     | 0.731018 |          |          |
| 251336_at   | A13g01190 | putative protein hypothetical protein F1 BDN1-associated protein 1 (BAP1)        | 361  | 649  | 820  | 837  | 499  | 407  | 719  | 69   | 0.176503 | 168      | 211  | 159  | 219  | 212  | 197  | 275  | 179  | 235  | 0.76 | 0.065029 | 209      | 0.86     | 0.159133 |          |          |          |
| 251306_at   | A13g01260 | putative DNA-binding protein DNA-bin1 DNA-binding family protein / remorin fan   | 391  | 638  | 770  | 380  | 563  | 342  | 600  | 428  | 1.40     | 0.258678 | 564  | 837  | 506  | 663  | 507  | 581  | 611  | 652  | 636  | 603      | 1.05     | 0.706612 | 584      | 1.09     | 0.665682 |          |
| 251307_at   | A13g01200 | putative protein - supported by full-length thioesterase family protein          | 152  | 199  | 229  | 192  | 250  | 181  | 194  | 208  | 0.93     | 0.670410 | 209  | 258  | 205  | 303  | 203  | 217  | 263  | 259  | 224  | 249      | 0.90     | 0.389073 | 241      | 0.93     | 0.662641 |          |
| 251308_at   | A13g01130 | putative protein several hypothetical on glycosyl transferase family 8 protein   | 310  | 342  | 299  | 371  | 397  | 282  | 317  | 350  | 0.91     | 0.425856 | 264  | 205  | 288  | 299  | 279  | 223  | 241  | 244  | 252  | 257      | 0.98     | 0.883619 | 267      | 0.95     | 0.687962 |          |
| 251309_at   | A13g01220 | putative protein carbonyl reductase (N short-chain dehydrogenase/reductase (5    | 51   | 34   | 52   | 49   | 41   | 40   | 39   | 44   | 0.90     | 0.555875 | 32   | 33   | 41   | 33   | 27   | 46   | 41   | 35   | 37   | 41       | 0.75     | 0.01519  | 34       | 1.04     | 0.776887 |          |
| 251310_at   | A13g01150 | homeobox protein Anthocyaninless2 A homeobox-leucine zipper family protein       | 383  | 466  | 449  | 364  | 406  | 333  | 433  | 368  | 1.18     | 0.118544 | 291  | 248  | 346  | 381  | 326  | 275  | 338  | 345  | 295  | 333      | 0.89     | 0.265119 | 327      | 0.90     | 0.482651 |          |
| 251311_at   | A13g01140 | FUSCA PROTEIN FUS2 - supported b COP9 stanolesome complex subunit 1 /            | 422  | 464  | 494  | 589  | 623  | 495  | 460  | 569  | 0.81     | 0.068636 | 495  | 524  | 519  | 795  | 638  | 548  | 590  | 541  | 513  | 622      | 0.82     | 0.128812 | 660      | 0.78     | 0.112540 |          |
| 251312_at   | A13g01120 | MADS-box protein AGL13 - supported MADS-box protein (AGL13)                      | 424  | 465  | 70   | 37   | 34   | 36   | 63   | 35   | 1.79     | 0.040674 | 71   | 45   | 52   | 36   | 39   | 36   | 39   | 33   | 47   | 37       | 1.27     | 0.101571 | 37       | 1.26     | 0.042275 |          |
| 251313_at   | A13g01360 | putative protein several hypothetical on SKIP1 interacting partner 4 (SKIP4)     | 82   | 105  | 102  | 115  | 97   | 87   | 105  | 93   | 0.83     | 0.469144 | 71   | 70   | 92   | 87   | 84   | 89   | 82   | 78   | 87   | 84       | 0.89     | 0.238978 | 85       | 0.91     | 0.473302 |          |
| 251314_at   | A13g01180 | putative protein several hypothetical on zinc finger (C3HC4-type RING finger) fa | 235  | 314  | 372  | 362  | 417  | 288  | 307  | 356  | 0.86     | 0.424067 | 339  | 399  | 406  | 384  | 502  | 417  | 405  | 433  | 405  | 433      | 0.84     | 0.432481 | 405      | 0.82     | 0.058131 |          |
| 251315_at   | A13g01410 | putative protein several kinase homolo hypothetical protein                      | 27   | 24   | 32   | 27   | 33   | 29   | 28   | 30   | 0.93     | 0.462923 | 23   | 27   | 34   | 29   | 24   | 21   | 24   | 26   | 28   | 25       | 1.14     | 0.309515 | 25       | 1.14     | 0.455999 |          |
| 251316_s_at | A13g01480 | putative protein putative protein BcDN expressed protein /// expressed protein   | 204  | 282  | 246  | 294  | 341  | 251  | 244  | 295  | 0.83     | 0.213145 | 213  | 178  | 217  | 213  | 239  | 196  | 238  | 228  | 203  | 235      | 0.86     | 0.139875 | 237      | 0.86     | 0.261647 |          |
| 251317_at   | A13g01490 | putative protein solvocalactonase - Zt olivose hydrolase faml 28 protein o       | 1069 | 1150 | 1112 | 1919 | 2057 | 1692 | 1111 | 1889 | 0.59     | 0.002018 | 596  | 620  | 662  | 1433 | 1091 | 968  | 935  | 930  | 626  | 1071     | 0.58     | 0.012962 | 1164     | 0.54     | 0.018726 |          |
| 251318_at   | A13g01500 | putative protein putative protein At2g466 intracellular protein transport factor | 128  | 173  | 176  | 181  | 158  | 158  | 158  | 158  | 0.95     | 0.172600 | 114  | 128  | 142  | 163  | 142  | 156  | 138  | 126  | 141  | 142      | 0.88     | 0.264359 | 140      | 0.90     | 0.477785 |          |
| 251319_at   | A13g01    |                                                                                  |      |      |      |      |      |      |      |      |          |          |      |      |      |      |      |      |      |      |      |          |          |          |          |          |          |          |

|             |           |                                                                                           |      |      |      |      |      |      |      |      |      |          |       |      |      |      |      |      |          |      |      |      |      |          |      |      |          |
|-------------|-----------|-------------------------------------------------------------------------------------------|------|------|------|------|------|------|------|------|------|----------|-------|------|------|------|------|------|----------|------|------|------|------|----------|------|------|----------|
| 251243_at   | A13g61870 | putative protein hypothetical protein - f expressed protein                               | 156  | 335  | 238  | 304  | 333  | 243  | 243  | 294  | 0.83 | 0.435408 | 273   | 349  | 308  | 481  | 343  | 338  | 380      | 380  | 310  | 384  | 0.81 | 0.096985 | 388  | 0.80 | 0.208694 |
| 251244_at   | A13g62060 | pectinacetylesterase precursor-like cnc pectinacetylesterase family protein               | 143  | 201  | 157  | 169  | 213  | 180  | 167  | 181  | 0.92 | 0.600150 | 186   | 186  | 185  | 216  | 185  | 180  | 210      | 183  | 186  | 191  | 0.97 | 0.711493 | 187  | 0.99 | 0.937931 |
| 251245_at   | A13g62090 | autative protein dvthochrom-assoaiat basic helix-loop-helix (bHLH) protein. ou            | 24   | 31   | 40   | 39   | 41   | 35   | 32   | 38   | 0.83 | 0.257319 | 53    | 59   | 62   | 56   | 51   | 57   | 64       | 56   | 58   | 57   | 1.03 | 0.650061 | 55   | 1.07 | 0.320823 |
| 251246_at   | A13g62100 | auxin-induced protein homioox auxin-i auxin-responsive protein, putative                  | 41   | 51   | 49   | 51   | 49   | 51   | 52   | 50   | 0.86 | 0.875086 | 27    | 41   | 30   | 26   | 28   | 27   | 25       | 26   | 23   | 25   | 1.01 | 0.973005 | 26   | 1.03 | 0.920118 |
| 251247_at   | A13g62140 | hypothetical protein                                                                      | 220  | 264  | 266  | 285  | 295  | 282  | 250  | 287  | 0.87 | 0.075511 | 275   | 303  | 297  | 427  | 319  | 277  | 352      | 329  | 292  | 341  | 0.86 | 0.192770 | 341  | 0.86 | 0.339113 |
| 251248_at   | A13g62150 | P-glycoprotein-like protein P-glycoprot multitransf resistant (MDR) ABC transporter       | 37   | 48   | 55   | 60   | 65   | 58   | 57   | 61   | 0.93 | 0.781969 | 24    | 25   | 36   | 36   | 28   | 27   | 40       | 45   | 28   | 35   | 0.80 | 0.240123 | 30   | 0.93 | 0.678814 |
| 251249_at   | A13g62160 | autative protein 10-deacetylbaacatin II ferulidase family protein                         | 36   | 41   | 50   | 47   | 57   | 51   | 42   | 52   | 0.81 | 0.132442 | 34    | 37   | 49   | 46   | 39   | 41   | 40       | 39   | 40   | 41   | 0.98 | 0.833378 | 42   | 0.96 | 0.735881 |
| 251250_at   | A13g62180 | autative protein methylesterase invertase/pectin methyltransferase inhibitor              | 88   | 75   | 70   | 68   | 80   | 70   | 124  | 86   | 0.93 | 0.136688 | 58    | 61   | 49   | 51   | 51   | 56   | 61       | 54   | 57   | 62   | 1.13 | 0.146687 | 54   | 1.07 | 0.666177 |
| 251251_at   | A13g62220 | serine/threonine protein kinase-like cnc serine/threonine protein kinase, putative        | 223  | 269  | 327  | 280  | 360  | 269  | 273  | 303  | 0.90 | 0.509801 | 265   | 292  | 276  | 371  | 306  | 290  | 315      | 311  | 277  | 310  | 0.87 | 0.075620 | 322  | 0.86 | 0.158979 |
| 251252_at   | A13g62230 | autative protein several hypothetical cnc F-box family protein                            | 108  | 41   | 76   | 33   | 68   | 27   | 75   | 43   | 1.75 | 0.237085 | 38    | 47   | 34   | 24   | 15   | 32   | 15       | 16   | 40   | 20   | 1.94 | 0.010136 | 24   | 1.68 | 0.060516 |
| 251253_at   | A13g62240 | autative zinc-finger protein zinc-zinc finger (C2H2 type) family protein                  | 272  | 364  | 395  | 371  | 411  | 328  | 343  | 370  | 0.93 | 0.585451 | 272   | 249  | 260  | 329  | 272  | 256  | 291      | 287  | 260  | 287  | 0.91 | 0.163131 | 286  | 0.91 | 0.330730 |
| 251254_at   | A13g62270 | autative protein anion exchanger 3, ca anion exchanger family protein                     | 36   | 42   | 48   | 47   | 58   | 42   | 42   | 40   | 0.96 | 0.265328 | 36    | 31   | 42   | 40   | 37   | 42   | 45       | 36   | 41   | 40   | 0.88 | 0.146739 | 40   | 0.91 | 0.385144 |
| 251255_at   | A13g62280 | putative protein early nodule-specific o GDS3-motif lipase/hydrolase family prot          | 44   | 49   | 47   | 53   | 53   | 50   | 47   | 52   | 0.90 | 0.033699 | 43    | 50   | 42   | 47   | 40   | 42   | 39       | 44   | 42   | 45   | 1.04 | 0.531201 | 43   | 1.04 | 0.657186 |
| 251256_at   | A13g62300 | putative protein hypothetical proteins - , agenet domain-containing protein               | 520  | 722  | 720  | 798  | 895  | 706  | 654  | 800  | 0.82 | 0.167562 | 533   | 468  | 581  | 765  | 639  | 564  | 693      | 685  | 527  | 669  | 0.79 | 0.029900 | 656  | 0.80 | 0.126902 |
| 251257_at   | A13g62290 | ADP-ribosylation factor-like protein ADP-ribosylation factor                              | 2943 | 3753 | 3858 | 3445 | 3981 | 2952 | 3518 | 3460 | 1.02 | 0.894465 | 2675  | 3164 | 2828 | 3640 | 3022 | 2963 | 3349     | 3318 | 2889 | 3258 | 0.89 | 0.106123 | 3208 | 0.90 | 0.289952 |
| 251258_at   | A13g62170 | PECTININSTERASE-like protein PECT1 pectinesterase family protein                          | 72   | 59   | 74   | 52   | 58   | 51   | 68   | 53   | 1.28 | 0.048156 | 33    | 35   | 36   | 34   | 31   | 30   | 37       | 32   | 35   | 33   | 1.06 | 0.374886 | 31   | 1.10 | 0.124087 |
| 251259_at   | A13g62260 | autative protein rhosphocolein choso protein rhospholase 2c, autative / PP2c              | 139  | 175  | 227  | 279  | 323  | 189  | 180  | 263  | 0.69 | 0.152435 | 85    | 62   | 79   | 115  | 98   | 83   | 113      | 103  | 82   | 102  | 0.80 | 0.038234 | 98   | 0.83 | 0.146323 |
| 251260_at   | A13g62130 | autative protein ISOPENICILLIN N PEPT1 epimerase-related                                  | 438  | 644  | 692  | 669  | 743  | 557  | 591  | 656  | 0.90 | 0.532822 | 449   | 434  | 487  | 708  | 529  | 527  | 620      | 593  | 456  | 596  | 0.77 | 0.023222 | 588  | 0.78 | 0.100510 |
| 251261_at   | A13g62110 | autative protein polyalactonase - L <sub>1</sub> alucosyl hydrolase family 28 protein / p | 126  | 192  | 170  | 186  | 226  | 169  | 163  | 194  | 0.84 | 0.294357 | 103   | 100  | 116  | 154  | 129  | 110  | 140      | 137  | 106  | 134  | 0.79 | 0.032555 | 131  | 0.81 | 0.138336 |
| 251262_at   | A13g62080 | hypothetical protein ; supported by full- cnc SNF1 family protein                         | 71   | 95   | 95   | 98   | 112  | 95   | 87   | 102  | 0.85 | 0.202821 | 84    | 63   | 85   | 116  | 91   | 84   | 90       | 83   | 84   | 83   | 0.91 | 0.311809 | 97   | 0.87 | 0.255410 |
| 251263_at   | A13g62190 | putative protein DNAI PROTEIN - Syn DNAI heat shock N-terminal domain-co                  | 284  | 426  | 476  | 419  | 512  | 394  | 395  | 442  | 0.90 | 0.532847 | 351   | 446  | 402  | 601  | 459  | 417  | 433      | 408  | 399  | 464  | 0.86 | 0.257156 | 403  | 0.81 | 0.207099 |
| 251264_at   | A13g62120 | multifunctional aminocyl-RNA liase- RNA synthetase class II (G. H. P and S                | 839  | 997  | 922  | 1044 | 1097 | 842  | 919  | 994  | 0.92 | 0.450794 | 813   | 638  | 757  | 928  | 834  | 727  | 836      | 819  | 736  | 829  | 0.89 | 0.153519 | 830  | 0.89 | 0.293833 |
| 251265_at   | A13g62100 | ATP-dependent RNA helicase-like orol RNA helicase, putative                               | 414  | 460  | 580  | 556  | 593  | 448  | 485  | 533  | 0.91 | 0.508702 | 414   | 397  | 476  | 586  | 472  | 411  | 491      | 493  | 429  | 491  | 0.87 | 0.187344 | 490  | 0.88 | 0.344024 |
| 251266_at   | A13g62320 | autative protein hypothetical protein At1 hypothetical protein                            | 88   | 108  | 117  | 98   | 102  | 88   | 104  | 96   | 1.00 | 0.444771 | 84    | 92   | 126  | 74   | 85   | 93   | 69       | 93   | 101  | 83   | 1.22 | 0.187350 | 84   | 1.20 | 0.298036 |
| 251267_at   | A13g62330 | putative protein hypothetical protein B/ zinc knuckle (CHCH-type) family protein          | 174  | 184  | 230  | 225  | 241  | 181  | 196  | 216  | 0.91 | 0.478924 | 199   | 217  | 228  | 289  | 249  | 214  | 256      | 253  | 215  | 252  | 0.85 | 0.071722 | 251  | 0.86 | 0.198885 |
| 251268_at   | A13g62350 | putative protein hypothetical proteins - , hypothetical protein                           | 21   | 25   | 32   | 30   | 29   | 34   | 26   | 31   | 0.84 | 0.202773 | 18    | 16   | 19   | 19   | 16   | 15   | 20       | 17   | 18   | 17   | 1.03 | 0.744608 | 16   | 1.07 | 0.482276 |
| 251269_at   | A13g62360 | putative protein Pm5 protein - Homo s expressed protein                                   | 619  | 754  | 711  | 830  | 896  | 653  | 694  | 793  | 0.88 | 0.300376 | 590   | 423  | 620  | 684  | 628  | 499  | 542      | 543  | 545  | 579  | 0.94 | 0.604347 | 604  | 0.90 | 0.511889 |
| 251270_at   | A13g62370 | putative protein                                                                          | 206  | 236  | 215  | 263  | 289  | 230  | 219  | 261  | 0.84 | 0.098863 | 228   | 265  | 257  | 375  | 284  | 255  | 287      | 278  | 250  | 296  | 0.85 | 0.162131 | 304  | 0.82 | 0.223750 |
| 251236_at   | A13g62380 | autative protein hypothetical proteins - , hypothetical protein                           | 29   | 24   | 21   | 19   | 22   | 21   | 22   | 20   | 1.06 | 0.812942 | 14    | 13   | 22   | 15   | 14   | 15   | 16       | 15   | 16   | 15   | 1.10 | 0.471743 | 15   | 1.11 | 0.567411 |
| 251237_at   | A13g62390 | bZIP transcription factor-like protein D1 CP12 domain-containing protein                  | 74   | 597  | 740  | 619  | 593  | 768  | 545  | 717  | 0.70 | 0.086688 | 818   | 822  | 732  | 1093 | 862  | 885  | 0.981419 | 958  | 791  | 903  | 0.87 | 0.081497 | 902  | 0.86 | 0.138925 |
| 251238_at   | A13g62430 | putative protein several hypothetical prn F-box family protein                            | 80   | 101  | 123  | 115  | 118  | 108  | 101  | 114  | 0.88 | 0.328885 | 67    | 61   | 83   | 99   | 78   | 69   | 83       | 75   | 70   | 83   | 0.87 | 0.265632 | 82   | 0.86 | 0.371798 |
| 251239_at   | A13g62440 | putative protein several hypothetical prn F-box family protein                            | 17   | 19   | 24   | 20   | 24   | 26   | 20   | 23   | 0.86 | 0.283750 | 16    | 19   | 29   | 19   | 16   | 16   | 16       | 20   | 17   | 22   | 1.22 | 0.255169 | 17   | 1.25 | 0.342171 |
| 251240_at   | A13g62450 | putative protein                                                                          | 203  | 250  | 267  | 300  | 315  | 249  | 240  | 288  | 0.83 | 0.155834 | 239   | 254  | 264  | 387  | 291  | 288  | 302      | 291  | 252  | 312  | 0.81 | 0.036156 | 322  | 0.78 | 0.103781 |
| 251241_s_at | A13g62460 | autative protein alpha-helical protein - expressed protein (// PBS lase HEAT-II           | 780  | 914  | 947  | 1166 | 914  | 1025 | 880  | 1095 | 0.80 | 0.030131 | 896   | 1216 | 1141 | 1653 | 1221 | 1105 | 1311     | 1086 | 1084 | 1240 | 0.87 | 0.362483 | 1326 | 0.82 | 0.273438 |
| 251211_s_at | A13g62470 | autative protein several hypothetical cnc pentatricopeptide (PPR) repeat-containi         | 67   | 93   | 109  | 97   | 108  | 86   | 90   | 97   | 0.93 | 0.631846 | 65    | 59   | 62   | 90   | 67   | 60   | 81       | 62   | 78   | 80   | 0.80 | 0.102702 | 72   | 0.85 | 0.314679 |
| 251212_at   | A13g62480 | autative protein hypothetical protein At1 hypothetical protein -// hvoothetical ro        | 12   | 15   | 18   | 18   | 16   | 21   | 15   | 18   | 0.81 | 0.180899 | 10    | 11   | 16   | 18   | 15   | 14   | 14       | 13   | 13   | 15   | 0.85 | 0.225721 | 16   | 0.79 | 0.169634 |
| 251213_at   | A13g62490 | putative protein hypothetical proteins - , hypothetical protein -// filament protein      | 7    | 7    | 6    | 6    | 8    | 6    | 6    | 7    | 0.89 | 0.326644 | 6     | 6    | 4    | 5    | 3    | 5    | 7        | 4    | 5    | 5    | 1.03 | 0.888872 | 5    | 1.14 | 0.544175 |
| 251214_at   | A13g62500 | putative protein hypothetical protein - expressed protein                                 | 57   | 83   | 79   | 107  | 73   | 74   | 89   | 85   | 0.85 | 0.403958 | 46    | 43   | 54   | 50   | 48   | 53   | 64       | 51   | 49   | 53   | 0.91 | 0.081219 | 50   | 0.96 | 0.149227 |
| 251215_at   | A13g62510 | putative protein region within disulfide- protein disulfide isomerase-related             | 32   | 37   | 41   | 31   | 40   | 36   | 37   | 36   | 1.03 | 0.804034 | 16    | 16   | 23   | 23   | 20   | 16   | 28       | 23   | 19   | 22   | 0.88 | 0.425557 | 20   | 0.98 | 0.097603 |
| 251216_at   | A13g62520 | autative protein hypothetical protein a. hAT-like transposase family (hobo)/Ac/Tc         | 50   | 60   | 67   | 62   | 78   | 66   | 62   | 61   | 0.91 | 0.554905 | 51    | 39   | 51   | 54   | 49   | 46   | 48       | 49   | 47   | 49   | 0.95 | 0.523039 | 50   | 0.94 | 0.578429 |
| 251217_at   | A13g62560 | Sar1-like GTP binding protein small G- GTP-binding protein, putative                      | 480  | 656  | 667  | 700  | 884  | 602  | 601  | 728  | 0.83 | 0.281897 | 750   | 757  | 721  | 1054 | 1005 | 866  | 878      | 837  | 743  | 928  | 0.80 | 0.108086 | 975  | 0.76 | 0.015436 |
| 251218_at   | A13g62410 | CP12 protein precursor-like protein CP-CP12 domain-containing protein                     | 42   | 56   | 78   | 65   | 59   | 57   | 42   | 51   | 0.97 | 0.832491 | 47    | 51   | 55   | 68   | 55   | 62   | 47       | 51   | 51   | 52   | 0.92 | 0.226575 | 62   | 0.83 | 0.086196 |
| 251219_at   | A13g62300 | putative protein several hypothetical prn expressed protein                               | 105  | 122  | 112  | 122  | 106  | 113  | 110  | 105  | 0.95 | 0.495363 | 102   | 105  | 120  | 136  | 124  | 119  | 138      | 126  | 119  | 118  | 0.88 | 0.221335 | 119  | 0.82 | 0.307066 |
| 251220_at   | A13g62300 | cytochrome c oxidase subunit 5o-like c expressed protein                                  | 869  | 1152 | 1130 | 1188 | 1260 | 1071 | 1050 | 1173 | 0.90 | 0.317891 | 1108  | 1075 | 1144 | 1409 | 1224 | 1092 | 1149     | 1123 | 1109 | 1200 | 0.92 | 0.285864 | 1242 | 0.89 | 0.231660 |
| 251221_at   | A13g62550 | putative protein ER6 protein - Lycopodium universal stress protein (USP) family prc       | 449  | 429  | 342  | 58   | 80   | 55   | 158  | 64   | 2.46 | 0.370323 | 45    | 49   | 40   | 54   | 43   | 65   | 70       | 63   | 44   | 59   | 0.75 | 0.065936 | 54   | 0.82 | 0.217892 |
| 251222_at   | A13g62580 | autative membrane protein clone 2-72, expressed protein                                   | 34   | 87   | 432  | 549  | 644  | 506  | 401  | 566  | 0.71 | 0.029580 | 463   | 498  | 508  | 688  | 613  | 536  | 569      | 556  | 490  | 593  | 0.83 | 0.033083 | 613  | 0.80 | 0.055325 |
| 251223_at   | A13g62610 | putative protein putative kinase MYB11 - myb family transcription factor                  | 122  | 121  | 121  | 116  | 114  | 114  | 116  | 116  | 0.98 | 0.141434 | 56    | 75   | 68   | 61   | 65   | 69   | 53       | 72   | 61   | 65   | 0.90 | 0.464872 | 73   | 0.73 | 0.146627 |
| 251224_at   | A13g62620 | hypothetical protein                                                                      | 151  | 198  | 189  | 177  | 193  | 164  | 179  | 178  | 1.01 | 0.959887 | 180</ |      |      |      |      |      |          |      |      |      |      |          |      |      |          |

|            |           |                                                                                              |     |     |     |     |     |     |       |      |          |          |     |      |      |      |      |      |      |      |      |      |          |          |      |          |          |      |          |
|------------|-----------|----------------------------------------------------------------------------------------------|-----|-----|-----|-----|-----|-----|-------|------|----------|----------|-----|------|------|------|------|------|------|------|------|------|----------|----------|------|----------|----------|------|----------|
| 25156_at   | A15g33060 | putative protein ZCF61, Arabidopsis th circadian clock coupling factor, putative             | 48  | 74  | 99  | 99  | 100 | 80  | 74    | 93   | 0.80     | 0.305199 | 44  | 25   | 66   | 70   | 57   | 63   | 62   | 49   | 45   | 60   | 0.75     | 0.177263 | 63   | 0.71     | 0.221912 |      |          |
| 25157_at   | A15g33140 | mRNA binding protein precursor - like - mRNA-binding protein, putative                       | 49  | 89  | 67  | 77  | 61  | 54  | 68    | 64   | 1.06     | 0.775885 | 83  | 109  | 109  | 125  | 79   | 79   | 95   | 84   | 101  | 92   | 1.09     | 0.561943 | 95   | 1.06     | 0.752472 |      |          |
| 25158_at   | A15g33150 | rac-GTP binding protein -like RACP an GTP-binding protein-related                            | 172 | 229 | 237 | 258 | 308 | 205 | 213   | 257  | 0.83     | 0.284950 | 174 | 142  | 174  | 204  | 190  | 156  | 200  | 197  | 163  | 189  | 0.86     | 0.11273  | 183  | 0.89     | 0.327536 |      |          |
| 25159_at   | A15g33200 | putative protein Hsp90alpha1 - Hsp90alpha1-related protein-related                           | 19  | 25  | 25  | 25  | 26  | 23  | 25    | 0.52 | 0.405808 | 19       | 20  | 19   | 19   | 14   | 14   | 16   | 14   | 16   | 14   | 17   | 0.373514 | 19       | 1.17 | 0.095138 |          |      |          |
| 25160_at   | A15g33240 | inositol-1,4,5-trisphosphate 5-Phospho endonuclease/exonuclease/ribonuclease                 | 79  | 143 | 82  | 154 | 184 | 137 | 101   | 159  | 0.64     | 0.084411 | 71  | 66   | 82   | 125  | 107  | 81   | 95   | 91   | 73   | 100  | 0.73     | 0.044639 | 104  | 0.70     | 0.082878 |      |          |
| 25161_at   | A15g33290 | putative protein hypothetical protein St expressed protein                                   | 103 | 139 | 141 | 182 | 196 | 173 | 128   | 184  | 0.70     | 0.015898 | 167 | 173  | 176  | 246  | 194  | 180  | 193  | 203  | 172  | 203  | 0.85     | 0.090469 | 207  | 0.83     | 0.168053 |      |          |
| 25162_at   | A15g33300 | putative protein hypothetical proteins -, expressed protein                                  | 189 | 326 | 253 | 467 | 578 | 403 | 256   | 483  | 0.53     | 0.024881 | 306 | 282  | 327  | 593  | 410  | 418  | 412  | 355  | 305  | 436  | 0.70     | 0.055206 | 470  | 0.65     | 0.057415 |      |          |
| 25163_at   | A15g33310 | putative protein Hsp70 - Hsp70-related protein                                               | 262 | 371 | 377 | 459 | 360 | 271 | 390   | 381  | 0.13     | 0.339532 | 360 | 373  | 418  | 680  | 532  | 440  | 528  | 528  | 528  | 528  | 0.78     | 0.039529 | 528  | 0.77     | 0.026153 |      |          |
| 25164_s_at | A15g33320 | putative protein hypothetical protein chophosphate 2 protein chophosphate 2C-related / PP2C- | 24  | 25  | 25  | 29  | 33  | 24  | 25    | 29   | 0.86     | 0.179845 | 26  | 33   | 31   | 24   | 26   | 27   | 37   | 26   | 30   | 28   | 1.06     | 0.676088 | 26   | 1.16     | 0.139647 |      |          |
| 25165_at   | A15g33330 | putative protein different MAP kinases protein kinase family protein                         | 49  | 51  | 77  | 60  | 72  | 66  | 59    | 66   | 0.89     | 0.506642 | 23  | 22   | 27   | 32   | 24   | 21   | 30   | 26   | 24   | 27   | 0.90     | 0.422432 | 26   | 0.94     | 0.684684 |      |          |
| 25166_at   | A15g33350 | heat shock transcription factor-like oroi heat shock transcription factor family orc         | 18  | 23  | 29  | 30  | 39  | 40  | 23    | 36   | 0.64     | 0.043228 | 17  | 18   | 19   | 24   | 16   | 13   | 20   | 21   | 18   | 19   | 0.94     | 0.682626 | 18   | 1.00     | 0.991279 |      |          |
| 25167_at   | A15g33360 | putative protein proteinase inhibitor - C-defensin-related                                   | 19  | 23  | 23  | 24  | 24  | 25  | 22    | 24   | 0.89     | 0.071787 | 17  | 18   | 27   | 16   | 16   | 13   | 18   | 21   | 21   | 19   | 1.17     | 0.298148 | 16   | 1.28     | 0.226877 |      |          |
| 25168_at   | A15g33370 | putative protein several hypothetical on pentatricopeptide (PPR) repeat-contains             | 19  | 24  | 28  | 34  | 30  | 29  | 26    | 31   | 0.83     | 0.34927  | 27  | 27   | 35   | 27   | 24   | 26   | 32   | 28   | 28   | 28   | 1.08     | 0.43954  | 28   | 1.16     | 0.220590 |      |          |
| 25169_at   | A15g33210 | putative protein putative protein A12d2- expressed protein                                   | 121 | 187 | 181 | 296 | 349 | 248 | 163   | 298  | 0.55     | 0.019669 | 286 | 322  | 262  | 416  | 323  | 359  | 389  | 372  | 290  | 372  | 0.78     | 0.015216 | 366  | 0.79     | 0.078183 |      |          |
| 25170_at   | A15g33260 | ATMRK1 - supported by full-length cDN protein kinase, putative (MRK1)                        | 273 | 300 | 389 | 393 | 450 | 358 | 337   | 400  | 0.84     | 0.219544 | 359 | 402  | 364  | 518  | 420  | 408  | 457  | 438  | 375  | 448  | 0.84     | 0.039846 | 448  | 0.84     | 0.125218 |      |          |
| 25171_at   | A15g33220 | putative protein several hypothetical on kexl repeat-contains F-box family or                | 160 | 223 | 221 | 211 | 240 | 199 | 202   | 216  | 0.93     | 0.580618 | 215 | 215  | 211  | 266  | 216  | 200  | 247  | 234  | 214  | 233  | 0.92     | 0.257898 | 228  | 0.94     | 0.516222 |      |          |
| 25172_at   | A15g3190  | putative protein chloroplast ribosome r ribosome recycling factor, chloroplast, s            | 188 | 267 | 231 | 223 | 261 | 187 | 222   | 224  | 0.99     | 0.965194 | 239 | 237  | 225  | 322  | 235  | 252  | 262  | 230  | 234  | 260  | 0.90     | 0.273503 | 270  | 0.87     | 0.253406 |      |          |
| 25173_at   | A15g33270 | o putative protein hypothetical protein A1- expressed protein                                | 111 | 155 | 128 | 162 | 191 | 141 | 141   | 165  | 0.86     | 0.331975 | 143 | 170  | 159  | 221  | 161  | 155  | 158  | 152  | 158  | 170  | 0.93     | 0.530865 | 179  | 0.88     | 0.386928 |      |          |
| 25174_at   | A15g33200 | putative protein latex protein allergen I patatin-related                                    | 202 | 279 | 241 | 390 | 401 | 353 | 241   | 381  | 0.63     | 0.006203 | 223 | 251  | 247  | 373  | 295  | 239  | 268  | 272  | 240  | 289  | 0.83     | 0.164044 | 302  | 0.80     | 0.197130 |      |          |
| 25175_at   | A15g33250 | homocysteine S-methyltransferase A4H homocysteine S-methyltransferase 2 (Hl                  | 514 | 674 | 598 | 690 | 745 | 592 | 595   | 676  | 0.88     | 0.278258 | 648 | 678  | 680  | 915  | 741  | 666  | 738  | 710  | 669  | 754  | 0.89     | 0.185136 | 774  | 0.86     | 0.229710 |      |          |
| 25176_at   | A15g33380 | putative protein nuclear ATPase -like protein calcium-transporting ATPase, plasma m          | 24  | 27  | 29  | 30  | 35  | 30  | 26    | 32   | 0.53     | 0.054710 | 22  | 26   | 26   | 21   | 21   | 24   | 21   | 27   | 25   | 23   | 1.08     | 0.315900 | 22   | 1.12     | 0.135170 |      |          |
| 25177_at   | A15g33400 | cyclochlorin-like protein CDC28cdc2-1l peptidyl-orolvi cis-trans isomerase cyclo             | 401 | 543 | 536 | 530 | 633 | 448 | 493   | 537  | 0.92     | 0.567068 | 389 | 325  | 363  | 502  | 415  | 384  | 554  | 496  | 359  | 470  | 0.76     | 0.043143 | 434  | 0.83     | 0.134756 |      |          |
| 25178_at   | A15g33440 | cytochrome oxidase -like protein cytoxinir FAD-binding domain-contains protein i             | 98  | 142 | 118 | 227 | 259 | 110 | 119   | 232  | 0.51     | 0.004210 | 110 | 96   | 120  | 324  | 232  | 206  | 176  | 183  | 109  | 224  | 0.49     | 0.018884 | 254  | 0.43     | 0.016599 |      |          |
| 25179_at   | A15g33460 | putative protein ABP130 protein. Home VWD-40 repeat family or                                | 467 | 568 | 521 | 648 | 713 | 551 | 519   | 637  | 0.81     | 0.098746 | 314 | 271  | 310  | 368  | 334  | 250  | 398  | 352  | 298  | 340  | 0.88     | 0.271488 | 317  | 0.94     | 0.640447 |      |          |
| 25180_at   | A15g33500 | putative protein predicted protein, Arab expressed protein                                   | 382 | 510 | 550 | 469 | 556 | 417 | 481   | 491  | 0.98     | 0.889333 | 362 | 312  | 424  | 361  | 448  | 426  | 538  | 511  | 471  | 345  | 0.79     | 0.050508 | 404  | 0.85     | 0.191121 |      |          |
| 25181_at   | A15g33520 | neoxanthin cleavage enzyme ncl - p-cis-epoxycarotenoid dioxygenase / ne                      | 423 | 646 | 695 | 609 | 698 | 584 | 588   | 630  | 0.93     | 0.664142 | 514 | 271  | 614  | 914  | 916  | 625  | 573  | 737  | 771  | 715  | 655      | 0.720    | 0.79 | 0.110767 | 705      | 0.80 | 0.277020 |
| 25182_at   | A15g33480 | serin heavy chain - like protein kinas kinesin heavy chain, putative                         | 75  | 101 | 109 | 95  | 98  | 87  | 95    | 93   | 1.02     | 0.878338 | 72  | 86   | 95   | 99   | 87   | 82   | 86   | 87   | 84   | 88   | 0.95     | 0.518759 | 90   | 0.94     | 0.547318 |      |          |
| 25183_at   | A15g33470 | serin carboxypeptidase - like protein c serine carboxypeptidase, putative                    | 28  | 29  | 44  | 47  | 42  | 41  | 34    | 43   | 0.78     | 0.156778 | 28  | 31   | 38   | 32   | 25   | 23   | 27   | 24   | 32   | 26   | 1.24     | 0.092900 | 27   | 1.21     | 0.240656 |      |          |
| 25184_at   | A15g33390 | putative protein predicted protein, Cae expressed protein                                    | 290 | 377 | 416 | 411 | 486 | 383 | 361   | 420  | 0.86     | 0.257993 | 385 | 437  | 389  | 577  | 415  | 424  | 453  | 481  | 457  | 487  | 0.87     | 0.208840 | 472  | 0.85     | 0.277343 |      |          |
| 25185_at   | A15g33420 | putative chloroplast inner envelope protein chloroplast inner envelope membrane or           | 94  | 142 | 790 | 907 | 881 | 791 | 964   | 0.81 | 0.147780 | 980      | 242 | 1020 | 1052 | 1180 | 1524 | 1169 | 1167 | 1080 | 1234 | 1182 | 1.07     | 0.07844  | 1278 | 0.79     | 0.123037 |      |          |
| 25186_at   | A15g33510 | putative protein mRFP3 protein, Azospirillum nitrogen regulation family protein              | 82  | 129 | 95  | 129 | 147 | 111 | 102   | 129  | 0.79     | 0.203836 | 107 | 105  | 108  | 151  | 127  | 118  | 118  | 109  | 107  | 124  | 0.86     | 0.109398 | 132  | 0.81     | 0.062156 |      |          |
| 25187_at   | A15g33490 | chloroplast ribosomal L1 - like protein i ribosomal protein L1 family protein                | 329 | 519 | 474 | 480 | 512 | 439 | 440   | 477  | 0.92     | 0.579630 | 446 | 572  | 572  | 701  | 555  | 520  | 620  | 564  | 530  | 592  | 0.90     | 0.281077 | 592  | 0.90     | 0.423979 |      |          |
| 25188_at   | A15g33420 | putative protein -, supported by cDNA, i heterotrimeric G protein gamma-subunit              | 234 | 422 | 399 | 405 | 452 | 362 | 372   | 407  | 0.91     | 0.458886 | 407 | 403  | 427  | 576  | 435  | 429  | 416  | 395  | 412  | 450  | 0.92     | 0.410187 | 480  | 0.86     | 0.234133 |      |          |
| 25189_at   | A15g31020 | putative protein kinase protein serine/thre protein kinase family protein                    | 640 | 771 | 763 | 795 | 688 | 698 | 627   | 827  | 0.86     | 0.300024 | 739 | 686  | 645  | 945  | 845  | 855  | 867  | 845  | 845  | 865  | 0.91     | 0.072142 | 844  | 0.81     | 0.065082 |      |          |
| 25190_at   | A15g31030 | putative protein predicted protein, Ara expressed protein                                    | 178 | 226 | 227 | 267 | 297 | 228 | 210   | 264  | 0.80     | 0.103759 | 197 | 149  | 154  | 283  | 237  | 189  | 299  | 293  | 267  | 280  | 0.64     | 0.020660 | 236  | 0.70     | 0.089608 |      |          |
| 25191_at   | A15g31040 | laccase -like protein lac110 laccase, P laccase family protein / dihenol oxidase             | 209 | 154 | 146 | 188 | 259 | 204 | 170   | 217  | 0.78     | 0.185598 | 25  | 22   | 25   | 33   | 24   | 34   | 34   | 34   | 34   | 34   | 0.72     | 0.020405 | 32   | 0.77     | 0.032286 |      |          |
| 25192_at   | A15g31060 | putative protein - kinase protein kinase protein kinase family protein                       | 26  | 29  | 35  | 38  | 38  | 38  | 30    | 38   | 0.80     | 0.049312 | 26  | 25   | 29   | 29   | 29   | 27   | 25   | 30   | 28   | 27   | 0.97     | 0.531348 | 27   | 0.99     | 0.887646 |      |          |
| 25193_at   | A15g31070 | putative protein various predicted protein zinc finger (C3HC4-type RING finger) fa           | 19  | 23  | 19  | 23  | 32  | 32  | 32    | 32   | 0.73     | 0.147600 | 16  | 23   | 16   | 20   | 17   | 16   | 23   | 18   | 21   | 19   | 1.14     | 0.256982 | 18   | 1.21     | 0.256970 |      |          |
| 25194_at   | A15g31080 | putative protein predicted protein, Arab hypothetical protein                                | 31  | 44  | 40  | 43  | 56  | 41  | 38    | 47   | 0.82     | 0.229897 | 29  | 35   | 32   | 36   | 28   | 33   | 34   | 34   | 32   | 33   | 0.96     | 0.572946 | 32   | 0.98     | 0.820600 |      |          |
| 25195_at   | A15g31110 | putative protein cro1 protein, Zea mays pentatricopeptide (PPR) repeat-contains              | 53  | 62  | 67  | 73  | 72  | 69  | 61    | 71   | 0.85     | 0.066128 | 43  | 42   | 53   | 57   | 43   | 42   | 60   | 49   | 46   | 50   | 0.92     | 0.481604 | 48   | 0.97     | 0.826016 |      |          |
| 25196_at   | A15g31150 | putative protein predicted protein, Arab hypothetical protein                                | 34  | 31  | 42  | 33  | 42  | 35  | 36    | 37   | 0.97     | 0.791730 | 30  | 27   | 33   | 31   | 24   | 27   | 27   | 27   | 27   | 30   | 1.09     | 0.227168 | 27   | 1.09     | 0.384976 |      |          |
| 25197_at   | A15g31300 | oligopeptide transporter - like protein o proton-dependent oligopeptide transport            | 176 | 135 | 185 | 296 | 169 | 184 | 166   | 219  | 0.75     | 0.265562 | 209 | 194  | 246  | 275  | 236  | 185  | 174  | 186  | 175  | 263  | 1.45     | 0.015140 | 182  | 1.45     | 0.070275 |      |          |
| 25198_at   | A15g31190 | laccase - like protein laccase precursor laccase, putative / dihenol oxidase, put            | 41  | 47  | 52  | 48  | 48  | 52  | 46    | 101  | 0.92     | 0.22175  | 46  | 36   | 43   | 38   | 39   | 40   | 38   | 43   | 38   | 40   | 0.87     | 0.043424 | 38   | 0.87     | 0.043424 |      |          |
| 25199_at   | A15g31200 | putative protein Myb-related transcript mly family transcription factor                      | 54  | 67  | 98  | 79  | 87  | 75  | 73    | 80   | 0.91     | 0.616863 | 175 | 198  | 214  | 198  | 214  | 168  | 211  | 189  | 196  | 187  | 1.04     | 0.568781 | 179  | 1.09     | 0.329254 |      |          |
| 25200_at   | A15g31240 | LAX1 / AUX1 -like permease amino acid permease, putative                                     | 202 | 297 | 285 | 234 | 304 | 200 | 261   | 246  | 1.06     | 0.741917 | 207 | 214  | 179  | 171  | 136  | 141  | 209  | 198  | 200  | 171  | 1.17     | 0.220980 | 149  | 1.34     | 0.039092 |      |          |
| 25201_at   | A15g31270 | hypothetical protein RNA polymerase I double-stranded RNA-binding domain (C                  | 128 | 188 | 164 | 209 | 245 | 185 | 160   | 213  | 0.75     | 0.098799 | 135 | 102  | 140  | 177  | 163  | 129  | 112  | 118  | 126  | 140  | 0.90     | 0.453629 | 156  | 0.80     | 0.173584 |      |          |
| 25202_at   | A15g31280 | putative protein prochlorococcus - expressed protein                                         | 25  | 21  | 25  | 26  | 27  | 23  | 21    | 25   | 0.62     | 0.172274 | 24  | 24   | 22   | 20   | 22   | 19   | 20   | 20   | 20   | 20   | 1.07     | 0.604424 | 18   | 1.19     | 0.216014 |      |          |
| 25203_at   | A15g31290 | mRNA capping enzyme - like protein m mRNA capping enzyme family protein                      | 193 | 254 | 235 | 247 | 276 | 223 | 227</ |      |          |          |     |      |      |      |      |      |      |      |      |      |          |          |      |          |          |      |          |

|           |           |                                                                                        |      |      |      |      |      |      |      |      |          |          |      |      |      |      |      |      |      |      |      |      |      |          |      |      |          |
|-----------|-----------|----------------------------------------------------------------------------------------|------|------|------|------|------|------|------|------|----------|----------|------|------|------|------|------|------|------|------|------|------|------|----------|------|------|----------|
| 251061_at | A15g01830 | putative protein hypothetical protein A1 armadillo/beta-catenin repeat family prot     | 37   | 38   | 46   | 51   | 60   | 47   | 40   | 53   | 0.76     | 0.057793 | 26   | 31   | 37   | 34   | 30   | 26   | 44   | 38   | 31   | 34   | 0.91 | 0.535619 | 30   | 1.05 | 0.739609 |
| 251062_at | A15g01840 | putative protein putative proteins - Arat ovate family protein                         | 438  | 480  | 513  | 498  | 617  | 509  | 477  | 541  | 0.88     | 0.215217 | 415  | 445  | 463  | 593  | 449  | 385  | 420  | 431  | 441  | 456  | 0.97 | 0.772172 | 476  | 0.93 | 0.610286 |
| 251063_at | A15g01850 | protein kinase ATN1-like protein kinase protein kinases, putative                      | 148  | 183  | 196  | 219  | 256  | 205  | 175  | 228  | 0.77     | 0.071520 | 130  | 154  | 143  | 241  | 197  | 204  | 222  | 216  | 242  | 216  | 0.86 | 0.000681 | 214  | 0.87 | 0.000975 |
| 251064_at | A15g01860 | putative zinc finger protein several zinc zinc finger (C2H2 type) family protein       | 34   | 39   | 43   | 34   | 37   | 31   | 37   | 34   | 1.00     | 0.402626 | 28   | 35   | 34   | 22   | 33   | 25   | 34   | 22   | 33   | 25   | 1.45 | 0.003070 | 23   | 1.45 | 0.003070 |
| 251065_at | A15g01870 | lipid-transfer protein-like lipid-transfer ( lipid transfer protein, putative          | 289  | 307  | 301  | 1140 | 1155 | 1122 | 396  | 1139 | 0.35     | 0.000276 | 1478 | 1630 | 1541 | 1299 | 1017 | 976  | 1221 | 1144 | 1550 | 1132 | 1.37 | 0.002995 | 1098 | 1.41 | 0.015075 |
| 251066_at | A15g01880 | putative protein RING-H2 finger protein zinc finger (C3HC4-type RING finger) fa        | 118  | 166  | 266  | 156  | 201  | 149  | 183  | 169  | 1.00     | 0.772540 | 299  | 466  | 266  | 394  | 277  | 287  | 421  | 397  | 344  | 355  | 0.97 | 0.859665 | 319  | 1.08 | 0.750305 |
| 251067_at | A15g01910 | hypothetical protein                                                                   | 118  | 158  | 125  | 141  | 139  | 139  | 134  | 140  | 0.96     | 0.866639 | 155  | 163  | 163  | 225  | 185  | 178  | 157  | 157  | 157  | 180  | 0.87 | 0.221122 | 189  | 0.83 | 0.195656 |
| 251068_at | A15g01920 | putative protein several protein kinases, putative                                     | 136  | 166  | 171  | 148  | 167  | 136  | 144  | 156  | 1.00     | 0.864554 | 136  | 153  | 163  | 127  | 157  | 138  | 157  | 138  | 157  | 149  | 0.82 | 0.343459 | 149  | 0.82 | 0.257562 |
| 251069_at | A15g01930 | (1-4)-beta-mannan endoglucanase-like (1-4)-beta-mannan endoglucanase, outase           | 27   | 40   | 39   | 60   | 70   | 52   | 35   | 61   | 0.58     | 0.198599 | 41   | 36   | 38   | 66   | 44   | 59   | 56   | 39   | 38   | 53   | 0.73 | 0.074201 | 57   | 0.68 | 0.052781 |
| 251070_at | A15g01940 | translation initiation factor eIF-2 beta c eukaryotic translation initiation factor 2B | 94   | 135  | 163  | 157  | 176  | 123  | 131  | 152  | 0.86     | 0.445200 | 173  | 176  | 164  | 258  | 177  | 219  | 204  | 182  | 171  | 208  | 0.82 | 0.110906 | 218  | 0.78 | 0.119464 |
| 251071_at | A15g01950 | putative protein receptor protein kinase leucine repeat transmembrane prot             | 208  | 226  | 223  | 245  | 295  | 223  | 219  | 254  | 0.86     | 0.185786 | 229  | 207  | 238  | 275  | 254  | 223  | 316  | 299  | 225  | 274  | 0.82 | 0.077036 | 251  | 0.90 | 0.211913 |
| 251072_at | A15g01740 | putative protein wound-inducible orote expressed protein                               | 47   | 39   | 54   | 45   | 53   | 44   | 47   | 47   | 0.99     | 0.822826 | 37   | 50   | 42   | 39   | 53   | 41   | 47   | 46   | 43   | 41   | 1.05 | 0.647416 | 37   | 1.10 | 0.237149 |
| 251073_at | A15g01750 | putative protein hypothetical proteins -, expressed protein                            | 558  | 741  | 845  | 714  | 903  | 587  | 714  | 735  | 0.97     | 0.002762 | 1339 | 1792 | 1275 | 1650 | 1421 | 1446 | 1873 | 1753 | 1469 | 1628 | 0.90 | 0.373893 | 1505 | 0.98 | 0.846912 |
| 251074_at | A15g01800 | putative protein hypothetical protein T1 saponin B domain-containing protein           | 302  | 374  | 396  | 381  | 455  | 352  | 357  | 396  | 0.90     | 0.407698 | 413  | 433  | 390  | 577  | 536  | 459  | 488  | 466  | 412  | 505  | 0.82 | 0.024648 | 524  | 0.79 | 0.038051 |
| 251075_at | A15g01890 | putative protein leucine-rich receptor-li leucine-rich repeat transmembrane prot       | 501  | 566  | 525  | 573  | 659  | 543  | 531  | 591  | 0.90     | 0.200338 | 467  | 434  | 491  | 624  | 498  | 433  | 509  | 495  | 464  | 512  | 0.91 | 0.306717 | 518  | 0.89 | 0.402722 |
| 251076_at | A15g01970 | putative protein ovalute protein A2a23 expressed protein                               | 262  | 330  | 322  | 358  | 430  | 302  | 305  | 363  | 0.84     | 0.244613 | 381  | 342  | 450  | 492  | 491  | 415  | 429  | 439  | 391  | 453  | 0.86 | 0.094220 | 466  | 0.84 | 0.136311 |
| 251077_at | A15g01980 | putative protein COP-1-interacting prot zinc finger (C3HC4-type RING finger) fa        | 254  | 402  | 392  | 466  | 543  | 327  | 314  | 471  | 0.79     | 0.105802 | 452  | 396  | 424  | 505  | 402  | 493  | 451  | 501  | 451  | 501  | 0.83 | 0.040797 | 520  | 0.80 | 0.091855 |
| 251078_at | A15g01990 | putative protein hypothetical proteins -, auxin efflux carrier family protein          | 141  | 203  | 219  | 295  | 361  | 251  | 188  | 302  | 0.62     | 0.045033 | 159  | 142  | 177  | 234  | 206  | 183  | 236  | 239  | 160  | 220  | 0.73 | 0.099597 | 208  | 0.77 | 0.053086 |
| 251079_at | A15g02000 | hypothetical protein                                                                   | 48   | 53   | 62   | 59   | 60   | 61   | 55   | 60   | 0.91     | 0.284619 | 38   | 37   | 50   | 43   | 35   | 44   | 48   | 45   | 42   | 43   | 0.97 | 0.775550 | 41   | 1.02 | 0.863024 |
| 251080_at | A15g02010 | putative protein hypothetical proteins -, expressed protein                            | 94   | 122  | 110  | 130  | 127  | 107  | 109  | 121  | 0.90     | 0.317487 | 83   | 77   | 100  | 133  | 115  | 98   | 117  | 109  | 87   | 114  | 0.76 | 0.022868 | 115  | 0.75 | 0.080572 |
| 251081_at | A15g02070 | putative protein kinase wall-associated protein kinase-related                         | 15   | 8    | 11   | 10   | 12   | 15   | 11   | 12   | 0.94     | 0.794723 | 8    | 8    | 11   | 12   | 8    | 9    | 12   | 9    | 10   | 10   | 0.94 | 0.658950 | 9    | 0.99 | 0.931323 |
| 251021_at | A15g02140 | thumatin-like protein thumatin-like o thumatin-like protein, putative                  | 80   | 102  | 117  | 149  | 160  | 123  | 100  | 144  | 0.69     | 0.044790 | 135  | 131  | 143  | 250  | 176  | 189  | 160  | 163  | 136  | 188  | 0.73 | 0.058102 | 205  | 0.67 | 0.040732 |
| 251022_at | A15g02150 | putative protein Hs070 bindin protein expressed protein                                | 130  | 199  | 202  | 143  | 174  | 119  | 177  | 146  | 1.22     | 0.331854 | 174  | 210  | 171  | 229  | 162  | 194  | 212  | 210  | 185  | 201  | 0.92 | 0.386881 | 195  | 0.95 | 0.685651 |
| 251023_at | A15g02170 | putative protein amino acid transport o amino acid transporter family protein          | 18   | 26   | 30   | 30   | 31   | 29   | 25   | 30   | 0.82     | 0.180625 | 35   | 34   | 38   | 41   | 35   | 30   | 42   | 45   | 36   | 39   | 0.92 | 0.437274 | 35   | 1.01 | 0.932004 |
| 251024_at | A15g02180 | putative protein hypothetical proteins -, amino acid transporter family protein        | 40   | 45   | 62   | 56   | 46   | 50   | 49   | 51   | 0.96     | 0.801374 | 37   | 39   | 50   | 52   | 36   | 39   | 53   | 52   | 42   | 46   | 0.91 | 0.494148 | 42   | 1.00 | 0.997163 |
| 251025_at | A15g02190 | putative protein CND41, chloroplast n aspartyl protease family protein                 | 88   | 102  | 100  | 155  | 171  | 131  | 97   | 152  | 0.64     | 0.011363 | 144  | 129  | 148  | 227  | 169  | 160  | 207  | 195  | 140  | 192  | 0.73 | 0.021877 | 185  | 0.76 | 0.104095 |
| 251026_at | A15g02200 | hypothetical protein                                                                   | 33   | 38   | 55   | 62   | 56   | 57   | 42   | 59   | 0.72     | 0.079437 | 37   | 35   | 42   | 75   | 61   | 78   | 59   | 55   | 38   | 66   | 0.58 | 0.004942 | 71   | 0.53 | 0.004675 |
| 251027_at | A15g02210 | putative protein hypothetical protein F7 phytochrome                                   | 15   | 15   | 24   | 15   | 21   | 25   | 18   | 20   | 0.89     | 0.596592 | 22   | 24   | 29   | 35   | 27   | 24   | 39   | 39   | 25   | 33   | 0.76 | 0.122612 | 29   | 0.87 | 0.383286 |
| 251028_at | A15g02230 | putative protein ovalute hydrolase A2c halacid dehalocyanase-like hydrolase fa         | 314  | 360  | 561  | 316  | 314  | 263  | 384  | 298  | 1.32     | 0.322397 | 925  | 1157 | 667  | 1027 | 840  | 911  | 1374 | 1401 | 916  | 1091 | 0.84 | 0.142615 | 883  | 1.03 | 0.886213 |
| 251029_at | A15g02420 | putative protein gene product of sukar mitochondrial cytochrome c oxidase              | 569  | 603  | 748  | 782  | 656  | 595  | 731  | 0.77 | 0.027862 | 511      | 625  | 625  | 571  | 571  | 571  | 565  | 591  | 626  | 591  | 626  | 0.92 | 0.640422 | 663  | 0.89 | 0.495301 |
| 251030_at | A15g02130 | putative protein kinesin light chain - PII expressed protein                           | 128  | 170  | 153  | 168  | 203  | 142  | 150  | 171  | 0.88     | 0.389995 | 142  | 150  | 145  | 214  | 181  | 168  | 171  | 169  | 146  | 181  | 0.81 | 0.024569 | 188  | 0.78 | 0.039875 |
| 251031_at | A15g02120 | one helix protein (OHP) - supported by thylakoid membrane one helix protein (C         | 314  | 519  | 478  | 453  | 410  | 376  | 437  | 413  | 1.06     | 0.738132 | 385  | 452  | 508  | 764  | 554  | 454  | 519  | 489  | 448  | 556  | 0.86 | 0.213138 | 591  | 0.76 | 0.220651 |
| 251032_at | A15g02030 | putative protein homeodomain protein several homeodomain protein (BELLRINGER)          | 645  | 889  | 839  | 1043 | 1161 | 866  | 791  | 1023 | 0.77     | 0.109860 | 790  | 648  | 797  | 1105 | 932  | 814  | 1058 | 1034 | 745  | 989  | 0.75 | 0.020288 | 950  | 0.78 | 0.102480 |
| 251033_at | A15g02040 | hypothetical protein - supported by full-zinc finger (C3HC4-type RING finger) fa       | 327  | 406  | 423  | 466  | 543  | 327  | 314  | 471  | 0.79     | 0.105802 | 452  | 396  | 424  | 505  | 402  | 493  | 451  | 501  | 451  | 501  | 0.83 | 0.040797 | 520  | 0.80 | 0.091855 |
| 251034_at | A15g02040 | putative protein - supported by full-length overexpressed rab acceptor (PRA1) family o | 188  | 220  | 223  | 242  | 284  | 221  | 201  | 249  | 0.81     | 0.158006 | 200  | 245  | 230  | 337  | 273  | 284  | 260  | 226  | 225  | 276  | 0.82 | 0.098766 | 298  | 0.76 | 0.038104 |
| 251035_at | A15g02220 | Expressed protein - supported by full-length expressed protein                         | 85   | 111  | 96   | 115  | 106  | 94   | 106  | 89   | 0.83     | 0.312173 | 97   | 90   | 102  | 108  | 85   | 86   | 93   | 93   | 96   | 93   | 1.04 | 0.573416 | 93   | 1.04 | 0.684290 |
| 251036_at | A15g02160 | putative protein - supported by CND4, expressed protein                                | 360  | 671  | 766  | 336  | 539  | 316  | 599  | 397  | 1.51     | 0.228057 | 533  | 753  | 494  | 613  | 555  | 603  | 652  | 617  | 593  | 608  | 0.88 | 0.823133 | 590  | 1.01 | 0.972395 |
| 251037_at | A15g02150 | putative protein histone-binding protein o xyloridin-binding family protein            | 98   | 117  | 134  | 125  | 141  | 116  | 115  | 125  | 0.93     | 0.550951 | 67   | 48   | 66   | 83   | 55   | 60   | 68   | 58   | 60   | 65   | 0.92 | 0.569527 | 66   | 0.91 | 0.605056 |
| 251038_at | A15g02240 | putative protein unknown protein A2a70, expressed protein                              | 1731 | 1938 | 2078 | 2293 | 2628 | 2237 | 1916 | 2386 | 0.80     | 0.040962 | 2323 | 2363 | 2562 | 2947 | 2564 | 2630 | 2752 | 2416 | 2684 | 2972 | 0.90 | 0.110535 | 2627 | 0.92 | 0.318156 |
| 251039_at | A15g02200 | putative protein hypothetical protein TE expressed protein                             | 154  | 263  | 508  | 208  | 194  | 153  | 308  | 185  | 1.67     | 0.309903 | 266  | 275  | 236  | 247  | 187  | 212  | 237  | 224  | 259  | 221  | 1.17 | 0.058747 | 215  | 1.20 | 0.103588 |
| 251040_at | A15g02250 | ribonuclease II-like protein ribonuclease ribonuclease II family protein               | 111  | 175  | 176  | 148  | 174  | 126  | 154  | 149  | 1.03     | 0.855549 | 108  | 98   | 125  | 129  | 112  | 100  | 106  | 109  | 109  | 111  | 0.98 | 0.831804 | 114  | 0.96 | 0.720484 |
| 251041_at | A15g02300 | ubiquitin-protein ligase E3-alpha-like c ceriferum3 protein, putative                  | 102  | 101  | 62   | 109  | 126  | 149  | 108  | 81   | 1.28     | 0.045213 | 30   | 23   | 31   | 29   | 24   | 28   | 35   | 30   | 28   | 29   | 0.87 | 0.797360 | 26   | 0.97 | 0.571681 |
| 251042_at | A15g02310 | ceriferum3 (CER3) protein                                                              | 433  | 593  | 654  | 654  | 654  | 654  | 654  | 654  | 0.84     | 0.253805 | 393  | 428  | 435  | 435  | 435  | 435  | 435  | 435  | 435  | 435  | 0.81 | 0.020963 | 469  | 0.80 | 0.020963 |
| 251043_at | A15g02330 | putative protein various predicted prot DC1 domain-containing protein /// DC1 c        | 10   | 11   | 14   | 8    | 13   | 9    | 12   | 10   | 1.18     | 0.391777 | 4    | 7    | 8    | 8    | 5    | 6    | 9    | 12   | 6    | 8    | 0.79 | 0.041906 | 6    | 1.01 | 0.964612 |
| 251044_at | A15g02350 | putative protein various predicted prot DC1 domain-containing protein                  | 19   | 21   | 31   | 31   | 34   | 28   | 24   | 31   | 0.77     | 0.154999 | 24   | 25   | 22   | 21   | 21   | 19   | 20   | 23   | 24   | 21   | 1.14 | 0.042030 | 20   | 1.16 | 0.024763 |
| 251045_at | A15g02360 | putative protein various predicted prot pseudodone, CPH-rich zinc finger protein       | 6    | 4    | 3    | 3    | 4    | 4    | 4    | 3    | 1.52     | 0.285048 | 2    | 2    | 4    | 4    | 5    | 8    | 4    | 6    | 3    | 5    | 0.51 | 0.051605 | 6    | 0.48 | 0.092829 |
| 251046_at | A15g02370 | kinesin -like protein kinesin, Xenopus I kinesin motor protein-related                 | 87   | 110  | 93   | 112  | 132  | 100  | 96   | 115  | 0.84     | 0.192387 | 77   | 83   | 85   | 117  | 85   | 88   | 94   | 86   | 88   | 94   | 0.86 | 0.151718 | 99   | 0.82 | 0.151880 |
| 251047_at | A15g02390 | putative protein mature-parasite-infects expressed protein                             | 18   | 22   | 21   | 23   | 25   |      |      |      |          |          |      |      |      |      |      |      |      |      |      |      |      |          |      |      |          |

|             |           |                                                                                       |      |      |      |      |      |      |      |          |          |          |          |      |      |      |      |      |      |      |      |      |          |          |          |          |          |          |
|-------------|-----------|---------------------------------------------------------------------------------------|------|------|------|------|------|------|------|----------|----------|----------|----------|------|------|------|------|------|------|------|------|------|----------|----------|----------|----------|----------|----------|
| 250966_at   | A15g02910 | putative protein various predicted prot F-box family protein                          | 114  | 137  | 153  | 181  | 199  | 139  | 134  | 173      | 0.78     | 0.142681 | 106      | 110  | 134  | 203  | 158  | 145  | 174  | 164  | 116  | 169  | 0.69     | 0.011537 | 1168     | 0.69     | 0.058193 |          |
| 250967_at   | A15g02790 | putative protein In2, Zee mayas, EMBL: in2-1 protein, putative                        | 408  | 594  | 596  | 832  | 855  | 717  | 533  | 801      | 0.66     | 0.023693 | 836      | 880  | 951  | 1407 | 1050 | 977  | 1122 | 1013 | 889  | 1114 | 0.80     | 0.078060 | 1445     | 0.78     | 0.135737 |          |
| 250968_at   | A15g02890 | putative protein : supported by full-length transferase family protein                | 97   | 112  | 99   | 107  | 108  | 110  | 103  | 108      | 0.95     | 0.306937 | 82       | 103  | 120  | 120  | 76   | 81   | 83   | 89   | 102  | 90   | 1.13     | 0.417274 | 93       | 1.10     | 0.645709 |          |
| 250969_at   | A15g04700 | putative protein : supported by full-length expressed protein                         | 348  | 447  | 439  | 561  | 574  | 530  | 411  | 551      | 0.74     | 0.213708 | 433      | 561  | 534  | 636  | 54   | 61   | 85   | 436  | 604  | 519  | 0.85     | 0.325148 | 636      | 0.85     | 0.325591 |          |
| 250970_at   | A15g02770 | putative protein : supported by cDNA : expressed protein                              | 480  | 767  | 606  | 870  | 960  | 860  | 618  | 897      | 0.69     | 0.035015 | 410      | 405  | 380  | 660  | 467  | 504  | 532  | 518  | 398  | 536  | 0.74     | 0.020443 | 544      | 0.73     | 0.071738 |          |
| 250971_at   | A15g02810 | putative protein AB3-interacting prot pseudo-response regulator 7 (APRR7)             | 299  | 449  | 441  | 387  | 455  | 329  | 396  | 390      | 1.02     | 0.924803 | 256      | 247  | 260  | 317  | 254  | 217  | 283  | 286  | 254  | 271  | 0.94     | 0.478769 | 263      | 0.97     | 0.791194 |          |
| 250972_at   | A15g02840 | putative protein various MvB related or myb family transcription factor               | 193  | 392  | 478  | 243  | 280  | 177  | 354  | 234      | 1.52     | 0.249774 | 254      | 325  | 270  | 422  | 293  | 214  | 349  | 333  | 283  | 342  | 0.83     | 0.124814 | 343      | 0.82     | 0.255585 |          |
| 250973_at   | A15g02860 | putative protein - like B56 ribosomal protein L45, 1 (RPL4D)                          | 2970 | 3312 | 3096 | 3947 | 3267 | 3138 | 3667 | 0.159708 | 2948     | 3158     | 2575     | 3486 | 3162 | 2760 | 3162 | 2760 | 3162 | 3162 | 3162 | 3162 | 0.83     | 0.036887 | 3162     | 0.83     | 0.284111 |          |
| 250974_at   | A15g02820 | meiosis specific - like protein Soc11, N. DNA topoisomerase VIA (SPO11)               | 130  | 173  | 171  | 187  | 180  | 165  | 158  | 178      | 0.80     | 0.289036 | 126      | 131  | 144  | 189  | 150  | 132  | 171  | 162  | 134  | 161  | 0.83     | 0.086044 | 157      | 0.85     | 0.250708 |          |
| 250975_at   | A15g03050 | putative protein : expressed protein                                                  | 135  | 157  | 178  | 242  | 275  | 187  | 157  | 157      | 0.67     | 0.056206 | 155      | 156  | 162  | 337  | 253  | 257  | 235  | 158  | 261  | 0.60 | 0.008317 | 282      | 0.56     | 0.010656 |          |          |
| 250976_at   | A15g03060 | putative protein various predicted orote expressed protein                            | 39   | 55   | 51   | 63   | 73   | 60   | 48   | 65       | 0.74     | 0.052843 | 30       | 37   | 41   | 55   | 44   | 37   | 41   | 37   | 36   | 43   | 0.84     | 0.223241 | 45       | 0.80     | 0.205676 |          |
| 250977_at   | A15g03070 | inormfin alpha - like protein inormfin alI ammadolbeta-catenin recsept family prot    | 138  | 195  | 209  | 222  | 242  | 198  | 181  | 211      | 0.82     | 0.186818 | 141      | 149  | 162  | 206  | 156  | 163  | 169  | 153  | 151  | 169  | 0.89     | 0.218610 | 175      | 0.86     | 0.220868 |          |
| 250978_at   | A15g03080 | putative protein contains transmembra phospholipid acid phosphatase-related /         | 184  | 230  | 288  | 277  | 328  | 258  | 244  | 281      | 0.87     | 0.058856 | 236      | 242  | 241  | 365  | 270  | 240  | 278  | 240  | 235  | 240  | 0.86     | 0.236881 | 304      | 0.79     | 0.100144 |          |
| 250979_at   | A15g03090 | putative protein : hypothetical protein                                               | 58   | 84   | 84   | 92   | 96   | 90   | 75   | 93       | 0.81     | 0.123058 | 32       | 30   | 38   | 43   | 30   | 36   | 35   | 35   | 33   | 36   | 0.92     | 0.441806 | 37       | 0.91     | 0.497842 |          |
| 250980_at   | A15g03130 | putative protein : hypothetical protein                                               | 16   | 19   | 22   | 22   | 26   | 22   | 19   | 23       | 0.82     | 0.148057 | 12       | 13   | 15   | 18   | 11   | 14   | 14   | 17   | 13   | 15   | 0.90     | 0.430642 | 15       | 0.92     | 0.634545 |          |
| 250981_at   | A15g03140 | receptor like protein kinase receptor IiI lectin protein kinase family protein        | 142  | 214  | 217  | 249  | 268  | 212  | 191  | 243      | 0.79     | 0.153418 | 155      | 132  | 172  | 230  | 183  | 162  | 180  | 183  | 153  | 188  | 0.81     | 0.089594 | 192      | 0.80     | 0.165306 |          |
| 250982_at   | A15g03150 | putative protein zinc finger protein, Ars zinc finger (C2H2 type) family protein      | 230  | 241  | 247  | 365  | 373  | 294  | 239  | 344      | 0.76     | 0.015427 | 231      | 262  | 241  | 459  | 338  | 318  | 318  | 318  | 318  | 335  | 0.95     | 0.701510 | 320      | 1.00     | 0.984022 |          |
| 250985_at   | A15g03190 | putative protein various predicted protI expressed protein                            | 143  | 146  | 199  | 207  | 227  | 176  | 163  | 203      | 0.80     | 0.162192 | 92       | 78   | 105  | 157  | 128  | 108  | 161  | 143  | 92   | 139  | 0.66     | 0.014603 | 131      | 0.70     | 0.069783 |          |
| 250986_at   | A15g03210 | putative protein : expressed protein                                                  | 58   | 62   | 86   | 73   | 79   | 61   | 69   | 71       | 0.97     | 0.819007 | 43       | 45   | 62   | 49   | 43   | 54   | 43   | 54   | 43   | 50   | 47       | 1.07     | 0.581829 | 46       | 1.09     | 0.546353 |
| 250987_at   | A15g03250 | photoreceptor-interacting protein - like photoelectric-responsive NPH3 family pro     | 62   | 91   | 87   | 84   | 120  | 85   | 83   | 96       | 0.87     | 0.472743 | 57       | 57   | 70   | 81   | 64   | 69   | 80   | 74   | 61   | 73   | 0.83     | 0.053244 | 71       | 0.86     | 0.208646 |          |
| 250988_at   | A15g03260 | laccase precursor - like laccase precur laccase, putative / diphenol oxidase, put     | 129  | 144  | 184  | 181  | 194  | 180  | 152  | 185      | 0.82     | 0.123482 | 124      | 98   | 137  | 142  | 109  | 119  | 132  | 148  | 119  | 130  | 0.92     | 0.441419 | 123      | 0.97     | 0.812940 |          |
| 250992_at   | A15g03270 | putative protein : like protein lvsir expressed protein                               | 33   | 49   | 72   | 74   | 70   | 65   | 51   | 70       | 0.73     | 0.186211 | 38       | 37   | 37   | 42   | 28   | 35   | 49   | 47   | 37   | 40   | 0.93     | 0.609273 | 35       | 1.07     | 0.604975 |          |
| 250998_at   | A15g02820 | putative protein : ethylene-insensitive 2 (EIN2)                                      | 206  | 279  | 251  | 329  | 351  | 250  | 245  | 310      | 0.79     | 0.160503 | 167      | 136  | 168  | 220  | 188  | 165  | 192  | 180  | 157  | 188  | 0.82     | 0.015337 | 190      | 0.82     | 0.152833 |          |
| 250999_at   | A15g03290 | putative protein : supported by cDNA : isocitrate dehydrogenase, putative / NAI       | 397  | 489  | 546  | 553  | 594  | 460  | 477  | 536      | 0.88     | 0.377526 | 446      | 515  | 495  | 647  | 516  | 492  | 473  | 512  | 485  | 528  | 0.92     | 0.366924 | 552      | 0.88     | 0.273498 |          |
| 250999_at   | A15g03160 | putative protein PSB protein, Bos primi DNA1 heat shock N-terminal domain-co          | 299  | 301  | 399  | 383  | 383  | 384  | 333  | 383      | 0.87     | 0.201089 | 295      | 275  | 388  | 318  | 260  | 356  | 356  | 319  | 335  | 335  | 0.95     | 0.701510 | 320      | 1.00     | 0.984022 |          |
| 250999_at   | A15g03200 | putative protein various predicted prot zinc finger (C3HC4-type RING finger) fa       | 42   | 43   | 56   | 45   | 53   | 52   | 47   | 50       | 0.93     | 0.550516 | 47       | 55   | 54   | 52   | 47   | 43   | 54   | 50   | 52   | 49   | 1.06     | 0.392028 | 47       | 1.11     | 0.206885 |          |
| 250999_s_at | A15g03220 | putative protein MED7, Homo sapiens, transcriptional co-activator-related IIII tra    | 182  | 247  | 266  | 271  | 297  | 224  | 232  | 264      | 0.88     | 0.384315 | 236      | 300  | 250  | 363  | 295  | 294  | 292  | 280  | 262  | 305  | 0.86     | 0.127622 | 317      | 0.82     | 0.136992 |          |
| 250993_at   | A15g03170 | putative protein : like arabinoside DNA1 heat shock N-terminal domain-co              | 74   | 73   | 81   | 89   | 128  | 99   | 76   | 105      | 0.72     | 0.070600 | 43       | 43   | 48   | 61   | 49   | 46   | 40   | 44   | 44   | 48   | 0.92     | 0.480864 | 52       | 0.85     | 0.199746 |          |
| 250994_at   | A15g03030 | DNA1 protein - like DNA1 domain-co DNA1 heat shock N-terminal domain-co               | 216  | 257  | 280  | 348  | 389  | 315  | 251  | 351      | 0.72     | 0.024389 | 297      | 331  | 322  | 445  | 366  | 349  | 355  | 312  | 317  | 365  | 0.87     | 0.154260 | 387      | 0.82     | 0.087609 |          |
| 250995_at   | A15g03120 | putative protein (UBQ2) identical to G122 polyubiquitin (UBQ2) IIII polyubiquitin (LI | 14   | 16   | 14   | 14   | 19   | 16   | 15   | 16       | 0.89     | 0.329561 | 15       | 15   | 15   | 15   | 15   | 15   | 9    | 11   | 15   | 13   | 1.11     | 0.494731 | 16       | 0.95     | 0.363755 |          |
| 250993_at   | A15g03230 | putative protein various predicted prot expressed protein                             | 142  | 103  | 99   | 72   | 80   | 88   | 70   | 125      | 0.293634 | 56       | 88       | 68   | 94   | 81   | 80   | 89   | 78   | 71   | 84   | 0.84 | 0.144972 | 85       | 0.83     | 0.248307 |          |          |
| 250998_at   | A15g03180 | putative protein various predicted prot zinc finger (C3HC4-type RING finger) fa       | 14   | 202  | 251  | 214  | 240  | 169  | 199  | 208      | 0.96     | 0.835280 | 153      | 166  | 154  | 239  | 203  | 187  | 219  | 213  | 158  | 212  | 0.74     | 0.033629 | 210      | 0.75     | 0.030351 |          |
| 250999_at   | A15g03210 | putative protein : various predicted prot calmodulin-binding family protein           | 14   | 103  | 241  | 247  | 365  | 373  | 294  | 239      | 344      | 0.76     | 0.015427 | 231  | 262  | 241  | 459  | 338  | 318  | 318  | 318  | 335  | 0.95     | 0.701510 | 320      | 1.00     | 0.984022 |          |
| 250940_at   | A15g03310 | putative protein : hypothetical protein                                               | 13   | 17   | 19   | 20   | 15   | 17   | 16   | 17       | 0.94     | 0.689552 | 14       | 16   | 23   | 15   | 12   | 10   | 17   | 19   | 17   | 15   | 1.18     | 0.392059 | 13       | 1.39     | 0.186527 |          |
| 250941_at   | A15g03320 | putative protein : protein kinase, putative                                           | 84   | 140  | 117  | 78   | 91   | 72   | 114  | 80       | 1.42     | 0.120022 | 85       | 92   | 85   | 109  | 82   | 79   | 102  | 94   | 87   | 93   | 0.94     | 0.474736 | 90       | 0.97     | 0.790185 |          |
| 250942_at   | A15g03350 | putative protein : legume lectin family protein                                       | 53   | 59   | 56   | 64   | 63   | 62   | 56   | 63       | 0.88     | 0.018162 | 39       | 55   | 67   | 52   | 40   | 43   | 52   | 54   | 54   | 54   | 1.12     | 0.438646 | 45       | 1.20     | 0.361221 |          |
| 250943_at   | A15g03360 | putative protein : DC1 domain-containing protein                                      | 16   | 24   | 19   | 21   | 19   | 20   | 23   | 23       | 0.49     | 0.058356 | 18       | 21   | 25   | 14   | 21   | 16   | 15   | 20   | 21   | 17   | 1.25     | 0.652129 | 17       | 1.26     | 0.198972 |          |
| 250944_at   | A15g03380 | putative protein : heavy-metal-associated domain-contain                              | 399  | 576  | 582  | 411  | 523  | 408  | 519  | 447      | 1.16     | 0.369272 | 470      | 618  | 466  | 561  | 474  | 388  | 489  | 507  | 518  | 484  | 1.07     | 0.500595 | 474      | 1.09     | 0.571429 |          |
| 250945_at   | A15g03400 | putative protein : hypothetical protein                                               | 10   | 11   | 9    | 14   | 16   | 15   | 10   | 15       | 0.67     | 0.006450 | 9        | 9    | 8    | 11   | 8    | 10   | 10   | 10   | 9    | 10   | 0.86     | 0.097184 | 10       | 0.87     | 0.230265 |          |
| 250946_at   | A15g03420 | putative protein : dentin salivaphosphoprotein-related                                | 166  | 216  | 221  | 275  | 285  | 220  | 201  | 260      | 0.77     | 0.091890 | 163      | 134  | 169  | 225  | 199  | 156  | 196  | 186  | 156  | 191  | 0.82     | 0.078763 | 190      | 0.82     | 0.197070 |          |
| 250947_at   | A15g03450 | putative protein : zinc finger (C3HC4-type RING finger) fa                            | 168  | 213  | 222  | 222  | 248  | 184  | 203  | 218      | 0.83     | 0.581774 | 179      | 171  | 185  | 212  | 195  | 178  | 207  | 186  | 172  | 196  | 0.88     | 0.080613 | 195      | 0.88     | 0.161628 |          |
| 250948_at   | A15g03460 | putative protein : UDP-glucuronosyl-UDP-glucose transfe                               | 50   | 50   | 79   | 81   | 78   | 65   | 79   | 83       | 0.79     | 0.186648 | 47       | 48   | 47   | 50   | 58   | 44   | 47   | 50   | 57   | 50   | 0.94     | 0.554713 | 50       | 1.01     | 0.055587 |          |
| 250949_at   | A15g03510 | putative protein : zinc finger (C2H2 type) family protein                             | 49   | 58   | 76   | 83   | 92   | 81   | 61   | 85       | 0.72     | 0.045073 | 108      | 127  | 129  | 154  | 111  | 133  | 138  | 130  | 121  | 133  | 0.91     | 0.291652 | 133      | 0.91     | 0.462275 |          |
| 250950_at   | A15g03540 | putative protein : exocyst subunit EXO70 family protein                               | 201  | 282  | 296  | 307  | 334  | 244  | 260  | 295      | 0.88     | 0.428213 | 224      | 230  | 246  | 311  | 272  | 229  | 259  | 275  | 233  | 269  | 0.87     | 0.097863 | 271      | 0.86     | 0.202439 |          |
| 250951_at   | A15g03550 | putative protein : hypothetical protein                                               | 12   | 13   | 14   | 18   | 15   | 13   | 13   | 15       | 0.86     | 0.215262 | 13       | 12   | 11   | 11   | 10   | 11   | 12   | 8    | 12   | 10   | 1.19     | 0.053467 | 11       | 1.16     | 0.073158 |          |
| 250952_at   | A15g03570 | putative protein : non-responsive transporter-related                                 | 31   | 41   | 37   | 44   | 36   | 40   | 36   | 43       | 0.97     | 0.817435 | 32       | 30   | 40   | 34   | 32   | 28   | 30   | 36   | 34   | 32   | 1.07     | 0.474024 | 30       | 1.15     | 0.244030 |          |
| 250953_at   | A15g03410 | putative protein : supported by full-length DPB-1 transcription factor, putative (DPI | 122  | 169  | 161  | 187  | 189  | 150  | 150  | 175      | 0.86     | 0.266881 | 142      | 138  | 153  | 214  | 161  | 143  | 185  | 167  | 138  | 174  | 0.79     | 0.083563 | 173      | 0.80     | 0.207931 |          |
| 250954_at   | A15g03520 | putative protein : supported by full-length Ras-related GTP-binding protein, putativ  | 560  | 707  | 769  | 971  | 995  | 830  | 679  | 932      | 0.73     | 0.034667 | 643      |      |      |      |      |      |      |      |      |      |          |          |          |          |          |          |

|           |            |                                            |                                            |      |      |      |      |      |      |      |      |      |          |      |      |      |      |       |      |      |          |      |      |      |          |          |      |          |          |
|-----------|------------|--------------------------------------------|--------------------------------------------|------|------|------|------|------|------|------|------|------|----------|------|------|------|------|-------|------|------|----------|------|------|------|----------|----------|------|----------|----------|
| 250878_at | A15f040050 | mutarase - like protein gene cob intron    | mutarase-related                           | 57   | 62   | 73   | 75   | 88   | 67   | 64   | 77   | 0.83 | 0.170738 | 47   | 45   | 51   | 60   | 53    | 48   | 58   | 48       | 48   | 53   | 0.90 | 0.175645 | 54       | 0.89 | 0.229272 |          |
| 250879_at | A15f040060 | putative protein various predicted prot    | dehydration-responsive protein-related     | 115  | 133  | 143  | 155  | 153  | 129  | 130  | 146  | 0.90 | 0.261665 | 100  | 99   | 123  | 151  | 117   | 101  | 127  | 119      | 107  | 123  | 0.87 | 0.255885 | 123      | 0.87 | 0.413113 |          |
| 250880_at | A15f040700 | outative protein Ube-1a. Mus musculus      | short-chain dehydrogenase/reductase (S     | 105  | 142  | 144  | 149  | 172  | 130  | 130  | 150  | 0.87 | 0.308862 | 114  | 105  | 133  | 154  | 130   | 115  | 125  | 121      | 117  | 129  | 0.91 | 0.317073 | 133      | 0.88 | 0.326335 |          |
| 250881_at | A15f040800 | putative protein                           | putative protein                           | 13   | 20   | 20   | 20   | 45   | 28   | 29   | 34   | 0.58 | 0.030716 | 28   | 38   | 30   | 53   | 58    | 61   | 59   | 63       | 59   | 63   | 0.91 | 0.027116 | 61       | 0.95 | 0.006520 |          |
| 250882_at | A15f040000 | outative protein                           | subunit by full-length expressed protein   | 17   | 24   | 31   | 48   | 27   | 25   | 24   | 34   | 0.72 | 0.330734 | 17   | 20   | 31   | 20   | 16    | 14   | 22   | 22       | 23   | 19   | 1.22 | 0.333191 | 17       | 1.39 | 0.242006 |          |
| 250883_at | A15f039700 | putative protein predicted proteins, Ara   | F-box family protein                       | 334  | 427  | 424  | 518  | 573  | 465  | 428  | 519  | 0.83 | 0.189764 | 337  | 394  | 350  | 547  | 425   | 394  | 447  | 440      | 360  | 450  | 0.80 | 0.049315 | 455      | 0.79 | 0.130334 |          |
| 250884_at | A15f039400 | signal recognition particle 54CP protein   | signal recognition particle 54 kDa protein | 237  | 353  | 395  | 283  | 311  | 242  | 295  | 279  | 1.06 | 0.671122 | 284  | 293  | 309  | 377  | 294   | 351  | 295  | 330      | 290  | 330  | 0.90 | 0.249664 | 314      | 0.94 | 0.591539 |          |
| 250885_at | A15f039400 | ABC transporter, ABC-like protein ABC-type | ABC transporter family protein             | 141  | 181  | 181  | 181  | 217  | 146  | 177  | 181  | 0.98 | 0.882866 | 146  | 132  | 150  | 180  | 150   | 150  | 150  | 150      | 150  | 150  | 1.04 | 0.033501 | 178      | 0.94 | 0.078053 |          |
| 250886_at | A15f044400 | putative protein                           | expressed protein                          | 124  | 203  | 209  | 224  | 246  | 177  | 179  | 216  | 0.83 | 0.337634 | 164  | 202  | 204  | 278  | 201   | 211  | 211  | 200      | 190  | 220  | 0.86 | 0.216266 | 230      | 0.83 | 0.219449 |          |
| 250887_at | A15f044450 | putative protein                           | putative protein                           | 35   | 45   | 27   | 33   | 34   | 28   | 35   | 32   | 1.12 | 0.530729 | 29   | 34   | 31   | 33   | 29    | 27   | 35   | 27       | 31   | 30   | 1.04 | 0.625953 | 30       | 1.05 | 0.552418 |          |
| 250888_at | A15f044600 | outative protein trichostavin, Orvclolase  | expressed protein                          | 110  | 125  | 144  | 156  | 170  | 124  | 126  | 150  | 0.84 | 0.230536 | 137  | 126  | 138  | 193  | 147   | 137  | 154  | 136      | 134  | 153  | 0.87 | 0.228312 | 159      | 0.84 | 0.236723 |          |
| 250889_at | A15f045000 | putative protein echinocyst-related        | cytochrome P450, putative                  | 163  | 183  | 210  | 226  | 254  | 198  | 191  | 225  | 0.85 | 0.030640 | 156  | 107  | 159  | 232  | 114   | 114  | 106  | 106      | 105  | 141  | 1.07 | 0.31     | 0.042087 | 108  | 1.30     | 0.141622 |
| 250890_at | A15f045200 | 3-oxoacyl-facil-carrier-protein            | synthase expressed protein                 | 131  | 164  | 173  | 161  | 203  | 152  | 156  | 172  | 0.91 | 0.484477 | 129  | 147  | 148  | 201  | 166   | 163  | 156  | 171      | 142  | 172  | 0.92 | 0.043433 | 177      | 0.80 | 0.067877 |          |
| 250891_at | A15f045300 | fatty acid elongase - like protein KCS1    | beta-ketoacyl-CoA synthase family          | 408  | 393  | 372  | 461  | 550  | 363  | 390  | 458  | 0.85 | 0.285332 | 501  | 473  | 524  | 720  | 622   | 544  | 530  | 568      | 499  | 597  | 0.84 | 0.083703 | 629      | 0.79 | 0.069682 |          |
| 250892_at | A15f045450 | myotubularin - like protein myotubularin   | expressed protein                          | 350  | 462  | 533  | 453  | 559  | 374  | 448  | 462  | 0.97 | 0.866460 | 320  | 282  | 283  | 373  | 327   | 288  | 357  | 341      | 295  | 337  | 0.87 | 0.094842 | 329      | 0.70 | 0.279516 |          |
| 250893_at | A15f045600 | outative protein various predicted prot    | DEMETER protein (DME)                      | 41   | 47   | 36   | 57   | 61   | 53   | 41   | 57   | 0.72 | 0.105052 | 40   | 30   | 33   | 35   | 33    | 30   | 42   | 33       | 34   | 34   | 0.99 | 0.925209 | 32       | 1.05 | 0.657619 |          |
| 250894_at | A15f046700 | outative protein RBL protein, Homo sa      | expressed protein                          | 159  | 199  | 240  | 232  | 279  | 210  | 199  | 240  | 0.83 | 0.257616 | 77   | 79   | 95   | 70   | 86    | 70   | 117  | 101      | 84   | 89   | 0.94 | 0.704414 | 76       | 1.11 | 0.330613 |          |
| 250895_at | A15f045800 | outative protein various predicted prot    | DEMETER protein (DME)                      | 184  | 215  | 218  | 222  | 270  | 186  | 205  | 226  | 0.91 | 0.484743 | 146  | 114  | 129  | 166  | 135   | 125  | 160  | 148      | 130  | 147  | 0.88 | 0.207825 | 142      | 0.91 | 0.466762 |          |
| 250897_at | A15f046200 | 8-amino-7-oxononanoate synthase - II       | aminotransferase class I and II family pr  | 109  | 128  | 112  | 136  | 158  | 121  | 116  | 138  | 0.84 | 0.154151 | 99   | 87   | 111  | 143  | 130   | 102  | 114  | 108      | 99   | 120  | 0.83 | 0.117477 | 125      | 0.79 | 0.133069 |          |
| 250898_at | A15f046300 | cytochrome P450 - like protein cytochr     | cytochrome P450, putative                  | 53   | 72   | 93   | 75   | 76   | 70   | 72   | 74   | 0.98 | 0.925866 | 71   | 77   | 83   | 55   | 42    | 42   | 45   | 52       | 77   | 47   | 1.64 | 0.000429 | 46       | 1.67 | 0.004705 |          |
| 250899_at | A15f046400 | MADS-box protein - like SLN3 MADS-         | MADS-box family protein                    | 16   | 19   | 24   | 22   | 20   | 23   | 19   | 22   | 0.90 | 0.382960 | 14   | 18   | 18   | 23   | 20    | 18   | 25   | 17       | 21   | 21   | 0.78 | 0.085465 | 21       | 0.79 | 0.056468 |          |
| 250900_at | A15f046500 | outative protein predicted protein, Ara    | hypothetical protein                       | 35   | 37   | 51   | 53   | 50   | 50   | 41   | 51   | 0.80 | 0.119025 | 39   | 36   | 47   | 39   | 39    | 42   | 49   | 43       | 41   | 42   | 0.95 | 0.590612 | 40       | 1.01 | 0.884817 |          |
| 250901_at | A15f046610 | outative protein CGI-01 protein, Homo      | sacermidine synthase-related / outresc     | 41   | 53   | 62   | 58   | 68   | 57   | 52   | 61   | 0.85 | 0.267807 | 39   | 62   | 65   | 45   | 43    | 45   | 46   | 43       | 55   | 44   | 1.25 | 0.119885 | 44       | 1.25 | 0.251252 |          |
| 250902_at | A15f044900 | outative protein predicted proteins, Ara   | choshiodalate cvdvdilvitransferase fami    | 95   | 118  | 138  | 107  | 114  | 105  | 117  | 109  | 1.08 | 0.548985 | 218  | 254  | 231  | 211  | 159   | 153  | 160  | 152      | 234  | 167  | 1.40 | 0.006717 | 174      | 1.34 | 0.046668 |          |
| 250903_at | A15f044300 | putative RNA-binding protein astrocyti     | KH domain-containing protein               | 352  | 512  | 430  | 511  | 598  | 422  | 431  | 511  | 0.84 | 0.312406 | 396  | 476  | 447  | 662  | 514   | 486  | 466  | 432      | 440  | 512  | 0.86 | 0.243916 | 554      | 0.79 | 0.123548 |          |
| 250904_at | A15f044700 | putative protein                           | supported by full-leng expressed protein   | 149  | 182  | 163  | 163  | 179  | 121  | 165  | 154  | 0.07 | 0.616216 | 144  | 134  | 152  | 148  | 124   | 130  | 106  | 107      | 144  | 121  | 1.19 | 0.123889 | 134      | 1.07 | 0.340536 |          |
| 250905_at | A15f046000 | hn binding protein - like RNA binding      | pr RNA recognition motif (RRM)-containi    | 805  | 946  | 1008 | 982  | 1071 | 886  | 920  | 980  | 0.94 | 0.496744 | 881  | 945  | 996  | 1235 | 1069  | 969  | 1034 | 1024     | 941  | 1066 | 0.88 | 0.101121 | 1091     | 0.86 | 0.149213 |          |
| 250906_at | A15f045900 | sulfithe reductase - supported by cDN      | sulfite reductase / ferredoxin (SIR)       | 674  | 605  | 591  | 879  | 808  | 724  | 623  | 804  | 0.78 | 0.025651 | 490  | 399  | 516  | 581  | 538   | 427  | 613  | 586      | 468  | 549  | 0.85 | 0.164767 | 515      | 0.91 | 0.466150 |          |
| 250907_at | A15f044800 | putative protein predicted proteins, Ara   | acid phosphatase                           | 118  | 111  | 123  | 137  | 160  | 122  | 117  | 140  | 0.84 | 0.129224 | 84   | 84   | 98   | 91   | 95    | 81   | 69   | 74       | 70   | 81   | 78   | 1.04     | 0.721216 | 82   | 0.99     | 0.945970 |
| 250908_at | A15f045100 | 3-choshiodalate-decrdient protein          | 3-choshiodalate-dependent protein ki       | 299  | 337  | 398  | 465  | 440  | 343  | 316  | 399  | 0.79 | 0.061324 | 308  | 378  | 333  | 519  | 402   | 333  | 384  | 388      | 316  | 405  | 0.78 | 0.063941 | 418      | 0.76 | 0.027007 |          |
| 250909_at | A15f044100 | putative protein NAC22, Arabidopsis the    | an apical meristem (NAM) family protein    | 867  | 1056 | 1052 | 1208 | 1364 | 1042 | 992  | 1205 | 0.82 | 0.130709 | 989  | 845  | 934  | 1202 | 1038  | 998  | 1166 | 1119     | 923  | 1088 | 0.84 | 0.085326 | 1045     | 0.88 | 0.278270 |          |
| 250910_at | A15f045500 | putative protein : supported by cDNA:      | expressed protein                          | 280  | 318  | 356  | 437  | 470  | 362  | 318  | 423  | 0.75 | 0.053712 | 214  | 224  | 239  | 344  | 276   | 234  | 277  | 258      | 226  | 278  | 0.81 | 0.084083 | 285      | 0.79 | 0.148976 |          |
| 250911_at | A15f044200 | putative protein mod protein, Dictyost     | chick repeat-containing protein            | 272  | 351  | 325  | 362  | 430  | 308  | 316  | 367  | 0.86 | 0.294925 | 299  | 266  | 283  | 412  | 361   | 300  | 376  | 344      | 283  | 359  | 0.79 | 0.029041 | 358      | 0.79 | 0.002830 |          |
| 250912_at | A15f046810 | outative protein RBL protein, Homo sa      | expressed protein                          | 171  | 189  | 183  | 209  | 146  | 153  | 179  | 185  | 0.96 | 0.336714 | 108  | 97   | 109  | 135  | 126   | 96   | 123  | 118      | 104  | 116  | 0.88 | 0.148601 | 116      | 0.88 | 0.300938 |          |
| 250913_at | A15f046800 | outative protein predicted proteins, Ara   | expressed protein                          | 26   | 35   | 38   | 34   | 39   | 40   | 33   | 38   | 0.88 | 0.321675 | 29   | 45   | 40   | 41   | 32    | 33   | 46   | 40       | 38   | 39   | 0.99 | 0.914952 | 35       | 1.07 | 0.659392 |          |
| 250914_at | A15f047100 | aspartyl aminopeptidase - like protein     | an aspartyl aminopeptidase, putative       | 184  | 260  | 253  | 280  | 320  | 235  | 232  | 278  | 0.83 | 0.255141 | 181  | 184  | 203  | 280  | 213   | 206  | 232  | 242      | 189  | 235  | 0.81 | 0.045250 | 233      | 0.81 | 0.147924 |          |
| 250915_at | A15f047300 | putative protein predicted proteins, Ara   | expressed protein                          | 19   | 22   | 26   | 21   | 23   | 21   | 22   | 22   | 1.03 | 0.774035 | 15   | 21   | 20   | 19   | 16    | 14   | 25   | 19       | 19   | 19   | 0.98 | 0.886712 | 17       | 1.09 | 0.574901 |          |
| 250916_at | A15f046500 | putative protein                           | inducible protein (IPR) repeat-containi    | 195  | 323  | 277  | 233  | 296  | 165  | 265  | 242  | 1.09 | 0.652960 | 246  | 217  | 242  | 299  | 236   | 289  | 235  | 268      | 236  | 277  | 0.85 | 0.023463 | 267      | 0.89 | 0.201668 |          |
| 250917_at | A15f047900 | unknown protein                            | expressed protein                          | 76   | 131  | 117  | 113  | 121  | 76   | 108  | 104  | 1.04 | 0.840516 | 68   | 93   | 74   | 95   | 66    | 80   | 88   | 89       | 78   | 85   | 0.92 | 0.487833 | 80       | 0.98 | 0.900974 |          |
| 250918_at | A15f047600 | I-box binding factor - like protein I-box  | myb family transcription factor            | 233  | 267  | 404  | 335  | 372  | 250  | 301  | 319  | 0.94 | 0.792145 | 295  | 342  | 297  | 381  | 289   | 317  | 350  | 328      | 311  | 333  | 0.94 | 0.394737 | 329      | 0.95 | 0.604601 |          |
| 250919_at | A15f046600 | cytochrome P450 - like protein cytochr     | cytochrome P450, putative                  | 858  | 802  | 975  | 1066 | 1126 | 960  | 878  | 1051 | 0.84 | 0.070279 | 682  | 558  | 780  | 1283 | 1059  | 862  | 985  | 981      | 667  | 1034 | 0.64 | 0.012482 | 1088     | 0.62 | 0.043466 |          |
| 250920_at | A15f047700 | amino acid transport - like protein amir   | amino acid permease family protein         | 922  | 1100 | 1733 | 706  | 808  | 487  | 1322 | 667  | 1.98 | 0.060502 | 873  | 1133 | 917  | 1035 | 805   | 892  | 1134 | 1168     | 1008 | 1007 | 1.00 | 0.394916 | 911      | 1.11 | 0.356522 |          |
| 250921_at | A15f047400 | putative protein predicted proteins, Ara   | ACT domain-containing protein              | 482  | 527  | 710  | 607  | 754  | 596  | 572  | 683  | 0.77 | 0.074027 | 631  | 438  | 552  | 636  | 526   | 672  | 679  | 0.919770 | 684  | 702  | 0.79 | 0.019770 | 684      | 0.77 | 0.006507 |          |
| 250922_at | A15f047400 | 40S ribosomal protein S17 - like 40S       | ribosomal protein S17 (RPS17B) /           | 2977 | 2973 | 3171 | 3435 | 3774 | 3314 | 2980 | 3507 | 0.85 | 0.039447 | 2850 | 3130 | 3216 | 3687 | 3393  | 2876 | 3426 | 3065     | 3395 | 3905 | 0.90 | 0.151868 | 3319     | 0.92 | 0.387563 |          |
| 250923_at | A15f047500 | F1/F0-ATPase inhibitor - like protein F1   | F1/F0-ATPase inhibitor protein, putative   | 430  | 697  | 797  | 705  | 928  | 699  | 642  | 777  | 0.83 | 0.304458 | 875  | 928  | 865  | 1241 | 1077  | 1031 | 1035 | 998      | 889  | 1076 | 0.83 | 0.019518 | 1116     | 0.80 | 0.027246 |          |
| 250924_at | A15f047200 | disease resistance - like protein rodr     | disease resistance protein (CC-NBS-LR      | 482  | 405  | 638  | 761  | 793  | 652  | 508  | 735  | 0.69 | 0.043632 | 459  | 404  | 420  | 601  | 512</ |      |      |          |      |      |      |          |          |      |          |          |

|           |           |                                                                                          |     |     |     |     |     |     |     |     |      |          |     |     |     |      |     |     |     |     |     |      |          |          |         |          |          |         |
|-----------|-----------|------------------------------------------------------------------------------------------|-----|-----|-----|-----|-----|-----|-----|-----|------|----------|-----|-----|-----|------|-----|-----|-----|-----|-----|------|----------|----------|---------|----------|----------|---------|
| 250784_at | A15g05480 | unknown protein ; supported by cDNA: expressed protein                                   | 239 | 313 | 293 | 309 | 350 | 273 | 282 | 311 | 0.91 | 0.403538 | 238 | 249 | 243 | 334  | 295 | 259 | 341 | 309 | 243 | 308  | 0.79     | 0.017023 | 296     | 0.82     | 0.072083 |         |
| 250785_at | A15g05510 | unknown protein                                                                          | 68  | 84  | 83  | 93  | 91  | 90  | 78  | 92  | 0.85 | 0.081794 | 75  | 69  | 92  | 100  | 85  | 81  | 83  | 79  | 87  | 87   | 0.91     | 0.289708 | 89      | 0.89     | 0.316047 |         |
| 250786_at | A15g05540 | putative protein stromin similarly to unk exoducase family protein                       | 125 | 187 | 156 | 172 | 190 | 154 | 156 | 172 | 0.91 | 0.484692 | 135 | 151 | 148 | 192  | 156 | 135 | 141 | 144 | 145 | 154  | 0.94     | 0.548690 | 161     | 0.90     | 0.401254 |         |
| 250787_at | A15g05560 | putative protein similar to unknown prl nucleoprotein-related                            | 139 | 163 | 168 | 176 | 222 | 139 | 162 | 185 | 0.88 | 0.370265 | 132 | 142 | 148 | 143  | 146 | 139 | 140 | 142 | 140 | 137  | 146      | 0.97     | 0.14781 | 145      | 0.98     | 0.95217 |
| 250788_at | A15g05580 | putative protein similar to unknown drr transducin family protein / WD-40 repeat         | 101 | 129 | 129 | 139 | 148 | 110 | 119 | 132 | 0.90 | 0.425722 | 125 | 78  | 132 | 128  | 122 | 99  | 111 | 104 | 111 | 113  | 0.99     | 0.931179 | 116     | 0.96     | 0.807206 |         |
| 250789_at | A15g05630 | putative protein contains similarity to ca amino acid permease family protein            | 93  | 123 | 132 | 131 | 164 | 106 | 116 | 134 | 0.87 | 0.435752 | 93  | 88  | 89  | 106  | 98  | 96  | 116 | 102 | 90  | 104  | 0.87     | 0.027761 | 100     | 0.90     | 0.032123 |         |
| 250790_at | A15g05640 | putative protein similar to unknown prl nucleoprotein-related                            | 196 | 235 | 208 | 240 | 212 | 187 | 246 | 213 | 1.15 | 0.415546 | 350 | 372 | 345 | 300  | 333 | 329 | 396 | 374 | 355 | 364  | 0.98     | 0.677161 | 350     | 1.01     | 0.821748 |         |
| 250791_at | A15g05650 | nucleic acid binding protein-like ; sucoor PHD finger family protein                     | 425 | 577 | 502 | 611 | 471 | 507 | 502 | 577 | 0.85 | 0.311769 | 606 | 570 | 608 | 579  | 608 | 729 | 640 | 729 | 640 | 729  | 0.92     | 0.047650 | 782     | 0.97     | 0.003538 |         |
| 250792_at | A15g05620 | unknown protein ; supported by full-len outer membrane OMP85 family protein              | 171 | 235 | 262 | 232 | 276 | 212 | 223 | 240 | 0.93 | 0.633643 | 170 | 147 | 178 | 210  | 166 | 148 | 195 | 165 | 183 | 0.90 | 0.326159 | 175      | 0.95    | 0.686142 |          |         |
| 250793_at | A15g05680 | leucanthoxanidin dihydroxase-like or oxidoreductase, 20G-Fe(II) oxoanase I               | 106 | 138 | 145 | 134 | 204 | 169 | 129 | 169 | 0.77 | 0.166777 | 142 | 172 | 182 | 353  | 390 | 315 | 528 | 490 | 165 | 415  | 0.40     | 0.003887 | 352     | 0.47     | 0.001639 |         |
| 250796_at | A15g05550 | putative protein similar to unknown drr zinc finger protein                              | 58  | 100 | 89  | 90  | 107 | 77  | 83  | 92  | 0.90 | 0.596882 | 66  | 102 | 76  | 106  | 85  | 86  | 98  | 81  | 82  | 91   | 0.89     | 0.357950 | 93      | 0.88     | 0.432836 |         |
| 250797_at | A15g05660 | putative protein contains similarity to ur zinc finger (NF-X1 type) family protein       | 328 | 416 | 432 | 418 | 522 | 390 | 391 | 443 | 0.88 | 0.370265 | 300 | 270 | 298 | 340  | 298 | 367 | 342 | 289 | 348 | 349  | 0.89     | 0.037828 | 345     | 0.84     | 0.133618 |         |
| 250798_at | A15g05670 | signal recognition particle receptor beta expressed protein                              | 541 | 650 | 677 | 731 | 755 | 673 | 623 | 731 | 0.85 | 0.107459 | 753 | 835 | 810 | 1069 | 904 | 784 | 823 | 793 | 799 | 875  | 0.91     | 0.341542 | 919     | 0.87     | 0.236698 |         |
| 250799_at | A15g05680 | putative protein similar to unknown prl nuclear pore complex protein-related             | 145 | 194 | 164 | 157 | 169 | 138 | 178 | 154 | 1.15 | 0.277756 | 133 | 106 | 141 | 144  | 131 | 107 | 134 | 144 | 127 | 132  | 0.96     | 0.672142 | 128     | 0.99     | 0.963981 |         |
| 250798_at | A15g05680 | anthranilate synthase component I-1 or anthranilate synthase, alpha subunit, co          | 275 | 354 | 362 | 340 | 359 | 300 | 331 | 333 | 0.99 | 0.943802 | 192 | 163 | 216 | 248  | 213 | 190 | 249 | 234 | 190 | 227  | 0.84     | 0.100814 | 217     | 0.88     | 0.310559 |         |
| 250799_at | A15g05740 | putative protein similar to unknown drr peptidase M50 family protein / sterol-rec        | 132 | 210 | 167 | 191 | 217 | 166 | 170 | 191 | 0.89 | 0.460555 | 146 | 132 | 168 | 171  | 161 | 154 | 170 | 167 | 149 | 165  | 0.90     | 0.109651 | 162     | 0.92     | 0.299139 |         |
| 250740_at | A15g05760 | I-SNARE SED5 (isoAOC6291.1) ; sau syntasin 31 (SVY31) / SED5                             | 73  | 108 | 98  | 106 | 125 | 87  | 92  | 104 | 0.88 | 0.407816 | 100 | 90  | 103 | 143  | 98  | 108 | 101 | 99  | 106 | 103  | 0.77     | 0.175794 | 113     | 0.72     | 0.163601 |         |
| 250741_at | A15g05790 | putative protein contains similarity to H-mi family transcription factor                 | 25  | 30  | 27  | 28  | 27  | 25  | 27  | 27  | 1.01 | 0.882475 | 19  | 21  | 24  | 32   | 28  | 28  | 36  | 25  | 21  | 30   | 0.71     | 0.025132 | 29      | 0.72     | 0.002030 |         |
| 250742_at | A15g05800 | putative protein similar to unknown prl expressed protein                                | 220 | 338 | 343 | 320 | 335 | 263 | 301 | 306 | 0.98 | 0.912036 | 338 | 377 | 339 | 506  | 338 | 356 | 424 | 414 | 351 | 407  | 0.86     | 0.214452 | 400     | 0.88     | 0.423923 |         |
| 250743_at | A15g05820 | phosphatidylphosphonolipid transferal phosphate translocator-related                     | 124 | 149 | 160 | 194 | 201 | 182 | 144 | 192 | 0.75 | 0.016484 | 88  | 101 | 101 | 157  | 122 | 110 | 133 | 118 | 127 | 128  | 0.78     | 0.033731 | 130     | 0.75     | 0.090636 |         |
| 250744_at | A15g05840 | putative protein similar to unknown prl expressed protein                                | 18  | 27  | 24  | 28  | 28  | 27  | 23  | 27  | 0.53 | 0.159934 | 21  | 21  | 28  | 24   | 16  | 21  | 25  | 22  | 22  | 1.08 | 0.559540 | 20       | 1.16    | 0.393134 |          |         |
| 250745_at | A15g05850 | putative protein stromin similarly to unk leucine-rich repeat family protein             | 50  | 64  | 65  | 60  | 63  | 60  | 60  | 61  | 0.98 | 0.809831 | 48  | 44  | 44  | 50   | 42  | 41  | 54  | 50  | 45  | 48   | 0.95     | 0.490757 | 44      | 1.01     | 0.846917 |         |
| 250746_at | A15g05880 | glucuronosyl transferase-like protein UDP-glucuronosylUDP-glucosyl transfe               | 28  | 33  | 43  | 37  | 39  | 39  | 34  | 38  | 0.90 | 0.420953 | 21  | 23  | 27  | 22   | 23  | 20  | 26  | 21  | 24  | 22   | 1.07     | 0.434376 | 22      | 1.11     | 0.321298 |         |
| 250747_at | A15g05900 | glucuronosyl transferase-like protein UDP-glucuronosylUDP-glucosyl transfe               | 27  | 31  | 45  | 44  | 34  | 49  | 34  | 42  | 0.81 | 0.326755 | 22  | 19  | 27  | 24   | 21  | 22  | 29  | 26  | 23  | 24   | 0.93     | 0.536150 | 22      | 1.01     | 0.909238 |         |
| 250748_at | A15g05710 | ADP(H)-like protein ; supported by full-le pleckstrin homology (PH) domain-contai        | 105 | 148 | 169 | 168 | 164 | 140 | 141 | 157 | 0.89 | 0.170681 | 144 | 187 | 163 | 237  | 172 | 175 | 198 | 165 | 194 | 0.85 | 0.161933 | 195      | 0.85    | 0.291295 |          |         |
| 250749_at | A15g05780 | 26S proteasome regulatory subunit S1; 26S proteasome non-ATPase regulato                 | 541 | 633 | 652 | 735 | 749 | 605 | 578 | 730 | 0.79 | 0.079551 | 646 | 722 | 750 | 938  | 814 | 713 | 700 | 700 | 706 | 773  | 0.91     | 0.348905 | 822     | 0.86     | 0.184152 |         |
| 250750_at | A15g05870 | glucuronosyl transferase-like protein UDP-glucuronosylUDP-glucosyl transfe               | 13  | 16  | 24  | 23  | 22  | 21  | 17  | 22  | 0.80 | 0.235783 | 12  | 14  | 15  | 17   | 14  | 13  | 19  | 13  | 13  | 15   | 0.90     | 0.424803 | 14      | 0.93     | 0.509498 |         |
| 250751_at | A15g05890 | glucuronosyl transferase-like protein UDP-glucuronosylUDP-glucosyl transfe               | 54  | 59  | 68  | 78  | 79  | 75  | 60  | 77  | 0.78 | 0.017365 | 38  | 33  | 35  | 49   | 36  | 44  | 40  | 39  | 35  | 42   | 0.84     | 0.091512 | 43      | 0.81     | 0.117730 |         |
| 250752_at | A15g05890 | cytochrome P450 90A1 (isoC42569) ; cytochrome P450 90A1 (CYP90A1) (CY                    | 267 | 435 | 394 | 341 | 423 | 256 | 366 | 340 | 1.08 | 0.732313 | 365 | 403 | 371 | 352  | 322 | 305 | 414 | 368 | 387 | 352  | 1.10     | 0.240376 | 326     | 1.18     | 0.022736 |         |
| 250753_at | A15g05920 | glucuronosyl transferase-like protein UDP-glucuronosylUDP-glucosyl transfe               | 51  | 78  | 68  | 78  | 78  | 68  | 68  | 68  | 0.94 | 0.840901 | 34  | 31  | 36  | 42   | 41  | 42  | 51  | 42  | 41  | 42   | 0.92     | 0.124058 | 44      | 0.78     | 0.004221 |         |
| 250754_at | A15g05700 | arginine-P450 RNAse transferase 1 ; arginine-mRNA-protein transferase 1 ; arg            | 109 | 141 | 161 | 154 | 191 | 132 | 137 | 159 | 0.86 | 0.385514 | 121 | 99  | 141 | 148  | 122 | 116 | 142 | 136 | 120 | 134  | 0.90     | 0.297441 | 130     | 0.92     | 0.559281 |         |
| 250755_at | A15g05750 | DnaJ-like protein ; supported by cDNA DnaJ heat shock N-terminal domain-co               | 42  | 51  | 57  | 60  | 58  | 50  | 56  | 58  | 0.93 | 0.319638 | 45  | 54  | 57  | 67   | 51  | 52  | 47  | 48  | 52  | 53   | 0.99     | 0.897496 | 56      | 0.92     | 0.533245 |         |
| 250756_at | A15g05940 | putative protein stromin similarly to unk expressed protein                              | 73  | 82  | 72  | 78  | 83  | 60  | 76  | 74  | 1.03 | 0.806006 | 50  | 47  | 65  | 66   | 59  | 54  | 66  | 49  | 54  | 57   | 0.95     | 0.061010 | 60      | 0.90     | 0.404702 |         |
| 250757_at | A15g05980 | tetrahydrofolate dehydrogenase-like ; dihydrofolate synthetase/folylpolygluta            | 73  | 108 | 98  | 106 | 125 | 87  | 92  | 104 | 0.88 | 0.407816 | 100 | 90  | 103 | 143  | 98  | 108 | 101 | 99  | 106 | 103  | 0.77     | 0.175794 | 113     | 0.72     | 0.163601 |         |
| 250758_at | A15g06000 | eukaryotic translation initiation factor 3 ; eukaryotic translation initiation factor 3G | 170 | 199 | 212 | 240 | 241 | 225 | 194 | 238 | 0.81 | 0.036454 | 188 | 206 | 230 | 300  | 240 | 248 | 230 | 230 | 208 | 258  | 0.81     | 0.107544 | 273     | 0.76     | 0.109004 |         |
| 250759_at | A15g06020 | self-incompatibility protein-related                                                     | 19  | 17  | 20  | 20  | 20  | 19  | 20  | 19  | 0.93 | 0.155003 | 25  | 18  | 23  | 25   | 21  | 28  | 34  | 21  | 22  | 26   | 0.85     | 0.307305 | 25      | 0.89     | 0.360382 |         |
| 250760_at | A15g06040 | unknown protein                                                                          | 3   | 2   | 5   | 7   | 6   | 3   | 4   | 5   | 0.73 | 0.362224 | 5   | 3   | 6   | 8    | 7   | 4   | 8   | 5   | 6   | 7    | 0.79     | 0.355398 | 6       | 0.81     | 0.489231 |         |
| 250761_at | A15g06050 | anykinin-like protein                                                                    | 303 | 362 | 403 | 452 | 383 | 342 | 403 | 383 | 0.81 | 0.044192 | 218 | 197 | 266 | 333  | 271 | 297 | 255 | 227 | 271 | 297  | 0.82     | 0.184912 | 280     | 0.81     | 0.241566 |         |
| 250762_at | A15g05990 | putative protein similar to unknown prl mitochondrial glycoprotein family protein        | 138 | 156 | 177 | 181 | 200 | 166 | 157 | 182 | 0.86 | 0.164221 | 162 | 182 | 187 | 243  | 193 | 203 | 204 | 188 | 176 | 206  | 0.85     | 0.07525  | 213     | 0.83     | 0.100437 |         |
| 250763_at | A15g06060 | short chain alcohol dehydrogenase-like troponin reductase, putative / trocine d          | 252 | 364 | 343 | 364 | 421 | 350 | 319 | 378 | 0.84 | 0.220667 | 288 | 347 | 334 | 520  | 392 | 338 | 384 | 356 | 323 | 398  | 0.81     | 0.124465 | 416     | 0.78     | 0.174621 |         |
| 250764_at | A15g05960 | putative protein similar to unknown drr protease inhibitor/seed storage/acidic tran      | 359 | 446 | 50  | 46  | 50  | 46  | 45  | 47  | 0.95 | 0.508905 | 44  | 48  | 44  | 44   | 37  | 43  | 44  | 45  | 45  | 42   | 1.07     | 0.235407 | 41      | 1.10     | 0.295622 |         |
| 250765_at | A15g05930 | unknown protein ; supported by full-len guanlyl cyclase-related (GCY1)                   | 101 | 198 | 268 | 264 | 337 | 237 | 268 | 279 | 0.96 | 0.619842 | 212 | 238 | 229 | 388  | 282 | 262 | 252 | 226 | 268 | 0.84 | 0.047622 | 284      | 0.80    | 0.019351 |          |         |
| 250766_at | A15g05970 | deoxyphosphate synthase ; supported by deoxyphosphate synthase                           | 137 | 148 | 157 | 181 | 210 | 154 | 145 | 182 | 0.85 | 0.093793 | 128 | 149 | 153 | 143  | 128 | 159 | 160 | 158 | 160 | 172  | 0.83     | 0.083293 | 180     | 0.79     | 0.094321 |         |
| 250767_at | A15g05950 | putative protein similar to unknown prl expressed protein                                | 193 | 225 | 235 | 262 | 292 | 280 | 218 | 278 | 0.78 | 0.017813 | 304 | 347 | 375 | 453  | 358 | 353 | 351 | 339 | 342 | 367  | 0.93     | 0.471067 | 382     | 0.89     | 0.389571 |         |
| 250768_at | A15g06070 | Expressed protein ; supported by full-le Expressed protein ; supported by full-len       | 159 | 163 | 242 | 169 | 196 | 181 | 188 | 182 | 1.03 | 0.840804 | 79  | 87  | 101 | 102  | 65  | 60  | 89  | 89  | 89  | 81   | 1.10     | 0.493880 | 76      | 1.18     | 0.401440 |         |
| 250769_at | A15g06080 | putative protein similar to unknown drr LOB domain protein 33 ; lateral domain           | 16  | 16  | 21  | 22  | 21  | 20  | 18  | 21  | 0.85 | 0.168704 | 11  | 15  | 16  | 18   | 15  | 12  | 18  | 16  | 14  | 16   | 0.89     | 0.395733 | 15      | 0.93     | 0.685668 |         |
| 250770_at | A15g06100 | MYB family transcription factor-like ; myb family transcription factor (MYB33)           | 61  | 103 | 108 | 92  | 117 | 89  | 105 | 105 | 0.81 | 0.849001 | 41  | 62  | 71  | 68   | 74  | 62  | 77  | 68  | 69  | 74   | 0.92     | 0.120948 | 75      | 0.90     | 0.365056 |         |
| 250771_at | A15g06110 | cell division related protein-like ; DnaJ heat shock N-terminal domain-co                | 240 | 250 |     |     |     |     |     |     |      |          |     |     |     |      |     |     |     |     |     |      |          |          |         |          |          |         |

|             |           |                                                                                      |      |      |      |      |      |      |      |      |          |          |      |      |      |      |      |      |      |      |      |      |          |          |          |          |          |          |
|-------------|-----------|--------------------------------------------------------------------------------------|------|------|------|------|------|------|------|------|----------|----------|------|------|------|------|------|------|------|------|------|------|----------|----------|----------|----------|----------|----------|
| 250696_e_at | A15g06790 | putative protein similar to unknown prd expressed protein                            | 22   | 26   | 24   | 26   | 25   | 25   | 24   | 26   | 0.93     | 0.258370 | 22   | 21   | 26   | 24   | 17   | 26   | 28   | 21   | 23   | 23   | 0.98     | 0.857407 | 22       | 1.02     | 0.888233 |          |
| 250697_at   | A15g06800 | putative protein contains similarity to trt myb family transcription factor          | 23   | 23   | 37   | 37   | 31   | 28   | 33   | 0.84 | 0.365955 | 24       | 24   | 24   | 36   | 30   | 25   | 30   | 27   | 24   | 30   | 0.81 | 0.065059 | 30       | 0.79     | 0.109932 |          |          |
| 250698_at   | A15g06810 | putative protein similar to unknown rdt mitochondrial transcription termination f    | 83   | 89   | 115  | 101  | 120  | 98   | 96   | 106  | 0.90     | 0.415306 | 88   | 80   | 90   | 122  | 91   | 87   | 106  | 102  | 86   | 101  | 0.85     | 0.125100 | 100      | 0.86     | 0.297228 |          |
| 250699_at   | A15g06820 | putative protein kinase                                                              | 44   | 44   | 68   | 63   | 50   | 58   | 56   | 107  | 0.82     | 0.702342 | 36   | 35   | 41   | 37   | 42   | 40   | 38   | 46   | 41   | 37   | 0.908071 | 42       | 0.40     | 0.077394 |          |          |
| 250700_at   | A15g06830 | CDK5 activator-binding protein-like                                                  | 140  | 170  | 181  | 195  | 234  | 158  | 164  | 195  | 0.84     | 0.279738 | 118  | 120  | 137  | 165  | 164  | 128  | 148  | 142  | 125  | 150  | 0.83     | 0.052224 | 153      | 0.82     | 0.110913 |          |
| 250701_at   | A15g06840 | bZIP transcription factor-like protein                                               | 56   | 54   | 64   | 78   | 96   | 84   | 58   | 86   | 0.67     | 0.010869 | 58   | 58   | 60   | 74   | 65   | 62   | 73   | 69   | 59   | 68   | 0.86     | 0.020087 | 67       | 0.88     | 0.085965 |          |
| 250702_at   | A15g06730 | peroxidase - supported by full-length cDNA                                           | 17   | 19   | 22   | 21   | 22   | 20   | 21   | 0.91 | 0.304334 | 16       | 13   | 22   | 17   | 12   | 12   | 14   | 12   | 17   | 13   | 1.28 | 0.155132 | 14       | 1.26     | 0.322440 |          |          |
| 250641_at   | A15g06780 | putative protein similar to unknown prd same N terminus domain-containing pro        | 402  | 392  | 413  | 465  | 502  | 382  | 374  | 450  | 0.83     | 0.195677 | 354  | 330  | 328  | 554  | 379  | 380  | 414  | 417  | 378  | 354  | 0.79     | 0.080572 | 437      | 0.77     | 0.062990 |          |
| 250644_at   | A15g06750 | protein phosphatase 2C-like : sucoorte protein phosphatase 2C family protein /       | 211  | 210  | 251  | 242  | 264  | 225  | 224  | 244  | 0.92     | 0.334270 | 198  | 224  | 229  | 306  | 236  | 205  | 259  | 244  | 217  | 250  | 0.87     | 0.201567 | 249      | 0.87     | 0.364428 |          |
| 250645_at   | A15g06700 | putative protein contains similarity to unk expressed protein                        | 322  | 363  | 401  | 351  | 398  | 322  | 362  | 357  | 1.02     | 0.871885 | 333  | 303  | 364  | 389  | 354  | 317  | 360  | 326  | 333  | 349  | 0.95     | 0.487249 | 353      | 0.94     | 0.499178 |          |
| 250646_at   | A15g06720 | peroxidase (embICAA8212.1) : sucoo peroxidase, putative                              | 16   | 22   | 23   | 21   | 27   | 21   | 20   | 23   | 0.87     | 0.372664 | 20   | 18   | 23   | 19   | 17   | 18   | 21   | 20   | 21   | 19   | 1.07     | 0.363094 | 18       | 1.12     | 0.216414 |          |
| 250647_at   | A15g06770 | putative protein contains similarity to ur KH domain-containing protein / zinc finr  | 73   | 97   | 109  | 107  | 109  | 105  | 88   | 107  | 0.82     | 0.067676 | 92   | 95   | 101  | 146  | 106  | 100  | 109  | 88   | 96   | 112  | 0.86     | 0.244081 | 117      | 0.82     | 0.230079 |          |
| 250648_at   | A15g06760 | late embryogenesis abundant protein L late embryogenesis abundant group 1 d          | 18   | 22   | 23   | 318  | 20   | 16   | 86   | 118  | 0.73     | 0.811813 | 9    | 17   | 10   | 12   | 16   | 8    | 14   | 13   | 12   | 13   | 0.96     | 0.838962 | 22       | 0.99     | 0.985136 |          |
| 250649_at   | A15g06690 | thioredoxin-like ; supported by cDNA ; thioredoxin family protein                    | 80   | 113  | 169  | 72   | 115  | 76   | 121  | 88   | 1.38     | 0.323960 | 76   | 96   | 57   | 55   | 48   | 64   | 79   | 78   | 76   | 65   | 1.18     | 0.348046 | 56       | 1.37     | 0.162793 |          |
| 250650_at   | A15g06850 | anthranilate phosphoribosyltransferase C2 domain-containing protein                  | 48   | 64   | 76   | 81   | 82   | 78   | 63   | 80   | 0.78     | 0.091602 | 53   | 60   | 54   | 76   | 65   | 65   | 65   | 67   | 76   | 55   | 72       | 0.77     | 0.028298 | 69       | 0.81     | 0.036851 |
| 250651_at   | A15g06900 | cytochrome P450                                                                      | 22   | 32   | 39   | 36   | 35   | 29   | 31   | 33   | 0.93     | 0.672692 | 16   | 14   | 18   | 17   | 18   | 16   | 19   | 19   | 16   | 18   | 0.89     | 0.131998 | 17       | 0.93     | 0.405281 |          |
| 250652_at   | A15g06920 | putative protein contains similarity to ur expressed protein                         | 306  | 415  | 409  | 457  | 513  | 403  | 376  | 458  | 0.82     | 0.101932 | 222  | 173  | 259  | 309  | 252  | 213  | 286  | 271  | 218  | 266  | 0.82     | 0.135952 | 258      | 0.84     | 0.345084 |          |
| 250653_at   | A15g06930 | putative protein stron similarity to unk expressed protein                           | 33   | 38   | 46   | 37   | 39   | 35   | 39   | 37   | 1.06     | 0.617200 | 26   | 27   | 33   | 30   | 27   | 23   | 38   | 27   | 29   | 29   | 0.99     | 0.948366 | 27       | 1.08     | 0.474191 |          |
| 250654_at   | A15g06940 | receptor protein kinase-like protein                                                 | 177  | 128  | 124  | 160  | 162  | 135  | 116  | 152  | 0.76     | 0.047769 | 141  | 127  | 148  | 177  | 156  | 135  | 159  | 143  | 139  | 154  | 0.90     | 0.206400 | 156      | 0.89     | 0.275489 |          |
| 250655_at   | A15g06960 | transcription factor HBP-1b (qbAAD24) bZIP family transcription factor (OBF5)        | 92   | 118  | 238  | 267  | 290  | 243  | 209  | 267  | 0.78     | 0.071907 | 233  | 207  | 245  | 367  | 319  | 272  | 299  | 280  | 229  | 307  | 0.74     | 0.071127 | 319      | 0.72     | 0.038225 |          |
| 250656_at   | A15g06970 | steroid sulfotransferase-like protein                                                | 22   | 22   | 28   | 35   | 40   | 28   | 24   | 34   | 0.70     | 0.066152 | 17   | 24   | 22   | 27   | 20   | 19   | 21   | 21   | 21   | 22   | 0.98     | 0.895580 | 22       | 0.96     | 0.794718 |          |
| 250658_at   | A15g07040 | C3HC4-tvce RING zinc finger protein-ii zinc fincer (C3HC4-tvce RING fincer) fa       | 28   | 35   | 36   | 38   | 36   | 38   | 33   | 37   | 0.88     | 0.173591 | 25   | 29   | 39   | 26   | 31   | 28   | 26   | 25   | 31   | 27   | 1.14     | 0.306929 | 28       | 1.09     | 0.582569 |          |
| 250659_at   | A15g07050 | MIN21 nodulin protein-like                                                           | 35   | 51   | 49   | 47   | 60   | 54   | 45   | 54   | 0.84     | 0.248830 | 33   | 35   | 38   | 40   | 34   | 35   | 38   | 36   | 36   | 36   | 0.98     | 0.620297 | 36       | 0.98     | 0.787988 |          |
| 250660_at   | A15g07060 | RNA-binding protein-like                                                             | 37   | 34   | 54   | 32   | 43   | 34   | 41   | 37   | 1.13     | 0.534348 | 33   | 33   | 31   | 27   | 25   | 26   | 20   | 19   | 32   | 23   | 1.38     | 0.077470 | 26       | 1.24     | 0.001782 |          |
| 250661_at   | A15g07030 | nucleod DNA-binding-like protein :sup aspartyl protease family protein               | 915  | 1001 | 950  | 1834 | 1989 | 1605 | 955  | 1810 | 0.53     | 0.001718 | 1407 | 1274 | 1369 | 2349 | 1971 | 1682 | 1850 | 1823 | 1350 | 1935 | 0.70     | 0.008899 | 2000     | 0.67     | 0.029975 |          |
| 250662_at   | A15g07010 | steroid sulfotransferase-like protein :su sulfotransferase family protein            | 20   | 25   | 26   | 42   | 43   | 37   | 24   | 41   | 0.59     | 0.003079 | 20   | 18   | 18   | 29   | 25   | 28   | 29   | 27   | 19   | 28   | 0.68     | 0.000103 | 28       | 0.68     | 0.001806 |          |
| 250663_at   | A15g07110 | putative protein overnated rab acceptor: overnated rab acceptor (PRA1) family o      | 57   | 47   | 61   | 60   | 60   | 54   | 55   | 58   | 0.95     | 0.548415 | 56   | 56   | 70   | 56   | 55   | 49   | 50   | 47   | 61   | 52   | 1.17     | 0.74805  | 53       | 1.13     | 0.246057 |          |
| 250664_at   | A15g07080 | putative protein 10-deacetylacactin II transferase family protein                    | 40   | 26   | 30   | 35   | 44   | 40   | 30   | 41   | 0.73     | 0.024550 | 30   | 44   | 43   | 60   | 36   | 38   | 41   | 46   | 41   | 39   | 0.44     | 0.88     | 0.460225 | 45       | 0.87     | 0.555633 |
| 250665_at   | A15g06980 | unknown protein - supported by full-len expressed protein                            | 149  | 293  | 376  | 290  | 149  | 149  | 191  | 143  | 0.63     | 0.034260 | 113  | 124  | 128  | 128  | 212  | 173  | 175  | 202  | 202  | 212  | 0.80     | 0.045333 | 226      | 0.84     | 0.042611 |          |
| 250666_at   | A15g07100 | SFP1-like protein SFP1 protein - lpoim WRKY family transcription factor              | 16   | 24   | 24   | 20   | 31   | 25   | 21   | 25   | 0.84     | 0.395158 | 13   | 15   | 18   | 16   | 19   | 16   | 15   | 17   | 15   | 17   | 0.91     | 0.291033 | 17       | 0.88     | 0.297116 |          |
| 250667_at   | A15g07090 | 40S ribosomal protein S4 - supported b 40S ribosomal protein S4 (RPS4B)              | 1521 | 1939 | 2016 | 2113 | 2189 | 1833 | 1825 | 2045 | 0.89     | 0.307167 | 1294 | 1392 | 1355 | 1796 | 1344 | 1281 | 1707 | 1634 | 1347 | 1552 | 0.87     | 0.185293 | 1474     | 0.91     | 0.485329 |          |
| 250668_at   | A15g07020 | unknown protein : supported by full-len rchic-rich family protein                    | 126  | 191  | 181  | 224  | 233  | 185  | 166  | 214  | 0.78     | 0.131657 | 211  | 250  | 251  | 351  | 258  | 258  | 271  | 249  | 237  | 249  | 0.77     | 0.08     | 0.182050 | 289      | 0.82     | 0.197022 |
| 250669_at   | A15g06870 | polvoalacturonase inhibiting protein :su polvoalacturonase inhibito protein 2 (P     | 135  | 248  | 162  | 54   | 113  | 66   | 182  | 78   | 2.34     | 0.054766 | 91   | 119  | 86   | 71   | 92   | 100  | 132  | 121  | 98   | 103  | 0.95     | 0.077036 | 88       | 1.12     | 0.460739 |          |
| 250670_at   | A15g06860 | polvoalacturonase inhibiting protein 1 : polvoalacturonase inhibito protein 1 (P     | 38   | 46   | 59   | 45   | 51   | 39   | 48   | 45   | 1.06     | 0.710375 | 41   | 54   | 48   | 35   | 31   | 34   | 48   | 44   | 48   | 38   | 1.24     | 0.130365 | 33       | 1.43     | 0.026097 |          |
| 250671_at   | A15g06950 | transcription factor HBP-1b homolog :s bZIP transcription factor HBP-1b homolo       | 146  | 192  | 217  | 231  | 233  | 222  | 185  | 229  | 0.81     | 0.107309 | 151  | 186  | 207  | 257  | 203  | 200  | 195  | 184  | 181  | 208  | 0.87     | 0.248183 | 220      | 0.82     | 0.190886 |          |
| 250672_at   | A15g06910 | DnaJ homologue (qbAAB91418.1) : s DnaJ heat shock protein, putative (J6)             | 236  | 282  | 295  | 343  | 352  | 319  | 271  | 338  | 0.80     | 0.030557 | 207  | 228  | 269  | 350  | 294  | 243  | 280  | 264  | 235  | 286  | 0.82     | 0.108630 | 296      | 0.79     | 0.162547 |          |
| 250673_at   | A15g07070 | serine threonine kinase-like pr: CBL-interacting protein kinase 2 (CIPK2             | 42   | 47   | 57   | 62   | 63   | 49   | 61   | 80   | 0.70     | 0.076100 | 35   | 36   | 44   | 45   | 38   | 31   | 45   | 43   | 38   | 40   | 0.85     | 0.635441 | 38       | 1.01     | 0.031218 |          |
| 250674_at   | A15g07130 | laccase-like protein kinase - Populus laccase - putative / diphenol oxidase, put     | 56   | 63   | 72   | 72   | 74   | 81   | 64   | 76   | 0.84     | 0.091788 | 58   | 72   | 87   | 78   | 75   | 65   | 76   | 79   | 72   | 75   | 0.77     | 0.744499 | 73       | 0.99     | 0.962672 |          |
| 250640_at   | A15g07150 | putative protein kinase Xa21 - i leucine-rich repeat family protein                  | 13   | 19   | 21   | 20   | 23   | 19   | 18   | 20   | 0.87     | 0.401476 | 16   | 17   | 14   | 18   | 17   | 18   | 21   | 18   | 16   | 18   | 0.86     | 0.071781 | 18       | 0.90     | 0.137566 |          |
| 250641_at   | A15g07160 | putative bZIP protein bZIP protein HY5 bZIP family transcription factor              | 11   | 13   | 18   | 14   | 14   | 13   | 14   | 14   | 0.98     | 0.896709 | 9    | 13   | 11   | 10   | 11   | 11   | 9    | 20   | 11   | 12   | 0.89     | 0.651401 | 11       | 1.00     | 0.977967 |          |
| 250642_at   | A15g07180 | receptor-like protein kinase several rec leucine-rich repeat family protein / protei | 486  | 568  | 525  | 684  | 775  | 586  | 526  | 685  | 0.77     | 0.026404 | 237  | 184  | 278  | 398  | 350  | 281  | 308  | 267  | 233  | 319  | 0.73     | 0.062950 | 343      | 0.68     | 0.064753 |          |
| 250611_at   | A15g07200 | gibberellin 20-oxidase                                                               | 15   | 15   | 19   | 18   | 19   | 15   | 15   | 19   | 0.81     | 0.001050 | 13   | 13   | 19   | 15   | 20   | 17   | 13   | 10   | 17   | 0.91 | 0.537528 | 18       | 0.86     | 0.042472 |          |          |
| 250612_s_at | A15g07210 | putative protein ARR2 protein - Arabid 2o-component responsive regulator fan         | 22   | 24   | 26   | 29   | 30   | 30   | 24   | 29   | 0.81     | 0.006597 | 23   | 23   | 27   | 20   | 24   | 25   | 33   | 23   | 24   | 25   | 0.97     | 0.840507 | 23       | 1.05     | 0.546792 |          |
| 250613_at   | A15g07240 | putative protein SF16 protein, pollen s calciumulin-binding family protein           | 182  | 195  | 205  | 237  | 249  | 205  | 194  | 230  | 0.84     | 0.067500 | 204  | 230  | 222  | 339  | 251  | 199  | 269  | 261  | 219  | 264  | 0.83     | 0.187206 | 263      | 0.83     | 0.346570 |          |
| 250614_at   | A15g07260 | putative protein homeodomain protein- homeobox protein-related                       | 19   | 23   | 29   | 25   | 31   | 30   | 23   | 29   | 0.81     | 0.194249 | 17   | 19   | 18   | 15   | 19   | 21   | 25   | 17   | 18   | 20   | 0.92     | 0.538555 | 19       | 0.97     | 0.782537 |          |
| 250615_at   | A15g07270 | putative protein ankryrin - different sce ankryrin repeat family protein             | 205  | 227  | 230  | 337  | 255  | 253  | 299  | 265  | 0.85     | 0.305200 | 210  | 214  | 247  | 335  | 272  | 233  | 242  | 262  | 235  | 232  | 0.85     | 0.193225 | 279      | 0.80     | 0.146862 |          |
| 250616_at   | A15g07280 | receptor-like protein kinase-like protein leucine-rich reseat protein kinase, cutati | 1174 | 1408 | 1360 | 1436 | 1612 | 1210 | 1314 | 1419 | 0.93     | 0.484014 | 1313 | 1094 | 1329 | 1522 | 1468 | 1154 | 1396 | 1315 | 1245 | 1371 | 0.91     | 0.264635 | 1381     | 0.90     | 0.378646 |          |
| 250617_at   | A15g07290 | Mei2-like protein Mei2-like protein - Ar: RNA recognition motif (RRM)-containng      | 204  | 280  | 332  | 270  | 298  | 234  | 272  | 267  | 1.02     | 0.913481 | 134  | 127  | 144  | 143  | 137  | 131  | 164  | 166  | 135  | 148  | 0.91     | 0.23     |          |          |          |          |

|             |           |                                                                                      |      |      |      |      |      |      |      |      |          |          |          |      |      |      |      |      |      |      |      |      |          |          |          |          |          |          |
|-------------|-----------|--------------------------------------------------------------------------------------|------|------|------|------|------|------|------|------|----------|----------|----------|------|------|------|------|------|------|------|------|------|----------|----------|----------|----------|----------|----------|
| 250601_at   | A15g07810 | putative protein contains similarity to Hi-SNF2 domain-containing protein / helica   | 99   | 104  | 93   | 100  | 113  | 87   | 99   | 100  | 0.89     | 0.877423 | 79       | 60   | 95   | 81   | 83   | 62   | 75   | 72   | 78   | 74   | 1.05     | 0.707586 | 75       | 1.04     | 0.829699 |          |
| 250602_s_at | A15g07940 | unknown protein                                                                      | 231  | 290  | 296  | 336  | 355  | 279  | 272  | 323  | 0.84     | 0.174562 | 167      | 155  | 202  | 220  | 184  | 160  | 204  | 200  | 174  | 194  | 0.90     | 0.302522 | 188      | 0.93     | 0.572358 |          |
| 250603_at   | A15g07820 | autative protein mature parasite-infected expressed protein                          | 13   | 15   | 16   | 19   | 16   | 20   | 14   | 19   | 0.77     | 0.044637 | 10       | 14   | 13   | 21   | 16   | 14   | 15   | 18   | 12   | 17   | 0.73     | 0.082728 | 17       | 0.73     | 0.140056 |          |
| 250604_at   | A15g07800 | putative protein leucoradine precursor                                               | 76   | 113  | 120  | 135  | 231  | 224  | 103  | 245  | 0.42     | 0.224161 | 143      | 124  | 151  | 202  | 253  | 196  | 242  | 252  | 139  | 266  | 0.86     | 0.013385 | 248      | 0.86     | 0.134331 |          |
| 250607_at   | A15g07910 | putative protein desmin-180. Rattus no leucine-rich repeat family protein            | 91   | 118  | 130  | 155  | 170  | 140  | 113  | 155  | 0.73     | 0.044186 | 133      | 150  | 151  | 230  | 183  | 169  | 139  | 126  | 145  | 170  | 0.85     | 0.351779 | 194      | 0.75     | 0.063242 |          |
| 250578_at   | A15g07850 | proanthranilate N-benzoyltransferase - transferase family protein                    | 20   | 22   | 23   | 26   | 27   | 29   | 22   | 28   | 0.78     | 0.007657 | 18       | 28   | 23   | 16   | 12   | 14   | 18   | 15   | 14   | 23   | 15       | 1.54     | 0.101938 | 14       | 1.64     | 0.045085 |
| 250579_at   | A15g07930 | putative protein terminal ear1, Zea mae RNA recognition motif (RRM)-containing       | 20   | 24   | 25   | 22   | 30   | 28   | 23   | 27   | 0.88     | 0.272574 | 17       | 18   | 16   | 18   | 15   | 18   | 23   | 15   | 17   | 18   | 0.97     | 0.793707 | 17       | 1.02     | 0.757964 |          |
| 250540_at   | A15g07860 | N-hydroxymethyl benzoyltransferase transferase family protein                        | 103  | 120  | 127  | 135  | 109  | 118  | 127  | 0.53 | 0.469377 | 90       | 114      | 117  | 145  | 111  | 117  | 103  | 112  | 100  | 131  | 117  | 0.80     | 0.315549 | 122      | 0.88     | 0.316139 |          |
| 250550_at   | A15g07870 | N-hydroxycinnamoyl benzoyltransferase transferase family protein                     | 25   | 32   | 25   | 26   | 26   | 23   | 27   | 25   | 1.08     | 0.457391 | 22       | 33   | 25   | 21   | 19   | 23   | 26   | 25   | 26   | 23   | 1.15     | 0.275286 | 21       | 1.26     | 0.181774 |          |
| 250551_at   | A15g07880 | SNAP25 - like protein SNAP25A protei SNAP25 homologous protein, putative /           | 19   | 25   | 25   | 24   | 27   | 27   | 23   | 26   | 0.90     | 0.283265 | 19       | 25   | 26   | 23   | 23   | 17   | 31   | 24   | 23   | 24   | 0.99     | 0.926571 | 21       | 1.11     | 0.495341 |          |
| 250552_at   | A15g07890 | putative protein microtubule bindino or myosin heavy chain-related                   | 149  | 217  | 212  | 198  | 206  | 165  | 192  | 189  | 1.02     | 0.912573 | 187      | 157  | 173  | 233  | 191  | 169  | 188  | 181  | 172  | 192  | 0.90     | 0.281654 | 196      | 0.88     | 0.327293 |          |
| 250553_at   | A15g07860 | putative protein PTDO08. Homo sacae expressed protein                                | 586  | 725  | 755  | 792  | 900  | 728  | 689  | 807  | 0.85     | 0.177691 | 792      | 874  | 880  | 1162 | 959  | 899  | 883  | 904  | 849  | 981  | 0.88     | 0.168795 | 1007     | 0.84     | 0.134331 |          |
| 250554_at   | A15g07900 | unknown protein - supported by full-length mitochondrial transcription termination f | 100  | 136  | 140  | 125  | 141  | 155  | 127  | 122  | 141      | 0.86     | 0.046300 | 136  | 130  | 136  | 179  | 144  | 147  | 180  | 165  | 134  | 0.82     | 0.029525 | 157      | 0.85     | 0.115208 |          |
| 250555_at   | A15g07950 | putative protein ferrodoxin (ZFe-2S). A expressed protein                            | 76   | 111  | 125  | 103  | 122  | 91   | 104  | 106  | 0.98     | 0.926213 | 78       | 83   | 83   | 119  | 99   | 93   | 105  | 96   | 81   | 102  | 0.79     | 0.015266 | 104      | 0.78     | 0.051803 |          |
| 250556_at   | A15g07920 | diacylglycerol kinase (ATDGK1) : supoi diacylglycerol kinase 1 (DGK1)                | 111  | 119  | 165  | 184  | 195  | 160  | 132  | 180  | 0.73     | 0.072655 | 139      | 138  | 143  | 193  | 164  | 139  | 161  | 146  | 140  | 161  | 0.87     | 0.148895 | 165      | 0.85     | 0.178781 |          |
| 250557_at   | A15g07840 | putative protein ankyrin. Rattus norveg ankyrin repeat family protein                | 161  | 212  | 206  | 238  | 269  | 189  | 193  | 232  | 0.83     | 0.242551 | 177      | 185  | 181  | 256  | 211  | 184  | 230  | 214  | 181  | 219  | 0.83     | 0.055133 | 217      | 0.84     | 0.167006 |          |
| 250558_at   | A15g07990 | flavonoid 3-hydroxylase - like protein fl flavonoid 3'-monooxygenase / flavonoid     | 77   | 103  | 139  | 307  | 152  | 244  | 106  | 234  | 0.45     | 0.057224 | 368      | 316  | 409  | 535  | 208  | 277  | 256  | 363  | 321  | 1.13 | 0.605387 | 357      | 1.02     | 0.946237 |          |          |
| 250559_at   | A15g08010 | putative protein condensin subunit SM expressed protein                              | 123  | 165  | 182  | 216  | 207  | 163  | 157  | 195  | 0.80     | 0.182178 | 154      | 133  | 153  | 186  | 179  | 167  | 212  | 171  | 147  | 183  | 0.80     | 0.021787 | 217      | 0.83     | 0.024825 |          |
| 250560_at   | A15g08020 | replication factor A - like protein replica replication protein, putative            | 27   | 265  | 264  | 336  | 328  | 294  | 269  | 319  | 0.84     | 0.019554 | 194      | 176  | 233  | 293  | 245  | 206  | 236  | 228  | 201  | 242  | 0.83     | 0.126823 | 248      | 0.81     | 0.199509 |          |
| 250561_at   | A15g08030 | glycerophosphodiester phosphodiester glycerophosphoryl diester phosphodiester        | 29   | 67   | 42   | 41   | 50   | 35   | 43   | 42   | 1.02     | 0.945630 | 35       | 41   | 31   | 36   | 33   | 32   | 37   | 37   | 35   | 35   | 1.01     | 0.914616 | 34       | 1.05     | 0.645583 |          |
| 250562_at   | A15g08040 | putative protein - expressed protein                                                 | 1042 | 1163 | 1202 | 1310 | 1401 | 1252 | 1412 | 1321 | 0.86     | 0.054819 | 1278     | 1214 | 1414 | 1679 | 1437 | 1332 | 1348 | 1347 | 1302 | 1429 | 0.91     | 0.238551 | 1463     | 0.88     | 0.201115 |          |
| 250563_at   | A15g08050 | putative protein predicted protein. Arab expressed protein                           | 241  | 448  | 406  | 421  | 413  | 319  | 365  | 384  | 0.95     | 0.796348 | 438      | 516  | 519  | 738  | 509  | 545  | 549  | 513  | 491  | 571  | 0.86     | 0.322883 | 597      | 0.82     | 0.234073 |          |
| 250564_at   | A15g08060 | putative protein sioma factor F inhibito expressed protein                           | 273  | 377  | 322  | 388  | 403  | 364  | 324  | 385  | 0.84     | 0.129038 | 373      | 461  | 423  | 578  | 473  | 430  | 449  | 403  | 419  | 467  | 0.90     | 0.322150 | 494      | 0.85     | 0.213828 |          |
| 250565_at   | A15g08000 | putative protein various predicted orotil glycosyl hydrolase family protein 17       | 201  | 571  | 247  | 457  | 482  | 395  | 340  | 445  | 0.76     | 0.429170 | 474      | 656  | 586  | 422  | 325  | 365  | 465  | 467  | 572  | 409  | 1.40     | 0.023082 | 371      | 1.54     | 0.028544 |          |
| 250566_at   | A15g08070 | putative helix-coil helix DNA binding ; TCP family transcription factor, putative    | 27   | 22   | 27   | 21   | 20   | 22   | 22   | 21   | 1.01     | 0.922655 | 19       | 22   | 23   | 20   | 18   | 15   | 21   | 21   | 19   | 113  | 0.189752 | 17       | 1.23     | 0.074388 |          |          |
| 250567_at   | A15g08090 | hypothetical protein                                                                 | 46   | 52   | 58   | 63   | 69   | 63   | 52   | 65   | 0.80     | 0.029102 | 42       | 40   | 53   | 48   | 37   | 43   | 60   | 51   | 45   | 48   | 0.95     | 0.687494 | 43       | 1.06     | 0.655930 |          |
| 250568_at   | A15g08110 | putative protein several putative ATP-D DEAD/DEAH box helicase, putative             | 88   | 104  | 115  | 135  | 159  | 118  | 102  | 137  | 0.75     | 0.072129 | 74       | 66   | 83   | 92   | 93   | 65   | 100  | 81   | 74   | 86   | 0.86     | 0.218317 | 83       | 0.89     | 0.416827 |          |
| 250569_at   | A15g08130 | mvc-like protein mvc-like reulatory R. basic helix-loop-helix (bHLH) family vrot     | 180  | 240  | 210  | 303  | 340  | 235  | 210  | 293  | 0.72     | 0.079858 | 181      | 165  | 195  | 256  | 225  | 173  | 185  | 178  | 180  | 203  | 0.89     | 0.340054 | 218      | 0.83     | 0.214287 |          |
| 250570_at   | A15g08170 | putative protein hvothetical bacterial c porothromonas-lyce oecotri-amine-d          | 205  | 255  | 268  | 328  | 426  | 299  | 243  | 350  | 0.89     | 0.087465 | 349      | 392  | 336  | 574  | 465  | 396  | 387  | 376  | 359  | 440  | 0.82     | 0.146471 | 479      | 0.75     | 0.058373 |          |
| 250571_at   | A15g08200 | putative protein - expressed protein                                                 | 85   | 104  | 133  | 139  | 159  | 125  | 120  | 135  | 0.89     | 0.022711 | 95       | 91   | 98   | 116  | 105  | 99   | 112  | 119  | 120  | 105  | 0.91     | 0.252351 | 114      | 0.86     | 0.103246 |          |
| 250572_at   | A15g08210 | putative protein - expressed protein                                                 | 176  | 262  | 290  | 239  | 290  | 222  | 243  | 250  | 0.97     | 0.857567 | 243      | 206  | 204  | 308  | 234  | 305  | 266  | 218  | 263  | 0.83 | 0.156987 | 284      | 0.88     | 0.408326 |          |          |
| 250573_at   | A15g08220 | putative protein - expressed protein                                                 | 28   | 41   | 40   | 41   | 52   | 35   | 36   | 43   | 0.85     | 0.376431 | 32       | 27   | 31   | 34   | 35   | 24   | 41   | 39   | 30   | 34   | 0.87     | 0.308901 | 31       | 0.97     | 0.820993 |          |
| 250574_at   | A15g08230 | putative protein putative transcription f PWWP domain-containing protein             | 42   | 61   | 69   | 56   | 62   | 56   | 57   | 58   | 0.99     | 0.942596 | 50       | 47   | 52   | 54   | 54   | 50   | 53   | 52   | 50   | 51   | 0.99     | 0.828939 | 49       | 1.02     | 0.814568 |          |
| 250575_at   | A15g08240 | putative protein - expressed protein                                                 | 35   | 44   | 40   | 44   | 40   | 44   | 40   | 43   | 0.93     | 0.587765 | 30       | 36   | 36   | 35   | 32   | 31   | 34   | 32   | 31   | 34   | 1.07     | 0.250590 | 32       | 1.06     | 0.476569 |          |
| 250576_at   | A15g08250 | cytochrome P450-like protein several c cytochrome P450 family protein                | 16   | 23   | 25   | 24   | 25   | 23   | 21   | 24   | 0.87     | 0.317532 | 21       | 22   | 20   | 21   | 15   | 19   | 22   | 23   | 21   | 20   | 1.06     | 0.565823 | 18       | 1.14     | 0.239991 |          |
| 250542_at   | A15g08270 | hypothetical protein (fragment at BAC c expressed protein                            | 106  | 125  | 162  | 150  | 159  | 136  | 131  | 148  | 0.88     | 0.390566 | 124      | 129  | 149  | 165  | 144  | 135  | 162  | 141  | 134  | 149  | 0.90     | 0.176212 | 148      | 0.91     | 0.320362 |          |
| 250543_at   | A15g08190 | DR1-like protein TATA-binding protein TATA-binding protein-associated phospl         | 133  | 188  | 206  | 217  | 212  | 194  | 176  | 208  | 0.85     | 0.237881 | 177      | 199  | 205  | 282  | 191  | 200  | 199  | 213  | 194  | 217  | 0.89     | 0.344534 | 224      | 0.86     | 0.363205 |          |
| 250544_at   | A15g08050 | serine-threonine protein kinase - suppo serine/threonine protein kinase, putative    | 463  | 608  | 627  | 634  | 609  | 516  | 423  | 604  | 0.87     | 0.214367 | 490      | 444  | 475  | 684  | 551  | 488  | 598  | 577  | 470  | 580  | 0.81     | 0.045969 | 574      | 0.86     | 0.232852 |          |
| 250545_at   | A15g08160 | serine/threonine protein kinase - suppo serine/threonine protein kinase, putative    | 415  | 466  | 472  | 588  | 652  | 524  | 451  | 588  | 0.77     | 0.029184 | 448      | 420  | 482  | 678  | 590  | 492  | 550  | 526  | 450  | 567  | 0.79     | 0.036541 | 567      | 0.77     | 0.072419 |          |
| 250546_at   | A15g08180 | rheo-2 like protein high mobility group-lik ribosomal protein L7AeL30e/S12e/Gad      | 1066 | 1239 | 1318 | 1580 | 1522 | 1524 | 1208 | 1542 | 0.78     | 0.012224 | 835      | 1015 | 1206 | 1621 | 1134 | 1025 | 1217 | 1196 | 1018 | 1239 | 0.82     | 0.208549 | 1260     | 0.81     | 0.319008 |          |
| 250547_at   | A15g08100 | asparaginase : supported by cDNA. ci L-asparaginase / L-asparaginase amidohy         | 649  | 848  | 882  | 905  | 1136 | 829  | 793  | 957  | 0.83     | 0.235062 | 688      | 765  | 812  | 1052 | 936  | 829  | 874  | 879  | 754  | 914  | 0.83     | 0.032866 | 939      | 0.80     | 0.067583 |          |
| 250548_at   | A15g08120 | mvson heavy chain-like protein : suco mvson heavy chain-related                      | 1078 | 1437 | 1489 | 1518 | 1487 | 357  | 334  | 451  | 0.74     | 0.006968 | 391      | 384  | 432  | 627  | 525  | 482  | 514  | 458  | 402  | 514  | 0.78     | 0.038226 | 546      | 0.74     | 0.032866 |          |
| 250549_at   | A15g08260 | serine-type carboxypeptidase II-like pr serine carboxypeptidase S10 family prot      | 1024 | 1126 | 1115 | 2426 | 2427 | 2046 | 1088 | 2300 | 0.47     | 0.000755 | 940      | 308  | 876  | 2707 | 2025 | 1849 | 1955 | 1931 | 921  | 2091 | 0.44     | 0.014877 | 2489     | 0.42     | 0.003126 |          |
| 250519_at   | A15g08140 | Expressed protein ; supported by zinc finger (C3HC4-type RING finger) fa             | 153  | 239  | 260  | 279  | 291  | 210  | 218  | 260  | 0.84     | 0.359906 | 193      | 198  | 226  | 303  | 252  | 233  | 247  | 234  | 206  | 254  | 0.81     | 0.042402 | 262      | 0.78     | 0.070865 |          |
| 250519_at   | A15g08460 | fa GDSL-motif lipase/acetylhydrolase-like pi GDSL-motif lipase/hydrolase family prot | 48   | 66   | 88   | 79   | 79   | 77   | 67   | 78   | 0.86     | 0.384391 | 50       | 58   | 61   | 54   | 45   | 50   | 65   | 56   | 56   | 54   | 1.04     | 0.660434 | 50       | 1.13     | 0.197408 |          |
| 250520_at   | A15g08470 | putative protein contains similarity to A peroxisome biogenesis protein (PEX1)       | 83   | 89   | 95   | 96   | 112  | 83   | 82   | 97   | 0.85     | 0.322533 | 61       | 62   | 77   | 91   | 73   | 67   | 73   | 64   | 67   | 73   | 0.91     | 0.382234 | 77       | 0.87     | 0.309745 |          |
| 250521_at   | A15g08490 | selenium-binding protein-like - pentateicocysteine (PPR) repeat-containi             | 24   | 28   | 27   | 31   | 32   | 27   | 30   | 28   | 0.89     | 0.150647 | 22       | 25   | 28   | 27   | 28   | 25   | 28   | 27   | 28   | 27   | 1        |          |          |          |          |          |

|             |           |                                                                                     |      |      |      |      |      |      |      |      |           |          |      |      |      |      |      |      |      |      |      |      |          |          |          |          |          |          |
|-------------|-----------|-------------------------------------------------------------------------------------|------|------|------|------|------|------|------|------|-----------|----------|------|------|------|------|------|------|------|------|------|------|----------|----------|----------|----------|----------|----------|
| 250485_at   | A15g09990 | Expressed protein : supported by full-ile expressed protein                         | 156  | 203  | 222  | 290  | 322  | 262  | 193  | 291  | 0.66      | 0.019894 | 190  | 205  | 240  | 413  | 292  | 281  | 229  | 228  | 212  | 289  | 0.73     | 0.145792 | 329      | 0.64     | 0.058748 |          |
| 250454_at   | A15g09830 | unknown protein : supported by full-ile BoA-like family protein                     | 289  | 381  | 386  | 376  | 389  | 323  | 352  | 363  | 0.97      | 0.792391 | 356  | 397  | 378  | 514  | 386  | 362  | 395  | 380  | 377  | 407  | 0.93     | 0.444500 | 420      | 0.90     | 0.423905 |          |
| 250455_at   | A15g09980 | unknown protein : supported by full-ile expressed protein                           | 404  | 407  | 487  | 458  | 637  | 518  | 432  | 538  | 0.80      | 0.149821 | 271  | 275  | 315  | 388  | 325  | 327  | 366  | 371  | 387  | 356  | 0.81     | 0.013051 | 347      | 0.83     | 0.075370 |          |
| 250456_at   | A15g09990 | 26S proteasome subunit - like : sup 26S proteasome regulatory subunit, out          | 854  | 890  | 1029 | 1058 | 845  | 788  | 990  | 0.85 | 0.059106  | 784      | 643  | 725  | 1071 | 794  | 925  | 975  | 924  | 928  | 917  | 904  | 0.75     | 0.015281 | 963      | 0.76     | 0.069973 |          |
| 250459_at   | A15g09880 | solino factor-like protein : supported I RNA recognition motif (RRM)-containing     | 529  | 710  | 719  | 727  | 782  | 669  | 653  | 726  | 0.90      | 0.356054 | 550  | 613  | 594  | 760  | 600  | 555  | 569  | 573  | 586  | 611  | 0.96     | 0.640377 | 638      | 0.92     | 0.461724 |          |
| 250458_s_at | A15g09810 | ACTIN 27 (snpP53492) : supported by actin 7 (ACT7) / actin 2                        | 2075 | 2393 | 2468 | 3612 | 3646 | 3144 | 2312 | 3468 | 0.67      | 0.004610 | 2650 | 2674 | 2966 | 4008 | 3302 | 3000 | 2986 | 3047 | 2764 | 3268 | 0.85     | 0.109050 | 3437     | 0.80     | 0.099747 |          |
| 250459_at   | A15g09880 | unknown protein : supported by cDNA - nuclear 6-phosphate phosphatase, pu           | 1676 | 2307 | 211  | 230  | 240  | 206  | 194  | 225  | 0.86      | 0.155649 | 160  | 139  | 169  | 231  | 189  | 157  | 206  | 181  | 156  | 193  | 0.81     | 0.084473 | 192      | 0.81     | 0.195318 |          |
| 250460_at   | A15g10000 | putative protein similar to unknown protein transcription elongation factor-related | 200  | 229  | 339  | 329  | 326  | 220  | 230  | 309  | 0.72      | 0.058134 | 321  | 273  | 346  | 442  | 336  | 300  | 329  | 334  | 326  | 300  | 0.72     | 0.215089 | 369      | 0.74     | 0.061474 |          |
| 250461_at   | A15g10010 | hypothetical protein                                                                | 248  | 302  | 266  | 285  | 287  | 239  | 272  | 270  | 1.01      | 0.943470 | 207  | 233  | 207  | 233  | 209  | 218  | 204  | 277  | 243  | 216  | 250      | 0.86     | 0.236609 | 244      | 0.89     | 0.457929 |
| 250462_at   | A15g10020 | receptor protein kinase -like(fragment) leucine-rich repeat transmembrane prot      | 273  | 299  | 267  | 331  | 349  | 287  | 280  | 322  | 0.87      | 0.110275 | 210  | 177  | 231  | 284  | 243  | 194  | 257  | 247  | 206  | 245  | 0.84     | 0.137667 | 240      | 0.86     | 0.324015 |          |
| 250463_at   | A15g10030 | transcription factor OBf4                                                           | 37   | 48   | 62   | 66   | 53   | 48   | 60   | 0.80 | 0.1191910 | 27       | 29   | 34   | 44   | 35   | 33   | 40   | 36   | 30   | 38   | 0.80 | 0.050647 | 37       | 0.81     | 0.149472 |          |          |
| 250464_at   | A15g10040 | hypothetical protein                                                                | 25   | 30   | 45   | 42   | 43   | 53   | 33   | 45   | 0.80      | 0.072    | 22   | 23   | 27   | 33   | 27   | 35   | 26   | 24   | 24   | 26   | 0.85     | 0.735994 | 22       | 0.86     | 0.067092 |          |
| 250465_at   | A15g10070 | putative protein various predicted prot RNase L inhibitor protein-related           | 245  | 335  | 328  | 377  | 402  | 341  | 303  | 373  | 0.81      | 0.102657 | 366  | 362  | 384  | 546  | 425  | 426  | 356  | 347  | 371  | 420  | 0.88     | 0.343471 | 466      | 0.80     | 0.061075 |          |
| 250466_at   | A15g10090 | putative protein TETRATRICOPEPTID tetratricopeptide repeat (TPR)-containing         | 24   | 28   | 28   | 31   | 38   | 33   | 27   | 34   | 0.79      | 0.057050 | 20   | 20   | 25   | 26   | 17   | 19   | 40   | 26   | 22   | 26   | 0.84     | 0.486732 | 21       | 1.04     | 0.785379 |          |
| 250467_at   | A15g10100 | trehalase-6-phosphate phosphatase -II trehalase-6-phosphate phosphatase, pu         | 251  | 31   | 35   | 40   | 36   | 34   | 30   | 37   | 0.80      | 0.137970 | 29   | 33   | 35   | 34   | 32   | 28   | 35   | 35   | 33   | 33   | 0.99     | 0.886484 | 31       | 1.04     | 0.684304 |          |
| 250468_at   | A15g10120 | transcription factor TEIL/ethylene-insee ethylene insensitive 3 family protein      | 27   | 19   | 26   | 23   | 23   | 20   | 21   | 22   | 0.92      | 0.574349 | 5    | 14   | 7    | 11   | 9    | 8    | 9    | 8    | 9    | 9    | 0.97     | 0.908124 | 9        | 0.94     | 0.857949 |          |
| 250469_at   | A15g10130 | collen allergen -like protein SMT7 prot collen Ole 1 allergen and extensin fam      | 44   | 37   | 57   | 52   | 51   | 64   | 46   | 55   | 0.82      | 0.246456 | 23   | 19   | 32   | 27   | 22   | 31   | 44   | 25   | 33   | 0.75 | 0.242600 | 30       | 0.84     | 0.517538 |          |          |
| 250470_at   | A15g10160 | (3R)-hydroxymristov-1-acetyl carrier oro beta-hydroxylacv-AACP dehydratase, out     | 158  | 206  | 184  | 264  | 253  | 227  | 183  | 248  | 0.74      | 0.020744 | 207  | 220  | 227  | 391  | 274  | 233  | 247  | 230  | 218  | 275  | 0.79     | 0.209433 | 299      | 0.73     | 0.164919 |          |
| 250471_at   | A15g10170 | mvo-inositol-1-phosphate synthase -lik inositol-3-phosphate synthase, putative      | 36   | 48   | 50   | 49   | 53   | 40   | 45   | 47   | 0.95      | 0.698460 | 46   | 53   | 44   | 36   | 35   | 36   | 36   | 37   | 48   | 36   | 1.33     | 0.000763 | 36       | 1.34     | 0.009162 |          |
| 250472_at   | A15g10210 | putative protein                                                                    | 15   | 19   | 18   | 20   | 23   | 21   | 17   | 21   | 0.82      | 0.054540 | 17   | 15   | 15   | 16   | 16   | 16   | 21   | 18   | 16   | 17   | 0.91     | 0.314582 | 16       | 0.99     | 0.832104 |          |
| 250473_at   | A15g10220 | annexin -like protein annexin (AnnA2) annexin 6 (ANN6)                              | 16   | 20   | 29   | 9    | 7    | 13   | 21   | 10   | 2.18      | 0.046700 | 18   | 23   | 18   | 13   | 10   | 13   | 10   | 20   | 11   | 1.83 | 0.001564 | 10       | 1.91     | 0.000589 |          |          |
| 250474_at   | A15g10230 | annexin -like protein annexin (AnnA2) annexin 7 (ANN7)                              | 19   | 19   | 20   | 16   | 15   | 15   | 19   | 16   | 1.24      | 0.000590 | 11   | 10   | 17   | 12   | 11   | 13   | 15   | 12   | 12   | 10   | 0.90     | 0.995311 | 11       | 1.11     | 0.612424 |          |
| 250475_at   | A15g10180 | sulfate transporter : supported by cDN sulfate transporter                          | 38   | 46   | 63   | 63   | 70   | 60   | 49   | 64   | 0.76      | 0.120992 | 33   | 36   | 38   | 35   | 32   | 31   | 44   | 46   | 36   | 38   | 0.94     | 0.608134 | 33       | 1.08     | 0.225986 |          |
| 250476_at   | A15g10140 | MADS box protein FLOWERING LOCUL MADS-box protein flowering locus F (FL             | 30   | 41   | 47   | 50   | 49   | 47   | 39   | 49   | 0.81      | 0.134227 | 30   | 29   | 42   | 34   | 33   | 33   | 32   | 30   | 34   | 33   | 1.03     | 0.738297 | 34       | 1.00     | 0.986554 |          |
| 250477_at   | A15g10190 | putative protein CIS-CIS-MUCONATE transporter-related                               | 77   | 90   | 99   | 97   | 112  | 80   | 89   | 96   | 0.92      | 0.530037 | 53   | 52   | 60   | 75   | 61   | 66   | 66   | 64   | 55   | 66   | 0.83     | 0.022473 | 67       | 0.82     | 0.068681 |          |
| 250478_at   | A15g10250 | non-photocytoc hypocytv 3-like protein photocytoc-responsive protein, putative      | 14   | 11   | 13   | 16   | 15   | 13   | 13   | 15   | 0.86      | 0.229700 | 11   | 15   | 13   | 13   | 13   | 12   | 17   | 13   | 13   | 14   | 0.97     | 0.796518 | 13       | 1.02     | 0.818186 |          |
| 250479_at   | A15g10260 | GTP-binding protein GTP-binding prot Ras-related GTP-binding protein, putati        | 34   | 40   | 50   | 37   | 37   | 39   | 41   | 38   | 1.09      | 0.480288 | 30   | 42   | 32   | 28   | 25   | 22   | 39   | 30   | 35   | 29   | 1.21     | 0.258070 | 25       | 1.39     | 0.071732 |          |
| 250480_at   | A15g10290 | protein serine/threonine kinase-like rc leucine-rich repeat family protein / protei | 134  | 196  | 171  | 181  | 219  | 189  | 167  | 196  | 0.85      | 0.243081 | 119  | 100  | 133  | 161  | 122  | 111  | 140  | 133  | 118  | 133  | 0.88     | 0.287836 | 131      | 0.89     | 0.485050 |          |
| 250481_at   | A15g10310 | putative protein                                                                    | 44   | 37   | 41   | 43   | 41   | 40   | 42   | 0.96 | 0.451303  | 62       | 70   | 64   | 91   | 64   | 84   | 87   | 77   | 65   | 77   | 0.85 | 0.189880 | 73       | 0.89     | 0.447070 |          |          |
| 250482_at   | A15g10320 | alpha-helical expressed protein                                                     | 83   | 149  | 129  | 149  | 129  | 149  | 129  | 149  | 0.87      | 0.058118 | 124  | 124  | 129  | 149  | 129  | 149  | 129  | 149  | 129  | 149  | 0.72     | 0.005801 | 149      | 0.81     | 0.242841 |          |
| 250483_at   | A15g10330 | alpha-hydroxynitrile lyase-like protein / hydroxal, alpha/beta fold family protein  | 88   | 114  | 134  | 106  | 79   | 77   | 112  | 87   | 1.29      | 0.199607 | 222  | 253  | 247  | 269  | 201  | 189  | 259  | 247  | 240  | 233  | 1.03     | 0.754553 | 219      | 1.10     | 0.475287 |          |
| 250484_at   | A15g10420 | asparagine synthetase ASN3 : support asparagine synthetase 3 (ASN3)                 | 218  | 249  | 283  | 350  | 332  | 286  | 250  | 323  | 0.78      | 0.054259 | 204  | 172  | 196  | 296  | 233  | 208  | 197  | 224  | 191  | 232  | 0.82     | 0.137768 | 246      | 0.78     | 0.118073 |          |
| 250485_at   | A15g10280 | putative protein trans factor MYB92 : a myb family transcription factor (MYB92)     | 17   | 21   | 23   | 22   | 20   | 23   | 20   | 22   | 0.94      | 0.547785 | 19   | 24   | 26   | 19   | 16   | 21   | 15   | 20   | 23   | 18   | 1.25     | 0.061272 | 19       | 1.22     | 0.154609 |          |
| 250486_at   | A15g10270 | cdc2-like protein by cdc2-like prot cyclin-dependent kinase, putative / CDK         | 202  | 237  | 257  | 275  | 313  | 261  | 232  | 283  | 0.82      | 0.082969 | 208  | 182  | 212  | 264  | 229  | 194  | 251  | 232  | 200  | 234  | 0.86     | 0.090500 | 229      | 0.87     | 0.266904 |          |
| 250487_at   | A15g10630 | putative protein KIAA1039 protein. Hoi expressed protein // elongation factor 1-    | 128  | 161  | 167  | 182  | 223  | 140  | 152  | 182  | 0.84      | 0.334584 | 125  | 115  | 131  | 173  | 143  | 133  | 149  | 150  | 132  | 150  | 0.82     | 0.027596 | 150      | 0.82     | 0.098443 |          |
| 250488_at   | A15g10620 | putative protein predicted protein. Baci expressed protein                          | 76   | 101  | 100  | 103  | 129  | 95   | 92   | 109  | 0.85      | 0.286848 | 81   | 98   | 91   | 110  | 106  | 103  | 108  | 102  | 90   | 101  | 0.89     | 0.162807 | 99       | 0.91     | 0.386476 |          |
| 250423_s_at | A15g10610 | cytochrome P450 - like protein cytochr cytochrome P450 family protein // cyto       | 67   | 94   | 119  | 122  | 148  | 101  | 93   | 124  | 0.75      | 0.207411 | 102  | 114  | 93   | 161  | 136  | 115  | 147  | 128  | 103  | 137  | 0.75     | 0.024362 | 137      | 0.75     | 0.081130 |          |
| 250424_at   | A15g10610 | putative protein - like bromodomain DNA-binding bromodomain-containing p            | 109  | 1019 | 881  | 1219 | 1364 | 877  | 909  | 1187 | 0.77      | 0.092310 | 720  | 633  | 769  | 1023 | 749  | 817  | 810  | 779  | 810  | 823  | 0.87     | 0.217062 | 810      | 0.85     | 0.022813 |          |
| 250425_at   | A15g10610 | lectin-like protein kinase - like lectin-lik lectin protein kinase, putative        | 20   | 28   | 24   | 26   | 28   | 18   | 24   | 24   | 1.00      | 0.990498 | 21   | 25   | 23   | 25   | 22   | 26   | 23   | 23   | 24   | 29   | 0.97     | 0.549826 | 23       | 0.99     | 0.854672 |          |
| 250426_at   | A15g10510 | ovule development protein - like ovule ovule development protein, putative          | 43   | 61   | 54   | 87   | 81   | 77   | 53   | 82   | 0.64      | 0.008630 | 50   | 47   | 56   | 74   | 67   | 58   | 54   | 59   | 51   | 63   | 0.82     | 0.061944 | 67       | 0.77     | 0.039405 |          |
| 250427_at   | A15g10500 | putative protein mvoin heavy chain cvt kinase interacting family protein            | 30   | 20   | 35   | 30   | 26   | 32   | 28   | 29   | 0.97      | 0.885267 | 17   | 22   | 29   | 24   | 16   | 18   | 30   | 26   | 23   | 23   | 0.99     | 0.960501 | 19       | 1.16     | 0.495332 |          |
| 250428_at   | A15g10480 | putative protein phosphatase prot h1b krosine phosphatase-like protein              | 686  | 754  | 1026 | 112  | 988  | 1046 | 768  | 717  | 0.74      | 0.007253 | 637  | 674  | 716  | 843  | 713  | 840  | 735  | 731  | 713  | 840  | 0.85     | 0.257981 | 890      | 0.80     | 0.249603 |          |
| 250429_at   | A15g10470 | putative protein TH65 protein, Arabidopsis thaliana motor protein-related           | 159  | 174  | 169  | 178  | 186  | 159  | 156  | 184  | 0.85      | 0.212018 | 128  | 116  | 156  | 137  | 159  | 184  | 156  | 159  | 184  | 156  | 0.84     | 0.185200 | 164      | 0.81     | 0.242841 |          |
| 250430_at   | A15g10460 | putative protein haloacid dehalogenase-like hydrolase fa                            | 252  | 353  | 348  | 298  | 343  | 276  | 313  | 305  | 1.02      | 0.849331 | 247  | 292  | 291  | 307  | 323  | 293  | 314  | 303  | 277  | 321  | 0.86     | 0.078325 | 329      | 0.84     | 0.124643 |          |
| 250431_at   | A15g10440 | putative protein - like cyclin D2 1 protein, cyclin family protein                  | 77   | 84   | 98   | 75   | 85   | 73   | 86   | 78   | 1.11      | 0.291512 | 60   | 57   | 66   | 78   | 63   | 65   | 73   | 61   | 61   | 68   | 0.90     | 0.196076 | 69       | 0.89     | 0.239273 |          |
| 250432_at   | A15g10420 | putative protein various predicted prot rpin family protein, putative               | 30   | 47   | 49   | 48   | 44   | 43   | 42   | 45   | 0.94      | 0.695585 | 30   | 36   | 44   | 38   | 33   | 30   | 37   | 36   | 37   | 35   | 1.05     | 0.653066 | 34       | 1.09     | 0.555482 |          |
| 250433_at   | A15g10400 | histone H3 - like protein histone H3, Ar histone H3                                 | 1475 | 1700 | 2157 | 2252 | 2007 | 1763 | 2152 | 0.81 | 0.070719  | 1632     | 1576 | 1768 | 1632 | 1576 | 1768 | 1632 | 1576 | 1768 | 1632 | 1576 | 0.80     | 0.294453 | 1954     | 0.85     | 0.205609 |          |
| 250434_at   | A15g10390 | histone H3 - like protein histone H3, Ar histone H3                                 | 759  | 880  | 768  | 1025 | 1016 | 941  | 802  | 994  |           |          |      |      |      |      |      |      |      |      |      |      |          |          |          |          |          |          |

|             |           |                                           |                                           |      |      |      |      |      |      |      |      |          |          |      |      |      |      |      |      |      |      |      |          |          |          |          |          |          |
|-------------|-----------|-------------------------------------------|-------------------------------------------|------|------|------|------|------|------|------|------|----------|----------|------|------|------|------|------|------|------|------|------|----------|----------|----------|----------|----------|----------|
| 250390_at   | A15g11340 | separation anxiety protein - like separa  | GN5-related N-acetyltransferase (GNA      | 359  | 458  | 462  | 521  | 588  | 462  | 427  | 524  | 0.81     | 0.122330 | 424  | 499  | 493  | 737  | 524  | 478  | 472  | 461  | 472  | 534      | 0.88     | 0.413856 | 579      | 0.81     | 0.265923 |
| 250399_at   | A15g11350 | putative protein predicted proteins. Ar   | endonuclease/exonuclease/phosphatase      | 159  | 200  | 230  | 212  | 247  | 186  | 196  | 215  | 0.91     | 0.530358 | 159  | 145  | 178  | 202  | 173  | 142  | 181  | 174  | 161  | 174      | 0.92     | 0.390506 | 172      | 0.93     | 0.600812 |
| 250369_at   | A15g11360 | outative protein probable serine/threon   | expressed protein                         | 132  | 301  | 453  | 247  | 258  | 213  | 402  | 239  | 1.68     | 0.035888 | 386  | 431  | 392  | 375  | 253  | 237  | 282  | 275  | 403  | 284      | 1.42     | 0.012461 | 288      | 1.40     | 0.060701 |
| 250381_at   | A15g11370 | putative protein various predicted prot   | senescence-associated protein-related     | 29   | 47   | 36   | 53   | 36   | 32   | 34   | 36   | 0.84     | 0.380352 | 51   | 49   | 56   | 24   | 31   | 28   | 29   | 27   | 29   | 26       | 0.92     | 0.499116 | 29       | 0.96     | 0.653085 |
| 250370_at   | A15g11380 | 1-D-deoxyxylulose 5-phosphate synth       | 1-deoxy-D-xylulose 5-phosphate synth      | 433  | 147  | 165  | 193  | 194  | 171  | 149  | 186  | 0.80     | 0.035978 | 106  | 108  | 140  | 157  | 133  | 111  | 142  | 132  | 118  | 135      | 0.87     | 0.220237 | 134      | 0.88     | 0.401516 |
| 250363_at   | A15g11390 | putative protein predicted proteins. On   | expressed protein                         | 161  | 190  | 241  | 225  | 225  | 193  | 197  | 214  | 0.92     | 0.540436 | 132  | 145  | 175  | 217  | 162  | 137  | 189  | 198  | 150  | 181      | 0.83     | 0.198536 | 172      | 0.87     | 0.465334 |
| 250364_at   | A15g11400 | putative protein serine threonine tyrosi  | protein kinase-related                    | 18   | 35   | 27   | 29   | 28   | 24   | 27   | 27   | 0.99     | 0.952434 | 19   | 18   | 26   | 21   | 19   | 24   | 25   | 19   | 21   | 22       | 0.97     | 0.778019 | 21       | 0.98     | 0.878450 |
| 250365_at   | A15g11410 | putative protein probable protein kinase  | family protein                            | 2    | 11   | 7    | 10   | 8    | 7    | 11   | 10   | 0.84     | 0.040232 | 12   | 13   | 12   | 11   | 13   | 11   | 9    | 10   | 12   | 13       | 0.98     | 0.921881 | 10       | 0.98     | 0.046156 |
| 250366_at   | A15g11420 | putative protein predicted proteins in c  | expressed protein                         | 50   | 63   | 74   | 71   | 66   | 67   | 62   | 68   | 0.91     | 0.443939 | 61   | 55   | 65   | 65   | 55   | 61   | 61   | 60   | 59   | 59       | 1.02     | 0.793849 | 58       | 1.04     | 0.662963 |
| 250367_s_at | A15g11430 | DEAD BOX RNA helicase RH15 : suot         | DEAD/DEAH box helicase. outative (RH      | 1427 | 1829 | 1681 | 1847 | 2080 | 1510 | 1646 | 1813 | 0.91     | 0.457330 | 1484 | 1365 | 1419 | 1804 | 1616 | 1487 | 1628 | 1607 | 1422 | 1628     | 0.87     | 0.029204 | 1636     | 0.87     | 0.096302 |
| 250368_at   | A15g11280 | putative protein : supported by cDNA : e  | expressed protein                         | 503  | 657  | 672  | 673  | 777  | 613  | 610  | 688  | 0.89     | 0.343001 | 683  | 768  | 751  | 1098 | 887  | 790  | 798  | 763  | 734  | 867      | 0.85     | 0.163795 | 925      | 0.79     | 0.113740 |
| 250369_at   | A15g11300 | ovdin b3 : supported by cDNA: ai 600      | cyclin. putative (CYC3b)                  | 40   | 47   | 45   | 53   | 56   | 49   | 44   | 53   | 0.84     | 0.380352 | 51   | 49   | 56   | 24   | 31   | 28   | 29   | 27   | 29   | 26       | 0.92     | 0.775772 | 54       | 0.96     | 0.758654 |
| 250370_at   | A15g11430 | putative protein putative transcription   | e transcription elongation factor-related | 91   | 99   | 114  | 142  | 141  | 111  | 101  | 131  | 0.77     | 0.057614 | 77   | 67   | 87   | 104  | 89   | 70   | 101  | 95   | 77   | 92       | 0.84     | 0.157211 | 88       | 0.88     | 0.405244 |
| 250371_at   | A15g11450 | putative protein 32 kDa polypeptide of    | oxygen-evolving complex-related           | 237  | 375  | 351  | 324  | 368  | 283  | 321  | 325  | 0.99     | 0.941488 | 375  | 370  | 392  | 400  | 359  | 397  | 382  | 369  | 379  | 400      | 0.95     | 0.539611 | 415      | 0.91     | 0.407232 |
| 250372_at   | A15g11460 | putative protein various predicted prot   | senescence-associated protein-related     | 55   | 78   | 91   | 118  | 129  | 116  | 74   | 121  | 0.62     | 0.014010 | 77   | 70   | 78   | 119  | 104  | 92   | 80   | 72   | 75   | 93       | 0.81     | 0.155846 | 105      | 0.72     | 0.022112 |
| 250373_at   | A15g11470 | putative protein L bromo-adjacent homol   | ogy (BAH) domain                          | 60   | 75   | 83   | 98   | 111  | 80   | 73   | 96   | 0.75     | 0.102298 | 52   | 53   | 65   | 71   | 69   | 60   | 54   | 66   | 56   | 64       | 0.88     | 0.183391 | 67       | 0.85     | 0.134712 |
| 250374_at   | A15g11530 | putative protein                          |                                           | 104  | 154  | 148  | 135  | 146  | 118  | 135  | 133  | 1.01     | 0.927753 | 89   | 91   | 102  | 129  | 97   | 83   | 100  | 95   | 94   | 101      | 0.93     | 0.528770 | 103      | 0.91     | 0.545972 |
| 250375_at   | A15g11540 | putative protein L-luloano-gamma-lact     | FAD-binding domain-containing protein     | 75   | 82   | 99   | 67   | 78   | 53   | 85   | 66   | 1.29     | 0.129297 | 80   | 86   | 76   | 39   | 43   | 40   | 42   | 41   | 80   | 41       | 1.96     | 0.000004 | 41       | 1.97     | 0.000305 |
| 250376_at   | A15g11550 | putative protein                          |                                           | 223  | 287  | 316  | 378  | 458  | 356  | 275  | 398  | 0.69     | 0.042111 | 321  | 363  | 356  | 580  | 427  | 390  | 430  | 419  | 346  | 449      | 0.77     | 0.065044 | 466      | 0.74     | 0.116487 |
| 250377_at   | A15g11560 | putative protein predicted proteins. Ho   | POC enzyme repeat-containing protein      | 634  | 757  | 687  | 827  | 854  | 661  | 692  | 781  | 0.89     | 0.277365 | 570  | 469  | 600  | 720  | 608  | 491  | 606  | 590  | 546  | 603      | 0.91     | 0.353268 | 606      | 0.90     | 0.479291 |
| 250378_at   | A15g11570 | putative oligopeptide transporter prot    | tein-dependent oligopeptide transport     | 157  | 202  | 187  | 251  | 167  | 182  | 214  | 0.85 | 0.323751 | 21       | 17   | 20   | 20   | 18   | 15   | 36   | 22   | 19   | 22   | 0.87     | 0.579031 | 17       | 1.10     | 0.434814 |          |
| 250379_at   | A15g11590 | transcription factor like protein transcr | ip2 domain-containing transcription fac   | 22   | 26   | 34   | 31   | 37   | 29   | 27   | 33   | 0.84     | 0.287599 | 18   | 17   | 26   | 21   | 15   | 23   | 31   | 21   | 21   | 22       | 0.92     | 0.673440 | 20       | 1.04     | 0.850720 |
| 250380_at   | A15g11600 | putative protein                          | expressed protein                         | 22   | 31   | 34   | 58   | 51   | 33   | 29   | 47   | 0.61     | 0.088148 | 46   | 47   | 51   | 95   | 66   | 60   | 74   | 68   | 48   | 73       | 0.66     | 0.024095 | 74       | 0.65     | 0.080343 |
| 250381_at   | A15g11610 | outative protein various predicted prot   | exonin5 family protein                    | 13   | 14   | 19   | 14   | 16   | 19   | 15   | 16   | 0.94     | 0.681004 | 12   | 13   | 17   | 12   | 14   | 12   | 16   | 11   | 14   | 13       | 1.10     | 0.431368 | 12       | 1.13     | 0.346204 |
| 250382_at   | A15g11580 | putative protein rs protein. Mus muscu    | LVB-resistance protein-related / regulat  | 223  | 365  | 340  | 360  | 452  | 302  | 309  | 371  | 0.83     | 0.371984 | 425  | 327  | 232  | 317  | 277  | 249  | 307  | 290  | 231  | 288      | 0.80     | 0.012359 | 281      | 0.82     | 0.067102 |
| 250383_at   | A15g11480 | putative GTP-binding protein              | GTP-binding protein                       | 236  | 328  | 288  | 384  | 401  | 318  | 284  | 367  | 0.77     | 0.081940 | 289  | 329  | 336  | 505  | 377  | 351  | 332  | 332  | 318  | 379      | 0.84     | 0.217210 | 411      | 0.77     | 0.136122 |
| 250384_at   | A15g11500 | putative protein various predicted prot   | expressed protein                         | 745  | 1021 | 1007 | 1076 | 1149 | 926  | 925  | 1050 | 0.88     | 0.321061 | 941  | 1151 | 1084 | 1375 | 1101 | 1008 | 1009 | 988  | 1059 | 1098     | 0.97     | 0.741237 | 1161     | 0.91     | 0.467525 |
| 250385_at   | A15g11520 | aspartate aminotransferase (Asp3) : s     | u aspartate aminotransferase. chloroplast | 402  | 480  | 469  | 471  | 526  | 409  | 450  | 469  | 0.96     | 0.684250 | 409  | 406  | 441  | 539  | 482  | 409  | 438  | 440  | 419  | 462      | 0.91     | 0.218916 | 477      | 0.88     | 0.215176 |
| 250386_at   | A15g11510 | MYB like protein MYB like protein. Dic    | mib family transcription factor (MYB3R4   | 163  | 223  | 215  | 230  | 252  | 193  | 207  | 225  | 0.92     | 0.444013 | 160  | 120  | 163  | 195  | 163  | 131  | 148  | 151  | 148  | 158      | 0.94     | 0.580594 | 163      | 0.90     | 0.533627 |
| 250382_at   | A15g11490 | beta-actin-like protein A : supported     | beta-actin family protein                 | 428  | 563  | 528  | 662  | 658  | 514  | 502  | 579  | 0.83     | 0.011427 | 391  | 338  | 481  | 602  | 486  | 467  | 514  | 402  | 469  | 503      | 0.82     | 0.154917 | 473      | 0.85     | 0.230379 |
| 250383_at   | A15g11630 | putative protein predicted proteins. Ar   | expressed protein                         | 356  | 483  | 450  | 471  | 523  | 469  | 430  | 487  | 0.88     | 0.241230 | 506  | 549  | 570  | 753  | 654  | 530  | 608  | 562  | 542  | 633      | 0.86     | 0.079442 | 665      | 0.81     | 0.073081 |
| 250384_at   | A15g11640 | putative protein predicted proteins. Dir  | glycine-rich protein // expressed protein | 274  | 326  | 337  | 412  | 414  | 339  | 312  | 388  | 0.80     | 0.073590 | 243  | 293  | 315  | 449  | 332  | 338  | 277  | 289  | 283  | 337      | 0.84     | 0.264177 | 373      | 0.76     | 0.108612 |
| 250385_at   | A15g11700 | putative protein predicted protein. Arai  | glycine-rich protein                      | 265  | 372  | 357  | 417  | 431  | 345  | 331  | 398  | 0.83     | 0.153355 | 223  | 204  | 220  | 301  | 234  | 233  | 274  | 249  | 216  | 258      | 0.84     | 0.055388 | 256      | 0.84     | 0.157694 |
| 250386_at   | A15g11710 | clathrin binding protein - like A1F0-ord  | exin N-terminal homology (ENTH) dom       | 292  | 333  | 314  | 426  | 430  | 316  | 313  | 391  | 0.80     | 0.117693 | 277  | 234  | 276  | 363  | 316  | 270  | 289  | 263  | 300  | 317      | 0.87     | 0.199750 | 317      | 0.83     | 0.146677 |
| 250387_at   | A15g11730 | outative protein various predicted prot   | senescence-associated protein             | 175  | 230  | 276  | 267  | 325  | 236  | 227  | 276  | 0.82     | 0.27840  | 232  | 247  | 211  | 319  | 270  | 240  | 323  | 305  | 230  | 292      | 0.79     | 0.033320 | 277      | 0.83     | 0.137428 |
| 250388_at   | A15g11740 | outative protein abberilenn-resonsive     | arabinogalactan-protein (AGP15)           | 4063 | 3251 | 4178 | 4352 | 5202 | 4239 | 3814 | 4597 | 0.83     | 0.132013 | 4473 | 4868 | 4495 | 5501 | 4403 | 4198 | 5465 | 5304 | 4612 | 4974     | 0.93     | 0.380728 | 4701     | 0.98     | 0.844057 |
| 250328_at   | A15g11780 | putative protein                          | expressed protein                         | 103  | 126  | 128  | 157  | 170  | 142  | 119  | 157  | 0.76     | 0.028527 | 105  | 96   | 121  | 160  | 119  | 106  | 107  | 122  | 0.88 | 0.347027 | 128      | 0.84     | 0.304777 |          |          |
| 250329_at   | A15g11800 | putative potassium transport protein ai   | K+ efflux antiporter, putative (KEA6)     | 157  | 202  | 187  | 222  | 253  | 167  | 182  | 214  | 0.85     | 0.323755 | 149  | 138  | 148  | 209  | 172  | 157  | 184  | 169  | 145  | 176      | 0.82     | 0.102273 | 176      | 0.82     | 0.035673 |
| 250330_at   | A15g11810 | putative protein                          | expressed protein                         | 336  | 400  | 385  | 489  | 537  | 426  | 374  | 484  | 0.77     | 0.042260 | 389  | 391  | 444  | 633  | 511  | 473  | 463  | 445  | 408  | 505      | 0.81     | 0.084019 | 539      | 0.76     | 0.063611 |
| 250331_at   | A15g11820 | outative protein self-incompatibilit      | pro expressed protein                     | 14   | 14   | 18   | 19   | 17   | 15   | 15   | 17   | 0.87     | 0.260705 | 11   | 15   | 13   | 13   | 15   | 13   | 13   | 11   | 13   | 13       | 1.01     | 0.942276 | 14       | 0.97     | 0.785004 |
| 250332_at   | A15g11860 | putative protein predicted proteins. Ar   | expressed protein                         | 216  | 264  | 296  | 305  | 339  | 273  | 259  | 305  | 0.85     | 0.196516 | 312  | 350  | 299  | 415  | 335  | 306  | 328  | 296  | 320  | 336      | 0.95     | 0.622398 | 352      | 0.91     | 0.429206 |
| 250333_at   | A15g11690 | membrane translocase - like protein in    | mitochondrial inner membrane tr:          | 210  | 282  | 309  | 282  | 288  | 386  | 305  | 280  | 0.90     | 0.150959 | 237  | 249  | 268  | 283  | 280  | 281  | 245  | 300  | 282  | 313      | 0.78     | 0.052773 | 313      | 0.78     | 0.068273 |
| 250334_at   | A15g11770 | NADH dehydrogenase (ubiquinone) : s       | NADH-ubiquinone oxidoreductase 20 kC      | 1084 | 1196 | 1416 | 1616 | 1507 | 1262 | 1053 | 1365 | 0.75     | 0.045680 | 1280 | 1525 | 1351 | 2034 | 1484 | 1469 | 1420 | 1357 | 1552 | 1683     | 0.89     | 0.355072 | 1663     | 0.93     | 0.248699 |
| 250335_at   | A15g11670 | lysophospholipase - like protein lysoph   | oliphase, alpha/beta fold family protein  | 319  | 333  | 385  | 434  | 466  | 366  | 346  | 422  | 0.82     | 0.100266 | 207  | 254  | 239  | 326  | 214  | 207  | 261  | 243  | 233  | 250      | 0.93     | 0.588759 | 249      | 0.94     | 0.715040 |
| 250336_at   | A15g11720 | alpha-glucosidase - 1 : supported by cD   | alpha-glucosidase 1 (AGLU1)               | 164  | 228  | 219  | 246  | 288  | 212  | 204  | 248  | 0.82     | 0.205512 | 156  | 164  | 179  | 246  | 208  | 170  | 205  | 208  | 166  | 207      | 0.80     | 0.050775 | 208      | 0.80     | 0.146011 |
| 250337_at   | A15g11790 | outative protein SF21 protein. Helianth   | NR family protein                         | 70   | 92   | 98   | 107  | 102  | 91   | 86   | 100  | 0.86     | 0.241483 | 74   | 84   | 110  | 111  | 102  | 97   | 106  | 97   | 93   | 103      | 0.90     | 0.289218 | 103      | 0.90     | 0.397946 |
| 250338_at   | A15g11760 |                                           |                                           |      |      |      |      |      |      |      |      |          |          |      |      |      |      |      |      |      |      |      |          |          |          |          |          |          |

|             |           |                                                                                            |      |      |      |      |      |      |      |      |          |          |          |      |      |      |      |      |      |      |      |      |      |          |          |      |          |          |
|-------------|-----------|--------------------------------------------------------------------------------------------|------|------|------|------|------|------|------|------|----------|----------|----------|------|------|------|------|------|------|------|------|------|------|----------|----------|------|----------|----------|
| 250270_at   | A15g12980 | putative protein FL10, EGF responsive rcd1-like cell differentiation protein, puta         | 286  | 321  | 339  | 344  | 373  | 329  | 315  | 349  | 0.0      | 0.172171 | 295      | 372  | 393  | 489  | 369  | 355  | 379  | 353  | 353  | 389  | 0.91 | 0.411018 | 404      | 0.87 | 0.381452 |          |
| 250271_at   | A15g12990 | putative protein predicted protein, Araf. CLE40, putative                                  | 18   | 20   | 21   | 15   | 21   | 19   | 20   | 18   | 1.06     | 0.581576 | 17       | 21   | 20   | 13   | 14   | 17   | 19   | 16   | 19   | 16   | 1.22 | 0.090846 | 15       | 1.33 | 0.055316 |          |
| 250272_at   | A15g13000 | callose synthase catalytic subunit -like glycosyl transferase family 48 protein            | 1560 | 1961 | 1961 | 2098 | 2396 | 1791 | 1827 | 2095 | 0.87     | 0.291136 | 1354     | 1151 | 1442 | 1837 | 1660 | 1281 | 1745 | 1683 | 1316 | 1641 | 0.80 | 0.081373 | 1593     | 0.83 | 0.209616 |          |
| 250273_at   | A15g13010 | RNA polymerase factor ATP-dependent RNA helicase, putative                                 | 396  | 549  | 529  | 491  | 539  | 491  | 491  | 507  | 1.02     | 0.862414 | 448      | 371  | 491  | 450  | 450  | 450  | 450  | 450  | 450  | 450  | 0.97 | 0.713821 | 450      | 1.00 | 0.046381 |          |
| 250274_at   | A15g13020 | putative protein predicted protein, Araf. emsy N terminus domain-containing o              | 493  | 664  | 677  | 805  | 925  | 708  | 612  | 813  | 0.75     | 0.080692 | 504      | 524  | 570  | 816  | 660  | 595  | 639  | 601  | 532  | 662  | 0.80 | 0.058541 | 600      | 0.77 | 0.082598 |          |
| 250275_at   | A15g13030 | putative protein mRNA, Moritella maris expressed protein                                   | 107  | 139  | 149  | 206  | 209  | 164  | 132  | 193  | 0.68     | 0.033194 | 65       | 76   | 70   | 99   | 77   | 88   | 90   | 88   | 70   | 88   | 0.80 | 0.015296 | 88       | 0.80 | 0.073318 |          |
| 250276_at   | A15g13040 | putative protein mRNA, Moritella maris expressed protein                                   | 307  | 337  | 375  | 428  | 484  | 384  | 353  | 432  | 0.82     | 0.100398 | 306      | 253  | 312  | 384  | 341  | 285  | 361  | 352  | 291  | 344  | 0.84 | 0.084449 | 337      | 0.86 | 0.253168 |          |
| 250277_at   | A15g13050 | putative protein predicted protein, Araf. emsy N terminus domain-containing o              | 124  | 114  | 122  | 269  | 270  | 130  | 263  | 0.49 | 0.030444 | 130      | 124      | 113  | 79   | 130  | 133  | 115  | 130  | 133  | 115  | 130  | 1.15 | 0.007444 | 139      | 0.83 | 0.156403 |          |
| 250278_at   | A15g12860 | 2-oxoalotaurine/maleate translocator ore oxoalotaurine/maleate translocator, putativ       | 363  | 437  | 453  | 529  | 561  | 436  | 418  | 509  | 0.82     | 0.123522 | 384      | 357  | 399  | 584  | 429  | 371  | 437  | 418  | 380  | 448  | 0.85 | 0.212240 | 461      | 0.82 | 0.276813 |          |
| 250279_at   | A15g13200 | ABA-responsive protein, like ABA-responsive GRM domain-containing protein / ABA            | 44   | 48   | 70   | 95   | 114  | 76   | 54   | 95   | 0.57     | 0.042685 | 90       | 107  | 72   | 107  | 88   | 95   | 145  | 129  | 89   | 113  | 0.79 | 0.192749 | 97       | 0.92 | 0.561215 |          |
| 250280_at   | A15g13230 | putative protein many predicted protein pentatricopeptide (PPR) repeat-containi            | 40   | 55   | 62   | 58   | 70   | 57   | 52   | 62   | 0.84     | 0.280554 | 40       | 31   | 40   | 39   | 39   | 33   | 36   | 37   | 36   | 36   | 1.03 | 0.070965 | 37       | 1.01 | 0.945531 |          |
| 250281_at   | A15g13240 | putative protein predicted protein, Araf. expressed protein                                | 191  | 257  | 332  | 332  | 303  | 268  | 263  | 301  | 0.87     | 0.446901 | 292      | 269  | 357  | 488  | 341  | 356  | 422  | 386  | 340  | 399  | 0.85 | 0.183211 | 365      | 0.86 | 0.351976 |          |
| 250282_at   | A15g13260 | putative protein predicted protein, Araf. expressed protein                                | 253  | 306  | 324  | 422  | 437  | 344  | 297  | 401  | 0.74     | 0.033693 | 305      | 281  | 335  | 468  | 390  | 343  | 372  | 369  | 307  | 390  | 0.79 | 0.033422 | 440      | 0.77 | 0.079482 |          |
| 250283_at   | A15g13270 | putative protein many hypothetical pro pentatricopeptide (PPR) repeat-containi             | 42   | 60   | 57   | 68   | 80   | 57   | 53   | 68   | 0.77     | 0.143181 | 50       | 49   | 49   | 62   | 47   | 52   | 60   | 52   | 49   | 54   | 0.91 | 0.227692 | 53       | 0.92 | 0.427381 |          |
| 250284_at   | A15g13290 | protein kinase precursor - like receptor protein kinase family protein                     | 144  | 224  | 178  | 267  | 293  | 232  | 182  | 264  | 0.69     | 0.047311 | 240      | 207  | 240  | 300  | 334  | 285  | 308  | 289  | 229  | 321  | 0.71 | 0.013987 | 336      | 0.68 | 0.028992 |          |
| 250285_at   | A15g13300 | putative protein GCN4-complementino ARF GTPase-activating domain-containi                  | 229  | 308  | 302  | 321  | 400  | 283  | 280  | 334  | 0.84     | 0.270775 | 189      | 202  | 201  | 259  | 239  | 170  | 229  | 235  | 197  | 225  | 0.88 | 0.210801 | 221      | 0.89 | 0.428096 |          |
| 250286_at   | A15g13320 | auxin-responsive - like protein Nt-qh3 / auxin-responsive GH3 family protein               | 35   | 32   | 37   | 41   | 31   | 30   | 31   | 34   | 0.91     | 0.576013 | 22       | 24   | 37   | 29   | 27   | 28   | 35   | 27   | 28   | 30   | 0.94 | 0.641009 | 28       | 0.97 | 0.608282 |          |
| 250287_at   | A15g13330 | putative protein AP2 domain containi AP2 domain-containing transcription fac               | 39   | 55   | 52   | 59   | 62   | 56   | 49   | 59   | 0.83     | 0.131220 | 72       | 80   | 68   | 84   | 82   | 66   | 98   | 82   | 74   | 83   | 0.89 | 0.260261 | 78       | 0.95 | 0.593178 |          |
| 250288_at   | A15g13350 | auxin-responsive - like protein Nt-qh3 / auxin-responsive GH3 family protein               | 35   | 38   | 56   | 54   | 50   | 52   | 43   | 52   | 0.84     | 0.283551 | 39       | 36   | 53   | 45   | 34   | 38   | 46   | 46   | 43   | 42   | 1.02 | 0.875456 | 39       | 1.09 | 0.604024 |          |
| 250289_at   | A15g13190 | putative protein - supported by full-length expressed protein                              | 867  | 615  | 1075 | 1384 | 1502 | 1283 | 852  | 1390 | 0.61     | 0.021766 | 900      | 921  | 802  | 1198 | 1052 | 991  | 1291 | 1247 | 874  | 1156 | 0.76 | 0.013540 | 1080     | 0.81 | 0.045493 |          |
| 250290_at   | A15g13310 | putative protein - supported by full-length expressed protein                              | 118  | 189  | 169  | 187  | 189  | 169  | 159  | 181  | 0.86     | 0.370254 | 178      | 242  | 179  | 285  | 208  | 193  | 229  | 207  | 200  | 224  | 0.89 | 0.388750 | 229      | 0.87 | 0.400855 |          |
| 250291_at   | A15g13280 | aspartate kinase - supported by full-length aspartate kinase                               | 308  | 397  | 425  | 434  | 485  | 370  | 376  | 430  | 0.88     | 0.332496 | 380      | 332  | 376  | 492  | 428  | 377  | 424  | 404  | 363  | 425  | 0.85 | 0.067706 | 432      | 0.84 | 0.132829 |          |
| 250292_at   | A15g13220 | putative protein predicted proteins, Araf. aspartate protein                               | 80   | 87   | 76   | 139  | 155  | 144  | 81   | 146  | 0.55     | 0.000350 | 64       | 68   | 101  | 249  | 242  | 234  | 297  | 287  | 78   | 262  | 0.30 | 0.000067 | 242      | 0.32 | 0.000187 |          |
| 250293_s_at | A15g13360 | auxin responsive - like protein Nt-qh3 d auxin-responsive GH3 family protein // i          | 15   | 24   | 26   | 15   | 22   | 19   | 16   | 13   | 15       | 0.97     | 0.917984 | 7    | 8    | 8    | 10   | 9    | 10   | 17   | 12   | 8    | 1.2  | 0.67     | 0.113510 | 10   | 0.82     | 0.102827 |
| 250294_at   | A15g13380 | auxin responsive - like protein Nt-qh3 d auxin-responsive GH3 family protein               | 15   | 24   | 26   | 15   | 22   | 19   | 16   | 13   | 15       | 0.97     | 0.917984 | 7    | 8    | 8    | 10   | 9    | 10   | 17   | 12   | 8    | 1.2  | 0.67     | 0.113510 | 10   | 0.82     | 0.102827 |
| 250295_at   | A15g13300 | putative protein                                                                           | 535  | 606  | 661  | 687  | 727  | 587  | 601  | 667  | 0.90     | 0.297562 | 468      | 440  | 534  | 663  | 549  | 455  | 620  | 594  | 483  | 578  | 0.84 | 0.169778 | 556      | 0.87 | 0.331654 |          |
| 250296_at   | A15g13400 | peptide transporter - like protein peptid protein-dependent oligopeptide transport         | 446  | 440  | 464  | 601  | 594  | 570  | 450  | 588  | 0.76     | 0.000326 | 586      | 532  | 578  | 794  | 608  | 476  | 818  | 722  | 565  | 684  | 0.83 | 0.214728 | 626      | 0.90 | 0.550554 |          |
| 250297_at   | A15g13410 | putative protein peptidyl-oxalyl cis-tran: immunohisto / FKBP-vloe peptidyl-oxal           | 188  | 267  | 292  | 306  | 346  | 299  | 249  | 317  | 0.78     | 0.120481 | 226      | 226  | 238  | 354  | 294  | 248  | 303  | 285  | 230  | 297  | 0.78 | 0.027495 | 288      | 0.77 | 0.092456 |          |
| 250298_at   | A15g13470 | putative protein                                                                           | 140  | 140  | 158  | 142  | 157  | 144  | 135  | 148  | 0.91     | 0.465640 | 149      | 152  | 145  | 188  | 146  | 150  | 149  | 149  | 149  | 155  | 0.96 | 0.600003 | 159      | 0.94 | 0.546615 |          |
| 250299_at   | A15g13400 | putative protein weak homolog with c calmodulin-binding family protein                     | 127  | 74   | 74   | 127  | 124  | 108  | 74   | 92   | 0.77     | 0.165803 | 39       | 47   | 47   | 44   | 67   | 65   | 78   | 67   | 61   | 67   | 1.08 | 0.026657 | 94       | 0.53 | 0.026246 |          |
| 250300_at   | A15g13420 | transaldolase - like protein transaldolase: transaldolase, putative                        | 322  | 415  | 356  | 428  | 435  | 363  | 364  | 409  | 0.89     | 0.297126 | 501      | 418  | 470  | 596  | 516  | 423  | 450  | 436  | 463  | 484  | 0.96 | 0.662934 | 512      | 0.90 | 0.427950 |          |
| 250301_s_at | A15g13430 | ubiquinol-cytochrome c reductase - like ubi ubiquinol-cytochrome c reductase iron-d        | 105  | 1066 | 1051 | 1143 | 1326 | 1017 | 977  | 1162 | 0.84     | 0.201408 | 982      | 1184 | 1101 | 1361 | 1190 | 1012 | 1115 | 1086 | 1089 | 1153 | 0.94 | 0.502828 | 1188     | 0.92 | 0.444213 |          |
| 250302_at   | A15g13450 | delta subunit of mitochondrial F1-ATPase ATP synthase delta chain, mitochondrial           | 1203 | 1574 | 1481 | 1751 | 1804 | 1543 | 1413 | 1699 | 0.83     | 0.102226 | 1364     | 1517 | 1523 | 2012 | 1558 | 1481 | 1452 | 1383 | 1488 | 1577 | 0.93 | 0.307322 | 1684     | 0.87 | 0.282960 |          |
| 250303_at   | A15g13450 | putative protein strong similarity to unknown protein                                      | 349  | 425  | 407  | 435  | 532  | 406  | 394  | 458  | 0.86     | 0.227010 | 291      | 191  | 298  | 313  | 322  | 248  | 339  | 322  | 260  | 309  | 0.84 | 0.185284 | 228      | 0.88 | 0.458422 |          |
| 250304_at   | A15g13570 | unknown protein                                                                            | 126  | 195  | 189  | 192  | 214  | 159  | 170  | 188  | 0.90     | 0.543567 | 140      | 154  | 142  | 189  | 152  | 151  | 166  | 147  | 145  | 161  | 0.90 | 0.200460 | 164      | 0.89 | 0.232898 |          |
| 250305_at   | A15g13580 | ABC transporter-like protein                                                               | 45   | 46   | 64   | 54   | 52   | 54   | 52   | 53   | 0.97     | 0.806933 | 33       | 34   | 43   | 40   | 31   | 39   | 39   | 35   | 37   | 37   | 1.00 | 0.961290 | 37       | 0.99 | 0.960878 |          |
| 250306_at   | A15g13590 | unknown protein                                                                            | 71   | 68   | 89   | 103  | 96   | 78   | 76   | 93   | 0.82     | 0.186939 | 39       | 37   | 47   | 48   | 47   | 41   | 51   | 47   | 41   | 47   | 0.88 | 0.173244 | 45       | 0.91 | 0.327995 |          |
| 250307_at   | A15g13600 | putative protein interacting protein, like - like phosphatidylethanolamine NPH3 family pro | 78   | 78   | 78   | 54   | 57   | 53   | 65   | 55   | 1.55     | 0.019287 | 67       | 74   | 77   | 77   | 79   | 84   | 67   | 61   | 73   | 77   | 1.58 | 0.030072 | 74       | 0.98 | 0.020944 |          |
| 250308_at   | A15g13620 | putative protein similar to unknown pro expressed protein                                  | 24   | 28   | 26   | 29   | 26   | 26   | 26   | 26   | 0.96     | 0.500686 | 23       | 25   | 25   | 24   | 20   | 27   | 27   | 23   | 24   | 24   | 0.99 | 0.933357 | 24       | 0.91 | 0.932796 |          |
| 250309_at   | A15g13630 | colabamin biosynthesis protein                                                             | 1251 | 1954 | 1846 | 1881 | 2076 | 1401 | 1684 | 1786 | 0.94     | 0.747788 | 1343     | 1087 | 1253 | 1757 | 1550 | 1290 | 1545 | 1549 | 1228 | 1538 | 0.80 | 0.033200 | 1532     | 0.80 | 0.119656 |          |
| 250310_at   | A15g13680 | putative protein similar to unknown rod IK3 family protein                                 | 214  | 259  | 254  | 268  | 277  | 228  | 242  | 258  | 0.94     | 0.503458 | 198      | 163  | 218  | 238  | 218  | 170  | 223  | 224  | 193  | 215  | 0.90 | 0.306598 | 209      | 0.92 | 0.573448 |          |
| 250311_at   | A15g13690 | alpha-N-acetylglucosaminidase                                                              | 257  | 394  | 378  | 384  | 483  | 326  | 343  | 388  | 0.86     | 0.432208 | 300      | 305  | 289  | 385  | 307  | 284  | 349  | 351  | 298  | 335  | 0.89 | 0.169771 | 325      | 0.92 | 0.424018 |          |
| 250312_at   | A15g13700 | polysaccharide oxidase                                                                     | 48   | 50   | 71   | 71   | 67   | 67   | 58   | 65   | 0.85     | 0.330320 | 40       | 41   | 53   | 45   | 46   | 49   | 47   | 45   | 47   | 48   | 0.97 | 0.862563 | 46       | 0.98 | 0.822634 |          |
| 250313_at   | A15g13720 | unknown protein                                                                            | 54   | 81   | 78   | 96   | 93   | 75   | 71   | 88   | 0.81     | 0.188353 | 87       | 96   | 88   | 132  | 96   | 105  | 111  | 109  | 90   | 111  | 0.82 | 0.052991 | 111      | 0.82 | 0.147772 |          |
| 250314_at   | A15g13740 | transporter-like protein                                                                   | 340  | 500  | 586  | 498  | 462  | 403  | 459  | 455  | 1.01     | 0.958185 | 431      | 439  | 467  | 641  | 522  | 446  | 595  | 579  | 446  | 557  | 0.80 | 0.050183 | 537      | 0.83 | 0.191100 |          |
| 250315_at   | A15g13760 | putative protein similar to unknown rod expressed protein                                  | 127  | 197  | 205  | 192  | 210  | 155  | 177  | 186  | 0.95     | 0.771953 | 125      | 126  | 133  | 144  | 113  | 118  | 152  | 146  | 128  | 141  | 0.91 | 0.175363 | 153      | 0.95 | 0.483247 |          |
| 250316_at   | A15g13610 | putative protein similar to unknown rod expressed protein                                  | 246  | 272  | 311  | 330  | 396  | 284  | 276  | 337  | 0.81     | 0.194711 | 277      | 250  | 239  | 286  | 286  | 286  | 286  | 286  | 302  | 286  | 0.76 | 0.050415 | 308      | 0.72 | 0.067103 |          |
| 250317_at   | A15g13670 | putative protein contains similarity to M. nodulin MN21 family protein                     | 63   |      |      |      |      |      |      |      |          |          |          |      |      |      |      |      |      |      |      |      |      |          |          |      |          |          |

|             |           |                                                                                   |      |      |      |      |      |      |      |      |          |          |          |      |      |      |      |      |      |      |      |      |          |          |           |          |          |          |
|-------------|-----------|-----------------------------------------------------------------------------------|------|------|------|------|------|------|------|------|----------|----------|----------|------|------|------|------|------|------|------|------|------|----------|----------|-----------|----------|----------|----------|
| 250176_at   | A15g14400 | putative protein cytochrome P450 CYF cytochrome P450 family protein               | 33   | 36   | 39   | 39   | 36   | 43   | 37   | 36   | 39       | 0.92     | 0.332149 | 37   | 40   | 36   | 36   | 37   | 37   | 38   | 37   | 38   | 37       | 1.01     | 0.616017  | 37       | 1.01     | 0.665733 |
| 250177_at   | A15g14420 | putative protein copine I, Homo sapien copine-related                             | 124  | 166  | 165  | 160  | 144  | 126  | 151  | 144  | 105      | 0.666473 | 177      | 197  | 193  | 221  | 162  | 148  | 189  | 195  | 189  | 183  | 1.03     | 0.756052 | 177       | 1.07     | 0.634615 |          |
| 250178_at   | A15g14430 | outative protein various unknown or dr dehydration-responsive protein-related     | 597  | 772  | 796  | 885  | 1001 | 698  | 722  | 861  | 0.84     | 0.287546 | 662      | 607  | 753  | 857  | 870  | 675  | 711  | 683  | 674  | 759  | 0.89     | 0.240383 | 800       | 0.84     | 0.171500 |          |
| 250179_at   | A15g14440 | putative protein surface 2, surfactant 2 protein-related / SURF2 c                | 225  | 299  | 271  | 269  | 269  | 238  | 262  | 269  | 0.907055 | 484      | 548      | 429  | 314  | 429  | 360  | 323  | 307  | 306  | 334  | 321  | 0.87     | 0.115428 | 367       | 0.84     | 0.221136 |          |
| 250180_at   | A15g14450 | early node-specific protein - like earh GDSL-motif liase/hydrolase family prot    | 128  | 173  | 113  | 155  | 167  | 147  | 138  | 156  | 0.88     | 0.394346 | 86       | 86   | 80   | 115  | 117  | 86   | 92   | 84   | 84   | 99   | 0.85     | 0.168860 | 806       | 0.79     | 0.089724 |          |
| 250181_at   | A15g14460 | IRNA synthase - like protein IRNA pse pseudouridyate synthase TruB family r       | 143  | 201  | 214  | 197  | 226  | 177  | 186  | 200  | 0.93     | 0.626142 | 152      | 144  | 164  | 230  | 183  | 163  | 185  | 174  | 155  | 187  | 0.83     | 0.084977 | 192       | 0.81     | 0.142102 |          |
| 250182_at   | A15g14470 | putative protein predicted proteins, Arc GMP kinase-related                       | 36   | 38   | 86   | 62   | 63   | 53   | 62   | 0.86 | 0.626777 | 21       | 25       | 35   | 34   | 30   | 28   | 36   | 32   | 27   | 32   | 32   | 0.84     | 0.199172 | 31        | 0.88     | 0.439402 |          |
| 250183_at   | A15g14510 | putative protein various predicted prot alpha-calactin repeat family prot         | 70   | 66   | 61   | 61   | 63   | 65   | 72   | 0.90 | 0.311230 | 51       | 52       | 61   | 51   | 73   | 56   | 62   | 60   | 61   | 51   | 62   | 0.83     | 0.071083 | 67        | 0.83     | 0.048762 |          |
| 250184_at   | A15g14240 | putative protein various predicted prot expressed protein                         | 311  | 436  | 485  | 458  | 484  | 439  | 411  | 460  | 0.89     | 0.402986 | 415      | 530  | 444  | 644  | 469  | 449  | 540  | 519  | 463  | 524  | 0.88     | 0.289054 | 521       | 0.89     | 0.465626 |          |
| 250185_at   | A15g14310 | outative protein esterase HDE, Petrole expressed protein                          | 97   | 119  | 125  | 144  | 171  | 130  | 114  | 148  | 0.77     | 0.076960 | 91       | 92   | 122  | 146  | 120  | 106  | 130  | 126  | 105  | 125  | 0.84     | 0.105477 | 124       | 0.85     | 0.284740 |          |
| 250186_at   | A15g14500 | outative protein ansooov-associated c aldose 1-epimerase family subunit 3         | 150  | 218  | 275  | 269  | 330  | 202  | 214  | 267  | 0.80     | 0.364696 | 192      | 208  | 192  | 350  | 262  | 238  | 257  | 239  | 197  | 269  | 0.73     | 0.042337 | 283       | 0.70     | 0.067652 |          |
| 250187_at   | A15g14370 | outative protein predicted proteins, Arc expressed protein                        | 295  | 495  | 428  | 484  | 541  | 374  | 406  | 468  | 0.87     | 0.16009  | 484      | 548  | 497  | 710  | 586  | 551  | 521  | 526  | 510  | 575  | 0.89     | 0.229985 | 609       | 0.84     | 0.142551 |          |
| 250188_at   | A15g14250 | putative protein COP9 complex subunit COP9 isopomosome complex subunit 3 /        | 630  | 704  | 757  | 849  | 675  | 627  | 761  | 882  | 1.02     | 0.120437 | 573      | 574  | 685  | 889  | 684  | 694  | 685  | 682  | 811  | 714  | 0.86     | 0.134122 | 734       | 0.83     | 0.196309 |          |
| 250189_at   | A15g14410 | putative protein - supported by full-length expressed protein                     | 223  | 315  | 383  | 228  | 251  | 197  | 307  | 225  | 1.36     | 0.170085 | 260      | 360  | 314  | 364  | 272  | 275  | 308  | 305  | 311  | 305  | 1.02     | 0.832648 | 303       | 1.03     | 0.860323 |          |
| 250190_at   | A15g14320 | ribosomal protein precursor - like ribos 30s ribosomal protein S13, chloroplast ( | 550  | 919  | 796  | 808  | 861  | 716  | 755  | 795  | 0.95     | 0.749100 | 700      | 899  | 816  | 1068 | 825  | 801  | 850  | 838  | 805  | 877  | 0.92     | 0.390882 | 808       | 0.90     | 0.418596 |          |
| 250191_at   | A15g14270 | kinase - like protein RING3 protein M1 protein-binding bromodomain-containing o   | 420  | 577  | 615  | 535  | 689  | 498  | 537  | 574  | 0.94     | 0.679172 | 397      | 293  | 389  | 402  | 370  | 353  | 430  | 396  | 359  | 390  | 0.92     | 0.349894 | 273       | 0.96     | 0.694141 |          |
| 250192_at   | A15g14520 | o deacetyl - like protein embryonic dev pseudocidin-related                       | 730  | 871  | 887  | 883  | 1053 | 755  | 829  | 897  | 0.92     | 0.532791 | 788      | 654  | 752  | 904  | 919  | 809  | 931  | 903  | 732  | 893  | 0.82     | 0.007620 | 877       | 0.83     | 0.050503 |          |
| 250193_at   | A15g14540 | outative protein oroline-rich protein Hc1 protine-rich family protein             | 205  | 228  | 316  | 294  | 391  | 231  | 250  | 306  | 0.82     | 0.386811 | 268      | 204  | 221  | 321  | 312  | 235  | 292  | 244  | 231  | 281  | 0.82     | 0.117204 | 289       | 0.80     | 0.153614 |          |
| 250194_at   | A15g14550 | putative protein various predicted prot expressed protein                         | 141  | 183  | 198  | 205  | 234  | 199  | 174  | 213  | 0.82     | 0.124637 | 149      | 165  | 163  | 230  | 179  | 174  | 195  | 187  | 159  | 193  | 0.82     | 0.045262 | 194       | 0.82     | 0.125552 |          |
| 250195_at   | A15g14560 | putative protein expressed protein                                                | 6    | 6    | 9    | 8    | 12   | 9    | 7    | 10   | 0.74     | 0.177356 | 4        | 4    | 6    | 6    | 5    | 5    | 8    | 4    | 6    | 7    | 0.73     | 0.100692 | 6         | 0.77     | 0.210496 |          |
| 250196_at   | A15g14580 | polynucleotide phosphorase polynucleotide nucleicdityltransferase                 | 66   | 75   | 79   | 103  | 107  | 93   | 73   | 101  | 0.73     | 0.007416 | 53       | 46   | 71   | 58   | 52   | 51   | 57   | 56   | 57   | 55   | 1.04     | 0.724459 | 53        | 1.06     | 0.684461 |          |
| 250197_at   | A15g14590 | isocitrate dehydrogenase - like protein isocitrate dehydrogenase, putative / NAf  | 343  | 461  | 460  | 594  | 632  | 531  | 421  | 586  | 0.72     | 0.028233 | 387      | 375  | 396  | 586  | 445  | 410  | 451  | 427  | 386  | 464  | 0.83     | 0.112662 | 480       | 0.80     | 0.155908 |          |
| 250198_at   | A15g14610 | DRH1 DEAD box protein - like DRH1 / DEAD box RNA helicase, putative               | 823  | 1096 | 1218 | 1354 | 1580 | 1337 | 1045 | 1424 | 0.73     | 0.054592 | 592      | 489  | 714  | 878  | 685  | 608  | 713  | 712  | 599  | 719  | 0.83     | 0.161117 | 724       | 0.83     | 0.291719 |          |
| 250199_at   | A15g14620 | outative protein de novo DNA methyl: cytosine methyltransferase (DRM2)            | 219  | 317  | 395  | 314  | 346  | 284  | 310  | 315  | 0.99     | 0.940317 | 204      | 204  | 241  | 285  | 236  | 226  | 278  | 275  | 216  | 260  | 0.83     | 0.054922 | 249       | 0.87     | 0.210071 |          |
| 250200_at   | A15g14630 | putative protein cytosine methyltransferase (DRM2)                                | 48   | 61   | 57   | 73   | 71   | 57   | 56   | 67   | 0.82     | 0.126448 | 34       | 30   | 29   | 33   | 27   | 31   | 33   | 31   | 30   | 31   | 0.86     | 0.436189 | 30        | 0.98     | 0.774222 |          |
| 250201_at   | A15g14640 | protein kinase MSK-3 - like protein kin protein kinase family protein             | 665  | 744  | 684  | 1071 | 1072 | 846  | 763  | 996  | 0.77     | 0.077586 | 794      | 673  | 824  | 1465 | 1104 | 1063 | 1047 | 1064 | 764  | 1149 | 0.67     | 0.013535 | 1211      | 0.63     | 0.030133 |          |
| 250202_at   | A15g14650 | polyacetaluronase - like protein polyva polyacetaluronase, putative / pectinase,  | 17   | 18   | 20   | 22   | 19   | 20   | 19   | 20   | 0.91     | 0.180928 | 13       | 15   | 16   | 20   | 16   | 20   | 14   | 15   | 17   | 16   | 0.86     | 0.198432 | 17        | 0.85     | 0.201138 |          |
| 250203_at   | A15g14670 | ADP-ribosylation factor - like protein Ai ADP-ribosylation factor, putative       | 39   | 39   | 46   | 51   | 47   | 43   | 41   | 47   | 0.87     | 0.143271 | 24       | 29   | 32   | 27   | 29   | 26   | 28   | 34   | 31   | 28   | 0.30     | 0.096    | 0.609318  | 28       | 1.02     | 0.813443 |
| 250204_at   | A15g14680 | outative protein various predicted prot universal stress protein (USP) family cr  | 253  | 341  | 403  | 342  | 426  | 519  | 332  | 362  | 0.92     | 0.607875 | 333      | 328  | 312  | 479  | 357  | 365  | 422  | 394  | 324  | 411  | 0.79     | 0.014984 | 414       | 0.78     | 0.058804 |          |
| 250205_at   | A15g14690 | outative protein predicted protein Arab: outative protein predicted protein Arab: | 40   | 52   | 52   | 69   | 63   | 53   | 48   | 52   | 0.82     | 0.090437 | 37       | 42   | 54   | 42   | 61   | 60   | 68   | 58   | 54   | 72   | 0.64     | 0.069898 | 54        | 0.68     | 0.026218 |          |
| 250206_at   | A15g14660 | putative protein polypeptide deformylase: peptide deformylase, chloroplast / poly | 84   | 112  | 103  | 126  | 127  | 107  | 99   | 102  | 0.83     | 0.118788 | 97       | 105  | 107  | 151  | 119  | 117  | 123  | 112  | 108  | 103  | 122      | 0.85     | 0.126997  | 129      | 0.79     | 0.079627 |
| 250207_at   | A15g14600 | outative protein predicted proteins, Drc expressed protein                        | 133  | 146  | 154  | 192  | 198  | 164  | 144  | 185  | 0.78     | 0.029646 | 167      | 154  | 181  | 246  | 202  | 183  | 222  | 192  | 168  | 209  | 0.80     | 0.043365 | 210       | 0.80     | 0.103580 |          |
| 250208_at   | A15g14530 | putative protein various predicted prot transducin family protein / WD-40 repeat  | 241  | 317  | 337  | 312  | 327  | 281  | 298  | 307  | 0.97     | 0.801955 | 274      | 327  | 322  | 474  | 340  | 331  | 356  | 331  | 368  | 366  | 0.84     | 0.176839 | 362       | 0.81     | 0.207645 |          |
| 250209_at   | A15g14700 | cinnamoyl CoA reductase - like protein cinnamoyl-CoA reductase-related            | 61   | 72   | 83   | 131  | 158  | 125  | 130  | 139  | 0.51     | 0.004038 | 113      | 140  | 139  | 207  | 169  | 145  | 151  | 145  | 131  | 162  | 0.81     | 0.119237 | 171       | 0.77     | 0.125359 |          |
| 250210_at   | A15g14710 | outative protein -supported by full-lenot expressed protein                       | 196  | 245  | 262  | 253  | 284  | 222  | 235  | 253  | 0.93     | 0.531052 | 247      | 248  | 275  | 321  | 307  | 288  | 283  | 258  | 257  | 292  | 0.88     | 0.071005 | 306       | 0.84     | 0.021199 |          |
| 250211_at   | A15g14570 | high affinity nitrate transporter - like or transporer, putative                  | 88   | 100  | 123  | 143  | 121  | 106  | 104  | 124  | 0.84     | 0.256473 | 80       | 77   | 83   | 91   | 85   | 81   | 106  | 96   | 80   | 92   | 0.87     | 0.087842 | 86        | 0.93     | 0.158817 |          |
| 250212_at   | A15g15120 | putative protein predicted proteins, Arc expressed protein                        | 187  | 223  | 156  | 251  | 226  | 218  | 189  | 232  | 0.82     | 0.123369 | 169      | 175  | 232  | 276  | 236  | 193  | 154  | 138  | 192  | 200  | 0.86     | 0.838994 | 235       | 0.82     | 0.236796 |          |
| 250213_at   | A15g15130 | putative protein TMV response-related WRKY family transcription factor            | 24   | 31   | 33   | 30   | 34   | 33   | 28   | 32   | 0.81     | 0.26     | 25       | 26   | 28   | 25   | 26   | 24   | 25   | 21   | 27   | 25   | 1.07     | 0.255156 | 26        | 1.01     | 0.029331 |          |
| 250214_at   | A15g15140 | putative aldose 1-epimerase - like prot aldose 1-epimerase family protein         | 48   | 43   | 47   | 45   | 48   | 35   | 46   | 43   | 1.08     | 0.477543 | 31       | 39   | 43   | 35   | 31   | 32   | 40   | 35   | 38   | 34   | 1.09     | 0.391403 | 32        | 1.16     | 0.242400 |          |
| 250215_at   | A15g15160 | outative protein predicted proteins, Arc bHLH family protein                      | 22   | 29   | 30   | 26   | 29   | 26   | 27   | 1.01 | 0.953271 | 39       | 34       | 34   | 48   | 40   | 35   | 34   | 42   | 36   | 40   | 0.90 | 0.305358 | 41       | 0.87      | 0.274094 |          |          |
| 250216_at   | A15g15170 | outative protein predicted proteins, How tyrosyl-DNA phosphodiesterase-related    | 165  | 196  | 224  | 220  | 256  | 185  | 195  | 220  | 0.89     | 0.405079 | 155      | 159  | 176  | 218  | 175  | 170  | 211  | 200  | 163  | 195  | 0.84     | 0.081767 | 188       | 0.87     | 0.218811 |          |
| 250217_at   | A15g15180 | ox10 peroxidase - like protein ox10 c peroxidase, putative                        | 12   | 10   | 14   | 10   | 14   | 12   | 12   | 12   | 1.02     | 0.915285 | 38       | 19   | 17   | 10   | 14   | 10   | 9    | 85   | 127  | 1989 | 10       | 0.95     | 0.1271989 | 10       | 0.97     | 0.896409 |
| 250218_at   | A15g15190 | putative protein expressed protein                                                | 28   | 37   | 42   | 44   | 45   | 45   | 40   | 40   | 0.92     | 0.312482 | 30       | 33   | 42   | 47   | 40   | 40   | 48   | 40   | 39   | 48   | 0.80     | 0.058572 | 42        | 0.83     | 0.179460 |          |
| 250219_at   | A15g15200 | 40S ribosomal protein - like 40S ribos: 40S ribosomal protein S9 (RPS9B)          | 4733 | 5364 | 5632 | 5721 | 6274 | 5321 | 5243 | 5772 | 0.91     | 0.240017 | 5130     | 5137 | 5437 | 6184 | 5728 | 5148 | 5689 | 5807 | 5235 | 5711 | 0.92     | 0.087307 | 5686      | 0.92     | 0.226673 |          |
| 250220_at   | A15g15210 | putative protein various predicted prot zinc finger homeobox family protein / ZF  | 29   | 281  | 206  | 494  | 571  | 456  | 219  | 507  | 0.43     | 0.003577 | 264      | 282  | 297  | 634  | 446  | 487  | 482  | 483  | 274  | 486  | 0.56     | 0.008359 | 489       | 0.56     | 0.046091 |          |
| 250221_at   | A15g15240 | outative protein amino acid transport o amino acid transporter family protein     | 169  | 34   | 38   | 42   | 43   | 35   | 33   | 40   | 0.83     | 0.134398 | 22       | 22   | 28   | 30   | 26   | 29   | 29   | 28   | 24   | 29   | 0.83     | 0.068626 | 29        | 0.84     | 0.129499 |          |
| 250222_at   | A15g15250 | F1stH protease, outative similar to F1stH protease, putative                      | 15   | 18   | 15   | 21   | 18   | 12   | 12   | 0.83 | 0.094143 | 22       | 16       | 13   | 17   | 17   | 12   | 11   | 10   | 9    | 10   | 15   | 1.00     | 0.997798 | 15        | 1.06     | 0.413557 |          |
| 250223_at</ |           |                                                                                   |      |      |      |      |      |      |      |      |          |          |          |      |      |      |      |      |      |      |      |      |          |          |           |          |          |          |

|             |           |                                            |                                                |      |      |      |      |      |      |          |      |      |          |      |      |      |      |      |      |      |      |          |      |          |          |      |          |          |
|-------------|-----------|--------------------------------------------|------------------------------------------------|------|------|------|------|------|------|----------|------|------|----------|------|------|------|------|------|------|------|------|----------|------|----------|----------|------|----------|----------|
| 250082_at   | A15g17220 | polygalacturonase-like protein             | glycosyl hydrolase family 28 protein / p       | 58   | 69   | 86   | 20   | 17   | 15   | 71       | 17   | 4.16 | 0.002910 | 22   | 18   | 19   | 12   | 13   | 11   | 9    | 9    | 20       | 11   | 1.81     | 0.000578 | 12   | 1.64     | 0.003864 |
| 250083_at   | A15g17200 | glutathione S-transferase-like protein     | : glutathione S-transferase, putative          | 52   | 85   | 159  | 102  | 88   | 89   | 99       | 93   | 1.06 | 0.870900 | 515  | 519  | 577  | 296  | 221  | 217  | 228  | 215  | 537      | 235  | 2.28     | 0.000020 | 245  | 2.19     | 0.000853 |
| 250084_at   | A15g17240 | unknown protein                            | SET domain-containing protein                  | 57   | 76   | 73   | 93   | 102  | 87   | 69       | 94   | 0.73 | 0.025042 | 67   | 64   | 68   | 99   | 84   | 81   | 78   | 77   | 66       | 84   | 0.77     | 0.018856 | 88   | 0.75     | 0.019943 |
| 250085_at   | A15g17260 | unknown protein                            | chondroitin-6-sulfatase class O (PIG-)         | 75   | 89   | 99   | 93   | 118  | 90   | 103      | 87   | 0.86 | 0.142190 | 67   | 66   | 84   | 72   | 64   | 72   | 64   | 70   | 72       | 64   | 0.94     | 0.561400 | 79   | 0.97     | 0.000007 |
| 250086_at   | A15g17260 | NAM (no apical meristem)-like protein      | no apical meristem (NAM) family protein        | 19   | 20   | 24   | 30   | 30   | 21   | 21       | 27   | 0.78 | 0.142190 | 16   | 18   | 18   | 29   | 26   | 23   | 25   | 26   | 17       | 26   | 0.67     | 0.000652 | 26   | 0.67     | 0.000773 |
| 250087_at   | A15g17270 | putative protein contains similarity to tr | tetratricopeptide repeat (TPR)-containing      | 76   | 118  | 121  | 141  | 153  | 111  | 105      | 135  | 0.78 | 0.198742 | 91   | 75   | 94   | 105  | 110  | 86   | 117  | 111  | 87       | 106  | 0.82     | 0.065482 | 100  | 0.87     | 0.023272 |
| 250088_at   | A15g17290 | APG5 (autophagy 5)-like protein            | autophagy protein Atpg5 family protein         | 150  | 238  | 238  | 190  | 215  | 160  | 209      | 188  | 1.11 | 0.570386 | 185  | 215  | 204  | 257  | 192  | 190  | 194  | 176  | 201      | 202  | 1.00     | 0.993503 | 213  | 0.95     | 0.661009 |
| 250089_at   | A15g17300 | unknown protein                            | homologous to leucine zipper family protein    | 82   | 82   | 82   | 107  | 103  | 65   | 101      | 105  | 0.87 | 0.085919 | 53   | 67   | 60   | 75   | 63   | 62   | 63   | 62   | 63       | 62   | 0.86     | 0.244972 | 64   | 0.84     | 0.000654 |
| 250090_at   | A15g17330 | glutamate decarboxylase 1 (GAD 1) (6c      | glutamate decarboxylase 1 (GAD 1)              | 147  | 182  | 257  | 20   | 20   | 24   | 195      | 21   | 9.17 | 0.005864 | 207  | 219  | 239  | 23   | 22   | 26   | 22   | 32   | 222      | 25   | 8.95     | 0.000000 | 23   | 9.46     | 0.000030 |
| 250091_at   | A15g17340 | unknown protein                            | expressed protein                              | 21   | 154  | 28   | 29   | 22   | 27   | 68       | 26   | 2.61 | 0.380917 | 19   | 19   | 21   | 24   | 23   | 17   | 30   | 23   | 20       | 23   | 0.84     | 0.280220 | 21   | 0.91     | 0.436542 |
| 250092_at   | A15g17360 | putative protein                           | WD-40 repeat family protein                    | 110  | 136  | 28   | 27   | 23   | 30   | 129      | 127  | 0.80 | 0.261270 | 22   | 20   | 23   | 35   | 24   | 15   | 31   | 37   | 21       | 28   | 0.76     | 0.249194 | 25   | 0.87     | 0.617126 |
| 250093_at   | A15g17370 | hyphal protein                             | WD-40 repeat family protein                    | 110  | 136  | 28   | 27   | 23   | 30   | 129      | 127  | 0.80 | 0.261270 | 22   | 20   | 23   | 35   | 24   | 15   | 31   | 37   | 21       | 28   | 0.76     | 0.249194 | 25   | 0.87     | 0.617126 |
| 250094_at   | A15g17380 | 2-hydroxybiflavoyl-CoA lyase-like prot     | pyruvate decarboxylase family protein          | 418  | 490  | 530  | 570  | 613  | 491  | 479      | 558  | 0.86 | 0.178703 | 364  | 332  | 389  | 463  | 391  | 370  | 382  | 407  | 382      | 407  | 0.88     | 0.175742 | 414  | 0.87     | 0.242069 |
| 250095_at   | A15g17230 | phytoene synthase (qbiAAB65697.1) :        | phytoene synthase (PSY) / qeranyloerap         | 243  | 424  | 401  | 485  | 480  | 352  | 356      | 439  | 0.81 | 0.309827 | 334  | 320  | 375  | 607  | 444  | 437  | 439  | 416  | 343      | 469  | 0.73     | 0.040206 | 496  | 0.69     | 0.057840 |
| 250096_at   | A15g17190 | putative protein similar to unknown prot   | expressed protein                              | 611  | 711  | 785  | 910  | 977  | 823  | 702      | 903  | 0.78 | 0.040549 | 723  | 754  | 726  | 1015 | 737  | 758  | 802  | 785  | 734      | 819  | 0.90     | 0.254543 | 837  | 0.88     | 0.319651 |
| 250097_at   | A15g17280 | putative protein similar to unknown drc    | expressed protein                              | 111  | 148  | 130  | 135  | 155  | 132  | 130      | 141  | 0.92 | 0.442417 | 167  | 167  | 156  | 227  | 167  | 175  | 193  | 173  | 163      | 187  | 0.87     | 0.157898 | 190  | 0.86     | 0.239300 |
| 250098_at   | A15g17350 | putative protein - supported by full-lenc  | expressed protein                              | 51   | 43   | 57   | 55   | 58   | 52   | 50       | 55   | 0.92 | 0.355978 | 28   | 38   | 34   | 35   | 29   | 26   | 34   | 33   | 33       | 31   | 1.03     | 0.772148 | 30   | 1.08     | 0.633877 |
| 250099_at   | A15g17300 | unknown protein : supported by cDNA: m     | myb family transcription factor                | 67   | 174  | 228  | 74   | 76   | 51   | 156      | 67   | 2.32 | 0.136470 | 37   | 37   | 49   | 69   | 51   | 37   | 43   | 42   | 41       | 48   | 0.85     | 0.393858 | 52   | 0.78     | 0.323095 |
| 250072_at   | A15g17210 | putative protein similar to unknown prot   | expressed protein                              | 398  | 499  | 485  | 506  | 550  | 467  | 447      | 508  | 0.88 | 0.163007 | 409  | 425  | 436  | 627  | 502  | 477  | 469  | 422  | 423      | 500  | 0.85     | 0.151870 | 536  | 0.79     | 0.076377 |
| 250073_at   | A15g17170 | unknown protein : supported by cDNA: n     | rubredoxin family protein                      | 205  | 361  | 271  | 332  | 334  | 265  | 279      | 310  | 0.90 | 0.583534 | 356  | 358  | 380  | 496  | 370  | 370  | 397  | 403  | 364      | 407  | 0.89     | 0.220415 | 412  | 0.88     | 0.324421 |
| 250074_at   | A15g17310 | UDP-glucose pyrophosphorylase : sup        | UTP--glucose-1-phosphate uridylyltransf        | 156  | 197  | 190  | 286  | 266  | 222  | 181      | 259  | 0.70 | 0.028466 | 195  | 176  | 200  | 316  | 261  | 213  | 244  | 236  | 190      | 254  | 0.75     | 0.036581 | 263  | 0.72     | 0.076492 |
| 250075_at   | A15g17670 | putative protein                           | expressed protein                              | 195  | 242  | 239  | 222  | 239  | 199  | 212      | 220  | 0.96 | 0.810196 | 170  | 199  | 213  | 295  | 214  | 207  | 243  | 242  | 194      | 240  | 0.81     | 0.088599 | 238  | 0.81     | 0.225079 |
| 250044_at   | A15g17680 | disease resistance protein RPP1-WaB        | disease resistance protein (TIR-NBS-LR         | 69   | 106  | 106  | 106  | 120  | 103  | 92       | 109  | 0.84 | 0.238319 | 76   | 76   | 88   | 82   | 72   | 81   | 88   | 80   | 81       | 0.99 | 0.908940 | 78       | 1.02 | 0.732992 |          |
| 250045_at   | A15g17700 | outative protein mRNA (orf4A). Arabid      | MATE efflux family protein                     | 31   | 31   | 34   | 37   | 41   | 35   | 32       | 38   | 0.86 | 0.074640 | 30   | 24   | 32   | 25   | 30   | 25   | 30   | 29   | 29       | 28   | 1.04     | 0.684838 | 26   | 1.09     | 0.420297 |
| 250046_at   | A15g17720 | putative protein predicted proteins. Arc   | hydrolase, alpha/beta fold family protein      | 75   | 85   | 114  | 120  | 115  | 100  | 91       | 112  | 0.82 | 0.196420 | 53   | 50   | 74   | 61   | 48   | 47   | 55   | 65   | 59       | 55   | 1.06     | 0.649947 | 52   | 1.13     | 0.486246 |
| 250047_at   | A15g17730 | BCS1 - like protein h-bcs1.1. Homo sapi    | AAA-type ATPase family protein                 | 29   | 32   | 34   | 38   | 46   | 44   | 32       | 43   | 0.74 | 0.017762 | 24   | 24   | 26   | 44   | 27   | 24   | 34   | 0.73 | 0.101274 | 32   | 0.77     | 0.295686 |      |          |          |
| 250048_s_at | A15g17750 | BCS1 - like protein h-bcs1.1. Homo sapi    | AAA-type ATPase family protein /// AAA         | 9    | 12   | 13   | 14   | 15   | 14   | 11       | 14   | 0.81 | 0.091756 | 6    | 8    | 8    | 7    | 6    | 9    | 8    | 7    | 8        | 0.95 | 0.644988 | 8        | 0.96 | 0.782331 |          |
| 250049_at   | A15g17780 | putative protein predicted proteins. Arc   | hydrolase, alpha/beta fold family protein      | 32   | 44   | 58   | 61   | 60   | 55   | 45       | 58   | 0.76 | 0.148757 | 38   | 47   | 48   | 39   | 37   | 38   | 40   | 42   | 44       | 39   | 1.13     | 0.097959 | 38   | 1.17     | 0.127898 |
| 250050_at   | A15g17790 | putative protein predicted proteins. Arc   | zinc finger (Ran-binding) family protein       | 39   | 49   | 43   | 48   | 54   | 46   | 44       | 49   | 0.88 | 0.195435 | 34   | 41   | 39   | 45   | 37   | 38   | 39   | 59   | 57       | 57   | 0.97     | 0.751252 | 38   | 1.00     | 0.984711 |
| 250051_at   | A15g17800 | MYB58 R2R3-MYB factor family memb          | myb factor family protein (MY556)              | 65   | 84   | 69   | 63   | 63   | 65   | 84       | 69   | 0.86 | 0.071238 | 71   | 73   | 91   | 108  | 106  | 108  | 102  | 104  | 108      | 108  | 0.72     | 0.015272 | 112  | 0.68     | 0.019655 |
| 250052_at   | A15g17830 | putative protein predicted proteins. Arc   | zinc finger (Ran-binding) family protein       | 17   | 11   | 15   | 13   | 13   | 11   | 14       | 12   | 1.16 | 0.313066 | 10   | 5    | 12   | 10   | 9    | 8    | 14   | 9    | 9        | 10   | 0.90     | 0.665153 | 9    | 1.01     | 0.975902 |
| 250053_at   | A15g17850 | potassium-dependent sodium-calcium         | cation exchanger, putative (CAX8)              | 174  | 183  | 287  | 326  | 300  | 283  | 214      | 303  | 0.71 | 0.083752 | 96   | 95   | 114  | 117  | 92   | 88   | 128  | 123  | 101      | 109  | 0.93     | 0.520567 | 99   | 1.03     | 0.826619 |
| 250054_at   | A15g17860 | potassium-dependent sodium-calcium         | cation exchanger, putative (CAX7)              | 148  | 64   | 83   | 69   | 62   | 68   | 62       | 66   | 0.93 | 0.676378 | 59   | 58   | 72   | 75   | 63   | 59   | 83   | 77   | 63       | 71   | 0.88     | 0.250641 | 66   | 0.96     | 0.698770 |
| 250055_at   | A15g17770 | NADH-cytochrome b5 reductase - su          | NADH-cytochrome b5 reductase                   | 1261 | 1409 | 1381 | 1741 | 1810 | 1473 | 1350     | 1675 | 0.81 | 0.044747 | 1343 | 1313 | 1442 | 2123 | 1670 | 1515 | 1431 | 1402 | 1367     | 1632 | 0.84     | 0.183682 | 1769 | 0.77     | 0.096736 |
| 250056_at   | A15g17660 | putative protein predicted proteins. Sw    | expressed protein                              | 133  | 170  | 171  | 174  | 170  | 166  | 158      | 183  | 0.86 | 0.242006 | 135  | 152  | 161  | 230  | 174  | 165  | 166  | 150  | 149      | 177  | 0.84     | 0.203259 | 190  | 0.79     | 0.138188 |
| 250057_at   | A15g17840 | outative protein : supported by full-lenc  | chaperone protein dnaJ-related                 | 305  | 438  | 407  | 519  | 528  | 454  | 383      | 501  | 0.77 | 0.064825 | 417  | 425  | 505  | 735  | 574  | 518  | 503  | 509  | 449      | 568  | 0.79     | 0.102339 | 609  | 0.74     | 0.086798 |
| 250058_at   | A15g17690 | plastid-specific ribosomal protein 6       | plastid-specific ribosomal protein-relatec     | 391  | 647  | 494  | 547  | 590  | 516  | 510      | 551  | 0.93 | 0.630027 | 692  | 793  | 761  | 1040 | 737  | 748  | 821  | 814  | 749      | 832  | 0.90     | 0.316271 | 842  | 0.89     | 0.420994 |
| 250059_at   | A15g17820 | peroxidase ATP1a3 - supported by full      | peroxidase 57 (PER57) (P57) (PROR10            | 21   | 32   | 41   | 36   | 39   | 35   | 21       | 37   | 0.86 | 0.143363 | 23   | 20   | 26   | 23   | 22   | 24   | 24   | 24   | 24       | 24   | 1.01     | 0.325122 | 24   | 1.00     | 0.076955 |
| 250060_at   | A15g17870 | chromo domain protein polycmb-like         | like heterochromatin protein (LHP1)            | 207  | 272  | 279  | 319  | 344  | 266  | 253      | 310  | 0.82 | 0.156779 | 214  | 244  | 205  | 352  | 249  | 237  | 290  | 270  | 221      | 280  | 0.79     | 0.083647 | 280  | 0.79     | 0.201715 |
| 250061_at   | A15g17710 | chloroalast GrE protein : supported b      | co-chaperone grpE family protein               | 155  | 214  | 258  | 209  | 221  | 186  | 209      | 205  | 1.02 | 0.908933 | 165  | 219  | 198  | 281  | 172  | 169  | 211  | 224  | 194      | 211  | 0.92     | 0.586599 | 207  | 0.94     | 0.757597 |
| 250062_at   | A15g17760 | BCS1 - like protein h-bcs1.1. Homo sapi    | AAA-type ATPase family protein                 | 703  | 764  | 1001 | 1082 | 1226 | 1013 | 823      | 1107 | 0.74 | 0.061828 | 776  | 945  | 758  | 1235 | 968  | 934  | 903  | 868  | 826      | 982  | 0.84     | 0.162199 | 1046 | 0.79     | 0.122053 |
| 250063_at   | A15g17780 | disease resistance protein - like          | disease disease resistance protein (TIR-NBS-LR | 31   | 31   | 54   | 38   | 57   | 46   | 39       | 47   | 0.82 | 0.420493 | 41   | 41   | 36   | 32   | 31   | 36   | 58   | 35   | 39       | 43   | 0.93     | 0.707791 | 33   | 1.19     | 0.043435 |
| 250064_at   | A15g17800 | disease resistance protein - like down     | LM domain-containing protein / disease         | 19   | 20   | 22   | 22   | 25   | 0.89 | 0.622718 | 21   | 18   | 22       | 19   | 18   | 22   | 19   | 18   | 17   | 12   | 19   | 12       | 1.13 | 0.229134 | 17       | 1.20 | 0.112005 |          |
| 250065_at   | A15g17910 | putative protein predicted proteins. Arc   | expressed protein                              | 32   | 37   | 39   | 48   | 52   | 44   | 36       | 48   | 0.76 | 0.019708 | 24   | 24   | 31   | 31   | 25   | 36   | 29   | 27   | 31       | 0.87 | 0.222575 | 29       | 0.91 | 0.425006 |          |
| 250066_at   | A15g17930 | unknown protein                            | MA3 domain-containing protein                  | 174  | 221  | 239  | 238  | 270  | 217  | 211      | 242  | 0.87 | 0.286924 | 197  | 184  | 207  | 257  | 213  | 169  | 243  | 241  | 196      | 224  | 0.87     | 0.227141 | 213  | 0.92     | 0.549392 |
| 250067_at   | A15g17950 | unknown protein                            | hyphal protein                                 | 26   | 25   | 33   | 34   | 27   | 38   | 28       | 33   | 0.86 | 0.316018 | 18   | 19   | 27   | 17   | 13   | 20   | 23   | 21   | 19       | 1.13 | 0.453405 | 17       | 1.29 | 0.219293 |          |
| 250068_at   | A15g17960 | CHP-rich zinc finger protein-like          | CHP-rich zinc finger protein                   | 28   | 38   | 38   | 38   | 37   | 38   | 28       | 37   | 1.00 | 0.093836 | 23   | 31   | 28   | 26   | 20   | 23   | 26   | 25   | 23       | 26   | 1.06     | 0.651084 | 26   | 1        |          |

|             |           |                                                                                      |      |      |      |      |      |      |      |      |          |          |      |     |      |      |      |      |      |      |      |      |          |          |      |          |          |
|-------------|-----------|--------------------------------------------------------------------------------------|------|------|------|------|------|------|------|------|----------|----------|------|-----|------|------|------|------|------|------|------|------|----------|----------|------|----------|----------|
| 249994_at   | A15g18590 | putative protein cell polarity protein tea kelch repeat-containing protein           | 336  | 456  | 379  | 456  | 585  | 391  | 390  | 478  | 0.82     | 0.262325 | 343  | 302 | 380  | 477  | 448  | 384  | 486  | 456  | 342  | 450  | 0.76     | 0.009907 | 436  | 0.78     | 0.057344 |
| 249995_at   | A15g18610 | protein kinase -like protein protein kina protein family protein                     | 43   | 53   | 58   | 55   | 67   | 55   | 51   | 59   | 0.86     | 0.250828 | 21   | 20  | 23   | 21   | 25   | 22   | 23   | 24   | 21   | 23   | 0.93     | 0.223490 | 23   | 0.94     | 0.436632 |
| 249996_at   | A15g18600 | oligoadenine -like protein oligoadenine, oligoadenine family protein                 | 68   | 106  | 151  | 85   | 113  | 81   | 108  | 93   | 1.16     | 0.596723 | 98   | 128 | 73   | 95   | 85   | 97   | 152  | 140  | 114  | 114  | 0.88     | 0.533795 | 92   | 1.08     | 0.678782 |
| 249997_at   | A15g18610 | chromatin remodeling complex ATPase DNA-dependent protein kinase                     | 468  | 562  | 573  | 615  | 573  | 573  | 573  | 573  | 0.94     | 0.556267 | 34   | 265 | 370  | 406  | 397  | 396  | 406  | 370  | 362  | 384  | 0.90     | 0.533423 | 362  | 0.94     | 0.653338 |
| 249998_at   | A15g18550 | outvative protein unnamed ORF: Mus r; tonneau 2 (TON2)                               | 988  | 1243 | 1238 | 1404 | 1642 | 1180 | 1156 | 1408 | 0.88     | 0.184789 | 1176 | 942 | 1121 | 1412 | 1464 | 1199 | 1321 | 1284 | 1080 | 1336 | 0.81     | 0.019416 | 1358 | 0.79     | 0.060628 |
| 249999_at   | A15g18640 | triacylglycerol lipase-like protein triacyl lipase class 3 family protein            | 86   | 150  | 135  | 112  | 134  | 85   | 124  | 110  | 1.12     | 0.607206 | 89   | 97  | 94   | 111  | 87   | 94   | 112  | 104  | 93   | 101  | 0.92     | 0.250178 | 97   | 0.96     | 0.598064 |
| 250000_at   | A15g18650 | putative protein PGPD14 - Petunia x h zinc finger (C3HC4-type RING finger) fa        | 303  | 495  | 477  | 349  | 385  | 256  | 425  | 330  | 1.29     | 0.258757 | 239  | 277 | 254  | 321  | 215  | 228  | 244  | 227  | 247  | 247  | 1.04     | 0.728812 | 255  | 1.01     | 0.958456 |
| 250001_at   | A15g18650 | putative protein lubby protein lubby protein / lubby family protein                  | 196  | 279  | 291  | 273  | 245  | 268  | 279  | 281  | 0.89     | 0.406663 | 261  | 316 | 291  | 419  | 384  | 348  | 409  | 382  | 374  | 374  | 0.93     | 0.003723 | 377  | 0.95     | 0.604596 |
| 250002_at   | A15g18690 | oroline-rich protein predicted protein I hydroxylase-rich glycovanilin family c      | 59   | 65   | 68   | 117  | 126  | 97   | 74   | 113  | 0.85     | 0.045643 | 167  | 200 | 161  | 297  | 226  | 204  | 224  | 217  | 176  | 233  | 0.76     | 0.049062 | 242  | 0.73     | 0.094594 |
| 250003_at   | A15g18710 | hypoethetical protein predicted proteins - hypothetical protein                      | 52   | 72   | 71   | 80   | 88   | 66   | 65   | 78   | 0.83     | 0.230457 | 41   | 40  | 38   | 52   | 82   | 43   | 41   | 43   | 40   | 52   | 0.75     | 0.277154 | 59   | 0.67     | 0.180856 |
| 250004_at   | A15g18750 | outvative ornetin predicted proteins - Ars DNAI heat shock N-terminal domain-co      | 184  | 234  | 258  | 279  | 283  | 218  | 225  | 260  | 0.87     | 0.317555 | 156  | 128 | 157  | 207  | 159  | 151  | 186  | 179  | 147  | 177  | 0.83     | 0.096338 | 172  | 0.85     | 0.270479 |
| 250005_at   | A15g18760 | outvative protein predicted proteins - Ars zinc finger (C3HC4-type RING finger) fa   | 95   | 132  | 157  | 171  | 182  | 150  | 128  | 168  | 0.76     | 0.120562 | 128  | 125 | 140  | 162  | 146  | 149  | 162  | 179  | 131  | 168  | 0.78     | 0.018018 | 159  | 0.82     | 0.083612 |
| 250006_at   | A15g18660 | putative protein C2-Hydroxylase n isoflavone reductase-related                       | 142  | 213  | 244  | 247  | 190  | 183  | 227  | 0.81 | 0.132240 | 162      | 156  | 197 | 242  | 207  | 218  | 212  | 219  | 218  | 212  | 0.78 | 0.011567 | 218      | 0.79 | 0.061119 |          |
| 250007_at   | A15g18670 | beta-amy-lase-like protein beta-amy-lase-beta-amy-lase, putative (BMV3) / 1,4-ald    | 1216 | 2100 | 1823 | 963  | 1156 | 674  | 1713 | 931  | 1.84     | 0.057726 | 664  | 703 | 590  | 767  | 762  | 559  | 634  | 620  | 653  | 668  | 0.98     | 0.800938 | 696  | 0.94     | 0.598906 |
| 250008_at   | A15g18630 | triacylglycerol lipase-like protein triacyl lipase class 3 family protein            | 102  | 186  | 188  | 143  | 159  | 110  | 159  | 138  | 1.16     | 0.530433 | 112  | 116 | 114  | 138  | 120  | 101  | 133  | 121  | 114  | 123  | 0.93     | 0.357673 | 120  | 0.95     | 0.637191 |
| 249974_at   | A15g18780 | outvative protein predicted proteins - Ars F-box family protein                      | 80   | 103  | 129  | 105  | 122  | 96   | 104  | 108  | 0.96     | 0.823657 | 90   | 94  | 91   | 113  | 94   | 96   | 137  | 120  | 91   | 112  | 0.82     | 0.101510 | 101  | 0.91     | 0.187471 |
| 249975_s_at | A15g18790 | ribosomal protein L33 - like ribosomal / ribosomal protein L33 family protein /// ri | 374  | 488  | 475  | 533  | 628  | 487  | 446  | 549  | 0.81     | 0.132240 | 475  | 520 | 519  | 784  | 605  | 547  | 559  | 571  | 505  | 609  | 0.83     | 0.102793 | 698  | 0.79     | 0.114021 |
| 249976_at   | A15g18810 | Serine/arginine rich protein - like Serin SC35-like solcino factor, 28 kD (SCL28)    | 28   | 26   | 35   | 36   | 34   | 36   | 30   | 35   | 0.84     | 0.130662 | 23   | 28  | 26   | 30   | 26   | 22   | 21   | 22   | 26   | 24   | 1.06     | 0.567021 | 26   | 0.99     | 0.939302 |
| 249977_at   | A15g18820 | chaperonin 60 alpha chain - like protein chaperonin, putative                        | 54   | 66   | 81   | 81   | 70   | 62   | 77   | 80   | 0.042756 | 55       | 55   | 64  | 72   | 61   | 54   | 67   | 68   | 58   | 64   | 0.90 | 0.245600 | 62       | 0.94 | 0.545814 |          |
| 249978_at   | A15g18850 | putative protein expressed protein                                                   | 50   | 77   | 108  | 82   | 76   | 59   | 78   | 73   | 0.88     | 0.764232 | 76   | 105 | 75   | 132  | 87   | 100  | 136  | 117  | 85   | 114  | 0.75     | 0.087933 | 106  | 0.80     | 0.270507 |
| 249979_s_at | A15g18860 | putative protein expressed protein                                                   | 22   | 37   | 36   | 38   | 33   | 19   | 32   | 30   | 1.06     | 0.830396 | 15   | 23  | 23   | 30   | 23   | 23   | 31   | 20   | 26   | 0.78 | 0.103443 | 26       | 0.80 | 0.190747 |          |
| 249980_at   | A15g18870 | putative protein expressed protein                                                   | 17   | 15   | 27   | 17   | 21   | 19   | 18   | 106  | 0.780281 | 20       | 19   | 19  | 15   | 16   | 20   | 18   | 20   | 18   | 20   | 1.11 | 0.130338 | 17       | 1.18 | 0.046768 |          |
| 249949_at   | A15g18880 | SAE1-S9-protein - like SAE1-S9-orotei expressed protein                              | 41   | 49   | 61   | 57   | 59   | 55   | 51   | 57   | 0.89     | 0.336633 | 41   | 36  | 48   | 46   | 35   | 40   | 51   | 51   | 42   | 45   | 0.93     | 0.568434 | 40   | 1.03     | 0.783568 |
| 249950_at   | A15g18910 | protein kinase - like protein Plo kinase protein kinase family protein               | 30   | 28   | 33   | 27   | 38   | 29   | 30   | 31   | 0.98     | 0.870737 | 22   | 15  | 20   | 19   | 15   | 18   | 23   | 20   | 19   | 19   | 1.01     | 0.936964 | 17   | 1.12     | 0.425309 |
| 249951_at   | A15g18930 | S-adenosyl-L-methionine decarboxylase adenosylmethionine decarboxylase fami          | 113  | 129  | 150  | 163  | 158  | 149  | 130  | 157  | 0.83     | 0.083757 | 106  | 106 | 119  | 148  | 119  | 126  | 117  | 126  | 111  | 127  | 0.87     | 0.081203 | 131  | 0.84     | 0.102622 |
| 249952_at   | A15g18950 | putative protein predicted proteins, Ars pentatricopeptide (PPR) repeat-containi     | 50   | 62   | 62   | 81   | 71   | 57   | 54   | 70   | 0.78     | 0.118683 | 53   | 43  | 47   | 68   | 54   | 53   | 72   | 62   | 68   | 62   | 0.77     | 0.041697 | 58   | 0.82     | 0.130321 |
| 249953_at   | A15g18960 | FAR1 - like protein far-red impaired res far-red impaired responsive protein, puts   | 155  | 221  | 199  | 230  | 262  | 206  | 192  | 233  | 0.83     | 0.182922 | 169  | 145 | 168  | 197  | 188  | 165  | 189  | 169  | 161  | 182  | 0.88     | 0.077678 | 183  | 0.88     | 0.136331 |
| 249954_at   | A15g18920 | outvative protein - supported by full-len expressed protein                          | 72   | 117  | 103  | 99   | 127  | 88   | 97   | 105  | 0.93     | 0.677210 | 75   | 84  | 88   | 100  | 95   | 83   | 78   | 82   | 87   | 87   | 0.95     | 0.442830 | 92   | 0.90     | 0.201131 |
| 249955_at   | A15g18840 | sugar transporter - like protein orobabi sugar transporter, putative                 | 345  | 442  | 675  | 649  | 710  | 544  | 487  | 634  | 0.77     | 0.248608 | 686  | 745 | 664  | 903  | 752  | 888  | 880  | 698  | 857  | 878  | 0.80     | 0.077697 | 838  | 0.83     | 0.051992 |
| 249956_at   | A15g18940 | putative protein C2G6 protein, Homo Mo25 family protein                              | 217  | 303  | 303  | 309  | 349  | 263  | 303  | 305  | 0.82     | 0.230623 | 256  | 233 | 244  | 364  | 295  | 284  | 295  | 284  | 295  | 294  | 0.79     | 0.019291 | 334  | 0.77     | 0.050706 |
| 249957_at   | A15g18900 | putative protein predicted proteins, Ars oxidoreductase, 2OG-Fe(II) oxynase I        | 342  | 388  | 501  | 528  | 587  | 438  | 410  | 518  | 0.79     | 0.169323 | 420  | 437 | 465  | 687  | 568  | 492  | 488  | 466  | 441  | 538  | 0.82     | 0.124815 | 579  | 0.76     | 0.078837 |
| 249958_at   | A15g18970 | plasma membrane associated protein AWPM-19-like membrane family protein              | 120  | 102  | 122  | 145  | 200  | 154  | 108  | 166  | 0.65     | 0.052595 | 134  | 156 | 131  | 249  | 158  | 188  | 187  | 178  | 140  | 188  | 0.75     | 0.074792 | 192  | 0.73     | 0.160954 |
| 249959_at   | A15g18800 | NADH:ubiquinone oxidoreductase - like NADH:ubiquinone oxidoreductase 19 kD           | 620  | 820  | 747  | 888  | 1024 | 855  | 723  | 923  | 0.78     | 0.054498 | 807  | 828 | 887  | 1165 | 993  | 892  | 921  | 925  | 941  | 979  | 0.86     | 0.087926 | 1107 | 0.83     | 0.101825 |
| 249960_at   | A15g18850 | putative protein predicted protein, Ars oxoanase oxoanase-binding protein-like       | 207  | 275  | 297  | 318  | 350  | 268  | 260  | 312  | 0.83     | 0.232612 | 214  | 185 | 246  | 327  | 249  | 215  | 232  | 215  | 232  | 215  | 0.84     | 0.215690 | 264  | 0.82     | 0.264406 |
| 249961_at   | A15g18770 | outvative protein predicted proteins, Ars F-box family protein                       | 159  | 210  | 194  | 211  | 254  | 170  | 188  | 212  | 0.89     | 0.453796 | 147  | 131 | 138  | 183  | 168  | 156  | 191  | 177  | 139  | 175  | 0.79     | 0.006329 | 169  | 0.82     | 0.030221 |
| 249962_at   | A15g18990 | pectin methyl esterase -like protein ecto pectinesterase family protein              | 30   | 36   | 49   | 19   | 21   | 39   | 19   | 1.99 | 0.028245 | 81       | 97   | 68  | 14   | 18   | 16   | 18   | 16   | 18   | 15   | 5.49 | 0.700441 | 15       | 5.52 | 0.001375 |          |
| 249963_at   | A15g19000 | putative protein SPECPLC-TYPE POZ speckle-type POZ protein-related                   | 241  | 320  | 285  | 350  | 367  | 302  | 282  | 340  | 0.83     | 0.127173 | 288  | 238 | 239  | 413  | 327  | 249  | 396  | 346  | 255  | 346  | 0.74     | 0.085066 | 330  | 0.77     | 0.212110 |
| 249964_at   | A15g19010 | MAP kinase - like protein ATPMG, Ars nitogen-activated protein kinase, putati        | 313  | 369  | 351  | 437  | 463  | 344  | 344  | 416  | 0.83     | 0.151513 | 263  | 261 | 293  | 360  | 309  | 245  | 329  | 305  | 272  | 310  | 0.88     | 0.202596 | 308  | 0.88     | 0.402423 |
| 249965_at   | A15g19020 | putative protein predicted proteins, Ars pentatricopeptide (PPR) repeat-containi     | 91   | 111  | 118  | 130  | 141  | 125  | 107  | 132  | 0.81     | 0.053630 | 112  | 83  | 107  | 129  | 116  | 98   | 146  | 124  | 101  | 123  | 0.82     | 0.126517 | 114  | 0.88     | 0.340972 |
| 249966_at   | A15g19030 | outvative protein COLD-INDUCIBLE RR RNA recognition motif (RRM)-containin            | 104  | 150  | 169  | 145  | 171  | 139  | 141  | 152  | 0.93     | 0.646601 | 89   | 181 | 154  | 220  | 155  | 116  | 167  | 155  | 141  | 162  | 0.87     | 0.504854 | 163  | 0.86     | 0.141832 |
| 249967_at   | A15g19050 | putative protein expressed protein                                                   | 125  | 148  | 159  | 165  | 188  | 156  | 144  | 170  | 0.85     | 0.131801 | 148  | 174 | 156  | 232  | 177  | 160  | 180  | 159  | 159  | 182  | 0.88     | 0.278917 | 190  | 0.84     | 0.258227 |
| 249968_at   | A15g19070 | outvative protein predicted proteins, Ars expressed protein                          | 104  | 129  | 167  | 178  | 212  | 167  | 133  | 185  | 0.72     | 0.083104 | 109  | 140 | 143  | 154  | 131  | 158  | 149  | 161  | 154  | 151  | 0.78     | 0.078922 | 174  | 0.75     | 0.125951 |
| 249969_at   | A15g19080 | putative protein glycine-rich protein GF heavy-metal-associated domain-contain       | 792  | 943  | 1041 | 1183 | 1312 | 1087 | 925  | 1194 | 0.77     | 0.058011 | 833  | 881 | 823  | 1281 | 963  | 973  | 846  | 1023 | 863  | 973  | 0.83     | 0.097181 | 1084 | 0.87     | 0.076159 |
| 249970_at   | A15g19100 | dermal glycoprotein precursor -like pro extracellular dermal glycoprotein-related    | 41   | 53   | 50   | 48   | 57   | 45   | 52   | 0.87 | 0.233734 | 39       | 37   | 47  | 44   | 35   | 39   | 51   | 47   | 41   | 43   | 0.96 | 0.703628 | 39       | 1.05 | 0.623452 |          |
| 249971_at   | A15g19110 | dermal glycoprotein - like dermal glyco extracellular dermal glycoprotein-related    | 58   | 88   | 85   | 41   | 56   | 49   | 77   | 49   | 1.58     | 0.051947 | 36   | 53  | 34   | 34   | 49   | 44   | 45   | 45   | 41   | 43   | 0.95     | 0.686653 | 42   | 0.97     | 0.873506 |
| 249972_at   | A15g19040 | RNA isoenzyme/transferase -like orote RNA isoenzyme/transferase -like orote          | 30   | 35   | 47   | 46   | 46   | 50   | 38   | 47   | 0.80     | 0.147958 | 27   | 26  | 37   | 34   | 25   | 29   | 35   | 36   | 30   | 32   | 0.95     | 0.685679 | 29   | 1.03     | 0.837688 |
| 249973_at   | A15g19130 | GPA41 - like protein glycosyltransferase GPI translocase component family cr         | 236  | 269  | 290  | 309  | 267  | 268  | 301  | 282  | 0.98     | 0.239867 | 261  | 238 | 244  | 368  | 188  | 232  | 244  | 179  | 225  | 244  | 0.78     | 0.070613 | 295  | 0.86     | 0.248184 |

|             |           |                                            |                                                                    |      |      |      |      |      |      |      |          |          |          |     |      |     |      |     |     |      |      |      |      |          |          |          |          |          |          |
|-------------|-----------|--------------------------------------------|--------------------------------------------------------------------|------|------|------|------|------|------|------|----------|----------|----------|-----|------|-----|------|-----|-----|------|------|------|------|----------|----------|----------|----------|----------|----------|
| 249905_at   | A15g22710 | unknown protein                            | expressed protein                                                  | 80   | 135  | 122  | 110  | 155  | 94   | 112  | 120      | 0.94     | 0.773019 | 72  | 83   | 67  | 85   | 79  | 90  | 85   | 84   | 74   | 85   | 0.87     | 0.042706 | 85       | 0.87     | 0.128075 |          |
| 249906_at   | A15g22730 | unknown protein                            | F-box family protein                                               | 187  | 262  | 270  | 250  | 291  | 222  | 240  | 254      | 0.94     | 0.887672 | 190 | 167  | 178 | 235  | 186 | 179 | 258  | 233  | 178  | 218  | 0.82     | 0.107509 | 200      | 0.89     | 0.320558 |          |
| 249907_at   | A15g22750 | putative ornithine DNA repair protein RAI  | SNF2 domain-containing protein / helica                            | 74   | 85   | 98   | 104  | 100  | 92   | 86   | 99       | 0.87     | 0.180009 | 54  | 52   | 65  | 73   | 61  | 58  | 67   | 61   | 57   | 62   | 0.92     | 0.337781 | 64       | 0.89     | 0.299562 |          |
| 249908_at   | A15g22760 | putative protein similar to unknown prot   | PHD finger                                                         | 251  | 315  | 314  | 354  | 369  | 291  | 365  | 319      | 0.85     | 0.101743 | 302 | 219  | 174 | 234  | 249 | 210 | 264  | 249  | 262  | 210  | 0.82     | 0.070411 | 246      | 0.82     | 0.303099 |          |
| 249909_s_at | A15g22780 | alpha-actinin                              | actinin domain protein // actodin family c                         | 713  | 275  | 278  | 264  | 316  | 240  | 255  | 273      | 0.93     | 0.584985 | 170 | 162  | 184 | 228  | 174 | 158 | 204  | 198  | 172  | 192  | 0.89     | 0.276019 | 187      | 0.92     | 0.549883 |          |
| 249910_at   | A15g22630 | chorismate mutase/prephenate dehydr        | prephenate dehydratase family protein                              | 280  | 144  | 161  | 273  | 284  | 243  | 143  | 266      | 0.54     | 0.001556 | 111 | 133  | 142 | 230  | 210 | 159 | 189  | 166  | 129  | 191  | 0.67     | 0.016939 | 200      | 0.64     | 0.037225 |          |
| 249911_at   | A15g22740 | glucosyltransferase-like protein           | suap; glycosyl transferase family 2 protein                        | 124  | 411  | 415  | 380  | 435  | 338  | 369  | 384      | 0.96     | 0.780618 | 255 | 232  | 276 | 424  | 344 | 335 | 428  | 377  | 254  | 381  | 0.67     | 0.003661 | 367      | 0.69     | 0.022004 |          |
| 249912_at   | A15g22790 | putative protein similar to unknown prot   | putative protein                                                   | 271  | 289  | 287  | 343  | 406  | 251  | 343  | 292      | 0.73     | 0.000950 | 214 | 234  | 254 | 334  | 294 | 241 | 338  | 297  | 258  | 297  | 0.82     | 0.055116 | 297      | 0.81     | 0.163651 |          |
| 249913_at   | A15g22810 | GDSL-motif lipase/hydrolase-like prot      | GDSL-motif lipase, putative                                        | 27   | 26   | 26   | 30   | 25   | 26   | 27   | 0.99     | 0.806151 | 26       | 32  | 23   | 23  | 22   | 20  | 20  | 23   | 27   | 22   | 126  | 0.046055 | 22       | 1.24     | 0.137193 |          |          |
| 249914_at   | A15g22850 | protease-like protein                      | asparaginyl protease family protein                                | 219  | 324  | 337  | 323  | 445  | 275  | 293  | 347      | 0.84     | 0.436099 | 235 | 224  | 221 | 304  | 254 | 250 | 301  | 318  | 227  | 286  | 0.70     | 0.020180 | 270      | 0.84     | 0.074186 |          |
| 249915_at   | A15g22870 | putative protein similar to unknown prot   | haraon-inducible protein-related / HIN1-re                         | 12   | 14   | 14   | 16   | 17   | 19   | 13   | 17       | 0.78     | 0.018764 | 11  | 13   | 14  | 20   | 15  | 15  | 15   | 12   | 13   | 16   | 0.83     | 0.218804 | 17       | 0.76     | 0.101516 |          |
| 249916_at   | A15g22890 | histone H2B like protein (emb)CA6A60       | histone H2B like protein (emb)CA6A60                               | 1019 | 1238 | 1205 | 1353 | 1388 | 1311 | 1154 | 1360     | 0.85     | 0.026881 | 858 | 882  | 973 | 1298 | 981 | 889 | 1201 | 1156 | 904  | 1105 | 0.82     | 0.089823 | 1056     | 0.86     | 0.305388 |          |
| 249982_at   | A15g22900 | putative protein contains similarity to C  | zinc finger (C2H2 type) family protein                             | 56   | 72   | 104  | 133  | 127  | 77   | 127  | 0.61     | 0.022492 | 55       | 57  | 77   | 135 | 110  | 113 | 88  | 85   | 63   | 106  | 0.59 | 0.010633 | 119      | 0.53     | 0.007655 |          |          |
| 249983_at   | A15g22900 | Na+/H+ antiporter-like protein             | cation/hydrogen exchanger, putative (C)                            | 18   | 19   | 20   | 21   | 19   | 21   | 19   | 20       | 0.93     | 0.151383 | 17  | 20   | 20  | 19   | 14  | 18  | 20   | 17   | 19   | 18   | 1.08     | 0.405383 | 17       | 1.10     | 0.386434 |          |
| 249984_at   | A15g22910 | Na+/H+ antiporter-like protein             | cation/hydrogen exchanger, putative (C)                            | 24   | 27   | 25   | 29   | 28   | 35   | 25   | 31       | 0.83     | 0.107882 | 19  | 19   | 20  | 24   | 18  | 21  | 25   | 20   | 19   | 22   | 0.89     | 0.249660 | 21       | 0.92     | 0.427342 |          |
| 249985_at   | A15g22940 | putative protein stroma similarity to unk  | exostosis family protein                                           | 664  | 684  | 664  | 612  | 754  | 552  | 671  | 639      | 1.05     | 0.633255 | 639 | 589  | 674 | 845  | 711 | 615 | 760  | 762  | 634  | 739  | 0.86     | 0.097914 | 724      | 0.88     | 0.276423 |          |
| 249984_at   | A15g22940 | putative protein contains similarity to    | serine carboxypeptidase S10 family prot                            | 187  | 283  | 314  | 24   | 27   | 23   | 261  | 25       | 10.58    | 0.003517 | 943 | 1165 | 974 | 31   | 27  | 48  | 30   | 26   | 1028 | 32   | 31.66    | 0.000001 | 35       | 29.02    | 0.000142 |          |
| 249985_at   | A15g22980 | serine carboxypeptidase                    | serine carboxypeptidase III, putative                              | 49   | 53   | 56   | 47   | 54   | 56   | 52   | 52       | 1.00     | 0.995972 | 35  | 35   | 47  | 33   | 43  | 41  | 44   | 41   | 39   | 41   | 0.97     | 0.768830 | 39       | 1.01     | 0.941231 |          |
| 249987_at   | A15g22990 | C2H2-type zinc finger protein-like         | zinc finger (C2H2 type) family protein                             | 17   | 11   | 17   | 14   | 14   | 16   | 15   | 15       | 1.01     | 0.932456 | 11  | 15   | 15  | 10   | 11  | 10  | 13   | 10   | 14   | 11   | 1.26     | 0.888258 | 10       | 1.35     | 0.077022 |          |
| 249985_at   | A15g23000 | myb-related transcription factor-like      | myb family transcription factor (MYB37)                            | 28   | 33   | 39   | 31   | 36   | 27   | 33   | 31       | 1.05     | 0.795041 | 20  | 21   | 20  | 23   | 16  | 21  | 24   | 21   | 20   | 21   | 0.97     | 0.778705 | 20       | 1.03     | 0.621369 |          |
| 249959_at   | A15g22840 | serine protein kinase-like protein         | -suap; protein kinase family protein                               | 138  | 179  | 154  | 168  | 182  | 152  | 157  | 167      | 0.94     | 0.510881 | 134 | 134  | 157 | 183  | 170 | 142 | 175  | 164  | 142  | 167  | 0.85     | 0.058243 | 165      | 0.86     | 0.177592 |          |
| 249860_at   | A15g22860 | orolvicarbonylase-like protein             | -suap; serine carboxypeptidase S28 family prot                     | 32   | 32   | 58   | 45   | 54   | 41   | 48   | 0.85     | 0.476993 | 26       | 29  | 26   | 27  | 21   | 22  | 27  | 24   | 27   | 24   | 1.11 | 0.215703 | 24       | 1.15     | 0.192447 |          |          |
| 249861_at   | A15g22875 | Expressed protein                          | - supported by full-length expressed protein                       | 211  | 276  | 247  | 260  | 311  | 223  | 245  | 265      | 0.92     | 0.559352 | 290 | 287  | 305 | 413  | 360 | 326 | 318  | 326  | 294  | 349  | 0.84     | 0.060910 | 366      | 0.80     | 0.048525 |          |
| 249862_at   | A15g22920 | PCPD14 protein                             | - supported by full-length zinc finger (C3H4C-type RING finger) fa | 1406 | 2676 | 2722 | 690  | 1100 | 543  | 2268 | 778      | 2.32     | 0.032715 | 519 | 780  | 398 | 631  | 652 | 594 | 565  | 537  | 566  | 596  | 0.95     | 0.740128 | 626      | 0.90     | 0.625876 |          |
| 249863_at   | A15g22950 | putative protein contains similarity to    | coron SNF7 family protein                                          | 240  | 308  | 323  | 361  | 400  | 346  | 290  | 369      | 0.79     | 0.059553 | 300 | 327  | 331 | 483  | 401 | 365 | 326  | 329  | 331  | 323  | 378      | 0.85     | 0.219166 | 401      | 0.79     | 0.103420 |
| 249864_at   | A15g22830 | putative protein similar to unknown prot   | magnesium transporter CorA-like family                             | 206  | 297  | 248  | 357  | 369  | 269  | 250  | 331      | 0.75     | 0.118105 | 253 | 226  | 265 | 435  | 312 | 273 | 295  | 265  | 248  | 316  | 0.78     | 0.155683 | 340      | 0.73     | 0.140129 |          |
| 249865_at   | A15g22820 | putative protein                           | - supported by cDNA: expressed protein                             | 66   | 79   | 95   | 93   | 95   | 73   | 80   | 87       | 0.92     | 0.556880 | 41  | 47   | 45  | 70   | 54  | 43  | 55   | 54   | 44   | 55   | 0.80     | 0.107238 | 56       | 0.79     | 0.219784 |          |
| 249866_at   | A15g23010 | 2-isooxovalimate synthase-like             | homol 2-isopropylmalate synthase 3 (IMS3)                          | 26   | 26   | 43   | 38   | 37   | 32   | 32   | 36       | 0.89     | 0.547053 | 23  | 21   | 29  | 25   | 21  | 22  | 26   | 24   | 24   | 1.02 | 0.812388 | 23       | 1.07     | 0.622167 |          |          |
| 249867_at   | A15g23020 | 2-isooxovalimate synthase-like             | homol 2-isopropylmalate synthase 2 (IMS2)                          | 16   | 16   | 14   | 14   | 14   | 14   | 14   | 14       | 0.85     | 0.538813 | 12  | 12   | 16  | 16   | 16  | 16  | 16   | 16   | 16   | 16   | 0.83     | 0.834941 | 16       | 0.84     | 0.025553 |          |
| 249868_at   | A15g23030 | sensence-associated protein 5-like p       | sensence-associated family protein                                 | 16   | 18   | 21   | 22   | 22   | 27   | 18   | 24       | 0.77     | 0.066694 | 19  | 17   | 18  | 18   | 15  | 18  | 21   | 21   | 18   | 19   | 0.99     | 0.891736 | 17       | 1.09     | 0.288779 |          |
| 249869_at   | A15g23050 | acetyl-CoA synthetase-like protein         | acyl-activating enzyme 17 (AAE17)                                  | 273  | 457  | 532  | 332  | 406  | 275  | 421  | 338      | 1.25     | 0.389263 | 298 | 326  | 284 | 346  | 320 | 296 | 391  | 386  | 303  | 348  | 0.87     | 0.135472 | 321      | 0.94     | 0.398005 |          |
| 249870_at   | A15g23080 | unknown protein                            | SWAP (Suppressor-of-White-Africa) like                             | 142  | 180  | 181  | 170  | 194  | 139  | 168  | 188      | 1.00     | 0.995251 | 137 | 131  | 130 | 146  | 146 | 117 | 162  | 140  | 133  | 146  | 0.91     | 0.318018 | 142      | 0.93     | 0.542753 |          |
| 249871_at   | A15g23110 | putative protein similar to unknown prot   | zinc finger (C3H4C-type RING finger) fa                            | 186  | 245  | 222  | 230  | 274  | 178  | 219  | 227      | 0.96     | 0.783565 | 178 | 140  | 167 | 202  | 203 | 157 | 180  | 162  | 188  | 0.86 | 0.115600 | 167      | 0.86     | 0.047496 |          |          |
| 249872_at   | A15g23130 | unknown protein                            | peptidyl-carbinol-binding LysM domain-co                           | 100  | 127  | 129  | 125  | 138  | 93   | 118  | 119      | 1.00     | 0.983480 | 75  | 77   | 72  | 101  | 79  | 71  | 101  | 88   | 75   | 88   | 0.85     | 0.148825 | 84       | 0.89     | 0.384570 |          |
| 249873_at   | A15g23140 | ATP-dependent Clot protease proteol        | ATP-dependent Clot protease proteol                                | 378  | 480  | 492  | 476  | 573  | 410  | 450  | 487      | 0.93     | 0.574893 | 566 | 563  | 537 | 831  | 616 | 638 | 616  | 566  | 555  | 653  | 0.85     | 0.162074 | 695      | 0.80     | 0.112083 |          |
| 249874_at   | A15g23070 | putative protein contains similarity to th | thymidine kinase, putative                                         | 195  | 248  | 258  | 321  | 301  | 281  | 233  | 301      | 0.78     | 0.041420 | 216 | 208  | 267 | 400  | 297 | 265 | 299  | 266  | 230  | 305  | 0.75     | 0.079956 | 321      | 0.72     | 0.112982 |          |
| 249875_at   | A15g23120 | photosystem I stability/assembly fac       | photosystem I stability/assembly fac                               | 322  | 553  | 549  | 494  | 553  | 454  | 474  | 485      | 0.98     | 0.001208 | 388 | 439  | 428 | 594  | 455 | 470 | 514  | 471  | 419  | 500  | 0.84     | 0.070595 | 506      | 0.83     | 0.402555 |          |
| 249876_at   | A15g23060 | putative protein similar to unknown prot   | expressed protein                                                  | 167  | 254  | 199  | 221  | 222  | 167  | 206  | 203      | 1.02     | 0.923952 | 114 | 158  | 148 | 249  | 155 | 120 | 179  | 181  | 140  | 177  | 0.79     | 0.265428 | 175      | 0.80     | 0.445556 |          |
| 249877_at   | A15g23150 | transcription factor-like protein (obiA    | AD PPWP domain-containing protein                                  | 80   | 111  | 120  | 131  | 130  | 113  | 104  | 125      | 0.83     | 0.193271 | 108 | 106  | 112 | 148  | 118 | 102 | 124  | 114  | 109  | 121  | 0.90     | 0.265839 | 123      | 0.88     | 0.354128 |          |
| 249878_at   | A15g23090 | TATA-binding protein-associated cho        | TATA-binding protein-associated cho                                | 128  | 177  | 224  | 229  | 257  | 186  | 176  | 224      | 0.79     | 0.242541 | 157 | 195  | 188 | 262  | 230 | 201 | 213  | 221  | 180  | 223  | 0.81     | 0.050084 | 228      | 0.79     | 0.113658 |          |
| 249879_at   | A15g23170 | serine/threonine protein kinase-like       | serine/threonine protein kinase-like prot                          | 40   | 42   | 62   | 74   | 81   | 72   | 48   | 46       | 0.63     | 0.020698 | 39  | 36   | 47  | 68   | 50  | 46  | 45   | 41   | 52   | 0.78 | 0.117153 | 56       | 0.72     | 0.090607 |          |          |
| 249880_at   | A15g23180 | putative protein similar to unknown prot   | hypothetical protein                                               | 33   | 33   | 39   | 44   | 39   | 33   | 39   | 39       | 0.99     | 0.897302 | 31  | 31   | 32  | 32   | 32  | 32  | 32   | 32   | 32   | 32   | 1.17     | 0.208655 | 32       | 1.08     | 0.542736 |          |
| 249881_at   | A15g23190 | cytochrome P450-like protein               | cytochrome P450 family protein                                     | 18   | 21   | 30   | 30   | 33   | 34   | 23   | 32       | 0.70     | 0.068416 | 15  | 22   | 27  | 21   | 24  | 22  | 26   | 19   | 21   | 22   | 0.96     | 0.778254 | 22       | 0.97     | 0.848376 |          |
| 249884_at   | A15g23210 | serine carboxypeptidase II-like protein    | serine carboxypeptidase S10 family prot                            | 184  | 182  | 245  | 211  | 204  | 201  | 204  | 205      | 0.99     | 0.943529 | 297 | 320  | 257 | 338  | 277 | 231 | 366  | 347  | 291  | 312  | 0.93     | 0.589930 | 282      | 1.03     | 0.806658 |          |
| 249884_at   | A15g23220 | putative protein similar to unknown prot   | isochismatase hydrolase family protein                             | 12   | 12   | 20   | 23   | 17   | 20   | 0.83 | 0.307151 | 15       | 16       | 19  | 11   | 14  | 12   | 27  | 15  | 17   | 16   | 14   | 0.87 | 0.876468 | 13       | 1.31     | 0.060400 |          |          |
| 249884_at   | A15g23230 | putative protein similar to unknown prot   | isochismatase hydrolase family protein                             | 10   | 47   | 52   | 54   | 53   | 50   | 47   | 52       | 0.80     | 0.143126 | 52  | 57   | 58  | 56   | 53  | 50  | 56   | 53   | 50   | 56   | 1.05     | 0.338449 | 54       | 0.94     | 0.047631 |          |
| 249890_at   | A15g23240 | putative protein similar to unknown prot   | AD heat shock N-terminal domain-co                                 | 24   | 28   | 48   | 34   | 31   | 28   | 33   | 28       | 1.20     | 0.515678 |     |      |     |      |     |     |      |      |      |      |          |          |          |          |          |          |

|           |           |                                                                                       |      |      |      |      |      |      |      |       |          |          |          |      |      |      |      |      |      |      |      |      |          |          |      |          |          |
|-----------|-----------|---------------------------------------------------------------------------------------|------|------|------|------|------|------|------|-------|----------|----------|----------|------|------|------|------|------|------|------|------|------|----------|----------|------|----------|----------|
| 249811_at | A15g23760 | unknown protein ,supported by full-length heavy-metal-associated domain-contains      | 64   | 93   | 77   | 108  | 139  | 81   | 78   | 110   | 0.71     | 0.164387 | 84       | 78   | 79   | 168  | 123  | 118  | 111  | 108  | 81   | 126  | 0.64     | 0.021552 | 136  | 0.59     | 0.025207 |
| 249812_at | A15g23830 | putative protein similar to unknown prol MD-2-related lipid recognition domain-cc     | 29   | 43   | 40   | 46   | 55   | 45   | 37   | 48    | 0.77     | 0.103876 | 29       | 22   | 31   | 25   | 21   | 29   | 26   | 25   | 27   | 25   | 1.09     | 0.431610 | 25   | 1.10     | 0.512408 |
| 249813_at | A15g23940 | acetyltransferase , supported by full-length transferase family protein               | 1178 | 1362 | 1276 | 1905 | 2098 | 1618 | 1272 | 1874  | 0.68     | 0.015764 | 1070     | 1101 | 1143 | 1923 | 1440 | 1228 | 1379 | 1375 | 1105 | 1469 | 0.75     | 0.062009 | 1530 | 0.72     | 0.108602 |
| 249814_at | A15g24000 | putative protein similar to unknown prol MD-2-related lipid recognition domain-cc     | 37   | 49   | 36   | 34   | 34   | 39   | 31   | 1.26  | 0.105491 | 19       | 31       | 26   | 23   | 18   | 24   | 23   | 23   | 24   | 23   | 23   | 0.57     | 0.7971   | 23   | 0.69     | 0.056567 |
| 249815_at | A15g23900 | 60S ribosomal protein L13 , supported: 60S ribosomal protein L13 (RPL13D)             | 1748 | 2021 | 2176 | 2041 | 2311 | 1846 | 1982 | 2066  | 0.96     | 0.670379 | 1067     | 2137 | 2121 | 2646 | 2198 | 2131 | 1975 | 2174 | 2075 | 2225 | 0.93     | 0.370663 | 2325 | 0.89     | 0.216603 |
| 249816_at | A15g23880 | cleavage and polyadenylation specific cleavage and polyadenylation specificity        | 309  | 384  | 360  | 411  | 464  | 384  | 351  | 420   | 0.84     | 0.090248 | 317      | 239  | 311  | 379  | 344  | 277  | 354  | 338  | 289  | 338  | 0.85     | 0.137247 | 373  | 0.87     | 0.317296 |
| 249817_at | A15g23820 | putative protein similar to unknown prol MD-2-related lipid recognition domain-cc     | 349  | 395  | 411  | 262  | 376  | 286  | 385  | 308   | 1.25     | 0.122965 | 254      | 220  | 266  | 277  | 273  | 286  | 250  | 230  | 247  | 263  | 0.94     | 0.376238 | 278  | 0.89     | 0.091664 |
| 249818_at | A15g23860 | Exonuclease , supported by cDNA subunit 1 (TU68) (TU68B)                              | 223  | 197  | 223  | 301  | 305  | 198  | 281  | 0.71  | 0.136847 | 35       | 38       | 39   | 35   | 32   | 36   | 39   | 31   | 38   | 35   | 1.08 | 0.219637 | 35       | 1.09 | 0.152587 |          |
| 249791_at | A15g23810 | amino acid transporter , supported by : amino acid transporter/ family protein        | 32   | 43   | 47   | 50   | 56   | 45   | 41   | 51    | 0.80     | 0.141120 | 29       | 30   | 36   | 34   | 32   | 44   | 43   | 31   | 32   | 37   | 0.87     | 0.284647 | 37   | 0.87     | 0.351519 |
| 249790_at | A15g23960 | (+)-delta-cadinene synthase (delta-cadinene terpene synthase/cyclase family protein   | 36   | 66   | 46   | 184  | 129  | 123  | 49   | 146   | 0.34     | 0.010609 | 54       | 46   | 60   | 249  | 174  | 164  | 105  | 107  | 53   | 160  | 0.33     | 0.023031 | 195  | 0.27     | 0.006220 |
| 249781_at | A15g23970 | acetyl-CoA:benzylalcohol acetyltransferase transferase family protein                 | 29   | 31   | 33   | 34   | 36   | 30   | 27   | 33    | 0.82     | 0.308650 | 20       | 25   | 25   | 21   | 18   | 20   | 22   | 19   | 23   | 20   | 1.14     | 0.075906 | 20   | 1.16     | 0.134415 |
| 249782_at | A15g24020 | putative protein contains similarity to ur expressed protein                          | 75   | 98   | 92   | 105  | 90   | 105  | 90   | 113   | 0.83     | 0.481777 | 76       | 97   | 96   | 113  | 79   | 87   | 109  | 103  | 89   | 98   | 0.91     | 0.421481 | 93   | 0.96     | 0.735900 |
| 249783_at | A15g24010 | receptor-like protein kinase family protein                                           | 112  | 98   | 129  | 123  | 98   | 112  | 113  | 120   | 0.94     | 0.674687 | 116      | 113  | 117  | 113  | 131  | 100  | 141  | 145  | 115  | 138  | 0.83     | 0.195615 | 134  | 0.86     | 0.417169 |
| 249784_at | A15g24020 | septom site-determining MinD (dbiBAAP septum site-determining protein (MIND)          | 51   | 223  | 205  | 218  | 272  | 201  | 193  | 230   | 0.84     | 0.290455 | 194      | 225  | 218  | 284  | 213  | 202  | 266  | 252  | 212  | 243  | 0.87     | 0.204402 | 233  | 0.91     | 0.487006 |
| 249785_at | A15g24030 | putative protein contains similarity to ur C4-dicarboxylate transporter/malic acid l  | 151  | 228  | 74   | 70   | 72   | 72   | 61   | 73    | 0.84     | 0.172364 | 45       | 48   | 54   | 56   | 53   | 54   | 67   | 59   | 49   | 58   | 0.85     | 0.067696 | 54   | 0.90     | 0.153469 |
| 249786_at | A15g24070 | peroxidase-like protein                                                               | 32   | 32   | 43   | 35   | 39   | 49   | 36   | 41    | 0.87     | 0.369272 | 36       | 29   | 46   | 34   | 31   | 32   | 37   | 37   | 37   | 34   | 1.08     | 0.547502 | 32   | 1.14     | 0.430775 |
| 249787_at | A15g24090 | acidic endonuclease (dbiBA21861.1) acidic endonuclease (CHB1)                         | 33   | 39   | 40   | 39   | 45   | 42   | 38   | 38    | 0.84     | 0.357560 | 24       | 24   | 26   | 24   | 26   | 25   | 28   | 27   | 25   | 26   | 0.95     | 0.290976 | 25   | 1.00     | 0.926845 |
| 249788_at | A15g24100 | receptor-like protein kinase                                                          | 22   | 31   | 41   | 35   | 39   | 35   | 31   | 36    | 0.87     | 0.451465 | 25       | 39   | 37   | 28   | 26   | 25   | 32   | 37   | 34   | 29   | 1.15     | 0.348200 | 26   | 1.29     | 0.156944 |
| 249789_at | A15g24120 | sigma-like factor (emb CAA77213.1) RNA polymerase sigma subunit SigE (si              | 95   | 122  | 125  | 120  | 97   | 96   | 114  | 0.84  | 0.346364 | 76       | 75       | 96   | 136  | 108  | 81   | 94   | 97   | 82   | 103  | 0.80 | 0.161512 | 108      | 0.76 | 0.200472 |          |
| 249770_at | A15g24110 | unknown protein ,supported by full-length WRKY family transcription factor            | 27   | 36   | 42   | 44   | 47   | 39   | 35   | 43    | 0.81     | 0.163939 | 22       | 22   | 19   | 22   | 19   | 18   | 23   | 21   | 20   | 105  | 0.556929 | 20       | 1.06 | 0.507970 |          |
| 249771_at | A15g24080 | receptor-like protein kinase , supported: receptor-like protein kinase family protein | 28   | 26   | 44   | 41   | 36   | 38   | 32   | 38    | 0.84     | 0.357560 | 24       | 24   | 26   | 24   | 26   | 25   | 28   | 27   | 25   | 26   | 0.95     | 0.290976 | 25   | 1.00     | 0.926845 |
| 249772_at | A15g24130 | unknown protein                                                                       | 51   | 61   | 75   | 65   | 63   | 63   | 62   | 64    | 0.98     | 0.857287 | 48       | 52   | 56   | 49   | 44   | 49   | 57   | 48   | 52   | 49   | 1.05     | 0.482542 | 47   | 1.10     | 0.164147 |
| 249773_at | A15g24140 | squalene monooxygenase 2 (squalene squalene monooxygenase 2 / squalene                | 19   | 42   | 24   | 21   | 22   | 28   | 21   | 1.31  | 0.399183 | 11       | 17       | 13   | 15   | 14   | 12   | 13   | 13   | 13   | 13   | 1.03 | 0.809125 | 13       | 1.01 | 0.971223 |          |
| 249774_at | A15g24150 | squalene monooxygenase                                                                | 52   | 62   | 65   | 73   | 64   | 65   | 60   | 67    | 0.89     | 0.198555 | 43       | 47   | 61   | 61   | 52   | 45   | 61   | 59   | 50   | 56   | 0.90     | 0.380582 | 53   | 0.95     | 0.738902 |
| 249775_at | A15g24160 | squalene monooxygenase 1.2 (squalene squalene monooxygenase 1.2 / squalene            | 29   | 29   | 31   | 41   | 35   | 28   | 27   | 35    | 0.77     | 0.139336 | 35       | 43   | 34   | 85   | 59   | 54   | 118  | 101  | 37   | 83   | 0.45     | 0.031196 | 86   | 0.57     | 0.046504 |
| 249776_at | A15g24170 | expressed protein                                                                     | 100  | 135  | 155  | 156  | 165  | 132  | 130  | 151   | 0.86     | 0.324695 | 137      | 156  | 160  | 227  | 154  | 162  | 144  | 146  | 151  | 167  | 0.90     | 0.480552 | 181  | 0.83     | 0.278117 |
| 249777_at | A15g24210 | putative protein similar to unknown prol lipase class 3 family protein                | 53   | 61   | 78   | 75   | 77   | 78   | 64   | 77    | 0.83     | 0.169456 | 43       | 45   | 56   | 58   | 47   | 61   | 49   | 48   | 52   | 0.92 | 0.468485 | 50       | 0.96 | 0.763750 |          |
| 249778_at | A15g24165 | Expressed protein : supported by full-length expressed protein                        | 481  | 827  | 724  | 556  | 622  | 471  | 677  | 549   | 1.23     | 0.315211 | 745      | 855  | 814  | 895  | 777  | 760  | 735  | 781  | 805  | 790  | 1.02     | 0.740175 | 811  | 0.99     | 0.916410 |
| 249779_at | A15g24230 | putative protein similar to unknown prol expressed protein                            | 37   | 41   | 50   | 48   | 56   | 49   | 43   | 51    | 0.84     | 0.164292 | 34       | 55   | 38   | 34   | 32   | 34   | 34   | 37   | 34   | 36   | 1.04     | 0.407382 | 33   | 1.06     | 0.211809 |
| 249780_at | A15g24240 | ubiquitin                                                                             | 205  | 240  | 232  | 233  | 241  | 208  | 193  | 233   | 0.83     | 0.120657 | 170      | 162  | 203  | 208  | 192  | 194  | 157  | 162  | 155  | 163  | 0.94     | 0.570223 | 195  | 0.93     | 0.607899 |
| 249781_at | A15g24250 | unknown protein                                                                       | 33   | 30   | 38   | 45   | 39   | 35   | 34   | 40    | 0.85     | 0.185051 | 26       | 30   | 26   | 26   | 22   | 35   | 31   | 30   | 28   | 108  | 0.533185 | 25       | 1.23 | 0.100489 |          |
| 249782_at | A15g24260 | dipeptidyl peptidase IV-like protein                                                  | 128  | 146  | 168  | 174  | 226  | 175  | 147  | 192   | 0.77     | 0.090932 | 113      | 81   | 122  | 127  | 120  | 121  | 157  | 134  | 106  | 132  | 0.80     | 0.088076 | 123  | 0.86     | 0.249103 |
| 249783_at | A15g24270 | calcium sensor homoloq (dbiAAC2811) prolyl oligopeptidase family protein III ca       | 32   | 40   | 37   | 50   | 49   | 45   | 37   | 48    | 0.76     | 0.014714 | 35       | 31   | 37   | 52   | 42   | 40   | 41   | 31   | 34   | 41   | 0.83     | 0.188000 | 45   | 0.77     | 0.073083 |
| 249784_at | A15g24280 | putative protein similar to unknown prol expressed protein                            | 307  | 369  | 452  | 478  | 343  | 376  | 452  | 0.83  | 0.341862 | 262      | 230      | 296  | 368  | 317  | 281  | 348  | 368  | 262  | 337  | 178  | 0.030718 | 322      | 0.81 | 0.133402 |          |
| 249785_at | A15g24300 | soluble starch synthase                                                               | 257  | 319  | 268  | 411  | 479  | 304  | 281  | 398   | 0.71     | 0.097985 | 230      | 161  | 239  | 333  | 321  | 247  | 284  | 281  | 210  | 293  | 0.72     | 0.021697 | 300  | 0.70     | 0.066790 |
| 249786_at | A15g24310 | putative protein strom similarity to unk expressed protein                            | 104  | 133  | 121  | 168  | 200  | 142  | 119  | 170   | 0.70     | 0.051829 | 109      | 105  | 121  | 211  | 150  | 152  | 135  | 124  | 112  | 154  | 0.72     | 0.079099 | 171  | 0.65     | 0.044495 |
| 249787_at | A15g24320 | putative protein contains similarity to ur WD-40 repeat family protein                | 101  | 119  | 135  | 144  | 143  | 138  | 118  | 141   | 0.84     | 0.089310 | 75       | 83   | 92   | 106  | 86   | 78   | 101  | 100  | 83   | 94   | 0.88     | 0.215350 | 90   | 0.93     | 0.528013 |
| 249788_at | A15g24330 | putative protein contains similarity to ur PHD finger family protein / SET domain-    | 152  | 143  | 211  | 200  | 192  | 170  | 142  | 187   | 0.76     | 0.149895 | 157      | 153  | 171  | 232  | 108  | 163  | 150  | 163  | 160  | 163  | 0.87     | 0.250432 | 166  | 0.81     | 0.446721 |
| 249789_at | A15g24340 | putative protein similar to unknown prol 3'-5' exonuclease domain-containing prc      | 72   | 104  | 104  | 102  | 134  | 95   | 93   | 110   | 0.85     | 0.344278 | 58       | 60   | 69   | 82   | 60   | 62   | 72   | 67   | 62   | 69   | 0.91     | 0.320111 | 68   | 0.92     | 0.512553 |
| 249790_at | A15g24290 | putative protein similar to unknown prol integral membrane family protein             | 19   | 122  | 154  | 184  | 214  | 172  | 132  | 190   | 0.69     | 0.026891 | 129      | 107  | 153  | 179  | 202  | 174  | 278  | 265  | 130  | 220  | 0.59     | 0.026885 | 185  | 0.70     | 0.026067 |
| 249796_at | A15g24313 | Expressed protein : supported by full-length expressed protein                        | 210  | 188  | 24   | 25   | 27   | 25   | 21   | 26    | 0.80     | 0.066033 | 17       | 18   | 20   | 20   | 14   | 15   | 27   | 18   | 18   | 19   | 0.98     | 0.926958 | 16   | 1.14     | 0.348577 |
| 249797_at | A15g24316 | Expressed protein : supported by full-length protein-rich family protein              | 379  | 446  | 587  | 16   | 14   | 471  | 17   | 27.68 | 0.031786 | 1345     | 1413     | 1226 | 23   | 20   | 147  | 57   | 25   | 20   | 1328 | 29   | 45.53    | 0.000000 | 53   | 39.82    | 0.000200 |
| 249798_at | A15g24330 | putative protein similar to unknown prol expressed protein                            | 133  | 154  | 167  | 183  | 199  | 141  | 151  | 174   | 0.87     | 0.313902 | 102      | 101  | 100  | 112  | 101  | 108  | 113  | 109  | 101  | 108  | 0.94     | 0.333833 | 103  | 0.87     | 0.070760 |
| 249799_at | A15g24380 | putative protein contains similarity to in: transporter, putative                     | 69   | 78   | 106  | 97   | 88   | 84   | 84   | 84    | 0.90     | 0.54     | 0.681267 | 52   | 55   | 57   | 58   | 50   | 56   | 60   | 63   | 54   | 0.95     | 0.349169 | 55   | 0.99     | 0.884994 |
| 249800_at | A15g24390 | GTPase activator-like protein of Rab-lik RabGAP/TBC domain-containing prot            | 44   | 46   | 58   | 71   | 71   | 66   | 49   | 69    | 0.71     | 0.015324 | 50       | 50   | 57   | 66   | 60   | 60   | 58   | 54   | 52   | 60   | 0.88     | 0.060511 | 62   | 0.85     | 0.035706 |
| 249728_at | A15g24410 | 6-phosphogluconolactonase-like protein glucosamine/galactosamine-6-phoshat            | 48   | 61   | 76   | 72   | 81   | 63   | 62   | 72    | 0.85     | 0.343696 | 30       | 38   | 36   | 41   | 33   | 39   | 63   | 46   | 35   | 45   | 0.78     | 0.210598 | 38   | 0.92     | 0.416644 |
| 249730_at | A15g24430 | calcium dependent protein kinase-like calcium-dependent protein kinase, outat         | 291  | 368  | 431  | 356  | 361  | 380  | 380  | 0.93  | 0.505087 | 210      | 218      | 247  | 313  | 262  | 215  | 318  | 252  | 225  | 229  | 278  | 0.81     | 0.098711 | 293  | 0.87     | 0.190011 |
| 249731_at | A15g24440 | RNA-binding protein-like RNA-binding protein, putative                                | 42   | 47   | 54   | 53   | 61   | 48   | 48   | 54    | 0.88     | 0.273638 | 32       | 27   | 31   | 29   | 23   | 25   | 28   | 32   | 30   | 28   | 1.08     | 0.410691 | 26   | 1.16     | 0.187325 |
| 249732_at | A15g24420 | 6-phosphogluconolactonase-like protein glucosamine/galactosamine-6-phoshat            |      |      |      |      |      |      |      |       |          |          |          |      |      |      |      |      |      |      |      |      |          |          |      |          |          |

|             |           |                                            |                                            |     |     |     |     |     |     |     |      |          |          |     |     |     |     |     |     |     |     |      |          |          |          |          |          |          |
|-------------|-----------|--------------------------------------------|--------------------------------------------|-----|-----|-----|-----|-----|-----|-----|------|----------|----------|-----|-----|-----|-----|-----|-----|-----|-----|------|----------|----------|----------|----------|----------|----------|
| 249716_at   | A15f35770 | sterile apatase (emb)CAA11128.1            | sterile apatase (SAP)                      | 22  | 22  | 28  | 29  | 27  | 22  | 24  | 26   | 0.91     | 0.463727 | 22  | 29  | 21  | 24  | 23  | 18  | 26  | 33  | 24   | 25       | 0.97     | 0.834110 | 22       | 1.11     | 0.517250 |
| 249717_at   | A15f35730 | unknown protein :supported by full-len     | Exs family protein I/ERD1X/SGY1            | 279 | 322 | 310 | 369 | 425 | 323 | 303 | 372  | 0.81     | 0.089232 | 242 | 206 | 264 | 306 | 308 | 240 | 249 | 262 | 237  | 273      | 0.87     | 0.168550 | 285      | 0.83     | 0.168717 |
| 249718_at   | A15f35740 | outative protein contains similarity to    | 6 glycosyl hydrolase family protein 17     | 125 | 68  | 69  | 89  | 91  | 87  | 67  | 89   | 0.75     | 0.000197 | 56  | 60  | 65  | 98  | 75  | 75  | 88  | 78  | 60   | 83       | 0.73     | 0.010792 | 83       | 0.73     | 0.046248 |
| 249719_at   | A15f35750 | Excessed protein :supported by full-len    | Excessed protein :supported by full-len    | 53  | 52  | 57  | 56  | 143 | 141 | 140 | 151  | 0.36     | 0.007735 | 141 | 140 | 151 | 146 | 133 | 45  | 113 | 39  | 123  | 45       | 0.39     | 0.000513 | 105      | 0.39     | 0.049076 |
| 249720_at   | A15f35700 | fmbirn : supported by cDNA id: 15027       | fmbirn-like protein, putative              | 160 | 148 | 147 | 153 | 169 | 134 | 138 | 152  | 0.91     | 0.372778 | 110 | 101 | 124 | 148 | 118 | 101 | 122 | 111 | 112  | 120      | 0.93     | 0.478361 | 123      | 0.91     | 0.512260 |
| 249693_at   | A15f35750 | histidine kinase-like protein : supporte   | histidine kinase (AHK2)                    | 167 | 104 | 188 | 240 | 234 | 207 | 183 | 227  | 0.81     | 0.027832 | 166 | 142 | 166 | 234 | 214 | 170 | 206 | 199 | 158  | 204      | 0.77     | 0.022381 | 206      | 0.77     | 0.081268 |
| 249694_at   | A15f35790 | glucose-6-phosphate dehydrogenase : g      | glucose-6-phosphate 1-dehydrogenase        | 207 | 390 | 386 | 241 | 301 | 328 | 248 | 132  | 0.298000 | 252      | 256 | 250 | 273 | 248 | 248 | 317 | 293 | 253 | 276  | 0.92     | 0.238667 | 256      | 0.98     | 0.677109 |          |
| 249695_at   | A15f35800 | outative protein pseudocodon               | outative protein pseudocodon               | 12  | 10  | 11  | 12  | 10  | 11  | 11  | 0.98 | 0.016891 | 5        | 6   | 5   | 8   | 7   | 6   | 4   | 8   | 9   | 13   | 1.18     | 0.391312 | 6        | 0.98     | 0.040462 |          |
| 249696_at   | A15f35820 | copa-like retrotransposable element        | copa-like retrotransposon family           | 18  | 17  | 19  | 9   | 10  | 17  | 18  | 19   | 0.97     | 0.620248 | 9   | 11  | 12  | 15  | 11  | 13  | 18  | 15  | 11   | 15       | 0.71     | 0.011556 | 14       | 0.76     | 0.029636 |
| 249695_at   | A15f35830 | ankyrin repeat family protein              | ankyrin repeat family protein              | 25  | 31  | 35  | 37  | 41  | 30  | 30  | 36   | 0.84     | 0.243291 | 24  | 24  | 34  | 29  | 25  | 23  | 30  | 28  | 27   | 27       | 1.01     | 0.948228 | 26       | 1.06     | 0.712424 |
| 249696_at   | A15f35840 | phytochrome C (spP14714)                   | phytochrome C (PHYC)                       | 139 | 172 | 163 | 196 | 194 | 159 | 158 | 183  | 0.87     | 0.189835 | 126 | 115 | 166 | 194 | 176 | 113 | 173 | 181 | 136  | 168      | 0.81     | 0.197122 | 161      | 0.84     | 0.434143 |
| 249697_at   | A15f35850 | unknown protein                            | unknown protein                            | 15  | 16  | 16  | 19  | 20  | 16  | 20  | 16   | 0.20     | 0.002268 | 13  | 13  | 18  | 15  | 15  | 19  | 22  | 15  | 17   | 0.86     | 0.303382 | 17       | 0.89     | 0.453596 |          |
| 249698_at   | A15f35870 | putative protein similar to unknown        | putative protein similar to unknown        | 30  | 35  | 41  | 36  | 35  | 34  | 36  | 35   | 0.90     | 0.300407 | 25  | 32  | 25  | 24  | 25  | 24  | 29  | 26  | 27   | 26       | 1.06     | 0.510871 | 24       | 1.11     | 0.252599 |
| 249699_at   | A15f35880 | putative protein similar to unknown        | putative protein similar to unknown        | 20  | 23  | 21  | 23  | 30  | 29  | 21  | 27   | 0.78     | 0.059158 | 10  | 13  | 12  | 9   | 7   | 10  | 14  | 13  | 12   | 11       | 1.10     | 0.589344 | 9        | 1.34     | 0.081040 |
| 249670_at   | A15f35890 | unknown protein                            | hypothetical protein                       | 14  | 15  | 23  | 16  | 15  | 22  | 17  | 18   | 0.97     | 0.886599 | 15  | 14  | 17  | 14  | 15  | 15  | 20  | 17  | 15   | 16       | 0.96     | 0.692049 | 15       | 1.05     | 0.561192 |
| 249671_at   | A15f35900 | outative protein similar to unknown        | outative protein similar to unknown        | 13  | 11  | 11  | 11  | 11  | 12  | 12  | 11   | 1.03     | 0.693521 | 12  | 10  | 14  | 9   | 11  | 14  | 10  | 10  | 12   | 11       | 1.10     | 0.488358 | 12       | 1.04     | 0.814353 |
| 249672_at   | A15f35910 | 3'-5' exonuclease domain-containin         | 3'-5' exonuclease domain-containin         | 346 | 422 | 419 | 461 | 508 | 382 | 395 | 450  | 0.88     | 0.281206 | 262 | 238 | 275 | 345 | 322 | 258 | 307 | 292 | 258  | 305      | 0.85     | 0.607821 | 309      | 0.84     | 0.146377 |
| 249673_at   | A15f35920 | cytochrome P450, putative                  | cytochrome P450, putative                  | 17  | 18  | 20  | 21  | 23  | 25  | 18  | 23   | 0.79     | 0.035852 | 14  | 13  | 16  | 12  | 13  | 12  | 15  | 14  | 14   | 13       | 1.08     | 0.314992 | 12       | 1.16     | 0.058522 |
| 249674_at   | A15f35930 | unknown protein                            | AMP-dependent synthetase and liqase f      | 158 | 200 | 203 | 211 | 255 | 201 | 187 | 222  | 0.84     | 0.188506 | 154 | 144 | 174 | 204 | 184 | 151 | 186 | 178 | 157  | 181      | 0.87     | 0.126517 | 179      | 0.88     | 0.281542 |
| 249675_at   | A15f35940 | putative protein myrosinase-binding        | putative protein myrosinase-binding        | 29  | 28  | 34  | 36  | 27  | 32  | 30  | 32   | 0.96     | 0.698018 | 29  | 30  | 35  | 28  | 27  | 23  | 26  | 25  | 31   | 26       | 1.22     | 0.015443 | 28       | 1.22     | 0.071965 |
| 249676_at   | A15f35960 | serine/threonine protein kinase-like       | protein kinase, putative                   | 36  | 31  | 42  | 46  | 48  | 35  | 36  | 43   | 0.84     | 0.241371 | 20  | 20  | 27  | 20  | 21  | 23  | 24  | 22  | 22   | 1.02     | 0.792913 | 21       | 1.08     | 0.527318 |          |
| 249677_at   | A15f35970 | DNA helicase-like                          | DNA-binding protein, putative              | 125 | 165 | 151 | 146 | 164 | 132 | 147 | 147  | 1.00     | 0.980418 | 107 | 87  | 101 | 145 | 132 | 105 | 124 | 113 | 98   | 124      | 0.80     | 0.050321 | 127      | 0.77     | 0.093320 |
| 249678_at   | A15f35980 | protein kinase-like                        | protein kinase family protein              | 239 | 297 | 273 | 350 | 372 | 248 | 270 | 323  | 0.83     | 0.287850 | 125 | 120 | 120 | 169 | 148 | 134 | 158 | 152 | 122  | 152      | 0.80     | 0.007669 | 150      | 0.81     | 0.049111 |
| 249679_at   | A15f35990 | unknown protein                            | protein kinase family protein              | 314 | 362 | 367 | 439 | 453 | 362 | 348 | 418  | 0.83     | 0.101847 | 280 | 241 | 302 | 364 | 336 | 268 | 343 | 331 | 274  | 329      | 0.84     | 0.074301 | 323      | 0.85     | 0.222454 |
| 249680_s_at | A15f36000 | putative protein strong similarity to      | putative protein strong similarity to      | 23  | 23  | 31  | 29  | 26  | 29  | 26  | 28   | 0.92     | 0.516237 | 15  | 19  | 22  | 19  | 17  | 20  | 18  | 20  | 19   | 19       | 1.01     | 0.955854 | 19       | 1.01     | 0.935086 |
| 249681_s_at | A15f36070 | putative protein strong similarity to      | putative protein strong similarity to      | 12  | 18  | 16  | 18  | 19  | 19  | 16  | 19   | 0.85     | 0.214915 | 14  | 15  | 20  | 15  | 16  | 15  | 19  | 16  | 17   | 17       | 0.95     | 0.675173 | 17       | 0.95     | 0.760963 |
| 249682_at   | A15f36080 | putative protein similar to unknown        | putative protein similar to unknown        | 16  | 11  | 16  | 13  | 12  | 11  | 14  | 12   | 1.17     | 0.262049 | 11  | 7   | 10  | 9   | 10  | 9   | 11  | 9   | 10   | 10       | 0.99     | 0.925470 | 9        | 1.00     | 0.997366 |
| 249683_x_at | A15f36090 | outative protein similar to unknown        | outative protein similar to unknown        | 8   | 12  | 9   | 6   | 10  | 9   | 10  | 8    | 1.17     | 0.458053 | 4   | 2   | 4   | 5   | 5   | 6   | 3   | 5   | 0.89 | 0.133630 | 5        | 0.67     | 0.112714 |          |          |
| 249684_s_at | A15f36110 | cytochrome P450-like                       | cytochrome P450 family protein             | 19  | 24  | 32  | 40  | 33  | 25  | 25  | 33   | 0.77     | 0.262619 | 15  | 21  | 21  | 30  | 25  | 22  | 26  | 19  | 25   | 0.76     | 0.061065 | 28       | 0.74     | 0.107977 |          |
| 249685_at   | A15f36120 | outative protein similar to unknown        | outative protein similar to unknown        | 60  | 51  | 62  | 102 | 87  | 80  | 87  | 101  | 0.82     | 0.620732 | 81  | 87  | 101 | 117 | 88  | 101 | 117 | 104 | 86   | 104      | 0.83     | 0.097171 | 89       | 0.87     | 0.246607 |
| 249686_at   | A15f36140 | putative protein contains similarity to    | putative protein contains similarity to    | 25  | 25  | 30  | 33  | 30  | 31  | 27  | 31   | 0.86     | 0.095293 | 20  | 20  | 24  | 25  | 24  | 22  | 22  | 21  | 23   | 0.93     | 0.197419 | 23       | 0.91     | 0.206685 |          |
| 249687_at   | A15f36150 | putative protein oxidoreductase            | putative protein oxidoreductase            | 21  | 23  | 23  | 29  | 24  | 25  | 26  | 25   | 0.96     | 0.764303 | 19  | 23  | 26  | 21  | 23  | 23  | 24  | 21  | 23   | 23       | 1.00     | 0.960393 | 22       | 1.02     | 0.871972 |
| 249688_at   | A15f36160 | putative protein tyrosine aminotransferase | putative protein tyrosine aminotransferase | 63  | 83  | 121 | 493 | 452 | 401 | 89  | 448  | 0.20     | 0.005043 | 200 | 237 | 283 | 749 | 595 | 477 | 576 | 604 | 240  | 600      | 0.40     | 0.001031 | 607      | 0.40     | 0.011263 |
| 249689_at   | A15f36190 | outative protein similar to unknown        | outative protein similar to unknown        | 9   | 15  | 17  | 15  | 10  | 11  | 12  | 12   | 0.91     | 0.957624 | 9   | 11  | 10  | 9   | 13  | 12  | 10  | 11  | 12   | 10       | 0.88     | 0.278491 | 11       | 0.88     | 0.367660 |
| 249690_at   | A15f36210 | acyl-peptide hydrolase-like                | expressed protein                          | 423 | 558 | 525 | 585 | 724 | 494 | 502 | 601  | 0.84     | 0.276365 | 503 | 451 | 503 | 647 | 599 | 517 | 575 | 559 | 486  | 579      | 0.84     | 0.024466 | 588      | 0.83     | 0.071577 |
| 249691_at   | A15f36210 | translation releasing factor RF-2          | translation releasing factor, putative     | 216 | 343 | 340 | 295 | 356 | 257 | 300 | 302  | 0.99     | 0.959308 | 303 | 298 | 305 | 405 | 345 | 337 | 384 | 358 | 302  | 366      | 0.83     | 0.009005 | 362      | 0.83     | 0.047763 |
| 249692_s_at | A15f36670 | putative protein strong similarity to      | putative protein strong similarity to      | 138 | 176 | 159 | 196 | 224 | 167 | 158 | 196  | 0.81     | 0.126671 | 127 | 99  | 150 | 178 | 154 | 123 | 147 | 143 | 125  | 149      | 0.84     | 0.187626 | 152      | 0.83     | 0.286578 |
| 249693_s_at | A15f36700 | N-acylserine dehydrogenase-like            | N-acylserine dehydrogenase-like            | 135 | 308 | 271 | 253 | 249 | 171 | 221 | 227  | 0.97     | 0.020965 | 181 | 205 | 207 | 355 | 222 | 253 | 222 | 202 | 198  | 251      | 0.92     | 0.19538  | 277      | 0.71     | 0.025193 |
| 249694_at   | A15f36710 | putative protein similar to unknown        | putative protein similar to unknown        | 557 | 693 | 682 | 674 | 863 | 638 | 611 | 725  | 0.84     | 0.233132 | 593 | 588 | 676 | 864 | 717 | 669 | 625 | 619 | 700  | 888      | 0.84     | 0.243278 | 750      | 0.82     | 0.114236 |
| 249660_at   | A15f36720 | outative protein similar to unknown        | outative protein similar to unknown        | 24  | 26  | 27  | 30  | 32  | 37  | 26  | 33   | 0.78     | 0.029778 | 26  | 19  | 31  | 24  | 21  | 27  | 21  | 28  | 25   | 24       | 1.05     | 0.707296 | 24       | 1.06     | 0.743204 |
| 249661_x_at | A15f36650 | outative protein similar to unknown        | outative protein similar to unknown        | 47  | 47  | 55  | 56  | 59  | 54  | 47  | 56   | 0.83     | 0.133708 | 34  | 32  | 33  | 35  | 31  | 32  | 46  | 37  | 33   | 36       | 0.91     | 0.416890 | 33       | 1.01     | 0.818555 |
| 249662_s_at | A15f36770 | outative protein hvhothetical proteins     | expressed protein                          | 44  | 53  | 48  | 60  | 58  | 52  | 48  | 57   | 0.85     | 0.063804 | 21  | 20  | 38  | 35  | 30  | 25  | 18  | 26  | 26   | 27       | 0.98     | 0.829009 | 30       | 0.88     | 0.606225 |
| 249663_s_at | A15f36727 | unknown protein                            | unknown protein                            | 25  | 31  | 34  | 35  | 34  | 31  | 34  | 35   | 0.91     | 0.456934 | 24  | 21  | 28  | 28  | 24  | 24  | 25  | 24  | 25   | 24       | 1.04     | 0.658879 | 24       | 1.00     | 0.455388 |
| 249664_at   | A15f36810 | putative protein histone stem-loop         | putative protein histone stem-loop         | 16  | 16  | 18  | 23  | 18  | 16  | 17  | 19   | 0.87     | 0.296711 | 13  | 17  | 18  | 18  | 18  | 18  | 17  | 16  | 16   | 17       | 0.92     | 0.284931 | 18       | 0.88     | 0.176219 |
| 249634_at   | A15f36840 | putative protein several hvhothetical      | putative protein several hvhothetical      | 12  | 13  | 10  | 12  | 12  | 14  | 12  | 13   | 0.91     | 0.357152 | 9   | 15  | 12  | 9   | 10  | 10  | 21  | 14  | 12   | 13       | 0.97     | 0.925373 | 9        | 1.29     | 0.187103 |
| 249635_at   | A15f36850 | outative glucan synthase                   | outative glucan synthase                   | 59  | 68  | 84  | 91  | 92  | 77  | 70  | 87   | 0.81     | 0.140979 | 59  | 62  | 70  | 59  | 49  | 55  | 57  | 56  | 64   | 55       | 1.15     | 0.051952 | 55       | 1.16     | 0.120572 |
| 249636_at   | A15f36860 | beta-glucosidase-like protein              | beta-glucosidase-like protein              | 248 | 298 | 290 | 306 | 248 | 298 | 248 | 298  | 0.98     | 0.176607 | 189 | 156 | 174 | 125 | 213 | 180 | 183 | 174 | 172  | 216      | 0.83     | 0.077329 | 216      | 0.80     | 0.096653 |
| 249637_at   | A15f36900 | hypothetical protein                       | hypothetical protein                       | 21  | 29  | 38  | 38  | 38  | 34  | 29  | 37   | 0.80     | 0.210497 | 22  | 25  | 25  | 21  | 22  | 18  | 24  | 24  | 24   | 22       | 1.09     | 0.263624 | 21       |          |          |

|             |           |                                                                                           |      |      |      |      |      |      |      |      |          |          |      |      |      |      |      |      |      |      |      |      |      |          |      |      |          |
|-------------|-----------|-------------------------------------------------------------------------------------------|------|------|------|------|------|------|------|------|----------|----------|------|------|------|------|------|------|------|------|------|------|------|----------|------|------|----------|
| 249629_at   | A15f37590 | kinesin -like protein Krm protein, L1a2c kinesin light chain-related                      | 77   | 107  | 123  | 135  | 161  | 123  | 103  | 140  | 0.73     | 0.101075 | 63   | 55   | 67   | 75   | 74   | 70   | 90   | 63   | 62   | 75   | 0.83 | 0.094360 | 73   | 0.84 | 0.040333 |
| 249602_at   | A15f37610 | porin -like protein porin, Prunus amer hypophyseal protein                                | 34   | 36   | 55   | 44   | 39   | 44   | 41   | 42   | 0.98     | 0.892594 | 28   | 23   | 33   | 22   | 24   | 25   | 45   | 31   | 28   | 29   | 0.96 | 0.849321 | 23   | 1.20 | 0.178331 |
| 249571_at   | A15f37620 | putative protein predicted proteins, Ara C2 domain-containing protein                     | 11   | 11   | 16   | 13   | 15   | 12   | 13   | 13   | 0.98     | 0.790162 | 8    | 11   | 13   | 11   | 11   | 11   | 11   | 11   | 11   | 11   | 1.02 | 0.880622 | 11   | 0.98 | 0.897518 |
| 249572_at   | A15f37630 | chromatin condensation protein, lkb chromatin condensation family protein                 | 30   | 45   | 83   | 97   | 107  | 103  | 60   | 60   | 0.59     | 0.036127 | 41   | 51   | 46   | 93   | 74   | 74   | 63   | 58   | 46   | 72   | 0.94 | 0.704390 | 64   | 0.95 | 0.376904 |
| 249573_at   | A15f37640 | ubiquitin-like protein (UBQ9), putative polyubiquitin (UBQ9)                              | 42   | 48   | 65   | 62   | 68   | 67   | 52   | 66   | 0.79     | 0.123703 | 39   | 45   | 45   | 50   | 45   | 45   | 48   | 51   | 43   | 48   | 0.91 | 0.086986 | 46   | 0.93 | 0.262532 |
| 249574_at   | A15f37660 | putative protein embryonic abundant p receptor-like protein kinase-related                | 38   | 37   | 46   | 51   | 61   | 54   | 40   | 55   | 0.73     | 0.020834 | 45   | 58   | 54   | 55   | 49   | 45   | 54   | 51   | 52   | 51   | 1.03 | 0.177536 | 50   | 1.05 | 0.620138 |
| 249575_at   | A15f37670 | low-molecular-weight heat shock protein 15.7 kDa class I-related small heat shock         | 25   | 29   | 39   | 43   | 53   | 44   | 31   | 47   | 0.67     | 0.043322 | 25   | 21   | 22   | 25   | 18   | 20   | 29   | 25   | 23   | 23   | 0.97 | 0.814978 | 21   | 1.09 | 0.484407 |
| 249576_at   | A15f37690 | putative protein predicted proteins, Ara C2C5, non-15S leucine-rich repeat                | 39   | 54   | 57   | 63   | 60   | 56   | 50   | 61   | 0.82     | 0.155040 | 39   | 35   | 36   | 33   | 34   | 35   | 33   | 35   | 33   | 33   | 0.95 | 0.503703 | 33   | 0.93 | 0.396904 |
| 249577_at   | A15f37710 | calmodulin-binding heat-shock protein, lasease class 3 family protein / calmodulin        | 145  | 203  | 187  | 159  | 194  | 147  | 178  | 167  | 1.07     | 0.638988 | 136  | 108  | 134  | 145  | 127  | 115  | 151  | 131  | 126  | 134  | 0.94 | 0.496615 | 129  | 0.98 | 0.823061 |
| 249578_at   | A15f37730 | putative protein predicted proteins, AraC expressed protein                               | 18   | 15   | 23   | 17   | 19   | 17   | 19   | 18   | 1.05     | 0.737554 | 17   | 11   | 18   | 16   | 13   | 20   | 20   | 15   | 17   | 17   | 0.89 | 0.451660 | 15   | 1.00 | 0.984644 |
| 249579_at   | A15f37680 | ADP-ribosylation factor - like protein AI ADP-ribosylation factor, putative               | 166  | 219  | 238  | 281  | 311  | 253  | 207  | 282  | 0.74     | 0.053826 | 216  | 238  | 257  | 404  | 292  | 267  | 300  | 268  | 237  | 306  | 0.77 | 0.093601 | 321  | 0.74 | 0.127392 |
| 249580_at   | A15f37690 | putative protein predicted proteins, Ara C2 domain-containing protein                     | 35   | 40   | 42   | 75   | 63   | 60   | 39   | 66   | 0.59     | 0.036127 | 41   | 51   | 46   | 93   | 74   | 74   | 63   | 58   | 46   | 72   | 0.94 | 0.018606 | 80   | 0.57 | 0.077222 |
| 249581_at   | A15f37690 | glutamate-ammonia ligase - supporter glutamine synthetase, putative                       | 91   | 137  | 115  | 164  | 121  | 112  | 114  | 132  | 0.86     | 0.433442 | 102  | 104  | 112  | 133  | 112  | 124  | 108  | 106  | 119  | 119  | 0.89 | 0.083342 | 122  | 0.87 | 0.096407 |
| 249582_at   | A15f37780 | calmodulin 1 (CAM1) ; supported by c1 calmodulin-1/4 (CAM1)                               | 1875 | 2306 | 2508 | 2774 | 3175 | 2588 | 2230 | 2845 | 0.78     | 0.072898 | 2718 | 2689 | 2634 | 3261 | 2716 | 2730 | 2998 | 3003 | 2674 | 2942 | 0.91 | 0.096510 | 2902 | 0.92 | 0.275491 |
| 249583_at   | A15f37770 | CALMODULIN-RELATED PROTEIN 2 touch-responsive protein / calmodulin-re                     | 1168 | 914  | 1351 | 1552 | 1580 | 1263 | 1145 | 1465 | 0.78     | 0.119639 | 662  | 725  | 703  | 1042 | 671  | 698  | 816  | 803  | 697  | 806  | 0.86 | 0.261962 | 804  | 0.87 | 0.425990 |
| 249584_s_at | A15f37810 | Membrane integral protein (MIP) -like I major intrinsic family protein / MIP famih        | 18   | 22   | 24   | 22   | 24   | 24   | 21   | 23   | 0.92     | 0.368959 | 20   | 21   | 17   | 20   | 15   | 18   | 17   | 18   | 19   | 18   | 1.08 | 0.341926 | 18   | 1.08 | 0.479283 |
| 249585_at   | A15f37830 | putative protein predicted proteins, Ara C2 domain-containing protein                     | 88   | 95   | 110  | 142  | 141  | 99   | 98   | 127  | 0.77     | 0.130479 | 82   | 68   | 79   | 115  | 87   | 78   | 90   | 84   | 77   | 91   | 0.84 | 0.168999 | 94   | 0.82 | 0.231634 |
| 249586_at   | A15f37840 | putative protein predicted proteins, AraC expressed protein                               | 29   | 38   | 25   | 43   | 40   | 37   | 42   | 0.88 | 0.378956 | 23       | 25   | 32   | 29   | 22   | 24   | 32   | 29   | 27   | 27   | 27   | 0.88 | 0.892623 | 25   | 1.07 | 0.626069 |
| 249587_at   | A15f37860 | putative protein copper homeostasis fa copper-binding family protein                      | 29   | 28   | 32   | 31   | 31   | 32   | 30   | 31   | 0.95     | 0.340467 | 21   | 21   | 29   | 21   | 29   | 22   | 22   | 22   | 22   | 21   | 1.06 | 0.681888 | 20   | 1.09 | 0.623339 |
| 249588_at   | A15f37790 | protein kinase - like protein Pto kinase protein kinase family protein                    | 81   | 127  | 112  | 132  | 193  | 192  | 155  | 107  | 0.59     | 0.015684 | 125  | 101  | 145  | 156  | 128  | 99   | 124  | 113  | 123  | 124  | 1.00 | 0.971351 | 128  | 0.97 | 0.851633 |
| 249589_at   | A15f37850 | pyridoxal kinase -like protein pyridoxal pyridoxal pyridoxal kinase family on             | 102  | 145  | 137  | 151  | 126  | 131  | 138  | 0.95 | 0.664532 | 150      | 183  | 169  | 175  | 155  | 167  | 177  | 177  | 177  | 177  | 177  | 0.94 | 0.626726 | 167  | 0.90 | 0.468014 |
| 249590_at   | A15f37870 | putative protein S1AH1, Brassica napus seven in absentia (SINA) family protein            | 50   | 47   | 74   | 65   | 63   | 73   | 57   | 67   | 0.85     | 0.338319 | 29   | 37   | 55   | 44   | 35   | 37   | 43   | 39   | 40   | 40   | 1.02 | 0.900921 | 39   | 1.04 | 0.853101 |
| 249591_at   | A15f37880 | putative protein predicted proteins, AraC expressed protein                               | 21   | 26   | 26   | 34   | 37   | 35   | 24   | 35   | 0.69     | 0.004402 | 21   | 16   | 20   | 21   | 22   | 20   | 21   | 18   | 19   | 20   | 0.93 | 0.328784 | 21   | 0.91 | 0.247851 |
| 249592_at   | A15f37890 | putative protein S1AH1 protein, Brassic seven in absentia (SINA) protein, outatv          | 211  | 239  | 260  | 318  | 355  | 262  | 237  | 312  | 0.77     | 0.071155 | 269  | 293  | 313  | 495  | 372  | 345  | 324  | 286  | 292  | 364  | 0.80 | 0.184615 | 404  | 0.72 | 0.079468 |
| 249593_at   | A15f37900 | putative protein S1AH1 protein, Brassic seven in absentia (SINA) protein, outatv          | 14   | 14   | 17   | 17   | 19   | 17   | 16   | 18   | 0.93     | 0.649054 | 20   | 21   | 20   | 19   | 13   | 16   | 20   | 16   | 20   | 17   | 1.22 | 0.079894 | 16   | 1.28 | 0.053018 |
| 249594_at   | A15f37910 | putative protein S1AH1 protein, Brassic seven in absentia (SINA) family protein           | 17   | 15   | 16   | 15   | 16   | 14   | 16   | 15   | 1.07     | 0.385413 | 11   | 14   | 17   | 12   | 10   | 13   | 14   | 13   | 14   | 12   | 1.13 | 0.348119 | 12   | 1.18 | 0.361540 |
| 249595_at   | A15f37930 | putative protein S1AH1 protein, Brassic seven in absentia (SINA) family protein           | 221  | 346  | 345  | 355  | 388  | 316  | 304  | 353  | 0.86     | 0.348416 | 336  | 356  | 344  | 551  | 377  | 395  | 402  | 409  | 345  | 427  | 0.81 | 0.100378 | 441  | 0.78 | 0.158976 |
| 249596_s_at | A15f37950 | glucuronosyl transferase-like protein o1 glucuronosyl transferase / glucuronosyl          | 4    | 4    | 5    | 5    | 7    | 4    | 6    | 0.79 | 0.232362 | 5        | 5    | 4    | 4    | 5    | 8    | 7    | 4    | 5    | 5    | 6    | 0.81 | 0.392178 | 6    | 0.83 | 0.504221 |
| 249597_at   | A15f37960 | putative protein probable oxunone oxidoreductase-related                                  | 13   | 11   | 9    | 5    | 12   | 13   | 11   | 10   | 1.06     | 0.827004 | 12   | 9    | 24   | 13   | 11   | 9    | 21   | 9    | 15   | 13   | 1.19 | 0.607193 | 11   | 1.37 | 0.438409 |
| 249598_at   | A15f37970 | putative protein APP protein, Brassica S-adenosyl-L-methionine:carboxyl methy             | 8    | 6    | 7    | 7    | 6    | 8    | 7    | 8    | 0.85     | 0.294479 | 6    | 6    | 7    | 6    | 7    | 6    | 7    | 6    | 7    | 6    | 1.10 | 0.448893 | 6    | 1.21 | 0.706062 |
| 249599_at   | A15f37990 | putative protein APP protein, Brassica S-adenosyl-L-methionine:carboxyl methy             | 18   | 17   | 27   | 23   | 29   | 23   | 21   | 25   | 0.83     | 0.311892 | 11   | 13   | 17   | 16   | 12   | 12   | 17   | 18   | 14   | 15   | 0.92 | 0.583008 | 13   | 1.04 | 0.835242 |
| 249600_s_at | A15f38000 | oxidoreductase-like protein zeta-crysta NADP-dependent oxidoreductase, putat              | 6    | 7    | 10   | 10   | 8    | 6    | 8    | 0.95 | 0.806130 | 5        | 7    | 11   | 10   | 7    | 6    | 13   | 9    | 8    | 9    | 9    | 0.84 | 0.491892 | 8    | 0.97 | 0.903424 |
| 249601_at   | A15f37980 | quinone oxidoreductase-like protein p NADP-dependent oxidoreductase, putat                | 44   | 68   | 88   | 84   | 81   | 85   | 67   | 84   | 0.80     | 0.253356 | 42   | 55   | 55   | 66   | 46   | 53   | 60   | 58   | 51   | 56   | 0.90 | 0.345981 | 55   | 0.92 | 0.603446 |
| 249602_at   | A15f38000 | SAMT-like protein S-adenosyl-L-methi S-adenosyl-L-methionine:carboxyl methy               | 29   | 31   | 44   | 38   | 33   | 43   | 34   | 38   | 0.91     | 0.544436 | 24   | 26   | 36   | 33   | 29   | 27   | 30   | 28   | 28   | 29   | 0.96 | 0.177893 | 30   | 0.95 | 0.706062 |
| 249603_at   | A15f38040 | glucosyltransferase-like protein UDP-G UDP-glucuronosylUDP-glucosyl transfe               | 34   | 34   | 41   | 46   | 54   | 41   | 36   | 47   | 0.77     | 0.071094 | 28   | 24   | 31   | 39   | 36   | 30   | 34   | 31   | 28   | 34   | 0.81 | 0.046053 | 35   | 0.79 | 0.080993 |
| 249604_at   | A15f38070 | putative protein Pfl1 - Arabidopsis thali zinc finger (C3HC4-type RING finger) fa         | 62   | 74   | 75   | 69   | 94   | 72   | 70   | 78   | 0.90     | 0.414034 | 75   | 64   | 71   | 89   | 74   | 80   | 84   | 83   | 70   | 82   | 0.85 | 0.023099 | 81   | 0.86 | 0.104847 |
| 249605_at   | A15f38080 | hypothetical protein                                                                      | 29   | 33   | 41   | 40   | 35   | 37   | 34   | 38   | 0.91     | 0.417057 | 38   | 33   | 53   | 34   | 27   | 36   | 47   | 39   | 41   | 37   | 1.13 | 0.458248 | 33   | 1.27 | 0.245668 |
| 249606_at   | A15f38100 | putative protein APP - Brassica napus methyltransferase-related                           | 21   | 27   | 28   | 30   | 32   | 36   | 26   | 33   | 0.79     | 0.030137 | 22   | 27   | 29   | 28   | 26   | 32   | 34   | 26   | 27   | 26   | 0.96 | 0.403524 | 27   | 0.97 | 0.144627 |
| 249607_at   | A15f38120 | 4-coumarate-CoA ligase -like protein - 4-coumarate-CoA ligase family protein              | 43   | 46   | 53   | 40   | 118  | 118  | 47   | 110  | 0.43     | 0.001700 | 43   | 48   | 53   | 134  | 115  | 88   | 122  | 106  | 48   | 113  | 0.42 | 0.000802 | 112  | 0.43 | 0.008948 |
| 249608_at   | A15f38130 | anthranilate N-benzoyltransferase -like transferase family protein                        | 25   | 21   | 23   | 35   | 36   | 34   | 26   | 35   | 0.75     | 0.064569 | 16   | 19   | 22   | 20   | 19   | 20   | 19   | 20   | 19   | 21   | 0.94 | 0.536591 | 20   | 0.98 | 0.833929 |
| 249609_at   | A15f38140 | translational protein transcription factor Hb histone-like transcription factor (CBF/NF   | 141  | 240  | 215  | 190  | 256  | 177  | 199  | 207  | 0.96     | 0.028903 | 185  | 152  | 182  | 220  | 191  | 258  | 204  | 191  | 173  | 193  | 0.90 | 0.251677 | 190  | 0.91 | 0.466194 |
| 249610_at   | A15f38035 | Excessed protein - supported by full-lke cyp1-like retrotransposon family                 | 54   | 67   | 102  | 80   | 122  | 87   | 75   | 96   | 0.78     | 0.328737 | 45   | 48   | 58   | 39   | 42   | 52   | 45   | 44   | 40   | 40   | 1.09 | 0.554189 | 34   | 1.28 | 0.083335 |
| 249611_at   | A15f38110 | anti-silencing factor 1-like protein S-loc ASF-1-like anti-silencing family protein       | 304  | 428  | 397  | 382  | 467  | 146  | 173  | 404  | 0.83     | 0.086920 | 322  | 352  | 356  | 446  | 361  | 360  | 346  | 313  | 343  | 361  | 0.95 | 0.570765 | 386  | 0.89 | 0.256637 |
| 249612_at   | A15f38030 | putative transmembrane protein putative MATE efflux family protein                        | 10   | 13   | 18   | 19   | 14   | 16   | 13   | 17   | 0.81     | 0.308353 | 13   | 8    | 12   | 12   | 12   | 12   | 8    | 17   | 7    | 11   | 0.99 | 0.973173 | 11   | 1.05 | 0.796120 |
| 249613_at   | A15f38150 | putative protein chromosome sequeat expressed protein                                     | 53   | 69   | 47   | 69   | 76   | 61   | 56   | 68   | 0.82     | 0.201680 | 40   | 37   | 37   | 52   | 48   | 36   | 58   | 53   | 38   | 49   | 0.77 | 0.059313 | 45   | 0.84 | 0.202333 |
| 249614_at   | A15f38160 | lido transfer - like protein P48h-10 oro lido transfer - like protein P48h-10 crot        | 28   | 27   | 40   | 34   | 31   | 35   | 32   | 33   | 0.95     | 0.279689 | 23   | 22   | 27   | 31   | 20   | 25   | 26   | 26   | 24   | 25   | 0.95 | 0.639751 | 25   | 0.95 | 0.749204 |
| 249615_at   | A15f38170 | lido transfer - like protein lido transfer protein, lasease-related storage/lido tran     | 16   | 17   | 16   | 13   | 16   | 13   | 10   | 13   | 0.82     | 0.295167 | 14   | 13   | 12   | 16   | 12   | 12   | 16   | 12   | 12   | 12   | 0.91 | 0.405683 | 34   | 0.90 | 0.517840 |
| 249616_at   | A15f38180 | lido transfer - like protein lido transfer / lido transfer - like protein lido transfer I | 19   | 25   | 27   | 25   | 25   | 29   | 24   | 26   | 0.90     | 0.377810 | 22   | 24   | 28   | 32   | 24   | 27   | 26   | 25   | 27   | 26   | 1.04 | 0.419846 | 28   | 0.92 | 0.458764 |
| 249617_at   | A15f38210 | protein kinase - like protein wall-associ serine/threonine                                |      |      |      |      |      |      |      |      |          |          |      |      |      |      |      |      |      |      |      |      |      |          |      |      |          |

|             |           |                                  |                                  |     |     |       |      |      |      |     |      |          |          |     |     |      |      |      |      |      |      |     |      |          |          |      |          |          |
|-------------|-----------|----------------------------------|----------------------------------|-----|-----|-------|------|------|------|-----|------|----------|----------|-----|-----|------|------|------|------|------|------|-----|------|----------|----------|------|----------|----------|
| 249505_at   | A15f38870 | putative protein                 | pseudogene, hypothetical protein | 69  | 73  | 123   | 98   | 95   | 106  | 88  | 100  | 0.88     | 0.550192 | 27  | 33  | 41   | 37   | 30   | 36   | 49   | 39   | 34  | 38   | 0.88     | 0.411943 | 34   | 0.99     | 0.927391 |
| 249506_at   | A15f38880 | putative protein                 | expressed protein                | 176 | 222 | 226   | 245  | 251  | 202  | 208 | 233  | 0.89     | 0.332947 | 170 | 136 | 180  | 221  | 184  | 155  | 208  | 188  | 162 | 191  | 0.85     | 0.153513 | 187  | 0.87     | 0.349157 |
| 249475_at   | A15f38890 | oatative protein CG1-108 protein | hem x exonuclease-related        | 324 | 360 | 432   | 482  | 522  | 453  | 372 | 486  | 0.77     | 0.039598 | 318 | 409 | 434  | 597  | 456  | 402  | 399  | 396  | 387 | 450  | 0.86     | 0.311912 | 485  | 0.80     | 0.221686 |
| 249476_at   | A15f38900 | oatative protein                 | oatative protein                 | 43  | 43  | 36    | 43   | 47   | 40   | 38  | 43   | 0.86     | 0.133059 | 33  | 38  | 36   | 37   | 35   | 28   | 35   | 35   | 28  | 103  | 0.727918 | 86       | 1.03 | 0.281171 |          |
| 249477_s_at | A15f38930 | oatative protein                 | oatative protein                 | 4   | 5   | 6     | 5    | 3    | 8    | 5   | 6    | 0.87     | 0.077332 | 2   | 5   | 5    | 6    | 3    | 7    | 6    | 4    | 7   | 6    | 0.76     | 0.251937 | 5    | 0.85     | 0.500852 |
| 249478_at   | A15f38950 | oatative protein                 | oatative protein                 | 15  | 15  | 15    | 18   | 21   | 20   | 15  | 20   | 0.76     | 0.005531 | 10  | 12  | 16   | 15   | 14   | 13   | 13   | 16   | 13  | 14   | 0.90     | 0.320733 | 14   | 0.91     | 0.500376 |
| 249479_at   | A15f38960 | oatative protein                 | oatative protein                 | 15  | 17  | 22    | 18   | 20   | 18   | 18  | 19   | 0.96     | 0.789641 | 16  | 12  | 20   | 17   | 16   | 14   | 17   | 13   | 16  | 15   | 1.04     | 0.744139 | 15   | 1.04     | 0.831413 |
| 249480_s_at | A15f38990 | oatative protein                 | oatative protein                 | 95  | 118 | 125   | 125  | 121  | 116  | 112 | 121  | 0.93     | 0.444188 | 85  | 116 | 123  | 103  | 106  | 114  | 127  | 120  | 95  | 114  | 0.87     | 0.135535 | 110  | 0.85     | 0.050345 |
| 249481_s_at | A15f38900 | oatative protein                 | oatative protein                 | 9   | 13  | 11    | 15   | 14   | 13   | 11  | 14   | 0.81     | 0.116676 | 13  | 14  | 16   | 15   | 10   | 12   | 13   | 11   | 14  | 12   | 1.20     | 0.128111 | 12   | 1.20     | 0.242781 |
| 249482_at   | A15f38980 | oatative protein                 | oatative protein                 | 205 | 278 | 267   | 334  | 337  | 255  | 250 | 309  | 0.81     | 0.169803 | 189 | 221 | 247  | 538  | 356  | 361  | 360  | 339  | 219 | 391  | 0.56     | 0.014748 | 418  | 0.52     | 0.032556 |
| 249483_at   | A15f38895 | oatative protein                 | oatative protein                 | 68  | 114 | 121   | 125  | 135  | 102  | 101 | 121  | 0.83     | 0.361923 | 90  | 91  | 91   | 132  | 109  | 103  | 110  | 111  | 91  | 113  | 0.80     | 0.015597 | 114  | 0.79     | 0.065631 |
| 249484_at   | A15f38970 | oatative protein                 | oatative protein                 | 69  | 103 | 127   | 142  | 145  | 126  | 100 | 138  | 0.72     | 0.095196 | 124 | 119 | 133  | 195  | 146  | 145  | 121  | 131  | 125 | 148  | 0.85     | 0.236012 | 162  | 0.77     | 0.095109 |
| 249485_at   | A15f39020 | oatative protein                 | oatative protein                 | 17  | 22  | 25    | 21   | 25   | 24   | 22  | 23   | 0.93     | 0.420286 | 17  | 15  | 19   | 17   | 14   | 15   | 19   | 17   | 17  | 104  | 0.702851 | 15       | 1.13 | 0.254205 |          |
| 249486_at   | A15f39030 | oatative protein                 | oatative protein                 | 48  | 43  | 55    | 46   | 46   | 50   | 46  | 50   | 0.86     | 0.846743 | 25  | 35  | 42   | 31   | 26   | 29   | 36   | 47   | 34  | 34   | 0.99     | 0.965731 | 29   | 1.17     | 0.393150 |
| 249487_at   | A15f39040 | oatative protein                 | oatative protein                 | 292 | 358 | 376   | 383  | 485  | 330  | 342 | 399  | 0.86     | 0.333902 | 286 | 207 | 268  | 332  | 323  | 247  | 319  | 310  | 253 | 306  | 0.83     | 0.094752 | 301  | 0.84     | 0.257286 |
| 249488_at   | A15f39070 | oatative protein                 | oatative protein                 | 23  | 30  | 28    | 28   | 27   | 26   | 27  | 27   | 0.98     | 0.851831 | 24  | 27  | 32   | 22   | 25   | 31   | 26   | 27   | 28  | 26   | 1.06     | 0.542106 | 26   | 1.06     | 0.641001 |
| 249489_at   | A15f39090 | oatative protein                 | oatative protein                 | 75  | 102 | 133   | 116  | 154  | 126  | 103 | 132  | 0.78     | 0.227481 | 58  | 69  | 68   | 74   | 60   | 60   | 62   | 75   | 60  | 82   | 0.91     | 0.397646 | 65   | 0.99     | 0.990347 |
| 249490_s_at | A15f39110 | oatative protein                 | oatative protein                 | 31  | 39  | 49    | 41   | 43   | 45   | 40  | 43   | 0.92     | 0.585900 | 31  | 31  | 42   | 31   | 32   | 31   | 32   | 32   | 35  | 32   | 1.09     | 0.308337 | 32   | 1.10     | 0.421448 |
| 249491_at   | A15f39130 | oatative protein                 | oatative protein                 | 2   | 2   | 0     | 1    | 1    | 0    | 1   | 1    | 2.34     | 0.317043 | 4   | 4   | 1    | 1    | 3    | 1    | 3    | 1    | 3   | 2    | 1.82     | 0.143088 | 1    | 1.99     | 0.207784 |
| 249492_at   | A15f39160 | oatative protein                 | oatative protein                 | 8   | 4   | 13    | 11   | 12   | 10   | 8   | 11   | 0.76     | 0.384706 | 5   | 12  | 8    | 7    | 5    | 5    | 5    | 8    | 6   | 1.35 | 0.242147 | 7        | 1.24 | 0.496748 |          |
| 249493_at   | A15f39080 | oatative protein                 | oatative protein                 | 86  | 88  | 102   | 100  | 100  | 92   | 92  | 97   | 0.95     | 0.400286 | 45  | 41  | 45   | 87   | 62   | 59   | 68   | 67   | 44  | 68   | 0.64     | 0.008722 | 69   | 0.63     | 0.045235 |
| 249494_at   | A15f39050 | oatative protein                 | oatative protein                 | 68  | 92  | 101   | 85   | 103  | 65   | 87  | 84   | 1.03     | 0.852975 | 40  | 46  | 41   | 81   | 61   | 54   | 80   | 70   | 43  | 69   | 0.61     | 0.010160 | 65   | 0.65     | 0.053540 |
| 249495_at   | A15f39100 | oatative protein                 | oatative protein                 | 23  | 32  | 38    | 34   | 33   | 40   | 31  | 35   | 0.88     | 0.446661 | 20  | 27  | 26   | 23   | 22   | 25   | 21   | 24   | 22  | 1.08 | 0.398470 | 22       | 1.11 | 0.386967 |          |
| 249496_s_at | A15f39200 | oatative protein                 | oatative protein                 | 14  | 9   | 17    | 12   | 13   | 12   | 13  | 13   | 1.05     | 0.794097 | 9   | 9   | 9    | 7    | 7    | 10   | 9    | 9    | 8   | 1.06 | 0.594324 | 7        | 1.21 | 0.000124 |          |
| 249497_at   | A15f39220 | oatative protein                 | oatative protein                 | 845 | 606 | 790   | 1284 | 1210 | 1221 | 747 | 1238 | 0.60     | 0.002931 | 941 | 930 | 1056 | 1636 | 1337 | 1124 | 1321 | 1278 | 975 | 1339 | 0.73     | 0.019276 | 1366 | 0.71     | 0.064002 |
| 249498_at   | A15f39230 | oatative protein                 | oatative protein                 | 16  | 17  | 26    | 25   | 21   | 25   | 19  | 24   | 0.81     | 0.277165 | 20  | 22  | 21   | 21   | 20   | 16   | 21   | 16   | 21  | 19   | 1.13     | 0.173849 | 19   | 1.12     | 0.233948 |
| 249499_at   | A15f39250 | oatative protein                 | oatative protein                 | 117 | 157 | 187   | 186  | 201  | 171  | 154 | 186  | 0.83     | 0.218650 | 116 | 127 | 129  | 164  | 122  | 136  | 140  | 125  | 124 | 137  | 0.90     | 0.234627 | 141  | 0.88     | 0.265333 |
| 249500_at   | A15f39260 | oatative protein                 | oatative protein                 | 27  | 31  | 38    | 38   | 38   | 40   | 32  | 39   | 0.82     | 0.097386 | 27  | 33  | 37   | 29   | 26   | 29   | 36   | 23   | 32  | 29   | 1.13     | 0.306456 | 28   | 1.14     | 0.276212 |
| 249501_s_at | A15f39270 | oatative protein                 | oatative protein                 | 29  | 30  | 38    | 33   | 41   | 37   | 33  | 37   | 0.88     | 0.284518 | 28  | 30  | 33   | 30   | 25   | 26   | 27   | 24   | 30  | 27   | 1.15     | 0.077429 | 27   | 1.13     | 0.216207 |
| 249502_s_at | A15f39280 | oatative protein                 | oatative protein                 | 11  | 11  | 16    | 14   | 16   | 14   | 11  | 16   | 0.89     | 0.458224 | 18  | 19  | 19   | 11   | 10   | 8    | 9    | 15   | 10  | 17   | 0.96     | 0.004981 | 9    | 0.98     | 0.000818 |
| 249503_at   | A15f39310 | oatative protein                 | oatative protein                 | 28  | 39  | 35    | 39   | 38   | 27   | 34  | 35   | 0.97     | 0.833046 | 22  | 17  | 29   | 24   | 20   | 26   | 22   | 21   | 23  | 23   | 1.01     | 0.939202 | 23   | 0.98     | 0.920089 |
| 249499_at   | A15f39320 | oatative protein                 | oatative protein                 | 89  | 109 | 221   | 256  | 252  | 209  | 198 | 239  | 0.83     | 0.096444 | 153 | 142 | 164  | 200  | 162  | 135  | 158  | 143  | 153 | 159  | 0.96     | 0.690303 | 165  | 0.92     | 0.558611 |
| 249470_at   | A15f39350 | oatative protein                 | oatative protein                 | 69  | 100 | 114   | 127  | 132  | 107  | 95  | 122  | 0.77     | 0.143119 | 84  | 76  | 83   | 106  | 88   | 83   | 95   | 85   | 81  | 92   | 0.88     | 0.131073 | 93   | 0.87     | 0.200519 |
| 249471_at   | A15f39360 | oatative protein                 | oatative protein                 | 130 | 176 | 214   | 196  | 176  | 157  | 192 | 182  | 0.82     | 0.154400 | 154 | 181 | 183  | 302  | 202  | 193  | 239  | 218  | 172 | 231  | 0.75     | 0.069731 | 232  | 0.74     | 0.117070 |
| 249472_at   | A15f39210 | oatative protein                 | oatative protein                 | 32  | 70  | 53    | 45   | 44   | 43   | 52  | 44   | 1.18     | 0.511262 | 37  | 31  | 44   | 42   | 31   | 39   | 47   | 38   | 37  | 40   | 0.94     | 0.631947 | 37   | 1.00     | 0.990072 |
| 249473_at   | A15f39340 | oatative protein                 | oatative protein                 | 235 | 312 | 352   | 340  | 390  | 290  | 300 | 340  | 0.88     | 0.421607 | 224 | 285 | 264  | 388  | 270  | 279  | 266  | 272  | 258 | 293  | 0.87     | 0.310184 | 312  | 0.83     | 0.264303 |
| 249474_s_at | A15f39190 | oatative protein                 | oatative protein                 | 10  | 12  | 21    | 11   | 10   | 14   | 14  | 14   | 1.22     | 0.500732 | 86  | 101 | 110  | 116  | 13   | 15   | 11   | 9    | 99  | 13   | 7.65     | 0.000004 | 15   | 6.73     | 0.000303 |
| 249444_at   | A15f39370 | oatative protein                 | oatative protein                 | 145 | 175 | 18    | 18   | 23   | 21   | 17  | 21   | 0.81     | 0.126355 | 18  | 15  | 17   | 14   | 19   | 15   | 14   | 15   | 14  | 15   | 1.11     | 0.310961 | 9    | 1.08     | 0.601563 |
| 249453_at   | A15f39380 | oatative protein                 | oatative protein                 | 119 | 162 | 188   | 177  | 185  | 142  | 156 | 168  | 0.93     | 0.659005 | 98  | 77  | 104  | 130  | 100  | 98   | 142  | 120  | 93  | 118  | 0.79     | 0.102738 | 109  | 0.85     | 0.292143 |
| 249446_at   | A15f39390 | oatative protein                 | oatative protein                 | 37  | 51  | 57    | 53   | 56   | 48   | 55  | 0.88 | 0.443859 | 29       | 36  | 50  | 33   | 29   | 36   | 41   | 43   | 38   | 36  | 1.06 | 0.730328 | 33       | 1.18 | 0.412456 |          |
| 249447_at   | A15f39400 | oatative protein                 | oatative protein                 | 27  | 27  | 39    | 34   | 35   | 31   | 32  | 33   | 0.95     | 0.670251 | 23  | 25  | 27   | 23   | 25   | 23   | 24   | 20   | 25  | 21   | 1.19     | 0.111104 | 20   | 1.23     | 0.161575 |
| 249448_at   | A15f39420 | oatative protein                 | oatative protein                 | 37  | 38  | 59    | 41   | 42   | 43   | 45  | 42   | 1.06     | 0.737079 | 17  | 25  | 26   | 25   | 15   | 20   | 30   | 21   | 23  | 22   | 1.02     | 0.905733 | 20   | 1.13     | 0.550262 |
| 249449_at   | A15f39430 | oatative protein                 | oatative protein                 | 35  | 46  | 51    | 39   | 45   | 38   | 44  | 53   | 0.81     | 0.472686 | 28  | 34  | 45   | 42   | 40   | 35   | 44   | 29   | 40  | 35   | 0.88     | 0.433793 | 35   | 0.98     | 0.929639 |
| 249450_at   | A15f39440 | oatative protein                 | oatative protein                 | 30  | 28  | 51    | 36   | 36   | 43   | 36  | 39   | 0.94     | 0.771448 | 17  | 15  | 20   | 21   | 17   | 14   | 20   | 19   | 17  | 18   | 0.96     | 0.724069 | 17   | 1.00     | 0.979878 |
| 249451_s_at | A15f39490 | oatative protein                 | oatative protein                 | 3   | 4   | 5     | 6    | 5    | 4    | 5   | 5    | 0.84     | 0.444861 | 3   | 3   | 5    | 3    | 4    | 4    | 8    | 2    | 4   | 4    | 0.88     | 0.754364 | 3    | 1.07     | 0.783045 |
| 249452_at   | A15f39500 | oatative protein                 | oatative protein                 | 143 | 171 | 175   | 213  | 229  | 174  | 163 | 205  | 0.79     | 0.091197 | 101 | 86  | 107  | 109  | 110  | 92   | 112  | 109  | 98  | 106  | 0.92     | 0.296888 | 104  | 0.95     | 0.548377 |
| 249453_at   | A15f39510 | oatative protein                 | oatative protein                 | 606 | 745 | 814   | 978  | 745  | 842  | 845 | 948  | 0.82     | 0.458240 | 933 | 759 | 897  | 1045 | 976  | 1045 | 987  | 1065 | 926 | 1086 | 0.87     | 0.096858 | 1086 | 0.84     | 0.038713 |
| 249454_at   | A15f39520 | oatative protein                 | oatative protein                 | 43  | 57  | 74    | 86   | 81   | 61   | 58  | 76   | 0.77     | 0.210740 | 42  | 47  | 44   | 43   | 60   | 51   | 54   | 52   | 44  | 52   | 0.85     | 0.096248 | 51   | 0.86     | 0.250557 |
| 249455_s_at | A15f39540 | oatative protein                 | oatative protein                 | 8   | 8   | 10    | 8    | 12   | 8    | 9   | 9    | 0.96     | 0.832889 | 8   | 9   | 6    | 11   | 9    | 6    | 10   | 8    | 8   | 9    | 0.87     | 0.364604 | 9    | 0.88     | 0.533833 |
| 249456_at   | A15f39410 | oatative protein                 | oatative protein                 | 325 | 385 | 404</ |      |      |      |     |      |          |          |     |     |      |      |      |      |      |      |     |      |          |          |      |          |          |

|           |           |                                                                                    |     |     |     |     |      |     |     |      |          |          |     |     |     |     |     |     |     |     |     |      |          |          |      |          |          |
|-----------|-----------|------------------------------------------------------------------------------------|-----|-----|-----|-----|------|-----|-----|------|----------|----------|-----|-----|-----|-----|-----|-----|-----|-----|-----|------|----------|----------|------|----------|----------|
| 243986_at | A15g40060 | disease resistance -like protein downy disease resistance protein (TIR-NBS-LR      | 31  | 40  | 41  | 43  | 48   | 35  | 37  | 42   | 0.89     | 0.367210 | 34  | 31  | 38  | 44  | 30  | 35  | 39  | 37  | 34  | 37   | 0.93     | 0.489797 | 36   | 0.95     | 0.717462 |
| 243987_at | A15g40070 | putative protein predicted proteins, Arz hypothetical protein                      | 17  | 16  | 27  | 22  | 27   | 24  | 20  | 24   | 0.83     | 0.316671 | 20  | 25  | 27  | 23  | 21  | 22  | 24  | 21  | 24  | 22   | 1.07     | 0.347552 | 22   | 1.09     | 0.397189 |
| 243988_at | A15g40090 | outative protein down mildew resistant disease resistance protein-related          | 72  | 78  | 98  | 104 | 114  | 92  | 83  | 104  | 0.80     | 0.112440 | 84  | 73  | 79  | 80  | 73  | 72  | 88  | 80  | 72  | 79   | 0.92     | 0.234135 | 75   | 0.96     | 0.581239 |
| 243989_at | A15g40100 | disease resistance -like protein downy disease resistance protein (TIR-NBS-LR      | 70  | 78  | 98  | 104 | 114  | 92  | 83  | 104  | 0.80     | 0.112440 | 84  | 73  | 79  | 80  | 73  | 72  | 88  | 80  | 72  | 79   | 0.92     | 0.234135 | 75   | 0.96     | 0.581239 |
| 243990_at | A15g40130 | 60S RIBOSOMAL PROTEIN L5 -like 60S ribosomal protein L5 (RPL5B)                    | 16  | 20  | 23  | 23  | 40   | 23  | 20  | 28   | 0.69     | 0.233278 | 15  | 19  | 14  | 23  | 18  | 13  | 17  | 15  | 16  | 17   | 0.94     | 0.685339 | 18   | 0.89     | 0.578681 |
| 243991_at | A15g40140 | putative protein predicted proteins, Arz armadillo/beta-catenin repeat family prot | 91  | 110 | 126 | 138 | 146  | 149 | 109 | 144  | 0.76     | 0.031943 | 62  | 52  | 69  | 77  | 59  | 57  | 70  | 73  | 70  | 61   | 0.91     | 0.358946 | 64   | 0.95     | 0.697633 |
| 243992_at | A15g40150 | peroxidase ATP26a                                                                  | 311 | 324 | 339 | 413 | 448  | 356 | 325 | 419  | 0.78     | 0.074559 | 323 | 333 | 347 | 560 | 367 | 370 | 360 | 343 | 334 | 400  | 0.84     | 0.287084 | 432  | 0.77     | 0.200724 |
| 243993_at | A15g40170 | disease resistance -like protein resist disease resistance -like protein           | 34  | 45  | 69  | 65  | 73   | 71  | 45  | 69   | 0.65     | 0.281704 | 50  | 38  | 67  | 66  | 56  | 62  | 68  | 61  | 53  | 62   | 0.93     | 0.331061 | 61   | 0.95     | 0.346914 |
| 243994_at | A15g40180 | outative protein predicted proteins, Arz hypothetical protein                      | 3   | 3   | 4   | 6   | 5    | 4   | 5   | 0.74 | 0.128026 | 3        | 3   | 4   | 7   | 6   | 11  | 4   | 7   | 6   | 11  | 4    | 0.44     | 0.032498 | 7    | 0.45     | 0.001647 |
| 243995_at | A15g40190 | putative protein calmodulin-binding protein                                        | 215 | 308 | 287 | 318 | 336  | 252 | 270 | 302  | 0.89     | 0.444238 | 251 | 290 | 267 | 374 | 308 | 301 | 296 | 319 | 269 | 320  | 0.84     | 0.049649 | 328  | 0.82     | 0.085713 |
| 243996_at | A15g40200 | DeoP protease contains similarity to De DegP protease, putative                    | 376 | 465 | 443 | 510 | 560  | 428 | 502 | 0.85 | 0.174042 | 325      | 322 | 384 | 477 | 425 | 344 | 402 | 376 | 343 | 405 | 0.85 | 0.116438 | 415      | 0.83 | 0.173690 |          |
| 243997_at | A15g40210 | outative protein MIN21, Medicago truncatula nodulin-related                        | 45  | 50  | 67  | 68  | 69   | 61  | 54  | 68   | 0.82     | 0.161208 | 44  | 44  | 41  | 48  | 52  | 44  | 56  | 49  | 44  | 49   | 0.91     | 0.226001 | 47   | 0.95     | 0.526667 |
| 243998_at | A15g40220 | RING finger -like protein RING-H2 zinc finger (C3H4C-type RING finger) fa          | 217 | 309 | 288 | 343 | 398  | 258 | 271 | 333  | 0.82     | 0.249450 | 235 | 252 | 230 | 358 | 292 | 276 | 320 | 289 | 239 | 307  | 0.78     | 0.013477 | 310  | 0.77     | 0.050006 |
| 243999_at | A15g40290 | putative protein intracellular protein Mc metal-dependent phosphohydrolase HD      | 20  | 25  | 34  | 30  | 34   | 25  | 27  | 30   | 0.89     | 0.545636 | 15  | 15  | 24  | 25  | 23  | 17  | 20  | 16  | 18  | 20   | 0.91     | 0.566808 | 21   | 0.85     | 0.450722 |
| 244000_at | A15g40300 | putative protein MIN29, Medicago truncatula integral membrane protein, putative    | 232 | 333 | 368 | 440 | 446  | 346 | 311 | 410  | 0.76     | 0.128936 | 360 | 355 | 388 | 547 | 463 | 442 | 392 | 358 | 367 | 440  | 0.83     | 0.148354 | 484  | 0.76     | 0.025533 |
| 244001_at | A15g40260 | outative protein LIM7, Lrv, EMBL.LLLOI nodulin MIN3 family protein                 | 464 | 587 | 646 | 35  | 41   | 36  | 566 | 37   | 15.23    | 0.006053 | 379 | 492 | 410 | 27  | 28  | 35  | 30  | 29  | 427 | 30   | 14.29    | 0.000004 | 30   | 14.16    | 0.000309 |
| 244002_at | A15g40270 | outative protein MIN29, Medicago truncatula integral membrane protein, putative    | 113 | 132 | 152 | 134 | 142  | 114 | 132 | 130  | 1.02     | 0.882543 | 97  | 93  | 131 | 133 | 106 | 85  | 89  | 91  | 107 | 101  | 1.06     | 0.675541 | 108  | 0.99     | 0.969564 |
| 244003_at | A15g40160 | ankyrin repeat protein EMB506 : supor ankyrin repeat protein (EMB506)              | 74  | 116 | 129 | 133 | 146  | 120 | 106 | 133  | 0.80     | 0.210240 | 105 | 131 | 135 | 174 | 146 | 125 | 134 | 128 | 124 | 141  | 0.87     | 0.248397 | 149  | 0.83     | 0.220570 |
| 244004_at | A15g40280 | beta subunit of protein kinase family protein farnesyltransferase beta subunit     | 171 | 201 | 237 | 258 | 286  | 242 | 203 | 262  | 0.78     | 0.063377 | 236 | 208 | 244 | 349 | 295 | 281 | 287 | 261 | 229 | 295  | 0.78     | 0.021608 | 308  | 0.74     | 0.027078 |
| 244005_at | A15g40210 | putative protein MIN21, Medicago truncatula nodulin MIN21 family protein           | 50  | 56  | 69  | 72  | 66   | 62  | 58  | 67   | 0.87     | 0.211379 | 55  | 67  | 77  | 96  | 82  | 78  | 94  | 74  | 66  | 83   | 0.80     | 0.055158 | 85   | 0.78     | 0.087382 |
| 244007_at | A15g40320 | outative protein predicted proteins, Arz DC1 domain-containing protein             | 37  | 65  | 53  | 51  | 57   | 45  | 52  | 51   | 1.01     | 0.938594 | 40  | 40  | 49  | 48  | 42  | 43  | 58  | 45  | 43  | 47   | 0.92     | 0.403742 | 44   | 0.98     | 0.779198 |
| 244008_at | A15g40330 | myb-related protein                                                                | 9   | 8   | 12  | 13  | 12   | 12  | 10  | 12   | 0.76     | 0.089666 | 4   | 6   | 12  | 7   | 8   | 7   | 10  | 8   | 7   | 8    | 0.92     | 0.745773 | 7    | 1.00     | 0.996405 |
| 244009_at | A15g40340 | outative protein KED, Nicotiana tabacum PPWIP domain-containing protein            | 632 | 646 | 828 | 752 | 787  | 632 | 669 | 723  | 0.92     | 0.606623 | 503 | 495 | 593 | 739 | 687 | 519 | 522 | 527 | 530 | 559  | 0.95     | 0.674445 | 582  | 0.91     | 0.576693 |
| 244010_at | A15g40380 | receptor-like protein kinase receptor-9 protein kinase family protein              | 40  | 41  | 47  | 44  | 48   | 40  | 43  | 44   | 0.98     | 0.777554 | 48  | 45  | 45  | 51  | 40  | 41  | 44  | 39  | 46  | 43   | 1.06     | 0.398130 | 44   | 1.04     | 0.606861 |
| 244011_at | A15g40390 | ribosome synthase -like protein riboflavin synthase family protein                 | 85  | 123 | 136 | 103 | 105  | 98  | 115 | 102  | 1.13     | 0.447006 | 67  | 61  | 77  | 70  | 62  | 57  | 74  | 63  | 69  | 65   | 1.06     | 0.520008 | 63   | 1.09     | 0.393376 |
| 244012_at | A15g40410 | putative protein predicted proteins, Arz pentatricopeptide (PPR) repeat-containi   | 57  | 62  | 66  | 92  | 96   | 86  | 68  | 91   | 0.75     | 0.071366 | 43  | 49  | 53  | 55  | 51  | 47  | 70  | 54  | 48  | 55   | 0.87     | 0.236651 | 51   | 0.94     | 0.468132 |
| 244013_at | A15g40450 | outative protein microtubule-associate expressed protein                           | 42  | 75  | 69  | 62  | 67   | 62  | 62  | 100  | 0.995387 | 38       | 39  | 42  | 46  | 37  | 38  | 45  | 40  | 39  | 41  | 0.96 | 0.562206 | 40       | 0.98 | 0.806045 |          |
| 244014_at | A15g40460 | outative protein predicted proteins, Arz expressed protein                         | 86  | 104 | 92  | 123 | 141  | 97  | 94  | 120  | 0.78     | 0.128820 | 82  | 76  | 94  | 88  | 80  | 76  | 88  | 82  | 81  | 85   | 0.95     | 0.505971 | 85   | 0.96     | 0.633200 |
| 244015_at | A15g40470 | glutathione S-transferase -like protein glutathione S-transferase, putative        | 84  | 109 | 124 | 142 | 158  | 112 | 107 | 137  | 0.78     | 0.100702 | 117 | 118 | 129 | 191 | 127 | 114 | 126 | 122 | 129 | 127  | 0.96     | 0.408577 | 120  | 0.98     | 0.508881 |
| 244016_at | A15g40480 | putative transcription factor MYB24 : s myb family transcription factor (MYB24)    | 17  | 19  | 25  | 35  | 43   | 33  | 20  | 37   | 0.55     | 0.010944 | 17  | 16  | 14  | 52  | 41  | 44  | 33  | 33  | 16  | 40   | 0.39     | 0.001876 | 45   | 0.34     | 0.000792 |
| 244017_at | A15g40360 | MYB -like protein MYB22, Arabidopsis myb family transcription factor (MYB115       | 21  | 21  | 24  | 27  | 25   | 22  | 22  | 25   | 0.90     | 0.251486 | 21  | 21  | 20  | 15  | 16  | 22  | 19  | 17  | 21  | 18   | 1.17     | 0.140808 | 18   | 1.17     | 0.265343 |
| 244018_at | A15g40440 | MAP kinase kinase 3 (ATMKK3) 10.01, mlozen-activated protein kinase kinase         | 138 | 181 | 206 | 235 | 253  | 211 | 175 | 233  | 0.75     | 0.056881 | 158 | 133 | 176 | 243 | 230 | 188 | 205 | 207 | 156 | 215  | 0.73     | 0.100899 | 220  | 0.71     | 0.036190 |
| 244019_at | A15g40430 | outative transcription factor MYB22 : s myb family transcription factor (MYB22)    | 15  | 14  | 20  | 11  | 17   | 15  | 16  | 14   | 1.15     | 0.426589 | 9   | 9   | 16  | 10  | 10  | 14  | 10  | 13  | 10  | 13   | 1.08     | 0.556947 | 9    | 1.30     | 0.333411 |
| 244020_at | A15g40420 | oleosin : supported by cDNA, ol 72521 glycine-rich protein / oleosin               | 24  | 27  | 33  | 322 | 42   | 34  | 28  | 133  | 0.21     | 0.333352 | 25  | 25  | 28  | 30  | 28  | 27  | 20  | 21  | 26  | 25   | 1.02     | 0.862302 | 29   | 0.91     | 0.133798 |
| 244021_at | A15g40480 | nuclear core protein -like nuclear core expressed protein                          | 569 | 749 | 741 | 884 | 1111 | 699 | 686 | 898  | 0.76     | 0.186311 | 484 | 378 | 529 | 633 | 589 | 477 | 599 | 554 | 463 | 570  | 0.81     | 0.067979 | 566  | 0.82     | 0.185916 |
| 244022_at | A15g40500 | hypothetical protein                                                               | 56  | 63  | 75  | 69  | 79   | 68  | 65  | 72   | 0.90     | 0.334961 | 62  | 69  | 68  | 72  | 55  | 51  | 85  | 80  | 66  | 69   | 0.87     | 0.808121 | 59   | 1.12     | 0.370771 |
| 244023_at | A15g40520 | outative protein predicted proteins, Arz expressed protein                         | 98  | 124 | 129 | 134 | 146  | 111 | 117 | 130  | 0.90     | 0.072559 | 91  | 79  | 95  | 106 | 109 | 88  | 93  | 94  | 106 | 98   | 0.94     | 0.509266 | 106  | 0.95     | 0.645521 |
| 244024_at | A15g40510 | ribonucleoprotein -like ribonucleoprotein RNA recognition motif (RRM)-containing   | 160 | 193 | 357 | 252 | 315  | 332 | 237 | 300  | 0.79     | 0.389893 | 128 | 138 | 180 | 172 | 157 | 156 | 199 | 187 | 149 | 174  | 0.85     | 0.165947 | 162  | 0.92     | 0.482097 |
| 244025_at | A15g40510 | sucrose cleavage protein -like sucrose expressed protein                           | 33  | 46  | 51  | 51  | 56   | 49  | 43  | 52   | 0.83     | 0.196825 | 34  | 31  | 36  | 36  | 32  | 33  | 34  | 34  | 34  | 34   | 0.98     | 0.698574 | 35   | 0.96     | 0.522401 |
| 244026_at | A15g40470 | outative protein unnamed ORF: Homo expressed protein                               | 77  | 104 | 106 | 91  | 112  | 91  | 96  | 98   | 0.98     | 0.853688 | 94  | 102 | 117 | 107 | 85  | 98  | 110 | 106 | 104 | 101  | 1.03     | 0.661506 | 97   | 1.08     | 0.436795 |
| 244027_at | A15g40530 | outative protein KAC4049 protein, Hor expressed protein                            | 152 | 190 | 214 | 237 | 227  | 165 | 185 | 220  | 0.84     | 0.192486 | 139 | 174 | 200 | 253 | 173 | 179 | 176 | 180 | 171 | 192  | 0.90     | 0.413741 | 201  | 0.85     | 0.386105 |
| 244028_at | A15g40540 | protein kinase - like protein protein kin protein kinase, putative                 | 48  | 50  | 52  | 50  | 50   | 51  | 49  | 54   | 0.94     | 0.555290 | 51  | 48  | 45  | 57  | 44  | 56  | 48  | 45  | 48  | 52   | 0.84     | 0.172905 | 52   | 0.84     | 0.059424 |
| 244029_at | A15g40550 | putative protein predicted proteins, Arz expressed protein                         | 82  | 111 | 117 | 148 | 141  | 121 | 103 | 137  | 0.76     | 0.069957 | 81  | 98  | 110 | 158 | 122 | 114 | 103 | 105 | 96  | 120  | 0.80     | 0.148744 | 131  | 0.73     | 0.091028 |
| 244030_at | A15g40560 | DeoP protease contains similarity to De DegP protease, putative                    | 3   | 2   | 5   | 2   | 5    | 4   | 3   | 4    | 0.90     | 0.793254 | 2   | 8   | 2   | 3   | 5   | 3   | 5   | 4   | 4   | 1.08 | 0.850887 | 4        | 1.09 | 0.865327 |          |
| 244031_at | A15g40590 | outative protein predicted proteins, Arz outative protein predicted protein. Arabi | 6   | 11  | 13  | 11  | 14   | 14  | 10  | 13   | 0.80     | 0.314471 | 8   | 9   | 11  | 9   | 7   | 10  | 10  | 7   | 9   | 9    | 1.08     | 0.524558 | 9    | 1.07     | 0.661270 |
| 244032_at | A15g40600 | outative protein predicted proteins, Arz hypothetical protein                      | 128 | 179 | 113 | 138 | 133  | 103 | 128 | 113  | 0.82     | 0.190760 | 128 | 129 | 162 | 72  | 63  | 68  | 72  | 63  | 68  | 72   | 0.96     | 0.724353 | 78   | 0.98     | 0.261411 |
| 244033_at | A15g40610 | dihydroxycetone 3-phosphate reducta oligo(3-phosphate dehydrogenase (N             | 199 | 240 | 234 | 264 | 274  | 219 | 224 | 252  | 0.89     | 0.252320 | 275 | 242 | 267 | 443 | 318 | 308 | 318 | 316 | 261 | 340  | 0.77     | 0.063937 | 356  | 0.73     | 0.100447 |
| 244034_at | A15g40630 | putative protein predicted proteins, Arz expressed protein                         | 29  | 31  | 39  | 50  | 46   | 46  | 33  | 47   | 0.70     | 0.011171 | 26  | 27  | 28  | 47  | 39  | 33  | 40  | 37  | 27  | 39   | 0.68     | 0.007790 | 40   | 0.68     | 0.039740 |
| 244035_at | A15g40640 | putative protein predicted proteins, Arz expressed protein                         | 112 | 145 | 152 | 212 | 217  | 156 | 138 | 195  |          |          |     |     |     |     |     |     |     |     |     |      |          |          |      |          |          |

|             |           |                                                                                       |      |      |      |      |      |      |      |      |          |          |      |      |      |      |      |      |      |      |      |      |          |          |      |          |          |
|-------------|-----------|---------------------------------------------------------------------------------------|------|------|------|------|------|------|------|------|----------|----------|------|------|------|------|------|------|------|------|------|------|----------|----------|------|----------|----------|
| 249291_at   | A15g41210 | glutathione transferase AGST 10 (emb glutathione S-transferase (GST10)                | 298  | 428  | 434  | 556  | 550  | 474  | 387  | 527  | 0.73     | 0.053237 | 414  | 523  | 475  | 758  | 543  | 515  | 538  | 500  | 471  | 571  | 0.83     | 0.189005 | 605  | 0.78     | 0.180638 |
| 249292_at   | A15g41150 | repar endonuclease (bIAAF214.1) : repair endonuclease (RAD1) (UVH1)                   | 169  | 91   | 84   | 84   | 101  | 74   | 81   | 86   | 0.94     | 0.626036 | 67   | 63   | 84   | 88   | 74   | 64   | 82   | 79   | 72   | 78   | 0.92     | 0.433950 | 75   | 0.95     | 0.699526 |
| 249293_at   | A15g41260 | protein kinase-like                                                                   | 171  | 240  | 237  | 247  | 251  | 190  | 216  | 229  | 0.94     | 0.685824 | 212  | 209  | 204  | 298  | 237  | 208  | 223  | 223  | 208  | 238  | 0.88     | 0.213201 | 248  | 0.84     | 0.214323 |
| 249294_at   | A15g41270 | unknown protein                                                                       | 111  | 133  | 122  | 147  | 169  | 134  | 140  | 159  | 0.92     | 0.389252 | 123  | 130  | 140  | 207  | 150  | 150  | 150  | 150  | 150  | 150  | 0.88     | 0.340521 | 157  | 0.83     | 0.270969 |
| 249295_at   | A15g41280 | outative protein contains similarity to ur hypothetical protein                       | 33   | 38   | 24   | 46   | 46   | 49   | 42   | 47   | 0.89     | 0.446954 | 33   | 31   | 40   | 39   | 30   | 32   | 40   | 35   | 36   | 36   | 0.96     | 0.656514 | 34   | 1.02     | 0.844816 |
| 249296_at   | A15g41310 | kinesin-like protein                                                                  | 30   | 35   | 37   | 38   | 40   | 37   | 34   | 38   | 0.88     | 0.104919 | 33   | 32   | 33   | 35   | 31   | 34   | 34   | 32   | 33   | 33   | 1.00     | 0.895482 | 33   | 0.99     | 0.854287 |
| 249297_at   | A15g41320 | unknown protein                                                                       | 31   | 31   | 31   | 27   | 27   | 28   | 31   | 27   | 1.12     | 0.000206 | 29   | 32   | 37   | 26   | 23   | 26   | 23   | 33   | 23   | 23   | 1.43     | 0.007843 | 22   | 1.49     | 0.026398 |
| 249298_at   | A15g41330 | putative protein similar to unknown prot channel tetramerisation dom                  | 65   | 80   | 84   | 107  | 106  | 93   | 80   | 102  | 0.78     | 0.078456 | 46   | 45   | 51   | 67   | 68   | 56   | 48   | 51   | 54   | 55   | 0.86     | 0.114658 | 48   | 0.78     | 0.154373 |
| 249299_at   | A15g41340 | E2, ubiquitin-conjugatino enzyme 4 (U) : ubiquitin-conjugating enzyme 4 (UBC4)        | 183  | 287  | 293  | 382  | 383  | 302  | 254  | 356  | 0.71     | 0.085184 | 289  | 327  | 339  | 497  | 393  | 384  | 298  | 295  | 318  | 373  | 0.85     | 0.316189 | 425  | 0.75     | 0.052910 |
| 249300_at   | A15g41380 | outative protein similar to unknown drot hypothetical protein                         | 16   | 27   | 24   | 26   | 24   | 22   | 24   | 24   | 0.93     | 0.651101 | 21   | 23   | 24   | 27   | 28   | 23   | 24   | 21   | 23   | 25   | 0.92     | 0.313270 | 26   | 0.87     | 0.129779 |
| 249301_at   | A15g41440 | outative protein similar to unknown drot zinc finger (C3HC4-tyoe RING finger) fa      | 21   | 32   | 39   | 27   | 46   | 28   | 31   | 34   | 0.90     | 0.689332 | 20   | 19   | 26   | 19   | 18   | 19   | 25   | 22   | 21   | 20   | 1.04     | 0.712630 | 19   | 1.14     | 0.294097 |
| 249302_at   | A15g41450 | outative protein similar to unknown drot zinc finger (C3HC4-tyoe RING finger) fa      | 10   | 12   | 14   | 12   | 12   | 13   | 12   | 12   | 0.92     | 0.389252 | 10   | 13   | 10   | 11   | 13   | 7    | 14   | 10   | 11   | 0.93 | 0.7      | 10       | 1.01 | 0.974801 |          |
| 249303_at   | A15g41460 | putative protein strom similar to unk fringe-related protein                          | 113  | 127  | 145  | 175  | 205  | 163  | 128  | 182  | 0.71     | 0.025161 | 140  | 158  | 186  | 286  | 170  | 151  | 166  | 165  | 161  | 178  | 0.91     | 0.488718 | 196  | 0.87     | 0.447582 |
| 249304_at   | A15g41480 | folypolyglutamate synthase-like protein: dhvdrofolate synthetase/folypolyglutam       | 186  | 231  | 203  | 275  | 273  | 224  | 207  | 257  | 0.80     | 0.077319 | 248  | 172  | 272  | 333  | 306  | 263  | 329  | 301  | 230  | 306  | 0.75     | 0.033832 | 301  | 0.77     | 0.127108 |
| 249305_at   | A15g41490 | putative protein strom similar to unk F-box family protein                            | 191  | 21   | 26   | 25   | 32   | 24   | 22   | 27   | 0.81     | 0.172081 | 21   | 21   | 21   | 20   | 17   | 22   | 20   | 16   | 21   | 19   | 1.10     | 0.239718 | 19   | 1.07     | 0.411282 |
| 249306_at   | A15g41400 | RING zinc finger protein-like : ausorte zinc finger (C3HC4-tyoe RING finger) fa       | 30   | 39   | 40   | 40   | 35   | 33   | 38   | 0.86 | 0.203165 | 20       | 30   | 29   | 27   | 20   | 25   | 30   | 25   | 26   | 26   | 1.02 | 0.882791 | 24       | 1.07 | 0.688965 |          |
| 249307_s_at | A15g41370 | DNA excision repair cross-complement DNA repair protein and transcription fact        | 141  | 201  | 206  | 222  | 265  | 180  | 183  | 222  | 0.82     | 0.289030 | 107  | 90   | 122  | 142  | 130  | 107  | 106  | 108  | 107  | 119  | 0.90     | 0.341044 | 127  | 0.84     | 0.215902 |
| 249308_at   | A15g41350 | putative protein similar : supported by cDNA: zinc finger (C3HC4-tyoe RING finger) fa | 167  | 273  | 281  | 291  | 312  | 254  | 240  | 285  | 0.84     | 0.325734 | 201  | 261  | 259  | 372  | 283  | 274  | 270  | 246  | 240  | 289  | 0.83     | 0.182145 | 309  | 0.78     | 0.135372 |
| 249309_at   | A15g41410 | homeotic protein BEL1 homolog : susc homeodomain protein (BEL1)                       | 346  | 422  | 380  | 475  | 633  | 428  | 383  | 511  | 0.75     | 0.123503 | 230  | 197  | 243  | 387  | 318  | 270  | 315  | 285  | 223  | 315  | 0.71     | 0.018422 | 325  | 0.69     | 0.049646 |
| 249310_at   | A15g41520 | putative protein contains similarity to : 40S ribosomal protein S10 (RPS10B)          | 2855 | 3211 | 3111 | 3415 | 3572 | 3248 | 3126 | 3412 | 0.92     | 0.161903 | 3016 | 3077 | 3343 | 3970 | 3122 | 3025 | 3591 | 3448 | 3145 | 3451 | 0.91     | 0.228190 | 3406 | 0.92     | 0.441494 |
| 249311_at   | A15g41540 | disease resistance protein-like                                                       | 30   | 31   | 42   | 38   | 40   | 40   | 34   | 39   | 0.87     | 0.269189 | 25   | 31   | 37   | 24   | 32   | 34   | 36   | 33   | 31   | 30   | 1.04     | 0.730873 | 27   | 1.15     | 0.400367 |
| 249312_at   | A15g41550 | disease resistance protein-like                                                       | 52   | 62   | 82   | 112  | 135  | 91   | 62   | 112  | 0.55     | 0.036700 | 37   | 34   | 39   | 45   | 42   | 39   | 49   | 47   | 37   | 44   | 0.83     | 0.026132 | 42   | 0.88     | 0.076393 |
| 249313_at   | A15g41560 | unknown protein                                                                       | 303  | 434  | 443  | 501  | 522  | 411  | 393  | 478  | 0.82     | 0.210275 | 474  | 495  | 504  | 707  | 579  | 520  | 490  | 460  | 491  | 551  | 0.89     | 0.344139 | 602  | 0.82     | 0.118592 |
| 249298_at   | A15g41580 | transcription factor-like protein                                                     | 116  | 171  | 171  | 178  | 197  | 150  | 152  | 175  | 0.87     | 0.385152 | 110  | 100  | 130  | 140  | 134  | 112  | 145  | 131  | 113  | 132  | 0.85     | 0.094911 | 129  | 0.88     | 0.270073 |
| 249255_at   | A15g41610 | Na+/H+ antiporter-like protein                                                        | 94   | 110  | 130  | 132  | 127  | 121  | 111  | 127  | 0.88     | 0.225617 | 92   | 82   | 95   | 109  | 88   | 83   | 130  | 107  | 90   | 106  | 0.85     | 0.194719 | 97   | 0.93     | 0.451511 |
| 249256_at   | A15g41620 | putative protein strom similar to unk expressed protein                               | 25   | 39   | 36   | 57   | 58   | 55   | 33   | 60   | 0.56     | 0.011525 | 30   | 24   | 38   | 55   | 49   | 45   | 52   | 46   | 31   | 50   | 0.82     | 0.002818 | 50   | 0.61     | 0.019337 |
| 249257_at   | A15g41640 | unknown protein                                                                       | 31   | 30   | 63   | 40   | 48   | 44   | 41   | 44   | 0.94     | 0.814973 | 28   | 29   | 31   | 24   | 29   | 29   | 34   | 33   | 30   | 30   | 0.99     | 0.872194 | 28   | 1.07     | 0.368490 |
| 249258_at   | A15g41650 | outative protein similar to unknown drot lactolactulohase lvase familly protein / c   | 39   | 48   | 52   | 49   | 52   | 48   | 46   | 49   | 0.93     | 0.438496 | 44   | 52   | 61   | 50   | 49   | 53   | 50   | 47   | 52   | 50   | 1.05     | 0.532410 | 51   | 1.03     | 0.785715 |
| 249259_at   | A15g41660 | outative protein similar to unknown drot hypothetical protein                         | 18   | 28   | 36   | 25   | 31   | 37   | 27   | 31   | 0.88     | 0.555356 | 22   | 23   | 23   | 18   | 22   | 18   | 23   | 19   | 23   | 20   | 1.14     | 0.126721 | 19   | 1.19     | 0.066152 |
| 249260_at   | A15g41680 | Pro kinase interactor 1-like protein                                                  | 20   | 20   | 20   | 20   | 20   | 20   | 20   | 20   | 0.88     | 0.425605 | 21   | 29   | 29   | 29   | 29   | 29   | 29   | 29   | 29   | 29   | 1.18     | 0.051329 | 23   | 1.19     | 0.074484 |
| 249261_at   | A15g41710 | putative protein similar to unknown prot Mutator-like transposase family              | 44   | 46   | 58   | 55   | 57   | 47   | 49   | 53   | 0.93     | 0.551384 | 45   | 44   | 52   | 46   | 45   | 36   | 55   | 50   | 47   | 46   | 1.01     | 0.918003 | 42   | 1.11     | 0.319531 |
| 249262_at   | A15g41720 | putative protein similar to unknown prot putative protein similar to unknown prot     | 10   | 11   | 18   | 13   | 19   | 12   | 15   | 15   | 0.99     | 0.974233 | 9    | 8    | 12   | 8    | 12   | 9    | 11   | 13   | 10   | 11   | 0.94     | 0.686933 | 10   | 1.03     | 0.838130 |
| 249263_at   | A15g41730 | putative protein contains similarity to ur protein kinase family protein              | 24   | 21   | 27   | 24   | 28   | 22   | 24   | 25   | 0.97     | 0.778695 | 22   | 15   | 21   | 23   | 20   | 19   | 21   | 27   | 19   | 22   | 0.88     | 0.311472 | 21   | 0.94     | 0.606292 |
| 249264_s_at | A15g41740 | disease resistance protein-like                                                       | 38   | 55   | 54   | 57   | 54   | 41   | 57   | 54   | 0.84     | 0.177156 | 35   | 42   | 36   | 35   | 34   | 29   | 36   | 38   | 35   | 1.09 | 0.230657 | 33       | 1.16 | 0.148700 |          |
| 249265_at   | A15g41700 | E2, ubiquitin-conjugatino enzyme 8 (U) : ubiquitin-conjugating enzyme 8 (UBC8)        | 1069 | 1542 | 1687 | 1477 | 1759 | 1303 | 1432 | 1513 | 0.95     | 0.742016 | 1580 | 1846 | 1665 | 2214 | 1780 | 1709 | 1937 | 1930 | 1697 | 1914 | 0.89     | 0.144922 | 1901 | 0.89     | 0.312742 |
| 249266_at   | A15g41670 | 6-phosphohulconate dehydroenase : 6-phosphohulconate dehydroenase fan                 | 473  | 528  | 524  | 588  | 627  | 564  | 509  | 597  | 0.85     | 0.025388 | 508  | 432  | 558  | 753  | 521  | 524  | 516  | 510  | 499  | 565  | 0.88     | 0.374085 | 600  | 0.83     | 0.303465 |
| 249267_at   | A15g41600 | putative protein contains similarity to 2d crooked family protein (RTNLB4)            | 908  | 1114 | 1335 | 1444 | 1567 | 1264 | 1129 | 1425 | 0.79     | 0.122191 | 951  | 1068 | 1107 | 1665 | 1284 | 1237 | 1043 | 997  | 1042 | 1245 | 0.84     | 0.255035 | 1395 | 0.75     | 0.060371 |
| 249268_at   | A15g41685 | Expressed protein : supported by cDNA: ribosomal import receptor subunit TC           | 802  | 921  | 905  | 1039 | 1064 | 831  | 876  | 1012 | 0.87     | 0.069680 | 984  | 1051 | 1098 | 1440 | 1163 | 1029 | 1163 | 1074 | 1044 | 1159 | 0.88     | 0.346066 | 1185 | 0.88     | 0.346066 |
| 249269_at   | A15g41700 | cell cycle control crn (crooked neck) protein, reticulon / cell cycl                  | 172  | 224  | 207  | 244  | 260  | 210  | 201  | 238  | 0.84     | 0.157894 | 107  | 97   | 131  | 152  | 139  | 102  | 156  | 149  | 112  | 140  | 0.80     | 0.107493 | 131  | 0.85     | 0.335426 |
| 249270_at   | A15g41780 | outative protein similar to unknown drot myosin heavy chain-related                   | 9    | 11   | 12   | 15   | 11   | 12   | 11   | 12   | 0.88     | 0.363747 | 7    | 8    | 11   | 7    | 9    | 8    | 10   | 7    | 9    | 8    | 1.09     | 0.574859 | 8    | 1.11     | 0.585914 |
| 249271_at   | A15g41790 | myosin heavy chain-like protein                                                       | 96   | 110  | 110  | 119  | 134  | 105  | 105  | 119  | 0.88     | 0.215398 | 86   | 70   | 77   | 113  | 91   | 78   | 96   | 88   | 78   | 93   | 0.84     | 0.123335 | 94   | 0.83     | 0.233645 |
| 249272_at   | A15g41820 | ceranvoicranv/ transferase alpha subur                                                | 47   | 69   | 69   | 62   | 65   | 55   | 58   | 60   | 0.95     | 0.709190 | 45   | 55   | 42   | 49   | 41   | 44   | 41   | 42   | 47   | 50   | 1.03     | 0.695991 | 41   | 1.09     | 0.662326 |
| 249273_at   | A15g41850 | unknown protein                                                                       | 123  | 167  | 160  | 178  | 163  | 132  | 158  | 140  | 1.13     | 0.310933 | 123  | 120  | 139  | 152  | 114  | 105  | 132  | 110  | 127  | 123  | 1.04     | 0.718651 | 124  | 1.03     | 0.859266 |
| 249274_at   | A15g41860 | unknown protein                                                                       | 25   | 34   | 37   | 36   | 32   | 35   | 92   | 0.82 | 0.487424 | 33       | 32   | 33   | 44   | 35   | 36   | 43   | 29   | 33   | 30   | 37   | 0.88     | 0.270205 | 38   | 0.86     | 0.159177 |
| 249275_at   | A15g41870 | polygalacturonase-like protein                                                        | 448  | 583  | 549  | 622  | 763  | 576  | 527  | 654  | 0.81     | 0.141300 | 452  | 444  | 465  | 737  | 637  | 542  | 552  | 535  | 454  | 601  | 0.75     | 0.028829 | 639  | 0.71     | 0.030917 |
| 249276_at   | A15g41880 | DNA polymerase-like protein IV (orn DNA primase small subunit familly                 | 273  | 283  | 292  | 408  | 359  | 339  | 283  | 369  | 0.77     | 0.015564 | 262  | 231  | 287  | 403  | 325  | 293  | 308  | 288  | 260  | 323  | 0.80     | 0.082051 | 340  | 0.76     | 0.093873 |
| 249277_at   | A15g41890 | GDSL-motif lipase/hydrolase-like orleat GDSL-motif lipase/hydrolase family o          | 21   | 26   | 32   | 21   | 28   | 22   | 123  | 0.92 | 0.066620 | 21       | 21   | 17   | 22   | 17   | 21   | 22   | 19   | 24   | 20   | 12   | 1.03     | 0.097256 | 20   | 1.22     | 0.900448 |
| 249278_at   | A15g41900 | outative protein strom similar to unk hydrophase, alpha/beta fold family protein      | 48   | 60   | 62   | 92   | 99   | 80   | 56   | 90   | 0.62     | 0.007815 | 44   | 35   | 46   | 74   | 55   | 60   | 59   | 52   | 42   | 60   | 0.69     | 0.017009 | 63   | 0.66     | 0.030387 |
| 249279_at   | A15g41920 | SCARECROW gene regulator-like prot: scarecrow transcription factor familly pro        |      |      |      |      |      |      |      |      |          |          |      |      |      |      |      |      |      |      |      |      |          |          |      |          |          |

|             |            |                                                                                      |      |      |      |      |      |      |      |      |          |          |      |      |      |      |      |      |      |      |      |      |          |          |      |          |          |
|-------------|------------|--------------------------------------------------------------------------------------|------|------|------|------|------|------|------|------|----------|----------|------|------|------|------|------|------|------|------|------|------|----------|----------|------|----------|----------|
| 249196_at   | A15fg42560 | unknown protein , supported by full-length abscisic acid-responsive HVA22 family c   | 203  | 264  | 239  | 257  | 301  | 222  | 235  | 260  | 0.91     | 0.442541 | 302  | 340  | 271  | 404  | 339  | 319  | 320  | 285  | 304  | 333  | 0.91     | 0.368127 | 354  | 0.86     | 0.198561 |
| 249197_at   | A15fg42380 | putative protein contains similarity to ca calmodulin-related protein, putative      | 30   | 18   | 22   | 45   | 62   | 35   | 23   | 47   | 0.50     | 0.053890 | 9    | 10   | 9    | 11   | 12   | 14   | 14   | 12   | 9    | 12   | 0.75     | 0.011747 | 12   | 0.77     | 0.004768 |
| 249198_s_at | A15fg42360 | putative protein similar to unknown drol kelch repeat-containing-F box family pro    | 213  | 254  | 258  | 310  | 342  | 228  | 242  | 294  | 0.82     | 0.233733 | 235  | 210  | 244  | 375  | 289  | 254  | 287  | 272  | 230  | 296  | 0.78     | 0.081257 | 306  | 0.75     | 0.108588 |
| 249199_at   | A15fg42500 | putative protein similar to unknown drol expressed protein                           | 386  | 515  | 559  | 694  | 650  | 479  | 486  | 586  | 0.83     | 0.270777 | 548  | 550  | 534  | 857  | 718  | 647  | 738  | 637  | 738  | 637  | 1.03     | 0.040491 | 739  | 0.97     | 0.029462 |
| 249200_at   | A15fg42540 | 5'-3' exoribonuclease 2 ; supported by c 5'-3' exoribonuclease (XRN2)                | 186  | 222  | 242  | 256  | 250  | 196  | 217  | 234  | 0.93     | 0.534029 | 143  | 133  | 158  | 214  | 157  | 133  | 168  | 162  | 145  | 167  | 0.87     | 0.275625 | 168  | 0.86     | 0.404966 |
| 249201_at   | A15fg42370 | putative protein similar to unknown drol expressed protein                           | 127  | 149  | 154  | 158  | 200  | 157  | 143  | 172  | 0.83     | 0.154485 | 118  | 106  | 125  | 153  | 137  | 124  | 132  | 132  | 117  | 136  | 0.86     | 0.047266 | 138  | 0.85     | 0.104129 |
| 249202_at   | A15fg42580 | cytochrome P450                                                                      | 321  | 34   | 55   | 36   | 42   | 41   | 40   | 40   | 1.01     | 0.99631  | 31   | 36   | 38   | 32   | 29   | 30   | 41   | 38   | 35   | 34   | 1.03     | 0.743034 | 30   | 1.16     | 0.094743 |
| 249203_at   | A15fg42590 | cytochrome P450 71A16, putative (CYP                                                 | 16   | 24   | 15   | 23   | 23   | 16   | 24   | 15   | 0.78     | 0.242503 | 18   | 19   | 22   | 25   | 18   | 22   | 25   | 18   | 22   | 25   | 0.87     | 0.307281 | 21   | 0.87     | 0.077544 |
| 249204_at   | A15fg42570 | unknown protein , supported by full-length expressed protein                         | 320  | 393  | 451  | 495  | 556  | 443  | 388  | 498  | 0.78     | 0.059483 | 379  | 489  | 435  | 624  | 515  | 483  | 504  | 449  | 434  | 515  | 0.84     | 0.128375 | 541  | 0.80     | 0.116553 |
| 249205_at   | A15fg42600 | cycloartenol synthase                                                                | 38   | 46   | 46   | 44   | 47   | 44   | 44   | 45   | 0.96     | 0.564103 | 31   | 35   | 34   | 38   | 41   | 32   | 36   | 35   | 34   | 37   | 0.92     | 0.236529 | 37   | 0.90     | 0.278646 |
| 249206_at   | A15fg42630 | putative protein similar to unknown drol myb family transcription factor (KAN4)      | 278  | 341  | 367  | 275  | 328  | 267  | 328  | 290  | 1.13     | 0.307798 | 227  | 272  | 278  | 343  | 258  | 242  | 282  | 244  | 259  | 274  | 0.95     | 0.611396 | 281  | 0.92     | 0.565928 |
| 249207_at   | A15fg42640 | C2H2-type zinc finger protein-like ; zinc finger (C2H2 type) family protein          | 12   | 13   | 13   | 13   | 15   | 16   | 12   | 15   | 0.82     | 0.039617 | 8    | 12   | 14   | 8    | 9    | 11   | 9    | 11   | 9    | 11   | 1.20     | 0.125253 | 9    | 1.17     | 0.422700 |
| 249208_at   | A15fg42650 | allene oxide synthase (emb CAA73184 allene oxide synthase (ACS) / hydroper           | 48   | 48   | 44   | 82   | 96   | 89   | 44   | 89   | 0.40     | 0.008715 | 24   | 29   | 36   | 52   | 47   | 46   | 49   | 51   | 29   | 49   | 0.60     | 0.005553 | 48   | 0.61     | 0.006234 |
| 249209_at   | A15fg42620 | major surface glycoprotein-like ; supp: expressed protein                            | 96   | 127  | 130  | 167  | 185  | 124  | 117  | 159  | 0.74     | 0.122280 | 54   | 54   | 53   | 75   | 61   | 51   | 56   | 57   | 53   | 60   | 0.89     | 0.270198 | 62   | 0.86     | 0.288517 |
| 249210_at   | A15fg42670 | unknown protein                                                                      | 118  | 180  | 170  | 206  | 209  | 179  | 157  | 198  | 0.79     | 0.126617 | 128  | 118  | 144  | 214  | 158  | 155  | 162  | 154  | 130  | 169  | 0.77     | 0.053282 | 176  | 0.74     | 0.088298 |
| 249211_at   | A15fg42680 | putative protein similar to unknown drol expressed protein                           | 53   | 47   | 57   | 62   | 68   | 55   | 53   | 62   | 0.85     | 0.137825 | 32   | 20   | 32   | 35   | 37   | 33   | 25   | 32   | 28   | 32   | 0.86     | 0.291568 | 35   | 0.79     | 0.157215 |
| 249212_at   | A15fg42690 | putative protein strong similarity to unk expressed protein                          | 33   | 37   | 39   | 43   | 49   | 36   | 36   | 43   | 0.85     | 0.189336 | 28   | 26   | 36   | 30   | 27   | 30   | 28   | 29   | 27   | 1.09 | 0.531586 | 26       | 1.14 | 0.465688 |          |
| 249213_at   | A15fg42700 | unknown protein                                                                      | 139  | 186  | 212  | 247  | 250  | 197  | 179  | 232  | 0.77     | 0.128169 | 178  | 214  | 242  | 312  | 241  | 223  | 182  | 196  | 211  | 231  | 0.92     | 0.576303 | 259  | 0.82     | 0.222125 |
| 249214_at   | A15fg42720 | beta-1,3-glucanase-like protein                                                      | 62   | 76   | 74   | 114  | 130  | 110  | 71   | 118  | 0.60     | 0.003118 | 69   | 69   | 81   | 141  | 90   | 96   | 118  | 120  | 73   | 113  | 0.64     | 0.019023 | 109  | 0.67     | 0.096117 |
| 249215_at   | A15fg42800 | dihydroflavonol 4-reductase                                                          | 28   | 30   | 44   | 26   | 28   | 24   | 31   | 26   | 1.19     | 0.546725 | 250  | 324  | 330  | 96   | 87   | 81   | 79   | 75   | 301  | 84   | 3.59     | 0.000300 | 88   | 3.41     | 0.001212 |
| 249188_at   | A15fg42830 | N-hydroxytransmethyl benzoyltransferase                                              | 34   | 61   | 49   | 49   | 61   | 47   | 45   | 52   | 0.86     | 0.334680 | 45   | 45   | 53   | 49   | 50   | 54   | 47   | 50   | 48   | 50   | 0.96     | 0.410159 | 51   | 0.94     | 0.374035 |
| 249189_at   | A15fg42780 | putative protein similar to unknown drol zinc finger homeobox family protein / ZF    | 85   | 122  | 128  | 159  | 184  | 145  | 112  | 163  | 0.69     | 0.043629 | 84   | 97   | 113  | 183  | 132  | 112  | 98   | 98   | 125  | 97   | 0.79     | 0.271641 | 142  | 0.69     | 0.123295 |
| 249190_at   | A15fg42750 | unknown protein                                                                      | 86   | 107  | 111  | 110  | 133  | 107  | 101  | 117  | 0.87     | 0.238085 | 93   | 103  | 101  | 147  | 110  | 116  | 126  | 109  | 99   | 122  | 0.82     | 0.059317 | 124  | 0.80     | 0.103504 |
| 249191_at   | A15fg42760 | putative protein similar to unknown drol O-methyltransferase N-terminus domain       | 70   | 77   | 82   | 97   | 82   | 75   | 76   | 85   | 0.90     | 0.338664 | 81   | 78   | 93   | 114  | 94   | 78   | 68   | 76   | 84   | 86   | 0.88     | 0.878711 | 95   | 0.88     | 0.378696 |
| 249160_at   | A15fg42660 | putative protein similar to unknown drol expressed protein                           | 69   | 94   | 113  | 118  | 78   | 81   | 103  | 79   | 0.79     | 0.208612 | 70   | 74   | 84   | 122  | 86   | 96   | 91   | 77   | 76   | 95   | 0.80     | 0.128933 | 101  | 0.75     | 0.092870 |
| 249161_at   | A15fg42790 | 20S proteasome subunit PA1 (apbAAC) 20S proteasome alpha subunit F1 (PAF             | 1232 | 1414 | 1334 | 1655 | 1792 | 1431 | 1326 | 1626 | 0.82     | 0.063500 | 1354 | 1376 | 1474 | 2049 | 1683 | 1406 | 1536 | 1536 | 1401 | 1642 | 0.85     | 0.159809 | 1713 | 0.82     | 0.175945 |
| 249162_at   | A15fg42765 | Expressed protein ; supported by full-length expressed protein                       | 135  | 130  | 213  | 213  | 224  | 198  | 159  | 212  | 0.75     | 0.134574 | 126  | 165  | 200  | 255  | 177  | 195  | 181  | 177  | 164  | 197  | 0.83     | 0.230478 | 209  | 0.78     | 0.225750 |
| 249163_at   | A15fg42740 | glucose-6-phosphate isomerase, cytosol                                               | 136  | 219  | 222  | 254  | 261  | 218  | 212  | 244  | 0.87     | 0.112156 | 151  | 127  | 170  | 201  | 175  | 140  | 178  | 175  | 149  | 174  | 0.86     | 0.112701 | 172  | 0.87     | 0.351829 |
| 249164_at   | A15fg42820 | U2 snRNP auxiliary factor, small subor U2 snRNP auxiliary factor small subunit.      | 429  | 638  | 750  | 651  | 683  | 654  | 605  | 663  | 0.91     | 0.577783 | 428  | 634  | 550  | 748  | 501  | 523  | 583  | 606  | 538  | 592  | 0.91     | 0.478869 | 591  | 0.91     | 0.619629 |
| 249165_at   | A15fg42810 | putative protein strong similarity to unk expressed protein                          | 128  | 152  | 124  | 158  | 142  | 124  | 108  | 142  | 0.86     | 0.007815 | 117  | 119  | 124  | 170  | 154  | 144  | 166  | 129  | 173  | 172  | 0.76     | 0.071127 | 173  | 0.76     | 0.071127 |
| 249166_at   | A15fg42840 | CHP-rich zinc finger protein-like DC1 domain-containing factor                       | 44   | 48   | 50   | 55   | 55   | 44   | 54   | 0.83 | 0.032028 | 31       | 35   | 42   | 39   | 34   | 31   | 38   | 34   | 36   | 35   | 1.02 | 0.835849 | 35       | 1.04 | 0.748876 |          |
| 249167_at   | A15fg42860 | putative protein similar to unknown drol expressed protein                           | 24   | 28   | 26   | 36   | 26   | 29   | 26   | 30   | 0.86     | 0.276354 | 32   | 32   | 30   | 32   | 24   | 19   | 30   | 30   | 28   | 27   | 1.04     | 0.766355 | 25   | 1.12     | 0.523502 |
| 249168_at   | A15fg42870 | putative protein strong similarity to unk ipin family protein                        | 109  | 160  | 148  | 164  | 168  | 123  | 139  | 152  | 0.92     | 0.576278 | 99   | 83   | 94   | 117  | 97   | 76   | 94   | 94   | 92   | 96   | 0.96     | 0.712576 | 97   | 0.95     | 0.727214 |
| 249169_at   | A15fg42880 | putative protein strong similarity to unk hypothetical protein                       | 27   | 32   | 25   | 48   | 37   | 43   | 28   | 50   | 0.56     | 0.007336 | 12   | 12   | 14   | 30   | 21   | 15   | 18   | 20   | 13   | 21   | 0.60     | 0.056043 | 22   | 0.57     | 0.100904 |
| 249170_at   | A15fg42910 | abscisic acid responsive elements-bind basic leucine zipper transcription factor i   | 12   | 17   | 18   | 22   | 23   | 21   | 16   | 22   | 0.72     | 0.027965 | 16   | 16   | 21   | 19   | 20   | 14   | 22   | 14   | 18   | 18   | 1.01     | 0.971034 | 18   | 1.02     | 0.908766 |
| 249171_at   | A15fg42940 | unknown protein contains similarity to RI zinc finger (3CH34-zinc RING finger) fa    | 107  | 145  | 181  | 142  | 158  | 136  | 145  | 145  | 1.00     | 0.984559 | 91   | 99   | 90   | 91   | 85   | 78   | 107  | 98   | 94   | 92   | 1.02     | 0.834818 | 85   | 1.10     | 0.141709 |
| 249172_at   | A15fg42950 | putative protein similar to unknown drol GYF domain-containing protein               | 390  | 535  | 607  | 426  | 472  | 366  | 511  | 421  | 1.21     | 0.274885 | 343  | 310  | 317  | 375  | 292  | 281  | 480  | 453  | 323  | 376  | 0.86     | 0.863955 | 316  | 1.02     | 0.824666 |
| 249173_at   | A15fg42960 | unknown protein                                                                      | 26   | 25   | 29   | 31   | 31   | 30   | 27   | 31   | 0.88     | 0.037152 | 24   | 24   | 25   | 25   | 26   | 33   | 24   | 25   | 27   | 33   | 0.84     | 0.240199 | 25   | 0.98     | 0.176700 |
| 249174_at   | A15fg42900 | putative protein similar to unknown drol expressed protein                           | 99   | 89   | 152  | 43   | 111  | 81   | 113  | 78   | 1.45     | 0.276224 | 103  | 155  | 152  | 79   | 61   | 154  | 134  | 123  | 137  | 110  | 1.24     | 0.346361 | 98   | 1.40     | 0.301488 |
| 249175_at   | A15fg42970 | COP8 (constitutive oligomerohomocent) COP9 signalosome complex subunit 4 /           | 393  | 493  | 478  | 545  | 645  | 479  | 453  | 557  | 0.81     | 0.145990 | 427  | 387  | 459  | 572  | 510  | 452  | 451  | 428  | 424  | 483  | 0.88     | 0.177557 | 424  | 0.83     | 0.098751 |
| 249176_at   | A15fg42980 | thioredoxin (clone GIF1) (prfIS58118) thioredoxin H-type 3 (TRX-H-3) (GIF1)          | 1639 | 1878 | 1980 | 2265 | 2398 | 2086 | 1832 | 2250 | 0.81     | 0.037117 | 1631 | 1607 | 1697 | 2228 | 1854 | 1645 | 1972 | 1744 | 1645 | 1929 | 0.85     | 0.087304 | 1909 | 0.86     | 0.200905 |
| 249177_at   | A15fg42850 | unknown protein , supported by full-length expressed protein                         | 199  | 274  | 302  | 357  | 365  | 358  | 289  | 360  | 0.72     | 0.037156 | 223  | 315  | 284  | 410  | 278  | 271  | 292  | 274  | 317  | 315  | 0.88     | 0.401708 | 315  | 0.87     | 0.485956 |
| 249178_at   | A15fg42900 | putative protein similar to unknown drol sterol carrier protein 2 (SCP-2) family pr  | 1019 | 1178 | 1216 | 1360 | 1603 | 1276 | 1338 | 1413 | 0.81     | 0.075176 | 1319 | 1321 | 1581 | 1536 | 1469 | 1344 | 1500 | 1389 | 1445 | 1500 | 1.03     | 0.049911 | 1517 | 0.89     | 0.176765 |
| 249179_at   | A15fg42955 | Expressed protein ; supported by full-length expressed protein (I) expressed protein | 155  | 276  | 367  | 13   | 16   | 13   | 266  | 14   | 19.30    | 0.014861 | 886  | 911  | 849  | 21   | 16   | 46   | 15   | 19   | 882  | 23   | 38.03    | 0.000000 | 27   | 32.12    | 0.000002 |
| 249180_at   | A15fg43010 | 26S proteasome AAA-ATPase subunit                                                    | 712  | 841  | 804  | 1062 | 1101 | 955  | 785  | 1039 | 0.76     | 0.011869 | 748  | 811  | 918  | 1229 | 983  | 803  | 946  | 903  | 826  | 973  | 0.85     | 0.195428 | 1005 | 0.82     | 0.249121 |
| 249181_at   | A15fg42920 | putative protein contains similarity to 26S proteasome AAA-ATPase subunit (I         | 321  | 476  | 484  | 548  | 599  | 496  | 450  | 548  | 0.82     | 0.081395 | 367  | 334  | 371  | 507  | 429  | 483  | 467  | 443  | 358  | 442  | 0.81     | 0.041886 | 433  | 0.83     | 0.154989 |
| 249182_at   | A15fg42960 | putative protein similar to unknown drol expressed protein                           | 379  | 445  | 494  | 536  | 496  | 445  | 530  | 0.84 | 0.094178 | 436      | 492  | 498  | 495  | 481  | 430  | 486  | 495  | 481  | 430  | 486  | 0.89     | 0.039846 | 500  | 0.79     | 0.114322 |
| 249183_at   | A15fg42990 | E2, ubiquitin-conjugating enzyme 18 (U18) (ubiquitin-conjugating enzyme 18 (UBC1)    | 202  | 266  | 251  | 305  | 347  | 243  | 240  | 298  | 0.80     | 0.179852 |      |      |      |      |      |      |      |      |      |      |          |          |      |          |          |

|           |            |                                           |                                                     |      |      |      |      |      |      |      |      |      |          |      |      |      |      |      |      |      |      |      |      |          |          |      |          |          |
|-----------|------------|-------------------------------------------|-----------------------------------------------------|------|------|------|------|------|------|------|------|------|----------|------|------|------|------|------|------|------|------|------|------|----------|----------|------|----------|----------|
| 249108_at | A15fg43690 | steroid sulfotransferase-like             | steroid sulfotransferase-like                       | 30   | 28   | 40   | 39   | 39   | 40   | 32   | 39   | 0.82 | 0.131419 | 20   | 22   | 38   | 26   | 24   | 23   | 23   | 20   | 27   | 23   | 1.16     | 0.430461 | 24   | 1.10     | 0.688703 |
| 249109_at | A15fg43700 | auxin-induced protein AUX2-11 (sp P3)     | auxin-responsive protein / indoleacetic a           | 139  | 205  | 197  | 211  | 217  | 203  | 180  | 210  | 0.86 | 0.235913 | 171  | 152  | 182  | 234  | 156  | 157  | 161  | 149  | 169  | 171  | 0.98     | 0.904771 | 182  | 0.93     | 0.645381 |
| 249110_at | A15fg43730 | disease resistance protein                | disease resistance protein (CC-NBS-LR               | 13   | 15   | 19   | 20   | 18   | 18   | 16   | 18   | 0.86 | 0.248790 | 13   | 12   | 14   | 12   | 13   | 18   | 16   | 13   | 15   | 0.89 | 0.296449 | 13       | 0.99 | 0.931895 |          |
| 249111_at | A15fg43740 | protein kinase family protein             | protein kinase family protein                       | 30   | 47   | 39   | 47   | 45   | 36   | 40   | 37   | 0.77 | 0.160560 | 29   | 33   | 39   | 34   | 36   | 34   | 36   | 34   | 35   | 0.97 | 0.762260 | 29       | 0.96 | 0.931895 |          |
| 249112_at | A15fg43790 | ATP sulfurylase precursor (rho)AAD266     | sulfate adenylyltransferase 4 / ATP-sulf.           | 96   | 136  | 168  | 152  | 173  | 130  | 133  | 152  | 0.88 | 0.494941 | 109  | 93   | 117  | 173  | 119  | 120  | 155  | 172  | 106  | 148  | 0.72     | 0.047806 | 137  | 0.77     | 0.181977 |
| 249113_at | A15fg43790 | putative protein similar to unknown pr    | pentatricopeptide (PPR) repeat-containi             | 73   | 91   | 97   | 128  | 127  | 103  | 87   | 119  | 0.73 | 0.039837 | 88   | 93   | 100  | 155  | 115  | 116  | 135  | 118  | 93   | 128  | 0.73     | 0.017642 | 129  | 0.73     | 0.062410 |
| 249114_at | A15fg43800 | putative protein similar to unknown pro   | cop-like retrotransposon family                     | 56   | 61   | 70   | 66   | 77   | 72   | 62   | 72   | 0.87 | 0.151937 | 36   | 39   | 46   | 44   | 38   | 40   | 39   | 41   | 40   | 100  | 0.880683 | 41       | 0.99 | 0.943772 |          |
| 249115_at | A15fg43810 | RNAH48 (rho)AAD008-1; translation         | factor (H48AD) / zwille pro                         | 429  | 633  | 640  | 608  | 670  | 530  | 696  | 678  | 0.78 | 0.101605 | 520  | 511  | 603  | 447  | 547  | 529  | 562  | 546  | 529  | 362  | 0.302819 | 361      | 0.99 | 0.926546 |          |
| 249116_at | A15fg43820 | putative protein similar to unknown dr    | pentatricopeptide (PPR) repeat-containi             | 150  | 189  | 213  | 183  | 212  | 168  | 184  | 188  | 0.98 | 0.886738 | 198  | 225  | 211  | 257  | 210  | 187  | 248  | 220  | 212  | 225  | 0.94     | 0.495442 | 218  | 0.97     | 0.776380 |
| 249117_at | A15fg43840 | heat shock transcription factor-like prot | heat shock transcription factor family rc           | 13   | 19   | 44   | 22   | 31   | 31   | 25   | 28   | 0.91 | 0.814079 | 11   | 5    | 9    | 12   | 8    | 9    | 10   | 8    | 9    | 10   | 0.88     | 0.459570 | 10   | 0.86     | 0.541078 |
| 249118_at | A15fg43870 | unknown protein similar to unknown dr     | expressed protein                                   | 54   | 75   | 75   | 71   | 93   | 75   | 68   | 80   | 0.86 | 0.297065 | 36   | 44   | 49   | 52   | 40   | 46   | 41   | 43   | 44   | 0.97 | 0.178199 | 44       | 0.97 | 0.798916 |          |
| 249119_at | A15fg43720 | unknown protein - supported by full-len   | expressed protein                                   | 193  | 234  | 258  | 260  | 280  | 211  | 228  | 250  | 0.91 | 0.170662 | 187  | 216  | 211  | 257  | 224  | 203  | 199  | 202  | 205  | 219  | 0.94     | 0.474224 | 231  | 0.89     | 0.275710 |
| 249120_at | A15fg43750 | unknown protein - supported by full-len   | expressed protein                                   | 44   | 67   | 59   | 101  | 100  | 81   | 50   | 57   | 0.57 | 0.013375 | 47   | 50   | 63   | 116  | 61   | 71   | 75   | 73   | 54   | 63   | 0.64     | 0.045548 | 89   | 0.60     | 0.071400 |
| 249121_at | A15fg43830 | aluminum-induced protein-like ; supp      | o expressed protein                                 | 1296 | 1961 | 1933 | 1557 | 1804 | 1415 | 1730 | 1592 | 1.00 | 0.604370 | 1309 | 1564 | 1288 | 1681 | 1393 | 1333 | 1281 | 1222 | 1387 | 1382 | 1.00     | 0.970151 | 1469 | 0.94     | 0.587160 |
| 249122_at | A15fg43850 | putative protein similar to unknown pr    | aceticulactone dioxygenase (ARD/ARD) I              | 250  | 370  | 442  | 439  | 495  | 363  | 354  | 432  | 0.82 | 0.310556 | 413  | 487  | 457  | 714  | 539  | 498  | 488  | 497  | 452  | 547  | 0.83     | 0.159002 | 584  | 0.77     | 0.132414 |
| 249123_at | A15fg43760 | beta-ketoadipyl-CoA synthase              | + succinate beta-ketoadipyl-CoA synthase, putative  | 553  | 514  | 457  | 684  | 716  | 607  | 508  | 669  | 0.97 | 0.019742 | 408  | 381  | 512  | 619  | 548  | 488  | 578  | 597  | 434  | 556  | 0.77     | 0.054880 | 535  | 0.81     | 0.202096 |
| 249124_at | A15fg43880 | putative protein similar to unknown dr    | expressed protein                                   | 216  | 277  | 300  | 312  | 332  | 267  | 294  | 304  | 0.87 | 0.281824 | 189  | 173  | 204  | 267  | 200  | 211  | 204  | 189  | 215  | 0.88 | 0.303111 | 220      | 0.86 | 0.371342 |          |
| 249090_at | A15fg43745 | Excessed protein ; supported by           | RNA phosphatransferase-related                      | 88   | 111  | 99   | 100  | 124  | 104  | 99   | 109  | 0.91 | 0.378810 | 80   | 76   | 87   | 92   | 109  | 86   | 132  | 118  | 81   | 107  | 0.76     | 0.061463 | 95   | 0.85     | 0.120077 |
| 249091_at | A15fg43860 | AtCLH2 (abi)AFZ7046.1 ; supported         | chlorophyllase (CLH2)                               | 24   | 28   | 38   | 37   | 32   | 35   | 30   | 35   | 0.86 | 0.331834 | 25   | 26   | 28   | 31   | 27   | 26   | 27   | 29   | 26   | 28   | 0.94     | 0.263645 | 28   | 0.93     | 0.378211 |
| 249092_at | A15fg43710 | putative protein similar to unknown dr    | glycoside hydrolase family 47 protein               | 145  | 181  | 190  | 223  | 257  | 175  | 172  | 218  | 0.79 | 0.186217 | 130  | 119  | 147  | 211  | 168  | 143  | 151  | 150  | 132  | 165  | 0.80     | 0.110997 | 174  | 0.76     | 0.120914 |
| 249093_at | A15fg43890 | putative protein similar to unknown dr    | expressed protein                                   | 216  | 277  | 300  | 312  | 332  | 267  | 294  | 304  | 0.87 | 0.281824 | 189  | 173  | 204  | 267  | 200  | 211  | 204  | 189  | 215  | 0.88 | 0.303111 | 220      | 0.86 | 0.371342 |          |
| 249094_at | A15fg43890 | dimethylamline monoacylate-like           | flavin-cannaryl monooxygenase fami                  | 61   | 66   | 94   | 94   | 103  | 89   | 74   | 95   | 0.77 | 0.122569 | 56   | 56   | 74   | 75   | 60   | 63   | 71   | 67   | 62   | 67   | 0.92     | 0.374964 | 66   | 0.94     | 0.611884 |
| 249095_at | A15fg43900 | mysin heav chain MYO2A (nir)IS51824       | myosin heavy chain (MYA2)                           | 142  | 162  | 187  | 203  | 231  | 157  | 164  | 197  | 0.83 | 0.255101 | 108  | 92   | 121  | 152  | 136  | 108  | 128  | 127  | 107  | 130  | 0.86     | 0.082392 | 132  | 0.81     | 0.174473 |
| 249096_at | A15fg43910 | putative protein similar to unknown dr    | alpha-D-glucose 6-phosphate carboxylase kinase fami | 44   | 49   | 54   | 74   | 72   | 65   | 49   | 70   | 0.70 | 0.050925 | 47   | 46   | 43   | 92   | 70   | 58   | 58   | 58   | 45   | 67   | 0.68     | 0.049778 | 73   | 0.62     | 0.050008 |
| 249097_at | A15fg43920 | WD-repeat protein-like                    | transducin family protein / WD-40 repeat            | 159  | 240  | 277  | 273  | 285  | 221  | 225  | 260  | 0.87 | 0.435370 | 194  | 173  | 203  | 229  | 190  | 172  | 268  | 245  | 190  | 221  | 0.86     | 0.251538 | 197  | 0.86     | 0.272460 |
| 249098_at | A15fg43960 | putative protein similar to unknown pr    | nuclear transport factor 2 (NTF2) fami              | 446  | 524  | 577  | 682  | 758  | 621  | 516  | 687  | 0.75 | 0.035814 | 485  | 510  | 547  | 775  | 626  | 560  | 663  | 619  | 514  | 648  | 0.79     | 0.034388 | 653  | 0.79     | 0.052481 |
| 249098_at | A15fg43980 | putative protein similar to unknown pr    | expressed protein                                   | 86   | 90   | 112  | 131  | 143  | 126  | 96   | 133  | 0.72 | 0.016566 | 89   | 98   | 103  | 168  | 136  | 132  | 119  | 121  | 97   | 107  | 0.77     | 0.020145 | 145  | 0.67     | 0.071718 |
| 249099_at | A15fg44010 | unknown protein                           | receptor-like protein                               | 29   | 39   | 38   | 49   | 44   | 41   | 35   | 45   | 0.79 | 0.087666 | 33   | 28   | 41   | 50   | 32   | 36   | 35   | 31   | 34   | 37   | 0.93     | 0.625319 | 39   | 0.87     | 0.485503 |
| 249070_at | A15fg44030 | cellulose synthase catalytic subunit-like | cellulose synthase, catalytic subunit (IPO          | 59   | 68   | 74   | 95   | 114  | 96   | 67   | 102  | 0.66 | 0.010392 | 40   | 36   | 50   | 67   | 45   | 44   | 48   | 51   | 42   | 51   | 0.82     | 0.197039 | 52   | 0.81     | 0.302483 |
| 249071_at | A15fg44200 | putative protein similar to unknown pr    | cytochrome P450 family protein                      | 18   | 19   | 29   | 24   | 31   | 31   | 22   | 28   | 0.79 | 0.194331 | 11   | 19   | 23   | 15   | 16   | 15   | 12   | 14   | 20   | 15   | 1.32     | 0.295381 | 15   | 1.32     | 0.474167 |
| 249072_at | A15fg44060 | putative protein similar to unknown pr    | phosphatase family protein                          | 222  | 233  | 232  | 375  | 344  | 298  | 229  | 339  | 0.68 | 0.008269 | 356  | 457  | 461  | 657  | 440  | 372  | 529  | 509  | 425  | 502  | 0.85     | 0.304788 | 490  | 0.87     | 0.520838 |
| 249073_at | A15fg44020 | vegetative storage protein-like ; supp    | acid phosphatase class B family protein             | 100  | 115  | 100  | 90   | 93   | 76   | 105  | 86   | 1.22 | 0.060442 | 59   | 52   | 57   | 43   | 54   | 49   | 64   | 53   | 56   | 53   | 1.06     | 0.538249 | 49   | 1.14     | 0.143921 |
| 249074_at | A15fg44080 | putative protein contains similarity to   | G-2BP transcription factor family protein           | 323  | 525  | 494  | 433  | 482  | 382  | 447  | 432  | 1.03 | 0.084591 | 417  | 505  | 440  | 607  | 449  | 439  | 599  | 554  | 454  | 530  | 0.86     | 0.194884 | 498  | 0.91     | 0.503462 |
| 249075_at | A15fg44090 | putative protein contains similarity to   | ur transducin family protein                        | 152  | 241  | 255  | 263  | 292  | 219  | 216  | 259  | 0.84 | 0.337609 | 201  | 232  | 215  | 281  | 229  | 234  | 236  | 240  | 236  | 240  | 0.86     | 0.057463 | 248  | 0.83     | 0.071397 |
| 249076_at | A15fg43970 | putative protein similar to unknown dr    | expressed protein                                   | 279  | 333  | 346  | 338  | 353  | 341  | 319  | 344  | 0.93 | 0.300022 | 284  | 335  | 376  | 441  | 364  | 330  | 303  | 310  | 332  | 349  | 0.95     | 0.659746 | 378  | 0.88     | 0.332902 |
| 249077_at | A15fg43940 | alcohol dehydrogenase (EC 1.1.1.1) d      | alcohol dehydrogenase class III / alutath           | 1311 | 1759 | 1635 | 2041 | 2172 | 1682 | 1568 | 2032 | 0.77 | 0.042395 | 1426 | 1552 | 1682 | 2167 | 1869 | 1525 | 1911 | 1832 | 1554 | 1861 | 0.83     | 0.081436 | 1853 | 0.84     | 0.207476 |
| 249078_at | A15fg44070 | phytochelatin synthase (phi)AAD41794      | phytochelatin synthase 1 (PCS1)                     | 236  | 222  | 230  | 315  | 333  | 304  | 229  | 317  | 0.72 | 0.000758 | 222  | 225  | 231  | 363  | 323  | 234  | 353  | 320  | 226  | 319  | 0.71     | 0.022256 | 307  | 0.74     | 0.101768 |
| 249079_at | A15fg44030 | putative protein contains similarity to   | ur transducin family protein                        | 152  | 241  | 255  | 263  | 292  | 219  | 216  | 259  | 0.84 | 0.337609 | 201  | 232  | 215  | 281  | 229  | 234  | 236  | 240  | 236  | 240  | 0.86     | 0.057463 | 248  | 0.83     | 0.071397 |
| 249080_at | A15fg43990 | putative protein strong similarity to     | unkn SET domain-containing protein                  | 255  | 352  | 328  | 378  | 405  | 476  | 350  | 428  | 0.80 | 0.189937 | 208  | 197  | 241  | 288  | 267  | 219  | 286  | 272  | 215  | 266  | 0.81     | 0.038333 | 258  | 0.84     | 0.155336 |
| 249081_at | A15fg44090 | protein chospatase 2A 62 kDa B reou       | calcium-binding EF hand family protein.             | 136  | 186  | 205  | 179  | 199  | 141  | 176  | 173  | 1.02 | 0.924293 | 124  | 126  | 128  | 154  | 128  | 117  | 151  | 135  | 126  | 137  | 0.92     | 0.284557 | 133  | 0.95     | 0.560203 |
| 249082_at | A15fg44120 | legum-lik protein                         | 12S seed storage protein (CRA1)                     | 13   | 13   | 20   | 1318 | 17   | 15   | 15   | 450  | 0.03 | 0.373334 | 11   | 10   | 11   | 13   | 10   | 11   | 8    | 18   | 11   | 11   | 0.96     | 0.857791 | 10   | 1.04     | 0.786358 |
| 249083_at | A15fg44140 | coribritin non-consensus TT acceptor ;    | prohibitin, putative                                | 32   | 34   | 31   | 31   | 35   | 31   | 30   | 32   | 0.94 | 0.530657 | 28   | 35   | 34   | 32   | 27   | 34   | 31   | 34   | 30   | 31   | 1.04     | 0.558301 | 30   | 1.07     | 0.475249 |
| 249084_at | A15fg44150 | unknown protein                           | expressed protein                                   | 124  | 131  | 144  | 150  | 172  | 145  | 128  | 155  | 0.81 | 0.111728 | 130  | 145  | 140  | 228  | 179  | 164  | 147  | 138  | 141  | 171  | 0.83     | 0.214712 | 189  | 0.75     | 0.070552 |
| 249085_at | A15fg44170 | putative protein similar to unknown pr    | expressed protein                                   | 102  | 116  | 131  | 135  | 147  | 138  | 116  | 140  | 0.83 | 0.058667 | 142  | 163  | 154  | 223  | 173  | 162  | 165  | 157  | 153  | 176  | 0.87     | 0.205598 | 186  | 0.82     | 0.162940 |
| 249086_at | A15fg44180 | putative protein strong similarity to     | unkn homeobox transcription factor, putative        | 350  | 459  | 429  | 473  | 558  | 425  | 413  | 485  | 0.85 | 0.224726 | 351  | 306  | 343  | 442  | 393  | 307  | 444  | 413  | 333  | 400  | 0.83     | 0.105040 | 391  | 0.88     | 0.319682 |
| 249087_at | A15fg44210 | DNA binding protein EREBP-3-like          | orf ERF domain protein 9 (ERF9)                     | 132  | 199  | 211  | 152  | 196  | 146  | 179  | 165  | 1.09 | 0.641555 | 165  | 155  | 155  | 156  | 127  | 121  | 123  | 132  | 159  | 132  | 1.20     | 0.243777 | 135  | 1.18     | 0.107183 |
| 249088_at | A15fg44230 | selenium-binding protein-like ;           | pentatricopeptide (PPR) repeat-containi             | 42   | 61   | 52   | 65   |      |      |      |      |      |          |      |      |      |      |      |      |      |      |      |      |          |          |      |          |          |

|              |           |                                           |                                             |      |      |      |      |      |      |      |      |          |          |      |      |      |      |      |      |      |          |      |      |          |          |      |          |          |
|--------------|-----------|-------------------------------------------|---------------------------------------------|------|------|------|------|------|------|------|------|----------|----------|------|------|------|------|------|------|------|----------|------|------|----------|----------|------|----------|----------|
| 2490202_at   | A15g44800 | helicase-like protein                     | chromodomain-helicase-DNA-binding fa        | 266  | 369  | 389  | 445  | 522  | 372  | 341  | 446  | 0.7      | 0.141542 | 144  | 129  | 184  | 234  | 186  | 160  | 220  | 219      | 152  | 204  | 0.75     | 0.053932 | 193  | 0.79     | 0.203947 |
| 2490201_at   | A15g44820 | putative protein similar to unknown pr    | expressed protein                           | 15   | 21   | 25   | 17   | 20   | 17   | 21   | 18   | 1.12     | 0.522326 | 25   | 37   | 31   | 18   | 17   | 19   | 23   | 18       | 31   | 19   | 1.63     | 0.004866 | 18   | 1.70     | 0.018877 |
| 2490202_s_at | A15g44830 | polygalacturonase-like protein            | glycoside hydrolase family 28 protein / o   | 33   | 8    | 11   | 15   | 12   | 12   | 13   | 13   | 1.00     | 0.991238 | 8    | 11   | 12   | 10   | 10   | 10   | 12   | 12       | 10   | 11   | 0.97     | 0.748075 | 10   | 1.04     | 0.781614 |
| 2490203_at   | A15g44850 | putative protein strong similarity to unk | hypothetical protein                        | 40   | 58   | 61   | 60   | 51   | 60   | 51   | 58   | 0.87     | 0.308200 | 38   | 37   | 41   | 39   | 34   | 38   | 43   | 41       | 34   | 38   | 0.90     | 0.330585 | 36   | 0.93     | 0.261511 |
| 2490204_at   | A15g44860 | putative protein strong similarity to unk | expressed protein                           | 323  | 414  | 466  | 594  | 657  | 476  | 401  | 576  | 0.70     | 0.060878 | 405  | 435  | 437  | 737  | 561  | 558  | 504  | 521      | 426  | 576  | 0.74     | 0.036480 | 618  | 0.69     | 0.032707 |
| 2490205_at   | A15g44720 | putative protein contains similarity to u | myoblemum cofactor sulfatase family p       | 385  | 405  | 426  | 632  | 707  | 602  | 438  | 647  | 0.68     | 0.007240 | 392  | 373  | 464  | 598  | 571  | 513  | 446  | 454      | 410  | 516  | 0.79     | 0.056415 | 561  | 0.73     | 0.015478 |
| 2490206_at   | A15g44785 | Expressed protein ; supported by full-le  | expressed protein                           | 178  | 253  | 226  | 281  | 281  | 247  | 219  | 270  | 0.81     | 0.108735 | 149  | 154  | 180  | 241  | 176  | 172  | 196  | 199      | 161  | 197  | 0.82     | 0.089339 | 196  | 0.82     | 0.216654 |
| 2490207_at   | A15g44790 | ATP-dependent copper transporter          | su copper transporter ATPase / responsive-h | 667  | 746  | 790  | 865  | 615  | 783  | 680  | 763  | 1.13     | 0.371868 | 510  | 485  | 486  | 510  | 485  | 486  | 510  | 485      | 486  | 510  | 0.95     | 0.685482 | 457  | 0.81     | 0.454171 |
| 2490208_at   | A15g44740 | DNA-damage-inducible protein P            | su ULMUC-like DNA repair family protein     | 77   | 91   | 79   | 95   | 98   | 80   | 83   | 91   | 0.91     | 0.309112 | 62   | 56   | 70   | 86   | 74   | 61   | 91   | 81       | 63   | 78   | 0.80     | 0.082956 | 73   | 0.85     | 0.280124 |
| 2490209_at   | A15g44870 | disease resistance protein-like           | disease resistance protein (TIR-NBS-LR      | 59   | 68   | 84   | 79   | 79   | 77   | 70   | 78   | 0.90     | 0.328663 | 63   | 57   | 73   | 61   | 61   | 65   | 71   | 72       | 64   | 66   | 0.97     | 0.105098 | 62   | 1.03     | 0.734612 |
| 2490300_at   | A15g44880 | putative protein similar to unknown d     | hypothetical protein                        | 30   | 27   | 34   | 36   | 39   | 37   | 31   | 37   | 0.82     | 0.039147 | 32   | 31   | 38   | 36   | 35   | 26   | 34   | 38       | 34   | 34   | 1.01     | 0.915188 | 32   | 1.06     | 0.635229 |
| 2490301_at   | A15g44900 | putative protein contains similarity to d | disease resistance protein (TIR class), c   | 33   | 42   | 50   | 52   | 51   | 57   | 41   | 53   | 0.78     | 0.081931 | 35   | 42   | 53   | 48   | 43   | 45   | 38   | 43       | 43   | 43   | 1.00     | 0.885081 | 45   | 0.97     | 0.842659 |
| 2490303_at   | A15g44910 | putative protein contains similarity to d | Toll-Interleukin-Resistance (TIR) domain    | 32   | 38   | 39   | 31   | 41   | 31   | 35   | 34   | 1.01     | 0.898111 | 26   | 19   | 24   | 25   | 22   | 24   | 30   | 22       | 23   | 24   | 0.95     | 0.638622 | 24   | 0.99     | 0.891304 |
| 2490303_at   | A15g44920 | putative protein contains similarity to d | Toll-Interleukin-Resistance (TIR) domain    | 42   | 56   | 75   | 58   | 73   | 66   | 58   | 66   | 0.88     | 0.485101 | 37   | 41   | 43   | 49   | 34   | 37   | 50   | 48       | 41   | 44   | 0.93     | 0.517493 | 40   | 1.01     | 0.949574 |
| 2490999_at   | A15g44970 | putative protein contains similarity to h | hypothetical protein                        | 16   | 13   | 19   | 18   | 14   | 17   | 16   | 17   | 0.95     | 0.722297 | 13   | 18   | 16   | 16   | 14   | 13   | 14   | 16       | 14   | 14   | 1.09     | 0.352309 | 14   | 1.07     | 0.570885 |
| 2490000_at   | A15g44980 | putative protein contains similarity to h | F-box family protein                        | 15   | 14   | 20   | 20   | 21   | 19   | 17   | 20   | 0.83     | 0.124621 | 11   | 11   | 17   | 15   | 13   | 17   | 15   | 13       | 13   | 15   | 0.89     | 0.385116 | 15   | 0.86     | 0.395680 |
| 2490001_at   | A15g44990 | putative protein contains similarity to d | Toll-Interleukin-Resistance (TIR) domain    | 14   | 17   | 20   | 14   | 17   | 14   | 17   | 15   | 1.14     | 0.362478 | 10   | 20   | 12   | 13   | 11   | 13   | 12   | 13       | 14   | 12   | 1.13     | 0.515668 | 12   | 1.13     | 0.612121 |
| 2490771_at   | A15g50000 | putative protein similar to unknown pr    | DSS1/SEMI family protein                    | 309  | 389  | 385  | 434  | 506  | 405  | 361  | 448  | 0.81     | 0.094228 | 408  | 375  | 414  | 621  | 496  | 487  | 465  | 461      | 399  | 506  | 0.79     | 0.037862 | 535  | 0.75     | 0.038862 |
| 2490772_at   | A15g50050 | disease resistance protein-like           | disease resistance protein-related          | 36   | 113  | 107  | 130  | 133  | 101  | 105  | 121  | 0.87     | 0.229910 | 112  | 85   | 112  | 139  | 124  | 100  | 135  | 126      | 103  | 125  | 0.82     | 0.097495 | 121  | 0.85     | 0.279864 |
| 2490774_at   | A15g50060 | disease resistance protein-like           | disease resistance protein (TIR-NBS-LR      | 44   | 60   | 52   | 63   | 66   | 54   | 52   | 61   | 0.85     | 0.187511 | 49   | 44   | 51   | 64   | 45   | 43   | 56   | 48       | 48   | 51   | 0.94     | 0.577459 | 51   | 0.95     | 0.717036 |
| 2490775_at   | A15g50040 | unknown protein ; supported by cDNA       | cytochrome c8 (ATC8)                        | 209  | 454  | 407  | 212  | 296  | 159  | 356  | 223  | 1.60     | 0.190159 | 317  | 408  | 276  | 341  | 282  | 335  | 371  | 353      | 333  | 336  | 0.99     | 0.933888 | 319  | 1.04     | 0.761521 |
| 2490776_at   | A15g44930 | putative protein strong similarity to unk | exotoxin family protein                     | 49   | 66   | 70   | 73   | 93   | 76   | 62   | 80   | 0.77     | 0.101969 | 36   | 39   | 48   | 53   | 45   | 46   | 51   | 41       | 41   | 47   | 0.86     | 0.124457 | 48   | 0.85     | 0.150227 |
| 2490777_at   | A15g50020 | putative protein strong similarity to unk | expressed protein                           | 96   | 132  | 168  | 159  | 166  | 160  | 132  | 162  | 0.82     | 0.229371 | 101  | 118  | 124  | 197  | 137  | 120  | 148  | 142      | 114  | 149  | 0.77     | 0.103183 | 151  | 0.76     | 0.202860 |
| 2490778_at   | A15g50070 | putative protein contains similarity to d | disease resistance protein (TIR class), p   | 25   | 28   | 40   | 35   | 38   | 40   | 31   | 37   | 0.83     | 0.262700 | 22   | 17   | 30   | 22   | 22   | 31   | 25   | 23       | 24   | 0.95 | 0.759881 | 22       | 1.05 | 0.790370 |          |
| 2490779_at   | A15g50080 | putative protein contains similarity to d | disease resistance protein-related          | 21   | 24   | 36   | 30   | 33   | 30   | 26   | 31   | 0.83     | 0.231687 | 21   | 29   | 25   | 24   | 23   | 24   | 28   | 28       | 25   | 26   | 0.98     | 0.848191 | 24   | 1.06     | 0.581800 |
| 249880_at    | A15g50090 | putative protein similar to unknown pr    | actin-related                               | 55   | 67   | 94   | 79   | 84   | 66   | 72   | 76   | 0.94     | 0.748586 | 38   | 39   | 50   | 47   | 40   | 36   | 43   | 44       | 42   | 42   | 1.01     | 0.934171 | 41   | 1.04     | 0.786293 |
| 249881_at    | A15g5110  | regulatory protein NPR1-like; transcript  | anion repeat family protein / BTB/POZ       | 173  | 159  | 213  | 265  | 242  | 178  | 282  | 228  | 0.79     | 0.199793 | 87   | 87   | 81   | 107  | 91   | 94   | 105  | 106      | 85   | 101  | 0.84     | 0.015603 | 97   | 0.87     | 0.076305 |
| 249882_at    | A15g5120  | chloroplast nucleoid DNA-binding prote    | aspartyl protease family protein            | 32   | 52   | 60   | 55   | 63   | 54   | 66   | 48   | 0.45     | 0.235673 | 34   | 34   | 34   | 40   | 32   | 34   | 38   | 39       | 38   | 1.01 | 0.853933 | 35       | 1.09 | 0.487205 |          |
| 249883_at    | A15g5130  | non-related GTP-binding protein RH41      | / Ras-related protein (RH41) / small GTP-   | 1377 | 1813 | 2053 | 2267 | 1746 | 1648 | 2021 | 0.89 | 0.193221 | 1496     | 1507 | 1414 | 2127 | 1813 | 1678 | 1763 | 1473 | 1849     | 1813 | 0.82 | 0.226585 | 1849     | 0.81 | 0.096863 |          |
| 249884_at    | A15g5140  | DNA-directed RNA polymerase subunit       | DNA-directed RNA polymerase, putative       | 161  | 238  | 214  | 258  | 295  | 221  | 204  | 258  | 0.79     | 0.159903 | 128  | 101  | 136  | 163  | 143  | 122  | 144  | 122      | 142  | 143  | 0.85     | 0.120425 | 143  | 0.86     | 0.261681 |
| 249885_at    | A15g5160  | GTP-binding protein similar to; root har  | defective 3 GTP-binding (RHD)               | 259  | 309  | 341  | 319  | 362  | 279  | 303  | 320  | 0.95     | 0.640958 | 209  | 181  | 238  | 283  | 253  | 205  | 237  | 248      | 210  | 245  | 0.85     | 0.136727 | 247  | 0.85     | 0.255039 |
| 249886_at    | A15g5170  | putative protein similar to unknown d     | Cbcr1 protein-related                       | 298  | 419  | 375  | 468  | 529  | 406  | 364  | 467  | 0.78     | 0.107643 | 374  | 364  | 396  | 604  | 488  | 422  | 453  | 468      | 378  | 487  | 0.78     | 0.041536 | 504  | 0.75     | 0.079867 |
| 249887_at    | A15g5180  | dimethylallene monooxygenase (N-ox        | Ravin-catalyzed monooxygenase fami          | 24   | 32   | 36   | 28   | 33   | 31   | 31   | 36   | 0.86     | 0.318352 | 24   | 35   | 24   | 26   | 24   | 26   | 24   | 23       | 22   | 24   | 0.99     | 0.805366 | 25   | 0.96     | 0.162849 |
| 249888_at    | A15g5190  | putative protein contains similarity to   | cyt c family protein                        | 268  | 373  | 359  | 367  | 395  | 334  | 333  | 365  | 0.91     | 0.437570 | 269  | 234  | 297  | 368  | 297  | 253  | 351  | 319      | 266  | 318  | 0.84     | 0.142538 | 306  | 0.87     | 0.360022 |
| 249889_at    | A15g5200  | disease resistance protein RPS4           | disease resistance protein (TIR-NBS-LR      | 14   | 17   | 19   | 18   | 22   | 20   | 16   | 20   | 0.81     | 0.118368 | 14   | 18   | 19   | 21   | 18   | 17   | 26   | 18       | 17   | 26   | 0.87     | 0.353736 | 19   | 0.94     | 0.579249 |
| 249890_at    | A15g5210  | disease resistance protein-like           | disease resistance protein (TIR-NBS-LR      | 23   | 21   | 33   | 29   | 32   | 28   | 26   | 29   | 0.88     | 0.402170 | 22   | 27   | 26   | 25   | 24   | 22   | 34   | 24       | 25   | 26   | 0.98     | 0.889166 | 23   | 1.07     | 0.377662 |
| 249891_at    | A15g5220  | putative protein contains similarity to d | Toll-Interleukin-Resistance (TIR) domain    | 42   | 47   | 53   | 46   | 49   | 44   | 47   | 47   | 1.02     | 0.849708 | 49   | 43   | 56   | 38   | 43   | 41   | 47   | 40       | 49   | 42   | 1.19     | 0.472203 | 49   | 1.22     | 0.605661 |
| 249892_at    | A15g5230  | disease resistance protein RPS4           | disease resistance protein (TIR-NBS-LR      | 20   | 19   | 26   | 27   | 29   | 23   | 22   | 26   | 0.82     | 0.157628 | 20   | 22   | 16   | 18   | 14   | 13   | 15   | 17       | 19   | 15   | 1.26     | 0.066514 | 15   | 1.29     | 0.147570 |
| 249893_at    | A15g5240  | putative protein contains similarity to d | disease resistance protein (TIR-NBS-LR      | 245  | 319  | 37   | 39   | 36   | 32   | 37   | 0.85 | 0.296139 | 32       | 33   | 39   | 32   | 25   | 30   | 36   | 37   | 35       | 32   | 1.08 | 0.492340 | 29       | 1.20 | 0.140454 |          |
| 249894_at    | A15g5250  | disease resistance protein-like           | disease resistance protein (TIR-NBS-LR      | 47   | 62   | 63   | 59   | 70   | 45   | 57   | 58   | 0.99     | 0.944064 | 50   | 38   | 47   | 54   | 47   | 54   | 47   | 59       | 52   | 45   | 0.90     | 0.315369 | 47   | 0.95     | 0.706973 |
| 249895_at    | A15g5260  | disease resistance protein-like           | disease resistance protein (TIR-NBS-LR      | 68   | 71   | 86   | 71   | 86   | 71   | 61   | 82   | 0.74     | 0.072355 | 54   | 71   | 63   | 54   | 50   | 40   | 53   | 51       | 38   | 50   | 0.76     | 0.020519 | 48   | 0.78     | 0.100809 |
| 249896_at    | A15g5270  | unknown protein                           | WRKY family transcription factor            | 59   | 79   | 92   | 104  | 118  | 102  | 79   | 108  | 0.73     | 0.035572 | 59   | 58   | 56   | 85   | 72   | 69   | 80   | 0.075449 | 73   | 69   | 0.80     | 0.075449 | 73   | 0.80     | 0.226865 |
| 249897_at    | A15g5300  | beta-amylase-like protein                 | glycosyl hydrolase family 14 protein        | 139  | 160  | 171  | 176  | 200  | 157  | 157  | 178  | 0.88     | 0.248321 | 132  | 120  | 144  | 179  | 154  | 137  | 179  | 164      | 132  | 163  | 0.81     | 0.038617 | 157  | 0.84     | 0.146431 |
| 249898_at    | A15g5320  | unknown protein                           | expressed protein                           | 43   | 58   | 73   | 113  | 123  | 102  | 58   | 113  | 0.51     | 0.008615 | 101  | 117  | 113  | 170  | 131  | 119  | 130  | 134      | 110  | 138  | 0.80     | 0.088626 | 142  | 0.78     | 0.152610 |
| 249899_at    | A15g5340  | cytochrome P450                           | cytochrome P450 family protein              | 165  | 82   | 176  | 151  | 160  | 127  | 141  | 146  | 0.97     | 0.885835 | 83   | 90   | 70   | 100  | 73   | 78   | 109  | 101      | 81   | 92   | 0.88     | 0.329344 | 84   | 0.97     | 0.825004 |
| 249900_at    | A15g5370  | nodulin-like protein                      | nodulin-related / internal membrane fam     | 108  | 122  | 133  | 163  | 167  | 126  | 122  | 133  | 0.62     | 0.098942 | 112  | 112  | 106  | 143  | 129  | 137  | 126  | 143      | 129  | 137  | 0.81     | 0.027458 | 145  | 0.81     | 0.056965 |
| 249901_at    | A15g5380  | unknown protein ; supported by full-len   | F-box family protein                        | 292  | 421  | 481  | 430  | 475  | 373  | 398  | 426  | 0.93     | 0.677829 | 321  | 397  | 351  | 537  | 399  | 379  | 419  | 420      | 356  | 431  | 0.83     | 0.112102 | 439  | 0.81     | 0.204744 |
| 249902_at    | A15g5390  | unknown protein ; supported by full-len   | proline-rich family protein</               |      |      |      |      |      |      |      |      |          |          |      |      |      |      |      |      |      |          |      |      |          |          |      |          |          |

|           |            |                                                                                     |      |      |      |      |      |      |      |      |          |          |      |      |      |      |      |      |      |      |         |      |          |          |          |          |          |          |
|-----------|------------|-------------------------------------------------------------------------------------|------|------|------|------|------|------|------|------|----------|----------|------|------|------|------|------|------|------|------|---------|------|----------|----------|----------|----------|----------|----------|
| 248926_at | A15fg45880 | Ole e l (main olive allergen)-like protein pollen Ole e 1 allergen and extensin fam | 374  | 229  | 284  | 160  | 206  | 91   | 296  | 152  | 1.94     | 0.056197 | 126  | 153  | 133  | 82   | 59   | 106  | 58   | 64   | 137     | 74   | 1.86     | 0.003439 | 83       | 1.66     | 0.025704 |          |
| 248927_at | A15fg45900 | ubiquitin activating enzyme E1-like proct polypep 7 (APG7)                          | 370  | 207  | 245  | 275  | 283  | 214  | 214  | 257  | 0.83     | 0.184865 | 210  | 187  | 201  | 279  | 244  | 205  | 282  | 261  | 199     | 254  | 0.78     | 0.028995 | 243      | 0.82     | 0.121687 |          |
| 248928_at | A15fg45970 | Rac-like eto bindina protein ARAC2 (ac Rac-like GTP-binding protein (ARAC2)         | 21   | 24   | 28   | 29   | 31   | 22   | 24   | 27   | 0.88     | 0.392689 | 17   | 16   | 24   | 27   | 22   | 18   | 22   | 20   | 19      | 22   | 0.87     | 0.308663 | 22       | 0.86     | 0.412424 |          |
| 248929_at | A15fg46000 | mosaic-like protein-like: isamr                                                     | 33   | 42   | 32   | 33   | 35   | 31   | 33   | 33   | 0.95     | 0.691566 | 29   | 32   | 38   | 39   | 28   | 35   | 19   | 32   | 32      | 27   | 1.18     | 0.288476 | 24       | 1.02     | 0.019289 |          |
| 248930_at | A15fg46010 | unknown protein                                                                     | 14   | 17   | 17   | 18   | 21   | 19   | 16   | 19   | 0.83     | 0.075669 | 22   | 17   | 19   | 20   | 19   | 21   | 21   | 23   | 16      | 19   | 20       | 0.97     | 0.754555 | 20       | 0.95     | 0.560370 |
| 248931_at | A15fg46040 | peptide transporter                                                                 | 28   | 28   | 40   | 45   | 39   | 30   | 32   | 38   | 0.85     | 0.388891 | 36   | 37   | 38   | 29   | 24   | 30   | 25   | 25   | 37      | 26   | 1.39     | 0.000779 | 27       | 1.34     | 0.008920 |          |
| 248932_at | A15fg46050 | putative protein                                                                    | 25   | 33   | 36   | 55   | 49   | 37   | 31   | 47   | 0.86     | 0.070387 | 25   | 25   | 32   | 35   | 29   | 29   | 33   | 35   | 30      | 27   | 32       | 0.84     | 0.078951 | 32       | 0.84     | 0.150579 |
| 248933_at | A15fg46050 | putative protein similar to alpha                                                   | 3325 | 3205 | 3205 | 3209 | 3209 | 2421 | 2421 | 2421 | 0.95     | 0.309121 | 236  | 276  | 271  | 236  | 205  | 177  | 205  | 193  | 208     | 177  | 0.95     | 0.548312 | 208      | 0.94     | 0.048544 |          |
| 248934_at | A15fg46080 | serine/threonine protein kinase-like or                                             | 28   | 33   | 36   | 41   | 35   | 34   | 32   | 37   | 0.88     | 0.257024 | 38   | 26   | 38   | 46   | 34   | 35   | 37   | 36   | 34      | 38   | 0.90     | 0.397679 | 39       | 0.88     | 0.461613 |          |
| 248935_at | A15fg46100 | salt-inducible protein-like                                                         | 46   | 50   | 67   | 66   | 64   | 62   | 54   | 64   | 0.86     | 0.241968 | 29   | 27   | 34   | 32   | 27   | 31   | 38   | 29   | 30      | 31   | 0.96     | 0.644345 | 30       | 1.00     | 0.993103 |          |
| 248876_at | A15fg46120 | outative protein similar to unknown d                                               | 5    | 9    | 8    | 7    | 9    | 8    | 8    | 0.96 | 0.832102 | 6        | 9    | 9    | 7    | 6    | 7    | 9    | 6    | 8    | 7       | 1.14 | 0.373934 | 7        | 1.19     | 0.296504 |          |          |
| 248877_at | A15fg46140 | outative protein similar to unknown d                                               | 30   | 41   | 36   | 38   | 43   | 38   | 36   | 40   | 0.90     | 0.331561 | 32   | 32   | 32   | 36   | 28   | 30   | 46   | 28   | 32      | 34   | 0.95     | 0.700664 | 32       | 1.32     | 0.870617 |          |
| 248878_at | A15fg46160 | 50S ribosomal protein L14                                                           | 38   | 43   | 40   | 26   | 17   | 21   | 39   | 21   | 1.84     | 0.105817 | 42   | 45   | 42   | 16   | 14   | 14   | 16   | 12   | 43      | 14   | 2.96     | 0.000001 | 15       | 2.90     | 0.000017 |          |
| 248879_at | A15fg46180 | ornithine aminotransferase                                                          | 85   | 135  | 146  | 116  | 131  | 83   | 122  | 110  | 1.11     | 0.641627 | 100  | 118  | 99   | 142  | 108  | 102  | 125  | 124  | 106     | 120  | 0.88     | 0.195016 | 118      | 0.90     | 0.427348 |          |
| 248880_at | A15fg46200 | putative protein contains similarity to                                             | 29   | 29   | 44   | 34   | 36   | 33   | 34   | 34   | 0.99     | 0.951751 | 23   | 26   | 34   | 24   | 18   | 25   | 25   | 25   | 28      | 23   | 1.18     | 0.193750 | 22       | 1.23     | 0.238260 |          |
| 248881_at | A15fg46020 | unknown protein                                                                     | 1233 | 1582 | 1629 | 1539 | 1712 | 1393 | 1482 | 1548 | 0.96     | 0.691041 | 1219 | 1328 | 1420 | 1735 | 1449 | 1355 | 1493 | 1517 | 1322    | 1510 | 0.88     | 0.092372 | 1513     | 0.87     | 0.210371 |          |
| 248882_at | A15fg46210 | disease resistance protein-like                                                     | 332  | 432  | 775  | 830  | 971  | 718  | 749  | 840  | 0.95     | 0.382468 | 689  | 537  | 684  | 775  | 707  | 608  | 701  | 665  | 637     | 691  | 0.92     | 0.331992 | 697      | 0.91     | 0.437358 |          |
| 248883_at | A15fg46190 | outative protein strong similarity to                                               | 118  | 160  | 150  | 173  | 190  | 137  | 143  | 167  | 0.86     | 0.305209 | 124  | 97   | 131  | 142  | 129  | 109  | 157  | 143  | 117     | 136  | 0.86     | 0.203263 | 127      | 0.92     | 0.537914 |          |
| 248884_at | A15fg46030 | putative protein similar to unknown                                                 | 731  | 915  | 1040 | 1197 | 1266 | 1082 | 895  | 1182 | 0.76     | 0.052011 | 979  | 1071 | 1129 | 1476 | 1274 | 1067 | 1163 | 1157 | 1059    | 1227 | 0.86     | 0.140993 | 1272     | 0.83     | 0.166219 |          |
| 248885_at | A15fg46150 | putative protein similar to unknown                                                 | 132  | 206  | 211  | 189  | 228  | 173  | 183  | 197  | 0.93     | 0.671173 | 180  | 220  | 217  | 294  | 240  | 232  | 256  | 234  | 206     | 251  | 0.82     | 0.045021 | 255      | 0.80     | 0.101404 |          |
| 248886_at | A15fg46110 | phosphate/fructose-phosphate translocat                                             | 1194 | 1859 | 1566 | 1597 | 1899 | 1102 | 1540 | 1533 | 1.00     | 0.982928 | 1511 | 1560 | 1466 | 1907 | 1631 | 1653 | 1548 | 1595 | 1512    | 1695 | 0.90     | 0.162239 | 1761     | 0.86     | 0.110413 |          |
| 248887_at | A15fg46115 | Expressed protein ; supported by full-                                              | 15   | 21   | 25   | 32   | 31   | 25   | 20   | 29   | 0.69     | 0.064866 | 23   | 21   | 23   | 44   | 29   | 31   | 40   | 32   | 22      | 35   | 0.64     | 0.018147 | 35       | 0.65     | 0.086358 |          |
| 248888_at | A15fg46240 | otassium channel protein KAT1 (Kir1.5                                               | 23   | 18   | 26   | 27   | 37   | 29   | 22   | 31   | 0.72     | 0.090132 | 17   | 15   | 12   | 31   | 21   | 19   | 11   | 14   | 12      | 15   | 0.78     | 0.411438 | 24       | 0.63     | 0.091563 |          |
| 248889_at | A15fg46230 | unknown protein ; supported by full-len                                             | 9    | 11   | 12   | 8    | 10   | 9    | 10   | 0.94 | 0.628983 | 8        | 8    | 7    | 11   | 12   | 8    | 12   | 8    | 12   | 8       | 10   | 0.76     | 0.087107 | 10       | 0.76     | 0.078698 |          |
| 248890_at | A15fg46270 | disease resistance protein-like                                                     | 13   | 14   | 16   | 17   | 18   | 21   | 14   | 18   | 0.76     | 0.041506 | 16   | 14   | 19   | 19   | 19   | 13   | 24   | 13   | 16      | 18   | 0.33     | 0.686575 | 17       | 0.96     | 0.172783 |          |
| 248891_at | A15fg46280 | MCM3 homolog (embC/AQ03887.1)                                                       | 406  | 412  | 374  | 522  | 478  | 444  | 397  | 481  | 0.83     | 0.029955 | 311  | 249  | 367  | 430  | 378  | 276  | 318  | 310  | 309     | 342  | 0.90     | 0.481631 | 361      | 0.86     | 0.411560 |          |
| 248892_at | A15fg46300 | unknown protein                                                                     | 38   | 61   | 86   | 4    | 7    | 5    | 62   | 5    | 11.77    | 0.014887 | 107  | 130  | 134  | 4    | 6    | 7    | 5    | 6    | 124     | 5    | 23.09    | 0.000001 | 6        | 22.36    | 0.000150 |          |
| 248893_at | A15fg46310 | unknown protein                                                                     | 34   | 37   | 45   | 44   | 45   | 45   | 39   | 45   | 0.87     | 0.152033 | 32   | 35   | 31   | 35   | 27   | 35   | 36   | 29   | 33      | 33   | 1.01     | 0.918910 | 33       | 1.01     | 0.942729 |          |
| 248894_at | A15fg46320 | unknown protein                                                                     | 28   | 38   | 70   | 49   | 49   | 66   | 45   | 55   | 0.82     | 0.527529 | 18   | 33   | 30   | 29   | 21   | 27   | 35   | 30   | 27      | 28   | 0.95     | 0.784585 | 26       | 1.06     | 0.796360 |          |
| 248895_at | A15fg46350 | receptor protein kinase                                                             | 81   | 115  | 108  | 116  | 112  | 108  | 87   | 116  | 0.71     | 0.051363 | 104  | 124  | 133  | 106  | 107  | 123  | 106  | 107  | 123     | 106  | 1.02     | 0.144448 | 107      | 1.02     | 0.856343 |          |
| 248896_at | A15fg46350 | putative protein contains similarity to                                             | 32   | 35   | 27   | 29   | 31   | 32   | 31   | 31   | 1.02     | 0.779784 | 24   | 29   | 41   | 65   | 29   | 17   | 36   | 32   | 31      | 36   | 0.88     | 0.710999 | 37       | 0.85     | 0.736125 |          |
| 248897_at | A15fg46360 | KCO-like protein 3 (embC/CAB40380.1                                                 | 42   | 50   | 63   | 64   | 79   | 62   | 52   | 68   | 0.76     | 0.113547 | 37   | 36   | 43   | 33   | 32   | 38   | 50   | 44   | 39      | 39   | 0.99     | 0.936393 | 34       | 1.13     | 0.199449 |          |
| 248898_at | A15fg46370 | outward rectifying potassium channel                                                | 12   | 10   | 15   | 19   | 12   | 15   | 12   | 15   | 0.81     | 0.297135 | 11   | 9    | 14   | 12   | 10   | 13   | 15   | 15   | 13      | 13   | 0.84     | 0.262425 | 12       | 0.95     | 0.723402 |          |
| 248899_at | A15fg46390 | carboxy-terminal proteinase D1-like or                                              | 87   | 123  | 146  | 142  | 158  | 134  | 120  | 141  | 0.85     | 0.332713 | 78   | 83   | 106  | 129  | 102  | 101  | 117  | 102  | 89      | 101  | 0.81     | 0.069272 | 111      | 0.80     | 0.196406 |          |
| 248900_at | A15fg46400 | outative protein strong similarity to                                               | 74   | 86   | 96   | 90   | 101  | 74   | 85   | 88   | 0.97     | 0.781119 | 59   | 65   | 66   | 88   | 72   | 58   | 83   | 76   | 64      | 76   | 0.84     | 0.136398 | 73       | 0.87     | 0.351239 |          |
| 248901_at | A15fg46410 | putative protein contains similarity to                                             | 178  | 279  | 344  | 253  | 306  | 211  | 267  | 257  | 1.04     | 0.859377 | 159  | 164  | 161  | 176  | 148  | 148  | 229  | 206  | 161     | 181  | 0.89     | 0.382043 | 157      | 1.02     | 0.703891 |          |
| 248902_at | A15fg46440 | unknown protein                                                                     | 20   | 22   | 28   | 25   | 22   | 27   | 23   | 25   | 0.94     | 0.619714 | 19   | 20   | 21   | 18   | 15   | 15   | 19   | 18   | 20      | 17   | 1.18     | 0.033632 | 16       | 1.25     | 0.025961 |          |
| 248903_at | A15fg46290 | 3-oxoacyl-(acyl-carrier-protein) synthet                                            | 626  | 741  | 697  | 972  | 666  | 671  | 897  | 0.75 | 0.058306 | 653      | 601  | 711  | 1112 | 835  | 703  | 733  | 768  | 658  | 839     | 0.78 | 0.110282 | 962      | 0.73     | 0.029436 |          |          |
| 248904_at | A15fg46295 | Expressed protein ; supported by full-                                              | 35   | 30   | 57   | 23   | 43   | 35   | 41   | 34   | 1.21     | 0.526792 | 17   | 16   | 15   | 19   | 11   | 14   | 16   | 20   | 16      | 16   | 1.01     | 0.931735 | 15       | 1.11     | 0.534935 |          |
| 248905_at | A15fg46250 | outative protein contains similarity to                                             | 198  | 289  | 340  | 267  | 335  | 253  | 276  | 285  | 0.97     | 0.857570 | 242  | 258  | 258  | 329  | 249  | 255  | 289  | 295  | 253     | 289  | 0.88     | 0.062412 | 287      | 0.88     | 0.187446 |          |
| 248906_at | A15fg46420 | outative protein similar to unknown d                                               | 216  | 332  | 285  | 284  | 307  | 250  | 278  | 280  | 0.99     | 0.944587 | 208  | 169  | 190  | 246  | 223  | 178  | 266  | 220  | 183     | 227  | 0.83     | 0.124666 | 217      | 0.87     | 0.302247 |          |
| 248907_at | A15fg46340 | outative protein contains similarity to                                             | 178  | 207  | 237  | 260  | 271  | 206  | 208  | 246  | 0.85     | 0.223918 | 171  | 143  | 175  | 215  | 198  | 165  | 198  | 169  | 163     | 193  | 0.84     | 0.084932 | 193      | 0.84     | 0.173466 |          |
| 248908_at | A15fg46450 | disease resistance protein-like                                                     | 29   | 34   | 34   | 33   | 30   | 35   | 38   | 35   | 0.85     | 0.015811 | 25   | 23   | 26   | 27   | 25   | 25   | 26   | 25   | 25      | 26   | 0.98     | 0.687819 | 25       | 0.98     | 0.819899 |          |
| 248909_at | A15fg46460 | putative protein strong similarity to                                               | 63   | 77   | 92   | 89   | 103  | 82   | 77   | 91   | 0.85     | 0.246331 | 63   | 49   | 78   | 67   | 62   | 64   | 62   | 60   | 63      | 63   | 1.01     | 0.957325 | 64       | 0.98     | 0.909547 |          |
| 248910_at | A15fg46470 | disease resistance protein-like                                                     | 17   | 20   | 25   | 28   | 31   | 22   | 20   | 27   | 0.77     | 0.146109 | 14   | 24   | 15   | 16   | 14   | 17   | 13   | 14   | 18      | 15   | 1.19     | 0.317941 | 16       | 1.13     | 0.595395 |          |
| 248911_at | A15fg46480 | disease resistance protein-like                                                     | 82   | 88   | 130  | 117  | 122  | 105  | 100  | 115  | 0.87     | 0.404227 | 56   | 54   | 64   | 74   | 62   | 58   | 73   | 68   | 58      | 67   | 0.87     | 0.112424 | 65       | 0.90     | 0.320097 |          |
| 248912_at | A15fg46500 | outative protein similar to unknown                                                 | 5    | 5    | 5    | 5    | 5    | 5    | 5    | 5    | 0.94     | 0.514080 | 6    | 5    | 5    | 5    | 5    | 5    | 5    | 5    | 5       | 5    | 1.17     | 0.513238 | 5        | 1.12     | 0.766568 |          |
| 248913_at | A15fg46510 | disease resistance protein-like                                                     | 14   | 14   | 17   | 16   | 16   | 18   | 15   | 17   | 0.89     | 0.207640 | 10   | 9    | 11   | 13   | 11   | 10   | 16   | 11   | 10      | 12   | 0.83     | 0.189372 | 11       | 0.90     | 0.291604 |          |
| 248914_at | A15fg46520 | disease resistance protein-like                                                     | 6    | 6    | 4    | 4    | 9    | 6    | 5    | 6    | 0.87     | 0.588974 | 3    | 5    | 5    | 2    | 3    | 5    | 10   | 3    | 4       | 5    | 0.92     | 0.848974 | 3        | 1.27     | 0.414476 |          |
| 248915_at | A15fg46540 | multidrug resistance p-glycoprotein                                                 | 30   | 29   | 49   | 55   | 44   | 33   | 49   | 67   | 0.87     | 0.024038 | 31   | 27   | 32   | 46   | 34   | 50   | 41   | 72   | 0.36851 | 38   | 0.78     | 0.1016   |          |          |          |          |

|           |           |                                                                                      |      |      |      |      |      |      |      |      |          |          |      |      |      |      |      |      |      |      |      |      |          |          |      |          |          |
|-----------|-----------|--------------------------------------------------------------------------------------|------|------|------|------|------|------|------|------|----------|----------|------|------|------|------|------|------|------|------|------|------|----------|----------|------|----------|----------|
| 248831_at | A15g47160 | putative protein contains similarity to St YDG/SRA domain-containing protein         | 110  | 168  | 138  | 162  | 199  | 137  | 139  | 166  | 0.84     | 0.328349 | 118  | 103  | 124  | 174  | 152  | 139  | 141  | 115  | 148  | 0.78 | 0.022431 | 155      | 0.74 | 0.029249 |          |
| 248832_at | A15g47170 | putative protein similar to unknown pro hypothetical protein                         | 43   | 41   | 45   | 40   | 50   | 42   | 43   | 44   | 0.97     | 0.763313 | 36   | 32   | 45   | 40   | 39   | 35   | 39   | 37   | 38   | 0.99 | 0.864372 | 38       | 0.99 | 0.918842 |          |
| 248833_at | A15g47200 | Bax inhibitor-1-like : supported by full-le Box inhibitor-1 putative / BI-1 putative | 942  | 1150 | 1218 | 1389 | 1703 | 1150 | 1103 | 1414 | 0.78     | 0.160122 | 1117 | 1122 | 1070 | 1521 | 1198 | 1228 | 1187 | 1111 | 1103 | 1249 | 0.88     | 0.175280 | 1316 | 0.84     | 0.111273 |
| 248834_at | A15g47210 | unknown protein : supported by full-len disease resistance protein (CC-NBS-LR        | 50   | 64   | 77   | 90   | 89   | 80   | 63   | 87   | 0.73     | 0.051749 | 56   | 52   | 63   | 74   | 55   | 51   | 61   | 62   | 57   | 61   | 0.94     | 0.531048 | 60   | 0.95     | 0.703722 |
| 248835_at | A15g47250 | NBSLRR disease resistance protein                                                    | 26   | 31   | 42   | 35   | 37   | 38   | 33   | 37   | 0.89     | 0.427967 | 27   | 32   | 32   | 33   | 32   | 30   | 38   | 29   | 31   | 32   | 0.94     | 0.466266 | 32   | 0.96     | 0.577906 |
| 248837_at | A15g47270 | putative protein similar to unknown pro disease resistance protein-related           | 12   | 17   | 18   | 17   | 13   | 14   | 16   | 15   | 1.06     | 0.724256 | 12   | 12   | 18   | 14   | 13   | 14   | 18   | 15   | 14   | 14   | 0.96     | 0.802790 | 13   | 1.07     | 0.714218 |
| 248840_at | A15g47280 | disease resistance protein-like                                                      | 13   | 15   | 17   | 17   | 17   | 14   | 19   | 0.74 | 0.07789  | 13       | 14   | 15   | 14   | 12   | 15   | 14   | 15   | 14   | 14   | 1.07 | 0.492328 | 14       | 1.14 | 0.059486 |          |
| 248841_at | A15g47310 | outative protein contains similarity to Et expressed protein                         | 414  | 512  | 456  | 565  | 563  | 456  | 641  | 528  | 0.87     | 0.216473 | 497  | 480  | 547  | 763  | 575  | 518  | 538  | 522  | 508  | 583  | 0.87     | 0.278441 | 619  | 0.82     | 0.223350 |
| 248812_at | A15g47330 | calmivov-protein thioesterase orecurso calmiotv-protein thioesterase family ord      | 49   | 64   | 76   | 85   | 76   | 63   | 78   | 0.80 | 0.143704 | 178      | 218  | 213  | 43   | 40   | 33   | 48   | 50   | 203  | 43   | 4.73 | 0.000004 | 39       | 5.25 | 0.000230 |          |
| 248782_at | A15g47340 | calmivov-protein thioesterase orecurso calmiotv-protein thioesterase family ord      | 33   | 42   | 41   | 43   | 33   | 36   | 39   | 0.92 | 0.497924 | 49       | 42   | 48   | 50   | 56   | 44   | 48   | 39   | 46   | 47   | 0.97 | 0.767877 | 50       | 0.92 | 0.398844 |          |
| 248783_at | A15g47360 | outative protein contains similarity to sa centariocetocidote (PPR) repeat-containi  | 32   | 121  | 122  | 125  | 146  | 118  | 115  | 0.89 | 0.367091 | 95       | 98   | 94   | 147  | 114  | 116  | 116  | 95   | 121  | 79   | 0.79 | 0.021729 | 125      | 0.76 | 0.050677 |          |
| 248784_at | A15g47380 | putative protein similar to unknown pro expressed protein                            | 220  | 235  | 247  | 172  | 186  | 163  | 234  | 174  | 1.35     | 0.004401 | 267  | 261  | 302  | 244  | 174  | 168  | 201  | 214  | 276  | 1.38 | 0.010044 | 214      | 1.07 | 0.041771 |          |
| 248785_at | A15g47400 | unknown protein                                                                      | 84   | 102  | 106  | 123  | 125  | 100  | 98   | 116  | 0.84     | 0.146383 | 56   | 58   | 67   | 71   | 60   | 56   | 64   | 56   | 60   | 0.98 | 0.843085 | 62       | 0.97 | 0.770302 |          |
| 248786_at | A15g47410 | unknown protein                                                                      | 210  | 281  | 300  | 262  | 286  | 249  | 264  | 266  | 0.99     | 0.946675 | 173  | 144  | 196  | 214  | 187  | 147  | 238  | 222  | 171  | 202  | 0.85     | 0.245514 | 183  | 0.93     | 0.652590 |
| 248787_at | A15g47420 | outative protein similar to unknown ord expressed protein                            | 221  | 264  | 252  | 345  | 346  | 271  | 246  | 321  | 0.77     | 0.056430 | 302  | 326  | 361  | 506  | 352  | 310  | 318  | 317  | 330  | 360  | 0.91     | 0.567168 | 389  | 0.85     | 0.390044 |
| 248788_at | A15g47430 | outative protein similar to unknown ord expressed protein                            | 97   | 119  | 115  | 127  | 93   | 111  | 120  | 0.92 | 0.573440 | 85       | 82   | 83   | 105  | 83   | 77   | 86   | 81   | 83   | 86   | 0.96 | 0.614467 | 89       | 0.94 | 0.552046 |          |
| 248789_at | A15g47440 | outative protein strons similarity to unk expressed protein                          | 32   | 38   | 40   | 42   | 51   | 35   | 37   | 43   | 0.86     | 0.326115 | 20   | 35   | 31   | 34   | 29   | 31   | 38   | 28   | 29   | 32   | 0.91     | 0.489559 | 31   | 0.93     | 0.653159 |
| 248790_at | A15g47450 | membrane channel protein-like; aquap major intrinsic family protein / MIP family     | 25   | 30   | 40   | 33   | 36   | 28   | 31   | 32   | 0.97     | 0.868672 | 28   | 31   | 29   | 23   | 24   | 25   | 29   | 20   | 29   | 24   | 1.20     | 0.052884 | 24   | 1.22     | 0.016742 |
| 248791_at | A15g47350 | palmitoyl-protein thioesterase precursu palmitoyl-protein thioesterase family ord    | 130  | 207  | 239  | 80   | 51   | 62   | 212  | 65   | 3.29     | 0.040644 | 1065 | 1219 | 1216 | 366  | 254  | 215  | 319  | 302  | 1167 | 291  | 4.01     | 0.003003 | 278  | 4.19     | 0.000202 |
| 248792_at | A15g47200 | Ras-related small GTP-binding protein-I Ras-related GTP-binding protein, putati      | 1101 | 1146 | 1249 | 1428 | 1513 | 1285 | 1165 | 1409 | 0.83     | 0.037766 | 1068 | 1150 | 1204 | 1600 | 1317 | 1121 | 1301 | 1281 | 1141 | 1324 | 0.86     | 0.136761 | 1346 | 0.85     | 0.226971 |
| 248793_at | A15g47240 | muTf domain protein-like : supported b MuTf/nudix family protein                     | 66   | 82   | 106  | 163  | 189  | 151  | 85   | 168  | 0.51     | 0.006892 | 166  | 131  | 182  | 356  | 446  | 333  | 544  | 545  | 160  | 445  | 0.36     | 0.003376 | 378  | 0.42     | 0.004345 |
| 248794_at | A15g47220 | ethvlene responsive element bindino fa ethvlene-resonsive element-bindino fac        | 29   | 43   | 51   | 43   | 48   | 43   | 41   | 45   | 0.92     | 0.612438 | 30   | 37   | 40   | 38   | 45   | 32   | 58   | 53   | 36   | 45   | 0.79     | 0.194045 | 38   | 0.93     | 0.580967 |
| 248795_at | A15g47390 | Mv-related transcrioption activator-like myb family transcription factor             | 287  | 387  | 429  | 313  | 383  | 269  | 368  | 322  | 1.14     | 0.437951 | 427  | 454  | 428  | 491  | 415  | 386  | 478  | 478  | 436  | 449  | 0.97     | 0.668695 | 431  | 1.01     | 0.864583 |
| 248796_at | A15g47180 | VAMP (vesicle-associated membrane r vesicle-associated membrane family ord           | 345  | 384  | 503  | 423  | 444  | 352  | 411  | 407  | 1.01     | 0.942606 | 452  | 500  | 441  | 613  | 495  | 476  | 572  | 539  | 464  | 539  | 0.86     | 0.082213 | 528  | 0.88     | 0.243183 |
| 248797_at | A15g47210 | putative protein similar to unknown proT nuclear RNA-binding protein, putative       | 2495 | 2757 | 2815 | 2967 | 3283 | 2749 | 2689 | 3000 | 0.99     | 0.166239 | 2185 | 1908 | 2477 | 2932 | 2598 | 2315 | 2566 | 2685 | 2210 | 2579 | 0.86     | 0.053160 | 2581 | 0.86     | 0.152334 |
| 248798_at | A15g47190 | putative protein contains similarity to pl. ribosomal protein L19 family protein     | 190  | 301  | 264  | 267  | 270  | 230  | 252  | 256  | 0.98     | 0.916296 | 277  | 369  | 314  | 442  | 296  | 307  | 349  | 310  | 320  | 341  | 0.94     | 0.634535 | 348  | 0.92     | 0.632469 |
| 248799_at | A15g47230 | ethvlene responsive element bindino fa ethvlene-resonsive element-bindino fac        | 66   | 56   | 56   | 99   | 103  | 72   | 59   | 91   | 0.65     | 0.035257 | 46   | 42   | 41   | 46   | 44   | 42   | 63   | 61   | 43   | 51   | 0.84     | 0.224641 | 44   | 0.98     | 0.630518 |
| 248800_at | A15g47320 | 40S ribosomal protein S19 : supported 30S ribosomal protein S19, mitochondri         | 505  | 625  | 661  | 770  | 812  | 620  | 597  | 734  | 0.81     | 0.142650 | 659  | 687  | 690  | 1126 | 795  | 767  | 746  | 726  | 679  | 838  | 0.81     | 0.154882 | 906  | 0.75     | 0.106899 |
| 248801_at | A15g47330 | homoeo-leusine zinc finger protein-1 : homoeo-leusine zinc finger protein 2 (HAT     | 281  | 308  | 308  | 308  | 284  | 305  | 314  | 319  | 0.99     | 0.813471 | 284  | 305  | 310  | 326  | 290  | 239  | 303  | 303  | 284  | 294  | 0.97     | 0.689481 | 285  | 1.00     | 0.968589 |
| 248802_at | A15g47430 | Expressed protein ; supported by cDNV formyltetrahydrofolate dehydrolyase, puta      | 2980 | 467  | 422  | 418  | 523  | 340  | 395  | 427  | 0.92     | 0.684887 | 387  | 446  | 415  | 582  | 436  | 461  | 423  | 416  | 417  | 0.88 | 0.221552 | 403      | 0.84 | 0.184177 |          |
| 248803_at | A15g47460 | selenium-binding protein-like pentatricopeptide (PPR) repeat-containi                | 47   | 64   | 77   | 89   | 86   | 75   | 63   | 83   | 0.75     | 0.103271 | 44   | 41   | 50   | 47   | 40   | 56   | 52   | 45   | 48   | 0.93 | 0.421738 | 45       | 1.01 | 0.925227 |          |
| 248804_at | A15g47470 | nuclein-like protein                                                                 | 40   | 30   | 46   | 37   | 44   | 42   | 39   | 41   | 0.95     | 0.707197 | 30   | 29   | 32   | 31   | 25   | 27   | 29   | 28   | 30   | 28   | 1.08     | 0.163911 | 28   | 1.09     | 0.270270 |
| 248805_at | A15g47480 | outative protein similar to unknown ord expressed protein                            | 391  | 344  | 306  | 264  | 385  | 305  | 314  | 339  | 0.99     | 0.814771 | 284  | 305  | 310  | 326  | 290  | 239  | 303  | 303  | 284  | 294  | 0.97     | 0.689481 | 285  | 1.00     | 0.968589 |
| 248806_at | A15g47490 | outative protein contains similarity to ur expressed protein                         | 82   | 98   | 103  | 112  | 118  | 93   | 94   | 108  | 0.88     | 0.247027 | 80   | 68   | 92   | 99   | 91   | 78   | 88   | 81   | 80   | 88   | 0.91     | 0.305078 | 89   | 0.89     | 0.344545 |
| 248807_at | A15g47500 | pectin methyltransferase-like pectinesterase family protein                          | 1564 | 2060 | 1704 | 2579 | 2922 | 2320 | 1776 | 2607 | 0.68     | 0.022100 | 1469 | 1409 | 1471 | 2536 | 1985 | 1814 | 2064 | 2012 | 1450 | 2082 | 0.70     | 0.079322 | 2112 | 0.69     | 0.038892 |
| 248808_at | A15g47510 | putative protein contains similarity to pr SEC14 cytosolic factor family protein / p | 33   | 33   | 40   | 42   | 49   | 46   | 35   | 46   | 0.77     | 0.026120 | 27   | 30   | 35   | 40   | 32   | 26   | 34   | 29   | 31   | 33   | 0.95     | 0.657628 | 33   | 0.93     | 0.668264 |
| 248809_at | A15g47520 | GTP-binding protein-like : supported b Ras-related GTP-binding protein, putative     | 4620 | 5121 | 5205 | 565  | 505  | 444  | 550  | 481  | 0.82     | 0.120378 | 444  | 438  | 465  | 655  | 521  | 458  | 463  | 464  | 455  | 512  | 0.86     | 0.304017 | 545  | 0.82     | 0.269966 |
| 248810_at | A15g47530 | putative protein similar to unknown proL asin-responsive protein, putative           | 42   | 44   | 81   | 54   | 64   | 55   | 56   | 58   | 0.96     | 0.871960 | 61   | 64   | 68   | 53   | 42   | 41   | 49   | 47   | 64   | 47   | 1.38     | 0.001862 | 46   | 1.41     | 0.012686 |
| 248751_at | A15g47540 | outative protein similar to unknown ord asin-responsive protein, outative // Mo      | 146  | 172  | 154  | 192  | 171  | 186  | 138  | 170  | 1.65     | 0.031207 | 113  | 114  | 134  | 171  | 147  | 151  | 116  | 120  | 121  | 141  | 0.86     | 0.212360 | 157  | 0.77     | 0.023530 |
| 248752_at | A15g47600 | unknown protein                                                                      | 368  | 537  | 508  | 736  | 808  | 728  | 471  | 757  | 0.62     | 0.007843 | 243  | 232  | 273  | 565  | 481  | 375  | 257  | 242  | 249  | 384  | 0.65     | 0.160143 | 474  | 0.53     | 0.016532 |
| 248753_at | A15g47630 | acyl carrier protein-like : supported b acyl carrier family protein / ACP family o   | 145  | 153  | 143  | 167  | 169  | 130  | 133  | 156  | 0.85     | 0.057446 | 148  | 144  | 150  | 245  | 167  | 180  | 194  | 168  | 147  | 191  | 0.77     | 0.072499 | 198  | 0.74     | 0.115608 |
| 248754_at | A15g47670 | putative protein contains similarity to C1 CCAT-box binding transcription factor 1   | 30   | 39   | 51   | 53   | 59   | 40   | 53   | 63   | 0.95     | 0.558920 | 40   | 31   | 32   | 35   | 32   | 33   | 36   | 33   | 32   | 34   | 0.96     | 0.559525 | 34   | 0.94     | 0.494469 |
| 248755_at | A15g47690 | putative protein strons similarity to unk expressed protein                          | 326  | 459  | 454  | 431  | 450  | 370  | 413  | 417  | 0.99     | 0.942572 | 274  | 222  | 276  | 299  | 269  | 214  | 313  | 303  | 258  | 280  | 0.92     | 0.445697 | 291  | 0.90     | 0.926073 |
| 248756_at | A15g47560 | sodium-dicarboxylate cotransporter-like sodium/dicarboxylate cotransporter, puti     | 76   | 109  | 207  | 159  | 173  | 115  | 131  | 149  | 0.88     | 0.690117 | 90   | 100  | 77   | 188  | 149  | 142  | 192  | 178  | 89   | 170  | 0.52     | 0.001497 | 159  | 0.56     | 0.011450 |
| 248757_at | A15g47680 | putative protein contains similarity to ur expressed protein                         | 500  | 644  | 702  | 666  | 705  | 586  | 616  | 652  | 0.94     | 0.625222 | 571  | 617  | 657  | 872  | 649  | 643  | 685  | 665  | 615  | 703  | 0.87     | 0.193449 | 722  | 0.85     | 0.251963 |
| 248758_at | A15g47620 | RNA-binding protein-like : supported b heteronuclear nuclear ribonucleoteinte        | 210  | 274  | 268  | 260  | 274  | 269  | 210  | 274  | 0.82     | 0.869017 | 244  | 269  | 251  | 359  | 306  | 344  | 409  | 365  | 385  | 426  | 0.91     | 0.341273 | 434  | 0.87     | 0.327798 |
| 248759_at | A15g47610 | outative protein similar to unknown ord zinc finger (C3HC4-type RING finger) fa      | 18   | 42   | 62   | 25   | 24   | 24   | 41   | 24   | 1.67     | 0.265952 | 15   | 18   | 23   | 21   | 18   | 15   | 18   | 17   | 19   | 18   | 1.06     | 0.613747 | 18   | 1.05     | 0.763605 |
| 248760_at | A15g47570 | unknown protein : supported by full-len expressed protein                            | 1510 | 2002 | 1969 | 2054 | 2347 | 1891 | 1827 | 2097 | 0.87     | 0.261842 | 2068 | 2037 | 2043 | 2    |      |      |      |      |      |      |          |          |      |          |          |

|           |           |                                                                                    |                                                                |      |      |      |      |      |      |      |      |          |          |          |      |      |      |      |      |      |      |      |      |          |          |      |          |          |
|-----------|-----------|------------------------------------------------------------------------------------|----------------------------------------------------------------|------|------|------|------|------|------|------|------|----------|----------|----------|------|------|------|------|------|------|------|------|------|----------|----------|------|----------|----------|
| 248742_42 | A15g48200 | unknown protein                                                                    | hypothetical protein                                           | 41   | 39   | 55   | 47   | 49   | 45   | 45   | 47   | 0.97     | 0.785897 | 36       | 38   | 51   | 39   | 37   | 35   | 41   | 41   | 42   | 39   | 1.08     | 0.473202 | 37   | 1.12     | 0.414504 |
| 248743_41 | A15g48240 | unknown protein                                                                    | hypothetical protein                                           | 246  | 283  | 303  | 307  | 341  | 244  | 277  | 297  | 0.93     | 0.581525 | 234      | 217  | 248  | 343  | 259  | 259  | 306  | 291  | 233  | 292  | 0.80     | 0.378681 | 287  | 0.81     | 0.140717 |
| 248744_40 | A15g48250 | outative protein contains similarity to Cr zinc finger (B-box type) family protein |                                                                | 75   | 100  | 122  | 88   | 143  | 111  | 99   | 114  | 0.87     | 0.501808 | 111      | 125  | 112  | 117  | 114  | 116  | 144  | 125  | 116  | 123  | 0.94     | 0.414423 | 116  | 1.00     | 0.937779 |
| 248745_39 | A15g48260 | outative protein contains similarity to Cr zinc finger (B-box type) family protein |                                                                | 47   | 78   | 78   | 78   | 74   | 78   | 78   | 77   | 0.86     | 0.232622 | 47       | 56   | 69   | 56   | 56   | 56   | 56   | 56   | 56   | 56   | 1.05     | 0.641799 | 55   | 1.05     | 0.963366 |
| 248771_1  | A15g48270 | outative protein similar to unknown pro                                            | hypothetical protein                                           | 14   | 15   | 23   | 18   | 19   | 19   | 18   | 19   | 0.94     | 0.703603 | 11       | 15   | 14   | 12   | 9    | 11   | 15   | 13   | 12   | 108  | 0.582727 | 11       | 1.26 | 0.145952 |          |
| 248712_42 | A15g48280 | unknown protein                                                                    | hypothetical protein                                           | 14   | 15   | 18   | 17   | 14   | 14   | 16   | 15   | 1.04     | 0.701620 | 9        | 15   | 13   | 8    | 10   | 17   | 15   | 14   | 12   | 11   | 1.07     | 0.730406 | 9    | 1.30     | 0.204006 |
| 248713_41 | A15g48180 | putative protein contains similarity to ia                                         | keith repeat-containing protein                                | 344  | 341  | 311  | 481  | 213  | 345  | 332  | 347  | 0.96     | 0.859296 | 315      | 360  | 415  | 304  | 353  | 210  | 376  | 340  | 363  | 318  | 1.14     | 0.328751 | 291  | 1.25     | 0.216813 |
| 248714_40 | A15g48190 | putative protein contains similarity to                                            | polyketide synthase, putative / pectinase,                     | 35   | 35   | 18   | 27   | 15   | 29   | 20   | 145  | 0.154118 | 17       | 14       | 15   | 10   | 13   | 12   | 13   | 12   | 13   | 12   | 13   | 1.32     | 0.161418 | 12   | 1.35     | 0.043366 |
| 248715_39 | A15g48290 | ATTP4, putative                                                                    | heavy-metal-associated domain-contain                          | 35   | 43   | 51   | 40   | 33   | 36   | 45   | 36   | 1.25     | 0.048310 | 48       | 52   | 58   | 44   | 36   | 36   | 46   | 48   | 45   | 42   | 1.25     | 0.038281 | 39   | 1.36     | 0.024144 |
| 248716_38 | A15g48210 | unknown protein .supported by full-len                                             | expressed protein                                              | 24   | 35   | 32   | 35   | 39   | 31   | 30   | 35   | 0.87     | 0.314379 | 22       | 26   | 26   | 25   | 21   | 24   | 23   | 26   | 25   | 24   | 1.03     | 0.672464 | 23   | 1.05     | 0.574890 |
| 248717_37 | A15g48175 | Expressed protein .supported by full-len                                           | expressed protein                                              | 54   | 60   | 62   | 63   | 55   | 53   | 60   | 0.88 | 0.220305 | 51       | 46       | 52   | 47   | 45   | 50   | 55   | 54   | 50   | 60   | 0.99 | 0.852359 | 48       | 1.05 | 0.372249 |          |
| 248687_36 | A15g48300 | ADPG vrvchosohvase small subuni                                                    | adipic-1-phosphate adenylyltransferase                         | 459  | 480  | 496  | 747  | 643  | 639  | 478  | 676  | 0.71     | 0.055768 | 516      | 536  | 635  | 644  | 595  | 537  | 662  | 636  | 662  | 0.88 | 0.533343 | 682      | 0.82 | 0.446709 |          |
| 248688_35 | A15g48220 | indole-3-ylcaral phosphate synthase                                                | indole-3-ylcaral phosphate synthase p                          | 116  | 169  | 181  | 168  | 180  | 155  | 169  | 0.92 | 0.533227 | 120      | 122      | 127  | 174  | 131  | 131  | 142  | 139  | 123  | 143  | 0.86 | 0.105911 | 145      | 0.85 | 0.198022 |          |
| 248689_34 | A15g48150 | SCARECROW gene regulator-like ;                                                    | su phytochrome A signal transduction 1 (P                      | 268  | 334  | 369  | 511  | 535  | 400  | 324  | 492  | 0.66     | 0.018140 | 332      | 339  | 377  | 590  | 466  | 424  | 548  | 530  | 349  | 512  | 0.88     | 0.007295 | 493  | 0.71     | 0.049587 |
| 248690_33 | A15g48230 | acetyl-CoA C-acetyltransferase ;                                                   | suapi acetyl-CoA C-acyltransferase, putative /                 | 554  | 742  | 737  | 933  | 1002 | 838  | 678  | 924  | 0.73     | 0.034243 | 740      | 764  | 838  | 1234 | 958  | 854  | 898  | 877  | 781  | 964  | 0.81     | 0.102344 | 1015 | 0.77     | 0.115467 |
| 248691_32 | A15g48310 | outative protein stons similarity to unk                                           | expressed protein                                              | 269  | 323  | 277  | 332  | 363  | 296  | 290  | 330  | 0.88     | 0.150241 | 220      | 181  | 269  | 287  | 261  | 208  | 239  | 229  | 223  | 245  | 0.91     | 0.438420 | 252  | 0.89     | 0.454294 |
| 248692_31 | A15g48300 | hypothetical protein                                                               | DC1 domain-containing protein // DC1 c                         | 8    | 13   | 10   | 13   | 14   | 12   | 10   | 13   | 0.109734 | 11       | 10       | 6    | 10   | 6    | 11   | 15   | 12   | 9    | 11   | 0.82 | 0.389333 | 9        | 0.99 | 0.990546 |          |
| 248693_30 | A15g48330 | regulator of chromosome condensation                                               | regulator of chromosome condensation                           | 115  | 127  | 110  | 179  | 191  | 138  | 117  | 169  | 0.69     | 0.035667 | 161      | 144  | 161  | 251  | 194  | 193  | 207  | 206  | 155  | 210  | 0.74     | 0.010164 | 213  | 0.73     | 0.046717 |
| 248694_29 | A15g48340 | unknown protein                                                                    | expressed protein                                              | 98   | 121  | 135  | 153  | 153  | 142  | 118  | 149  | 0.97     | 0.048198 | 106      | 99   | 112  | 136  | 115  | 102  | 145  | 139  | 106  | 127  | 0.83     | 0.106369 | 117  | 0.90     | 0.339736 |
| 248695_28 | A15g48350 | putative protein similar to unknown pro                                            | hypothetical protein                                           | 78   | 97   | 109  | 91   | 109  | 92   | 94   | 97   | 0.97     | 0.803293 | 91       | 86   | 96   | 99   | 87   | 69   | 96   | 93   | 91   | 89   | 1.03     | 0.758271 | 85   | 1.07     | 0.525739 |
| 248696_27 | A15g48360 | putative protein similar to unknown pro                                            | formin homology 2 domain-containing pr                         | 552  | 688  | 598  | 933  | 1136 | 786  | 613  | 951  | 0.64     | 0.036241 | 379      | 302  | 423  | 697  | 577  | 488  | 521  | 517  | 368  | 560  | 0.66     | 0.013874 | 567  | 0.63     | 0.035561 |
| 248697_26 | A15g48370 | outative protein contains similarity to                                            | ac thioesterase family protein                                 | 110  | 125  | 141  | 159  | 161  | 135  | 126  | 152  | 0.83     | 0.099792 | 152      | 137  | 158  | 229  | 176  | 170  | 177  | 170  | 149  | 185  | 0.81     | 0.065319 | 192  | 0.78     | 0.096131 |
| 248698_25 | A15g48380 | receptor-like protein kinase ;                                                     | suported leucine-rich reoeat famiv protein / rotei             | 177  | 196  | 233  | 286  | 354  | 247  | 202  | 296  | 0.68     | 0.057082 | 150      | 147  | 152  | 211  | 184  | 169  | 259  | 211  | 150  | 207  | 0.72     | 0.031017 | 188  | 0.79     | 0.035421 |
| 248699_24 | A15g48390 | outative protein similar to unknown pro                                            | expressed protein // tetraicoceotide re                        | 23   | 24   | 28   | 29   | 32   | 29   | 25   | 30   | 0.84     | 0.043414 | 21       | 28   | 25   | 22   | 24   | 21   | 23   | 20   | 25   | 22   | 1.13     | 0.172857 | 22   | 1.10     | 0.341968 |
| 248700_23 | A15g48400 | ligand-gated ion channel protein-like ;                                            | glutamate receptor family protein (GLR1                        | 25   | 39   | 34   | 41   | 39   | 30   | 38   | 0.79 | 0.198195 | 24       | 23       | 24   | 23   | 22   | 23   | 28   | 23   | 24   | 24   | 1.01 | 0.615574 | 23       | 1.06 | 0.404755 |          |
| 248701_22 | A15g48410 | ligand-gated ion channel protein-like ;                                            | glutamate receptor family protein (GLR1                        | 32   | 39   | 43   | 44   | 42   | 43   | 38   | 43   | 0.88     | 0.201439 | 38       | 40   | 52   | 42   | 40   | 44   | 47   | 43   | 43   | 43   | 1.01     | 0.937895 | 42   | 1.04     | 0.761371 |
| 248702_21 | A15g48420 | unknown protein                                                                    | hypothetical protein                                           | 35   | 39   | 60   | 49   | 50   | 48   | 44   | 49   | 0.90     | 0.571122 | 32       | 26   | 32   | 36   | 30   | 31   | 40   | 33   | 30   | 34   | 0.89     | 0.226049 | 32   | 0.93     | 0.483431 |
| 248703_20 | A15g48430 | dermal olivocortin precursor, extra                                                | extrae expressed protein                                       | 38   | 41   | 55   | 44   | 49   | 43   | 45   | 46   | 0.99     | 0.912332 | 27       | 26   | 36   | 31   | 29   | 24   | 46   | 34   | 30   | 33   | 0.91     | 0.599469 | 28   | 1.06     | 0.667267 |
| 248704_19 | A15g48450 | outative protein oectinesterase-like ;                                             | als multi-cooxoase type I famiv protein                        | 188  | 217  | 215  | 275  | 290  | 238  | 207  | 268  | 0.77     | 0.027605 | 177      | 166  | 202  | 263  | 241  | 191  | 225  | 188  | 162  | 221  | 0.82     | 0.104627 | 231  | 0.79     | 0.105624 |
| 248705_18 | A15g48470 | outative protein similar to unknown pro                                            | expressed protein                                              | 99   | 131  | 129  | 122  | 119  | 148  | 109  | 122  | 114      | 0.89     | 0.096507 | 97   | 91   | 104  | 97   | 114  | 89   | 124  | 107  | 114  | 0.85     | 0.150513 | 112  | 0.86     | 0.303664 |
| 248706_17 | A15g48530 | unknown protein                                                                    | multi-expressed protein                                        | 38   | 45   | 55   | 50   | 55   | 49   | 46   | 52   | 0.89     | 0.337879 | 42       | 45   | 49   | 45   | 40   | 40   | 47   | 45   | 46   | 43   | 1.05     | 0.377145 | 42   | 1.10     | 0.25274  |
| 248707_16 | A15g48550 | putative protein similar to unknown pro                                            | F-box family protein-related                                   | 37   | 39   | 58   | 49   | 48   | 51   | 45   | 50   | 0.91     | 0.524538 | 33       | 30   | 37   | 32   | 30   | 36   | 44   | 33   | 33   | 35   | 0.95     | 0.642521 | 33   | 1.01     | 0.880615 |
| 248708_15 | A15g48560 | putative protein contains similarity to ur                                         | basic helix-loop-helix (bHLH) family prot                      | 19   | 21   | 27   | 23   | 23   | 24   | 22   | 23   | 0.95     | 0.639444 | 37       | 43   | 42   | 39   | 30   | 32   | 44   | 39   | 40   | 39   | 1.04     | 0.631140 | 37   | 1.09     | 0.349664 |
| 248709_14 | A15g48470 | outative protein contains similarity to                                            | ubiquitin-related                                              | 22   | 23   | 29   | 29   | 29   | 25   | 25   | 27   | 0.91     | 0.425619 | 21       | 25   | 29   | 22   | 21   | 22   | 21   | 21   | 21   | 21   | 1.16     | 0.197033 | 21   | 1.29     | 0.024933 |
| 248710_13 | A15g48480 | unknown protein .supported by full-len                                             | expressed protein                                              | 4205 | 4682 | 5508 | 5250 | 5516 | 5217 | 4798 | 5327 | 0.90     | 0.248365 | 3802     | 4539 | 4605 | 5437 | 4403 | 4009 | 5490 | 5415 | 4315 | 4951 | 0.87     | 0.217671 | 4617 | 0.93     | 0.577636 |
| 248683_12 | A15g48490 | outative protein similar to unknown pro                                            | disease inhibitor/seed storage/lcid tran                       | 405  | 607  | 495  | 603  | 614  | 511  | 503  | 576  | 0.87     | 0.337378 | 399      | 356  | 374  | 572  | 377  | 402  | 478  | 464  | 377  | 459  | 0.82     | 0.127304 | 450  | 0.84     | 0.304130 |
| 248684_11 | A15g48485 | Expressed protein ;                                                                | supported by full-len disease inhibitor/seed storage/lcid tran | 1093 | 1364 | 1421 | 2023 | 1896 | 1714 | 1293 | 1878 | 0.69     | 0.012415 | 1018     | 1221 | 1246 | 2214 | 1577 | 1370 | 1320 | 1297 | 1162 | 1556 | 0.75     | 0.145287 | 1720 | 0.68     | 0.102026 |
| 248685_10 | A15g48500 | outative protein similar to unknown pro                                            | expressed protein                                              | 743  | 873  | 951  | 1047 | 930  | 858  | 1057 | 951  | 0.81     | 0.102811 | 887      | 754  | 838  | 1184 | 867  | 776  | 808  | 766  | 688  | 868  | 0.86     | 0.209996 | 952  | 0.80     | 0.174666 |
| 248686_9  | A15g48540 | 33 kDa secretory protein-like ;                                                    | support 33 kDa secretory protein-related                       | 38   | 40   | 70   | 46   | 44   | 39   | 49   | 43   | 1.15     | 0.588128 | 37       | 48   | 41   | 38   | 34   | 32   | 37   | 36   | 42   | 35   | 1.19     | 0.051025 | 35   | 1.21     | 0.120827 |
| 248686_8  | A15g48460 | fibrin 2 (cblAAB97844.1) ;                                                         | supported fibrin-like protein, putative                        | 115  | 157  | 128  | 161  | 178  | 150  | 133  | 163  | 0.82     | 0.120889 | 114      | 92   | 116  | 145  | 129  | 106  | 133  | 108  | 107  | 124  | 0.87     | 0.196636 | 126  | 0.85     | 0.243724 |
| 248687_7  | A15g48570 | peptidylprolyl isomerase                                                           | peotidyl-rolvi cis-trans isomerase, outal                      | 72   | 153  | 65   | 120  | 455  | 156  | 97   | 244  | 0.40     | 0.251345 | 69       | 53   | 68   | 57   | 42   | 40   | 54   | 51   | 63   | 49   | 1.31     | 0.045119 | 46   | 1.37     | 0.084982 |
| 248688_6  | A15g48600 | chromosome condensation protein                                                    | structural maintenance of chromosomes                          | 191  | 259  | 286  | 274  | 276  | 236  | 229  | 262  | 0.87     | 0.235771 | 140      | 134  | 185  | 146  | 119  | 169  | 163  | 153  | 158  | 144  | 0.87     | 0.791397 | 153  | 1.00     | 0.265137 |
| 248689_5  | A15g48640 | cyclin C-like protein                                                              | cyclin C-like protein                                          | 204  | 172  | 172  | 228  | 174  | 228  | 191  | 212  | 0.74     | 0.049653 | 186      | 211  | 204  | 213  | 203  | 255  | 248  | 219  | 204  | 282  | 0.92     | 0.191663 | 284  | 0.72     | 0.086205 |
| 248690_4  | A15g48650 | RNA-binding protein-like                                                           | nuclear transport factor 2 (NTF2) famiv                        | 382  | 405  | 491  | 520  | 555  | 491  | 426  | 522  | 0.82     | 0.064467 | 402      | 364  | 409  | 555  | 486  | 386  | 462  | 456  | 392  | 469  | 0.84     | 0.086594 | 475  | 0.82     | 0.175790 |
| 248691_3  | A15g48670 | putative protein contains similarity to M                                          | MADS-box family protein                                        | 31   | 135  | 196  | 170  | 157  | 169  | 154  | 165  | 0.93     | 0.630911 | 93       | 101  | 128  | 115  | 94   | 91   | 115  | 103  | 107  | 104  | 1.03     | 0.737690 | 100  | 1.07     | 0.619091 |
| 248692_2  | A15g48690 | unknown protein                                                                    | hypothetical protein                                           | 29   | 34   | 37   | 40   | 42   | 43   | 33   | 42   | 0.80     | 0.025041 | 34       | 34   | 36   | 47   | 35   | 35   | 46   | 42   | 35   | 41   | 0.85     | 0.130125 | 39   | 0.90     | 0.366531 |
| 248693_1  | A15g48590 | outative protein stons similarity to unk                                           | expressed protein                                              | 201  | 231  | 270  | 301  | 230  | 310  | 230  | 319  | 1.14     | 0.536667 | 233      | 341  | 276  | 358  | 387  | 343  | 300  | 383  |      |      |          |          |      |          |          |

|             |           |                                                                                      |      |      |      |      |      |      |      |      |          |          |          |      |      |      |      |      |      |      |      |      |      |          |          |      |          |          |
|-------------|-----------|--------------------------------------------------------------------------------------|------|------|------|------|------|------|------|------|----------|----------|----------|------|------|------|------|------|------|------|------|------|------|----------|----------|------|----------|----------|
| 248620_at   | A15g49320 | putative protein similar to unknown prl expressed protein                            | 66   | 98   | 110  | 151  | 165  | 133  | 92   | 150  | 0.61     | 0.021461 | 92       | 99   | 107  | 221  | 172  | 163  | 147  | 153  | 99   | 171  | 0.58 | 0.006844 | 186      | 0.53 | 0.009644 |          |
| 248621_at   | A15g49350 | putative protein similar to unknown prl pseudogene, glycine-rich protein             | 24   | 27   | 45   | 40   | 45   | 42   | 32   | 42   | 0.76     | 0.188344 | 26       | 25   | 25   | 27   | 24   | 24   | 26   | 31   | 25   | 27   | 0.96 | 0.478869 | 25       | 1.01 | 0.818257 |          |
| 248622_at   | A15g49360 | xylosidase                                                                           | 383  | 541  | 549  | 725  | 813  | 479  | 491  | 672  | 0.73     | 0.185858 | 228      | 314  | 205  | 475  | 513  | 382  | 529  | 511  | 249  | 482  | 0.52 | 0.001627 | 457      | 0.55 | 0.015490 |          |
| 248623_at   | A15g49380 | putative protein similar to unknown crol expressed protein                           | 96   | 117  | 82   | 120  | 127  | 106  | 86   | 117  | 0.77     | 0.000132 | 99       | 96   | 94   | 114  | 102  | 115  | 106  | 105  | 116  | 115  | 0.99 | 0.350923 | 124      | 1.10 | 0.945106 |          |
| 248592_at   | A15g49280 | putative protein - supported by full-length hydroxaline-rich alveolconin family c    | 53   | 53   | 75   | 117  | 111  | 96   | 60   | 108  | 0.56     | 0.008337 | 50       | 52   | 64   | 111  | 96   | 95   | 105  | 92   | 55   | 100  | 0.55 | 0.002007 | 101      | 0.55 | 0.002412 |          |
| 248593_at   | A15g49180 | pectin methyltransferase - supported by fu_pectinesterase family protein             | 3154 | 3748 | 3748 | 3067 | 4069 | 3521 | 3550 | 3852 | 0.92     | 0.308728 | 2603     | 2481 | 2763 | 3593 | 3133 | 2577 | 3134 | 3164 | 2616 | 3120 | 0.84 | 0.064563 | 3101     | 0.84 | 0.186596 |          |
| 248594_at   | A15g49210 | unknown protein - supported by full-ler expressed protein                            | 114  | 164  | 183  | 191  | 199  | 177  | 154  | 189  | 0.81     | 0.175292 | 147      | 178  | 143  | 247  | 169  | 170  | 156  | 146  | 156  | 177  | 0.88 | 0.430617 | 195      | 0.80 | 0.236885 |          |
| 248595_at   | A15g49230 | novel-induced protein D19-like protein through responsive family protein             | 310  | 415  | 429  | 484  | 393  | 477  | 459  | 482  | 0.71     | 0.000132 | 332      | 342  | 368  | 448  | 418  | 367  | 448  | 418  | 367  | 448  | 0.73 | 0.032538 | 531      | 0.73 | 0.052115 |          |
| 248596_at   | A15g49330 | putative protein contains similarity to m myb family transcription factor            | 40   | 67   | 68   | 126  | 128  | 116  | 58   | 123  | 0.47     | 0.002294 | 27       | 27   | 37   | 44   | 40   | 37   | 30   | 33   | 30   | 39   | 0.78 | 0.051529 | 40       | 0.75 | 0.060488 |          |
| 248597_at   | A15g49160 | DNA (cytosine-5-methyltransferase (D) DNA (cytosine-5-methyltransferase (A'          | 420  | 512  | 465  | 544  | 566  | 465  | 466  | 525  | 0.89     | 0.219346 | 302      | 233  | 323  | 384  | 340  | 252  | 311  | 302  | 286  | 312  | 0.92 | 0.485543 | 316      | 0.91 | 0.566780 |          |
| 248598_at   | A15g49370 | putative protein contains similarity to ur hypothetical protein                      | 6    | 9    | 7    | 9    | 11   | 9    | 7    | 10   | 0.74     | 0.103047 | 6        | 11   | 6    | 6    | 6    | 6    | 6    | 6    | 9    | 8    | 1.22 | 0.413852 | 5        | 1.40 | 0.293431 |          |
| 248599_at   | A15g49380 | putative protein contains similarity to ur hypothetical protein                      | 36   | 41   | 46   | 45   | 47   | 50   | 41   | 47   | 0.87     | 0.147154 | 28       | 34   | 37   | 30   | 25   | 29   | 32   | 30   | 33   | 29   | 1.12 | 0.181035 | 28       | 1.17 | 0.182549 |          |
| 248600_at   | A15g49390 | putative protein contains similarity to ur hypothetical protein                      | 68   | 8    | 74   | 92   | 71   | 76   | 81   | 0.84 | 0.633300 | 72       | 55       | 76   | 74   | 71   | 71   | 59   | 80   | 83   | 68   | 73   | 0.93 | 0.495868 | 67       | 1.01 | 0.946709 |          |
| 248601_at   | A15g49400 | putative protein contains similarity to ur zinc knuckle (CCHC-type) family protein   | 162  | 211  | 203  | 191  | 209  | 165  | 192  | 188  | 1.02     | 0.861596 | 187      | 217  | 205  | 279  | 215  | 204  | 221  | 211  | 203  | 226  | 0.90 | 0.276838 | 233      | 0.87 | 0.304688 |          |
| 248602_s_at | A15g49420 | MADS-box protein-like MADS-box protein (AGL84) /// MADS-bc                           | 10   | 6    | 7    | 1    | 5    | 3    | 7    | 3    | 2.63     | 0.052601 | 8        | 5    | 6    | 6    | 5    | 3    | 2    | 3    | 6    | 4    | 1.63 | 0.052020 | 5        | 1.37 | 0.187320 |          |
| 248603_at   | A15g49430 | WD-40 repeat protein-like transducin family protein / WD-40 repeat                   | 80   | 101  | 104  | 106  | 112  | 87   | 95   | 102  | 0.94     | 0.564908 | 77       | 58   | 83   | 68   | 77   | 63   | 73   | 74   | 73   | 71   | 1.03 | 0.753431 | 69       | 1.06 | 0.863710 |          |
| 248604_at   | A15g49470 | putative protein similar to unknown crol expressed protein                           | 37   | 48   | 65   | 62   | 68   | 59   | 50   | 63   | 0.79     | 0.202859 | 53       | 43   | 59   | 63   | 62   | 53   | 57   | 58   | 52   | 59   | 0.88 | 0.162364 | 59       | 0.87 | 0.273449 |          |
| 248606_at   | A15g49450 | putative protein contains similarity to bz bZIP family transcription factor          | 110  | 153  | 215  | 135  | 166  | 148  | 159  | 150  | 1.06     | 0.775238 | 59       | 53   | 83   | 65   | 61   | 64   | 94   | 65   | 76   | 86   | 0.81 | 0.192823 | 63       | 1.03 | 0.861175 |          |
| 248607_at   | A15g49480 | NAC-inducible Ca2+-binding protein-like sodium-inducible calcium-binding protein     | 125  | 108  | 128  | 218  | 191  | 181  | 121  | 197  | 0.61     | 0.004125 | 153      | 146  | 156  | 181  | 146  | 117  | 192  | 163  | 152  | 160  | 0.95 | 0.660145 | 148      | 1.02 | 0.856251 |          |
| 248608_at   | A15g49460 | ATP citrate lyase - supported by cDNA ATP-citrate synthase, putative / ATP-citr      | 471  | 593  | 480  | 746  | 782  | 554  | 515  | 694  | 0.74     | 0.091368 | 437      | 355  | 479  | 629  | 572  | 436  | 509  | 501  | 424  | 534  | 0.79 | 0.075589 | 546      | 0.78 | 0.146206 |          |
| 248609_at   | A15g49440 | unknown protein - supported by cDNA - expressed protein                              | 26   | 26   | 29   | 28   | 28   | 20   | 27   | 29   | 0.94     | 0.210372 | 24       | 22   | 33   | 25   | 30   | 21   | 21   | 23   | 26   | 24   | 1.09 | 0.575560 | 26       | 1.03 | 0.890028 |          |
| 248610_at   | A15g49500 | SRP54 (signal recognition particle 54 KDa signal recognition particle 54 KDa protein | 178  | 180  | 213  | 225  | 241  | 170  | 190  | 212  | 0.90     | 0.419292 | 224      | 159  | 205  | 243  | 217  | 206  | 255  | 249  | 196  | 234  | 0.84 | 0.092060 | 222      | 0.88 | 0.305842 |          |
| 248611_at   | A15g49520 | putative protein contains similarity to W WRKY family transcription factor           | 38   | 53   | 44   | 60   | 56   | 48   | 45   | 55   | 0.82     | 0.143110 | 39       | 45   | 41   | 38   | 33   | 36   | 40   | 38   | 42   | 37   | 1.13 | 0.095258 | 35       | 1.18 | 0.051516 |          |
| 248612_at   | A15g49530 | putative protein contains similarity to ur SIN-like family protein                   | 278  | 349  | 393  | 377  | 469  | 327  | 340  | 391  | 0.87     | 0.336475 | 291      | 253  | 297  | 389  | 367  | 286  | 356  | 328  | 280  | 345  | 0.81 | 0.044606 | 348      | 0.81 | 0.120436 |          |
| 248613_at   | A15g49555 | phytylene dehydrogenase-like                                                         | 368  | 490  | 476  | 555  | 625  | 505  | 444  | 562  | 0.79     | 0.088067 | 459      | 432  | 493  | 671  | 562  | 475  | 580  | 564  | 461  | 570  | 0.81 | 0.046391 | 569      | 0.81 | 0.043200 |          |
| 248614_at   | A15g49560 | putative protein similar to unknown prl expressed protein                            | 96   | 113  | 114  | 124  | 111  | 114  | 108  | 116  | 0.93     | 0.279608 | 152      | 177  | 181  | 241  | 170  | 171  | 189  | 171  | 170  | 188  | 0.90 | 0.380132 | 194      | 0.88 | 0.383967 |          |
| 248615_at   | A15g49570 | putative protein contains similarity to oe transglutaminase-like family protein      | 133  | 175  | 171  | 195  | 225  | 156  | 160  | 192  | 0.83     | 0.251903 | 131      | 119  | 126  | 185  | 143  | 122  | 170  | 155  | 125  | 155  | 0.81 | 0.087995 | 150      | 0.83 | 0.256769 |          |
| 248616_at   | A15g49580 | putative protein contains similarity to ur DNA heat shock N-terminal domain-co       | 204  | 265  | 267  | 263  | 321  | 249  | 245  | 284  | 0.86     | 0.251048 | 241      | 201  | 248  | 279  | 260  | 215  | 270  | 264  | 230  | 257  | 0.89 | 0.186539 | 251      | 0.92 | 0.431742 |          |
| 248617_at   | A15g49620 | putative protein similar to unknown prl non-LTR retrotransposon family (LINE)        | 3    | 2    | 0    | 1    | 1    | 1    | 1    | 1    | 0.558433 | 0        | 0        | 0    | 0    | 0    | 0    | 0    | 0    | 0    | 0    | 0    | 1.2  | 0.851948 | 0        | 1.31 | 0.946709 |          |
| 248618_at   | A15g49620 | myb-related transcription factor myb family transcription factor (MYB78)             | 16   | 19   | 21   | 21   | 20   | 17   | 18   | 20   | 0.94     | 0.576227 | 18       | 16   | 20   | 18   | 20   | 21   | 23   | 21   | 18   | 21   | 0.86 | 0.073083 | 20       | 0.90 | 0.231222 |          |
| 248619_at   | A15g49630 | amino acid permease 6 (emb CAAG605t amino acid permease 6 (AAP6)                     | 220  | 239  | 284  | 389  | 505  | 382  | 248  | 425  | 0.58     | 0.015792 | 320      | 280  | 335  | 361  | 343  | 298  | 389  | 383  | 311  | 355  | 0.88 | 0.132413 | 334      | 0.93 | 0.416013 |          |
| 248585_at   | A15g49640 | unknown protein - expressed protein                                                  | 43   | 68   | 46   | 44   | 41   | 44   | 42   | 52   | 43       | 1.20     | 0.327934 | 36   | 42   | 34   | 40   | 31   | 29   | 39   | 41   | 38   | 36   | 1.04     | 0.087887 | 33   | 1.13     | 0.365889 |
| 248586_at   | A15g49610 | putative protein similar to unknown crol T-box family protein                        | 100  | 136  | 145  | 166  | 168  | 140  | 127  | 158  | 0.80     | 0.127683 | 98       | 109  | 121  | 168  | 110  | 121  | 132  | 131  | 110  | 132  | 0.83 | 0.155077 | 133      | 0.82 | 0.285743 |          |
| 248587_at   | A15g49550 | Expressed protein - supported by cDNA - expressed protein                            | 424  | 560  | 531  | 571  | 646  | 518  | 505  | 578  | 0.87     | 0.257902 | 506      | 554  | 553  | 661  | 686  | 607  | 714  | 641  | 538  | 702  | 0.77 | 0.033439 | 718      | 0.75 | 0.078654 |          |
| 248588_at   | A15g49540 | unknown protein - supported by cDNA - expressed protein                              | 860  | 905  | 885  | 1280 | 1436 | 1126 | 917  | 1280 | 0.72     | 0.19837  | 1079     | 935  | 1106 | 1518 | 1364 | 1156 | 1140 | 1094 | 1040 | 1254 | 0.83 | 0.109668 | 1346     | 0.77 | 0.059757 |          |
| 248589_at   | A15g49510 | von Hippel-Lindau binding protein (VHL VHL binding protein) / prefolin,              | 358  | 505  | 871  | 1046 | 1120 | 873  | 838  | 1013 | 0.83     | 0.122011 | 893      | 888  | 946  | 1308 | 1096 | 1021 | 938  | 940  | 1061 | 1061 | 0.88 | 0.151336 | 1142     | 0.80 | 0.057404 |          |
| 248590_at   | A15g49680 | receptor protein kinase - supported by cDNA - expressed protein                      | 41   | 41   | 52   | 151  | 134  | 154  | 151  | 140  | 0.37     | 0.000417 | 137      | 122  | 135  | 135  | 135  | 135  | 272  | 135  | 272  | 211  | 0.93 | 0.000931 | 261      | 0.93 | 0.009166 |          |
| 248591_at   | A15g49650 | xylosylase kinase - supported by cDNA: xylosylase kinase, putative                   | 357  | 485  | 481  | 519  | 619  | 460  | 441  | 532  | 0.83     | 0.216501 | 391      | 361  | 339  | 485  | 443  | 384  | 462  | 428  | 363  | 441  | 0.83 | 0.022161 | 438      | 0.83 | 0.086733 |          |
| 248561_at   | A15g49670 | unknown protein hypothetical protein                                                 | 38   | 44   | 51   | 54   | 61   | 51   | 44   | 55   | 0.80     | 0.069931 | 29       | 35   | 43   | 41   | 35   | 35   | 40   | 35   | 36   | 37   | 0.95 | 0.643562 | 37       | 0.96 | 0.739981 |          |
| 248562_at   | A15g49680 | putative protein strom similarity to unkrl cell expansion protein, putative          | 55   | 63   | 59   | 58   | 62   | 53   | 59   | 58   | 1.01     | 0.838929 | 60       | 66   | 68   | 60   | 55   | 68   | 62   | 59   | 65   | 59   | 1.10 | 0.049326 | 58       | 1.12 | 0.064975 |          |
| 248563_at   | A15g49690 | anthocyanidin-3-glucoside hamnosyl-UDP-glucuronosyl-UDP-glucose transfe              | 59   | 65   | 69   | 67   | 69   | 64   | 68   | 64   | 0.98     | 0.394    | 29       | 34   | 36   | 50   | 37   | 32   | 39   | 41   | 38   | 66   | 1.12 | 0.396282 | 33       | 1.21 | 0.276404 |          |
| 248564_at   | A15g49700 | putative protein contains similarity to A' DNA-binding protein-related               | 64   | 91   | 87   | 95   | 83   | 74   | 92   | 81   | 0.97     | 0.144449 | 50       | 55   | 73   | 59   | 71   | 67   | 62   | 60   | 71   | 67   | 0.88 | 0.238412 | 64       | 0.92 | 0.528828 |          |
| 248565_at   | A15g49710 | putative protein similar to unknown prl expressed protein                            | 297  | 455  | 405  | 425  | 495  | 392  | 386  | 437  | 0.88     | 0.408418 | 501      | 525  | 508  | 700  | 575  | 545  | 596  | 565  | 512  | 596  | 0.86 | 0.060697 | 607      | 0.84 | 0.118330 |          |
| 248566_s_at | A15g49730 | FRQ2-like protein: NADPH oxidase-like ferric reductase-like transmembrane co         | 152  | 219  | 283  | 160  | 184  | 132  | 218  | 159  | 1.37     | 0.220386 | 204      | 198  | 166  | 215  | 189  | 160  | 201  | 192  | 190  | 192  | 0.99 | 0.898090 | 188      | 1.01 | 0.946033 |          |
| 248567_at   | A15g49750 | putative protein contains similarity to alk leucine-rich repeat family protein       | 28   | 20   | 32   | 29   | 24   | 35   | 27   | 29   | 0.91     | 0.604946 | 16       | 24   | 31   | 26   | 19   | 22   | 24   | 24   | 24   | 24   | 0.99 | 0.075605 | 23       | 1.05 | 0.822394 |          |
| 248568_at   | A15g49760 | receptor protein kinase-like leucine-rich repeat family protein / protei             | 132  | 156  | 161  | 132  | 117  | 147  | 117  | 147  | 0.86     | 0.112236 | 45       | 41   | 49   | 45   | 100  | 67   | 64   | 67   | 64   | 67   | 0.54 | 0.005793 | 81       | 0.56 | 0.042478 |          |
| 248569_at   | A15g49770 | receptor protein kinase-like leucine-rich repeat transmembrane protei                | 23   | 27   | 30   | 30   | 36   | 32   | 27   | 33   | 0.82     | 0.097627 | 23       | 22   | 20   | 24   | 25   | 23   | 19   | 20   | 22   | 22   | 0.97 | 0.683135 | 24       | 0.89 | 0.080231 |          |
| 248570_at   | A15g49780 | receptor protein kinase-like leucine-rich repeat transmembrane protei                | 23   | 22   | 35   | 39   | 32   | 39   | 27   | 37   | 0.73     | 0.108177 | 20       | 24   | 26   | 24   | 23   | 24   |      |      |      |      |      |          |          |      |          |          |

|              |            |                                            |                                                               |                           |      |      |      |      |      |      |      |          |          |          |      |      |      |      |      |      |      |      |      |          |          |      |          |          |
|--------------|------------|--------------------------------------------|---------------------------------------------------------------|---------------------------|------|------|------|------|------|------|------|----------|----------|----------|------|------|------|------|------|------|------|------|------|----------|----------|------|----------|----------|
| 2485001_at   | A15f504410 | unknown protein                            | expressed protein                                             | 123                       | 182  | 206  | 216  | 194  | 155  | 204  | 0.76 | 0.056176 | 174      | 227      | 231  | 317  | 233  | 221  | 204  | 198  | 211  | 235  | 0.90 | 0.480073 | 257      | 0.82 | 0.261187 |          |
| 2485014_s_at | A15f50440  | golgi SNARE protein                        | Golgi SNARE protein membrin 12 (MEM                           | 95                        | 122  | 127  | 140  | 170  | 123  | 115  | 144  | 0.80     | 0.153577 | 122      | 124  | 115  | 172  | 131  | 132  | 128  | 120  | 139  | 0.86 | 0.146773 | 145      | 0.83 | 0.145276 |          |
| 2485020_at   | A15f50450  | outative protein strom similarity to unk   | zinc finger (MYND type) family protein                        | 202                       | 281  | 284  | 235  | 302  | 218  | 256  | 252  | 1.02     | 0.922717 | 193      | 185  | 180  | 257  | 205  | 227  | 243  | 229  | 186  | 232  | 0.80     | 0.008215 | 230  | 0.81     | 0.048745 |
| 2485031_at   | A15f50460  | transcription factor similar to t          | transcription factor CCAT- box binding transcription factor 1 | 14                        | 20   | 21   | 24   | 30   | 10   | 10   | 21   | 0.87     | 0.380455 | 16       | 16   | 17   | 19   | 20   | 14   | 17   | 17   | 19   | 1.01 | 0.931457 | 17       | 1.01 | 0.245875 |          |
| 248504_at    | A15f50480  | transcription factor Hap5a-like            | CCAAT-box binding transcription factor 1                      | 37                        | 43   | 51   | 37   | 41   | 41   | 44   | 39   | 1.11     | 0.364603 | 29       | 29   | 39   | 31   | 29   | 25   | 29   | 32   | 32   | 29   | 1.11     | 0.310475 | 28   | 1.14     | 0.326211 |
| 2485050_at   | A15f50360  | putative protein similar to unknown        | prol expressed protein                                        | 44                        | 57   | 297  | 88   | 75   | 68   | 133  | 77   | 1.73     | 0.535704 | 60       | 52   | 62   | 68   | 72   | 67   | 100  | 86   | 58   | 79   | 0.74     | 0.051471 | 69   | 0.84     | 0.028892 |
| 2485050_at   | A15f50370  | adenylate kinase                           | adenylate kinase - supported by full-len                      | adrenate kinase, putative | 279  | 349  | 340  | 398  | 462  | 360  | 323  | 406      | 0.79     | 0.087255 | 329  | 353  | 361  | 527  | 414  | 397  | 388  | 352  | 417  | 0.84     | 0.138621 | 446  | 0.78     | 0.077870 |
| 2485057_at   | A15f50380  | putative protein strom similarity to unk   | expressed protein                                             | 123                       | 182  | 206  | 216  | 194  | 155  | 204  | 0.76 | 0.056176 | 174      | 227      | 231  | 317  | 233  | 221  | 204  | 198  | 211  | 235  | 0.90 | 0.480073 | 257      | 0.82 | 0.261187 |          |
| 2485050_at   | A15f50320  | histone acetyltransferase                  | supported by radical SAM domain-containing protein            | 413                       | 543  | 615  | 577  | 644  | 492  | 524  | 571  | 0.92     | 0.553045 | 380      | 412  | 454  | 584  | 475  | 456  | 474  | 468  | 415  | 491  | 0.85     | 0.077110 | 505  | 0.82     | 0.117521 |
| 2485050_at   | A15f50335  | Expressed protein                          | : supported by full-len expressed protein                     | 39                        | 50   | 52   | 60   | 76   | 63   | 47   | 66   | 0.71     | 0.042008 | 53       | 59   | 59   | 54   | 59   | 38   | 65   | 62   | 57   | 56   | 1.03     | 0.814600 | 50   | 1.13     | 0.358744 |
| 2485104_s_at | A15f50315  | Expressed protein                          | : supported by full-len Mutator-like transposase family       | 137                       | 166  | 187  | 204  | 197  | 169  | 163  | 190  | 0.86     | 0.209004 | 138      | 145  | 147  | 211  | 153  | 156  | 160  | 157  | 143  | 167  | 0.86     | 0.157444 | 173  | 0.83     | 0.190609 |
| 248511_s_at  | A15f50375  | Expressed protein                          | : supported by cDNA cytoporphyl isomerase (CPT1)              | 523                       | 537  | 521  | 605  | 1018 | 753  | 590  | 892  | 0.86     | 0.040222 | 590      | 618  | 681  | 1088 | 873  | 861  | 733  | 663  | 880  | 0.75 | 0.033347 | 941      | 0.70 | 0.022854 |          |
| 248512_at    | A15f50400  | protein translocation complex SecE1        | or protein transport protein SEC61 gamma                      | 1090                      | 1389 | 1241 | 1571 | 1686 | 1453 | 1276 | 1570 | 0.81     | 0.058900 | 1344     | 1406 | 1446 | 1955 | 1456 | 1382 | 1797 | 1633 | 1999 | 0.85 | 0.150793 | 1594     | 0.88 | 0.360630 |          |
| 248513_at    | A15f50500  | unknown protein                            | hypothetical protein                                          | 9                         | 8    | 6    | 11   | 10   | 8    | 9    | 0.91 | 0.611380 | 6        | 9        | 7    | 7    | 9    | 11   | 8    | 8    | 7    | 9    | 0.86 | 0.365200 | 9        | 0.81 | 0.356300 |          |
| 248514_s_at  | A15f50510  | unknown protein                            | hypothetical protein                                          | 23                        | 32   | 37   | 44   | 40   | 41   | 31   | 42   | 0.74     | 0.057005 | 23       | 21   | 31   | 31   | 27   | 26   | 29   | 28   | 25   | 28   | 0.88     | 0.237552 | 28   | 0.88     | 0.405771 |
| 248515_s_at  | A15f50530  | outative protein strom similarity to unk   | CBS domain-containing protein / octicos                       | 66                        | 71   | 95   | 84   | 87   | 93   | 78   | 88   | 0.88     | 0.331896 | 71       | 63   | 78   | 73   | 62   | 58   | 75   | 84   | 71   | 70   | 1.01     | 0.910407 | 64   | 1.10     | 0.338467 |
| 248517_at    | A15f50550  | Sl12p protein                              | WD-40 repeat family protein / Sl12p prot                      | 89                        | 129  | 136  | 141  | 152  | 118  | 118  | 137  | 0.86     | 0.331763 | 95       | 75   | 96   | 108  | 91   | 90   | 110  | 93   | 89   | 99   | 0.90     | 0.242442 | 97   | 0.92     | 0.422800 |
| 248518_at    | A15f50560  | putative protein similar to unknown        | prol expressed protein                                        | 172                       | 255  | 258  | 256  | 341  | 217  | 228  | 271  | 0.84     | 0.402987 | 104      | 101  | 111  | 119  | 109  | 112  | 110  | 113  | 106  | 112  | 0.94     | 0.079045 | 113  | 0.93     | 0.146480 |
| 248519_s_at  | A15f50590  | 11-beta-hydroxysteroid dehydrogenase       | short-chain dehydrogenase/reductase (S                        | 36                        | 47   | 53   | 48   | 50   | 48   | 45   | 49   | 0.93     | 0.498559 | 35       | 35   | 41   | 37   | 30   | 39   | 47   | 37   | 37   | 38   | 0.96     | 0.732294 | 36   | 1.04     | 0.728425 |
| 248520_at    | A15f50600  | 11-beta-hydroxysteroid dehydrogenase       | short-chain dehydrogenase/reductase (S                        | 49                        | 57   | 72   | 94   | 66   | 68   | 60   | 360  | 0.17     | 0.330338 | 46       | 28   | 51   | 35   | 44   | 48   | 39   | 45   | 42   | 42   | 0.99     | 0.942972 | 42   | 0.99     | 0.950958 |
| 248521_s_at  | A15f50630  | nucleolin-like protein                     | : supported by cDN nucleolin family protein                   | 120                       | 146  | 172  | 193  | 179  | 174  | 146  | 182  | 0.80     | 0.085599 | 119      | 125  | 128  | 189  | 140  | 134  | 182  | 166  | 124  | 162  | 0.76     | 0.040026 | 155  | 0.80     | 0.156412 |
| 248522_s_at  | A15f50565  | predicted protein                          | hypothetical protein                                          | 32                        | 37   | 55   | 50   | 51   | 46   | 42   | 49   | 0.84     | 0.338988 | 35       | 24   | 35   | 28   | 31   | 24   | 27   | 31   | 31   | 28   | 1.10     | 0.407132 | 28   | 1.13     | 0.453417 |
| 248523_s_at  | A15f50580  | ubiquitin activating enzyme                | -supported SUMO1 activating enzyme, putative                  | 404                       | 518  | 525  | 610  | 658  | 489  | 482  | 586  | 0.82     | 0.181620 | 555      | 589  | 581  | 794  | 650  | 605  | 630  | 602  | 575  | 656  | 0.88     | 0.140881 | 683  | 0.84     | 0.135314 |
| 248524_s_at  | A15f50570  | putative protein contains similarity to sc | squamosa promoter-binding protein, put                        | 29                        | 38   | 29   | 53   | 50   | 37   | 42   | 47   | 0.91     | 0.774700 | 20       | 25   | 21   | 30   | 26   | 21   | 30   | 27   | 22   | 20   | 0.82     | 0.093182 | 26   | 0.85     | 0.227469 |
| 248525_s_at  | A15f50710  | unknown protein                            | hypothetical protein                                          | 19                        | 21   | 23   | 18   | 19   | 16   | 21   | 18   | 1.19     | 0.058297 | 17       | 13   | 16   | 14   | 15   | 11   | 12   | 15   | 11   | 12   | 1.23     | 0.071615 | 13   | 1.15     | 0.251636 |
| 248526_at    | A15f50730  | putative protein contains similarity to A' | expressed protein                                             | 568                       | 649  | 635  | 655  | 775  | 658  | 617  | 696  | 0.89     | 0.168673 | 508      | 500  | 605  | 834  | 660  | 601  | 523  | 524  | 537  | 628  | 0.85     | 0.299418 | 698  | 0.77     | 0.107248 |
| 248527_at    | A15f50740  | outative protein contains similarity to A' | copper chaperone (CCH)-related                                | 68                        | 74   | 72   | 88   | 111  | 75   | 72   | 91   | 0.79     | 0.142086 | 42       | 56   | 50   | 79   | 69   | 59   | 43   | 46   | 49   | 59   | 0.83     | 0.331742 | 69   | 0.71     | 0.049390 |
| 248528_at    | A15f50760  | outative protein similar to unknown        | crol auxin-responsive family protein                          | 30                        | 29   | 37   | 35   | 36   | 33   | 32   | 35   | 0.92     | 0.404949 | 31       | 30   | 34   | 31   | 31   | 32   | 36   | 32   | 32   | 39   | 0.92     | 0.743834 | 31   | 1.01     | 0.730883 |
| 248494_at    | A15f50720  | outative protein contains similarity to    | or short-chain dehydrogenase/reductase (S                     | 34                        | 44   | 91   | 62   | 51   | 49   | 43   | 59   | 0.87     | 0.345678 | 25       | 24   | 33   | 29   | 32   | 32   | 30   | 41   | 51   | 32   | 0.90     | 0.415511 | 32   | 0.91     | 0.686516 |
| 248495_at    | A15f50780  | putative protein strong similarity to unk  | ATP-binding region, ATPase-like domain                        | 28                        | 38   | 36   | 47   | 54   | 39   | 34   | 47   | 0.73     | 0.075360 | 24       | 24   | 29   | 28   | 31   | 25   | 33   | 31   | 26   | 30   | 0.87     | 0.145331 | 28   | 0.92     | 0.419107 |
| 248496_at    | A15f50790  | MIN3-like protein                          | : supported by full-len nucleolin MIN3 family protein         | 51                        | 191  | 124  | 315  | 242  | 233  | 122  | 263  | 0.46     | 0.042854 | 437      | 554  | 493  | 721  | 662  | 522  | 493  | 483  | 495  | 576  | 0.86     | 0.282138 | 635  | 0.78     | 0.107373 |
| 248496_at    | A15f50720  | putative protein similar to unknown        | prol ABA-responsive protein (HVA22e)                          | 61                        | 71   | 104  | 61   | 73   | 61   | 81   | 65   | 1.24     | 0.276638 | 53       | 53   | 59   | 59   | 45   | 45   | 51   | 50   | 55   | 50   | 1.11     | 0.185749 | 50   | 1.12     | 0.311084 |
| 248497_at    | A15f50840  | MIN3-like protein                          | supported by full-len nucleolin MIN3 family protein           | 15                        | 13   | 20   | 19   | 17   | 16   | 19   | 18   | 0.87     | 0.297816 | 11       | 14   | 13   | 12   | 13   | 16   | 13   | 13   | 13   | 13   | 0.95     | 0.523654 | 14   | 0.92     | 0.019662 |
| 248498_at    | A15f50750  | UDP-glucose-6-phosphate translocase        | : reversibly dicyclocated polypeptide, out                    | 33                        | 39   | 52   | 46   | 45   | 50   | 41   | 47   | 0.88     | 0.374907 | 32       | 37   | 38   | 37   | 34   | 30   | 44   | 36   | 36   | 36   | 0.98     | 0.870149 | 34   | 1.06     | 0.479661 |
| 248499_at    | A15f50820  | putative protein similar to unknown        | prol a small meristem (NAM) family protein                    | 193                       | 290  | 277  | 311  | 448  | 271  | 253  | 344  | 0.74     | 0.217422 | 160      | 154  | 148  | 188  | 189  | 193  | 199  | 186  | 154  | 191  | 0.81     | 0.000097 | 190  | 0.81     | 0.000802 |
| 248470_s_at  | A15f50830  | unknown protein                            | expressed protein                                             | 89                        | 81   | 110  | 89   | 78   | 84   | 93   | 84   | 1.11     | 0.360094 | 83       | 79   | 89   | 73   | 48   | 75   | 86   | 82   | 77   | 73   | 1.06     | 0.702612 | 65   | 1.18     | 0.376936 |
| 248471_at    | A15f50860  | unknown protein                            | expressed protein                                             | 125                       | 248  | 219  | 248  | 290  | 213  | 205  | 250  | 0.82     | 0.130287 | 194      | 154  | 179  | 277  | 214  | 225  | 227  | 175  | 224  | 175  | 0.75     | 0.014660 | 232  | 0.74     | 0.055076 |
| 248472_at    | A15f50860  | cyclin-dependent protein kinase-like       | protein kinase family protein                                 | 125                       | 189  | 200  | 185  | 212  | 159  | 171  | 185  | 0.93     | 0.651347 | 184      | 170  | 164  | 217  | 176  | 169  | 209  | 205  | 173  | 195  | 0.88     | 0.144349 | 188  | 0.92     | 0.412480 |
| 248473_at    | A15f50810  | small zinc finger-like protein             | : supported by full-len nucleolin imort inner membrane tr     | 1067                      | 806  | 818  | 914  | 1016 | 903  | 764  | 944  | 0.81     | 0.039584 | 828      | 853  | 1015 | 1217 | 1054 | 942  | 906  | 879  | 899  | 1000 | 0.90     | 0.319675 | 1071 | 0.84     | 0.156478 |
| 248474_at    | A15f50850  | ornavate dehydrogenase E1 component        | ornavate dehydrogenase E1 component                           | 662                       | 1248 | 1215 | 1326 | 1358 | 1143 | 1175 | 1276 | 0.92     | 0.315446 | 1277     | 1252 | 1330 | 1560 | 1376 | 1242 | 1220 | 1276 | 1286 | 1335 | 0.96     | 0.584810 | 1393 | 0.92     | 0.325069 |
| 248475_at    | A15f50880  | unknown protein                            | hypothetical protein                                          | 7                         | 9    | 14   | 11   | 10   | 13   | 10   | 11   | 0.88     | 0.602064 | 11       | 9    | 10   | 11   | 10   | 9    | 9    | 9    | 9    | 9    | 1.01     | 0.838905 | 10   | 0.99     | 0.944721 |
| 248476_at    | A15f50890  | putative protein similar to unknown        | prol hypothetical protein                                     | 84                        | 95   | 102  | 104  | 112  | 102  | 94   | 106  | 0.88     | 0.171755 | 76       | 115  | 91   | 108  | 100  | 84   | 80   | 89   | 88   | 1.06 | 0.682802 | 97       | 0.87 | 0.217525 |          |
| 248477_at    | A15f50900  | putative protein similar to unknown        | prol armadillo/beta-catenin repeat family prot                | 385                       | 426  | 483  | 483  | 575  | 437  | 431  | 498  | 0.87     | 0.249171 | 353      | 310  | 359  | 448  | 386  | 338  | 434  | 421  | 341  | 405  | 0.84     | 0.065236 | 390  | 0.87     | 0.232766 |
| 248478_at    | A15f50870  | ubiquitin-conjugating enzyme-like          | protein ubiquitin-conjugating enzyme, putative                | 621                       | 746  | 835  | 911  | 954  | 830  | 734  | 898  | 0.82     | 0.084802 | 789      | 867  | 872  | 1260 | 1024 | 920  | 919  | 862  | 843  | 997  | 0.85     | 0.160727 | 1068 | 0.79     | 0.096649 |
| 248479_at    | A15f50910  | unknown protein                            | hypothetical protein                                          | 11                        | 13   | 11   | 12   | 15   | 18   | 12   | 15   | 0.81     | 0.190904 | 10       | 11   | 10   | 10   | 10   | 10   | 10   | 10   | 10   | 10   | 1.01     | 0.859987 | 10   | 1.01     | 0.900853 |
| 248480_at    | A15f50920  | ATP-dependent Clp protease                 | ATP-binding ATP-dependent Clp protease                        | 907                       | 919  | 918  | 967  | 802  | 808  | 873  | 947  | 0.95     | 0.345769 | 805      | 849  | 836  | 956  | 718  | 656  | 875  | 835  | 865  | 947  | 0.76     | 0.052463 | 675  | 0.84     | 0.160472 |
| 248481_at    | A15f50930  | outative protein similar to unknown        | prol hypothetical protein                                     | 106                       | 127  | 140  | 144  | 163  | 135  | 124  | 147  | 0.84     | 0.143925 | 122      | 126  | 141  | 146  | 143  | 139  | 110  | 107  | 129  | 129  | 1.00     | 0.965787 | 143  | 0.91     | 0.099742 |

|           |           |                                             |                                               |      |      |      |      |      |      |      |      |          |          |      |      |      |      |      |      |      |      |      |      |          |          |      |          |          |
|-----------|-----------|---------------------------------------------|-----------------------------------------------|------|------|------|------|------|------|------|------|----------|----------|------|------|------|------|------|------|------|------|------|------|----------|----------|------|----------|----------|
| 248406_at | A15f51490 | pectinesterase                              | pectinesterase family protein                 | 32   | 32   | 40   | 44   | 44   | 44   | 35   | 44   | 0.79     | 0.025270 | 25   | 28   | 30   | 35   | 27   | 29   | 37   | 34   | 28   | 32   | 0.86     | 0.150894 | 30   | 0.91     | 0.432784 |
| 248407_at | A15f51500 | pectinesterase                              | pectinesterase family protein                 | 18   | 21   | 25   | 30   | 26   | 25   | 21   | 27   | 0.79     | 0.082408 | 25   | 27   | 31   | 14   | 17   | 16   | 19   | 13   | 28   | 16   | 1.73     | 0.008011 | 16   | 1.75     | 0.003305 |
| 248408_at | A15f51520 | ripening-related protein-like               | invertase/alpha-galactosidase inhibitor       | 19   | 19   | 28   | 24   | 23   | 23   | 22   | 23   | 0.96     | 0.774501 | 17   | 24   | 24   | 22   | 19   | 18   | 22   | 18   | 21   | 20   | 1.08     | 0.477951 | 20   | 1.10     | 0.517809 |
| 248409_at | A15f51540 | putative protein similar to unknown protein | putative protein similar to unknown protein   | 340  | 341  | 317  | 321  | 305  | 290  | 377  | 329  | 0.19     | 0.510733 | 310  | 369  | 371  | 469  | 389  | 389  | 343  | 344  | 389  | 389  | 0.87     | 0.222292 | 419  | 0.87     | 0.002365 |
| 248410_at | A15f51570 | putative protein similar to unknown protein | putative protein similar to unknown protein   | 350  | 319  | 498  | 465  | 529  | 465  | 389  | 486  | 0.80     | 0.174857 | 283  | 312  | 304  | 402  | 301  | 329  | 329  | 327  | 336  | 330  | 0.88     | 0.140920 | 344  | 0.87     | 0.227841 |
| 248411_at | A15f51580 | unknown protein                             | expressed protein                             | 23   | 27   | 24   | 27   | 39   | 42   | 25   | 36   | 0.68     | 0.079855 | 15   | 15   | 18   | 17   | 19   | 17   | 18   | 18   | 16   | 20   | 0.79     | 0.186746 | 18   | 0.88     | 0.123171 |
| 248412_at | A15f51590 | putative protein contains similarity to     | Di DNA-binding protein-related                | 493  | 569  | 576  | 610  | 722  | 573  | 546  | 635  | 0.86     | 0.183755 | 461  | 454  | 492  | 688  | 587  | 536  | 626  | 573  | 469  | 602  | 0.78     | 0.009436 | 604  | 0.78     | 0.042960 |
| 248413_at | A15f51600 | putative protein strong similarity to       | unknown protein                               | 201  | 232  | 205  | 263  | 205  | 219  | 230  | 0.95 | 0.510733 | 310      | 369  | 371  | 469  | 389  | 389  | 343  | 344  | 389  | 389  | 0.87 | 0.222292 | 419      | 0.87 | 0.002365 |          |
| 248414_at | A15f51610 | 50S ribosomal protein L11-like              | ribosomal protein L11 family protein          | 23   | 23   | 31   | 27   | 35   | 26   | 30   | 0.86 | 0.345452 | 25       | 28   | 25   | 23   | 23   | 21   | 25   | 24   | 25   | 23   | 1.13 | 0.025586 | 22       | 1.16 | 0.029322 |          |
| 248415_at | A15f51620 | unknown protein                             | cre-mRNA processing ribonucleoprotein         | 64   | 86   | 65   | 72   | 98   | 51   | 72   | 74   | 0.97     | 0.899710 | 77   | 67   | 84   | 84   | 73   | 85   | 88   | 85   | 76   | 83   | 0.91     | 0.203787 | 81   | 0.94     | 0.479349 |
| 248416_at | A15f51630 | putative protein contains similarity to     | diacylglycerol kinase                         | 493  | 569  | 576  | 610  | 722  | 573  | 546  | 635  | 0.86     | 0.183755 | 461  | 454  | 492  | 688  | 587  | 536  | 626  | 573  | 469  | 602  | 0.78     | 0.009436 | 604  | 0.78     | 0.042960 |
| 248417_at | A15f51640 | unknown protein                             | hypothetical protein                          | 149  | 156  | 185  | 171  | 190  | 158  | 163  | 173  | 0.94     | 0.540522 | 135  | 108  | 142  | 181  | 171  | 151  | 167  | 170  | 128  | 168  | 0.76     | 0.007301 | 168  | 0.77     | 0.044592 |
| 248418_at | A15f51660 | cleavage and polyadenylation specific       | cleavage and polyadenylation specificity      | 317  | 417  | 381  | 466  | 512  | 381  | 372  | 453  | 0.82     | 0.166655 | 302  | 237  | 333  | 304  | 339  | 276  | 387  | 358  | 291  | 351  | 0.83     | 0.138201 | 336  | 0.86     | 0.363494 |
| 248419_at | A15f51550 | putative protein similar to unknown         | putative protein similar to unknown           | 1647 | 1699 | 1912 | 1341 | 1476 | 1317 | 1719 | 1378 | 1.25     | 0.043224 | 1174 | 1532 | 1194 | 1554 | 1223 | 1122 | 1619 | 1597 | 1300 | 1423 | 0.91     | 0.477761 | 1300 | 1.00     | 0.998166 |
| 248420_at | A15f51560 | receptor-like protein kinase                | receptor-like protein kinase                  | 635  | 788  | 753  | 846  | 1007 | 674  | 725  | 843  | 0.86     | 0.333511 | 409  | 314  | 423  | 611  | 547  | 438  | 489  | 472  | 382  | 511  | 0.75     | 0.034863 | 532  | 0.72     | 0.069392 |
| 248421_at | A15f51510 | unknown protein                             | supported by full-length expressed protein    | 344  | 411  | 474  | 436  | 508  | 395  | 410  | 446  | 0.92     | 0.501505 | 448  | 489  | 486  | 655  | 548  | 506  | 481  | 475  | 474  | 533  | 0.89     | 0.241815 | 569  | 0.83     | 0.109608 |
| 248422_at | A15f51640 | cleavage and polyadenylation specific       | cleavage and polyadenylation specificity      | 317  | 417  | 381  | 466  | 512  | 381  | 372  | 453  | 0.82     | 0.166655 | 302  | 237  | 333  | 304  | 339  | 276  | 387  | 358  | 291  | 351  | 0.83     | 0.138201 | 336  | 0.86     | 0.363494 |
| 248423_at | A15f51670 | unknown protein                             | expressed protein                             | 35   | 49   | 50   | 53   | 52   | 50   | 45   | 52   | 0.86     | 0.198471 | 37   | 48   | 46   | 44   | 37   | 43   | 46   | 41   | 44   | 42   | 1.04     | 0.625463 | 41   | 1.06     | 0.557726 |
| 248424_at | A15f51680 | unknown protein                             | hydroxylproline-rich glycoprotein family p    | 41   | 37   | 42   | 43   | 46   | 44   | 40   | 44   | 0.91     | 0.097697 | 31   | 39   | 42   | 28   | 35   | 34   | 37   | 35   | 37   | 34   | 1.10     | 0.310743 | 32   | 1.16     | 0.253713 |
| 248425_at | A15f51690 | ADG synthase                                | 1-aminocyclopropane-1-carboxylate synthase    | 40   | 101  | 161  | 129  | 137  | 138  | 114  | 135  | 0.85     | 0.444340 | 40   | 38   | 47   | 44   | 37   | 39   | 48   | 48   | 42   | 43   | 0.96     | 0.887433 | 40   | 1.04     | 0.677925 |
| 248426_at | A15f51740 | putative protein contains similarity to     | peptidase M48 family protein                  | 143  | 164  | 159  | 218  | 229  | 191  | 155  | 212  | 0.73     | 0.011829 | 167  | 173  | 190  | 256  | 177  | 212  | 193  | 198  | 177  | 212  | 0.83     | 0.094280 | 216  | 0.82     | 0.167746 |
| 248427_at | A15f51750 | subtilisin-like serine protease similar to  | subtilase family protein                      | 3171 | 3426 | 3269 | 3704 | 4219 | 3336 | 3289 | 3753 | 0.88     | 0.156480 | 2815 | 2627 | 2992 | 3721 | 3411 | 2855 | 3466 | 3421 | 2811 | 3375 | 0.83     | 0.032827 | 3329 | 0.84     | 0.132284 |
| 248428_at | A15f51760 | protein choshatase-2C                       | PP2C-like serine choshatase 2C                | 50   | 56   | 77   | 167  | 79   | 78   | 61   | 108  | 0.56     | 0.199964 | 29   | 35   | 39   | 41   | 28   | 33   | 38   | 37   | 34   | 38   | 0.97     | 0.792187 | 34   | 1.01     | 0.928889 |
| 248429_at | A15f51770 | putative protein similar to unknown         | putative protein similar to unknown           | 289  | 342  | 362  | 313  | 348  | 308  | 331  | 323  | 1.03     | 0.759181 | 307  | 327  | 332  | 432  | 335  | 309  | 382  | 358  | 322  | 363  | 0.83     | 0.198006 | 359  | 0.90     | 0.387958 |
| 248430_at | A15f51800 | putative protein similar to unknown         | putative protein similar to unknown           | 26   | 38   | 48   | 60   | 64   | 61   | 37   | 62   | 0.60     | 0.019239 | 29   | 18   | 26   | 29   | 25   | 22   | 28   | 26   | 21   | 26   | 0.81     | 0.070265 | 25   | 0.83     | 0.233036 |
| 248431_at | A15f51810 | gibberellin 20-oxidase (emb)                | gibberellin 20-oxidase                        | 287  | 275  | 426  | 945  | 862  | 824  | 333  | 877  | 0.38     | 0.000771 | 1054 | 1091 | 1175 | 2356 | 1772 | 1857 | 1938 | 1914 | 1107 | 1968 | 0.56     | 0.000770 | 1959 | 0.55     | 0.008728 |
| 248432_at | A15f51850 | putative protein similar to unknown         | putative protein similar to unknown           | 141  | 160  | 176  | 290  | 339  | 242  | 159  | 290  | 0.55     | 0.011268 | 318  | 315  | 338  | 428  | 313  | 262  | 332  | 308  | 324  | 329  | 0.99     | 0.898220 | 334  | 0.97     | 0.838236 |
| 248433_at | A15f51860 | MADS box transcription factor-like          | MADS-box protein (AGL72)                      | 16   | 11   | 17   | 15   | 17   | 14   | 15   | 15   | 0.96     | 0.799894 | 12   | 8    | 12   | 11   | 11   | 10   | 11   | 10   | 11   | 10   | 1.00     | 0.991595 | 11   | 1.01     | 0.953694 |
| 248434_at | A15f51870 | MADS box transcription factor-like          | MADS-box protein (AGL71)                      | 24   | 24   | 34   | 39   | 50   | 41   | 38   | 33   | 0.75     | 0.128435 | 22   | 35   | 33   | 36   | 32   | 23   | 28   | 30   | 29   | 1.05 | 0.749411 | 31       | 0.98 | 0.807519 |          |
| 248435_at | A15f51880 | collasumolomate anticor-like protein        | collasumolomate anticor-like protein          | 183  | 169  | 183  | 140  | 169  | 183  | 169  | 183  | 0.86     | 0.239746 | 151  | 134  | 169  | 175  | 168  | 179  | 164  | 183  | 169  | 175  | 0.82     | 0.021000 | 179  | 0.85     | 0.044460 |
| 248436_at | A15f51880 | unknown protein                             | supported by full-length expressed protein    | 613  | 844  | 889  | 872  | 913  | 806  | 782  | 864  | 0.91     | 0.419639 | 714  | 789  | 794  | 1133 | 821  | 792  | 891  | 871  | 766  | 901  | 0.85     | 0.151520 | 915  | 0.84     | 0.253115 |
| 248437_at | A15f51720 | unknown protein                             | supported by full-length expressed protein    | 59   | 64   | 84   | 93   | 97   | 88   | 69   | 93   | 0.74     | 0.040838 | 83   | 70   | 94   | 132  | 99   | 85   | 149  | 133  | 82   | 120  | 0.69     | 0.064709 | 106  | 0.78     | 0.208988 |
| 248438_at | A15f51840 | unknown protein                             | supported by full-length expressed protein    | 72   | 220  | 195  | 276  | 308  | 237  | 196  | 274  | 0.72     | 0.034127 | 173  | 153  | 188  | 263  | 205  | 175  | 197  | 171  | 204  | 0.84 | 0.195702 | 214      | 0.80 | 0.192756 |          |
| 248439_at | A15f51700 | RAR1 (cdaA1843) 11 non-consensus            | RAR1 disease resistance protein               | 165  | 188  | 199  | 201  | 224  | 165  | 184  | 204  | 0.90     | 0.244184 | 220  | 247  | 240  | 334  | 265  | 258  | 233  | 236  | 265  | 288  | 0.89     | 0.291339 | 278  | 0.85     | 0.244460 |
| 248440_at | A15f51820 | phospholucumate (emb)                       | phospholucumate, chlorotact (PGM)             | 137  | 213  | 191  | 162  | 218  | 146  | 180  | 175  | 1.03     | 0.879984 | 144  | 142  | 136  | 146  | 132  | 130  | 131  | 135  | 141  | 135  | 1.04     | 0.218664 | 136  | 1.03     | 0.444109 |
| 248441_at | A15f51830 | fructokinase 1                              | fructokinase 1                                | 97   | 107  | 104  | 144  | 115  | 119  | 102  | 136  | 0.75     | 0.021800 | 127  | 127  | 130  | 174  | 130  | 116  | 134  | 121  | 128  | 135  | 0.95     | 0.628620 | 140  | 0.91     | 0.526636 |
| 248442_at | A15f51890 | peroxidase                                  | peroxidase-related                            | 114  | 130  | 161  | 240  | 300  | 265  | 135  | 268  | 0.50     | 0.003877 | 143  | 166  | 136  | 300  | 182  | 222  | 159  | 147  | 148  | 202  | 0.73     | 0.207077 | 235  | 0.63     | 0.073037 |
| 248443_at | A15f51900 | putative protein contains similarity to     | cytochrome P450 family                        | 17   | 18   | 16   | 26   | 20   | 19   | 17   | 19   | 0.79     | 0.116894 | 17   | 11   | 17   | 18   | 15   | 20   | 14   | 16   | 15   | 17   | 0.81     | 0.521840 | 18   | 0.85     | 0.371039 |
| 248444_at | A15f51930 | mandelonitrile lyase-like protein           | glucose-methanol-choline (GMC) oxidoreductase | 17   | 18   | 21   | 21   | 17   | 23   | 19   | 20   | 0.92     | 0.448461 | 22   | 19   | 23   | 20   | 22   | 26   | 21   | 21   | 22   | 0.98 | 0.836732 | 21       | 1.03 | 0.769139 |          |
| 248445_at | A15f51910 | putative protein contains similarity to     | DT1 TCP family transcription factor, putative | 259  | 401  | 391  | 289  | 338  | 250  | 350  | 292  | 1.20     | 0.332833 | 278  | 376  | 293  | 407  | 317  | 320  | 344  | 343  | 315  | 346  | 0.91     | 0.357251 | 348  | 0.90     | 0.482792 |
| 248446_at | A15f51940 | DNA-directed RNA polymerase II              | subunit DNA-directed RNA polymerase II        | 871  | 1080 | 1200 | 1293 | 1426 | 1206 | 1050 | 1308 | 0.80     | 0.089223 | 919  | 1090 | 1102 | 1515 | 1127 | 1023 | 1228 | 1248 | 1037 | 1228 | 0.84     | 0.155518 | 1222 | 0.85     | 0.315283 |
| 248447_at | A15f51960 | putative protein contains similarity to     | unknown protein                               | 181  | 221  | 256  | 241  | 286  | 230  | 219  | 252  | 0.87     | 0.304445 | 232  | 245  | 261  | 325  | 268  | 271  | 286  | 272  | 246  | 284  | 0.87     | 0.048625 | 288  | 0.85     | 0.036329 |
| 248448_at | A15f51980 | putative protein contains similarity to     | WD-40 repeat family protein                   | 195  | 241  | 293  | 373  | 456  | 320  | 244  | 383  | 0.63     | 0.043219 | 194  | 214  | 245  | 303  | 268  | 272  | 282  | 242  | 242  | 282  | 0.77     | 0.011917 | 282  | 0.75     | 0.020509 |
| 248449_at | A15f51990 | AP2 domain transcription factor-like        | AP2 domain transcription factor               | 35   | 43   | 60   | 59   | 58   | 49   | 46   | 55   | 0.83     | 0.313270 | 25   | 20   | 35   | 31   | 30   | 28   | 33   | 28   | 27   | 30   | 0.90     | 0.436840 | 29   | 0.92     | 0.612000 |
| 248450_at | A15f52000 | importin alpha subunit                      | importin alpha-1 subunit, putative            | 29   | 32   | 46   | 43   | 46   | 42   | 36   | 44   | 0.82     | 0.215906 | 21   | 21   | 30   | 23   | 21   | 21   | 21   | 21   | 21   | 21   | 1.13     | 0.261629 | 21   | 1.12     | 0.439471 |
| 248451_at | A15f52030 | putative protein similar to unknown         | putative protein similar to unknown           | 93   | 135  | 138  | 145  | 167  | 131  | 122  | 148  | 0.83     | 0.222070 | 133  | 133  | 143  | 205  | 188  | 161  | 175  | 162  | 136  | 178  | 0.77     | 0.014014 | 184  | 0.74     | 0.022469 |
| 248452_at | A15f52050 | integral membrane protein-like              | MATE efflux protein-related                   | 50   | 56   | 58   | 74   | 59   | 50   | 46   | 58   | 0.79     | 0.086622 | 40   | 26   | 3    |      |      |      |      |      |      |      |          |          |      |          |          |

|            |             |                                            |                                                          |      |      |      |      |      |      |      |          |          |          |      |      |      |      |      |      |          |      |      |          |          |          |      |          |          |
|------------|-------------|--------------------------------------------|----------------------------------------------------------|------|------|------|------|------|------|------|----------|----------|----------|------|------|------|------|------|------|----------|------|------|----------|----------|----------|------|----------|----------|
| 248311_at  | A1f5g25270  | beta-carotene hydroxylase                  | beta-carotene hydroxylase, putative                      | 83   | 100  | 165  | 130  | 129  | 138  | 116  | 132      | 0.88     | 0.550224 | 67   | 72   | 85   | 82   | 78   | 69   | 82       | 84   | 74   | 79       | 0.94     | 0.412379 | 76   | 0.97     | 0.781187 |
| 248312_at  | A1f5g25280  | unknown protein                            | hypothetical protein // RabGAP/TBC do                    | 84   | 102  | 102  | 131  | 134  | 101  | 96   | 122      | 0.79     | 0.093687 | 51   | 45   | 51   | 57   | 51   | 59   | 60       | 59   | 49   | 57       | 0.86     | 0.017503 | 56   | 0.88     | 0.091609 |
| 248313_at  | A1f5g25290  | outative protein contains similarity to G  | RabGAP/TBC domain-containing prote                       | 272  | 339  | 367  | 364  | 398  | 332  | 328  | 365      | 0.88     | 0.322752 | 240  | 210  | 265  | 315  | 253  | 226  | 314      | 303  | 239  | 282      | 0.85     | 0.154290 | 265  | 0.90     | 0.445707 |
| 248314_at  | A1f5g25300  | outative protein similar to unknown prot   | putative protein                                         | 20   | 27   | 25   | 25   | 24   | 24   | 29   | 1.01     | 0.036911 | 20       | 27   | 25   | 25   | 19   | 18   | 20   | 19       | 20   | 20   | 19       | 1.51     | 0.046098 | 20   | 0.92     | 0.065156 |
| 248315_at  | A1f5g25303  | selenium-binding protein-like              | pentatricarboxide (PPR) repeat-containi                  | 42   | 67   | 65   | 60   | 75   | 54   | 58   | 63       | 0.93     | 0.689919 | 60   | 47   | 56   | 78   | 64   | 66   | 68       | 65   | 54   | 68       | 0.80     | 0.018075 | 69   | 0.78     | 0.059328 |
| 248316_at  | A1f5g25270  | putative protein similar to unknown prot   | heavy-metal-associated domain-contain                    | 10   | 11   | 15   | 15   | 18   | 19   | 12   | 17       | 0.71     | 0.080766 | 18   | 12   | 13   | 13   | 11   | 12   | 15       | 15   | 14   | 13       | 1.09     | 0.515091 | 12   | 1.19     | 0.277996 |
| 248317_at  | A1f5g252680 | unknown protein                            | heavy-metal-associated domain-contain                    | 12   | 9    | 8    | 7    | 8    | 7    | 10   | 7        | 1.30     | 0.124462 | 11   | 15   | 9    | 12   | 9    | 10   | 14       | 10   | 12   | 11       | 1.05     | 0.745251 | 10   | 1.12     | 0.571110 |
| 248318_at  | A1f5g252690 | unknown protein                            | heavy-metal-associated domain-contain                    | 12   | 8    | 14   | 9    | 9    | 10   | 11   | 1.22     | 0.268207 | 10       | 10   | 14   | 10   | 14   | 11   | 11   | 10       | 14   | 10   | 12       | 1.01     | 0.951254 | 12   | 0.95     | 0.246535 |
| 248319_at  | A1f5g252710 | unknown protein                            | heavy-metal-associated domain-contain                    | 29   | 39   | 34   | 43   | 51   | 39   | 34   | 44       | 0.76     | 0.086429 | 26   | 37   | 42   | 36   | 32   | 31   | 30       | 37   | 35   | 33       | 1.05     | 0.657578 | 33   | 1.05     | 0.732075 |
| 248320_at  | A1f5g252720 | outative protein similar to unknown prot   | heavy-metal-associated domain-contain                    | 14   | 8    | 9    | 9    | 8    | 9    | 10   | 9        | 1.19     | 0.423237 | 9    | 20   | 12   | 13   | 11   | 8    | 17       | 9    | 14   | 11       | 1.21     | 0.476185 | 11   | 1.31     | 0.407609 |
| 248321_at  | A1f5g252740 | outative protein similar to unknown prot   | heavy-metal-associated domain-contain                    | 16   | 14   | 13   | 16   | 21   | 18   | 14   | 18       | 0.78     | 0.062070 | 14   | 19   | 16   | 13   | 11   | 12   | 14       | 10   | 12   | 14       | 1.39     | 0.014113 | 12   | 1.38     | 0.032302 |
| 248322_at  | A1f5g252760 | outative protein similar to unknown prot   | heavy-metal-associated domain-contain                    | 21   | 25   | 22   | 16   | 22   | 19   | 22   | 19       | 1.21     | 0.156907 | 12   | 12   | 11   | 6    | 12   | 10   | 10       | 12   | 10   | 12       | 1.08     | 0.272482 | 9    | 1.28     | 0.221628 |
| 248323_at  | A1f5g252770 | unknown protein                            | heavy-metal-associated protein-related                   | 30   | 28   | 34   | 33   | 29   | 26   | 32   | 0.82     | 0.113866 | 18       | 24   | 29   | 26   | 19   | 22   | 25   | 29       | 24   | 24   | 0.98     | 0.877748 | 23       | 1.05 | 0.768073 |          |
| 248324_at  | A1f5g252790 | putative protein similar to unknown prot   | CBS domain-containing protein-related                    | 40   | 47   | 73   | 56   | 66   | 56   | 54   | 59       | 0.90     | 0.619307 | 28   | 31   | 39   | 41   | 25   | 35   | 43       | 40   | 33   | 37       | 0.89     | 0.430256 | 34   | 0.97     | 0.867178 |
| 248325_at  | A1f5g252800 | unknown protein                            | expressed protein                                        | 40   | 46   | 48   | 48   | 55   | 44   | 45   | 49       | 0.91     | 0.336639 | 27   | 31   | 36   | 30   | 23   | 28   | 30       | 32   | 31   | 29       | 1.09     | 0.403146 | 27   | 1.16     | 0.261231 |
| 248326_at  | A1f5g252820 | Notchless protein homolog                  | WD-40 repeat family protein / notchless                  | 301  | 356  | 468  | 388  | 443  | 328  | 375  | 386      | 0.97     | 0.864449 | 353  | 326  | 329  | 477  | 371  | 384  | 425      | 386  | 336  | 408      | 0.82     | 0.034897 | 411  | 0.82     | 0.097657 |
| 248327_at  | A1f5g252750 | outative protein similar to unknown prot   | heavy-metal-associated domain-contain                    | 40   | 40   | 40   | 42   | 47   | 43   | 40   | 44       | 0.91     | 0.041691 | 16   | 23   | 35   | 30   | 29   | 31   | 50       | 25   | 34   | 0.74     | 0.234980 | 29       | 0.85 | 0.459764 |          |
| 248328_at  | A1f5g252660 | outative protein contains similarity to M  | myb family transcription factor                          | 95   | 144  | 168  | 179  | 191  | 155  | 136  | 175      | 0.78     | 0.180307 | 130  | 159  | 149  | 213  | 165  | 154  | 151      | 146  | 169  | 0.86     | 0.195251 | 180      | 0.81 | 0.129550 |          |
| 248329_at  | A1f5g252780 | putative protein similar to unknown prot   | expressed protein                                        | 28   | 51   | 35   | 48   | 39   | 33   | 38   | 40       | 0.94     | 0.790603 | 30   | 46   | 33   | 78   | 56   | 55   | 74       | 64   | 36   | 65       | 0.55     | 0.006121 | 63   | 0.58     | 0.038715 |
| 248330_at  | A1f5g252810 | putative protein contains similarity to or | onithine cyclodeaminase/mu-crystallin f                  | 87   | 115  | 123  | 139  | 136  | 122  | 109  | 132      | 0.82     | 0.125993 | 93   | 76   | 93   | 146  | 100  | 115  | 100      | 108  | 87   | 114      | 0.77     | 0.073755 | 120  | 0.73     | 0.090271 |
| 248331_at  | A1f5g252650 | putative protein                           | supports 14C AOS ribosomal protein S10 (RPS10C)          | 2740 | 3318 | 3219 | 3322 | 3672 | 3307 | 3092 | 3434     | 0.90     | 0.187018 | 2813 | 3241 | 3191 | 3970 | 3253 | 3296 | 3290     | 3315 | 3082 | 3345     | 0.92     | 0.336695 | 3373 | 0.91     | 0.444022 |
| 248332_at  | A1f5g252640 | heat-shock protein                         | supported by cDN heat shock protein 81-1 (HSP81-1) / hes | 115  | 181  | 107  | 203  | 632  | 228  | 134  | 354      | 0.38     | 0.193484 | 83   | 67   | 103  | 86   | 54   | 59   | 86       | 82   | 84   | 73       | 1.15     | 0.400936 | 67   | 1.27     | 0.283953 |
| 248333_at  | A1f5g252660 | unknown protein similar to unknown prot    | UDP-N-acetylglucosamine oxohydrosho                      | 218  | 258  | 280  | 363  | 407  | 288  | 252  | 353      | 0.71     | 0.061297 | 232  | 199  | 224  | 338  | 265  | 226  | 235      | 226  | 218  | 16592    | 0.81     | 0.224272 | 276  | 0.79     | 0.159521 |
| 248336_at  | A1f5g252830 | unknown protein                            | supported by cDNA: VWRKY family transcription factor     | 303  | 50   | 49   | 49   | 59   | 46   | 44   | 51       | 0.86     | 0.328027 | 42   | 43   | 41   | 44   | 38   | 41   | 48       | 40   | 42   | 42       | 0.99     | 0.884149 | 44   | 1.02     | 0.633445 |
| 248337_at  | A1f5g252850 | selenium-binding protein-like              | pentatricarboxide (PPR) repeat-containi                  | 57   | 64   | 73   | 64   | 60   | 78   | 65   | 81       | 0.81     | 0.037572 | 58   | 51   | 64   | 77   | 69   | 57   | 71       | 66   | 58   | 68       | 0.85     | 0.086140 | 66   | 0.85     | 0.216984 |
| 2483277_at | A1f5g252860 | ABC transporter family protein             | ABC transporter family protein                           | 233  | 232  | 250  | 442  | 408  | 350  | 228  | 400      | 0.57     | 0.004843 | 167  | 147  | 200  | 352  | 256  | 251  | 269      | 262  | 171  | 278      | 0.82     | 0.007883 | 287  | 0.60     | 0.033501 |
| 248278_at  | A1f5g252890 | putative protein similar to unknown prot   | AT hook motif-containing protein                         | 54   | 60   | 67   | 69   | 75   | 63   | 60   | 69       | 0.87     | 0.162692 | 44   | 41   | 50   | 55   | 45   | 41   | 58       | 59   | 45   | 51       | 0.88     | 0.280377 | 47   | 0.97     | 0.776294 |
| 248279_at  | A1f5g252910 | outative protein similar to unknown prot   | timeless family protein                                  | 113  | 127  | 129  | 144  | 145  | 120  | 123  | 136      | 0.90     | 0.223379 | 84   | 84   | 97   | 110  | 89   | 81   | 91       | 85   | 88   | 92       | 0.96     | 0.678516 | 94   | 0.94     | 0.618059 |
| 248280_at  | A1f5g252950 | outative protein similar to unknown prot   | expressed protein                                        | 79   | 85   | 76   | 98   | 93   | 78   | 80   | 90       | 0.89     | 0.194293 | 58   | 45   | 61   | 75   | 64   | 57   | 56       | 55   | 51   | 81       | 0.89     | 0.311698 | 65   | 0.84     | 0.220343 |
| 248281_at  | A1f5g252900 | unknown protein                            | supported by full-len expressed protein                  | 298  | 267  | 277  | 244  | 290  | 274  | 259  | 290      | 0.85     | 0.137875 | 266  | 245  | 249  | 409  | 272  | 265  | 330      | 380  | 317  | 260      | 0.92     | 0.077515 | 322  | 0.91     | 0.201729 |
| 248282_at  | A1f5g252900 | unknown protein                            | supported by full-len expressed protein                  | 27   | 30   | 37   | 33   | 42   | 37   | 31   | 38       | 0.84     | 0.184907 | 42   | 33   | 40   | 34   | 36   | 45   | 40       | 42   | 38   | 39       | 0.97     | 0.741110 | 38   | 1.00     | 0.979906 |
| 248283_at  | A1f5g252920 | pyruvate kinase                            | supported by full-len pyruvate kinase, putative          | 698  | 1038 | 1017 | 1295 | 1254 | 993  | 984  | 1181     | 0.83     | 0.133146 | 837  | 696  | 1021 | 1367 | 1206 | 938  | 1157     | 1074 | 851  | 1148     | 0.74     | 0.044265 | 1170 | 0.73     | 0.111252 |
| 248284_at  | A1f5g252975 | Expressed protein                          | supported by full-le expressed protein                   | 848  | 1771 | 850  | 80   | 90   | 75   | 755  | 81       | 0.27     | 0.003553 | 440  | 354  | 415  | 45   | 53   | 49   | 54       | 45   | 40   | 43       | 8.20     | 0.000001 | 49   | 8.24     | 0.000162 |
| 248285_at  | A1f5g252960 | outative protein similar to unknown prot   | expressed protein                                        | 123  | 172  | 194  | 151  | 143  | 141  | 116  | 0.437452 | 167      | 179      | 189  | 229  | 182  | 178  | 209  | 0.89 | 0.198988 | 174  | 0.89 | 0.306960 |          |          |      |          |          |
| 248286_at  | A1f5g252870 | outative protein similar to unknown prot   | expressed protein                                        | 60   | 75   | 74   | 85   | 105  | 77   | 70   | 89       | 0.78     | 0.123497 | 55   | 49   | 59   | 106  | 78   | 65   | 74       | 67   | 54   | 78       | 0.70     | 0.057030 | 63   | 0.66     | 0.084455 |
| 248287_at  | A1f5g252970 | outative protein similar to unknown prot   | thylakoid lumen 15.0 kDa protein                         | 119  | 202  | 183  | 198  | 206  | 157  | 168  | 187      | 0.90     | 0.556561 | 168  | 197  | 209  | 256  | 185  | 195  | 180      | 184  | 191  | 200      | 0.96     | 0.689708 | 212  | 0.90     | 0.459363 |
| 248288_at  | A1f5g252840 | unknown protein                            | supported by cDNA: NADH-ubiquinone oxidoreductase-relate | 1047 | 1283 | 1314 | 1453 | 1542 | 1419 | 1215 | 1471     | 0.83     | 0.049412 | 1554 | 1717 | 1745 | 2194 | 1747 | 1624 | 1634     | 1644 | 1672 | 1769     | 0.95     | 0.547606 | 1855 | 0.90     | 0.375071 |
| 248289_at  | A1f5g253080 | outative protein                           | supported by cDNA: F-box family protein                  | 174  | 218  | 224  | 254  | 269  | 244  | 249  | 249      | 0.82     | 0.005956 | 211  | 207  | 251  | 326  | 251  | 246  | 261      | 246  | 233  | 265      | 0.93     | 0.066577 | 276  | 0.91     | 0.176200 |
| 248290_at  | A1f5g253010 | Ca2+-transporting ATPase-like protein      | calcium-transporting ATPase, putative                    | 53   | 70   | 84   | 103  | 125  | 95   | 69   | 108      | 0.64     | 0.036567 | 65   | 69   | 75   | 112  | 95   | 81   | 107      | 98   | 70   | 99       | 0.70     | 0.007995 | 96   | 0.72     | 0.048785 |
| 248291_at  | A1f5g253020 | outative protein similar to unknown prot   | expressed protein                                        | 65   | 95   | 91   | 115  | 129  | 100  | 84   | 115      | 0.73     | 0.070921 | 68   | 67   | 75   | 114  | 107  | 79   | 106      | 94   | 70   | 100      | 0.70     | 0.010387 | 100  | 0.70     | 0.047898 |
| 248292_at  | A1f5g253030 | outative protein similar to unknown prot   | expressed protein                                        | 25   | 21   | 32   | 28   | 26   | 33   | 26   | 29       | 0.90     | 0.502546 | 19   | 31   | 25   | 31   | 20   | 21   | 33       | 26   | 25   | 26       | 0.94     | 0.730216 | 24   | 1.02     | 0.923829 |
| 248293_at  | A1f5g253050 | unknown protein                            | hydrolase, alpha/beta fold family protein                | 75   | 101  | 113  | 108  | 123  | 103  | 96   | 111      | 0.87     | 0.132255 | 61   | 53   | 75   | 83   | 65   | 71   | 87       | 73   | 63   | 79       | 0.50     | 0.111907 | 76   | 0.63     | 0.228462 |
| 248294_at  | A1f5g253060 | RNA-binding protein-like                   | RNA-binding protein-like                                 | 154  | 194  | 181  | 194  | 265  | 212  | 184  | 246      | 0.75     | 0.037257 | 145  | 139  | 174  | 245  | 196  | 166  | 190      | 179  | 168  | 190      | 0.79     | 0.068300 | 204  | 0.76     | 0.040539 |
| 248295_at  | A1f5g253070 | putative protein contains similarity to ri | ribosomal protein L9 family protein                      | 163  | 193  | 184  | 202  | 224  | 181  | 180  | 202      | 0.89     | 0.220847 | 97   | 78   | 91   | 112  | 113  | 90   | 115      | 103  | 89   | 107      | 0.83     | 0.046894 | 105  | 0.84     | 0.147595 |
| 248296_at  | A1f5g253090 | protochlorophyllide reductase; oxidorec    | oxidoreductase, putative                                 | 81   | 108  | 91   | 109  | 135  | 97   | 93   | 114      | 0.82     | 0.212405 | 111  | 112  | 117  | 145  | 124  | 113  | 147      | 136  | 113  | 133      | 0.85     | 0.065212 | 127  | 0.89     | 0.218893 |
| 248297_at  | A1f5g253100 | protochlorophyllide reductase; oxidorec    | oxidoreductase, putative                                 | 20   | 22   | 27   | 27   | 37   | 30   | 23   | 32       | 0.72     | 0.062633 | 13   | 16   | 24   | 19   | 17   | 16   | 14       | 23   | 18   | 18       | 0.99     | 0.076877 | 17   | 1.02     | 0.925838 |
| 248298_at  | A1f5g253110 | outative protein similar to unknown prot   | expressed protein                                        | 36   | 48   | 51   | 60   | 65   | 47   | 48   | 62       | 0.83     | 0.097375 | 43   | 47   | 50   | 47   | 60   | 67   | 68       | 69   | 68   | 69       | 0.69     | 0.008691 | 69   | 0.67     | 0.032640 |
| 248299_at  | A1f5g253080 | unknown protein                            | supported by full-len kinase light chain-related         | 130  | 125  | 138  | 150  | 99   | 117  |      |          |          |          |      |      |      |      |      |      |          |      |      |          |          |          |      |          |          |

|           |           |                                                                                      |      |      |      |     |      |     |      |      |          |          |     |     |      |      |      |      |       |      |      |      |          |          |          |          |          |          |
|-----------|-----------|--------------------------------------------------------------------------------------|------|------|------|-----|------|-----|------|------|----------|----------|-----|-----|------|------|------|------|-------|------|------|------|----------|----------|----------|----------|----------|----------|
| 248222_21 | A1f5g3620 | unknown protein ; supported by cDNA: expressed protein                               | 722  | 823  | 883  | 935 | 1072 | 856 | 809  | 954  | 0.85     | 0.139414 | 736 | 631 | 798  | 984  | 910  | 752  | 860   | 812  | 721  | 864  | 0.84     | 0.067520 | 882      | 0.82     | 0.127867 |          |
| 248223_41 | A1f5g3490 | thylakoid lumenal 17.4 kD protein, chlo: thylakoid lumenal 17.4 kDa protein, chlo    | 226  | 443  | 427  | 302 | 329  | 240 | 365  | 290  | 1.26     | 0.370603 | 250 | 273 | 283  | 353  | 265  | 261  | 281   | 275  | 269  | 287  | 0.94     | 0.475014 | 293      | 0.92     | 0.409585 |          |
| 248225_21 | A1f5g3740 | unknown protein                                                                      | 166  | 150  | 187  | 73  | 71   | 71  | 168  | 72   | 2.33     | 0.000851 | 104 | 105 | 124  | 50   | 62   | 47   | 55    | 48   | 111  | 52   | 2.13     | 0.000085 | 53       | 2.11     | 0.001883 |          |
| 248226_21 | A1f5g3750 | putative protein strong similarity to unknown dro: hypothetical protein              | 139  | 131  | 177  | 209 | 223  | 191 | 149  | 205  | 0.72     | 0.072399 | 195 | 162 | 186  | 179  | 280  | 290  | 286   | 290  | 286  | 290  | 0.63     | 0.001526 | 271      | 0.61     | 0.008916 |          |
| 248227_21 | A1f5g3820 | ABA-inducible protein-like: supported i                                              | 24   | 16   | 12   | 21  | 19   | 19  | 21   | 20   | 1.05     | 0.732623 | 15  | 16  | 18   | 12   | 15   | 21   | 16    | 16   | 15   | 15   | 1.05     | 0.739239 | 13       | 1.24     | 0.082435 |          |
| 248228_21 | A1f5g3800 | unknown protein ; supported by full-len expressed protein                            | 251  | 331  | 322  | 336 | 351  | 333 | 301  | 340  | 0.89     | 0.215370 | 307 | 297 | 300  | 447  | 301  | 303  | 339   | 307  | 301  | 339  | 0.89     | 0.344560 | 350      | 0.86     | 0.367964 |          |
| 248229_21 | A1f5g3810 | caffeic acid 3-O-methyltransferase-like -O-methyltransferase, putative               | 25   | 34   | 38   | 40  | 37   | 36  | 32   | 38   | 0.85     | 0.235027 | 21  | 26  | 31   | 23   | 19   | 22   | 22    | 21   | 26   | 21   | 1.21     | 0.102085 | 21       | 1.22     | 0.220289 |          |
| 248230_21 | A1f5g3830 | putative protein similar to unknown dro: unknown dro: unknown dro                    | 41   | 51   | 68   | 54  | 44   | 65  | 65   | 65   | 0.69     | 0.036953 | 36  | 41  | 45   | 73   | 65   | 64   | 65    | 64   | 65   | 64   | 0.63     | 0.000758 | 65       | 0.62     | 0.000965 |          |
| 248231_21 | A1f5g3770 | putative protein contains similarity to u nucleotidyltransferase family protein      | 113  | 155  | 147  | 157 | 151  | 160 | 138  | 156  | 0.89     | 0.255405 | 137 | 161 | 186  | 231  | 174  | 148  | 177   | 162  | 161  | 178  | 0.90     | 0.455320 | 184      | 0.88     | 0.466304 |          |
| 248232_21 | A1f5g3760 | unknown protein contains similarity to sa seven transmembrane MLO family prote       | 196  | 229  | 241  | 433 | 427  | 377 | 222  | 122  | 0.54     | 0.001025 | 261 | 225 | 270  | 525  | 474  | 348  | 497   | 476  | 252  | 464  | 0.54     | 0.002255 | 449      | 0.56     | 0.022086 |          |
| 248233_21 | A1f5g3840 | F-box protein family. AtFBL13 contains F-box domain protein (FBL13)                  | 28   | 33   | 35   | 32  | 42   | 36  | 32   | 37   | 0.88     | 0.245952 | 28  | 29  | 32   | 23   | 23   | 29   | 21    | 25   | 30   | 24   | 1.23     | 0.029528 | 25       | 1.20     | 0.100342 |          |
| 248234_21 | A1f5g3850 | unknown protein contains similarity to er halocacid dehalogenase-like hydrolase fa   | 496  | 539  | 682  | 767 | 877  | 670 | 572  | 771  | 0.74     | 0.072379 | 660 | 646 | 719  | 961  | 813  | 811  | 767   | 675  | 817  | 817  | 0.83     | 0.040474 | 836      | 0.81     | 0.058575 |          |
| 248235_21 | A1f5g3860 | unknown protein ; supported by full-len expressed protein                            | 350  | 474  | 432  | 450 | 365  | 419 | 445  | 454  | 0.94     | 0.000021 | 414 | 412 | 425  | 574  | 485  | 438  | 467   | 456  | 417  | 484  | 0.86     | 0.082827 | 498      | 0.84     | 0.114870 |          |
| 248236_21 | A1f5g3870 | putative protein contains similarity to pt plastocyanin-like domain-containing prot  | 1097 | 1164 | 1447 | 64  | 58   | 58  | 1236 | 60   | 20.65    | 0.000394 | 591 | 659 | 710  | 173  | 112  | 134  | 212   | 196  | 653  | 165  | 3.95     | 0.000009 | 140      | 4.68     | 0.000191 |          |
| 248237_21 | A1f5g3890 | receptor protein kinase-like protein: leucine-rich repeat transmembrane prot         | 115  | 165  | 180  | 212 | 244  | 160 | 153  | 205  | 0.75     | 0.173183 | 94  | 89  | 90   | 118  | 110  | 100  | 120   | 117  | 91   | 113  | 0.80     | 0.004565 | 109      | 0.83     | 0.026456 |          |
| 248238_21 | A1f5g3900 | putative protein similar to unknown dro: expressed protein                           | 151  | 223  | 195  | 215 | 233  | 168 | 190  | 206  | 0.82     | 0.604533 | 140 | 134 | 145  | 253  | 185  | 182  | 161   | 140  | 195  | 0.72 | 0.036894 | 210      | 0.66     | 0.031507 |          |          |
| 248239_21 | A1f5g3920 | ribosomal protein L11 methyltransferase: ribosomal protein L11 methyltransferase     | 52   | 61   | 70   | 57  | 65   | 55  | 61   | 59   | 1.04     | 0.725778 | 52  | 62  | 80   | 87   | 90   | 86   | 79    | 82   | 81   | 85   | 0.96     | 0.245120 | 88       | 0.93     | 0.005541 |          |
| 248240_21 | A1f5g3950 | CUC2 (dbjBA19529.1) ; no apical meristem (NAM) family protein                        | 193  | 234  | 246  | 176 | 239  | 188 | 224  | 201  | 1.12     | 0.095444 | 266 | 252 | 289  | 136  | 114  | 100  | 103   | 97   | 269  | 110  | 2.45     | 0.000013 | 117      | 2.31     | 0.000540 |          |
| 248241_21 | A1f5g3960 | unknown protein                                                                      | 12   | 15   | 17   | 16  | 16   | 16  | 14   | 16   | 0.89     | 0.318616 | 14  | 23  | 15   | 15   | 15   | 13   | 13    | 18   | 14   | 1.30 | 0.119041 | 14       | 1.25     | 0.301183 |          |          |
| 248207_21 | A1f5g3970 | tyrosine aminotransferase                                                            | 29   | 32   | 49   | 41  | 46   | 39  | 37   | 42   | 0.87     | 0.449916 | 31  | 31  | 37   | 34   | 33   | 27   | 42    | 32   | 33   | 34   | 0.99     | 0.902815 | 31       | 1.06     | 0.588265 |          |
| 248208_21 | A1f5g3980 | unknown protein ; supported by full-len expressed protein                            | 20   | 24   | 30   | 22  | 26   | 23  | 25   | 23   | 1.06     | 0.691010 | 17  | 19  | 23   | 20   | 18   | 20   | 19    | 19   | 20   | 15   | 1.05     | 0.494462 | 19       | 1.05     | 0.620765 |          |
| 248209_21 | A1f5g3990 | flavonol 3-O-glucosyltransferase-like or glycosyltransferase family protein          | 16   | 15   | 16   | 18  | 17   | 19  | 16   | 18   | 0.86     | 0.019668 | 9   | 12  | 14   | 13   | 15   | 12   | 13    | 11   | 12   | 13   | 0.91     | 0.447868 | 14       | 0.86     | 0.335441 |          |
| 248210_21 | A1f5g4000 | ethylvine alcohol-enzyme-like dioxygen oxidoreductase, 2OG-Fe(II) oxoanase I         | 13   | 14   | 16   | 39  | 17   | 14  | 14   | 23   | 0.62     | 0.321876 | 16  | 20  | 17   | 18   | 22   | 16   | 19    | 17   | 18   | 18   | 0.88     | 0.855497 | 19       | 0.96     | 0.789118 |          |
| 248211_21 | A1f5g4010 | flavonol 3-O-glucosyltransferase-like or glycosyltransferase family protein          | 33   | 48   | 55   | 54  | 53   | 60  | 45   | 55   | 0.82     | 0.220788 | 31  | 34  | 42   | 36   | 30   | 31   | 52    | 38   | 36   | 37   | 0.95     | 0.753187 | 33       | 1.09     | 0.469023 |          |
| 248212_21 | A1f5g4020 | CHP-rich zinc finger protein-like ; expressed protein                                | 29   | 33   | 39   | 31  | 38   | 36  | 34   | 35   | 0.95     | 0.653918 | 28  | 25  | 32   | 22   | 27   | 29   | 30    | 27   | 28   | 27   | 1.04     | 0.657092 | 26       | 1.08     | 0.463771 |          |
| 248182_21 | A1f5g4030 | putative protein contains similarity to Cl DC1 domain-containing protein             | 19   | 24   | 26   | 25  | 37   | 26  | 23   | 29   | 0.78     | 0.204278 | 13  | 15  | 16   | 15   | 16   | 9    | 20    | 17   | 14   | 15   | 0.94     | 0.733289 | 13       | 1.09     | 0.635457 |          |
| 248183_21 | A1f5g4040 | CHP-rich zinc finger protein-like ; DC1 domain-containing protein                    | 19   | 19   | 35   | 31  | 33   | 28  | 24   | 30   | 0.80     | 0.311305 | 38  | 30  | 34   | 28   | 35   | 37   | 30    | 37   | 34   | 34   | 1.01     | 0.930642 | 34       | 1.01     | 0.942993 |          |
| 248184_21 | A1f5g4050 | CHP-rich zinc finger protein-like ; DC1 domain-containing protein                    | 20   | 26   | 26   | 29  | 34   | 33  | 24   | 32   | 0.76     | 0.037763 | 22  | 19  | 27   | 21   | 21   | 25   | 27    | 23   | 23   | 23   | 0.99     | 0.898430 | 21       | 1.08     | 0.508808 |          |
| 248185_21 | A1f5g4060 | flavonol 3-O-glucosyltransferase-like ; glycosyltransferase family protein           | 45   | 50   | 74   | 69  | 54   | 60  | 57   | 71   | 0.80     | 0.286234 | 41  | 34  | 47   | 42   | 35   | 44   | 42    | 44   | 41   | 41   | 0.98     | 0.834012 | 40       | 1.01     | 0.948137 |          |
| 248186_21 | A1f5g4080 | unknown protein ; supported by full-len expressed protein                            | 569  | 589  | 638  | 678 | 635  | 47  | 747  | 0.62 | 0.029438 | 729      | 717 | 707 | 1308 | 1162 | 1022 | 1227 | 1128  | 1087 | 1168 | 1168 | 0.64     | 0.000777 | 1168     | 0.61     | 0.006925 |          |
| 248187_21 | A1f5g3940 | zinc-binding protein-like ; supported by yippe family protein                        | 192  | 289  | 296  | 326 | 378  | 304 | 259  | 336  | 0.77     | 0.128308 | 279 | 334 | 321  | 490  | 360  | 361  | 329   | 308  | 311  | 370  | 0.84     | 0.232060 | 414      | 0.77     | 0.116206 |          |
| 248188_21 | A1f5g4070 | putative protein contains similarity to he heat shock transcription factor family pr | 188  | 216  | 137  | 54  | 26   | 17  | 19   | 32   | 0.58     | 0.288072 | 14  | 19  | 13   | 22   | 13   | 14   | 18    | 16   | 16   | 17   | 0.93     | 0.641755 | 16       | 0.94     | 0.789714 |          |
| 248189_21 | A1f5g4080 | DNA mismatch repair protein MutS2-like DNA mismatch repair MutS family protei        | 105  | 146  | 134  | 114 | 139  | 106 | 128  | 120  | 0.17     | 0.606919 | 112 | 106 | 115  | 129  | 120  | 107  | 138   | 123  | 111  | 125  | 0.89     | 0.132642 | 122      | 0.91     | 0.324553 |          |
| 248190_21 | A1f5g4120 | unknown protein                                                                      | 34   | 48   | 50   | 73  | 82   | 59  | 46   | 59   | 0.64     | 0.046601 | 35  | 34  | 40   | 55   | 45   | 45   | 54    | 43   | 37   | 49   | 0.75     | 0.015709 | 48       | 0.75     | 0.035529 |          |
| 248191_21 | A1f5g4130 | putative protein similar to unknown dro: expressed protein // calcium-binding EF     | 56   | 78   | 75   | 92  | 105  | 86  | 70   | 94   | 0.74     | 0.049923 | 66  | 60  | 76   | 93   | 85   | 78   | 77    | 80   | 67   | 83   | 0.81     | 0.023420 | 85       | 0.79     | 0.042976 |          |
| 248192_21 | A1f5g4140 | IAA-amino acid hydrolase homolog ILL: IAA-amino acid hydrolase, outative (ILL)       | 182  | 216  | 223  | 219 | 235  | 176 | 207  | 210  | 0.98     | 0.891509 | 184 | 184 | 191  | 273  | 247  | 204  | 239   | 204  | 186  | 233  | 0.80     | 0.038012 | 241      | 0.77     | 0.053480 |          |
| 248193_21 | A1f5g4080 | homocysteinate 1,2-dioxygenase ; susp: homocysteinate 1,2-dioxygenase / homoc        | 296  | 458  | 626  | 322 | 379  | 265 | 460  | 322  | 1.43     | 0.241634 | 335 | 419 | 319  | 432  | 384  | 355  | 482   | 461  | 358  | 423  | 0.85     | 0.142658 | 390      | 0.92     | 0.438085 |          |
| 248194_21 | A1f5g4095 | Expressed protein ; supported by full-len expressed protein                          | 50   | 37   | 53   | 26  | 34   | 50  | 50   | 27   | 1.89     | 0.041525 | 17  | 27  | 21   | 16   | 12   | 22   | 13    | 12   | 15   | 14   | 1.21     | 0.014972 | 17       | 1.28     | 0.520965 |          |
| 248195_21 | A1f5g4110 | membrane associated protein ; supoor vesicle-associated membrane family pr           | 190  | 269  | 281  | 303 | 308  | 255 | 247  | 289  | 0.85     | 0.274332 | 220 | 251 | 263  | 368  | 265  | 277  | 271   | 295  | 245  | 301  | 0.81     | 0.063432 | 313      | 0.78     | 0.087723 |          |
| 248196_21 | A1f5g4150 | putative protein similar to unknown dro: expressed protein                           | 33   | 34   | 49   | 32  | 39   | 34  | 39   | 35   | 1.10     | 0.560770 | 38  | 39  | 42   | 31   | 34   | 31   | 38    | 31   | 40   | 33   | 1.21     | 0.011505 | 32       | 1.25     | 0.006052 |          |
| 248197_21 | A1f5g4190 | NADPH:horcholorchlorohide oxidoreduct: prochlorohlorohide reductase A, chloroc       | 60   | 85   | 97   | 61  | 75   | 66  | 81   | 67   | 1.20     | 0.316032 | 45  | 64  | 48   | 35   | 39   | 53   | 47    | 52   | 44   | 1.17 | 0.246302 | 41       | 1.28     | 0.181373 |          |          |
| 248198_21 | A1f5g4200 | unknown protein contains similarity to W WD-40 repeat family protein                 | 237  | 337  | 345  | 358 | 405  | 306 | 307  | 356  | 0.86     | 0.333228 | 187 | 166 | 202  | 214  | 193  | 205  | 187   | 194  | 187  | 205  | 0.94     | 0.413845 | 191      | 0.97     | 0.733423 |          |
| 248199_21 | A1f5g4170 | membrane related protein-like ; support expressed protein                            | 264  | 298  | 264  | 346 | 293  | 244 | 316  | 0.68 | 0.044264 | 258      | 246 | 265 | 333  | 375  | 310  | 348  | 320   | 333  | 375  | 0.10 | 0.002259 | 338      | 0.10     | 0.019417 |          |          |
| 248200_21 | A1f5g4180 | O-methyltransferase ; supported by full WD-40 repeat family protein i / flavo        | 157  | 358  | 273  | 396 | 357  | 311 | 276  | 355  | 0.78     | 0.210591 | 329 | 337 | 360  | 676  | 455  | 449  | 392   | 408  | 342  | 476  | 0.72     | 0.099577 | 527      | 0.65     | 0.070145 |          |
| 248201_21 | A1f5g4180 | putative protein similar to unknown dro: mitochondrial transcription termination fa  | 45   | 64   | 73   | 82  | 77   | 72  | 61   | 77   | 0.77     | 0.129530 | 58  | 73  | 65   | 89   | 65   | 62   | 67    | 79   | 75   | 66   | 0.74     | 0.088    | 0.254631 | 73       | 0.90     | 0.484980 |
| 248202_21 | A1f5g4220 | unknown protein                                                                      | 47   | 59   | 63   | 64  | 59   | 59  | 56   | 61   | 0.93     | 0.445258 | 56  | 52  | 61   | 58   | 45   | 54   | 59    | 60   | 56   | 55   | 1.02     | 0.098777 | 52       | 1.08     | 0.424768 |          |
| 248203_21 | A1f5g4230 | Myb-related transcription factor-like oro myb family transcription factor (MYB49)    | 12   | 17   | 22   | 21  | 18   | 20  | 21   | 18   | 0.20     | 0.715018 | 14  | 20  | 17   | 12   | 17   | 12   | 10    | 16   | 17   | 12   | 0.99     | 0.569022 | 14       | 1.23     | 0.218755 |          |
| 248204_21 | A1f5g4280 | myosin heavy chain ; myosin heavy chain, putative                                    | 113  | 151  | 143  | 139 | 143  | 119 | 135  | 134  | 1.01     | 0.906648 | 104 | 92  | 116  | 131  | 121  | 98   | 135</ |      |      |      |          |          |          |          |          |          |

|           |           |                                                                                         |      |      |      |      |      |      |      |      |          |          |      |      |      |      |      |      |      |      |       |       |          |          |      |          |          |
|-----------|-----------|-----------------------------------------------------------------------------------------|------|------|------|------|------|------|------|------|----------|----------|------|------|------|------|------|------|------|------|-------|-------|----------|----------|------|----------|----------|
| 248135_at | A15f54890 | putative protein similar to unknown prot expressed protein                              | 117  | 187  | 174  | 184  | 186  | 165  | 159  | 179  | 0.89     | 0.439072 | 149  | 190  | 163  | 273  | 163  | 165  | 194  | 179  | 167   | 195   | 0.86     | 0.371807 | 200  | 0.83     | 0.438646 |
| 248136_at | A15f54910 | RNA helicase-like protein DEAD/DEAF box helicase, putative                              | 170  | 190  | 180  | 244  | 236  | 211  | 180  | 230  | 0.78     | 0.011380 | 110  | 141  | 147  | 189  | 151  | 114  | 166  | 168  | 133   | 157   | 0.84     | 0.238756 | 151  | 0.88     | 0.409813 |
| 248137_at | A15f54950 | putative protein contains similarity to cy anodonic hydratase-related / citrate hvd     | 36   | 50   | 52   | 46   | 61   | 47   | 46   | 51   | 0.89     | 0.459356 | 31   | 28   | 42   | 31   | 37   | 29   | 25   | 38   | 34    | 32    | 1.06     | 0.705701 | 32   | 1.05     | 0.705550 |
| 248138_at | A15f54960 | putative protein contains similarity to cy anodonic hydratase-related, putative         | 116  | 140  | 209  | 166  | 230  | 193  | 193  | 0.83 | 0.346348 | 203      | 170  | 171  | 168  | 171  | 154  | 172  | 164  | 184  | 172   | 0.94  | 0.777503 | 168      | 1.12 | 0.922953 |          |
| 248139_at | A15f54970 | putative protein similar to unknown prot expressed protein                              | 189  | 183  | 150  | 267  | 259  | 225  | 174  | 251  | 0.70     | 0.012260 | 219  | 197  | 243  | 323  | 275  | 235  | 238  | 250  | 219   | 264   | 0.83     | 0.109195 | 278  | 0.79     | 0.109678 |
| 248140_at | A15f54980 | putative protein similar to unknown prot integrated membrane family protein             | 212  | 232  | 266  | 311  | 300  | 239  | 236  | 284  | 0.83     | 0.159623 | 208  | 194  | 212  | 347  | 269  | 290  | 298  | 279  | 205   | 296   | 0.69     | 0.020449 | 302  | 0.68     | 0.015061 |
| 248141_at | A15f55010 | unknown protein                                                                         | 7    | 8    | 10   | 9    | 13   | 9    | 8    | 10   | 0.80     | 0.220058 | 10   | 8    | 9    | 13   | 10   | 9    | 9    | 10   | 9     | 10    | 0.90     | 0.411811 | 10   | 0.87     | 0.425425 |
| 248142_at | A15f55030 | putative protein similar to unknown prot expressed protein                              | 339  | 415  | 382  | 409  | 456  | 409  | 384  | 482  | 0.81     | 0.151421 | 304  | 409  | 347  | 307  | 307  | 302  | 304  | 372  | 302   | 364   | 0.94     | 0.085982 | 364  | 0.91     | 0.207204 |
| 248143_at | A15f55040 | putative protein similar to unknown prot DNA-binding bromodomain-containing o           | 33   | 44   | 49   | 51   | 60   | 47   | 42   | 53   | 0.80     | 0.157842 | 25   | 23   | 33   | 24   | 25   | 25   | 31   | 24   | 27    | 26    | 1.05     | 0.643710 | 24   | 1.11     | 0.454512 |
| 248144_at | A15f54880 | glucose-6-phosphate/hosphatase transk glucose-6-phosphate/hosphatase translo            | 346  | 448  | 478  | 571  | 662  | 522  | 424  | 585  | 0.72     | 0.047346 | 328  | 321  | 338  | 467  | 371  | 347  | 367  | 347  | 329   | 380   | 0.87     | 0.140477 | 395  | 0.83     | 0.147166 |
| 248145_at | A15f54880 | unknown protein - supported by full-len DTW domain-containing protein                   | 505  | 713  | 82   | 86   | 95   | 72   | 70   | 84   | 0.83     | 0.246623 | 69   | 78   | 77   | 102  | 74   | 85   | 83   | 71   | 75    | 83    | 0.90     | 0.308227 | 87   | 0.86     | 0.221488 |
| 248146_at | A15f54940 | translation initiation factor-like protein eukaryotic translation initiation factor SU  | 1147 | 1147 | 1243 | 1206 | 1449 | 912  | 1132 | 1189 | 0.95     | 0.346348 | 997  | 1085 | 904  | 1323 | 1181 | 1062 | 1443 | 1364 | 965   | 1274  | 0.78     | 0.026801 | 1188 | 0.84     | 0.103189 |
| 248147_at | A15f54900 | putative protein contains similarity to pc RNA-internal protein 45 (RBP45), putain      | 970  | 1171 | 1071 | 1251 | 1418 | 1112 | 1053 | 1260 | 0.84     | 0.109344 | 1386 | 1159 | 1328 | 1632 | 1571 | 1314 | 1295 | 1282 | 1291  | 1419  | 0.91     | 0.298001 | 1505 | 0.86     | 0.145555 |
| 248148_at | A15f54930 | putative protein similar to unknown prot A hook motif-containing protein                | 232  | 264  | 305  | 273  | 301  | 250  | 267  | 275  | 0.97     | 0.783581 | 307  | 359  | 330  | 457  | 360  | 326  | 359  | 351  | 332   | 371   | 0.90     | 0.268395 | 381  | 0.87     | 0.306221 |
| 248149_at | A15f54855 | Expressed protein ; supported by full-len polon Ole e 1 allergen and extensin fam       | 490  | 671  | 700  | 807  | 852  | 714  | 620  | 791  | 0.78     | 0.091456 | 702  | 734  | 778  | 1004 | 835  | 841  | 807  | 751  | 738   | 866   | 0.85     | 0.165765 | 923  | 0.80     | 0.103731 |
| 248115_at | A15f54870 | putative protein strong similarity to unknown prot                                      | 304  | 356  | 358  | 390  | 442  | 296  | 339  | 376  | 0.90     | 0.471002 | 303  | 284  | 305  | 447  | 394  | 348  | 368  | 371  | 297   | 386   | 0.77     | 0.003579 | 397  | 0.75     | 0.026496 |
| 248116_at | A15f55020 | putative protein contains similarity to M rmb family transcription factor (MYB120       | 24   | 22   | 31   | 27   | 39   | 25   | 26   | 30   | 0.85     | 0.400478 | 32   | 26   | 39   | 49   | 39   | 49   | 42   | 33   | 29    | 40    | 0.72     | 0.019516 | 42   | 0.69     | 0.021540 |
| 248117_at | A15f55000 | FH protein interacto protein FIP2 (tbl potassium channel tetramerisation doms           | 249  | 352  | 366  | 363  | 395  | 346  | 332  | 368  | 0.90     | 0.483054 | 315  | 387  | 374  | 502  | 388  | 367  | 416  | 390  | 258   | 413   | 0.87     | 0.177391 | 419  | 0.86     | 0.271576 |
| 248118_at | A15f55050 | GD5L-motif lipase/hydrolase-like protei GD5L-motif lipase/hydrolase family prot         | 27   | 36   | 42   | 52   | 37   | 36   | 35   | 41   | 0.86     | 0.435590 | 78   | 72   | 75   | 51   | 39   | 42   | 50   | 45   | 75    | 46    | 1.64     | 0.000138 | 44   | 1.69     | 0.001737 |
| 248087_at | A15f55060 | unknown protein                                                                         | 131  | 172  | 158  | 148  | 160  | 139  | 154  | 149  | 0.13     | 0.744664 | 147  | 125  | 159  | 165  | 142  | 134  | 155  | 156  | 144   | 150   | 0.96     | 0.540547 | 147  | 0.98     | 0.812505 |
| 248088_at | A15f55070 | 2-oxoacidate dehydrogenase E2 sub, 2-oxoacid dehydrogenase family protein               | 394  | 476  | 474  | 495  | 593  | 433  | 448  | 507  | 0.88     | 0.325227 | 438  | 373  | 423  | 538  | 492  | 431  | 407  | 411  | 411   | 462   | 0.89     | 0.193931 | 491  | 0.84     | 0.008027 |
| 248089_at | A15f55080 | salt stress inducible small GTP-binding protein Ras-related GTP-binding protein, outatu | 14   | 20   | 29   | 23   | 26   | 23   | 21   | 24   | 0.87     | 0.509213 | 17   | 14   | 16   | 18   | 16   | 20   | 22   | 22   | 16    | 20    | 0.80     | 0.036313 | 18   | 0.86     | 0.125839 |
| 248090_at | A15f55090 | putative protein contains similarity to NI protein kinase family protein                | 13   | 15   | 15   | 15   | 16   | 13   | 14   | 15   | 0.96     | 0.575609 | 10   | 14   | 15   | 14   | 12   | 12   | 14   | 18   | 13    | 14    | 0.94     | 0.639184 | 13   | 1.02     | 0.908244 |
| 248091_at | A15f55120 | putative protein strong similarity to unk expressed protein                             | 283  | 415  | 428  | 415  | 455  | 350  | 375  | 407  | 0.92     | 0.602710 | 272  | 261  | 260  | 425  | 347  | 321  | 491  | 461  | 264   | 409   | 0.65     | 0.016712 | 364  | 0.73     | 0.034427 |
| 248092_at | A15f55170 | ubiquitin-like protein small ubiquitin-like modifier 3 (SUMO)                           | 46   | 48   | 74   | 60   | 51   | 54   | 56   | 55   | 1.02     | 0.908437 | 46   | 38   | 56   | 48   | 40   | 36   | 45   | 43   | 47    | 42    | 1.11     | 0.367437 | 41   | 1.14     | 0.422791 |
| 248093_at | A15f55210 | putative protein similar to unknown prot expressed protein                              | 600  | 786  | 823  | 891  | 1036 | 855  | 739  | 927  | 0.80     | 0.104989 | 690  | 991  | 888  | 1305 | 953  | 963  | 886  | 856  | 998   | 986   | 0.86     | 0.293434 | 1073 | 0.80     | 0.209550 |
| 248094_at | A15f55220 | trigger factor-like protein triquer factor type chaperone family prot                   | 68   | 109  | 76   | 110  | 108  | 82   | 84   | 100  | 0.84     | 0.365971 | 66   | 76   | 78   | 93   | 76   | 79   | 87   | 81   | 74    | 83    | 0.88     | 0.094760 | 83   | 0.89     | 0.224994 |
| 248095_at | A15f55230 | putative protein strong similarity to unk microtubule associated protein (MAPB5/        | 942  | 1045 | 1028 | 1130 | 1263 | 986  | 1005 | 1127 | 0.89     | 0.230190 | 843  | 684  | 806  | 1061 | 935  | 746  | 984  | 913  | 778   | 928   | 0.84     | 0.102064 | 914  | 0.85     | 0.258270 |
| 248096_at | A15f55240 | embryo-specific protein c1, Ca2+-binding-calcium-related family protein / embrio-       | 108  | 97   | 88   | 203  | 76   | 81   | 67   | 120  | 0.56     | 0.295392 | 28   | 38   | 41   | 35   | 37   | 47   | 39   | 36   | 38    | 95    | 0.84     | 0.684425 | 34   | 1.05     | 0.707661 |
| 248097_at | A15f55250 | putative protein contains similarity to cblA serine/threonine protein cholestasase P1   | 162  | 207  | 222  | 250  | 259  | 192  | 202  | 225  | 0.83     | 0.032381 | 187  | 172  | 193  | 226  | 195  | 191  | 196  | 195  | 185   | 202   | 0.95     | 0.327926 | 202  | 0.95     | 0.310010 |
| 248098_at | A15f55260 | unknown protein ; supported by cDNA: AATP synthase subunit H family protein             | 554  | 743  | 678  | 837  | 773  | 722  | 658  | 811  | 0.81     | 0.100339 | 698  | 758  | 742  | 1113 | 826  | 789  | 871  | 801  | 733   | 880   | 0.83     | 0.118509 | 909  | 0.81     | 0.164581 |
| 248099_at | A15f55300 | DNA topoisomerase I (sp P30181) DNA topoisomerase I                                     | 384  | 498  | 491  | 531  | 601  | 432  | 458  | 521  | 0.88     | 0.361572 | 371  | 336  | 386  | 492  | 448  | 350  | 442  | 415  | 364   | 430   | 0.85     | 0.096971 | 430  | 0.85     | 0.215456 |
| 248100_at | A15f55180 | beta-1,3-glucanase-like protein -sucos glycosyl hydrolase family 17 protein             | 670  | 978  | 884  | 907  | 967  | 832  | 844  | 909  | 0.93     | 0.541108 | 1418 | 1314 | 1629 | 1527 | 1418 | 1199 | 1202 | 1205 | 1462  | 1310  | 1.12     | 0.219091 | 1381 | 1.06     | 0.565094 |
| 248101_at | A15f55200 | chaperone GroE-like protein -sucos co-chaperone gpE protein, putative                   | 82   | 78   | 105  | 123  | 119  | 101  | 88   | 114  | 0.78     | 0.036314 | 94   | 85   | 113  | 116  | 103  | 91   | 107  | 98   | 97    | 107   | 0.91     | 0.429871 | 110  | 0.88     | 0.454541 |
| 248102_at | A15f55140 | putative protein contains similarity to S-ribosomal protein L30 family protein          | 207  | 307  | 309  | 316  | 347  | 268  | 274  | 310  | 0.88     | 0.427888 | 319  | 333  | 320  | 417  | 335  | 337  | 324  | 315  | 324   | 346   | 0.94     | 0.414056 | 363  | 0.89     | 0.227474 |
| 248103_at | A15f55160 | ubiquitin-like protein SMT3-like -sucos small ubiquitin-like modifier 2 (SUMO)          | 1533 | 1833 | 2200 | 2170 | 2341 | 1920 | 1856 | 2144 | 0.87     | 0.275852 | 1737 | 1710 | 2014 | 2474 | 2103 | 1950 | 2260 | 2310 | 12422 | 12220 | 0.82     | 0.028237 | 2176 | 0.84     | 0.124229 |
| 248104_at | A15f55250 | S-adenosyl-L-methionine-salicylic acid -S-adenosyl-L-methionine carboxyl meth           | 57   | 73   | 95   | 133  | 102  | 113  | 75   | 116  | 0.65     | 0.044825 | 111  | 106  | 144  | 228  | 145  | 152  | 159  | 145  | 120   | 166   | 0.73     | 0.091503 | 175  | 0.69     | 0.132194 |
| 248105_at | A15f55280 | putative protein Flax chloroplast ho cell division protein Flax2, chloroplast, su       | 269  | 269  | 268  | 343  | 355  | 288  | 275  | 304  | 0.84     | 0.067469 | 259  | 241  | 273  | 355  | 308  | 325  | 258  | 313  | 302   | 315   | 0.82     | 0.028601 | 310  | 0.82     | 0.106884 |
| 248106_at | A15f55100 | putative protein similar to unknown prot SWAP (Suppressor-of-White-A-Pricot)/su         | 204  | 306  | 331  | 286  | 309  | 242  | 280  | 279  | 1.00     | 0.984940 | 255  | 261  | 270  | 349  | 281  | 241  | 267  | 265  | 262   | 281   | 0.93     | 0.480300 | 290  | 0.90     | 0.428888 |
| 248107_at | A15f55190 | small Ras-like GTP-binding protein (tbl Ras-related GTP-binding protein (RAN3)          | 1354 | 1502 | 1556 | 1770 | 1892 | 1581 | 1471 | 1748 | 0.84     | 0.063594 | 1487 | 1497 | 1639 | 2048 | 1654 | 1514 | 1675 | 1711 | 1541  | 1720  | 0.90     | 0.196450 | 1739 | 0.89     | 0.302966 |
| 248108_at | A15f55130 | molibdodinitr synthase sulohurvasc (c molibdodinitr cofactor synthase protein :         | 325  | 412  | 449  | 474  | 563  | 420  | 395  | 486  | 0.81     | 0.179470 | 378  | 382  | 422  | 557  | 500  | 425  | 454  | 453  | 393   | 478   | 0.82     | 0.041426 | 494  | 0.80     | 0.008557 |
| 248109_at | A15f55310 | DNA topoisomerase I DNA topoisomerase I, putative                                       | 304  | 433  | 450  | 463  | 507  | 419  | 396  | 463  | 0.85     | 0.270797 | 338  | 282  | 343  | 471  | 327  | 322  | 364  | 336  | 321   | 374   | 0.86     | 0.208970 | 390  | 0.82     | 0.220570 |
| 248110_at | A15f55320 | was synthase-like protein membrane bound O-acyl transferase (M                          | 35   | 50   | 56   | 57   | 48   | 57   | 48   | 57   | 0.87     | 0.369024 | 42   | 41   | 46   | 35   | 43   | 36   | 43   | 36   | 43    | 36    | 1.20     | 0.089503 | 34   | 1.29     | 0.042455 |
| 248111_at | A15f55330 | was synthase-like protein membrane bound O-acyl transferase (M                          | 61   | 70   | 90   | 115  | 99   | 99   | 74   | 105  | 0.70     | 0.039471 | 107  | 92   | 120  | 171  | 127  | 138  | 151  | 156  | 106   | 149   | 0.72     | 0.011702 | 145  | 0.73     | 0.068188 |
| 248112_at | A15f55350 | was synthase-like protein membrane bound O-acyl transferase (M                          | 43   | 59   | 59   | 62   | 77   | 61   | 54   | 67   | 0.80     | 0.149776 | 39   | 33   | 41   | 43   | 32   | 36   | 50   | 42   | 38    | 41    | 0.93     | 0.528744 | 37   | 1.02     | 0.874983 |
| 248113_at | A15f55360 | was synthase-like protein lono-chain-alcohol O-fatty-acyltransferase                    | 48   | 58   | 75   | 70   | 70   | 71   | 60   | 70   | 0.85     | 0.253874 | 46   | 53   | 56   | 57   | 50   | 52   | 66   | 58   | 52    | 57    | 0.91     | 0.299836 | 53   | 0.98     | 0.750427 |
| 248114_at | A15f55370 | was synthase-like protein lono-chain-alcohol O-fatty-acyltransferase                    | 52   | 67   | 63   | 62   | 63   | 62   | 59   | 62   | 0.89     | 0.444607 | 50   | 52   | 53   | 34   | 34   |      |      |      |       |       |          |          |      |          |          |

|             |           |                                                                                        |      |      |      |      |      |      |      |      |          |          |      |      |      |      |      |      |      |      |      |          |          |          |          |          |          |
|-------------|-----------|----------------------------------------------------------------------------------------|------|------|------|------|------|------|------|------|----------|----------|------|------|------|------|------|------|------|------|------|----------|----------|----------|----------|----------|----------|
| 248040_at   | A15f55970 | putative protein contains similarity to ur zinc finger (C3HC4-type RING finger) fa     | 34   | 53   | 76   | 48   | 50   | 48   | 54   | 49   | 1.11     | 0.674537 | 28   | 32   | 35   | 39   | 30   | 30   | 38   | 39   | 31   | 35       | 0.89     | 0.267624 | 33       | 0.95     | 0.682299 |
| 248041_at   | A15f55940 | unknown protein ,supported by full-length expressed protein                            | 324  | 391  | 410  | 421  | 483  | 391  | 375  | 431  | 0.87     | 0.208992 | 496  | 599  | 507  | 735  | 607  | 531  | 542  | 528  | 534  | 589      | 0.91     | 0.378603 | 624      | 0.86     | 0.254610 |
| 248042_at   | A15f55960 | putative protein similar to unknown drol expressed protein                             | 110  | 128  | 150  | 156  | 183  | 152  | 129  | 164  | 0.77     | 0.085960 | 124  | 124  | 143  | 161  | 132  | 120  | 149  | 143  | 130  | 141      | 0.92     | 0.351532 | 138      | 0.95     | 0.623063 |
| 248043_s_at | A15f55980 | putative protein (emb)CA8740.1) beta-galactosidase, putative / lacidase, p             | 2863 | 2919 | 3709 | 4337 | 2473 | 3602 | 2913 | 3602 | 0.79     | 0.132400 | 2473 | 2008 | 2618 | 2384 | 2274 | 2327 | 2617 | 2618 | 2384 | 2274     | 0.91     | 0.220024 | 2811     | 0.86     | 0.272624 |
| 248044_at   | A15f56020 | putative protein similar to unknown drol expressed protein                             | 148  | 195  | 201  | 202  | 220  | 187  | 181  | 203  | 0.89     | 0.329906 | 189  | 202  | 210  | 279  | 208  | 198  | 195  | 195  | 201  | 215      | 0.93     | 0.539007 | 228      | 0.88     | 0.355050 |
| 248045_at   | A15f56030 | HEAT SHOCK PROTEIN 81-2 (HSP81 heat shock protein 81-4 (HSP81-4) /// h                 | 2186 | 2356 | 1967 | 2755 | 3251 | 2433 | 2170 | 2813 | 0.77     | 0.071034 | 1639 | 1475 | 1869 | 2243 | 1846 | 1494 | 2063 | 2111 | 1661 | 1951     | 0.85     | 0.183840 | 1861     | 0.89     | 0.459113 |
| 248046_at   | A15f56040 | receptor protein kinase-like protein leucine-rich repeat protein kinase, putat         | 483  | 651  | 796  | 771  | 841  | 585  | 664  | 732  | 0.91     | 0.550931 | 774  | 772  | 735  | 1012 | 789  | 731  | 931  | 876  | 888  | 0.88     | 0.160292 | 844      | 0.90     | 0.387987 |          |
| 248047_at   | A15f56050 | putative protein similar to unknown drol hypothetical protein                          | 24   | 32   | 36   | 33   | 37   | 31   | 36   | 42   | 0.79     | 0.071034 | 36   | 42   | 37   | 41   | 42   | 39   | 33   | 31   | 41   | 42       | 0.93     | 0.132401 | 36       | 0.93     | 0.472248 |
| 248048_at   | A15f56080 | nicotianamine synthase nicotianamine synthase, putative                                | 34   | 38   | 51   | 48   | 54   | 54   | 41   | 52   | 0.79     | 0.120957 | 28   | 32   | 41   | 30   | 25   | 32   | 29   | 33   | 34   | 30       | 1.15     | 0.248247 | 29       | 1.17     | 0.324483 |
| 248049_at   | A15f56090 | putative protein contains similarity to cv cytochrome oxidase assemblv famly c         | 132  | 155  | 149  | 181  | 189  | 140  | 145  | 170  | 0.85     | 0.212492 | 124  | 107  | 136  | 186  | 148  | 148  | 157  | 151  | 122  | 158      | 0.77     | 0.202873 | 161      | 0.76     | 0.069642 |
| 248050_at   | A15f56100 | unknown protein glycine-rich protein / oleosin                                         | 104  | 141  | 233  | 189  | 143  | 125  | 160  | 152  | 1.05     | 0.871696 | 116  | 138  | 125  | 122  | 101  | 120  | 146  | 142  | 126  | 126      | 1.00     | 0.975026 | 114      | 1.11     | 0.264967 |
| 248051_at   | A15f56110 | Atmyb103 (gb)AA040692.1) myb family transcription factor                               | 46   | 59   | 70   | 62   | 67   | 64   | 58   | 64   | 0.91     | 0.444203 | 52   | 42   | 61   | 51   | 46   | 51   | 52   | 55   | 52   | 51       | 1.02     | 0.836142 | 49       | 1.06     | 0.653827 |
| 247983_at   | A15f56130 | putative protein similar to unknown drol transducin family protein / WD-40 repeat      | 243  | 301  | 275  | 390  | 329  | 289  | 365  | 0.79 | 0.056502 | 322      | 335  | 360  | 592  | 379  | 396  | 336  | 326  | 339  | 400  | 0.85     | 0.322939 | 339      | 0.86     | 0.146256 |          |
| 247994_at   | A15f56140 | RNA-binding protein-like KH domain-containing protein                                  | 104  | 138  | 174  | 175  | 169  | 135  | 139  | 160  | 0.87     | 0.430448 | 156  | 214  | 160  | 238  | 180  | 194  | 197  | 192  | 177  | 200      | 0.88     | 0.268511 | 204      | 0.87     | 0.354414 |
| 247995_at   | A15f56160 | putative protein contains similarity to pr SEC14 cytosolic factor family protein / p   | 72   | 87   | 95   | 73   | 76   | 71   | 84   | 73   | 1.15     | 0.175032 | 50   | 48   | 56   | 58   | 44   | 40   | 51   | 43   | 51   | 47       | 1.08     | 0.461607 | 47       | 1.08     | 0.584285 |
| 247996_at   | A15f56170 | putative protein contains similarity to Gt expressed protein                           | 785  | 661  | 715  | 913  | 970  | 771  | 720  | 885  | 0.81     | 0.076197 | 802  | 887  | 901  | 1257 | 1005 | 909  | 943  | 932  | 863  | 1009     | 0.86     | 0.149653 | 1057     | 0.82     | 0.146137 |
| 247997_at   | A15f56180 | putative protein contains similarity to ac actin-related protein, putative (ARP8)      | 137  | 214  | 252  | 172  | 215  | 153  | 201  | 180  | 1.12     | 0.617169 | 161  | 187  | 181  | 239  | 205  | 193  | 218  | 206  | 153  | 213      | 0.86     | 0.030863 | 213      | 0.86     | 0.101676 |
| 247998_at   | A15f56200 | unknown protein zinc finger (C2H2 type) family protein                                 | 25   | 34   | 28   | 23   | 25   | 23   | 29   | 24   | 1.23     | 0.126037 | 23   | 19   | 20   | 17   | 18   | 19   | 19   | 19   | 21   | 18       | 1.13     | 0.040300 | 18       | 1.16     | 0.050597 |
| 247999_at   | A15f56150 | E2, ubiquitin-conjugating enzyme, puts ubiquitin-conjugating enzyme, putative          | 244  | 291  | 307  | 275  | 278  | 213  | 281  | 255  | 1.10     | 0.419092 | 322  | 335  | 334  | 323  | 297  | 261  | 255  | 260  | 330  | 273      | 1.18     | 0.029120 | 294      | 1.13     | 0.177435 |
| 248000_at   | A15f56190 | WD-repeat protein-like, supported by h WD-40 repeat family protein                     | 172  | 232  | 206  | 229  | 272  | 191  | 203  | 231  | 0.88     | 0.403267 | 171  | 163  | 184  | 249  | 214  | 182  | 228  | 207  | 173  | 216      | 0.80     | 0.030774 | 214      | 0.80     | 0.105025 |
| 248001_at   | A15f56990 | calneurin B-like protein 2 (cb)AAC265 calneurin B-like protein 2 (CB1.2)               | 199  | 246  | 263  | 274  | 330  | 228  | 236  | 277  | 0.85     | 0.300666 | 293  | 256  | 31   | 309  | 309  | 314  | 306  | 265  | 320  | 0.83     | 0.019951 | 326      | 0.81     | 0.053236 |          |
| 248002_at   | A15f56185 | Expressed protein , supported by full-le actin-related protein, putative (ARP8)        | 59   | 72   | 89   | 91   | 101  | 75   | 73   | 89   | 0.82     | 0.247650 | 46   | 61   | 53   | 78   | 58   | 60   | 65   | 66   | 53   | 65       | 0.81     | 0.055652 | 65       | 0.81     | 0.180125 |
| 248003_at   | A15f56220 | putative protein contains similarity to ur putative protein contains similarity to uni | 176  | 242  | 239  | 367  | 390  | 323  | 219  | 360  | 0.61     | 0.008547 | 256  | 221  | 283  | 374  | 348  | 270  | 322  | 334  | 253  | 330      | 0.77     | 0.028110 | 331      | 0.77     | 0.098329 |
| 248004_at   | A15f56230 | putative protein similar to unknown drol overnated rab acceptor (PRA1) family o        | 34   | 37   | 45   | 38   | 49   | 40   | 39   | 42   | 0.91     | 0.476227 | 21   | 25   | 32   | 25   | 26   | 24   | 26   | 27   | 26   | 26       | 1.00     | 0.973932 | 25       | 1.02     | 0.863673 |
| 248005_at   | A15f56240 | unknown protein expressed protein                                                      | 162  | 193  | 194  | 209  | 219  | 159  | 183  | 195  | 0.94     | 0.596174 | 153  | 126  | 153  | 170  | 166  | 130  | 181  | 168  | 144  | 163      | 0.88     | 0.199647 | 156      | 0.93     | 0.449730 |
| 248006_at   | A15f56250 | unknown protein expressed protein                                                      | 86   | 100  | 104  | 115  | 98   | 92   | 106  | 86   | 0.98     | 0.090159 | 75   | 70   | 81   | 102  | 91   | 80   | 107  | 88   | 76   | 94       | 0.81     | 0.043089 | 91       | 0.83     | 0.099667 |
| 248007_at   | A15f56260 | S-adenosylmethionine:2-demethylmen dimethylmenaquinone methyltransferase               | 104  | 143  | 142  | 165  | 172  | 131  | 130  | 156  | 0.83     | 0.210176 | 124  | 136  | 128  | 233  | 186  | 176  | 193  | 174  | 129  | 193      | 0.67     | 0.040608 | 198      | 0.65     | 0.017679 |
| 248008_at   | A15f56270 | transcription factor NWRKY4-like , supported by full-length expressed protein          | 44   | 54   | 68   | 41   | 49   | 33   | 56   | 41   | 1.35     | 0.164947 | 42   | 44   | 40   | 39   | 31   | 30   | 42   | 37   | 42   | 36       | 1.18     | 0.090897 | 33       | 1.26     | 0.048206 |
| 248009_at   | A15f56280 | putative protein-like: similar to CH6 COP9 signalosome subunit 6 / CSN sub             | 322  | 465  | 414  | 494  | 528  | 413  | 367  | 478  | 0.77     | 0.026386 | 418  | 524  | 501  | 753  | 557  | 495  | 493  | 480  | 481  | 556      | 0.87     | 0.342153 | 602      | 0.80     | 0.225523 |
| 248010_at   | A15f56290 | peroxisomal translocase signal type 1 nco peroxisomal translocase signal type 1        | 330  | 469  | 468  | 513  | 468  | 513  | 468  | 513  | 0.88     | 0.241457 | 368  | 451  | 442  | 402  | 402  | 402  | 416  | 402  | 416  | 402      | 0.88     | 0.173295 | 415      | 0.88     | 0.317145 |
| 248011_at   | A15f56300 | S-adenosyl-L-methionine:salicylic acid S-adenosyl-L-methionine:carboxyl meth           | 370  | 428  | 390  | 334  | 402  | 288  | 396  | 341  | 1.16     | 0.220841 | 193  | 173  | 185  | 378  | 251  | 281  | 262  | 237  | 184  | 271      | 0.68     | 0.058653 | 265      | 0.65     | 0.102472 |
| 248012_at   | A15f56310 | putative protein strong similarity to unk putative protein contains similarity to      | 12   | 15   | 13   | 17   | 21   | 16   | 13   | 18   | 0.75     | 0.070763 | 11   | 13   | 17   | 16   | 15   | 13   | 13   | 13   | 11   | 14       | 1.01     | 0.967887 | 15       | 0.94     | 0.711936 |
| 248013_at   | A15f56330 | putative protein contains similarity to ca carbonic anhydrase family protein           | 50   | 57   | 67   | 52   | 74   | 50   | 58   | 59   | 0.99     | 0.943727 | 67   | 72   | 74   | 51   | 46   | 52   | 65   | 55   | 71   | 64       | 1.33     | 0.074719 | 50       | 1.44     | 0.007487 |
| 248014_at   | A15f56340 | putative protein similar to unknown drol zinc finger (C3HC4-type RING finger) fa       | 221  | 234  | 284  | 319  | 316  | 242  | 247  | 292  | 0.84     | 0.237171 | 238  | 221  | 266  | 324  | 232  | 250  | 242  | 263  | 0.92 | 0.451636 | 274      | 0.88     | 0.307986 |          |          |
| 248015_at   | A15f56370 | putative protein similar to unknown drol F-box family protein                          | 26   | 24   | 28   | 24   | 30   | 26   | 28   | 0.94 | 0.512645 | 23       | 26   | 26   | 23   | 18   | 20   | 28   | 23   | 25   | 22   | 1.13     | 0.293468 | 20       | 1.25     | 0.048386 |          |
| 248016_at   | A15f56380 | putative protein similar to unknown drol F-box family protein                          | 24   | 23   | 28   | 23   | 24   | 29   | 25   | 25   | 0.98     | 0.837076 | 22   | 18   | 25   | 18   | 25   | 18   | 22   | 34   | 18   | 22       | 0.99     | 0.978384 | 19       | 1.15     | 0.307969 |
| 248017_at   | A15f56460 | protein kinase-like protein protein kinase, putative                                   | 57   | 62   | 69   | 65   | 56   | 56   | 63   | 0.89 | 0.242796 | 51       | 50   | 67   | 52   | 45   | 51   | 58   | 55   | 56   | 53   | 107      | 0.173154 | 50       | 1.13     | 0.353129 |          |
| 248018_at   | A15f56470 | putative protein similar to unknown drol FAD-dependent oxidoreductase family p         | 25   | 26   | 44   | 44   | 44   | 44   | 44   | 44   | 0.74     | 0.118659 | 28   | 25   | 31   | 22   | 26   | 31   | 27   | 19   | 28   | 26       | 1.08     | 0.271192 | 24       | 1.08     | 0.156876 |
| 248019_at   | A15f56480 | putative protein similar to unknown drol proteinase inhibitor/slow storage/acid tran   | 47   | 67   | 70   | 50   | 53   | 48   | 61   | 50   | 1.22     | 0.206709 | 97   | 122  | 114  | 39   | 33   | 40   | 38   | 39   | 111  | 38       | 2.93     | 0.000155 | 38       | 2.95     | 0.000741 |
| 248020_at   | A15f56490 | putative protein strong similarity to ur FAD-binding domain-containing protein         | 73   | 91   | 82   | 75   | 55   | 52   | 82   | 60   | 1.37     | 0.050920 | 65   | 69   | 82   | 80   | 60   | 49   | 58   | 57   | 72   | 61       | 1.18     | 0.268604 | 63       | 1.14     | 0.440394 |
| 248021_at   | A15f56500 | RuBisCO subunit DnaK-domain protein beta chaperonin, putative                          | 362  | 408  | 384  | 530  | 555  | 405  | 385  | 497  | 0.77     | 0.080230 | 330  | 250  | 359  | 489  | 427  | 358  | 368  | 387  | 313  | 406      | 0.77     | 0.059089 | 425      | 0.74     | 0.089663 |
| 248022_at   | A15f56510 | putative protein contains similarity to Ru pumilio/PuF RNA-binding domain-contain      | 428  | 343  | 515  | 360  | 378  | 336  | 429  | 358  | 1.20     | 0.240752 | 256  | 260  | 282  | 303  | 222  | 198  | 333  | 302  | 266  | 271      | 0.98     | 0.889413 | 240      | 1.11     | 0.479374 |
| 248023_at   | A15f56450 | ADP/ATP translocase-like protein ,sup mitochondrial substrate carrier family pr        | 330  | 322  | 340  | 329  | 365  | 318  | 327  | 387  | 0.88     | 0.321457 | 328  | 243  | 282  | 285  | 249  | 243  | 282  | 249  | 282  | 285      | 0.96     | 0.899912 | 240      | 0.95     | 0.046078 |
| 247989_at   | A15f56350 | pyruvate kinase ,supported by full-length expressed protein, putative                  | 545  | 469  | 547  | 851  | 863  | 737  | 520  | 817  | 0.64     | 0.003537 | 427  | 389  | 476  | 742  | 614  | 500  | 554  | 572  | 431  | 596      | 0.72     | 0.027490 | 619      | 0.70     | 0.064427 |
| 247990_at   | A15f56360 | unknown protein ,supported by full-length expressed protein                            | 492  | 595  | 627  | 674  | 715  | 608  | 571  | 666  | 0.86     | 0.140537 | 458  | 495  | 506  | 810  | 575  | 503  | 580  | 583  | 486  | 610      | 0.80     | 0.128332 | 629      | 0.77     | 0.201479 |
| 247991_at   | A15f56320 | exonin ,supported by full-length cDN expressed protein, putative (EXP14)               | 67   | 86   | 62   | 62   | 62   | 68   | 62   | 68   | 1.02     | 0.160421 | 61   | 79   | 78   | 81   | 46   | 58   | 81   | 77   | 73   | 69       | 1.06     | 0.708844 | 62       | 1.18     | 0.406696 |
| 247992_at   | A15f56520 | unknown protein expressed protein                                                      | 71   | 130  | 130  | 169  | 133  | 130  | 130  | 130  | 0.88     | 0.050248 | 148  | 138  | 148  | 201  | 149  | 157  | 158  | 143  | 139  | 161      | 0.85     | 0.133292 | 161      | 0.81     | 0.140620 |
| 247961_at   | A15f56570 |                                                                                        |      |      |      |      |      |      |      |      |          |          |      |      |      |      |      |      |      |      |      |          |          |          |          |          |          |

|           |           |                                                                                      |      |      |      |      |      |      |      |      |          |          |      |      |      |      |      |      |      |        |          |          |          |          |          |          |          |
|-----------|-----------|--------------------------------------------------------------------------------------|------|------|------|------|------|------|------|------|----------|----------|------|------|------|------|------|------|------|--------|----------|----------|----------|----------|----------|----------|----------|
| 247946_at | A15g57180 | putative protein similar to unknown pro expressed protein                            | 45   | 103  | 62   | 83   | 73   | 58   | 70   | 71   | 0.98     | 0.934448 | 55   | 59   | 53   | 72   | 58   | 56   | 60   | 63     | 56       | 62       | 0.91     | 0.188067 | 62       | 0.90     | 0.316615 |
| 247947_at | A15g57090 | auxin transport protein EIR1 ( abnAAC3; auxin transport protein (EIR1) )             | 71   | 94   | 103  | 100  | 105  | 92   | 89   | 99   | 0.90     | 0.391373 | 90   | 84   | 90   | 81   | 65   | 76   | 87   | 86     | 88       | 79       | 1.11     | 0.156055 | 74       | 1.19     | 0.049104 |
| 247948_at | A15g57130 | unknown protein stromu similarly to unk expressed protein                            | 193  | 184  | 228  | 447  | 493  | 363  | 246  | 435  | 0.57     | 0.022298 | 151  | 129  | 184  | 279  | 217  | 169  | 285  | 256    | 154      | 241      | 0.64     | 0.032036 | 222      | 0.70     | 0.133734 |
| 247949_at | A15g57430 | cytochrome P450                                                                      | 19   | 24   | 30   | 24   | 30   | 24   | 27   | 30   | 0.90     | 0.045405 | 15   | 19   | 21   | 19   | 19   | 15   | 19   | 17     | 24       | 19       | 1.01     | 0.382193 | 19       | 1.01     | 0.860746 |
| 247950_at | A15g57230 | unknown protein                                                                      | 156  | 318  | 188  | 211  | 257  | 202  | 180  | 223  | 0.80     | 0.116886 | 199  | 212  | 204  | 267  | 227  | 224  | 211  | 197    | 205      | 225      | 0.91     | 0.254373 | 239      | 0.86     | 0.077128 |
| 247951_at | A15g57240 | oxysterol-binding protein-like                                                       | 114  | 188  | 188  | 173  | 226  | 143  | 163  | 181  | 0.90     | 0.624067 | 60   | 60   | 64   | 135  | 118  | 106  | 125  | 112    | 61       | 119      | 0.51     | 0.000158 | 120      | 0.51     | 0.002579 |
| 247952_at | A15g57250 | salt-inducible protein-like                                                          | 118  | 126  | 132  | 136  | 153  | 108  | 114  | 132  | 0.86     | 0.380911 | 78   | 77   | 99   | 113  | 86   | 81   | 101  | 98     | 84       | 96       | 0.88     | 0.285786 | 93       | 0.91     | 0.510169 |
| 247953_at | A15g57260 | cytochrome P450                                                                      | 34   | 38   | 42   | 38   | 46   | 49   | 32   | 43   | 0.79     | 0.184066 | 27   | 37   | 34   | 35   | 33   | 27   | 27   | 27     | 29       | 31       | 0.94     | 0.547115 | 34       | 0.92     | 0.100877 |
| 247926_at | A15g57280 | protein carboxyl methylase-like                                                      | 216  | 262  | 285  | 319  | 333  | 284  | 255  | 314  | 0.82     | 0.084784 | 288  | 322  | 316  | 450  | 350  | 335  | 309  | 292    | 308      | 347      | 0.89     | 0.340099 | 378      | 0.81     | 0.134824 |
| 247927_at | A15g57310 | unknown protein                                                                      | 20   | 30   | 40   | 32   | 33   | 33   | 30   | 33   | 0.92     | 0.660381 | 22   | 26   | 27   | 33   | 29   | 30   | 28   | 30     | 25       | 30       | 0.84     | 0.022197 | 30       | 0.83     | 0.060544 |
| 247928_at | A15g57320 | villin                                                                               | 68   | 69   | 84   | 80   | 85   | 82   | 74   | 82   | 0.90     | 0.171121 | 56   | 61   | 69   | 55   | 65   | 50   | 67   | 63     | 62       | 60       | 1.03     | 0.756607 | 57       | 1.09     | 0.437228 |
| 247929_at | A15g57330 | apopory-associated protein C                                                         | 305  | 400  | 379  | 440  | 516  | 320  | 361  | 436  | 0.83     | 0.046968 | 347  | 382  | 365  | 551  | 455  | 409  | 430  | 414    | 365      | 452      | 0.81     | 0.046306 | 472      | 0.77     | 0.087122 |
| 247898_at | A15g57360 | F-box protein ZTL/FK1/ADO1, AIFB F-box family protein / LOV kelch protein            | 126  | 181  | 176  | 198  | 221  | 163  | 161  | 194  | 0.83     | 0.251603 | 113  | 107  | 120  | 157  | 122  | 108  | 136  | 127    | 113      | 130      | 0.87     | 0.178801 | 129      | 0.88     | 0.348640 |
| 247899_at | A15g57345 | Expressed protein ; supported by full-le expressed protein                           | 179  | 248  | 282  | 274  | 291  | 252  | 237  | 273  | 0.87     | 0.327543 | 136  | 165  | 158  | 206  | 148  | 154  | 180  | 170    | 153      | 172      | 0.89     | 0.262732 | 169      | 0.90     | 0.466121 |
| 247900_at | A15g57290 | 60S acidic ribosomal protein P3 ; supp 60S acidic ribosomal protein P3 (RPP3E        | 1527 | 1761 | 1870 | 1919 | 2063 | 1963 | 1719 | 1982 | 0.87     | 0.075073 | 1587 | 1801 | 1785 | 2250 | 1867 | 1759 | 1959 | 1863   | 1724     | 1940     | 0.89     | 0.128853 | 1959     | 0.88     | 0.226099 |
| 247901_at | A15g57300 | ubiquonemenaucione biosynthesis, Ubic/COO5 methyltransferase family on               | 240  | 319  | 368  | 347  | 389  | 325  | 309  | 354  | 0.87     | 0.345412 | 270  | 272  | 286  | 380  | 303  | 296  | 335  | 329    | 276      | 329      | 0.84     | 0.041542 | 320      | 0.85     | 0.143212 |
| 247902_at | A15g57350 | clasma membrane ATPase 3 (orlon o ATPase 3, clasma membrane-tyce / oro               | 18   | 23   | 25   | 24   | 26   | 20   | 22   | 23   | 0.96     | 0.739014 | 19   | 15   | 18   | 22   | 16   | 19   | 25   | 22     | 17       | 21       | 0.83     | 0.170997 | 19       | 0.90     | 0.462868 |
| 247903_at | A15g57340 | unknown protein                                                                      | 201  | 230  | 225  | 241  | 292  | 212  | 219  | 248  | 0.88     | 0.298082 | 56   | 53   | 68   | 115  | 93   | 88   | 88   | 87     | 59       | 94       | 0.63     | 0.004059 | 99       | 0.60     | 0.013419 |
| 247905_at | A15g57400 | unknown protein                                                                      | 20   | 26   | 32   | 12   | 15   | 16   | 26   | 14   | 1.81     | 0.031728 | 20   | 26   | 25   | 12   | 10   | 12   | 13   | 10     | 24       | 11       | 2.06     | 0.000126 | 11       | 2.09     | 0.002111 |
| 247906_at | A15g57420 | putative protein similar to unknown pr auxin-responsive factor-related               | 26   | 31   | 30   | 31   | 26   | 25   | 29   | 0.91 | 0.429203 | 22       | 20   | 22   | 21   | 20   | 29   | 21   | 22   | 0.96   | 0.681261 | 21       | 1.03     | 0.409586 |          |          |          |
| 247907_at | A15g57460 | unknown protein                                                                      | 316  | 367  | 359  | 431  | 477  | 382  | 347  | 430  | 0.81     | 0.058834 | 325  | 283  | 323  | 439  | 419  | 336  | 372  | 375    | 310      | 388      | 0.80     | 0.025044 | 308      | 0.78     | 0.063156 |
| 247908_at | A15g57440 | GS1-like protein ;autoacted by full-lenno halocid dehaloenase-like hydrolase fa      | 181  | 262  | 251  | 275  | 296  | 239  | 231  | 270  | 0.86     | 0.267024 | 222  | 254  | 241  | 369  | 256  | 268  | 250  | 255    | 239      | 280      | 0.85     | 0.230199 | 208      | 0.80     | 0.185078 |
| 247909_at | A15g57370 | unknown protein ; supported by full-le expressed protein                             | 276  | 358  | 392  | 381  | 443  | 366  | 342  | 397  | 0.86     | 0.258117 | 344  | 480  | 377  | 531  | 391  | 384  | 403  | 411    | 400      | 424      | 0.94     | 0.830942 | 436      | 0.92     | 0.607031 |
| 247910_at | A15g57410 | putative protein similar to unknown pr expressed protein                             | 261  | 351  | 347  | 375  | 407  | 333  | 320  | 372  | 0.86     | 0.222620 | 310  | 318  | 337  | 445  | 342  | 313  | 367  | 336    | 322      | 361      | 0.89     | 0.255634 | 387      | 0.88     | 0.332087 |
| 247911_at | A15g57450 | putative protein contains similarity to D1 DNA repair family protein                 | 35   | 47   | 52   | 48   | 56   | 46   | 45   | 50   | 0.90     | 0.431070 | 35   | 33   | 40   | 40   | 32   | 30   | 32   | 36     | 33       | 36       | 1.04     | 0.608584 | 34       | 1.05     | 0.693728 |
| 247912_at | A15g57480 | putative protein contains similarity to A/ AAA-type ATPase family protein            | 39   | 42   | 64   | 63   | 73   | 73   | 48   | 69   | 0.69     | 0.070688 | 31   | 35   | 38   | 37   | 34   | 52   | 50   | 34     | 42       | 0.82     | 0.194397 | 36       | 0.95     | 0.529318 |          |
| 247913_at | A15g57510 | unknown protein                                                                      | 27   | 31   | 35   | 37   | 34   | 34   | 31   | 35   | 0.89     | 0.183969 | 22   | 23   | 37   | 27   | 24   | 31   | 27   | 32     | 27       | 28       | 0.98     | 0.870168 | 27       | 1.01     | 0.961782 |
| 247914_at | A15g57540 | xyloglucan endotransglycosylase                                                      | 21   | 23   | 29   | 32   | 32   | 29   | 31   | 0.78 | 0.045621 | 19       | 19   | 22   | 22   | 22   | 20   | 23   | 22   | 0.93   | 0.178982 | 21       | 0.95     | 0.436400 |          |          |          |
| 247915_at | A15g57570 | unknown protein similar to unknown pr hypothetical protein                           | 72   | 81   | 107  | 118  | 91   | 110  | 85   | 110  | 0.89     | 0.139418 | 96   | 124  | 132  | 102  | 113  | 111  | 100  | 994052 | 127      | 100      | 0.940521 | 151      | 0.92     | 0.677639 |          |
| 247916_at | A15g57600 | adenosymethionine-8-amino-7-oxonon amino transferase class III family protein        | 129  | 162  | 168  | 218  | 224  | 186  | 153  | 210  | 0.73     | 0.027954 | 154  | 133  | 166  | 219  | 172  | 145  | 203  | 182    | 151      | 184      | 0.82     | 0.119275 | 179      | 0.84     | 0.304015 |
| 247917_at | A15g57600 | putative protein similar to unknown pr expressed protein                             | 58   | 62   | 68   | 102  | 106  | 97   | 63   | 102  | 0.62     | 0.000503 | 29   | 35   | 44   | 37   | 33   | 36   | 50   | 39     | 36       | 39       | 0.92     | 0.554817 | 35       | 1.01     | 0.917530 |
| 247918_at | A15g57610 | putative protein contains similarity to pr protein kinase family protein             | 115  | 166  | 219  | 193  | 236  | 162  | 167  | 197  | 0.85     | 0.045794 | 144  | 135  | 155  | 191  | 157  | 134  | 161  | 152    | 144      | 159      | 0.91     | 0.305888 | 161      | 0.90     | 0.406697 |
| 247919_at | A15g57650 | putative protein similar to unknown pr eukaryotic translation initiation factor-rel  | 16   | 17   | 23   | 20   | 24   | 18   | 19   | 21   | 0.90     | 0.020812 | 9    | 13   | 12   | 15   | 11   | 14   | 10   | 17     | 12       | 16       | 0.85     | 0.367698 | 14       | 0.85     | 0.371624 |
| 247920_at | A15g57670 | putative protein contains similarity to ur protein kinase family protein             | 12   | 20   | 19   | 19   | 19   | 19   | 19   | 19   | 0.90     | 0.477870 | 10   | 21   | 18   | 14   | 13   | 10   | 18   | 16     | 16       | 14       | 1.14     | 0.544027 | 12       | 1.32     | 0.339189 |
| 247921_at | A15g57660 | CONSTANS-like B-box zinc finger orot zinc finger (B-box type) family protein         | 160  | 358  | 273  | 107  | 105  | 60   | 264  | 91   | 2.90     | 0.043055 | 176  | 209  | 168  | 186  | 139  | 147  | 205  | 209    | 184      | 177      | 1.14     | 0.745560 | 157      | 1.17     | 0.225350 |
| 247922_at | A15g57500 | putative protein similar to unknown pr expressed protein                             | 17   | 35   | 15   | 49   | 35   | 18   | 22   | 34   | 0.65     | 0.336138 | 12   | 17   | 18   | 18   | 22   | 20   | 15   | 11     | 15       | 17       | 0.89     | 0.538292 | 20       | 0.77     | 0.103695 |
| 247923_at | A15g57490 | putative protein ; supported by full-len porin, putative                             | 225  | 261  | 271  | 290  | 218  | 250  | 269  | 0.96 | 0.405457 | 286      | 297  | 309  | 367  | 304  | 273  | 290  | 281  | 203    | 267      | 306      | 0.87     | 0.683815 | 315      | 0.92     | 0.407963 |
| 247924_at | A15g57655 | Expressed protein                                                                    | 639  | 882  | 1167 | 866  | 964  | 738  | 896  | 856  | 1.05     | 0.822972 | 758  | 1027 | 821  | 1207 | 974  | 988  | 953  | 941    | 868      | 993      | 0.87     | 0.244407 | 1023     | 0.85     | 0.290731 |
| 247925_at | A15g57560 | TC4H protein (abIAA92363.1) ; succo :volucan:volucosyl transferase / xvl             | 1745 | 900  | 2137 | 1217 | 1370 | 876  | 1594 | 1154 | 1.38     | 0.325372 | 1560 | 1959 | 1000 | 1401 | 1007 | 1048 | 1625 | 1573   | 1506     | 1338     | 1.13     | 0.546098 | 1164     | 1.29     | 0.318222 |
| 247886_at | A15g57550 | endovuloculcan transferase (abIAAD45 :volucan:volucosyl transferase / xvl            | 19   | 20   | 30   | 373  | 28   | 25   | 23   | 142  | 0.16     | 0.361308 | 18   | 22   | 24   | 35   | 30   | 18   | 42   | 34     | 21       | 32       | 0.66     | 0.089085 | 28       | 0.76     | 0.288441 |
| 247887_at | A15g57630 | SNF1 related protein kinase-like protein ; CBL-interacting protein kinase 21, outati | 28   | 36   | 28   | 39   | 31   | 38   | 33   | 1.16 | 0.528505 | 64       | 73   | 63   | 41   | 41   | 30   | 42   | 50   | 52     | 66       | 43       | 1.54     | 0.007944 | 38       | 1.76     | 0.005672 |
| 247888_at | A15g57620 | Myb-related transcription factor-like pro myb family transcription factor (MYB38)    | 13   | 15   | 18   | 16   | 15   | 18   | 14   | 17   | 0.82     | 0.021120 | 6    | 12   | 12   | 16   | 15   | 12   | 11   | 13     | 15       | 0.91     | 0.712933 | 14       | 0.85     | 0.865139 |          |
| 247889_at | A15g57520 | CCHH finger protein 2-like protein (pirl) CCHH finger protein 2-like protein (pirl)  | 21   | 17   | 25   | 22   | 24   | 24   | 21   | 23   | 0.90     | 0.381598 | 21   | 21   | 26   | 24   | 17   | 19   | 21   | 22     | 23       | 20       | 1.12     | 0.317236 | 20       | 1.15     | 0.380235 |
| 247870_at | A15g57580 | calmodulin-binding protein ; supported calmodulin-binding protein                    | 281  | 352  | 373  | 413  | 434  | 326  | 335  | 391  | 0.86     | 0.265890 | 291  | 277  | 295  | 433  | 375  | 309  | 351  | 334    | 288      | 360      | 0.80     | 0.043355 | 372      | 0.77     | 0.080892 |
| 247871_at | A15g57530 | xyloglucan endotransglycosylase ; succo :volucan:volucosyl transferase, out          | 26   | 16   | 19   | 18   | 22   | 18   | 18   | 19   | 0.95     | 0.613475 | 18   | 18   | 17   | 15   | 17   | 18   | 18   | 18     | 17       | 17       | 1.05     | 0.263865 | 16       | 1.09     | 0.086690 |
| 247872_at | A15g57680 | putative protein similar to unknown pr expressed protein                             | 29   | 31   | 31   | 31   | 31   | 31   | 29   | 31   | 0.92     | 0.237462 | 25   | 24   | 23   | 24   | 22   | 19   | 11   | 25     | 22       | 24       | 1.19     | 0.127680 | 25       | 1.24     | 0.156863 |
| 247873_at | A15g57690 | diacylglycerol kinase-like protein                                                   | 59   | 60   | 79   | 90   | 87   | 83   | 66   | 87   | 0.76     | 0.035785 | 42   | 44   | 54   | 59   | 56   | 54   | 58   | 61     | 0.91     | 0.015101 | 57       | 0.88     | 0.080076 |          |          |
| 247874_at | A15g57710 | 101 kDa heat shock protein; HSP101-le heat shock protein-related                     | 152  | 214  | 213  | 202  | 232  | 173  | 193  | 202  | 0.95     | 0.739530 | 156  | 148  | 153  | 188  | 160  | 137  | 202  | 194    | 152      | 176      | 0.86     | 0.190738 | 162      | 0.94     | 0.563980 |
| 247875_at | A15g57720 | putative protein similar to unknown pr transcription factor B3 family protein        | 59   | 74   | 66   | 56   | 66   | 53   | 66   | 58   | 1.14     | 0.22     |      |      |      |      |      |      |      |        |          |          |          |          |          |          |          |

|           |           |                                                                                       |      |      |      |      |      |      |      |      |          |          |      |      |      |      |      |      |      |      |      |          |          |          |          |          |          |
|-----------|-----------|---------------------------------------------------------------------------------------|------|------|------|------|------|------|------|------|----------|----------|------|------|------|------|------|------|------|------|------|----------|----------|----------|----------|----------|----------|
| 247858_at | A15f58220 | similar to unknown protein (pilT34863 expressed protein                               | 207  | 254  | 271  | 310  | 288  | 236  | 244  | 278  | 0.88     | 0.307615 | 272  | 305  | 296  | 405  | 346  | 313  | 323  | 304  | 291  | 338      | 0.86     | 0.109772 | 355      | 0.82     | 0.089457 |
| 247859_at | A15f58410 | unknown protein                                                                       | 210  | 270  | 311  | 277  | 338  | 236  | 244  | 284  | 0.93     | 0.650517 | 220  | 177  | 219  | 247  | 214  | 195  | 231  | 218  | 205  | 221      | 0.93     | 0.344234 | 218      | 0.94     | 0.552768 |
| 247860_at | A15f58240 | bis(5'-adenosyl)-triphosphatase-like; a bis(5'-adenosyl)-triphosphatase, putative     | 449  | 659  | 695  | 720  | 850  | 690  | 634  | 753  | 0.84     | 0.144306 | 642  | 773  | 748  | 1070 | 812  | 800  | 733  | 748  | 721  | 832      | 0.87     | 0.249321 | 894      | 0.81     | 0.149126 |
| 247861_at | A15f58160 | ATPase similar to unknown protein (at form homolog 2 domain-containing or             | 24   | 36   | 41   | 35   | 26   | 29   | 35   | 0.79 | 0.257113 | 29       | 22   | 32   | 24   | 22   | 26   | 23   | 27   | 26   | 28   | 22       | 0.79     | 0.45231  | 25       | 0.80     | 0.103127 |
| 247862_at | A15f58230 | similar to unknown protein (pilT27277) expressed protein                              | 234  | 385  | 333  | 357  | 378  | 319  | 317  | 351  | 0.90     | 0.518710 | 333  | 458  | 433  | 490  | 371  | 348  | 412  | 428  | 408  | 410      | 0.99     | 0.962873 | 403      | 1.01     | 0.940981 |
| 247863_at | A15f58340 | similar to unknown protein (piJIAF631) expressed protein                              | 68   | 96   | 82   | 98   | 126  | 86   | 82   | 103  | 0.79     | 0.202210 | 87   | 83   | 100  | 125  | 105  | 105  | 106  | 98   | 90   | 108      | 0.84     | 0.046524 | 112      | 0.81     | 0.060344 |
| 247864_at | A15f58170 | strong similarity to unknown protein (piIc3) glycerophosphoryl diester phosphodiester | 51   | 45   | 65   | 59   | 68   | 62   | 54   | 63   | 0.85     | 0.214712 | 27   | 29   | 31   | 35   | 26   | 25   | 35   | 39   | 29   | 32       | 0.81     | 0.435453 | 29       | 1.01     | 0.946024 |
| 247865_at | A15f58180 | ATPase similar to unknown protein (at form homolog 2 domain-containing or             | 24   | 36   | 41   | 35   | 26   | 29   | 35   | 0.79 | 0.257113 | 29       | 22   | 32   | 24   | 22   | 26   | 23   | 27   | 26   | 28   | 22       | 0.79     | 0.45231  | 25       | 0.80     | 0.103127 |
| 247866_at | A15f58270 | ABC transporter-like protein; a superoxide mitochondrial half-ABC transporter (STA    | 305  | 368  | 355  | 420  | 456  | 367  | 342  | 414  | 0.83     | 0.090048 | 330  | 263  | 340  | 402  | 391  | 356  | 345  | 311  | 357  | 0.87     | 0.196610 | 361      | 0.86     | 0.307925 |          |
| 247867_at | A15f58360 | similar to unknown protein (obIAAB30) ovate family protein                            | 29   | 30   | 33   | 35   | 41   | 37   | 31   | 38   | 0.82     | 0.033604 | 24   | 24   | 30   | 27   | 26   | 28   | 29   | 29   | 26   | 28       | 0.94     | 0.377148 | 27       | 0.97     | 0.737835 |
| 247868_at | A15f58190 | contains similarity to unknown protein ( expressed protein                            | 105  | 147  | 154  | 164  | 192  | 148  | 136  | 168  | 0.81     | 0.179779 | 151  | 137  | 153  | 220  | 175  | 162  | 147  | 148  | 147  | 171      | 0.86     | 0.243652 | 186      | 0.79     | 0.100208 |
| 247869_at | A15f58280 | unknown protein                                                                       | 131  | 106  | 167  | 167  | 185  | 172  | 163  | 189  | 0.86     | 0.177613 | 127  | 119  | 148  | 200  | 153  | 145  | 151  | 152  | 131  | 160      | 0.82     | 0.102338 | 166      | 0.79     | 0.151521 |
| 247870_at | A15f58200 | 2S5 proteasome AAA-ATPase subunit                                                     | 1031 | 1706 | 1627 | 1984 | 2063 | 1742 | 1555 | 1930 | 0.81     | 0.061644 | 1460 | 1570 | 1585 | 2150 | 1852 | 1576 | 1850 | 1800 | 1538 | 1846     | 0.83     | 0.049722 | 1860     | 0.83     | 0.132431 |
| 247871_at | A15f58430 | leucine zipper-containing protein leucic oxidase subunit EXO70 family protein         | 613  | 641  | 802  | 1058 | 1156 | 810  | 685  | 1008 | 0.68     | 0.053033 | 389  | 342  | 379  | 545  | 466  | 387  | 555  | 532  | 370  | 497      | 0.74     | 0.026267 | 466      | 0.79     | 0.114377 |
| 247872_at | A15f58390 | peroxidase; supported by full-length cD peroxidase, putative                          | 18   | 22   | 21   | 21   | 19   | 20   | 20   | 1.01 | 0.915452 | 18       | 16   | 16   | 18   | 16   | 18   | 17   | 13   | 18   | 19   | 16       | 0.77     | 0.066968 | 16       | 1.03     | 0.796101 |
| 247873_at | A15f58330 | NADP-dependent malate dehydrogenase 4 malate dehydrogenase (NADP), chloro             | 506  | 821  | 738  | 778  | 798  | 690  | 689  | 755  | 0.91     | 0.547071 | 757  | 781  | 860  | 1161 | 868  | 864  | 987  | 938  | 799  | 963      | 0.83     | 0.074110 | 964      | 0.83     | 0.158085 |
| 247874_at | A15f58310 | chloroform dehydrogenase-like; a hydrolyase, alpha/beta fold family protein           | 21   | 23   | 26   | 27   | 24   | 23   | 26   | 30   | 0.90     | 0.257941 | 30   | 25   | 29   | 21   | 19   | 21   | 18   | 17   | 28   | 19       | 1.44     | 0.001944 | 20       | 1.35     | 0.012480 |
| 247875_at | A15f58420 | ribosomal protein S4; a ribosomal a40S ribosomal protein S4 (RPS4D)                   | 2335 | 2744 | 2748 | 2702 | 3024 | 2650 | 2609 | 2792 | 0.93     | 0.361080 | 2410 | 2716 | 2666 | 3166 | 2386 | 2789 | 2365 | 2977 | 2818 | 2597     | 0.92     | 0.280845 | 2763     | 0.94     | 0.531242 |
| 247876_at | A15f58260 | similar to unknown protein (pilI575584 expressed protein                              | 55   | 93   | 85   | 104  | 88   | 81   | 77   | 91   | 0.85     | 0.369787 | 61   | 59   | 80   | 95   | 63   | 72   | 80   | 66   | 66   | 75       | 0.88     | 0.370824 | 77       | 0.86     | 0.420947 |
| 247877_at | A15f58375 | Expressed protein; supported by full-length expressed protein                         | 602  | 856  | 862  | 872  | 984  | 750  | 773  | 869  | 0.89     | 0.429922 | 701  | 687  | 738  | 1174 | 1046 | 895  | 943  | 932  | 709  | 998      | 0.71     | 0.005514 | 1039     | 0.68     | 0.015877 |
| 247878_at | A15f58370 | contains similarity to GTP-binding protein expressed protein                          | 134  | 175  | 180  | 199  | 192  | 176  | 163  | 189  | 0.86     | 0.177613 | 127  | 119  | 148  | 200  | 153  | 145  | 151  | 152  | 131  | 160      | 0.82     | 0.102338 | 166      | 0.79     | 0.151521 |
| 247879_at | A15f58350 | MAP kinase; supported by cDNA: a 1 protein kinase family protein                      | 93   | 156  | 174  | 133  | 163  | 134  | 141  | 143  | 0.98     | 0.934633 | 140  | 146  | 145  | 219  | 152  | 142  | 220  | 216  | 144  | 190      | 0.76     | 0.096539 | 171      | 0.84     | 0.322220 |
| 247880_at | A15f58380 | serine/threonine kinase kinase; a Homo CBL-interactin protein kinase 10 (CIPK         | 108  | 149  | 157  | 167  | 169  | 144  | 138  | 160  | 0.86     | 0.287775 | 89   | 85   | 102  | 134  | 112  | 99   | 108  | 99   | 92   | 110      | 0.83     | 0.093547 | 115      | 0.80     | 0.112882 |
| 247881_at | A15f58230 | WD-40 repeat protein MSI1 (iso02246: WD-40 repeat protein (MSI1)                      | 651  | 768  | 770  | 970  | 1004 | 883  | 730  | 953  | 0.77     | 0.013790 | 778  | 821  | 786  | 1238 | 943  | 834  | 947  | 887  | 795  | 970      | 0.82     | 0.112728 | 1005     | 0.79     | 0.158637 |
| 247882_at | A15f58440 | putative protein sorting nexin 2, Homo phox (PX) domain-containing protein            | 214  | 290  | 292  | 316  | 353  | 296  | 266  | 322  | 0.83     | 0.136331 | 229  | 220  | 251  | 332  | 269  | 231  | 275  | 252  | 233  | 272      | 0.86     | 0.150619 | 277      | 0.84     | 0.225833 |
| 247883_at | A15f58450 | putative protein predicted proteins from expressed protein                            | 1959 | 226  | 235  | 262  | 208  | 227  | 235  | 0.97 | 0.774919 | 200      | 184  | 225  | 357  | 200  | 230  | 219  | 203  | 220  | 0.92 | 0.367687 | 217      | 0.94     | 0.584433 |          |          |
| 247884_at | A15f58460 | putative protein Na+/H+-exchanging p cation/hydrogen exchanger; putative (C3          | 16   | 24   | 32   | 30   | 33   | 37   | 24   | 33   | 0.73     | 0.142635 | 14   | 13   | 19   | 22   | 16   | 15   | 18   | 19   | 15   | 18       | 0.84     | 0.250222 | 18       | 0.85     | 0.440459 |
| 247885_at | A15f58470 | RNAseDNA-binding protein; a like RNA zinc finger (Ran-binding) family protein         | 200  | 263  | 226  | 268  | 317  | 248  | 230  | 278  | 0.83     | 0.156649 | 263  | 280  | 257  | 331  | 282  | 279  | 262  | 253  | 267  | 281      | 0.95     | 0.463928 | 297      | 0.90     | 0.173583 |
| 247886_at | A15f58480 | putative protein predicted proteins from expressed protein                            | 213  | 291  | 226  | 262  | 301  | 242  | 243  | 268  | 0.91     | 0.448408 | 222  | 163  | 236  | 273  | 229  | 201  | 266  | 234  | 214  | 241      | 0.89     | 0.247181 | 235      | 0.91     | 0.475610 |
| 247887_at | A15f58500 | putative protein predicted proteins from expressed protein                            | 31   | 34   | 53   | 48   | 47   | 34   | 42   | 34   | 0.84     | 0.036664 | 34   | 42   | 34   | 33   | 34   | 35   | 34   | 36   | 48   | 34       | 1.02     | 0.158543 | 33       | 1.11     | 0.213708 |
| 247888_at | A15f58510 | putative protein KIAA0066, Homo sapi glycosyl transferase                             | 164  | 215  | 230  | 226  | 278  | 203  | 203  | 235  | 0.86     | 0.333924 | 157  | 133  | 139  | 177  | 166  | 135  | 164  | 149  | 143  | 158      | 0.91     | 0.230032 | 159      | 0.90     | 0.329837 |
| 247889_at | A15f58520 | protein kinase - like protein kinase AAT protein kinase family protein                | 161  | 254  | 217  | 264  | 306  | 224  | 211  | 265  | 0.80     | 0.206903 | 218  | 220  | 210  | 269  | 224  | 214  | 289  | 265  | 216  | 252      | 0.86     | 0.110564 | 238      | 0.92     | 0.327609 |
| 247890_at | A15f58530 | putative protein predicted proteins; Axi glutaredoxin family protein                  | 117  | 144  | 136  | 171  | 170  | 166  | 132  | 169  | 0.78     | 0.010996 | 116  | 123  | 132  | 165  | 136  | 144  | 147  | 124  | 159  | 0.78     | 0.075787 | 168      | 0.74     | 0.026296 |          |
| 247891_at | A15f58540 | putative protein predicted proteins; Axi glutaredoxin family protein                  | 24   | 25   | 33   | 32   | 34   | 32   | 27   | 31   | 0.87     | 0.234413 | 36   | 25   | 30   | 29   | 24   | 21   | 26   | 23   | 27   | 24       | 1.12     | 0.257874 | 24       | 1.13     | 0.368722 |
| 247892_at | A15f58550 | putative protein predicted proteins; Axi glutaredoxin family protein                  | 43   | 52   | 59   | 67   | 73   | 62   | 52   | 67   | 0.77     | 0.053386 | 39   | 36   | 41   | 46   | 42   | 39   | 41   | 39   | 42   | 0.93     | 0.202935 | 42       | 0.92     | 0.279774 |          |
| 247893_at | A15f58575 | phosphatidate cys/diolyltransferase famli                                             | 91   | 138  | 147  | 118  | 158  | 109  | 125  | 128  | 0.98     | 0.905033 | 112  | 142  | 128  | 199  | 150  | 150  | 152  | 151  | 127  | 160      | 0.79     | 0.058834 | 166      | 0.77     | 0.099832 |
| 247894_at | A15f58490 | cinnamoyl-CoA reductase - like protein cinnamoyl-CoA reductase family                 | 509  | 622  | 680  | 744  | 891  | 653  | 604  | 763  | 0.79     | 0.137281 | 780  | 895  | 833  | 1223 | 1022 | 956  | 952  | 931  | 836  | 1017     | 0.82     | 0.053995 | 1067     | 0.78     | 0.056363 |
| 247895_at | A15f58560 | Expressed protein; supported by full-length expressed protein                         | 16   | 28   | 29   | 24   | 27   | 24   | 27   | 0.90 | 0.564198 | 27       | 30   | 23   | 25   | 26   | 27   | 38   | 31   | 29   | 27   | 38       | 0.97     | 0.09073  | 36       | 1.02     | 0.629599 |
| 247896_at | A15f58560 | putative protein predicted proteins from expressed protein                            | 90   | 127  | 108  | 149  | 177  | 128  | 109  | 151  | 0.72     | 0.070615 | 69   | 74   | 61   | 114  | 88   | 84   | 105  | 94   | 68   | 97       | 0.70     | 0.010603 | 95       | 0.72     | 0.053073 |
| 247897_at | A15f58580 | putative protein RING-H2 zinc finger; a zinc finger (C3HC4-type RING finger) fa       | 37   | 33   | 35   | 24   | 27   | 26   | 31   | 26   | 1.21     | 0.102226 | 18   | 21   | 23   | 22   | 17   | 18   | 24   | 21   | 20   | 1.04     | 0.744764 | 19       | 1.09     | 0.479934 |          |
| 247898_at | A15f58590 | Ran binding protein 1 homolog; a like Ran-binding protein 1, putative / RanBP         | 290  | 568  | 489  | 598  | 754  | 523  | 482  | 625  | 0.77     | 0.169241 | 725  | 781  | 767  | 1032 | 783  | 728  | 702  | 668  | 758  | 782      | 0.97     | 0.786838 | 847      | 0.89     | 0.397589 |
| 247899_at | A15f58610 | putative protein various predicted prot PHD finger transcription factor; putative     | 68   | 90   | 93   | 93   | 107  | 85   | 84   | 95   | 0.88     | 0.341249 | 58   | 39   | 62   | 44   | 58   | 46   | 54   | 51   | 53   | 51       | 1.04     | 0.730005 | 49       | 1.07     | 0.685026 |
| 247900_at | A15f58630 | putative protein predicted proteins from expressed protein                            | 27   | 34   | 39   | 42   | 37   | 34   | 39   | 0.87 | 0.254863 | 32       | 31   | 34   | 32   | 31   | 32   | 38   | 36   | 31   | 32   | 36       | 1.01     | 0.820447 | 36       | 1.06     | 0.650218 |
| 247901_at | A15f58660 | putative protein full ripening expresse oxidoreductase, 2OG-Fe(II) oxynase I          | 20   | 34   | 31   | 40   | 38   | 41   | 28   | 40   | 0.70     | 0.053644 | 30   | 40   | 37   | 41   | 32   | 43   | 38   | 40   | 36   | 39       | 0.93     | 0.409252 | 39       | 0.93     | 0.557413 |
| 247902_at | A15f58690 | phosphonositide-specific phospholipase: phosphonositide-specific phospholipase        | 25   | 46   | 47   | 48   | 42   | 36   | 46   | 0.78 | 0.189621 | 23       | 28   | 34   | 36   | 31   | 34   | 35   | 34   | 28   | 34   | 0.83     | 0.057355 | 34       | 0.83     | 0.176470 |          |
| 247903_at | A15f58700 | phosphonositide-specific phospholipase: phosphonositide-specific phospholipase        | 42   | 61   | 52   | 68   | 75   | 61   | 51   | 68   | 0.75     | 0.087968 | 48   | 41   | 46   | 64   | 65   | 50   | 57   | 63   | 45   | 62       | 0.73     | 0.071778 | 60       | 0.76     | 0.045686 |
| 247904_at | A15f58740 | putative protein MNUDC protein; Homo nuclear movement family protein                  | 92   | 97   | 103  | 103  | 103  | 98   | 81   | 108  | 0.83     | 0.337603 | 103  | 113  | 115  | 116  | 103  | 106  | 113  | 113  | 108  | 125      | 1.02     | 0.158140 | 129      | 0.84     | 0.226874 |
| 247905_at | A15f58750 | wound stress induced protein - like wound-responsive protein-related                  | 14   | 13   | 17   | 19   | 17   | 19   | 15   | 18   |          |          |      |      |      |      |      |      |      |      |      |          |          |          |          |          |          |

|             |           |                                                                                  |                                                 |     |     |      |      |     |      |      |          |          |          |      |      |      |      |      |      |      |          |          |      |          |          |          |          |          |          |
|-------------|-----------|----------------------------------------------------------------------------------|-------------------------------------------------|-----|-----|------|------|-----|------|------|----------|----------|----------|------|------|------|------|------|------|------|----------|----------|------|----------|----------|----------|----------|----------|----------|
| 247763_at   | A15g59180 | RNA polymerase II                                                                | DNA-directed RNA polymerase II                  | 298 | 403 | 423  | 519  | 550 | 444  | 375  | 504      | 0.74     | 0.060793 | 354  | 394  | 423  | 644  | 462  | 476  | 460  | 416      | 391      | 492  | 0.79     | 0.113705 | 528      | 0.74     | 0.091013 |          |
| 247764_at   | A15g59190 | subtilisin-like serine protease contains : subtilase family protein              |                                                 | 45  | 53  | 65   | 63   | 59  | 64   | 54   | 62       | 0.88     | 0.283131 | 49   | 57   | 61   | 44   | 37   | 32   | 41   | 39       | 55       | 39   | 1.44     | 0.004263 | 38       | 1.47     | 0.023990 |          |
| 247737_at   | A15g59200 | outative protein various predicted orot. pentatricopeptide (PPR) repeat-contains |                                                 | 13  | 15  | 21   | 19   | 21  | 24   | 16   | 21       | 0.77     | 0.160219 | 13   | 14   | 24   | 19   | 16   | 12   | 18   | 16       | 10       | 17   | 1.6      | 0.06     | 0.765454 | 16       | 1.10     | 0.733490 |
| 247738_at   | A15g59240 | 40S ribosomal protein S8 - like 40S rib. r                                       | cytosin heavy chain-related                     | 277 | 337 | 390  | 347  | 416 | 340  | 333  | 387      | 0.98     | 0.244744 | 271  | 349  | 394  | 416  | 351  | 287  | 354  | 357      | 294      | 351  | 1.23     | 0.154041 | 361      | 1.10     | 0.625493 |          |
| 247739_at   | A15g59240 | 40S ribosomal protein S8 - like 40S rib. r                                       | 40S ribosomal protein S8 (RP58B)                | 107 | 116 | 132  | 88   | 92  | 78   | 118  | 86       | 1.37     | 0.018662 | 65   | 71   | 86   | 50   | 45   | 40   | 49   | 42       | 74       | 45   | 1.63     | 0.001880 | 45       | 1.64     | 0.015459 |          |
| 247709_at   | A15g59250 | D-xyllose-H+ symporter - like protein D                                          | sugar transporter family protein                | 150 | 191 | 182  | 207  | 237 | 179  | 175  | 208      | 0.84     | 0.190563 | 133  | 115  | 131  | 193  | 150  | 132  | 163  | 150      | 126      | 158  | 0.80     | 0.068070 | 159      | 0.80     | 0.167456 |          |
| 247710_at   | A15g59260 | receptor-like protein kinase receptor-l                                          | ectin protein kinase, putative                  | 22  | 30  | 28   | 32   | 39  | 30   | 27   | 34       | 0.80     | 0.129881 | 18   | 21   | 25   | 19   | 20   | 23   | 30   | 20       | 21       | 22   | 0.95     | 0.741753 | 21       | 1.04     | 0.743874 |          |
| 247711_at   | A15g59270 | receptor-like protein kinase receptor-l                                          | ectin protein kinase family protein             | 12  | 10  | 12   | 6    | 8   | 9    | 0.87 | 0.381068 | 6        | 8        | 9    | 7    | 6    | 5    | 8    | 7    | 6    | 5        | 7        | 1.33 | 0.209314 | 6        | 1.35     | 0.158411 |          |          |
| 247712_at   | A15g59300 | E2, ubiquitin-conjugatino enzyme 7 (U                                            | ubiquitin-conjugating enzyme 7 (UBC7)           | 209 | 277 | 293  | 357  | 400 | 292  | 259  | 349      | 0.74     | 0.092103 | 274  | 257  | 317  | 444  | 329  | 331  | 303  | 279      | 282      | 337  | 0.84     | 0.216920 | 368      | 0.77     | 0.110209 |          |
| 247713_at   | A15g59330 | outative protein nonsecofic lipid-transf                                         | er protein                                      | 21  | 24  | 63   | 43   | 33  | 35   | 35   | 37       | 0.96     | 0.913322 | 39   | 49   | 59   | 63   | 38   | 45   | 54   | 55       | 49       | 51   | 0.96     | 0.764468 | 49       | 1.01     | 0.979605 |          |
| 247714_at   | A15g59340 | wuschel protein - like wuschel protein.                                          | homeobox-leucine ziozer transcription f         | 39  | 53  | 59   | 55   | 53  | 52   | 56   | 0.75     | 0.092926 | 32       | 31   | 37   | 32   | 32   | 33   | 41   | 40   | 33       | 36       | 0.94 | 0.470484 | 32       | 1.03     | 0.609664 |          |          |
| 247715_at   | A15g59360 | outative protein predicted protein.                                              | Arat. expressed protein                         | 44  | 58  | 54   | 61   | 56  | 53   | 42   | 58       | 0.68     | 0.052207 | 65   | 64   | 70   | 86   | 51   | 53   | 57   | 53       | 66       | 56   | 1.19     | 0.033542 | 57       | 1.17     | 0.126519 |          |
| 247716_at   | A15g59350 | outative protein predicted protein.                                              | Arat. expressed protein                         | 62  | 77  | 68   | 75   | 72  | 61   | 69   | 69       | 0.99     | 0.898713 | 69   | 62   | 70   | 89   | 72   | 67   | 61   | 64       | 67       | 70   | 0.95     | 0.616141 | 76       | 0.88     | 0.287022 |          |
| 247717_at   | A15g59320 | nonsecofic lipid-transfer protein precu                                          | lipid transfer protein 3 (LTP3)                 | 536 | 585 | 1617 | 1439 | 659 | 1017 | 912  | 1038     | 0.88     | 0.778764 | 3883 | 3670 | 4160 | 4003 | 3427 | 3261 | 3428 | 3388     | 3904     | 3501 | 1.12     | 0.091631 | 3564     | 1.10     | 0.269285 |          |
| 247718_at   | A15g59310 | nonsecofic lipid-transfer protein precu                                          | lipid transfer protein 4 (LTP4)                 | 94  | 300 | 242  | 141  | 212 | 164  | 198  | 0.83     | 0.667546 | 391      | 404  | 414  | 638  | 382  | 381  | 493  | 567  | 403      | 492      | 0.82 | 0.265039 | 467      | 0.86     | 0.495420 |          |          |
| 247719_at   | A15g59305 | Exressed protein : supported by full-l                                           | expressed protein                               | 10  | 19  | 13   | 21   | 15  | 16   | 14   | 17       | 0.79     | 0.307589 | 14   | 12   | 19   | 16   | 11   | 17   | 12   | 16       | 15       | 14   | 1.05     | 0.784897 | 14       | 1.04     | 0.854475 |          |
| 247720_at   | A15g59290 | dUDP-glucose 4-6-dehydratase - like                                              | c UDP-glucuronic acid hydrolase f               | 352 | 369 | 403  | 473  | 486 | 413  | 374  | 457      | 0.82     | 0.038813 | 256  | 331  | 314  | 553  | 400  | 338  | 368  | 355      | 300      | 403  | 0.75     | 0.103261 | 430      | 0.70     | 0.128075 |          |
| 247721_at   | A15g59140 | eloinin - like protein eloinin C. Drosoc                                         | SKP1 family protein                             | 506 | 728 | 815  | 684  | 797 | 611  | 683  | 697      | 0.88     | 0.900426 | 714  | 800  | 689  | 1032 | 786  | 803  | 845  | 786      | 735      | 850  | 0.86     | 0.134086 | 874      | 0.84     | 0.181959 |          |
| 247722_at   | A15g59150 | GTP-binding protein 2C11 - like GTP-I                                            | Ras-related GTP-binding protein, putati         | 286 | 360 | 394  | 415  | 482 | 358  | 347  | 418      | 0.83     | 0.210178 | 310  | 312  | 332  | 502  | 401  | 381  | 404  | 388      | 318      | 415  | 0.77     | 0.017094 | 428      | 0.74     | 0.044164 |          |
| 247723_at   | A15g59220 | outative protein phosphatase 2B - like                                           | ABA and protein phosphatase 2C, putative / PP2c | 171 | 304 | 870  | 206  | 248 | 163  | 448  | 206      | 2.18     | 0.323548 | 180  | 167  | 166  | 244  | 228  | 235  | 283  | 289      | 271      | 256  | 0.67     | 0.002649 | 438      | 0.73     | 0.000615 |          |
| 247724_at   | A15g59380 | outative protein predicted protein.                                              | Arat. methyl-CoG-binding domain-contains        | 214 | 302 | 318  | 310  | 357 | 297  | 278  | 321      | 0.87     | 0.300493 | 210  | 273  | 241  | 360  | 264  | 259  | 297  | 294      | 291      | 291  | 0.83     | 0.122102 | 294      | 0.82     | 0.229005 |          |
| 247725_at   | A15g59410 | outative Rab5-interacting protein.                                               | like. expressed protein                         | 198 | 225 | 245  | 255  | 284 | 223  | 223  | 254      | 0.88     | 0.234177 | 214  | 227  | 203  | 340  | 274  | 241  | 268  | 238      | 215      | 272  | 0.79     | 0.061169 | 285      | 0.75     | 0.078452 |          |
| 247726_at   | A15g59430 | telomere repeat-binding protein                                                  | telomere repeat-binding domain 1 (TRP1)         | 134 | 182 | 166  | 192  | 209 | 163  | 181  | 188      | 0.85     | 0.235170 | 119  | 96   | 128  | 149  | 138  | 124  | 152  | 140      | 115      | 141  | 0.81     | 0.034255 | 137      | 0.84     | 0.134317 |          |
| 247727_at   | A15g59490 | outative rinenio-related protein - like                                          | c haloacid dehaloenase-like hydrolase f         | 53  | 56  | 60   | 61   | 69  | 55   | 56   | 61       | 0.92     | 0.329422 | 40   | 52   | 56   | 44   | 45   | 49   | 46   | 49       | 49       | 47   | 1.06     | 0.465699 | 46       | 1.08     | 0.518597 |          |
| 247728_at   | A15g59510 | outative protein                                                                 | putative protein                                | 8   | 6   | 10   | 8    | 10  | 7    | 10   | 0.74     | 0.168177 | 7        | 11   | 10   | 9    | 7    | 10   | 9    | 8    | 121      | 0.293049 | 7    | 1.25     | 0.332953 |          |          |          |          |
| 247729_at   | A15g59530 | 1-aminocyclopropane-1-carboxylate o                                              | 2-oxoacid-dependent decarboxenase,              | 6   | 12  | 15   | 10   | 14  | 12   | 11   | 12       | 0.95     | 0.821081 | 14   | 7    | 13   | 9    | 13   | 11   | 10   | 11       | 11       | 11   | 1.08     | 0.636527 | 11       | 1.06     | 0.794643 |          |
| 247730_at   | A15g59580 | glucuronosyl transferase - like protein                                          | UDP-glucuronosylUDP-glucosyl transfe            | 13  | 16  | 22   | 22   | 22  | 23   | 17   | 22       | 0.77     | 0.119809 | 16   | 18   | 16   | 22   | 19   | 17   | 24   | 20       | 17       | 21   | 0.82     | 0.071073 | 20       | 0.87     | 0.149611 |          |
| 247731_at   | A15g59590 | glucuronosyl transferase - like protein                                          | UDP-glucuronosylUDP-glucosyl transfe            | 28  | 36  | 41   | 45   | 47  | 43   | 35   | 45       | 0.78     | 0.068757 | 30   | 32   | 43   | 34   | 40   | 34   | 31   | 29       | 35       | 34   | 1.05     | 0.682908 | 36       | 0.98     | 0.862532 |          |
| 247732_at   | A15g59600 | outative protein various predicted orot.                                         | pentatricopeptide (PPR) repeat-contains         | 29  | 32  | 36   | 44   | 46  | 45   | 33   | 45       | 0.72     | 0.003718 | 30   | 32   | 38   | 38   | 35   | 37   | 35   | 37       | 35       | 33   | 0.92     | 0.175225 | 37       | 0.91     | 0.250211 |          |
| 247733_at   | A15g59610 | outative protein heat shock protein 40                                           | (DNA) heat shock protein                        | 42  | 62  | 68   | 62   | 68  | 62   | 68   | 62       | 0.78     | 0.040556 | 34   | 61   | 74   | 111  | 86   | 75   | 85   | 89       | 0.38372  | 85   | 0.87     | 0.216146 |          |          |          |          |
| 247734_at   | A15g59400 | putative protein predicted protein.                                              | Arat. expressed protein                         | 77  | 117 | 116  | 118  | 125 | 92   | 103  | 112      | 0.92     | 0.673702 | 107  | 117  | 116  | 168  | 123  | 112  | 121  | 106      | 113      | 126  | 0.90     | 0.428560 | 134      | 0.84     | 0.293823 |          |
| 247735_at   | A15g59440 | thymidylate kinase - like thymic thymidylate                                     | kinase family protein                           | 298 | 443 | 503  | 451  | 480 | 359  | 415  | 430      | 0.96     | 0.837086 | 401  | 512  | 438  | 637  | 450  | 484  | 525  | 502      | 540      | 520  | 0.87     | 0.205385 | 524      | 0.86     | 0.331101 |          |
| 247736_at   | A15g59370 | actin 4 - supported by full-length cDNA.                                         | actin 4 (ACT4)                                  | 48  | 52  | 64   | 62   | 63  | 62   | 54   | 62       | 0.87     | 0.170050 | 40   | 40   | 37   | 46   | 34   | 31   | 42   | 34       | 39       | 38   | 1.04     | 0.715478 | 37       | 1.06     | 0.683070 |          |
| 247702_at   | A15g59420 | outative protein                                                                 | supported by full-lenc expressed protein        | 217 | 207 | 278  | 304  | 211 | 195  | 264  | 0.74     | 0.098157 | 183      | 173  | 186  | 276  | 208  | 223  | 169  | 181  | 276      | 223      | 0.81 | 0.163203 | 224      | 0.77     | 0.065402 |          |          |
| 247703_at   | A15g59560 | outative protein predicted protein.                                              | Arat. expressed protein                         | 168 | 232 | 239  | 255  | 289 | 215  | 213  | 253      | 0.84     | 0.266181 | 187  | 203  | 216  | 325  | 240  | 235  | 246  | 235      | 202      | 256  | 0.79     | 0.062471 | 267      | 0.76     | 0.098236 |          |
| 247704_at   | A15g59515 | Exressed protein : supported by full-l                                           | expressed protein                               | 15  | 15  | 16   | 20   | 17  | 15   | 15   | 18       | 0.85     | 0.146249 | 15   | 15   | 19   | 17   | 14   | 18   | 24   | 13       | 16       | 17   | 0.96     | 0.810028 | 16       | 1.02     | 0.857263 |          |
| 247705_at   | A15g59460 | putative protein - supported by full-lenc                                        | scarcrow-like transcription factor 11 (S1       | 217 | 304 | 312  | 281  | 285 | 248  | 277  | 271      | 1.02     | 0.859155 | 279  | 310  | 292  | 404  | 311  | 294  | 300  | 285      | 294      | 319  | 0.92     | 0.429742 | 337      | 0.87     | 0.292030 |          |
| 247706_at   | A15g59470 | outative protein                                                                 | supported by full-lenc expressed protein        | 34  | 71  | 38   | 298  | 275 | 226  | 49   | 267      | 0.78     | 0.034777 | 76   | 85   | 92   | 440  | 258  | 240  | 84   | 260      | 270      | 288  | 0.88     | 0.002588 | 48       | 0.86     | 0.212598 |          |
| 247707_at   | A15g59450 | scarcrow-like 11 - like scarcrow-like                                            | scarcrow-like transcription factor 11 (S1       | 219 | 210 | 278  | 273  | 352 | 255  | 236  | 294      | 0.80     | 0.189941 | 167  | 193  | 156  | 267  | 177  | 193  | 213  | 214      | 172      | 213  | 0.81     | 0.075010 | 212      | 0.81     | 0.245068 |          |
| 247708_at   | A15g59550 | outative protein COP1-interactio                                                 | zinc finger (C3HC4-vne RING fincer) f           | 396 | 374 | 418  | 538  | 590 | 400  | 396  | 510      | 0.78     | 0.122553 | 256  | 250  | 288  | 404  | 341  | 321  | 347  | 334      | 265      | 349  | 0.76     | 0.006919 | 355      | 0.75     | 0.031000 |          |
| 247677_at   | A15g59420 | oxysterol-binding protein - like oxysterol                                       | oxysterol-binding protein family protein        | 440 | 447 | 544  | 595  | 621 | 539  | 477  | 585      | 0.82     | 0.080294 | 494  | 470  | 514  | 730  | 631  | 524  | 655  | 603      | 492      | 629  | 0.78     | 0.024992 | 628      | 0.78     | 0.089670 |          |
| 247678_at   | A15g59520 | outative zinc transporter ZIP2 - like ZIP2                                       | zinc transporter (ZIP2)                         | 46  | 56  | 46   | 55   | 47  | 44   | 49   | 0.80     | 0.496922 | 47       | 40   | 47   | 45   | 32   | 29   | 32   | 28   | 33       | 44       | 31   | 1.43     | 0.000901 | 51       | 1.43     | 0.027511 |          |
| 247679_at   | A15g59540 | 1-aminocyclopropane-1-carboxylate o                                              | oxidoreductase, 2OG-Fe(II) oxynasee f           | 29  | 34  | 42   | 31   | 29  | 34   | 35   | 33       | 1.06     | 0.673045 | 29   | 28   | 33   | 28   | 23   | 24   | 1.12 | 0.142023 | 29       | 1.12 | 0.073300 |          |          |          |          |          |
| 247680_s_at | A15g59630 | glycine-rich protein - like DYP2 - like                                          | WD-40 repeat family protein / katanin p         | 20  | 14  | 22   | 21   | 19  | 20   | 0.94 | 0.671017 | 11       | 17       | 17   | 14   | 13   | 12   | 12   | 15   | 14   | 1.12     | 0.149951 | 15   | 1.04     | 0.798614 |          |          |          |          |
| 247681_at   | A15g59640 | serine/threonine-specific protein kinase                                         | CACATA-like transposase family (En/Son)         | 29  | 39  | 39   | 45   | 41  | 41   | 38   | 46       | 0.82     | 0.177511 | 31   | 37   | 40   | 38   | 32   | 29   | 39   | 33       | 36       | 34   | 1.05     | 0.639168 | 33       | 1.09     | 0.495196 |          |
| 247682_at   | A15g59650 | serine/threonine-specific protein kinase                                         | leucine-rich repeat protein kinase, outati      | 78  | 107 | 109  | 85   | 127 | 77   | 98   | 96       | 1.02     | 0.924406 | 67   | 65   | 74   | 79   | 77   | 61   | 108  | 88       | 69       | 82   | 0.83     | 0.232888 | 72       | 0.95     | 0.602972 |          |
| 247683_at   | A15g59660 | serine/threonine-specific protein kinase                                         | leucine-rich repeat protein kinase, outati      | 41  | 52  | 40   | 46   | 73  | 40   | 42   | 0.78     | 0.10382  | 32       | 32   | 40   | 38   | 39   | 35   | 35   | 40   | 38       | 35       | 38   | 0.95     | 0        |          |          |          |          |

|             |           |                                                                                         |      |      |      |      |      |      |      |      |          |          |      |      |      |      |      |      |      |      |      |      |          |          |      |          |          |
|-------------|-----------|-----------------------------------------------------------------------------------------|------|------|------|------|------|------|------|------|----------|----------|------|------|------|------|------|------|------|------|------|------|----------|----------|------|----------|----------|
| 247616_at   | A15f60260 | putative protein various predicted prot expressed protein                               | 36   | 37   | 56   | 60   | 56   | 54   | 43   | 57   | 0.77     | 0.117908 | 33   | 31   | 50   | 36   | 31   | 36   | 45   | 40   | 38   | 38   | 1.01     | 0.922153 | 34   | 1.12     | 0.544563 |
| 247617_at   | A15f60270 | receptor like protein kinase receptor lik lectin protein kinase family protein          | 74   | 98   | 106  | 117  | 125  | 94   | 93   | 112  | 0.83     | 0.217972 | 62   | 53   | 69   | 81   | 76   | 70   | 76   | 78   | 61   | 76   | 0.80     | 0.100004 | 76   | 0.81     | 0.055850 |
| 247618_at   | A15f60280 | receptor like protein kinase receptor lik lectin protein kinase family protein          | 13   | 21   | 19   | 17   | 19   | 18   | 18   | 18   | 0.99     | 0.959405 | 14   | 13   | 16   | 15   | 13   | 14   | 15   | 15   | 14   | 14   | 1.00     | 0.987460 | 14   | 1.03     | 0.739898 |
| 247619_at   | A15f60290 | putative protein                                                                        | 53   | 81   | 88   | 88   | 88   | 80   | 67   | 84   | 0.79     | 0.108768 | 46   | 44   | 54   | 46   | 44   | 44   | 44   | 40   | 48   | 44   | 1.08     | 0.254133 | 47   | 1.04     | 0.074169 |
| 247620_at   | A15f60310 | receptor like protein kinase kinase receptor lik lectin protein kinase, putative        | 45   | 46   | 56   | 61   | 67   | 58   | 50   | 62   | 0.80     | 0.044635 | 40   | 39   | 56   | 46   | 41   | 42   | 50   | 49   | 45   | 45   | 0.99     | 0.948363 | 43   | 1.05     | 0.718235 |
| 247621_at   | A15f60340 | putative protein predicted proteins from maoC-like dehydroatase domain-containi         | 19   | 24   | 24   | 26   | 26   | 23   | 22   | 25   | 0.90     | 0.298485 | 25   | 22   | 27   | 28   | 24   | 24   | 24   | 25   | 23   | 1.08 | 0.495517 | 25       | 0.99 | 0.886634 |          |
| 247622_at   | A15f60350 | putative protein                                                                        | 20   | 14   | 16   | 17   | 16   | 17   | 16   | 17   | 1.02     | 0.871376 | 11   | 15   | 14   | 16   | 17   | 10   | 13   | 14   | 14   | 0.94 | 0.610094 | 14       | 0.93 | 0.665678 |          |
| 247623_at   | A15f60320 | receptor like protein kinase receptor lik lectin protein kinase family protein          | 16   | 16   | 20   | 21   | 21   | 16   | 10   | 21   | 0.83     | 0.055910 | 10   | 13   | 21   | 16   | 15   | 16   | 17   | 15   | 17   | 0.99 | 0.555170 | 15       | 1.00 | 0.772355 |          |
| 247624_at   | A15f60160 | asparil aminopeptidase - like protein / asparil aminopeptidase, putative                | 532  | 636  | 694  | 776  | 773  | 643  | 621  | 731  | 0.85     | 0.164885 | 608  | 605  | 643  | 932  | 697  | 674  | 765  | 778  | 619  | 770  | 0.80     | 0.048428 | 768  | 0.81     | 0.148407 |
| 247625_at   | A15f60200 | zinc finger protein - like doff zinc finse Dof-zinc zinc finger domain-containing t     | 291  | 441  | 393  | 476  | 638  | 447  | 375  | 521  | 0.72     | 0.120077 | 328  | 276  | 335  | 443  | 391  | 343  | 273  | 289  | 313  | 348  | 0.90     | 0.461374 | 393  | 0.80     | 0.081999 |
| 247626_at   | A15f60300 | receptor like protein kinase receptor lik lectin protein kinase family protein          | 124  | 155  | 165  | 173  | 190  | 151  | 148  | 171  | 0.86     | 0.239356 | 109  | 108  | 125  | 128  | 113  | 100  | 123  | 127  | 114  | 118  | 0.97     | 0.624621 | 114  | 1.00     | 0.981236 |
| 247627_at   | A15f60360 | cysteine proteinase AALP identical to A cysteine proteinase, outative / AALP pro        | 496  | 781  | 932  | 974  | 1058 | 786  | 736  | 937  | 0.79     | 0.076621 | 1070 | 1188 | 1084 | 1723 | 1342 | 1328 | 1281 | 1114 | 1401 | 1719 | 0.79     | 0.041651 | 1454 | 0.76     | 0.059769 |
| 247628_at   | A15f60400 | putative protein                                                                        | 181  | 294  | 239  | 242  | 251  | 217  | 238  | 237  | 1.01     | 0.872444 | 94   | 109  | 111  | 191  | 118  | 130  | 167  | 171  | 105  | 155  | 0.87     | 0.034477 | 146  | 0.72     | 0.146326 |
| 247629_at   | A15f60410 | putative protein                                                                        | 77   | 116  | 91   | 121  | 161  | 106  | 95   | 129  | 0.73     | 0.159217 | 31   | 30   | 29   | 35   | 30   | 30   | 47   | 34   | 30   | 35   | 0.86     | 0.278702 | 32   | 0.95     | 0.455475 |
| 247630_at   | A15f60420 | putative protein                                                                        | 244  | 357  | 375  | 371  | 414  | 294  | 325  | 360  | 0.90     | 0.556445 | 223  | 206  | 220  | 283  | 231  | 196  | 252  | 240  | 216  | 240  | 0.90     | 0.259031 | 237  | 0.91     | 0.464639 |
| 247631_at   | A15f60440 | outative MAD5 box protein various ore MAD5-box protein (AGL62)                          | 20   | 35   | 31   | 28   | 25   | 25   | 29   | 26   | 1.10     | 0.591900 | 37   | 40   | 34   | 27   | 22   | 22   | 24   | 28   | 37   | 25   | 1.47     | 0.001535 | 24   | 1.53     | 0.007386 |
| 247632_at   | A15f60460 | putative protein                                                                        | 163  | 203  | 201  | 211  | 203  | 182  | 205  | 0.89 | 0.124056 | 195      | 268  | 241  | 325  | 219  | 208  | 266  | 280  | 235  | 260  | 0.90 | 0.469810 | 251      | 0.94 | 0.729798 |          |
| 247633_at   | A15f60470 | outative zinc finger protein finfer rote zinc finger (C2H2 type) family protein         | 15   | 19   | 23   | 22   | 21   | 22   | 19   | 22   | 0.87     | 0.284113 | 18   | 17   | 18   | 14   | 17   | 15   | 18   | 15   | 18   | 16   | 1.12     | 0.131805 | 15   | 1.17     | 0.051672 |
| 247634_at   | A15f60520 | late embryonic abundant protein - like late embryoenesis abundant protein-re            | 47   | 56   | 60   | 63   | 76   | 55   | 55   | 65   | 0.85     | 0.230405 | 39   | 43   | 52   | 50   | 42   | 38   | 44   | 51   | 45   | 45   | 0.99     | 0.932349 | 43   | 1.03     | 0.803836 |
| 247635_at   | A15f60550 | serine/threonine-protein kinase - like p protein kinase family protein                  | 212  | 236  | 234  | 288  | 333  | 273  | 227  | 298  | 0.76     | 0.022802 | 222  | 184  | 221  | 290  | 237  | 211  | 245  | 232  | 209  | 243  | 0.86     | 0.134283 | 246  | 0.85     | 0.234554 |
| 247636_at   | A15f60570 | putative protein predicted proteins from kelch repeat-containing F-box family pro       | 218  | 249  | 250  | 338  | 336  | 284  | 239  | 319  | 0.75     | 0.017367 | 240  | 221  | 248  | 413  | 334  | 278  | 359  | 325  | 236  | 342  | 0.69     | 0.012642 | 342  | 0.69     | 0.057491 |
| 247637_at   | A15f60600 | outative protein accD protein, Chlamy- t hydroxy-2-methyl-2-(E)-butenyl-4-dich          | 688  | 489  | 477  | 528  | 635  | 488  | 444  | 550  | 0.81     | 0.141928 | 327  | 328  | 370  | 452  | 407  | 331  | 465  | 443  | 342  | 419  | 0.81     | 0.061571 | 396  | 0.86     | 0.224115 |
| 247638_at   | A15f60490 | arabinoalactan protein - like arabino falcid arabinosalactan-protein (FL                | 28   | 33   | 29   | 38   | 44   | 34   | 30   | 38   | 0.79     | 0.048328 | 26   | 25   | 27   | 35   | 27   | 28   | 31   | 25   | 26   | 29   | 0.90     | 0.279168 | 30   | 0.87     | 0.244295 |
| 247639_s_at | A15f60500 | undecarenyl diphosphate synthase u undecarenyl dvydroxoshate synthetase                 | 10   | 10   | 17   | 13   | 14   | 14   | 12   | 13   | 0.93     | 0.688816 | 8    | 9    | 11   | 14   | 9    | 7    | 11   | 10   | 9    | 10   | 0.92     | 0.682112 | 10   | 0.95     | 0.837665 |
| 247640_at   | A15f60610 | putative protein various predicted prot F-box family protein                            | 89   | 100  | 126  | 135  | 154  | 141  | 105  | 143  | 0.73     | 0.035108 | 127  | 90   | 114  | 143  | 137  | 115  | 109  | 114  | 110  | 124  | 0.89     | 0.306029 | 132  | 0.84     | 0.193062 |
| 247641_at   | A15f60620 | imidazolecarboxyl-phosphate synthase SNO glutamine amidotransferase family              | 214  | 283  | 343  | 245  | 324  | 235  | 260  | 268  | 1.04     | 0.811824 | 324  | 414  | 340  | 398  | 332  | 325  | 384  | 358  | 359  | 359  | 1.00     | 0.996521 | 352  | 1.02     | 0.842342 |
| 247642_at   | A15f60590 | putative protein various predicted prot yrdC protein-related                            | 65   | 83   | 91   | 83   | 100  | 81   | 80   | 88   | 0.91     | 0.451934 | 82   | 100  | 98   | 123  | 90   | 94   | 97   | 97   | 94   | 100  | 0.94     | 0.504944 | 102  | 0.92     | 0.511798 |
| 247643_at   | A15f60450 | auxin response factor 4 / supported by auxin-responsive factor (ARF4)                   | 58   | 90   | 64   | 99   | 106  | 95   | 71   | 100  | 0.71     | 0.045329 | 44   | 40   | 51   | 67   | 61   | 54   | 58   | 61   | 45   | 60   | 0.75     | 0.005938 | 60   | 0.74     | 0.035212 |
| 247644_s_at | A15f60390 | translation elongation factor eEF-1 alor elongation factor 1-alpha / EF-1alpha //       | 6652 | 7257 | 7255 | 7907 | 8448 | 7366 | 7055 | 7907 | 0.89     | 0.083561 | 5755 | 5891 | 5935 | 7128 | 6262 | 5988 | 6957 | 6960 | 5861 | 6549 | 0.89     | 0.094387 | 6363 | 0.92     | 0.297646 |
| 247645_at   | A15f60630 | late embryonic abundant protein - like late embryonic abundant protein-re               | 20   | 20   | 20   | 20   | 20   | 20   | 20   | 20   | 0.95     | 0.045010 | 12   | 12   | 18   | 12   | 15   | 17   | 19   | 19   | 19   | 19   | 0.99     | 0.942231 | 19   | 1.02     | 0.926782 |
| 247646_at   | A15f60630 | putative protein predicted protein, Arat expressed protein                              | 84   | 128  | 136  | 117  | 148  | 102  | 116  | 122  | 0.95     | 0.774436 | 92   | 80   | 96   | 134  | 105  | 97   | 85   | 80   | 89   | 0.89 | 0.435890 | 112      | 0.80 | 0.138115 |          |
| 247611_at   | A15f60710 | putative protein predicted proteins zinc finger (C3HC4-type RING finger) fa             | 569  | 670  | 703  | 782  | 1011 | 708  | 647  | 834  | 0.78     | 0.134182 | 397  | 397  | 415  | 691  | 613  | 496  | 606  | 576  | 403  | 597  | 0.68     | 0.003720 | 600  | 0.67     | 0.025770 |
| 247612_at   | A15f60730 | ATPase - like protein ATPase, Solanum anion-transporting ATPase family protein          | 53   | 63   | 62   | 59   | 72   | 65   | 59   | 66   | 0.90     | 0.242830 | 63   | 51   | 60   | 57   | 60   | 59   | 67   | 60   | 58   | 61   | 0.95     | 0.442079 | 59   | 0.99     | 0.827069 |
| 247613_at   | A15f60740 | xABC transporter - like protein breast / ABC transporter family protein                 | 41   | 63   | 62   | 58   | 70   | 56   | 55   | 61   | 0.99     | 0.516056 | 40   | 49   | 53   | 49   | 54   | 62   | 61   | 54   | 62   | 61   | 0.91     | 0.42358  | 67   | 1.00     | 0.989379 |
| 247582_at   | A15f60760 | outative protein various predicted roat 2-phosphoglycerate kinase-related               | 47   | 87   | 68   | 153  | 101  | 70   | 67   | 108  | 0.62     | 0.199921 | 58   | 51   | 59   | 76   | 71   | 64   | 88   | 94   | 56   | 79   | 0.71     | 0.024336 | 70   | 0.80     | 0.029620 |
| 247583_at   | A15f60750 | outative protein predicted protein, Svnv CAAAX amino terminal rotasease family or       | 249  | 372  | 387  | 408  | 397  | 313  | 336  | 373  | 0.90     | 0.522413 | 379  | 370  | 391  | 536  | 402  | 375  | 436  | 414  | 380  | 433  | 0.88     | 0.207373 | 438  | 0.87     | 0.314368 |
| 247584_at   | A15f60760 | 60S ribosomal protein L12 - like 60S R 60S ribosomal protein L12 (RPL12C)               | 2190 | 2649 | 2576 | 2759 | 3042 | 2440 | 2472 | 2747 | 0.90     | 0.288159 | 2197 | 2427 | 2445 | 2989 | 2437 | 2345 | 2262 | 2474 | 2356 | 2501 | 0.94     | 0.449895 | 2590 | 0.91     | 0.340238 |
| 247585_at   | A15f60680 | putative protein predicted proteins from kelch repeat-containing F-box family pr        | 303  | 730  | 561  | 749  | 587  | 587  | 587  | 587  | 0.93     | 0.077460 | 548  | 441  | 509  | 692  | 673  | 669  | 663  | 699  | 699  | 699  | 0.89     | 0.349365 | 664  | 0.92     | 0.926782 |
| 247586_at   | A15f60660 | mipC protein - like (aquaporin) mipC p major intrinsic family protein / MIP family      | 52   | 54   | 68   | 71   | 80   | 70   | 58   | 74   | 0.78     | 0.056567 | 42   | 43   | 55   | 49   | 48   | 52   | 50   | 55   | 47   | 51   | 0.92     | 0.279164 | 50   | 0.94     | 0.521742 |
| 247587_at   | A15f60620 | outative protein predicted proteins, C.c. phosholidololcverol acvttransferase far       | 307  | 518  | 544  | 555  | 698  | 483  | 480  | 579  | 0.83     | 0.292756 | 452  | 515  | 458  | 672  | 575  | 562  | 522  | 498  | 475  | 566  | 0.84     | 0.075511 | 603  | 0.79     | 0.033132 |
| 247588_at   | A15f60640 | protein disulfide isomerase oreucisor - thiorodion family protein                       | 1407 | 1643 | 1499 | 1713 | 1916 | 1438 | 1516 | 1889 | 0.90     | 0.326560 | 1436 | 1205 | 1385 | 1674 | 1572 | 1251 | 1523 | 1462 | 1342 | 1496 | 0.90     | 0.198798 | 1499 | 0.90     | 0.340455 |
| 247589_at   | A15f60690 | REVOLUTA or interfacial fibrousse homeodomain-leucine zipper protein Re                 | 522  | 669  | 598  | 809  | 954  | 844  | 606  | 802  | 0.76     | 0.130806 | 473  | 385  | 509  | 726  | 633  | 568  | 586  | 565  | 456  | 616  | 0.74     | 0.016223 | 642  | 0.71     | 0.033791 |
| 247590_at   | A15f60720 | putative protein predicted proteins, Arat expressed protein                             | 56   | 96   | 96   | 96   | 96   | 80   | 96   | 93   | 0.74     | 0.176580 | 50   | 49   | 48   | 77   | 63   | 52   | 57   | 63   | 57   | 62   | 0.78     | 0.051174 | 62   | 0.79     | 0.11775  |
| 247591_at   | A15f60770 | high-affinity nitrate transporter AAT - high-affinity nitrate transporter, putative     | 44   | 51   | 58   | 52   | 61   | 56   | 51   | 57   | 0.90     | 0.279002 | 42   | 39   | 48   | 41   | 40   | 40   | 52   | 46   | 43   | 44   | 0.98     | 0.790470 | 41   | 1.06     | 0.445482 |
| 247592_at   | A15f60780 | high affinity nitrate transporter protein - high-affinity nitrate transporter, putative | 53   | 70   | 70   | 72   | 80   | 64   | 60   | 72   | 0.83     | 0.165791 | 46   | 41   | 51   | 53   | 43   | 53   | 60   | 55   | 46   | 53   | 0.87     | 0.180201 | 50   | 0.93     | 0.497328 |
| 247593_at   | A15f60790 | ABC transporter homolog PHAT1 - like ABC transporter family protein                     | 1057 | 1398 | 1515 | 1567 | 1692 | 1395 | 1323 | 1551 | 0.85     | 0.232252 | 669  | 570  | 742  | 875  | 748  | 676  | 790  | 796  | 660  | 777  | 0.85     | 0.058671 | 766  | 0.86     | 0.239393 |
| 247594_at   | A15f60800 | outative protein farnesylated protein G heavy-metal-associated domain-contain           | 291  | 376  | 441  | 376  | 459  | 317  | 369  | 363  | 1.02     | 0.356142 | 413  | 436  | 405  | 494  | 435  | 406  | 508  | 494  | 435  | 478  | 0.86     | 0.598614 | 427  | 0.88     | 0.836462 |
| 247595_at   | A15f60820 | ring finger protein - like ring finger protein rnfC (C3HC4-type RING finger) fa         | 230  | 387  | 400  | 416  | 465  | 368  | 352  | 416  | 0.85     | 0.268844 | 294  | 264  |      |      |      |      |      |      |      |      |          |          |      |          |          |

|             |            |                                                                                         |      |      |      |      |      |      |      |      |          |          |      |      |      |      |      |      |      |      |      |      |          |          |          |          |          |          |
|-------------|------------|-----------------------------------------------------------------------------------------|------|------|------|------|------|------|------|------|----------|----------|------|------|------|------|------|------|------|------|------|------|----------|----------|----------|----------|----------|----------|
| 247520_at   | A15f5g1310 | cytochrome c oxidase subunit - like cvy cytochrome c oxidase subunit Vc, putatr         | 568  | 696  | 796  | 858  | 876  | 785  | 687  | 840  | 0.82     | 0.096256 | 746  | 831  | 966  | 1293 | 1016 | 955  | 941  | 893  | 848  | 1019 | 0.83     | 0.155656 | 1088     | 0.78     | 0.120993 |          |
| 247521_at   | A15f5g1450 | putative protein ATP/GTP nucleotide- b 2-phosphoglycerate kinase-related                | 158  | 191  | 219  | 240  | 234  | 196  | 188  | 223  | 0.84     | 0.205204 | 154  | 152  | 163  | 266  | 199  | 188  | 206  | 190  | 156  | 210  | 0.74     | 0.031517 | 218      | 0.72     | 0.064346 |          |
| 247522_at   | A15f5g1340 | putative protein - supported by cDNA: a expressed protein                               | 42   | 47   | 49   | 48   | 51   | 50   | 46   | 50   | 0.93     | 0.193860 | 37   | 46   | 39   | 62   | 38   | 42   | 45   | 41   | 41   | 46   | 0.89     | 0.424215 | 47       | 0.86     | 0.438632 |          |
| 247523_at   | A15f5g1550 | putative protein - supported by cDNA: a cytochrome c oxidase 3-oximease, chloro         | 241  | 64   | 564  | 617  | 539  | 617  | 539  | 617  | 0.93     | 0.193860 | 668  | 633  | 580  | 671  | 671  | 659  | 684  | 670  | 659  | 684  | 0.96     | 0.105091 | 730      | 0.91     | 0.153211 |          |
| 247524_at   | A15f5g1440 | thioredoxin-like 3 - supported by cDNA: thioredoxin family protein                      | 177  | 1245 | 1182 | 791  | 978  | 629  | 1048 | 799  | 1.31     | 0.270425 | 491  | 619  | 529  | 709  | 638  | 550  | 562  | 567  | 546  | 605  | 0.90     | 0.271941 | 633      | 0.86     | 0.220218 |          |
| 247525_at   | A15f5g1380 | pseudo-response regulator 1 - support ABJ3-interacting protein 1 (AIP1)                 | 240  | 295  | 374  | 269  | 422  | 294  | 303  | 328  | 0.92     | 0.705949 | 312  | 286  | 262  | 259  | 252  | 277  | 332  | 331  | 287  | 290  | 0.99     | 0.891650 | 263      | 1.09     | 0.214508 |          |
| 247526_at   | A15f5g1470 | putative protein C2H2 zinc-finger prote zinc finger (C2H2 type) family protein          | 10   | 18   | 17   | 17   | 15   | 18   | 15   | 17   | 0.90     | 0.532096 | 12   | 12   | 16   | 12   | 10   | 12   | 13   | 11   | 13   | 12   | 1.14     | 0.262594 | 11       | 1.17     | 0.299324 |          |
| 247527_at   | A15f5g1470 | leucine-rich repeat-like protein kinase leucine-rich repeat transmembrane pro           | 847  | 160  | 1284 | 807  | 1410 | 756  | 1284 | 807  | 0.60     | 0.081947 | 493  | 413  | 360  | 940  | 687  | 677  | 718  | 689  | 647  | 749  | 0.61     | 0.015871 | 749      | 0.61     | 0.173909 |          |
| 247528_at   | A15f5g1460 | MIM protein - supported by cDNA: a t structural maintenance of chromosomes              | 105  | 130  | 116  | 131  | 130  | 100  | 117  | 120  | 0.97     | 0.797267 | 79   | 64   | 83   | 91   | 81   | 69   | 64   | 81   | 69   | 64   | 0.88     | 0.826579 | 84       | 0.89     | 0.254175 |          |
| 247529_at   | A15f5g1520 | monosaccharide transporter STP3 hexose transporter, putative                            | 72   | 91   | 105  | 123  | 106  | 111  | 89   | 113  | 0.79     | 0.087999 | 46   | 45   | 64   | 67   | 53   | 56   | 80   | 65   | 52   | 64   | 0.81     | 0.164429 | 58       | 0.88     | 0.418499 |          |
| 247530_at   | A15f5g1540 | oligosaccharinase - like protein olv L-asparaginase, putative / L-asparaginase          | 49   | 62   | 75   | 72   | 68   | 61   | 62   | 67   | 0.92     | 0.568527 | 70   | 64   | 64   | 72   | 70   | 66   | 86   | 67   | 66   | 72   | 0.91     | 0.272913 | 69       | 0.95     | 0.283664 |          |
| 247531_at   | A15f5g1550 | putative protein kinase kinase 1, PRP1 protein kinase family protein                    | 15   | 18   | 25   | 29   | 23   | 28   | 19   | 27   | 0.73     | 0.103379 | 11   | 11   | 9    | 17   | 12   | 9    | 12   | 15   | 19   | 12   | 13       | 0.94     | 0.781917 | 11       | 1.15     | 0.571868 |
| 247532_at   | A15f5g1560 | putative protein disease resistance pro protein kinase family protein                   | 37   | 62   | 45   | 56   | 36   | 47   | 46   | 1.03 | 0.855666 | 68       | 59   | 47   | 56   | 45   | 46   | 73   | 65   | 58   | 57   | 1.02 | 0.919477 | 49       | 1.18     | 0.261418 |          |          |
| 247533_at   | A15f5g1570 | putative protein kinase-like transmem protein kinase family protein                     | 49   | 59   | 68   | 99   | 92   | 80   | 58   | 90   | 0.65     | 0.017501 | 70   | 77   | 82   | 129  | 95   | 90   | 93   | 90   | 76   | 100  | 0.77     | 0.066861 | 105      | 0.73     | 0.089790 |          |
| 247534_at   | A15f5g1580 | pyrophosphate-dependent phosphoru phosphotransferase family protein                     | 179  | 281  | 239  | 273  | 351  | 232  | 233  | 286  | 0.82     | 0.312265 | 262  | 225  | 232  | 352  | 336  | 283  | 330  | 282  | 240  | 316  | 0.76     | 0.010957 | 324      | 0.74     | 0.025067 |          |
| 247535_at   | A15f5g1620 | transcriptional activator - like protein D myb family transcription factor              | 36   | 45   | 51   | 44   | 44   | 41   | 44   | 43   | 1.03     | 0.825176 | 40   | 36   | 51   | 31   | 32   | 34   | 55   | 38   | 42   | 38   | 1.12     | 0.525918 | 33       | 1.30     | 0.093916 |          |
| 247536_at   | A15f5g1590 | putative protein disease resistance pro protein kinase family protein                   | 266  | 456  | 732  | 286  | 369  | 251  | 608  | 302  | 2.01     | 0.222584 | 802  | 1080 | 507  | 618  | 621  | 896  | 822  | 796  | 728  | 1.09 | 0.647626 | 641      | 1.24     | 0.403934 |          |          |
| 247537_s_at | A15f5g1730 | ABC transport protein - like ABC trans ABC transporter family protein III ABC tr        | 233  | 236  | 300  | 225  | 198  | 179  | 256  | 201  | 1.28     | 0.096596 | 214  | 212  | 224  | 205  | 166  | 129  | 218  | 200  | 216  | 184  | 1.18     | 0.182510 | 167      | 1.30     | 0.090260 |          |
| 247538_at   | A15f5g1700 | ABC family transporter - like protein At ABC transporter family protein                 | 43   | 39   | 41   | 45   | 46   | 41   | 41   | 44   | 0.93     | 0.221827 | 34   | 39   | 37   | 40   | 30   | 37   | 40   | 34   | 37   | 36   | 1.02     | 0.824947 | 36       | 1.04     | 0.730426 |          |
| 247539_at   | A15f5g1710 | putative protein predicted protein, Arab hypothetical protein                           | 25   | 23   | 30   | 29   | 46   | 26   | 26   | 34   | 0.77     | 0.315768 | 14   | 18   | 17   | 18   | 16   | 18   | 21   | 16   | 16   | 18   | 0.92     | 0.351645 | 17       | 0.94     | 0.450159 |          |
| 247540_at   | A15f5g1690 | ethylene responsive element binding 1, AP2 domain-containing transcription fac          | 214  | 267  | 732  | 286  | 369  | 251  | 608  | 302  | 2.01     | 0.222584 | 802  | 1080 | 507  | 618  | 621  | 896  | 822  | 796  | 728  | 1.09 | 0.647626 | 641      | 1.24     | 0.403934 |          |          |
| 247541_at   | A15f5g1660 | structural protein - like cytochrome c-like glycine-rich protein                        | 130  | 154  | 215  | 195  | 224  | 199  | 166  | 206  | 0.81     | 0.212852 | 85   | 100  | 105  | 140  | 109  | 108  | 138  | 119  | 97   | 123  | 0.77     | 0.042555 | 119      | 0.81     | 0.138600 |          |
| 247542_at   | A15f5g1500 | autohaemoglobin protein - like autohaemoglobin 3 (APG3)                                 | 256  | 379  | 368  | 424  | 466  | 338  | 334  | 409  | 0.82     | 0.238854 | 409  | 422  | 433  | 588  | 496  | 441  | 431  | 406  | 421  | 472  | 0.89     | 0.286621 | 508      | 0.83     | 0.115875 |          |
| 247543_at   | A15f5g1600 | DNA binding protein - like DNA binding ethylene-responsive element-binding fac          | 261  | 210  | 282  | 329  | 370  | 192  | 251  | 297  | 0.85     | 0.489504 | 292  | 517  | 189  | 207  | 162  | 195  | 306  | 288  | 333  | 232  | 1.44     | 0.253778 | 188      | 1.77     | 0.213185 |          |
| 247544_at   | A15f5g1670 | putative protein - supported by full-length expressed protein                           | 258  | 386  | 422  | 368  | 415  | 327  | 358  | 370  | 0.97     | 0.848001 | 372  | 465  | 416  | 660  | 500  | 436  | 504  | 465  | 417  | 513  | 0.81     | 0.134018 | 332      | 0.78     | 0.185270 |          |
| 247545_at   | A15f5g1530 | putative protein rhoGAP, Homo sapien small G protein family protein / RhoGAP            | 287  | 407  | 468  | 398  | 483  | 369  | 387  | 417  | 0.93     | 0.665875 | 451  | 461  | 429  | 595  | 463  | 475  | 503  | 489  | 447  | 511  | 0.88     | 0.073694 | 521      | 0.86     | 0.127942 |          |
| 247546_at   | A15f5g1605 | Expressed protein / supported by full-length expressed protein                          | 37   | 44   | 57   | 40   | 52   | 47   | 46   | 46   | 0.99     | 0.958665 | 26   | 30   | 35   | 34   | 30   | 33   | 30   | 28   | 30   | 31   | 0.97     | 0.722470 | 32       | 0.94     | 0.513643 |          |
| 247512_at   | A15f5g1720 | putative protein predicted protein, Arab expressed protein                              | 47   | 116  | 42   | 92   | 79   | 54   | 68   | 75   | 0.91     | 0.819855 | 23   | 29   | 31   | 99   | 56   | 53   | 48   | 41   | 28   | 59   | 0.47     | 0.061823 | 69       | 0.40     | 0.051954 |          |
| 247513_at   | A15f5g1510 | quinone oxidoreductase - like protein c NAD(P)-dependent oxidoreductase, outat          | 220  | 275  | 253  | 317  | 348  | 257  | 249  | 307  | 0.81     | 0.136243 | 283  | 296  | 307  | 430  | 342  | 339  | 275  | 315  | 295  | 340  | 0.87     | 0.240584 | 370      | 0.80     | 0.071998 |          |
| 247514_at   | A15f5g1540 | putative protein predicted protein, Arab expressed protein                              | 128  | 144  | 155  | 165  | 158  | 144  | 155  | 165  | 0.82     | 0.205848 | 172  | 205  | 186  | 252  | 212  | 205  | 212  | 205  | 212  | 205  | 0.84     | 0.254380 | 244      | 0.81     | 0.174541 |          |
| 247515_at   | A15f5g1740 | ABC family transporter - like protein At ABC transporter family protein                 | 210  | 195  | 270  | 197  | 176  | 179  | 225  | 184  | 1.22     | 0.155916 | 253  | 264  | 288  | 237  | 200  | 150  | 191  | 195  | 268  | 195  | 1.38     | 0.010182 | 196      | 1.37     | 0.056093 |          |
| 247516_at   | A15f5g1750 | germin-like protein - like germin-like or cupin family protein                          | 31   | 36   | 44   | 42   | 45   | 43   | 37   | 43   | 0.84     | 0.159107 | 27   | 29   | 32   | 32   | 32   | 31   | 33   | 30   | 32   | 32   | 0.93     | 0.075326 | 32       | 0.92     | 0.156099 |          |
| 247517_at   | A15f5g1780 | 100 kDa coactivator - like protein 100 l tudor domain-containing protein / nuclea       | 282  | 303  | 303  | 362  | 391  | 332  | 296  | 361  | 0.82     | 0.023530 | 229  | 174  | 229  | 242  | 228  | 181  | 253  | 232  | 211  | 227  | 0.93     | 0.466144 | 217      | 0.97     | 0.817918 |          |
| 247518_at   | A15f5g1800 | putative protein many predicted protein pentatricopeptide (PPR) repeat-containi         | 38   | 54   | 64   | 60   | 69   | 53   | 52   | 61   | 0.86     | 0.390328 | 49   | 43   | 52   | 61   | 52   | 49   | 48   | 55   | 48   | 55   | 0.85     | 0.120930 | 54       | 0.89     | 0.256983 |          |
| 247488_at   | A15f5g1820 | putative protein MIN19, Medicago truon expressed protein                                | 111  | 153  | 298  | 199  | 203  | 154  | 187  | 186  | 1.01     | 0.977925 | 261  | 275  | 272  | 294  | 248  | 226  | 444  | 423  | 269  | 327  | 0.82     | 0.374362 | 256      | 1.05     | 0.545956 |          |
| 247489_at   | A15f5g1830 | carboxyl reductase - like protein induci short-chain dehydrogenase/reductase (s         | 194  | 267  | 237  | 292  | 303  | 241  | 233  | 279  | 0.83     | 0.077198 | 269  | 272  | 273  | 391  | 317  | 293  | 308  | 290  | 271  | 320  | 0.85     | 0.097537 | 334      | 0.81     | 0.104540 |          |
| 247490_at   | A15f5g1850 | LFY floral meristem identity control protol floral meristem identity control protein Li | 28   | 30   | 43   | 39   | 43   | 35   | 34   | 39   | 0.86     | 0.386828 | 26   | 22   | 26   | 28   | 21   | 25   | 35   | 31   | 25   | 28   | 0.89     | 0.389670 | 24       | 1.01     | 0.880434 |          |
| 247491_at   | A15f5g1860 | putative protein predicted protein, Arab expressed protein                              | 214  | 267  | 732  | 286  | 369  | 251  | 608  | 302  | 2.01     | 0.222584 | 802  | 1080 | 507  | 618  | 621  | 896  | 822  | 796  | 728  | 1.09 | 0.647626 | 641      | 1.24     | 0.403934 |          |          |
| 247492_at   | A15f5g1890 | putative protein AP2 domain containin AP2 domain-containing transcription fac           | 35   | 44   | 63   | 50   | 53   | 54   | 48   | 52   | 0.91     | 0.597245 | 46   | 44   | 56   | 35   | 33   | 34   | 36   | 46   | 48   | 37   | 1.31     | 0.032773 | 34       | 1.43     | 0.016724 |          |
| 247493_at   | A15f5g1900 | coincine - like protein coincine 1, Homo sa copine BONZA1 (BON1)                        | 435  | 387  | 687  | 901  | 1153 | 741  | 503  | 932  | 0.54     | 0.047498 | 313  | 276  | 278  | 373  | 322  | 331  | 394  | 381  | 289  | 360  | 0.80     | 0.014614 | 324      | 0.84     | 0.056027 |          |
| 247494_at   | A15f5g1790 | calnexin - like protein calnexin homolog calnexin 1 (CNX1)                              | 1377 | 1482 | 1304 | 1716 | 1672 | 1431 | 1388 | 1606 | 0.86     | 0.099518 | 1387 | 1320 | 1578 | 1914 | 1569 | 1265 | 1547 | 1558 | 1428 | 1571 | 0.91     | 0.374354 | 1583     | 0.90     | 0.488735 |          |
| 247495_at   | A15f5g1760 | putative protein predicted protein, Arab nistitol cytochrome 6-3/5-kinase 2b            | 233  | 284  | 322  | 404  | 455  | 350  | 279  | 403  | 0.69     | 0.035311 | 295  | 280  | 294  | 487  | 429  | 487  | 429  | 487  | 429  | 487  | 0.88     | 0.002952 | 487      | 0.89     | 0.025062 |          |
| 247496_at   | A15f5g1840 | putative protein predicted protein, Arab expressed protein                              | 451  | 611  | 429  | 465  | 611  | 429  | 465  | 611  | 0.90     | 0.181040 | 379  | 362  | 416  | 386  | 424  | 458  | 409  | 442  | 458  | 409  | 0.84     | 0.057606 | 474      | 0.81     | 0.077849 |          |
| 247497_at   | A15f5g1870 | Peter Pan - like protein Peter Pan, Dro bix domain-containing protein                   | 277  | 200  | 219  | 241  | 242  | 202  | 198  | 228  | 0.87     | 0.166401 | 210  | 226  | 250  | 336  | 252  | 247  | 242  | 212  | 229  | 259  | 0.88     | 0.335557 | 278      | 0.82     | 0.187301 |          |
| 247498_at   | A15f5g1810 | peroxisomal Ca-dependent solute carr mitochondrion substrate carrier family pr          | 208  | 212  | 263  | 275  | 308  | 281  | 228  | 288  | 0.97     | 0.043249 | 206  | 215  | 234  | 260  | 246  | 203  | 275  | 282  | 218  | 253  | 0.86     | 0.125064 | 236      | 0.92     | 0.395002 |          |
| 247499_at   | A15f5g1865 | predicted protein                                                                       | 62   | 81   | 74   | 88   | 88   | 73   | 72   | 83   | 0.87     | 0.231596 | 69   | 70   | 74   | 88   | 73   | 72   | 78   | 70   | 71   | 76   | 0.93     | 0.271020 | 78       | 0.91     | 0.283321 |          |
| 247500_at   | A15f5g1910 | putative protein predicted protein, Drosophila expressed protein                        | 67   | 105  | 109  | 109  | 92   | 78   | 102  | 87   | 0.77     | 0.036848 | 64   | 63   | 70   | 66   | 63   | 74   | 66   | 63   | 74   | 66   | 0.73     | 0.053779 | 64       | 0.78     | 0.046305 |          |
| 247501_at   | A15f5g1920 | putative protein predicted proteins, Ara                                                |      |      |      |      |      |      |      |      |          |          |      |      |      |      |      |      |      |      |      |      |          |          |          |          |          |          |

|             |            |                                                                                           |      |      |      |      |      |      |      |      |          |          |      |      |      |      |      |      |      |      |      |      |          |          |      |          |          |
|-------------|------------|-------------------------------------------------------------------------------------------|------|------|------|------|------|------|------|------|----------|----------|------|------|------|------|------|------|------|------|------|------|----------|----------|------|----------|----------|
| 247426_at   | A15fg62570 | putative protein contains similarity to ca calmodulin-binding protein                     | 254  | 268  | 369  | 451  | 546  | 386  | 297  | 461  | 0.64     | 0.049593 | 233  | 219  | 235  | 301  | 254  | 303  | 270  | 229  | 270  | 0.85 | 0.103714 | 258      | 0.89 | 0.295288 |          |
| 247427_at   | A15fg62580 | putative protein similar to unknown pr expressed protein                                  | 220  | 282  | 251  | 353  | 405  | 317  | 251  | 358  | 0.70     | 0.026337 | 226  | 197  | 243  | 317  | 254  | 235  | 247  | 235  | 222  | 228  | 0.86     | 0.166099 | 269  | 0.82     | 0.169799 |
| 247428_at   | A15fg62590 | unknown protein                                                                           | 367  | 371  | 371  | 393  | 427  | 387  | 370  | 402  | 0.92     | 0.056391 | 362  | 292  | 379  | 400  | 388  | 301  | 420  | 387  | 344  | 379  | 0.91     | 0.338849 | 363  | 0.95     | 0.672998 |
| 247429_at   | A15fg62600 | putative protein strong similarity to unk galactose-4-epimerase family protein            | 340  | 381  | 380  | 395  | 429  | 313  | 327  | 380  | 0.82     | 0.319386 | 281  | 237  | 276  | 305  | 310  | 287  | 310  | 287  | 281  | 310  | 0.87     | 0.190361 | 367  | 0.91     | 0.269132 |
| 247430_at   | A15fg62610 | unknown protein contains similarity to DI basic helix-loop-helix (bHLH) family prot       | 369  | 494  | 521  | 558  | 613  | 481  | 461  | 551  | 0.84     | 0.212341 | 461  | 470  | 476  | 751  | 664  | 558  | 616  | 584  | 469  | 634  | 0.74     | 0.010951 | 658  | 0.71     | 0.028045 |
| 247431_at   | A15fg62520 | putative protein similar to unknown prt expressed protein                                 | 106  | 94   | 176  | 190  | 177  | 194  | 125  | 187  | 0.67     | 0.076511 | 59   | 63   | 76   | 76   | 53   | 86   | 71   | 66   | 68   | 68   | 0.97     | 0.841816 | 61   | 1.09     | 0.600915 |
| 247432_at   | A15fg62500 | microtubule-associated protein EB1-like microtubule-associated EB1 family prote           | 128  | 163  | 143  | 165  | 201  | 157  | 145  | 172  | 0.83     | 0.153079 | 101  | 131  | 127  | 151  | 119  | 108  | 99   | 105  | 120  | 116  | 1.03     | 0.813053 | 125  | 0.95     | 0.738232 |
| 247433_at   | A15fg62510 | ubiquitin-conjugating enzyme 3 (UBC3)                                                     | 667  | 749  | 650  | 690  | 781  | 607  | 654  | 787  | 0.85     | 0.165307 | 662  | 552  | 662  | 1051 | 848  | 737  | 642  | 667  | 663  | 712  | 0.92     | 0.029022 | 878  | 0.83     | 0.154584 |
| 247434_at   | A15fg62575 | Expressed protein ; supported by full-length expressed protein                            | 328  | 458  | 543  | 508  | 595  | 527  | 443  | 543  | 0.81     | 0.213013 | 509  | 624  | 552  | 641  | 583  | 537  | 585  | 571  | 562  | 583  | 0.96     | 0.537555 | 587  | 0.96     | 0.605504 |
| 247435_at   | A15fg62480 | glutathione S-transferase-like protein ; glutathione S-transferase, putative              | 38   | 40   | 59   | 54   | 47   | 49   | 46   | 50   | 0.92     | 0.509911 | 32   | 31   | 47   | 31   | 28   | 30   | 40   | 36   | 37   | 33   | 1.11     | 0.468956 | 30   | 1.23     | 0.272143 |
| 247436_at   | A15fg62530 | dehydrogenase ; supported by cDNA: delta-1-oxvoirone-5-carboxylate dehydrot               | 305  | 433  | 423  | 408  | 564  | 411  | 387  | 461  | 0.84     | 0.325454 | 354  | 316  | 343  | 447  | 420  | 362  | 485  | 366  | 338  | 416  | 0.81     | 0.052522 | 410  | 0.82     | 0.059744 |
| 247437_at   | A15fg62490 | ARHVA22-like protein ; supported by cDNA-responsive protein (HVAZ2b)                      | 41   | 50   | 77   | 485  | 172  | 104  | 56   | 254  | 0.22     | 0.168359 | 36   | 32   | 56   | 34   | 42   | 45   | 42   | 41   | 36   | 34   | 0.82     | 0.012807 | 43   | 0.78     | 0.005203 |
| 247438_at   | A15fg62450 | unknown protein ; supported by cDNA: zinc finger (CCHC-type RING finger) fa               | 172  | 225  | 237  | 245  | 271  | 206  | 212  | 241  | 0.88     | 0.348344 | 173  | 208  | 208  | 284  | 212  | 205  | 212  | 212  | 196  | 223  | 0.88     | 0.275735 | 234  | 0.84     | 0.249699 |
| 247439_at   | A15fg62670 | plasma membrane proton ATPase-like ATPase, plasma membrane-type, putati                   | 699  | 973  | 1071 | 874  | 1045 | 776  | 915  | 899  | 1.02     | 0.912728 | 626  | 664  | 747  | 909  | 820  | 670  | 846  | 818  | 679  | 813  | 0.84     | 0.062396 | 900  | 0.85     | 0.198452 |
| 247440_at   | A15fg62680 | peridine transporter                                                                      | 32   | 43   | 50   | 87   | 83   | 68   | 41   | 79   | 0.52     | 0.008342 | 44   | 36   | 59   | 115  | 89   | 84   | 122  | 110  | 46   | 104  | 0.45     | 0.001891 | 96   | 0.48     | 0.012584 |
| 247441_at   | A15fg62710 | receptor - like protein kinase - like prots integrate-rich repeat family protein / protei | 201  | 283  | 229  | 295  | 338  | 263  | 238  | 289  | 0.80     | 0.133651 | 175  | 145  | 184  | 248  | 192  | 176  | 214  | 197  | 168  | 205  | 0.82     | 0.088636 | 205  | 0.82     | 0.204828 |
| 247442_s_at | A15fg62690 | tubulin beta-2beta-3 chain (tub2) tubulin beta-2beta-3 chain (TUB2) // ful                | 2612 | 2959 | 3042 | 9448 | 3539 | 3028 | 2871 | 3339 | 0.86     | 0.085150 | 2358 | 2424 | 2769 | 3230 | 2845 | 2434 | 2873 | 2969 | 2527 | 2870 | 0.88     | 0.134580 | 2836 | 0.89     | 0.312125 |
| 247443_at   | A15fg62720 | putative protein predicted proteins. Arai teacup-membrane HPP family protein              | 127  | 147  | 162  | 136  | 195  | 120  | 145  | 150  | 0.97     | 0.854271 | 384  | 422  | 315  | 371  | 268  | 366  | 457  | 439  | 373  | 378  | 0.99     | 0.924033 | 332  | 1.13     | 0.406161 |
| 247444_at   | A15fg62630 | putative protein strong similarity to unk expressed protein                               | 39   | 47   | 48   | 37   | 43   | 42   | 44   | 41   | 1.08     | 0.368843 | 32   | 37   | 40   | 33   | 34   | 34   | 49   | 37   | 36   | 37   | 0.97     | 0.799699 | 34   | 1.07     | 0.353886 |
| 247445_at   | A15fg62640 | putative protein similar to unknown prd protine-rich family protein                       | 300  | 385  | 331  | 399  | 424  | 326  | 339  | 383  | 0.88     | 0.315048 | 351  | 322  | 325  | 463  | 393  | 359  | 450  | 442  | 333  | 421  | 0.79     | 0.016841 | 405  | 0.82     | 0.087310 |
| 247446_at   | A15fg62650 | unknown protein ; supported by cDNA: expressed protein                                    | 158  | 225  | 235  | 258  | 300  | 228  | 206  | 265  | 0.78     | 0.135876 | 182  | 164  | 189  | 251  | 213  | 201  | 220  | 178  | 222  | 0.80 | 0.011697 | 222      | 0.80 | 0.061011 |          |
| 247447_at   | A15fg62730 | nitrate transporter NTL1 - like protein r proton-dependent olocoecide transport           | 33   | 35   | 38   | 107  | 89   | 77   | 35   | 91   | 0.39     | 0.003153 | 41   | 39   | 54   | 107  | 87   | 82   | 93   | 88   | 45   | 91   | 0.49     | 0.000486 | 92   | 0.49     | 0.006806 |
| 247448_at   | A15fg62770 | putative protein predicted proteins. Arai expressed protein                               | 224  | 275  | 308  | 476  | 490  | 354  | 269  | 440  | 0.61     | 0.026519 | 218  | 245  | 239  | 418  | 273  | 289  | 319  | 303  | 234  | 320  | 0.73     | 0.046773 | 327  | 0.72     | 0.117429 |
| 247421_at   | A15fg62800 | SIAM1 - like protein SIAMH1. Brassica n seven in absentia (SINA) family protein           | 54   | 57   | 66   | 64   | 56   | 53   | 59   | 58   | 1.02     | 0.829255 | 42   | 45   | 46   | 41   | 43   | 32   | 38   | 43   | 44   | 39   | 1.13     | 0.112655 | 39   | 1.15     | 0.159802 |
| 247422_at   | A15fg62810 | putative protein                                                                          | 241  | 325  | 271  | 317  | 363  | 251  | 279  | 310  | 0.90     | 0.485300 | 311  | 261  | 290  | 407  | 359  | 300  | 327  | 316  | 288  | 342  | 0.84     | 0.095248 | 355  | 0.81     | 0.116327 |
| 247423_at   | A15fg62830 | putative protein predicted proteins. Arai F-box family protein-related                    | 35   | 34   | 43   | 53   | 40   | 39   | 45   | 0.87 | 0.381906 | 36       | 34   | 44   | 45   | 0.85 | 0.38 | 39   | 47   | 43   | 38   | 41   | 0.92     | 0.473929 | 39   | 0.88     | 0.887075 |
| 247424_at   | A15fg62850 | LIM7 - like protein LIM7, Liliun lonifolii nodulin MN3 family protein                     | 30   | 25   | 22   | 23   | 27   | 21   | 26   | 24   | 1.09     | 0.508582 | 25   | 21   | 29   | 26   | 22   | 21   | 34   | 23   | 25   | 23   | 0.99     | 0.929523 | 23   | 1.09     | 0.513193 |
| 247394_at   | A15fg62860 | putative protein predicted proteins. Arai F-box family protein-related                    | 48   | 53   | 78   | 59   | 68   | 54   | 60   | 60   | 1.00     | 0.987804 | 53   | 61   | 55   | 80   | 61   | 49   | 65   | 61   | 56   | 63   | 0.89     | 0.360090 | 63   | 0.89     | 0.501155 |
| 247395_at   | A15fg62910 | putative protein predicted proteins. Arai expressed protein                               | 222  | 245  | 256  | 223  | 246  | 203  | 221  | 224  | 0.99     | 0.925107 | 200  | 221  | 191  | 276  | 210  | 189  | 262  | 249  | 204  | 237  | 0.86     | 0.153295 | 225  | 0.91     | 0.490331 |
| 247396_at   | A15fg62930 | putative protein predicted proteins. Ch CD35, non-follicle-hydrolase family prot          | 440  | 463  | 559  | 571  | 453  | 464  | 510  | 554  | 0.92     | 0.502119 | 462  | 722  | 583  | 817  | 619  | 609  | 602  | 591  | 622  | 616  | 0.96     | 0.732292 | 608  | 0.92     | 0.536895 |
| 247397_at   | A15fg62940 | Dof zinc finger protein - like Dof zinc fr Dof-type zinc finger domain-containing c       | 169  | 251  | 435  | 295  | 311  | 386  | 305  | 331  | 0.92     | 0.736686 | 92   | 91   | 162  | 151  | 110  | 112  | 162  | 158  | 115  | 139  | 0.83     | 0.324297 | 125  | 0.92     | 0.744373 |
| 247398_at   | A15fg62950 | putative protein predicted protein. Arai expressed protein // expressed protei            | 195  | 245  | 270  | 265  | 300  | 217  | 237  | 261  | 0.91     | 0.504434 | 237  | 221  | 242  | 351  | 274  | 271  | 269  | 258  | 233  | 285  | 0.82     | 0.064537 | 299  | 0.78     | 0.070572 |
| 247399_at   | A15fg62960 | putative protein similar to unknown prd expressed protein                                 | 90   | 104  | 116  | 153  | 171  | 139  | 103  | 154  | 0.87     | 0.013822 | 111  | 108  | 125  | 194  | 152  | 133  | 147  | 149  | 115  | 155  | 0.74     | 0.028648 | 160  | 0.72     | 0.073573 |
| 247400_at   | A15fg62970 | putative protein ; supported by full-length phosphoglycolate:halloshochholcarate ;        | 78   | 110  | 97   | 109  | 132  | 106  | 95   | 118  | 0.82     | 0.109710 | 117  | 124  | 130  | 159  | 138  | 137  | 150  | 142  | 124  | 151  | 0.82     | 0.084585 | 155  | 0.80     | 0.154153 |
| 247401_at   | A15fg62790 | 1-deoxo-D-xylulose 5-phosphate reduct ; 1-deoxo-D-xylulose 5-phosphate reduct;            | 238  | 335  | 340  | 403  | 424  | 354  | 304  | 393  | 0.77     | 0.084572 | 358  | 423  | 408  | 602  | 479  | 411  | 461  | 461  | 396  | 483  | 0.82     | 0.101974 | 497  | 0.80     | 0.162880 |
| 247402_at   | A15fg62750 | putative protein predicted proteins. Arai expressed protein                               | 32   | 34   | 37   | 32   | 37   | 18   | 34   | 29   | 1.20     | 0.394024 | 68   | 45   | 46   | 52   | 50   | 44   | 39   | 43   | 53   | 46   | 1.15     | 0.300535 | 49   | 1.08     | 0.631180 |
| 247403_at   | A15fg62740 | putative protein hypersensitive-induc band 7 family protein                               | 3011 | 3389 | 3732 | 3547 | 3942 | 3103 | 3378 | 3531 | 0.96     | 0.856437 | 3993 | 4219 | 3911 | 4783 | 4306 | 3799 | 4466 | 4499 | 4041 | 4371 | 0.92     | 0.195730 | 4296 | 0.94     | 0.440891 |
| 247404_at   | A15fg62890 | permease 1 - like protein permease 1 ; permease, putative                                 | 505  | 556  | 745  | 627  | 666  | 596  | 596  | 746  | 0.80     | 0.089019 | 391  | 380  | 424  | 650  | 547  | 451  | 512  | 495  | 398  | 533  | 0.75     | 0.030520 | 553  | 0.72     | 0.070766 |
| 247405_at   | A15fg62880 | Arae10P ; supported by cDNA: alpha 3702i Rac-like GTP-binding protein (ARAC10)            | 269  | 347  | 381  | 420  | 433  | 367  | 332  | 407  | 0.82     | 0.128414 | 283  | 331  | 333  | 569  | 399  | 393  | 358  | 335  | 316  | 411  | 0.77     | 0.141037 | 545  | 0.74     | 0.081920 |
| 247406_at   | A15fg62920 | response regulator 6 (ARR6) ; support two-component reponsive regulator / re              | 36   | 40   | 44   | 62   | 64   | 54   | 40   | 66   | 0.66     | 0.007005 | 25   | 31   | 27   | 107  | 70   | 67   | 58   | 52   | 28   | 71   | 0.39     | 0.015943 | 82   | 0.34     | 0.014772 |
| 247407_at   | A15fg62900 | putative protein predicted proteins. Arai expressed protein                               | 97   | 132  | 141  | 106  | 149  | 105  | 123  | 120  | 1.03     | 0.877960 | 91   | 114  | 95   | 114  | 91   | 100  | 106  | 108  | 100  | 104  | 0.96     | 0.613883 | 102  | 0.98     | 0.869016 |
| 247408_at   | A15fg62780 | ZAP - like protein nuclear protein ZAP, nuclear protein ZAP-related                       | 47   | 43   | 47   | 48   | 57   | 50   | 55   | 46   | 0.87     | 0.003575 | 34   | 34   | 47   | 48   | 30   | 36   | 49   | 36   | 35   | 43   | 0.82     | 0.226240 | 43   | 0.81     | 0.308682 |
| 247409_at   | A15fg62800 | glyoxylate reductase-like protein ; glyoxylate reductase-like protein                     | 138  | 187  | 230  | 200  | 196  | 180  | 184  | 192  | 0.96     | 0.791913 | 154  | 187  | 186  | 255  | 187  | 177  | 182  | 195  | 180  | 176  | 0.89     | 0.338785 | 204  | 0.86     | 0.357322 |
| 247410_at   | A15fg62990 | putative protein similar to unknown prd hypothetical protein                              | 21   | 29   | 32   | 37   | 46   | 35   | 27   | 39   | 0.70     | 0.060554 | 22   | 24   | 25   | 26   | 25   | 24   | 20   | 24   | 20   | 24   | 1.00     | 0.979624 | 25   | 0.95     | 0.288330 |
| 247411_at   | A15fg63000 | putative protein contains similarity to u expressed protein                               | 259  | 340  | 353  | 365  | 409  | 355  | 317  | 376  | 0.84     | 0.153838 | 333  | 383  | 346  | 475  | 398  | 350  | 419  | 404  | 354  | 409  | 0.86     | 0.103637 | 400  | 0.87     | 0.242595 |
| 247412_at   | A15fg63010 | unknown protein                                                                           | 131  | 147  | 171  | 164  | 186  | 151  | 150  | 167  | 0.90     | 0.325494 | 129  | 145  | 151  | 209  | 175  | 150  | 167  | 168  | 142  | 174  | 0.81     | 0.058345 | 178  | 0.80     | 0.117500 |
| 247413_at   | A15fg63020 | NSBL-R DR disease resistance protein                                                      | 16   | 18   | 20   | 27   | 23   | 17   | 15   | 12   | 0.80     | 0.034788 | 16   | 15   | 21   | 16   | 15   | 12   | 16   | 15   | 12   | 16   | 1.07     | 0.650201 | 16   | 1.20     | 0.274860 |
| 247414_at   |            |                                                                                           |      |      |      |      |      |      |      |      |          |          |      |      |      |      |      |      |      |      |      |      |          |          |      |          |          |

|           |            |                                                                                                                                           |                                                                                                                                           |     |      |      |      |      |      |          |          |          |          |     |      |      |      |      |      |      |      |      |          |          |          |          |          |          |
|-----------|------------|-------------------------------------------------------------------------------------------------------------------------------------------|-------------------------------------------------------------------------------------------------------------------------------------------|-----|------|------|------|------|------|----------|----------|----------|----------|-----|------|------|------|------|------|------|------|------|----------|----------|----------|----------|----------|----------|
| 247338_at | A15fg63680 | pyruvate kinase                                                                                                                           | pyruvate kinase, putative                                                                                                                 | 264 | 335  | 315  | 429  | 493  | 367  | 305      | 430      | 0.71     | 0.041296 | 340 | 304  | 307  | 479  | 410  | 370  | 370  | 338  | 317  | 394      | 0.81     | 0.061260 | 420      | 0.76     | 0.037787 |
| 247339_at | A15fg63690 | unknown protein                                                                                                                           | hypothetical protein                                                                                                                      | 47  | 66   | 80   | 65   | 77   | 65   | 64       | 69       | 0.93     | 0.046775 | 44  | 57   | 52   | 55   | 56   | 48   | 64   | 57   | 51   | 56       | 0.91     | 0.273460 | 53       | 0.96     | 0.639696 |
| 247340_at | A15fg63700 | unknown protein                                                                                                                           | zinc finger (C3HC4 type RING finger) fa                                                                                                   | 338 | 477  | 558  | 541  | 582  | 462  | 458      | 528      | 0.87     | 0.388737 | 308 | 360  | 443  | 604  | 462  | 307  | 470  | 474  | 370  | 463      | 0.80     | 0.225433 | 458      | 0.81     | 0.404623 |
| 247341_at | A15fg63720 | unknown protein                                                                                                                           | hypothetical protein                                                                                                                      | 42  | 56   | 68   | 51   | 68   | 42   | 40       | 55       | 0.87     | 0.457352 | 34  | 32   | 34   | 37   | 41   | 33   | 31   | 27   | 33   | 31       | 0.82     | 0.261927 | 42       | 0.82     | 0.404623 |
| 247342_at | A15fg63730 | ARI-like RING zinc finger protein-like                                                                                                    | IBR domain-containing protein                                                                                                             | 39  | 46   | 57   | 55   | 51   | 50   | 48       | 52       | 0.92     | 0.470084 | 40  | 40   | 46   | 45   | 37   | 37   | 48   | 39   | 42   | 41       | 1.02     | 0.836466 | 40       | 1.05     | 0.546088 |
| 247343_at | A15fg63740 | unknown protein                                                                                                                           | zinc finger protein-related                                                                                                               | 12  | 10   | 15   | 10   | 15   | 12   | 15       | 12       | 0.85     | 0.449106 | 9   | 7    | 13   | 9    | 14   | 10   | 9    | 10   | 10   | 0.98     | 0.866791 | 11       | 0.93     | 0.771326 |          |
| 247344_at | A15fg63750 | ARI-like RING zinc finger protein-like                                                                                                    | IBR domain-containing protein                                                                                                             | 59  | 74   | 100  | 93   | 89   | 77   | 78       | 86       | 0.90     | 0.527480 | 55  | 56   | 68   | 83   | 69   | 63   | 80   | 65   | 60   | 72       | 0.83     | 0.098711 | 72       | 0.83     | 0.179722 |
| 247345_at | A15fg63760 | putative protein contains similarity to A15fg63760                                                                                        | putative protein contains similarity to A15fg63760                                                                                        | 140 | 160  | 170  | 211  | 171  | 158  | 164      | 184      | 0.86     | 0.186314 | 169 | 172  | 164  | 192  | 178  | 179  | 212  | 178  | 164  | 255      | 0.79     | 0.040928 | 268      | 0.79     | 0.144022 |
| 247346_at | A15fg63770 | diacylglycerol kinase                                                                                                                     | diacylglycerol kinase, putative                                                                                                           | 111 | 138  | 132  | 156  | 199  | 134  | 127      | 163      | 0.78     | 0.156977 | 74  | 69   | 70   | 93   | 83   | 70   | 78   | 82   | 71   | 81       | 0.88     | 0.100124 | 82       | 0.87     | 0.188797 |
| 247347_at | A15fg63780 | outative protein similar to unknown drot C3HC4-type RING finger) fa                                                                       | beta-galactosidase (emb CABA6746.1) beta-galactosidase, outative / lactase, or outative protein similar to unknown drot expressed protein | 236 | 287  | 297  | 369  | 389  | 295  | 273      | 351      | 0.78     | 0.085691 | 282 | 257  | 261  | 375  | 338  | 258  | 342  | 335  | 267  | 330      | 0.81     | 0.054811 | 324      | 0.82     | 0.184391 |
| 247348_at | A15fg63810 | beta-galactosidase (emb CABA6746.1) beta-galactosidase, outative / lactase, or outative protein similar to unknown drot expressed protein | 268                                                                                                                                       | 346 | 322  | 314  | 485  | 303  | 312  | 367      | 0.85     | 0.429358 | 212      | 175 | 197  | 222  | 208  | 247  | 244  | 195  | 225  | 38   | 0.87     | 0.074182 | 212      | 0.92     | 0.232412 |          |
| 247349_at | A15fg63820 | flavonol synthase - supported by full-length flavonol synthase, putative                                                                  | 35                                                                                                                                        | 41  | 45   | 47   | 53   | 50   | 40   | 50       | 81       | 0.84     | 0.046861 | 33  | 39   | 39   | 43   | 34   | 36   | 43   | 42   | 37   | 40       | 0.93     | 0.331455 | 38       | 0.97     | 0.735882 |
| 247350_at | A15fg63830 | unknown protein                                                                                                                           | zinc finger (HT type) family protein                                                                                                      | 304 | 365  | 518  | 428  | 469  | 421  | 406      | 446      | 0.67     | 0.057285 | 290 | 229  | 299  | 385  | 276  | 270  | 369  | 363  | 273  | 303      | 0.82     | 0.155458 | 311      | 0.88     | 0.430796 |
| 247351_at | A15fg63790 | putative protein contains similarity to Nu no apical meristem (NAM) family protein                                                        | 160                                                                                                                                       | 165 | 216  | 313  | 290  | 209  | 180  | 271      | 0.67     | 0.066489 | 163      | 190 | 169  | 211  | 157  | 129  | 203  | 195  | 174  | 179  | 0.97     | 0.831381 | 166      | 1.05     | 0.757221 |          |
| 247352_at | A15fg63650 | serine/threonine-protein kinase - supported by serine/threonine protein kinase, putative                                                  | 195                                                                                                                                       | 334 | 236  | 364  | 391  | 261  | 255  | 338      | 0.75     | 0.217854 | 298      | 290 | 313  | 513  | 369  | 350  | 305  | 303  | 300  | 368  | 0.82     | 0.234718 | 411      | 0.73     | 0.100671 |          |
| 247353_at | A15fg63620 | alcohol dehydrogenase-like protein - su oxidoreductase, zinc-binding oxidoreductase                                                       | 413                                                                                                                                       | 532 | 569  | 517  | 593  | 417  | 505  | 509      | 0.89     | 0.954433 | 381      | 386 | 364  | 450  | 393  | 382  | 380  | 385  | 377  | 398  | 0.95     | 0.300239 | 409      | 0.92     | 0.230751 |          |
| 247354_at | A15fg63670 | unknown protein                                                                                                                           | supported by full-length transcription initiation protein-related                                                                         | 636 | 906  | 993  | 1011 | 1129 | 961  | 845      | 1034     | 0.82     | 0.186420 | 881 | 1166 | 1115 | 1567 | 1127 | 1127 | 1106 | 1088 | 1054 | 1203     | 0.88     | 0.320922 | 1274     | 0.83     | 0.288254 |
| 247356_at | A15fg63800 | beta-galactosidase (emb CABA6742.1) glycosyl hydrolase family 35 protein                                                                  | 171                                                                                                                                       | 195 | 261  | 159  | 192  | 134  | 209  | 162      | 129      | 0.209732 | 69       | 86  | 67   | 131  | 117  | 96   | 224  | 185  | 74   | 151  | 0.49     | 0.051585 | 115      | 0.64     | 0.025471 |          |
| 247357_at | A15fg63710 | receptor-like protein kinase - supported by leucine-rich repeat transmembrane prot                                                        | 54                                                                                                                                        | 70  | 98   | 83   | 181  | 100  | 74   | 121      | 0.61     | 0.226732 | 37       | 36  | 39   | 66   | 48   | 42   | 66   | 52   | 37   | 55   | 0.67     | 0.033608 | 52       | 0.71     | 0.108538 |          |
| 247296_at | A15fg63840 | glucosylase II alpha subunit                                                                                                              | alpha-glucosylase, putative                                                                                                               | 954 | 1097 | 1121 | 1329 | 1486 | 1144 | 1057     | 1319     | 0.80     | 0.070906 | 892 | 789  | 1068 | 1220 | 1079 | 943  | 972  | 988  | 916  | 1020     | 0.91     | 0.350039 | 1047     | 0.88     | 0.394215 |
| 247299_at | A15fg63900 | outative protein contains similarity to PI PHD finger family protein                                                                      | 50                                                                                                                                        | 58  | 79   | 70   | 75   | 68   | 62   | 71       | 0.88     | 0.397788 | 35       | 35  | 47   | 48   | 40   | 25   | 41   | 48   | 39   | 40   | 0.97     | 0.836730 | 38       | 1.04     | 0.854301 |          |
| 247300_at | A15fg63910 | unknown protein                                                                                                                           | expressed protein                                                                                                                         | 163 | 203  | 230  | 220  | 240  | 182  | 199      | 214      | 0.93     | 0.580919 | 225 | 212  | 216  | 242  | 249  | 225  | 247  | 244  | 218  | 241      | 0.90     | 0.010784 | 239      | 0.91     | 0.065334 |
| 247301_at | A15fg63920 | DNA topoisomerase III                                                                                                                     | DNA topoisomerase III alpha, putative                                                                                                     | 213 | 260  | 230  | 266  | 312  | 245  | 234      | 274      | 0.85     | 0.166644 | 223 | 191  | 227  | 248  | 217  | 184  | 239  | 213  | 214  | 220      | 0.97     | 0.720298 | 216      | 0.99     | 0.915285 |
| 247302_at | A15fg63880 | unknown protein - supported by full-length SNF7 family protein                                                                            | 158                                                                                                                                       | 196 | 195  | 203  | 249  | 166  | 183  | 206      | 0.89     | 0.436973 | 223      | 211 | 204  | 280  | 210  | 209  | 221  | 207  | 213  | 221  | 0.96     | 0.544515 | 226      | 0.94     | 0.479102 |          |
| 247303_at | A15fg63890 | histidinol dehydrogenase - supported by histidinol dehydrogenase, putative / HDH                                                          | 212                                                                                                                                       | 264 | 272  | 085  | 332  | 251  | 249  | 289      | 0.86     | 0.254851 | 244      | 250 | 252  | 316  | 265  | 231  | 307  | 285  | 249  | 281  | 0.89     | 0.217454 | 271      | 0.92     | 0.432295 |          |
| 247304_at | A15fg63850 | amino acid transporter AAP4 (pir)S11 amino acid transporter 4, putative (AAP4                                                             | 28                                                                                                                                        | 48  | 43   | 88   | 81   | 51   | 40   | 74       | 0.54     | 0.060878 | 49       | 44  | 56   | 120  | 96   | 89   | 108  | 99   | 50   | 102  | 0.49     | 0.000479 | 102      | 0.49     | 0.009647 |          |
| 247305_at | A15fg63905 | Expressed protein - supported by full-length expressed protein                                                                            | 114                                                                                                                                       | 151 | 176  | 151  | 142  | 147  | 158  | 0.93     | 0.643242 | 157      | 177      | 151 | 217  | 161  | 160  | 163  | 166  | 162  | 173  | 0.93 | 0.482305 | 180      | 0.90     | 0.431451 |          |          |
| 247306_at | A15fg63870 | ser/thr protein phosphatase catalytic su serine/threonine protein phosphatase (P                                                          | 133                                                                                                                                       | 159 | 166  | 212  | 214  | 178  | 153  | 202      | 0.76     | 0.033747 | 161      | 170 | 170  | 240  | 191  | 182  | 178  | 162  | 167  | 191  | 0.88     | 0.234533 | 204      | 0.82     | 0.112655 |          |
| 247307_at | A15fg63860 | UVB-resistance protein UVBR (rat)A4                                                                                                       | 363                                                                                                                                       | 534 | 542  | 534  | 633  | 475  | 549  | 543      | 0.87     | 0.308687 | 514      | 526 | 528  | 612  | 534  | 518  | 607  | 624  | 518  | 615  | 0.83     | 0.072788 | 612      | 0.89     | 0.465160 |          |
| 247308_at | A15fg63930 | receptor-like protein kinase - su leucine-rich repeat transmembrane protein                                                               | 87                                                                                                                                        | 122 | 139  | 125  | 176  | 123  | 116  | 142      | 0.82     | 0.333233 | 100      | 88  | 104  | 128  | 96   | 98   | 113  | 113  | 97   | 110  | 0.88     | 0.184180 | 107      | 0.90     | 0.410622 |          |
| 247309_at | A15fg63940 | putative protein contains similarity to pr protein kinase family protein                                                                  | 319                                                                                                                                       | 425 | 432  | 528  | 588  | 444  | 392  | 520      | 0.75     | 0.082184 | 373      | 288 | 343  | 447  | 382  | 317  | 380  | 373  | 311  | 380  | 0.82     | 0.075474 | 382      | 0.81     | 0.179538 |          |
| 247310_at | A15fg63950 | putative protein contains similarity to SF SNF2 domain-containing protein / helica                                                        | 173                                                                                                                                       | 238 | 206  | 226  | 281  | 217  | 205  | 241      | 0.85     | 0.263351 | 173      | 123 | 156  | 195  | 170  | 136  | 251  | 200  | 150  | 190  | 0.79     | 0.193782 | 167      | 0.90     | 0.501776 |          |
| 247311_at | A15fg63960 | DNA polymerase III catalytic subunit - DNA-directed DNA polymerase delta cat                                                              | 230                                                                                                                                       | 285 | 269  | 330  | 330  | 286  | 290  | 280      | 0.87     | 0.252205 | 182      | 156 | 221  | 241  | 213  | 169  | 217  | 188  | 186  | 206  | 0.90     | 0.398746 | 206      | 0.89     | 0.445160 |          |
| 247312_at | A15fg63970 | outative protein strom similar to unk copine-related                                                                                      | 30                                                                                                                                        | 61  | 65   | 73   | 80   | 73   | 52   | 75       | 0.70     | 0.112322 | 70       | 82  | 81   | 101  | 106  | 88   | 106  | 106  | 110  | 78   | 102      | 0.76     | 0.005443 | 98       | 0.79     | 0.034518 |
| 247313_at | A15fg63980 | 3(2),5-bisphosphate nucleotide - su 3(2),5-bisphosphate nucleotide / inor                                                                 | 284                                                                                                                                       | 351 | 320  | 447  | 509  | 425  | 319  | 460      | 0.69     | 0.010809 | 340      | 322 | 368  | 479  | 455  | 428  | 427  | 441  | 343  | 446  | 0.77     | 0.000725 | 454      | 0.76     | 0.005113 |          |
| 247314_at | A15fg64000 | 3(2),5-bisphosphate nucleotide (emb 3(2),5-bisphosphate nucleotide, puta                                                                  | 72                                                                                                                                        | 94  | 111  | 94   | 122  | 92   | 92   | 103      | 0.90     | 0.513087 | 39       | 36  | 42   | 45   | 43   | 46   | 47   | 43   | 39   | 45   | 0.88     | 0.015150 | 45       | 0.88     | 0.045217 |          |
| 247315_at | A15fg64010 | expressed protein                                                                                                                         | 126                                                                                                                                       | 159 | 164  | 164  | 152  | 188  | 0.81 | 0.130387 | 133      | 163      | 166      | 209 | 163  | 151  | 172  | 148  | 154  | 165  | 151  | 151  | 0.91     | 0.055019 | 172      | 0.87     | 0.022166 |          |
| 247316_at | A15fg64030 | ankyrin-like protein                                                                                                                      | 501                                                                                                                                       | 607 | 553  | 721  | 816  | 559  | 554  | 699      | 0.79     | 0.147640 | 452      | 337 | 479  | 564  | 488  | 452  | 514  | 491  | 423  | 502  | 0.84     | 0.096184 | 501      | 0.84     | 0.222601 |          |
| 247317_at | A15fg64060 | outative protein contains similarity to Nu no apical meristem (NAM) family protein                                                        | 152                                                                                                                                       | 165 | 152  | 227  | 234  | 188  | 153  | 217      | 0.71     | 0.011753 | 85       | 80  | 93   | 120  | 107  | 91   | 88   | 86   | 86   | 99   | 0.87     | 0.217562 | 106      | 0.81     | 0.096838 |          |
| 247318_at | A15fg63990 | 3(2),5-bisphosphate nucleotide - su 3(2),5-bisphosphate nucleotide, outa                                                                  | 82                                                                                                                                        | 87  | 97   | 110  | 123  | 95   | 89   | 109      | 0.81     | 0.090165 | 114      | 120 | 127  | 131  | 108  | 95   | 118  | 108  | 121  | 110  | 1.10     | 0.230752 | 108      | 1.12     | 0.334360 |          |
| 247319_at | A15fg64050 | utamate-RNA liase - supported by c glutamate-RNA liase family protein / c                                                                 | 70                                                                                                                                        | 80  | 88   | 84   | 82   | 74   | 80   | 88       | 0.99     | 0.950139 | 54       | 74  | 55   | 59   | 48   | 59   | 54   | 53   | 100  | 89   | 0.94     | 0.849886 | 51       | 1.04     | 0.648032 |          |
| 247320_at | A15fg64040 | phosphotransferase 4 kinase (emb)CA4 phosphatidylinositol 4-kinase (PI4K) / p                                                             | 321                                                                                                                                       | 621 | 480  | 431  | 433  | 318  | 474  | 394      | 0.42     | 0.046800 | 489      | 627 | 656  | 822  | 695  | 624  | 602  | 596  | 591  | 668  | 0.88     | 0.301442 | 714      | 0.83     | 0.198317 |          |
| 247321_at | A15fg64070 | unknown protein                                                                                                                           | expressed protein                                                                                                                         | 173 | 246  | 288  | 301  | 330  | 237  | 236      | 290      | 0.81     | 0.281175 | 119 | 126  | 145  | 201  | 148  | 149  | 160  | 155  | 130  | 163      | 0.80     | 0.059933 | 166      | 0.78     | 0.127250 |
| 247322_at | A15fg64090 | outative protein similar to unknown drot denin salisophosphoprotein-related                                                               | 225                                                                                                                                       | 334 | 278  | 380  | 415  | 291  | 279  | 362      | 0.77     | 0.160942 | 273      | 283 | 244  | 431  | 300  | 273  | 330  | 315  | 267  | 330  | 0.81     | 0.137736 | 335      | 0.80     | 0.244663 |          |
| 247323_at | A15fg64170 | outative protein similar to unknown drot denin salisophosphoprotein-related                                                               | 198                                                                                                                                       | 286 | 258  | 333  | 348  | 236  | 248  | 306      | 0.87     | 0.254346 | 213      | 178 | 227  | 341  | 299  | 237  | 296  | 236  | 206  | 274  | 0.75     | 0.057810 | 292      | 0.70     | 0.004931 |          |
| 247324_at | A15fg64180 | outative protein strom similar to unk expressed protein                                                                                   | 24                                                                                                                                        | 22  | 24   | 31   | 16   | 15   | 26   | 15       | 1.67     | 0.032371 | 23       | 27  | 20   | 17   | 13   | 15   | 21   | 20   | 15   | 15   | 0.77     | 0.044281 | 16       | 1.50     | 0.025807 |          |
| 247325_at | A15fg64200 | outative protein contains similarity to sc arginine/serine-rich splicing factor SC35                                                      | 473                                                                                                                                       | 597 | 596  | 654  |      |      |      |          |          |          |          |     |      |      |      |      |      |      |      |      |          |          |          |          |          |          |

|           |           |                                           |                                               |      |      |      |      |      |      |      |      |          |          |      |      |     |      |      |     |      |      |          |      |          |          |      |          |          |
|-----------|-----------|-------------------------------------------|-----------------------------------------------|------|------|------|------|------|------|------|------|----------|----------|------|------|-----|------|------|-----|------|------|----------|------|----------|----------|------|----------|----------|
| 247243_at | A15f64700 | nucleolin-like protein                    | nucleolin MN21 family protein                 | 28   | 35   | 34   | 49   | 55   | 47   | 32   | 50   | 0.65     | 0.005078 | 32   | 32   | 34  | 67   | 52   | 46  | 50   | 45   | 33       | 52   | 0.62     | 0.010592 | 55   | 0.59     | 0.023629 |
| 247244_at | A15f64710 | putative protein similar to unknown pr    | expressed protein                             | 40   | 60   | 51   | 71   | 67   | 72   | 50   | 70   | 0.72     | 0.029263 | 39   | 33   | 47  | 50   | 42   | 41  | 49   | 39   | 40       | 44   | 0.90     | 0.336299 | 44   | 0.90     | 0.422689 |
| 247245_at | A15f64720 | outative protein similar to unknown dr    | hypothetical protein                          | 73   | 102  | 141  | 17   | 14   | 14   | 105  | 15   | 6.93     | 0.010392 | 290  | 351  | 325 | 15   | 13   | 16  | 8    | 14   | 322      | 13   | 24.47    | 0.000000 | 15   | 21.84    | 0.000065 |
| 247246_at | A15f64730 | invertebrate inhibitor of histone acetyl  | histone H4 acetyl methyltransferase inhibitor | 704  | 733  | 364  | 137  | 747  | 338  | 741  | 336  | 2.21     | 0.001628 | 937  | 908  | 871 | 804  | 871  | 870 | 425  | 405  | 423      | 405  | 0.000000 | 0.000000 | 405  | 0.000000 | 0.000000 |
| 247247_at | A15f64650 | 5S ribosomal protein L17                  | 5S ribosomal protein L17 family protein       | 191  | 253  | 245  | 272  | 287  | 254  | 230  | 271  | 0.85     | 0.127688 | 235  | 257  | 256 | 342  | 258  | 253 | 263  | 254  | 240      | 274  | 0.91     | 0.332654 | 284  | 0.88     | 0.305951 |
| 247248_at | A15f64560 | putative protein contains similarity to u | transducin family protein L17 family          | 227  | 289  | 289  | 335  | 341  | 310  | 268  | 329  | 0.82     | 0.055916 | 276  | 301  | 277 | 414  | 374  | 317 | 420  | 381  | 284      | 381  | 0.75     | 0.008311 | 368  | 0.77     | 0.041433 |
| 247249_at | A15f64670 | putative protein similar to unknown pr    | ribosomal protein L15 family protein          | 305  | 370  | 330  | 497  | 526  | 386  | 335  | 470  | 0.71     | 0.045403 | 331  | 339  | 377 | 569  | 412  | 378 | 380  | 316  | 341      | 400  | 0.87     | 0.401063 | 454  | 0.77     | 0.156273 |
| 247250_at | A15f64760 | putative protein similar to transducin f  | transducin family protein / WD-40 repeat      | 197  | 214  | 262  | 270  | 270  | 214  | 262  | 270  | 0.82     | 0.203565 | 166  | 167  | 166 | 232  | 176  | 168 | 176  | 168  | 176      | 232  | 1.04     | 0.506859 | 204  | 0.88     | 0.296632 |
| 247251_at | A15f64740 | cellulose synthase catalytic subunit      | cellulose synthase, catalytic subunit, out    | 387  | 400  | 501  | 564  | 527  | 491  | 429  | 528  | 0.81     | 0.077752 | 367  | 385  | 442 | 575  | 436  | 376 | 495  | 475  | 398      | 471  | 0.84     | 0.168042 | 462  | 0.86     | 0.365867 |
| 247252_at | A15f64770 | unknown protein                           | expressed protein                             | 8    | 7    | 12   | 10   | 12   | 10   | 9    | 11   | 0.84     | 0.352574 | 7    | 11   | 9   | 10   | 7    | 12  | 8    | 7    | 9        | 9    | 1.04     | 0.822848 | 10   | 0.97     | 0.875593 |
| 247253_at | A15f64790 | beta-1,3-glucanase                        | glycosyl hydrolase family 17 protein          | 43   | 45   | 59   | 54   | 65   | 54   | 49   | 58   | 0.85     | 0.215828 | 43   | 41   | 43  | 40   | 37   | 44  | 48   | 46   | 42       | 43   | 0.98     | 0.763370 | 40   | 1.05     | 0.432006 |
| 247254_at | A15f64800 | CLE21, putative                           | putative protein similar to unknown pr        | 14   | 10   | 15   | 12   | 13   | 15   | 13   | 13   | 0.87     | 0.176226 | 5    | 5    | 3   | 8    | 6    | 7   | 6    | 5    | 5        | 6    | 0.89     | 0.580361 | 6    | 0.87     | 0.625495 |
| 247255_at | A15f64780 | putative protein similar to unknown pr    | expressed protein                             | 66   | 88   | 80   | 82   | 61   | 79   | 74   | 1.06 | 0.657479 | 83       | 91   | 84   | 99  | 75   | 64   | 68  | 69   | 86   | 75       | 1.15 | 0.234301 | 79       | 1.09 | 0.546861 |          |
| 247256_at | A15f64730 | putative protein contains similarity to u | transducin family protein / WD-40 repeat      | 191  | 263  | 282  | 285  | 356  | 259  | 246  | 300  | 0.82     | 0.248712 | 236  | 254  | 270 | 340  | 275  | 282 | 257  | 261  | 253      | 283  | 0.89     | 0.207568 | 299  | 0.85     | 0.114733 |
| 247257_at | A15f64760 | proteasome regulatory subunit-like ; s    | 26S proteasome regulatory subunit, puta       | 261  | 331  | 351  | 409  | 414  | 343  | 389  | 81   | 0.103834 | 244      | 230  | 279  | 368 | 298  | 278  | 251 | 296  | 85   | 0.153014 | 312  | 0.80     | 0.128484 |      |          |          |
| 247258_at | A15f64816 | expressed protein similar to unknown o    | expressed protein                             | 395  | 462  | 519  | 535  | 579  | 482  | 459  | 532  | 0.86     | 0.182603 | 480  | 446  | 542 | 620  | 565  | 499 | 541  | 493  | 489      | 543  | 0.90     | 0.195117 | 591  | 0.87     | 0.184915 |
| 247259_at | A15f64930 | CPR5 protein, outative Constitutive ex    | CPR5 protein, putative                        | 301  | 459  | 481  | 499  | 524  | 398  | 414  | 473  | 0.87     | 0.433662 | 310  | 272  | 332 | 462  | 360  | 311 | 412  | 382  | 304      | 385  | 0.79     | 0.066227 | 377  | 0.81     | 0.201066 |
| 247262_at | A15f64940 | ABC transporter-like                      | ABC1 family protein                           | 325  | 592  | 534  | 555  | 578  | 394  | 484  | 509  | 0.95     | 0.813448 | 266  | 229  | 303 | 483  | 379  | 276 | 302  | 295  | 266      | 347  | 0.77     | 0.179469 | 379  | 0.70     | 0.148528 |
| 247263_at | A15f64970 | mitochondrial carrier protein-like        | mitochondrial substrate carrier family, out   | 126  | 145  | 164  | 173  | 190  | 154  | 145  | 172  | 0.84     | 0.144059 | 116  | 131  | 138 | 162  | 123  | 133 | 132  | 134  | 128      | 137  | 0.93     | 0.405332 | 140  | 0.92     | 0.441830 |
| 247264_at | A15f64980 | putative protein similar to unknown pr    | expressed protein                             | 100  | 125  | 114  | 182  | 161  | 145  | 113  | 163  | 0.69     | 0.018389 | 103  | 85   | 111 | 181  | 126  | 109 | 140  | 129  | 100      | 137  | 0.73     | 0.070740 | 139  | 0.72     | 0.164705 |
| 247264_at | A15f64990 | GTP binding protein-like                  | Ras-related GTP-binding protein, putati       | 79   | 89   | 96   | 103  | 124  | 96   | 88   | 108  | 0.82     | 0.110949 | 43   | 59   | 55  | 89   | 57   | 60  | 55   | 53   | 53       | 63   | 0.83     | 0.307394 | 69   | 0.76     | 0.216000 |
| 247265_at | A15f64890 | unknown protein ; supported by full-len   | expressed protein                             | 28   | 39   | 52   | 39   | 48   | 43   | 40   | 43   | 0.92     | 0.677314 | 32   | 34   | 38  | 29   | 25   | 30  | 40   | 28   | 35       | 31   | 1.14     | 0.281669 | 28   | 1.24     | 0.407648 |
| 247266_at | A15f64950 | outative protein similar to unknown dr    | mitochondrial transcription termination f     | 186  | 236  | 247  | 254  | 252  | 229  | 223  | 245  | 0.91     | 0.340906 | 189  | 200  | 218 | 298  | 208  | 201 | 241  | 233  | 202      | 236  | 0.86     | 0.203582 | 236  | 0.86     | 0.359060 |
| 247267_at | A15f65000 | putative protein similar to unknown dr    | nucleotide-sucrose transporter family, out    | 705  | 841  | 938  | 990  | 1092 | 844  | 828  | 975  | 0.85     | 0.209884 | 830  | 909  | 898 | 1297 | 1055 | 949 | 1029 | 924  | 879      | 1051 | 0.84     | 0.105247 | 1100 | 0.80     | 0.104790 |
| 247268_at | A15f64870 | nucleolin-like ; supported by full-length | c expressed protein                           | 1401 | 1180 | 1615 | 1631 | 2295 | 1513 | 1465 | 1813 | 0.81     | 0.322094 | 1081 | 1148 | 816 | 933  | 772  | 867 | 1054 | 1029 | 1015     | 931  | 1.09     | 0.439530 | 857  | 1.18     | 0.232127 |
| 247269_at | A15f64830 | putative protein contains similarity to u | procardiomelin cell death 2 C-terminal dom    | 148  | 191  | 218  | 233  | 269  | 208  | 186  | 236  | 0.79     | 0.136811 | 184  | 204  | 202 | 306  | 234  | 231 | 224  | 213  | 197      | 242  | 0.81     | 0.093399 | 257  | 0.77     | 0.076103 |
| 247270_at | A15f65020 | annexin ; supported by full-length cDN    | annexin 2 (ANN2)                              | 1136 | 1167 | 1203 | 1456 | 1529 | 1282 | 1169 | 1422 | 0.82     | 0.028622 | 813  | 924  | 928 | 1313 | 1050 | 880 | 900  | 884  | 889      | 1006 | 0.88     | 0.344226 | 1081 | 0.82     | 0.216478 |
| 247271_at | A15f64880 | unknown protein ; supported by full-len   | expressed protein                             | 292  | 441  | 510  | 414  | 481  | 339  | 419  | 411  | 1.01     | 0.972190 | 364  | 391  | 366 | 469  | 376  | 377 | 418  | 358  | 374      | 400  | 0.93     | 0.370600 | 400  | 0.92     | 0.349108 |
| 247272_at | A15f65040 | outative protein similar to unknown dr    | expression-associated protein-related         | 90   | 131  | 172  | 182  | 173  | 161  | 131  | 172  | 0.76     | 0.167800 | 250  | 271  | 224 | 461  | 365  | 375 | 384  | 387  | 248      | 394  | 0.63     | 0.001086 | 400  | 0.62     | 0.010457 |
| 247273_at | A15f64900 | Expressed protein ; supported by full-len | expressed protein                             | 704  | 619  | 779  | 619  | 657  | 727  | 619  | 657  | 0.85     | 0.031693 | 722  | 657  | 685 | 718  | 685  | 685 | 718  | 685  | 685      | 718  | 0.86     | 0.608156 | 718  | 0.86     | 0.396122 |
| 247274_at | A15f64850 | putative protein similar to unknown pr    | expressed protein                             | 197  | 202  | 206  | 381  | 363  | 299  | 201  | 347  | 0.58     | 0.004254 | 206  | 179  | 204 | 452  | 333  | 300 | 253  | 252  | 197      | 318  | 0.62     | 0.049080 | 362  | 0.54     | 0.024428 |
| 247275_at | A15f64905 | Expressed protein ; supported by full-len | expressed protein                             | 15   | 13   | 15   | 15   | 18   | 17   | 14   | 17   | 0.86     | 0.037845 | 18   | 14   | 18  | 12   | 13   | 18  | 10   | 17   | 13       | 12   | 1.28     | 0.131494 | 12   | 1.35     | 0.045971 |
| 247276_at | A15f64860 | 4-alpha-glucanotransferase ; supporte     | 4-alpha-glucanotransferase, putative / di     | 282  | 340  | 393  | 368  | 501  | 347  | 338  | 405  | 0.83     | 0.312190 | 362  | 338  | 340 | 372  | 381  | 343 | 460  | 418  | 347      | 395  | 0.88     | 0.132650 | 365  | 0.95     | 0.251192 |
| 247277_at | A15f65050 | MADS box transcription factor-like or     | MADS-box protein (MAF2)                       | 238  | 342  | 340  | 304  | 372  | 311  | 307  | 341  | 0.90     | 0.438559 | 328  | 384  | 390 | 474  | 412  | 386 | 331  | 354  | 368      | 391  | 0.94     | 0.533432 | 424  | 0.87     | 0.157791 |
| 247278_at | A15f65010 | asparagine synthetase (asfA/C2837,        | asparagine synthetase 2 (ASN2)                | 411  | 466  | 576  | 866  | 773  | 680  | 488  | 773  | 0.64     | 0.041451 | 488  | 540  | 649 | 1082 | 763  | 608 | 733  | 715  | 559      | 780  | 0.72     | 0.095119 | 818  | 0.68     | 0.153420 |
| 247279_at | A15f64920 | COP1-interacting protein CIP8 ; succo     | COP1-interacting protein (CIP8) / zinc fi     | 118  | 172  | 184  | 157  | 184  | 139  | 158  | 160  | 0.99     | 0.947999 | 128  | 144  | 137 | 181  | 142  | 124 | 149  | 150  | 136      | 149  | 0.91     | 0.344153 | 149  | 0.91     | 0.490929 |
| 247280_at | A15f64960 | cdc2-like protein kinase ; supported by   | cyclin-dependent kinase, putative / CDK       | 425  | 501  | 505  | 641  | 726  | 530  | 477  | 633  | 0.75     | 0.087928 | 506  | 409  | 487 | 659  | 556  | 515 | 543  | 524  | 468      | 560  | 0.84     | 0.085460 | 577  | 0.81     | 0.104490 |
| 247281_at | A15f64813 | Expressed protein ; supported by cDN      | GTP-binding protein-related                   | 148  | 175  | 179  | 190  | 169  | 188  | 190  | 0.88 | 0.236970 | 148      | 155  | 178  | 152 | 142  | 171  | 154 | 146  | 162  | 146      | 162  | 0.86     | 0.359598 | 158  | 0.82     | 0.396122 |
| 247282_at | A15f64840 | ABC transporter protein 1-like ; suppo    | ABC transporter family protein                | 218  | 367  | 380  | 305  | 328  | 233  | 321  | 289  | 1.11     | 0.624001 | 169  | 171  | 212 | 280  | 234  | 173 | 199  | 202  | 184      | 218  | 0.85     | 0.251089 | 229  | 0.80     | 0.255071 |
| 247283_at | A15f65070 | MADS box transcription factor-like        | MADS-box protein (MAF4)                       | 21   | 27   | 29   | 30   | 29   | 25   | 28   | 0.90 | 0.377393 | 24       | 24   | 24   | 28  | 22   | 24   | 28  | 30   | 24   | 26       | 0.92 | 0.308145 | 24       | 0.99 | 0.483655 |          |
| 247284_at | A15f65080 | MADS box transcription factor-like or     | MADS-box family protein                       | 19   | 18   | 28   | 17   | 20   | 19   | 22   | 19   | 1.17     | 0.396210 | 26   | 44   | 30  | 40   | 20   | 33  | 43   | 41   | 33       | 35   | 0.95     | 0.795403 | 31   | 1.08     | 0.770711 |
| 247285_at | A15f65090 | inostol-1, 4, 5-tetraphosphate 5-phosph   | adenosine/adenosine/exonuclease/chophatase    | 25   | 34   | 33   | 30   | 33   | 30   | 32   | 30   | 0.83     | 0.460812 | 26   | 29   | 30  | 29   | 27   | 29  | 25   | 26   | 29       | 27   | 1.06     | 0.330570 | 28   | 0.91     | 0.850083 |
| 247286_at | A15f65100 | putative protein contains similarity to   | 14c ethylene insensitive 3 family protein     | 45   | 50   | 76   | 72   | 69   | 68   | 57   | 70   | 0.81     | 0.257191 | 28   | 47   | 31  | 37   | 32   | 44  | 36   | 47   | 31       | 36   | 0.89     | 0.492740 | 35   | 0.93     | 0.102088 |
| 247287_at | A15f65130 | putative protein contains similarity to   | AI AP2 domain-containing transcription fac    | 60   | 71   | 80   | 72   | 93   | 68   | 70   | 78   | 0.90     | 0.472300 | 47   | 41   | 54  | 43   | 37   | 39  | 52   | 46   | 47       | 44   | 1.09     | 0.431905 | 40   | 1.19     | 0.145951 |
| 247288_at | A15f65140 | trihexose-6-phosphate phosphatase         | trihexose-6-phosphate phosphatase, pu         | 259  | 303  | 353  | 50   | 34   | 31   | 305  | 38   | 7.96     | 0.000647 | 247  | 217  | 275 | 116  | 83   | 89  | 88   | 82   | 246      | 92   | 2.69     | 0.000044 | 96   | 2.57     | 0.001520 |
| 247289_at | A15f65160 | outative protein contains similarity to   | tetrahelocysteine repeat (TPR)-containin      | 36   | 40   | 40   | 41   | 48   | 42   | 41   | 43   | 0.95     | 0.637179 | 30   | 35   | 37  | 33   | 30   | 31  | 41   | 35   | 34       | 34   | 1.01     | 0.913786 | 31   | 1.09     | 0.240750 |
| 247290_at | A15f65170 | outative protein similar to unknown pr    | expressed protein                             | 46   | 59   | 47   | 35</ |      |      |      |      |          |          |      |      |     |      |      |     |      |      |          |      |          |          |      |          |          |

|           |           |                                          |                                             |     |      |      |      |      |     |     |      |      |          |     |     |     |      |      |      |      |      |     |      |          |          |      |          |          |
|-----------|-----------|------------------------------------------|---------------------------------------------|-----|------|------|------|------|-----|-----|------|------|----------|-----|-----|-----|------|------|------|------|------|-----|------|----------|----------|------|----------|----------|
| 247156_at | A15f65770 | lysosomal Pro-X carboxypeptidase         | serine carboxypeptidase S28 family prot     | 366 | 467  | 526  | 599  | 717  | 537 | 453 | 618  | 0.77 | 0.079503 | 468 | 447 | 505 | 715  | 623  | 540  | 606  | 597  | 473 | 616  | 0.77     | 0.011473 | 626  | 0.76     | 0.045895 |
| 247157_at | A15f65770 | nuclear matrix constituent protein 1 (N  | nuclear matrix constituent protein-relate   | 175 | 248  | 233  | 256  | 270  | 209 | 218 | 245  | 0.89 | 0.408637 | 128 | 114 | 126 | 173  | 156  | 146  | 144  | 138  | 122 | 147  | 0.83     | 0.066415 | 162  | 0.81     | 0.011876 |
| 247158_at | A15f65780 | branched-chain amino acid aminotrans     | branched-chain amino acid aminotransf       | 290 | 386  | 393  | 429  | 499  | 307 | 356 | 442  | 0.81 | 0.127241 | 359 | 351 | 381 | 590  | 441  | 302  | 436  | 419  | 364 | 456  | 0.80     | 0.097182 | 475  | 0.77     | 0.139271 |
| 247159_at | A15f65800 | L-carnitine:acetyl-CoA transferase       | L-carnitine:acetyl-CoA transferase          | 41  | 63   | 62   | 62   | 79   | 37  | 40  | 65   | 0.79 | 0.133605 | 38  | 43  | 40  | 45   | 41   | 36   | 41   | 32   | 41  | 40   | 1.03     | 0.077631 | 42   | 1.03     | 0.041301 |
| 247160_at | A15f65820 | putative protein contains similarity to  | putative protein contains similarity to     | 22  | 23   | 28   | 35   | 37   | 29  | 25  | 34   | 0.73 | 0.032467 | 13  | 14  | 13  | 11   | 12   | 10   | 10   | 13   | 13  | 11   | 1.15     | 0.069737 | 11   | 1.19     | 0.028343 |
| 247161_at | A15f65810 | putative protein similar to unknown pr   | expressed protein                           | 435 | 409  | 442  | 548  | 613  | 475 | 456 | 545  | 0.84 | 0.109901 | 477 | 437 | 514 | 676  | 557  | 487  | 486  | 477  | 476 | 537  | 0.89     | 0.296596 | 573  | 0.83     | 0.177296 |
| 247162_at | A15f65930 | xylocidin endo-transglycosylase-like     | xylocidin:xylocosyl transferase, put        | 58  | 292  | 78   | 81   | 102  | 64  | 143 | 82   | 1.73 | 0.470889 | 40  | 50  | 46  | 80   | 53   | 58   | 64   | 48   | 45  | 63   | 0.72     | 0.081668 | 70   | 0.64     | 0.025067 |
| 247163_at | A15f65930 | putative protein similar to unknown pr   | expressed protein                           | 211 | 301  | 307  | 367  | 356  | 211 | 280 | 307  | 0.87 | 0.133605 | 33  | 230 | 217 | 280  | 230  | 242  | 260  | 278  | 278 | 280  | 0.79     | 0.010648 | 277  | 0.85     | 0.045619 |
| 247164_at | A15f65720 | NiS-like aminotransferase - supporte     | supported cysteine desulfurase, mitochond   | 534 | 732  | 689  | 814  | 913  | 718 | 652 | 815  | 0.80 | 0.118670 | 540 | 563 | 616 | 850  | 645  | 618  | 601  | 598  | 573 | 662  | 0.86     | 0.221733 | 704  | 0.81     | 0.161592 |
| 247165_at | A15f65790 | transcription factor similar to: sucoo   | myo myo family transcription factor (MYB88) | 20  | 16   | 25   | 20   | 21   | 26  | 20  | 22   | 0.91 | 0.544913 | 14  | 20  | 15  | 16   | 10   | 13   | 23   | 16   | 16  | 15   | 1.04     | 0.832451 | 13   | 1.24     | 0.291125 |
| 247166_at | A15f65840 | unknown protein                          | expressed protein                           | 64  | 92   | 93   | 126  | 129  | 111 | 83  | 122  | 0.68 | 0.025203 | 82  | 102 | 96  | 161  | 112  | 104  | 103  | 100  | 93  | 116  | 0.80     | 0.193690 | 126  | 0.74     | 0.156630 |
| 247167_at | A15f65850 | unknown protein                          | F-box family protein                        | 27  | 36   | 39   | 46   | 46   | 37  | 37  | 40   | 0.92 | 0.690790 | 43  | 39  | 43  | 36   | 38   | 38   | 43   | 34   | 42  | 38   | 1.09     | 0.198281 | 38   | 1.10     | 0.122610 |
| 247168_at | A15f65860 | putative protein contains similarity to  | pr ankryn repeat family protein             | 233 | 292  | 314  | 374  | 368  | 312 | 279 | 351  | 0.80 | 0.082639 | 315 | 365 | 384 | 508  | 386  | 379  | 527  | 450  | 346 | 470  | 0.74     | 0.077084 | 454  | 0.77     | 0.022301 |
| 247169_at | A15f65870 | putative protein similar to unknown pr   | phytoylsulfokines 5 (PSK5)                  | 19  | 20   | 27   | 35   | 33   | 32  | 22  | 33   | 0.66 | 0.013257 | 27  | 22  | 35  | 58   | 43   | 37   | 81   | 63   | 28  | 57   | 0.49     | 0.036757 | 46   | 0.60     | 0.067301 |
| 247170_at | A15f65830 | putative protein contains similarity to  | re leucine-rich repeat family protein       | 81  | 102  | 85   | 127  | 156  | 113 | 89  | 132  | 0.68 | 0.038471 | 62  | 57  | 68  | 104  | 94   | 89   | 78   | 76   | 62  | 88   | 0.70     | 0.101851 | 96   | 0.65     | 0.003290 |
| 247171_at | A15f65880 | unknown protein                          | expressed protein                           | 203 | 291  | 315  | 309  | 338  | 297 | 270 | 315  | 0.86 | 0.281440 | 277 | 287 | 271 | 417  | 266  | 286  | 345  | 312  | 278 | 325  | 0.86     | 0.235116 | 323  | 0.86     | 0.042149 |
| 247172_at | A15f65950 | unknown protein                          | expressed protein                           | 367 | 470  | 506  | 550  | 606  | 429 | 448 | 529  | 0.85 | 0.230927 | 328 | 308 | 333 | 429  | 367  | 301  | 403  | 405  | 323 | 381  | 0.85     | 0.103750 | 366  | 0.88     | 0.321424 |
| 247173_at | A15f65960 | unknown protein - supported by full-len  | c-enc expressed protein                     | 281 | 418  | 431  | 441  | 479  | 380 | 377 | 433  | 0.87 | 0.389363 | 317 | 376 | 340 | 493  | 380  | 349  | 369  | 404  | 344 | 399  | 0.86     | 0.176120 | 407  | 0.85     | 0.250645 |
| 247174_at | A15f65910 | unknown protein - supported by cDNA: BSD | domain-containing protein                   | 108 | 155  | 154  | 183  | 183  | 145 | 139 | 170  | 0.82 | 0.194342 | 145 | 172 | 136 | 210  | 177  | 159  | 183  | 185  | 151 | 183  | 0.83     | 0.056960 | 182  | 0.83     | 0.169253 |
| 247175_at | A15f65930 | kinase-like calmodulin-binding protein   | kinase-like calmodulin-binding protein G    | 289 | 331  | 327  | 381  | 423  | 277 | 316 | 360  | 0.88 | 0.380814 | 186 | 176 | 225 | 273  | 251  | 212  | 210  | 225  | 196 | 234  | 0.84     | 0.098798 | 245  | 0.80     | 0.106666 |
| 247176_at | A15f65970 | Mto protein-like - supported by cDNA: c  | seven transmembrane MLO family pro          | 31  | 51   | 59   | 41   | 45   | 34  | 46  | 40   | 1.17 | 0.496069 | 38  | 33  | 40  | 23   | 23   | 23   | 28   | 25   | 37  | 24   | 1.53     | 0.000460 | 23   | 1.61     | 0.001806 |
| 247177_at | A15f65940 | 3-hydroxyisobutyl-coenzyme A hydro       | 3-hydroxyisobutyl-coenzyme A hydro          | 314 | 441  | 423  | 476  | 511  | 390 | 393 | 459  | 0.86 | 0.281885 | 621 | 580 | 610 | 812  | 694  | 633  | 620  | 625  | 604 | 677  | 0.89     | 0.189555 | 713  | 0.85     | 0.113383 |
| 247178_at | A15f65890 | uniridvM transferases-like - supporte    | d by ACT domain-containing protein (ACR1)   | 67  | 94   | 98   | 109  | 100  | 90  | 87  | 100  | 0.87 | 0.306858 | 53  | 52  | 65  | 77   | 59   | 58   | 78   | 67   | 57  | 68   | 0.83     | 0.127405 | 65   | 0.87     | 0.328872 |
| 247179_at | A15f65900 | ATP-dependent RNA helicase-like - su     | DEAD/DEAH box helicase, putative            | 240 | 227  | 212  | 286  | 311  | 221 | 226 | 273  | 0.83 | 0.172018 | 199 | 170 | 210 | 272  | 211  | 176  | 219  | 225  | 193 | 221  | 0.88     | 0.283296 | 220  | 0.88     | 0.433459 |
| 247180_at | A15f65990 | amino acid transporter protein-like      | amino acid transporter family protein       | 195 | 216  | 285  | 252  | 309  | 254 | 232 | 275  | 0.84 | 0.255142 | 228 | 243 | 240 | 392  | 289  | 272  | 350  | 339  | 237 | 328  | 0.72     | 0.020708 | 318  | 0.75     | 0.102045 |
| 247181_at | A15f66100 | putative protein contains similarity to  | re heterogeneous nuclear ribonucleoprotei   | 262 | 383  | 367  | 463  | 470  | 361 | 337 | 398  | 0.85 | 0.306267 | 390 | 421 | 368 | 424  | 416  | 378  | 414  | 379  | 383 | 422  | 0.93     | 0.460331 | 439  | 0.89     | 0.371105 |
| 247182_at | A15f66020 | putative protein non-consensus AT do     | phosphoinositide phosphatase family pr      | 57  | 64   | 74   | 48   | 54   | 41  | 65  | 48   | 1.35 | 0.049995 | 56  | 50  | 57  | 37   | 36   | 66   | 44   | 45   | 54  | 45   | 1.19     | 0.292062 | 46   | 1.17     | 0.486791 |
| 247183_at | A15f66050 | unknown protein                          | expressed protein                           | 236 | 385  | 378  | 318  | 377  | 261 | 333 | 319  | 1.04 | 0.822945 | 360 | 434 | 361 | 469  | 412  | 423  | 407  | 379  | 385 | 418  | 0.92     | 0.261213 | 435  | 0.89     | 0.172433 |
| 247184_at | A15f66060 | crovli 4-hydroxylase, alpha subunit      | crovli 4-hydroxylase, alpha subunit         | 106 | 110  | 130  | 128  | 144  | 127 | 115 | 133  | 0.87 | 0.126280 | 98  | 133 | 99  | 150  | 105  | 108  | 108  | 115  | 110 | 117  | 0.94     | 0.636216 | 121  | 0.91     | 0.597231 |
| 247185_at | A15f66100 | putative protein contains similarity to  | ur zinc finger (C2HC4-type RING finger)     | 149 | 141  | 177  | 162  | 182  | 141 | 149 | 165  | 0.84 | 0.248061 | 158 | 165 | 142 | 152  | 163  | 145  | 142  | 152  | 163 | 102  | 0.799831 | 146      | 1.00 | 0.090730 |          |
| 247186_at | A15f66080 | unknown protein                          | protein phosphatase 2C family protein       | 68  | 64   | 105  | 87   | 96   | 84  | 79  | 89   | 0.89 | 0.504089 | 57  | 56  | 70  | 72   | 49   | 58   | 86   | 77   | 61  | 69   | 0.89     | 0.455793 | 60   | 1.02     | 0.886299 |
| 247187_at | A15f66100 | putative protein similar to unknown pr   | La domain-containing protein                | 183 | 210  | 215  | 217  | 285  | 194 | 202 | 232  | 0.87 | 0.385353 | 227 | 227 | 230 | 320  | 254  | 237  | 272  | 288  | 228 | 274  | 0.83     | 0.050822 | 270  | 0.84     | 0.168838 |
| 247188_at | A15f66110 | atfp-like protein                        | atfp-like protein                           | 22  | 26   | 34   | 39   | 34   | 34  | 28  | 36   | 0.77 | 0.103807 | 17  | 24  | 25  | 24   | 22   | 18   | 29   | 27   | 22  | 24   | 0.92     | 0.379557 | 21   | 1.04     | 0.822261 |
| 247189_at | A15f66150 | alpha-mannosidase                        | glycosyl hydrolase family 38 protein        | 18  | 23   | 27   | 22   | 22   | 22  | 18  | 23   | 1.07 | 0.579105 | 18  | 17  | 23  | 18   | 14   | 11   | 19   | 15   | 20  | 16   | 1.27     | 0.103775 | 14   | 1.37     | 0.090730 |
| 247190_at | A15f66180 | putative protein contains similarity to  | nL expressed protein                        | 185 | 261  | 243  | 231  | 311  | 212 | 230 | 251  | 0.91 | 0.599115 | 215 | 213 | 193 | 277  | 242  | 225  | 248  | 246  | 207 | 248  | 0.84     | 0.016349 | 248  | 0.83     | 0.070734 |
| 247191_at | A15f66190 | ferredoxin-NADP+ reductase               | ferredoxin-NAD(P)+ reductase, outative      | 375 | 609  | 537  | 550  | 567  | 465 | 507 | 527  | 0.96 | 0.800597 | 718 | 678 | 648 | 858  | 716  | 700  | 907  | 869  | 681 | 810  | 0.84     | 0.070216 | 758  | 0.90     | 0.229495 |
| 247192_at | A15f66200 | putative protein strongly similar to un  | k arkamidibeta-catenin repress family pr    | 235 | 203  | 247  | 263  | 291  | 216 | 229 | 257  | 0.89 | 0.328912 | 231 | 198 | 203 | 291  | 239  | 190  | 305  | 288  | 211 | 263  | 0.80     | 0.126016 | 240  | 0.88     | 0.392252 |
| 247193_at | A15f66220 | putative protein contains similarity to  | chalcone flavanone isomerase, putative      | 46  | 53   | 71   | 62   | 72   | 63  | 57  | 66   | 0.86 | 0.322799 | 50  | 44  | 53  | 52   | 44   | 48   | 51   | 47   | 49  | 48   | 1.01     | 0.860816 | 46   | 1.02     | 0.704698 |
| 247194_at | A15f66230 | putative protein similar to unknown pr   | expressed protein                           | 362 | 457  | 396  | 473  | 543  | 436 | 405 | 484  | 0.84 | 0.134374 | 336 | 288 | 350 | 432  | 377  | 311  | 332  | 296  | 324 | 349  | 0.93     | 0.510372 | 373  | 0.87     | 0.280596 |
| 247195_at | A15f66260 | auxin-induced protein-like               | auxin-responsive protein, putative          | 18  | 21   | 28   | 26   | 29   | 26  | 22  | 27   | 0.83 | 0.233397 | 20  | 23  | 22  | 24   | 19   | 42   | 21   | 21   | 21  | 25   | 0.85     | 0.510752 | 28   | 0.75     | 0.364911 |
| 247196_at | A15f66170 | senescence-associated protein contain    | senescence-associated protein-relate        | 117 | 136  | 219  | 118  | 144  | 121 | 157 | 128  | 1.23 | 0.411791 | 146 | 154 | 138 | 164  | 150  | 112  | 157  | 163  | 146 | 149  | 0.98     | 0.804730 | 142  | 1.03     | 0.821479 |
| 247197_at | A15f66210 | calcium-dependent protein kinase         | calcium-dependent protein kinase famly      | 267 | 373  | 423  | 447  | 575  | 425 | 321 | 515  | 0.82 | 0.047266 | 227 | 200 | 321 | 208  | 339  | 281  | 241  | 311  | 212 | 387  | 0.90     | 0.031990 | 287  | 0.74     | 0.062031 |
| 247198_at | A15f66120 | 3-dehydroquinate synthase-like pro       | 3-dehydroquinate synthase, putative         | 387 | 450  | 420  | 600  | 679  | 555 | 452 | 611  | 0.72 | 0.025364 | 568 | 501 | 607 | 655  | 624  | 759  | 690  | 657  | 624 | 830  | 0.87     | 0.072316 | 741  | 0.75     | 0.036988 |
| 247199_at | A15f66090 | unknown protein - supported by full-len  | c-enc expressed protein                     | 187 | 253  | 229  | 248  | 265  | 231 | 223 | 248  | 0.90 | 0.310780 | 252 | 291 | 288 | 355  | 277  | 256  | 275  | 281  | 277 | 289  | 0.96     | 0.655738 | 296  | 0.94     | 0.596835 |
| 247200_at | A15f66250 | putative protein similar to unknown pr   | kinectin-related                            | 159 | 244  | 288  | 252  | 312  | 197 | 230 | 254  | 0.91 | 0.660329 | 251 | 259 | 227 | 387  | 295  | 290  | 302  | 313  | 245 | 317  | 0.77     | 0.027334 | 324  | 0.76     | 0.076007 |
| 247201_at | A15f66240 | WD repeat protein-like - supported by    | fu transducin family protein / WD-40 repeat | 687 | 1015 | 1044 | 1124 | 1296 | 962 | 915 | 1127 | 0.81 | 0.229055 | 949 | 987 | 977 | 1401 | 1158 | 1125 | 1080 | 1048 | 971 | 1162 | 0.84     | 0.062590 | 1228 | 0.79     | 0.043096 |
| 247202_at | A15f66040 | unknown protein almost                   | senescence-associated family protein        | 140 | 169  | 172  | 181  | 245  |     |     |      |      |          |     |     |     |      |      |      |      |      |     |      |          |          |      |          |          |

|             |           |                                                                                              |      |      |      |      |      |     |      |      |          |          |      |      |      |      |      |      |      |      |      |      |          |          |          |          |          |          |
|-------------|-----------|----------------------------------------------------------------------------------------------|------|------|------|------|------|-----|------|------|----------|----------|------|------|------|------|------|------|------|------|------|------|----------|----------|----------|----------|----------|----------|
| 247061_at   | A15f66780 | putative protein similar to unknown proI expressed protein                                   | 14   | 18   | 49   | 277  | 17   | 17  | 27   | 104  | 0.26     | 0.432524 | 12   | 13   | 10   | 15   | 11   | 9    | 16   | 12   | 12   | 13   | 0.92     | 0.590429 | 12       | 1.00     | 0.988595 |          |
| 247062_at   | A15f66810 | putative protein similar to unknown proI expressed protein                                   | 119  | 158  | 174  | 160  | 192  | 146 | 150  | 166  | 0.90     | 0.498809 | 162  | 136  | 167  | 188  | 174  | 158  | 165  | 155  | 155  | 168  | 0.92     | 0.270566 | 173      | 0.89     | 0.232399 |          |
| 247063_at   | A15f66820 | unknown protein                                                                              | 126  | 167  | 129  | 157  | 174  | 136 | 140  | 156  | 0.90     | 0.418071 | 159  | 148  | 148  | 228  | 197  | 153  | 217  | 195  | 162  | 198  | 0.77     | 0.036787 | 193      | 0.79     | 0.136460 |          |
| 247064_at   | A15f66850 | putative protein contains similarity to unknown proI expressed protein                       | 16   | 19   | 23   | 22   | 140  | 12  | 19   | 21   | 0.95     | 0.456194 | 15   | 12   | 13   | 15   | 11   | 15   | 13   | 17   | 13   | 17   | 1.32     | 0.121621 | 13       | 1.06     | 0.242041 |          |
| 247065_x_at | A15f66900 | disease resistance protein-like disease resistance protein (CC-NBS-LR                        | 236  | 316  | 318  | 366  | 378  | 288 | 290  | 344  | 0.84     | 0.240695 | 196  | 168  | 195  | 259  | 223  | 190  | 269  | 269  | 263  | 168  | 241      | 0.78     | 0.043482 | 224      | 0.83     | 0.160501 |
| 247066_at   | A15f66940 | DNA binding protein-like Dof-type zinc finger domain-containing c                            | 59   | 67   | 78   | 91   | 90   | 86  | 68   | 89   | 0.77     | 0.020613 | 49   | 55   | 63   | 65   | 44   | 46   | 58   | 58   | 56   | 54   | 1.03     | 0.822219 | 51       | 1.08     | 0.625330 |          |
| 247067_at   | A15f66950 | putative protein strong similarity to unk expressed protein                                  | 206  | 228  | 242  | 277  | 313  | 249 | 225  | 280  | 0.81     | 0.064492 | 192  | 184  | 229  | 297  | 227  | 243  | 270  | 202  | 250  | 0.81 | 0.074956 | 246      | 0.82     | 0.210126 |          |          |
| 247068_at   | A15f66980 | putative protein similar to unknown proI expressed protein                                   | 146  | 212  | 202  | 213  | 241  | 207 | 253  | 263  | 0.82     | 0.239733 | 79   | 81   | 136  | 96   | 156  | 116  | 121  | 127  | 137  | 156  | 1.16     | 0.149454 | 131      | 0.68     | 0.031525 |          |
| 247069_at   | A15f66920 | pectinesterase like protein: supported   multi-cooper oxidase type I family protein          | 91   | 193  | 235  | 200  | 212  | 185 | 206  | 199  | 1.04     | 0.682388 | 347  | 380  | 279  | 349  | 292  | 263  | 393  | 371  | 335  | 334  | 1.00     | 0.963730 | 301      | 1.11     | 0.429202 |          |
| 247070_at   | A15f66815 | Expressed protein : supported by full-length expressed protein                               | 9    | 8    | 10   | 7    | 11   | 12  | 9    | 10   | 0.90     | 0.574979 | 10   | 9    | 8    | 8    | 8    | 6    | 9    | 6    | 9    | 8    | 1.20     | 0.115665 | 8        | 1.22     | 0.083873 |          |
| 247043_at   | A15f66880 | orexin kinase. 41K (IC 2.7.1.-) (orixS) serine/threonine protein kinase, putative            | 295  | 440  | 538  | 369  | 541  | 351 | 424  | 420  | 1.01     | 0.969512 | 668  | 678  | 500  | 566  | 611  | 596  | 759  | 713  | 615  | 649  | 0.95     | 0.620225 | 591      | 1.04     | 0.702133 |          |
| 247044_at   | A15f66850 | MAP protein kinase : supported by cDNA: serine/threonine protein kinase                      | 84   | 104  | 105  | 124  | 140  | 107 | 98   | 124  | 0.79     | 0.640784 | 63   | 65   | 68   | 92   | 76   | 65   | 79   | 85   | 75   | 65   | 0.99     | 0.050474 | 78       | 0.83     | 0.145320 |          |
| 247045_at   | A15f66930 | putative protein similar to unknown proI expressed protein                                   | 121  | 189  | 228  | 220  | 221  | 188 | 179  | 210  | 0.85     | 0.404470 | 221  | 289  | 229  | 366  | 252  | 282  | 272  | 243  | 247  | 263  | 0.87     | 0.310827 | 300      | 0.82     | 0.252508 |          |
| 247015_at   | A15f66960 | protease-like prolyl oligopeptidase family protein                                           | 84   | 120  | 113  | 130  | 159  | 119 | 106  | 136  | 0.78     | 0.139546 | 87   | 73   | 98   | 109  | 110  | 92   | 110  | 106  | 86   | 106  | 0.82     | 0.030735 | 104      | 0.83     | 0.126384 |          |
| 247016_at   | A15f66970 | putative protein contains similarity to sII signal recognition particle-related / SRP-       | 18   | 18   | 25   | 23   | 26   | 25  | 21   | 24   | 0.84     | 0.167348 | 22   | 22   | 25   | 24   | 19   | 19   | 24   | 22   | 24   | 22   | 1.10     | 0.239012 | 21       | 1.15     | 0.210742 |          |
| 247017_at   | A15f66980 | putative protein similar to unknown droI transcriptional factor B3 family protein            | 11   | 9    | 14   | 10   | 13   | 15  | 11   | 13   | 0.89     | 0.513976 | 9    | 12   | 11   | 15   | 9    | 15   | 10   | 9    | 10   | 11   | 0.90     | 0.577131 | 13       | 0.80     | 0.291463 |          |
| 247018_at   | A15f67000 | AP2 domain transcription factor-like AP2 domain-containing transcription fac                 | 39   | 41   | 46   | 47   | 52   | 46  | 42   | 48   | 0.86     | 0.060314 | 46   | 37   | 42   | 38   | 34   | 42   | 41   | 54   | 42   | 42   | 0.99     | 0.965745 | 38       | 1.10     | 0.362009 |          |
| 247019_at   | A15f67010 | AP2 domain transcription factor-like AP2 domain-containing transcription fac                 | 16   | 21   | 25   | 22   | 25   | 23  | 21   | 23   | 0.89     | 0.421988 | 17   | 18   | 20   | 16   | 19   | 19   | 15   | 17   | 18   | 17   | 1.07     | 0.356970 | 18       | 1.02     | 0.744054 |          |
| 247020_at   | A15f67020 | putative protein strong similarity to unk expressed protein                                  | 65   | 75   | 86   | 97   | 117  | 83  | 75   | 99   | 0.76     | 0.105433 | 85   | 77   | 81   | 99   | 84   | 73   | 101  | 83   | 81   | 88   | 0.92     | 0.373955 | 85       | 0.95     | 0.618699 |          |
| 247021_at   | A15f67040 | putative protein similar to unknown proI hypothetical protein                                | 19   | 21   | 32   | 29   | 28   | 27  | 24   | 28   | 0.86     | 0.405361 | 17   | 22   | 26   | 24   | 15   | 18   | 24   | 22   | 21   | 20   | 1.05     | 0.754384 | 19       | 1.14     | 0.521940 |          |
| 247022_at   | A15f67050 | unknown protein                                                                              | 49   | 77   | 77   | 77   | 89   | 71  | 52   | 79   | 0.66     | 0.010094 | 38   | 42   | 45   | 49   | 50   | 41   | 51   | 53   | 42   | 49   | 0.86     | 0.061782 | 47       | 0.89     | 0.226399 |          |
| 247023_at   | A15f67060 | putative protein similar to unknown droI basic helix-loop-helix (bHLH) family prot           | 26   | 32   | 41   | 36   | 37   | 36  | 33   | 36   | 0.91     | 0.488260 | 20   | 25   | 24   | 20   | 19   | 23   | 34   | 31   | 23   | 25   | 0.90     | 0.577133 | 21       | 1.11     | 0.352043 |          |
| 247024_at   | A15f66985 | Expressed protein : supported by full-length expressed protein                               | 15   | 17   | 20   | 21   | 18   | 21  | 18   | 20   | 0.88     | 0.240899 | 14   | 23   | 17   | 18   | 19   | 17   | 23   | 16   | 18   | 18   | 0.97     | 0.838509 | 18       | 1.00     | 0.997729 |          |
| 247025_at   | A15f67030 | zeaxanthin epoxidase precursor : suoc zeaxanthin epoxidase (ZEP) (ABA1)                      | 144  | 234  | 351  | 273  | 276  | 196 | 243  | 249  | 0.98     | 0.932066 | 194  | 176  | 187  | 326  | 234  | 210  | 273  | 256  | 186  | 260  | 0.71     | 0.031205 | 257      | 0.72     | 0.118570 |          |
| 247026_at   | A15f67080 | protein kinase-like protein                                                                  | 30   | 32   | 35   | 25   | 26   | 24  | 33   | 25   | 1.31     | 0.009415 | 26   | 28   | 34   | 19   | 17   | 17   | 19   | 17   | 29   | 18   | 1.66     | 0.020547 | 18       | 1.67     | 0.007580 |          |
| 247027_at   | A15f67090 | subtilisin-like serine protease that subcellase family protein                               | 25   | 33   | 45   | 41   | 49   | 43  | 34   | 45   | 0.77     | 0.167767 | 34   | 31   | 31   | 37   | 31   | 34   | 38   | 39   | 32   | 36   | 0.90     | 0.154506 | 34       | 0.95     | 0.471223 |          |
| 247028_at   | A15f67100 | DNA polymerase alpha 1 DNA-directed DNA polymerase alpha ca                                  | 243  | 286  | 277  | 321  | 316  | 260 | 269  | 299  | 0.90     | 0.268887 | 198  | 160  | 225  | 258  | 230  | 192  | 222  | 195  | 194  | 219  | 0.89     | 0.283175 | 227      | 0.86     | 0.293408 |          |
| 247029_at   | A15f67190 | TINY-like protein                                                                            | 75   | 121  | 115  | 125  | 131  | 117 | 104  | 124  | 0.83     | 0.241572 | 68   | 70   | 64   | 96   | 87   | 93   | 102  | 93   | 68   | 94   | 0.72     | 0.002043 | 92       | 0.73     | 0.001232 |          |
| 247030_at   | A15f67210 | putative protein similar to unknown droI xenon regulation family protein                     | 26   | 34   | 41   | 44   | 52   | 48  | 34   | 48   | 0.70     | 0.104891 | 26   | 34   | 32   | 39   | 35   | 32   | 46   | 34   | 37   | 37   | 0.82     | 0.127947 | 36       | 0.86     | 0.206781 |          |
| 247031_at   | A15f67220 | UDP-glucosyltransferase-like protein glucosyl transferase family 43 protein                  | 123  | 144  | 154  | 172  | 159  | 130 | 173  | 173  | 0.82     | 0.114743 | 122  | 126  | 133  | 127  | 139  | 143  | 152  | 145  | 150  | 147  | 0.85     | 0.029952 | 157      | 0.81     | 0.070494 |          |
| 247032_at   | A15f67240 | putative protein strong similarity to unk xenoducase family protein                          | 301  | 355  | 394  | 365  | 416  | 318 | 350  | 366  | 0.96     | 0.702361 | 248  | 254  | 258  | 369  | 288  | 264  | 348  | 308  | 253  | 315  | 0.80     | 0.051832 | 307      | 0.82     | 0.167601 |          |
| 247033_at   | A15f67250 | SKP1 interacting partner 2 (SKIP2) (dsc SKP1 interacting partner 2 (SKIP2)                   | 544  | 857  | 864  | 846  | 900  | 635 | 755  | 794  | 0.95     | 0.785693 | 463  | 438  | 488  | 603  | 478  | 439  | 508  | 508  | 462  | 507  | 0.91     | 0.280808 | 507      | 0.91     | 0.436130 |          |
| 247034_at   | A15f67260 | cyclin D3-like protein: supported by full- cyclin family protein                             | 699  | 1036 | 832  | 807  | 906  | 664 | 856  | 792  | 1.08     | 0.626883 | 716  | 736  | 770  | 1110 | 898  | 854  | 939  | 900  | 741  | 940  | 0.79     | 0.016397 | 954      | 0.78     | 0.057085 |          |
| 247035_at   | A15f67110 | putative protein similar to unknown proI basic helix-loop-helix (bHLH) family prot           | 690  | 938  | 832  | 924  | 755  | 856 | 837  | 1.02 | 0.854634 | 778      | 1017 | 907  | 1364 | 953  | 841  | 998  | 924  | 898  | 1036 | 1066 | 0.87     | 0.296639 | 1086     | 0.83     | 0.289503 |          |
| 247036_at   | A15f67130 | putative protein similar to unknown proI M expressed protein                                 | 135  | 463  | 435  | 520  | 560  | 436 | 404  | 505  | 0.80     | 0.158678 | 342  | 375  | 388  | 578  | 385  | 379  | 428  | 421  | 369  | 438  | 0.84     | 0.207450 | 448      | 0.82     | 0.302429 |          |
| 247037_at   | A15f67070 | putative protein contains similarity to unknown droI raoid alkalization factor (RALF) family | 1306 | 1394 | 1273 | 2230 | 2229 | 205 | 1324 | 2158 | 0.61     | 0.000483 | 1553 | 1440 | 1799 | 2761 | 2341 | 2003 | 1832 | 1853 | 1597 | 2158 | 0.74     | 0.063789 | 2369     | 0.67     | 0.034009 |          |
| 247038_at   | A15f67160 | anthranilate N-hydroxycinnamoylbenzyl: transferase family protein                            | 94   | 133  | 134  | 299  | 286  | 242 | 120  | 276  | 0.44     | 0.001967 | 205  | 214  | 229  | 385  | 328  | 320  | 291  | 262  | 216  | 299  | 0.72     | 0.081475 | 315      | 0.69     | 0.090940 |          |
| 247039_at   | A15f67270 | putative protein contains similarity to Al microtubule-associated EB1 family prot            | 263  | 328  | 319  | 332  | 276  | 283 | 309  | 352  | 0.42     | 0.014734 | 249  | 259  | 278  | 402  | 319  | 256  | 270  | 278  | 262  | 305  | 0.94     | 0.016719 | 326      | 0.80     | 0.219329 |          |
| 247040_at   | A15f67150 | anthranilate N-hydroxycinnamoylbenzyl: transferase family protein                            | 179  | 257  | 237  | 440  | 449  | 377 | 238  | 409  | 0.58     | 0.009683 | 207  | 216  | 270  | 426  | 379  | 332  | 406  | 370  | 231  | 383  | 0.60     | 0.001063 | 379      | 0.61     | 0.011400 |          |
| 247041_at   | A15f67180 | floral homeotic protein acetala2-like -si AP2 domain-containing transcription fac            | 63   | 87   | 61   | 231  | 225  | 196 | 71   | 217  | 0.32     | 0.000430 | 54   | 62   | 72   | 216  | 146  | 113  | 118  | 63   | 141  | 0.44 | 0.026462 | 159      | 0.39     | 0.036551 |          |          |
| 247042_at   | A15f67220 | putative protein similar to unknown droI nitrogen regulation family protein                  | 444  | 546  | 545  | 544  | 663  | 474 | 512  | 560  | 0.91     | 0.494599 | 460  | 489  | 504  | 663  | 545  | 502  | 511  | 484  | 484  | 541  | 0.89     | 0.239554 | 570      | 0.85     | 0.195927 |          |
| 246983_at   | A15f67200 | receptor protein kinase-like protein : s. leucine-rich repeat transmembrane prot             | 282  | 344  | 318  | 412  | 461  | 350 | 314  | 408  | 0.77     | 0.004086 | 249  | 229  | 275  | 437  | 304  | 264  | 306  | 310  | 251  | 324  | 0.74     | 0.118253 | 335      | 0.75     | 0.193104 |          |
| 246984_at   | A15f67310 | cyclochrome P450                                                                             | 67   | 61   | 70   | 61   | 76   | 70  | 74   | 61   | 0.94     | 0.505116 | 48   | 61   | 70   | 63   | 62   | 50   | 73   | 63   | 48   | 70   | 1.01     | 0.853071 | 62       | 1.17     | 0.411050 |          |
| 246985_at   | A15f67290 | putative protein contains similarity to unk FAD-dependent oxidoreductase family p            | 99   | 129  | 139  | 137  | 144  | 122 | 122  | 134  | 0.91     | 0.425920 | 109  | 117  | 122  | 165  | 119  | 114  | 148  | 134  | 116  | 136  | 0.85     | 0.171372 | 132      | 0.88     | 0.381016 |          |
| 246986_at   | A15f67280 | receptor-like protein kinase : supported leucine-rich repeat transmembrane prot              | 818  | 770  | 769  | 999  | 1134 | 829 | 752  | 987  | 0.76     | 0.058749 | 561  | 509  | 691  | 900  | 755  | 576  | 715  | 709  | 587  | 731  | 0.80     | 0.120844 | 744      | 0.79     | 0.220635 |          |
| 246987_at   | A15f67300 | mV-related protein. 33.3K (for IS7128 cytochrome P450 family protein                         | 722  | 752  | 765  | 1039 | 1250 | 714 | 846  | 1001 | 0.85     | 0.408066 | 1165 | 1437 | 917  | 1674 | 1123 | 1253 | 1425 | 1381 | 1173 | 1371 | 0.86     | 0.274373 | 1350     | 0.87     | 0.473621 |          |
| 246988_at   | A15f67320 | putative protein strong similarity to unk aramidolipase-catalyzed repeat family o            | 22   | 23   | 26   | 31   | 27   | 26  | 27   | 23   | 0.96     | 0.813636 | 29   | 28   | 32   | 29   | 21   | 29   | 28   | 27   | 28   | 29   | 1.33     | 0.018903 | 20       | 1.43     | 0.013924 |          |
| 246989_at   | A15f67350 | unknown protein                                                                              | 153  | 212  | 198  | 176  | 217  | 178 | 188  | 190  | 0.99     | 0.916936 | 79   | 62   | 83   | 133  | 92   | 76   | 77</ |      |      |      |          |          |          |          |          |          |

|             |           |                                                                                     |     |     |     |     |      |     |     |     |      |          |     |     |     |      |      |     |      |     |     |      |      |          |          |      |          |          |
|-------------|-----------|-------------------------------------------------------------------------------------|-----|-----|-----|-----|------|-----|-----|-----|------|----------|-----|-----|-----|------|------|-----|------|-----|-----|------|------|----------|----------|------|----------|----------|
| 246973_at   | A15g24970 | putative protein UBIQUINONE BIOSY A1C1 family protein                               | 154 | 180 | 190 | 219 | 223  | 189 | 175 | 210 | 0.83 | 0.080525 | 136 | 107 | 169 | 176  | 171  | 140 | 171  | 171 | 137 | 166  | 0.83 | 0.117401 | 162      | 0.84 | 0.289513 |          |
| 246974_at   | A15g24980 | putative protein                                                                    | 19  | 19  | 30  | 25  | 35   | 22  | 23  | 27  | 0.83 | 0.429547 | 26  | 28  | 23  | 25   | 26   | 19  | 27   | 24  | 25  | 24   | 1.05 | 0.572395 | 23       | 1.10 | 0.451106 |          |
| 246975_at   | A15g24990 | outative protein hvchothelial proteins -, expressed protein                         | 341 | 568 | 573 | 359 | 395  | 300 | 494 | 351 | 1.41 | 0.155004 | 286 | 311 | 274 | 323  | 280  | 311 | 278  | 302 | 290 | 299  | 0.97 | 0.570883 | 303      | 0.95 | 0.444286 |          |
| 246976_s_at | A15g24990 | putative protein UBIQUINONE BIOSY A1C1 family protein                               | 240 | 568 | 573 | 359 | 395  | 300 | 494 | 351 | 1.41 | 0.155004 | 286 | 311 | 274 | 323  | 280  | 311 | 278  | 302 | 290 | 299  | 0.97 | 0.570883 | 303      | 0.95 | 0.444286 |          |
| 246977_at   | A15g24990 | outative protein UBIQUINONE BIOSY A1C1 family protein                               | 240 | 568 | 573 | 359 | 395  | 300 | 494 | 351 | 1.41 | 0.155004 | 286 | 311 | 274 | 323  | 280  | 311 | 278  | 302 | 290 | 299  | 0.97 | 0.570883 | 303      | 0.95 | 0.444286 |          |
| 246978_at   | A15g24990 | outative protein UBIQUINONE BIOSY A1C1 family protein                               | 240 | 568 | 573 | 359 | 395  | 300 | 494 | 351 | 1.41 | 0.155004 | 286 | 311 | 274 | 323  | 280  | 311 | 278  | 302 | 290 | 299  | 0.97 | 0.570883 | 303      | 0.95 | 0.444286 |          |
| 246979_s_at | A15g25010 | putative protein hvchothelial proteins -, expressed protein                         | 48  | 117 | 184 | 48  | 49   | 37  | 129 | 45  | 2.90 | 0.043015 | 119 | 139 | 86  | 97   | 112  | 95  | 166  | 154 | 115 | 125  | 0.92 | 0.669747 | 101      | 1.13 | 0.468201 |          |
| 246980_s_at | A15g25010 | putative protein hvchothelial proteins -, expressed protein                         | 48  | 117 | 184 | 48  | 49   | 37  | 129 | 45  | 2.90 | 0.043015 | 119 | 139 | 86  | 97   | 112  | 95  | 166  | 154 | 115 | 125  | 0.92 | 0.669747 | 101      | 1.13 | 0.468201 |          |
| 246981_s_at | A15g25010 | putative protein hvchothelial proteins -, expressed protein                         | 48  | 117 | 184 | 48  | 49   | 37  | 129 | 45  | 2.90 | 0.043015 | 119 | 139 | 86  | 97   | 112  | 95  | 166  | 154 | 115 | 125  | 0.92 | 0.669747 | 101      | 1.13 | 0.468201 |          |
| 246982_s_at | A15g25010 | putative protein hvchothelial proteins -, expressed protein                         | 48  | 117 | 184 | 48  | 49   | 37  | 129 | 45  | 2.90 | 0.043015 | 119 | 139 | 86  | 97   | 112  | 95  | 166  | 154 | 115 | 125  | 0.92 | 0.669747 | 101      | 1.13 | 0.468201 |          |
| 246983_s_at | A15g25010 | putative protein hvchothelial proteins -, expressed protein                         | 48  | 117 | 184 | 48  | 49   | 37  | 129 | 45  | 2.90 | 0.043015 | 119 | 139 | 86  | 97   | 112  | 95  | 166  | 154 | 115 | 125  | 0.92 | 0.669747 | 101      | 1.13 | 0.468201 |          |
| 246984_at   | A15g25070 | putative protein                                                                    | 124 | 158 | 159 | 171 | 201  | 151 | 147 | 175 | 0.84 | 0.212172 | 120 | 96  | 112 | 143  | 126  | 107 | 128  | 126 | 109 | 126  | 0.87 | 0.121884 | 125      | 0.87 | 0.275347 |          |
| 246947_at   | A15g25120 | cytochrome P450-like protein CYTOC1 cytochrome P450-like protein CYTOCH             | 19  | 19  | 30  | 29  | 30   | 23  | 30  | 23  | 0.75 | 0.120000 | 16  | 15  | 20  | 20   | 17   | 17  | 17   | 17  | 17  | 17   | 18   | 0.96     | 0.603386 | 18   | 0.95     | 0.633497 |
| 246948_at   | A15g25130 | cytochrome P450-like protein CYTOC1 cytochrome P450 family protein                  | 4   | 5   | 3   | 3   | 2    | 4   | 2   | 4   | 1.21 | 0.641029 | 4   | 4   | 3   | 1    | 7    | 2   | 4    | 3   | 4   | 3    | 1.10 | 0.811712 | 3        | 1.15 | 0.805284 |          |
| 246949_at   | A15g25140 | cytochrome P450-like protein CYTOC1 cytochrome P450 family protein                  | 4   | 5   | 3   | 3   | 2    | 4   | 2   | 4   | 1.21 | 0.641029 | 4   | 4   | 3   | 1    | 7    | 2   | 4    | 3   | 4   | 3    | 1.10 | 0.811712 | 3        | 1.15 | 0.805284 |          |
| 246950_at   | A15g25150 | transcription initiation factor IID-associ transducin family protein / WD-40 repeat | 17  | 237 | 239 | 239 | 276  | 204 | 218 | 240 | 0.91 | 0.493298 | 164 | 164 | 172 | 231  | 189  | 160 | 205  | 204 | 166 | 198  | 0.84 | 0.095008 | 193      | 0.86 | 0.272828 |          |
| 246920_at   | A15g25090 | phytoactinin-related protein-like phyto plastocyanin-like domain-containing prot    | 295 | 313 | 283 | 368 | 399  | 346 | 297 | 371 | 0.80 | 0.013639 | 330 | 333 | 411 | 492  | 433  | 387 | 369  | 326 | 358 | 401  | 0.89 | 0.348285 | 437      | 0.82 | 0.120044 |          |
| 246921_at   | A15g25080 | putative protein small unique nuclear r-like protein                                | 112 | 154 | 158 | 156 | 174  | 143 | 143 | 141 | 0.58 | 0.397650 | 157 | 203 | 175 | 262  | 189  | 191 | 183  | 173 | 178 | 199  | 0.89 | 0.397155 | 214      | 0.83 | 0.264222 |          |
| 246922_at   | A15g25110 | serine/threonine protein kinase-like oru CBL-interaction protein kinase Z5 CIPK     | 81  | 87  | 138 | 107 | 119  | 97  | 102 | 108 | 0.95 | 0.779089 | 71  | 78  | 93  | 69   | 71   | 70  | 89   | 75  | 80  | 75   | 1.07 | 0.458609 | 70       | 1.15 | 0.186877 |          |
| 246923_at   | A15g25100 | putative protein hvchothelial proteins -, expressed protein                         | 756 | 790 | 743 | 921 | 1025 | 756 | 753 | 901 | 0.85 | 0.158802 | 653 | 506 | 539 | 782  | 760  | 617 | 691  | 679 | 599 | 706  | 0.85 | 0.088401 | 720      | 0.83 | 0.159672 |          |
| 246924_at   | A15g25060 | outative protein KAA0332 - Homo sau RNA recognition motif (RRM)-containing          | 189 | 246 | 243 | 258 | 286  | 227 | 226 | 257 | 0.88 | 0.283953 | 181 | 138 | 200 | 217  | 197  | 150 | 186  | 177 | 173 | 185  | 0.93 | 0.561222 | 188      | 0.92 | 0.606390 |          |
| 246925_at   | A15g25180 | cytochrome P450 7B1 - like protein cytochrome P450 7B1A1, putative (CYP             | 17  | 26  | 32  | 44  | 24   | 36  | 25  | 35  | 0.71 | 0.239355 | 21  | 21  | 42  | 18   | 14   | 18  | 24   | 18  | 28  | 18   | 1.51 | 0.139503 | 17       | 1.66 | 0.196634 |          |
| 246926_at   | A15g25240 | putative protein                                                                    | 95  | 99  | 129 | 116 | 114  | 108 | 108 | 113 | 0.96 | 0.679292 | 98  | 95  | 95  | 97   | 89   | 73  | 105  | 100 | 93  | 93   | 1.00 | 0.980439 | 87       | 1.08 | 0.418178 |          |
| 246927_s_at | A15g25260 | nuclein - like protein nodulin, Glycine r expressed protein // expressed protein    | 5   | 4   | 7   | 6   | 8    | 9   | 5   | 7   | 0.75 | 0.204056 | 5   | 6   | 8   | 7    | 6    | 6   | 4    | 7   | 6   | 6    | 1.07 | 0.640118 | 6        | 1.01 | 0.914956 |          |
| 246928_at   | A15g25270 | outative protein ScvHe protein - Xenoc expressed protein                            | 248 | 347 | 346 | 335 | 419  | 311 | 314 | 355 | 0.88 | 0.422913 | 201 | 207 | 201 | 227  | 203  | 189 | 242  | 234 | 203 | 219  | 0.93 | 0.277284 | 206      | 0.98 | 0.784322 |          |
| 246929_at   | A15g25210 | outative protein : supported by full-lenq expressed protein                         | 25  | 39  | 40  | 39  | 42   | 32  | 35  | 38  | 0.92 | 0.638845 | 45  | 68  | 46  | 57   | 42   | 51  | 65   | 55  | 53  | 54   | 0.98 | 0.884567 | 50       | 1.06 | 0.755021 |          |
| 246930_at   | A15g25220 | KNA13 homeodomain protein - support homeobox protein knotted-1 like 3 (KNA          | 262 | 364 | 414 | 387 | 445  | 339 | 347 | 390 | 0.89 | 0.484095 | 377 | 473 | 425 | 538  | 406  | 414 | 492  | 445 | 425 | 459  | 0.93 | 0.417376 | 462      | 0.94 | 0.618718 |          |
| 246931_at   | A15g25170 | putative protein apoptosis-related prot expressed protein                           | 89  | 85  | 101 | 165 | 168  | 137 | 98  | 157 | 0.63 | 0.018331 | 116 | 119 | 110 | 237  | 133  | 169 | 171  | 165 | 115 | 175  | 0.66 | 0.039156 | 180      | 0.64 | 0.102143 |          |
| 246932_at   | A15g25190 | ethylene-responsive element - like prot ethylene-responsive element-binding or      | 54  | 69  | 82  | 81  | 80   | 82  | 68  | 81  | 0.84 | 0.205864 | 76  | 89  | 79  | 98   | 76   | 81  | 95   | 102 | 81  | 90   | 0.90 | 0.260721 | 85       | 0.96 | 0.657314 |          |
| 246933_at   | A15g25160 | ZFP3 zinc finger protein : supported b ZFP3 zinc finger protein : supported by      | 13  | 14  | 22  | 16  | 20   | 22  | 16  | 19  | 0.85 | 0.431065 | 16  | 15  | 14  | 19   | 13   | 13  | 17   | 14  | 15  | 15   | 1.01 | 0.962674 | 15       | 1.01 | 0.932772 |          |
| 246934_at   | A15g25290 | outative protein several hvchothelial or F-box family protein                       | 31  | 37  | 38  | 35  | 35   | 37  | 36  | 36  | 1.00 | 0.979215 | 25  | 36  | 31  | 28   | 29   | 37  | 33   | 29  | 30  | 29   | 1.04 | 0.662361 | 28       | 1.09 | 0.517432 |          |
| 246935_at   | A15g25350 | leucine-rich repeats containing protein - F-box family protein                      | 157 | 194 | 216 | 209 | 229  | 229 | 189 | 222 | 0.85 | 0.146318 | 115 | 97  | 113 | 113  | 105  | 91  | 116  | 119 | 108 | 109  | 0.99 | 0.918065 | 103      | 1.05 | 0.597621 |          |
| 246936_at   | A15g25360 | outative protein hvchothelial proteins -, expressed protein                         | 167 | 212 | 270 | 274 | 223  | 209 | 245 | 245 | 0.87 | 0.256232 | 224 | 209 | 245 | 245  | 245  | 245 | 245  | 245 | 245 | 245  | 0.82 | 0.173481 | 245      | 0.84 | 0.247363 |          |
| 246937_at   | A15g25370 | phospholipase D1-like protein phospholipase D, putative (PLDZETA)                   | 34  | 32  | 40  | 47  | 56   | 42  | 35  | 48  | 0.75 | 0.048189 | 26  | 29  | 33  | 45   | 36   | 28  | 37   | 35  | 29  | 36   | 0.80 | 0.123420 | 36       | 0.80 | 0.254579 |          |
| 246938_at   | A15g25380 | cyclin 3a cyclin 3a (CYC3a)                                                         | 16  | 20  | 18  | 21  | 21   | 21  | 24  | 18  | 0.22 | 0.037549 | 16  | 15  | 16  | 24   | 20   | 17  | 18   | 16  | 16  | 19   | 0.82 | 0.109924 | 20       | 0.78 | 0.107132 |          |
| 246939_at   | A15g25390 | AP2 domain containing protein AP2 de AP2 domain-containing transcription fac        | 71  | 90  | 110 | 114 | 116  | 113 | 90  | 114 | 0.79 | 0.095297 | 88  | 78  | 105 | 103  | 108  | 101 | 78   | 95  | 90  | 97   | 0.93 | 0.475449 | 104      | 0.87 | 0.160954 |          |
| 246940_at   | A15g25400 | outative protein phospho-D-cholesterol phosphate translocator-related               | 55  | 72  | 83  | 49  | 48   | 55  | 60  | 70  | 0.52 | 0.130411 | 59  | 60  | 70  | 49   | 29   | 34  | 44   | 40  | 63  | 37   | 1.68 | 0.035804 | 34       | 1.82 | 0.004940 |          |
| 246941_at   | A15g25415 | outative protein several hvchothelial or hvchothelial protein                       | 24  | 24  | 39  | 27  | 26   | 28  | 29  | 27  | 1.00 | 0.660324 | 26  | 21  | 27  | 22   | 19   | 19  | 24   | 22  | 25  | 21   | 1.16 | 0.152438 | 20       | 1.23 | 0.114589 |          |
| 246942_at   | A15g25430 | anion exchanger-like protein chloride-t anion exchange protein family               | 17  | 16  | 25  | 23  | 21   | 20  | 19  | 21  | 0.91 | 0.546720 | 17  | 13  | 19  | 18   | 14   | 17  | 20   | 19  | 16  | 17   | 0.94 | 0.551562 | 16       | 1.01 | 0.952607 |          |
| 246943_at   | A15g25440 | putative protein kinase serine/threonine protein kinase family protein              | 34  | 34  | 39  | 36  | 40   | 35  | 36  | 37  | 0.97 | 0.656429 | 38  | 48  | 47  | 33   | 30   | 27  | 37   | 33  | 34  | 32   | 1.39 | 0.006678 | 30       | 1.47 | 0.014634 |          |
| 246944_at   | A15g25450 | ubiquitin-cytochrome-c reductase-like ubiquitin-cytochrome-c reductase cont         | 39  | 148 | 150 | 175 | 346  | 189 | 143 | 238 | 0.56 | 0.166888 | 165 | 188 | 193 | 189  | 152  | 148 | 138  | 139 | 162 | 153  | 1.08 | 0.081141 | 163      | 1.12 | 0.265068 |          |
| 246945_at   | A15g25280 | serine-rich protein - supported by full-lenq serine-rich protein-related            | 394 | 596 | 603 | 567 | 602  | 472 | 531 | 547 | 0.97 | 0.848625 | 719 | 801 | 643 | 997  | 742  | 820 | 824  | 850 | 721 | 847  | 0.85 | 0.100596 | 853      | 0.85 | 0.208249 |          |
| 246918_at   | A15g25340 | outative protein hvchothelial protein F1 expressed protein                          | 71  | 68  | 86  | 80  | 85   | 82  | 75  | 83  | 0.91 | 0.252532 | 50  | 55  | 67  | 55   | 46   | 52  | 52   | 49  | 58  | 51   | 1.13 | 0.165789 | 51       | 1.12 | 0.331751 |          |
| 246919_at   | A15g25460 | outative protein hvchothelial protein - F1 expressed protein                        | 581 | 739 | 563 | 857 | 918  | 728 | 628 | 834 | 0.75 | 0.059536 | 770 | 868 | 828 | 1371 | 1064 | 976 | 1143 | 997 | 822 | 1110 | 0.74 | 0.025238 | 1137     | 0.72 | 0.062437 |          |
| 246889_at   | A15g25470 | outative protein various predicted orot expressed protein                           | 293 | 388 | 456 | 438 | 498  | 361 | 379 | 432 | 0.88 | 0.437870 | 377 | 387 | 401 | 590  | 476  | 474 | 484  | 480 | 388 | 573  | 0.77 | 0.008563 | 513      | 0.76 | 0.032813 |          |
| 246890_at   | A15g25410 | Expressed protein - supported by cDNA expressed protein                             | 36  | 39  | 34  | 37  | 36   | 39  | 34  | 41  | 0.82 | 0.252622 | 20  | 14  | 15  | 17   | 18   | 22  | 22   | 20  | 14  | 20   | 0.88 | 0.339584 | 20       | 0.84 | 0.247363 |          |
| 246891_at   | A15g25490 | putative protein various predicted prot zinc finger (Ran-binding) family protein    | 66  | 118 | 98  | 101 | 114  | 86  | 94  | 100 | 0.94 | 0.721999 | 92  | 108 | 101 | 124  | 92   | 108 | 81   | 88  | 82  | 100  | 0.92 | 1.09     | 0.507245 | 97   | 1.03     | 0.842139 |
| 246892_at   | A15g25500 | putative protein predicted protein, Orv expressed protein                           | 111 | 136 | 161 | 164 | 182  | 145 | 136 | 163 | 0.83 | 0.201869 | 102 | 83  | 112 | 131  | 112  | 110 | 125  | 118 | 99  | 119  | 0.83 | 0.045918 | 118      | 0.84 | 0.153    |          |

|           |           |                                           |                                                 |      |      |      |      |      |      |      |      |          |          |     |     |     |      |      |     |      |      |     |      |          |          |          |          |          |          |
|-----------|-----------|-------------------------------------------|-------------------------------------------------|------|------|------|------|------|------|------|------|----------|----------|-----|-----|-----|------|------|-----|------|------|-----|------|----------|----------|----------|----------|----------|----------|
| 246886_at | A15g26240 | CLC-d chloride channel protein            | chloride channel protein (CLC-d)                | 115  | 148  | 150  | 173  | 182  | 149  | 138  | 168  | 0.82     | 0.114110 | 115 | 115 | 115 | 140  | 112  | 102 | 140  | 121  | 115 | 123  | 0.93     | 0.442114 | 118      | 0.97     | 0.778214 |          |
| 246887_at | A15g26250 | hexose transporter - like protein hexos   | sugar transporter, putative                     | 117  | 159  | 200  | 60   | 66   | 56   | 159  | 61   | 2.62     | 0.015475 | 140 | 167 | 130 | 34   | 34   | 36  | 44   | 35   | 146 | 37   | 3.99     | 0.000013 | 35       | 4.20     | 0.000567 |          |
| 246888_at | A15g26270 | putative protein                          | expressed protein                               | 57   | 61   | 84   | 78   | 86   | 80   | 67   | 81   | 0.83     | 0.184039 | 54  | 48  | 61  | 57   | 41   | 62  | 82   | 64   | 54  | 62   | 0.88     | 0.424004 | 54       | 1.00     | 0.988410 |          |
| 246889_at | A15g26280 | mitochondrial carrier - like protein      | mitochondrial substrate carrier family-corr     | 39   | 46   | 39   | 46   | 47   | 47   | 46   | 1.01 | 0.01973  | 37       | 37  | 45  | 41  | 36   | 41   | 36  | 41   | 36   | 37  | 0.99 | 0.896917 | 36       | 0.97     | 0.981207 |          |          |
| 246890_at | A15g26290 | putative protein various predicted prot   | myc and TRAF homolog domain-corr                | 12   | 7    | 10   | 14   | 15   | 13   | 10   | 14   | 0.68     | 0.051976 | 4   | 11  | 11  | 11   | 7    | 9   | 12   | 12   | 9   | 10   | 0.88     | 0.602834 | 9        | 1.01     | 0.986914 |          |
| 246891_at | A15g26210 | nucleic acid binding protein - like nucle | PHD finger family protein                       | 570  | 703  | 721  | 765  | 817  | 659  | 665  | 747  | 0.89     | 0.284879 | 674 | 789 | 739 | 964  | 751  | 754 | 661  | 675  | 734 | 761  | 0.96     | 0.735457 | 823      | 0.89     | 0.317915 |          |
| 246892_at | A15g26260 | putative protein various predicted prot   | myc and TRAF homolog domain-corr                | 16   | 22   | 25   | 27   | 28   | 20   | 21   | 25   | 0.83     | 0.300753 | 16  | 16  | 13  | 14   | 13   | 12  | 21   | 22   | 15  | 16   | 0.93     | 0.899466 | 13       | 1.18     | 0.096122 |          |
| 246893_at | A15g26310 | UTP-glucose 6-phosphate-UTP-glucose       | transferase                                     | 20   | 31   | 29   | 50   | 40   | 32   | 20   | 40   | 0.65     | 0.081202 | 23  | 20  | 27  | 26   | 27   | 25  | 52   | 44   | 27  | 50   | 0.87     | 0.023199 | 64       | 0.42     | 0.000469 |          |
| 246894_at | A15g26330 | cooper binding - like protein mavin       | plastocyanin-like domain-containing prot        | 23   | 28   | 32   | 30   | 37   | 32   | 20   | 32   | 0.85     | 0.217330 | 19  | 20  | 17  | 23   | 24   | 21  | 22   | 19   | 22  | 22   | 0.86     | 0.048920 | 22       | 0.84     | 0.107419 |          |
| 246895_at | A15g26350 | putative protein hydrovathelial protein   | P hydrovathelial protein                        | 22   | 24   | 31   | 35   | 34   | 26   | 33   | 26   | 0.77     | 0.051289 | 20  | 22  | 24  | 24   | 24   | 23  | 22   | 15   | 22  | 22   | 0.99     | 0.931752 | 24       | 0.90     | 0.115719 |          |
| 246896_at | A15g26370 | putative protein ovruvate water dikinas   | aliphosic hydrolase starch-binding dom          | 398  | 581  | 612  | 564  | 762  | 518  | 530  | 615  | 0.86     | 0.444664 | 454 | 424 | 435 | 480  | 466  | 423 | 588  | 544  | 438 | 500  | 0.87     | 0.164891 | 456      | 0.96     | 0.387871 |          |
| 246897_at | A15g26380 | chalconerin gamma chain - like protein    | chalconerin, putative                           | 686  | 804  | 745  | 873  | 892  | 810  | 745  | 859  | 0.87     | 0.042687 | 637 | 576 | 676 | 762  | 666  | 627 | 634  | 617  | 630 | 641  | 0.98     | 0.835625 | 652      | 0.97     | 0.780380 |          |
| 246898_at | A15g26340 | hexose transporter - like protein hexos   | hexose transporter, putative                    | 53   | 61   | 128  | 49   | 47   | 38   | 90   | 44   | 2.02     | 0.074891 | 92  | 92  | 92  | 64   | 60   | 63  | 105  | 96   | 92  | 77   | 1.19     | 0.300042 | 82       | 1.45     | 0.000028 |          |
| 246899_at | A15g26595 | putative protein isopenicillin N epimer   | expressed protein                               | 245  | 367  | 384  | 424  | 484  | 412  | 332  | 440  | 0.75     | 0.092325 | 205 | 220 | 254 | 318  | 274  | 252 | 306  | 270  | 226 | 284  | 0.80     | 0.023772 | 282      | 0.80     | 0.082915 |          |
| 246900_at | A15g26615 | putative protein                          | hypothetical protein                            | 7    | 9    | 6    | 7    | 8    | 11   | 8    | 9    | 0.85     | 0.414456 | 6   | 20  | 9   | 7    | 5    | 8   | 8    | 9    | 12  | 7    | 1.60     | 0.220150 | 7        | 1.76     | 0.309640 |          |
| 246901_at | A15g26625 | putative protein homeotic protein bnf1    | MADS-box protein (AGL35)                        | 35   | 34   | 46   | 45   | 49   | 43   | 38   | 46   | 0.84     | 0.196554 | 31  | 33  | 39  | 26   | 32   | 29  | 43   | 29   | 34  | 32   | 1.07     | 0.848564 | 29       | 1.17     | 0.180247 |          |
| 246902_at | A15g26635 | putative protein various predicted prot   | expressed protein                               | 32   | 43   | 45   | 47   | 56   | 40   | 48   | 0.84 | 0.270496 | 34       | 32  | 34  | 31  | 29   | 24   | 31  | 29   | 33   | 29  | 1.15 | 0.055980 | 28       | 1.18     | 0.083518 |          |          |
| 246903_at | A15g26645 | putative protein MADS box protein AG      | MADS-box protein (AGL36) /// MADS-bc            | 20   | 11   | 18   | 15   | 13   | 15   | 16   | 14   | 1.13     | 0.512370 | 10  | 10  | 14  | 10   | 14   | 14  | 14   | 12   | 11  | 12   | 0.94     | 0.667456 | 11       | 1.01     | 0.972707 |          |
| 246904_at | A15g26665 | pectin acetyltransferase precursor - like | p-pectinacetyltransferase, putative             | 102  | 128  | 103  | 143  | 129  | 103  | 111  | 125  | 0.89     | 0.380775 | 96  | 92  | 113 | 118  | 102  | 122 | 72   | 95   | 91  | 100  | 0.96     | 1.05     | 0.672964 | 97       | 1.03     | 0.835175 |
| 246905_at | A15g26675 | flap endonuclease - like protein cseH     | endonuclease, putative                          | 167  | 208  | 206  | 238  | 224  | 214  | 192  | 225  | 0.85     | 0.074288 | 159 | 166 | 193 | 222  | 187  | 168 | 155  | 157  | 173 | 178  | 0.97     | 0.785310 | 192      | 0.90     | 0.358846 |          |
| 246906_at | A15g26718 | putative protein                          | expressed protein                               | 132  | 180  | 197  | 211  | 194  | 170  | 211  | 0.80 | 0.130802 | 133      | 117 | 135 | 200 | 157  | 156  | 168 | 140  | 129  | 164 | 0.78 | 0.042546 | 171      | 0.75     | 0.052859 |          |          |
| 246907_at | A15g26605 | putative protein - supported by full-len  | D111G-atch domain-containing protein            | 307  | 410  | 419  | 372  | 471  | 360  | 379  | 401  | 0.94     | 0.881942 | 460 | 473 | 445 | 674  | 515  | 502 | 507  | 505  | 459 | 540  | 0.85     | 0.120235 | 564      | 0.81     | 0.134586 |          |
| 246908_at | A15g26696 | nectarin - like protein nectarin 1        | orecutt germin-like protein, putative           | 91   | 57   | 73   | 48   | 66   | 32   | 74   | 49   | 1.52     | 0.142973 | 46  | 54  | 49  | 54   | 27   | 57  | 37   | 39   | 41  | 50   | 40       | 1.25     | 0.144646 | 40       | 1.26     | 0.277424 |
| 246909_at | A15g26731 | Excessed protein - supported by full-le   | expressed protein                               | 182  | 218  | 224  | 300  | 354  | 266  | 208  | 307  | 0.68     | 0.026272 | 210 | 200 | 207 | 352  | 341  | 330 | 293  | 283  | 206 | 320  | 0.64     | 0.000741 | 341      | 0.60     | 0.000042 |          |
| 246910_at | A15g26734 | putative protein various predicted prot   | expressed protein                               | 452  | 556  | 699  | 508  | 558  | 413  | 569  | 493  | 1.15     | 0.415157 | 477 | 464 | 473 | 662  | 535  | 505 | 567  | 560  | 471 | 566  | 0.83     | 0.035981 | 568      | 0.83     | 0.115695 |          |
| 246911_at | A15g26655 | transcription factor ATMYB4 - support     | myb family transcription factor (MYB4) ///      | 22   | 25   | 23   | 26   | 25   | 25   | 23   | 26   | 0.90     | 0.060597 | 18  | 19  | 14  | 21   | 22   | 22  | 20   | 102  | 83  | 75   | 0.97     | 0.375569 | 51       | 0.95     | 0.621874 |          |
| 246912_at | A15g26707 | glutamy-IRNA synthetase - supported       | glutamate-IRNA liase, putative /// glutam       | 1021 | 1153 | 1089 | 1322 | 1403 | 1118 | 1088 | 1281 | 0.85     | 0.106276 | 873 | 728 | 902 | 1192 | 1060 | 854 | 1003 | 968  | 834 | 1015 | 0.82     | 0.073969 | 1035     | 0.81     | 0.147116 |          |
| 246913_at | A15g26760 | putative protein                          | expressed protein                               | 347  | 443  | 438  | 450  | 565  | 415  | 409  | 477  | 0.86     | 0.286787 | 284 | 245 | 328 | 355  | 320  | 272 | 311  | 292  | 285 | 310  | 0.92     | 0.373818 | 316      | 0.90     | 0.424804 |          |
| 246914_at | A15g26820 | putative protein ferrocortin1 - Mus mus   | ferrocortin-related                             | 253  | 441  | 373  | 347  | 417  | 311  | 356  | 358  | 0.99     | 0.965399 | 340 | 334 | 351 | 476  | 309  | 343 | 414  | 394  | 342 | 405  | 0.94     | 0.470537 | 405      | 0.84     | 0.176755 |          |
| 246915_at | A15g26840 | putative protein                          | hypothetical protein                            | 27   | 30   | 45   | 45   | 45   | 27   | 30   | 45   | 0.96     | 0.195699 | 19  | 21  | 27  | 28   | 24   | 27  | 24   | 23   | 24  | 27   | 0.91     | 0.302001 | 27       | 0.95     | 0.633546 |          |
| 246916_at | A15g26850 | putative protein various predicted prot   | expressed protein                               | 1156 | 1458 | 1302 | 1628 | 1780 | 1206 | 1305 | 1538 | 0.85     | 0.293557 | 924 | 819 | 926 | 1300 | 1071 | 944 | 1186 | 1125 | 890 | 1117 | 0.80     | 0.046439 | 1091     | 0.81     | 0.167438 |          |
| 246917_at | A15g26860 | Lon protease homolog 2 precursor          | airL Lon protease homolog 2, mitochondrial      | 190  | 197  | 183  | 252  | 272  | 207  | 187  | 244  | 0.77     | 0.045998 | 153 | 109 | 170 | 193  | 181  | 144 | 167  | 162  | 144 | 169  | 0.85     | 0.191331 | 173      | 0.83     | 0.288533 |          |
| 246918_at | A15g26870 | putative protein various predicted prot   | MADS-box family protein /// MADS-box I          | 9    | 15   | 14   | 10   | 11   | 12   | 12   | 17   | 1.11     | 0.569966 | 6   | 11  | 10  | 10   | 9    | 11  | 11   | 8    | 9   | 10   | 0.94     | 0.643216 | 10       | 0.91     | 0.588407 |          |
| 246919_at | A15g26890 | putative protein various predicted prot   | RNA-IRNA methyltransferase (SocU) fa            | 306  | 468  | 477  | 393  | 498  | 388  | 417  | 426  | 0.98     | 0.893096 | 508 | 603 | 511 | 659  | 529  | 545 | 523  | 499  | 540 | 551  | 0.98     | 0.803501 | 577      | 0.93     | 0.077772 |          |
| 246920_at | A15g26890 | putative protein                          | hypothetical protein                            | 32   | 27   | 62   | 52   | 48   | 45   | 40   | 48   | 0.83     | 0.502227 | 27  | 30  | 31  | 25   | 20   | 24  | 37   | 28   | 29  | 27   | 1.09     | 0.562997 | 23       | 1.26     | 0.028151 |          |
| 246921_at | A15g26900 | WD-repeat protein - like WD-repeat        | on WD-40 repeat family protein /// transduc     | 5    | 4    | 5    | 4    | 3    | 8    | 5    | 5    | 0.93     | 0.822513 | 8   | 11  | 8   | 5    | 15   | 3   | 5    | 7    | 7   | 8    | 1.24     | 0.561891 | 8        | 1.19     | 0.725246 |          |
| 246922_at | A15g26910 | putative protein predicted proteins       | As expressed protein                            | 236  | 323  | 326  | 315  | 377  | 235  | 295  | 309  | 0.96     | 0.798460 | 215 | 193 | 191 | 249  | 210  | 189 | 265  | 233  | 200 | 229  | 0.87     | 0.189339 | 216      | 0.92     | 0.443565 |          |
| 246923_at | A15g26920 | calmodulin-binding - like protein calmo   | calmodulin-binding protein                      | 30   | 32   | 46   | 49   | 45   | 34   | 36   | 43   | 0.84     | 0.49     | 31  | 34  | 32  | 29   | 25   | 33  | 27   | 32   | 28  | 1    | 0.4      | 0.061490 | 26       | 1.22     | 0.023226 |          |
| 246924_at | A15g26960 | putative protein predicted proteins       | As kelch repeat-containing F-box family pro     | 261  | 345  | 356  | 364  | 410  | 333  | 322  | 369  | 0.87     | 0.276754 | 261 | 244 | 264 | 340  | 265  | 340 | 253  | 239  | 257 | 317  | 0.81     | 0.031280 | 306      | 0.84     | 0.124084 |          |
| 246925_at | A15g26970 | putative protein                          | hypothetical protein                            | 18   | 37   | 25   | 23   | 26   | 24   | 27   | 24   | 1.11     | 0.683472 | 25  | 34  | 26  | 29   | 26   | 21  | 24   | 28   | 28  | 26   | 1.11     | 0.349088 | 25       | 1.12     | 0.448720 |          |
| 246926_at | A15g26990 | drought-induced protein - like non-con    | drought-responsive family protein               | 148  | 222  | 218  | 242  | 243  | 195  | 196  | 227  | 0.86     | 0.344165 | 212 | 232 | 233 | 333  | 262  | 257 | 239  | 229  | 226 | 264  | 0.86     | 0.176323 | 284      | 0.80     | 0.087537 |          |
| 246927_at | A15g27010 | putative protein predicted proteins       | As hydrovathelial protein /// expressed protein | 120  | 139  | 154  | 149  | 187  | 138  | 137  | 158  | 0.87     | 0.305848 | 134 | 119 | 128 | 158  | 148  | 133 | 162  | 145  | 127 | 149  | 0.85     | 0.025657 | 146      | 0.87     | 0.084085 |          |
| 246928_at | A15g27020 | putative protein                          | hypothetical protein                            | 20   | 18   | 23   | 26   | 33   | 29   | 20   | 29   | 1.02     | 0.024045 | 16  | 16  | 24  | 18   | 15   | 18  | 15   | 20   | 20  | 0.99 | 0.935125 | 18       | 1.05     | 0.054042 |          |          |
| 246929_at | A15g26770 | putative protein myosin heavy chain, c    | expressed protein                               | 235  | 275  | 312  | 347  | 350  | 250  | 274  | 316  | 0.87     | 0.352663 | 157 | 213 | 180 | 260  | 174  | 190 | 192  | 246  | 183 | 213  | 0.86     | 0.298275 | 208      | 0.88     | 0.467912 |          |
| 246930_at | A15g26790 | putative protein - supported by full-len  | g expressed protein                             | 52   | 69   | 69   | 77   | 97   | 79   | 64   | 84   | 0.76     | 0.074945 | 47  | 42  | 52  | 84   | 61   | 53  | 55   | 57   | 47  | 62   | 0.76     | 0.107618 | 66       | 0.71     | 0.125943 |          |
| 246931_at | A15g26930 | putative protein various predicted prot   | zinc finger (GATA type) family protein          | 30   | 28   | 44   | 45   | 47   | 35   | 34   | 43   | 0.80     | 0.222929 | 24  | 62  | 25  | 25   | 24   | 29  | 43   | 34   | 37  | 31   | 1.20     | 0.568010 | 28       | 1.44     | 0.415202 |          |
| 246932_at | A15g26940 | putative protein various predicted prot   | hexosamine family protein                       | 140  | 153  | 163  | 167  | 190  | 130  | 143  | 165  | 0.86     | 0.234752 | 158 | 167 | 160 | 266  | 208  | 193 | 203  | 185  | 153 | 209  | 0.73     | 0.016499 | 219      | 0.70     | 0.028066 |          |
| 246933_at | A15g26780 | oligine hydroxymethyltransferase - like   | oligine hydroxymethyltransferase, auto          | 170  | 206  | 189  |      |      |      |      |      |          |          |     |     |     |      |      |     |      |      |     |      |          |          |          |          |          |          |

|             |           |                                                                                       |      |      |      |      |      |      |      |      |          |          |      |      |      |      |      |      |      |          |      |      |          |           |      |          |          |
|-------------|-----------|---------------------------------------------------------------------------------------|------|------|------|------|------|------|------|------|----------|----------|------|------|------|------|------|------|------|----------|------|------|----------|-----------|------|----------|----------|
| 246731_at   | A15g27630 | putative protein RING finger mOb prot acyl-CoA binding family protein                 | 85   | 108  | 94   | 113  | 137  | 104  | 95   | 118  | 0.81     | 0.128431 | 57   | 52   | 65   | 94   | 79   | 66   | 70   | 66       | 58   | 75   | 0.77     | 0.066713  | 80   | 0.73     | 0.075251 |
| 246732_at   | A15g27650 | putative protein hypothetical protein Pf PWWP domain-containing protein               | 187  | 218  | 207  | 251  | 284  | 196  | 204  | 244  | 0.84     | 0.219516 | 198  | 154  | 197  | 264  | 242  | 191  | 281  | 250      | 183  | 245  | 0.74     | 0.032954  | 232  | 0.79     | 0.128630 |
| 246733_at   | A15g27660 | serine protease-like protein serine pro DegP protease, putative                       | 177  | 222  | 211  | 249  | 284  | 224  | 203  | 252  | 0.81     | 0.091793 | 170  | 183  | 179  | 257  | 207  | 191  | 191  | 186      | 177  | 207  | 0.86     | 0.146435  | 219  | 0.81     | 0.108477 |
| 246734_at   | A15g27680 | putative protein WRN/ Werner syndrome protein chitinase-like protein                  | 41   | 46   | 53   | 59   | 51   | 45   | 53   | 45   | 0.84     | 0.045425 | 29   | 33   | 34   | 39   | 30   | 27   | 30   | 27       | 30   | 27   | 0.87     | 0.762341  | 32   | 0.87     | 0.086788 |
| 246735_at   | A15g27670 | histone H2A-like protein histone H2A - histone H4A, putative                          | 621  | 822  | 803  | 982  | 1011 | 896  | 752  | 963  | 0.78     | 0.047168 | 390  | 425  | 468  | 627  | 489  | 445  | 441  | 425      | 428  | 486  | 0.88     | 0.309518  | 520  | 0.82     | 0.194518 |
| 246736_at   | A15g27560 | putative protein hypothetical protein sll expressed protein                           | 122  | 165  | 171  | 188  | 221  | 176  | 153  | 195  | 0.78     | 0.107720 | 158  | 174  | 179  | 250  | 199  | 194  | 210  | 191      | 170  | 209  | 0.82     | 0.042403  | 214  | 0.79     | 0.080220 |
| 246737_at   | A15g27710 | putative protein                                                                      | 172  | 225  | 241  | 264  | 304  | 239  | 213  | 269  | 0.79     | 0.115784 | 229  | 263  | 276  | 391  | 323  | 293  | 281  | 275      | 256  | 313  | 0.82     | 0.109442  | 336  | 0.76     | 0.067696 |
| 246738_at   | A15g27740 | putative protein                                                                      | 398  | 541  | 525  | 639  | 687  | 519  | 451  | 586  | 0.86     | 0.035432 | 442  | 509  | 527  | 741  | 535  | 494  | 529  | 476      | 479  | 534  | 0.84     | 0.180998  | 614  | 0.79     | 0.130762 |
| 246739_at   | A15g27800 | putative protein predicted protein, Arab expressed protein                            | 15   | 25   | 27   | 28   | 23   | 28   | 22   | 26   | 0.84     | 0.340138 | 21   | 21   | 23   | 20   | 19   | 15   | 20   | 22       | 21   | 19   | 1.10     | 0.294848  | 18   | 1.17     | 0.140952 |
| 246740_at   | A15g27810 | putative protein                                                                      | 9    | 11   | 12   | 10   | 11   | 15   | 11   | 12   | 0.90     | 0.506968 | 21   | 24   | 17   | 10   | 12   | 9    | 10   | 11       | 21   | 11   | 1.96     | 0.006092  | 10   | 1.97     | 0.010734 |
| 246741_at   | A15g27720 | glycine rich protein - like glycine rich or small nuclear ribonucleoprotein, outative | 468  | 596  | 583  | 705  | 740  | 599  | 549  | 681  | 0.81     | 0.087922 | 624  | 737  | 735  | 1002 | 775  | 782  | 700  | 713      | 699  | 794  | 0.88     | 0.263626  | 853  | 0.82     | 0.137458 |
| 246742_at   | A15g27840 | TOPBP1 serine/threonine protein chafaz serine/threonine protein choschase P1          | 158  | 195  | 238  | 233  | 250  | 220  | 197  | 234  | 0.84     | 0.077331 | 169  | 150  | 170  | 226  | 177  | 183  | 181  | 163      | 191  | 163  | 0.85     | 0.128813  | 197  | 0.83     | 0.178898 |
| 246743_at   | A15g27750 | putative protein predicted proteins, Arab F-box family protein                        | 177  | 233  | 293  | 246  | 278  | 202  | 234  | 242  | 0.87     | 0.054432 | 231  | 233  | 242  | 266  | 275  | 241  | 227  | 241      | 207  | 227  | 0.81     | 0.533921  | 247  | 0.92     | 0.339651 |
| 246744_at   | A15g27760 | putative protein predicted protein, Arab hypoxia-responsive family protein            | 652  | 854  | 939  | 1004 | 1121 | 954  | 815  | 1026 | 0.79     | 0.098233 | 754  | 944  | 931  | 1182 | 1001 | 918  | 838  | 812      | 876  | 950  | 0.92     | 0.486964  | 1034 | 0.85     | 0.188366 |
| 246745_at   | A15g27770 | 60S ribosomal protein L22 - like riboso 60S ribosomal protein L22 (RPL22C)            | 1527 | 1946 | 1929 | 2058 | 2219 | 1740 | 1800 | 2006 | 0.90     | 0.355050 | 1412 | 1427 | 1584 | 2063 | 1670 | 1590 | 1644 | 1683     | 1474 | 1730 | 0.85     | 0.076982  | 1774 | 0.83     | 0.127051 |
| 246746_at   | A15g27820 | putative protein predicted proteins, On ribosomal protein L18 family protein          | 386  | 537  | 506  | 572  | 671  | 529  | 476  | 591  | 0.81     | 0.142167 | 362  | 526  | 510  | 710  | 487  | 535  | 525  | 510      | 476  | 553  | 0.86     | 0.254897  | 577  | 0.82     | 0.274003 |
| 246747_at   | A15g27700 | ribosomal protein S21 - like ribosomal 40S ribosomal protein S21 (RPS21C)             | 3014 | 3826 | 3874 | 3753 | 4425 | 3719 | 3571 | 3966 | 0.90     | 0.336482 | 3536 | 3050 | 3339 | 4044 | 3926 | 3448 | 3910 | 3910     | 3308 | 3839 | 0.86     | 0.019453  | 3793 | 0.87     | 0.098460 |
| 246748_at   | A15g27730 | putative protein predicted proteins, Dros expressed protein                           | 197  | 332  | 328  | 296  | 379  | 265  | 303  | 314  | 0.87     | 0.882003 | 366  | 429  | 333  | 460  | 376  | 375  | 565  | 532      | 376  | 462  | 0.81     | 0.176304  | 404  | 0.93     | 0.522976 |
| 246749_at   | A15g27830 | putative protein : supported by cDNA : expressed protein                              | 258  | 297  | 361  | 399  | 415  | 324  | 305  | 380  | 0.80     | 0.143458 | 268  | 285  | 302  | 430  | 363  | 336  | 309  | 291      | 285  | 346  | 0.82     | 0.116059  | 374  | 0.76     | 0.036114 |
| 246750_at   | A15g27860 | putative protein predicted proteins, Dros expressed protein                           | 151  | 197  | 196  | 206  | 202  | 197  | 181  | 201  | 0.90     | 0.255553 | 193  | 249  | 216  | 314  | 228  | 190  | 270  | 259      | 219  | 252  | 0.87     | 0.315670  | 246  | 0.90     | 0.572725 |
| 246751_at   | A15g27870 | pectin methyl-esterase - like protein de pectinesterase family protein                | 29   | 35   | 31   | 36   | 32   | 30   | 33   | 0.92 | 0.422568 | 24       | 36   | 25   | 27   | 26   | 25   | 27   | 0.92 | 0.246744 | 26   | 0.95 | 0.430287 |           |      |          |          |
| 246752_at   | A15g27890 | putative protein predicted proteins, Aps expressed protein                            | 27   | 32   | 40   | 34   | 44   | 42   | 33   | 40   | 0.83     | 0.236032 | 21   | 23   | 30   | 28   | 25   | 19   | 29   | 22       | 25   | 24   | 1.02     | 0.900431  | 24   | 1.04     | 0.805157 |
| 246753_at   | A15g27900 | putative protein                                                                      | 15   | 16   | 24   | 18   | 23   | 21   | 19   | 21   | 0.91     | 0.574755 | 23   | 23   | 23   | 22   | 22   | 20   | 21   | 17       | 23   | 20   | 1.15     | 0.054072  | 21   | 1.09     | 0.043021 |
| 246754_at   | A15g27910 | transcription factor - like protein HaeB5 CCAAT-box binding transcription factor I    | 33   | 37   | 42   | 39   | 43   | 37   | 37   | 40   | 0.94     | 0.492301 | 33   | 36   | 45   | 28   | 32   | 32   | 29   | 34       | 38   | 31   | 1.22     | 0.055329  | 31   | 1.23     | 0.121719 |
| 246755_at   | A15g27920 | F-box protein family contains similarity F-box family protein                         | 226  | 352  | 377  | 192  | 223  | 165  | 318  | 193  | 1.65     | 0.064789 | 314  | 302  | 282  | 282  | 265  | 263  | 298  | 304      | 300  | 283  | 1.06     | 0.243556  | 270  | 1.11     | 0.052327 |
| 246756_at   | A15g27930 | protein phosphatase - like protein phos protein phosphatase 2C, putative / PP2C       | 65   | 127  | 80   | 132  | 148  | 102  | 91   | 127  | 0.71     | 0.188258 | 70   | 71   | 74   | 127  | 118  | 116  | 142  | 127      | 71   | 126  | 0.57     | 0.000120  | 121  | 0.59     | 0.000169 |
| 246757_at   | A15g27940 | Expressed protein ; supported by full-le MFPI attachment factor, putative             | 58   | 57   | 69   | 55   | 60   | 51   | 62   | 55   | 1.11     | 0.240991 | 63   | 60   | 65   | 56   | 60   | 55   | 48   | 41       | 63   | 52   | 0.91     | 0.2105940 | 57   | 1.10     | 0.043293 |
| 246758_at   | A15g27850 | 60S ribosomal protein - like 60S riboso 60S ribosomal protein L18 (RPL18C)            | 3707 | 4316 | 4624 | 4648 | 4764 | 4410 | 4216 | 4607 | 0.92     | 0.246779 | 3328 | 3648 | 3685 | 4306 | 3814 | 3358 | 4068 | 3969     | 3554 | 3903 | 0.91     | 0.173267  | 3826 | 0.93     | 0.409399 |
| 246759_at   | A15g27950 | putative protein kinase heavy chain-lik kinase mot protein-related                    | 132  | 238  | 201  | 250  | 275  | 192  | 190  | 242  | 0.79     | 0.260101 | 165  | 188  | 162  | 241  | 176  | 174  | 184  | 182      | 171  | 191  | 0.90     | 0.308014  | 197  | 0.87     | 0.338680 |
| 246760_at   | A15g27970 | putative protein predicted proteins, Cae expressed protein                            | 197  | 233  | 265  | 285  | 214  | 221  | 251  | 261  | 0.83     | 0.254432 | 131  | 113  | 136  | 152  | 138  | 165  | 152  | 161      | 150  | 181  | 0.91     | 0.015941  | 193  | 0.84     | 0.083654 |
| 246761_at   | A15g27980 | embryonic abundant protein - like emb seed maturation family protein                  | 21   | 25   | 28   | 23   | 27   | 25   | 24   | 25   | 0.98     | 0.831884 | 18   | 23   | 22   | 20   | 18   | 21   | 22   | 17       | 21   | 20   | 1.06     | 0.552792  | 20   | 1.05     | 0.621205 |
| 246762_at   | A15g28010 | major latex protein homolog - like maic Bet v I allergen family protein               | 23   | 32   | 27   | 35   | 36   | 24   | 27   | 32   | 0.86     | 0.382519 | 21   | 22   | 22   | 35   | 38   | 35   | 32   | 39       | 22   | 36   | 0.61     | 0.000161  | 36   | 0.61     | 0.000225 |
| 246763_at   | A15g28040 | putative protein various predicted prot putative protein various predicted protei     | 382  | 416  | 472  | 549  | 585  | 532  | 423  | 555  | 0.76     | 0.012651 | 316  | 315  | 371  | 474  | 390  | 384  | 378  | 406      | 334  | 407  | 0.82     | 0.035556  | 416  | 0.80     | 0.074952 |
| 246764_at   | A15g28070 | putative protein                                                                      | 4    | 3    | 4    | 7    | 6    | 5    | 6    | 0.93 | 0.852407 | 7        | 8    | 6    | 7    | 4    | 7    | 6    | 4    | 7        | 6    | 1.26 | 0.177636 | 5         | 1.54 | 0.019000 |          |
| 246765_at   | A15g28060 | 40S ribosomal protein S19 - like 40S r 40S ribosomal protein S24 (RPS24B)             | 1045 | 1381 | 1418 | 1427 | 1372 | 1302 | 1281 | 1367 | 0.94     | 0.526701 | 969  | 1195 | 1160 | 1516 | 1088 | 1012 | 1205 | 1208     | 1108 | 1206 | 0.92     | 0.464712  | 1205 | 0.92     | 0.600514 |
| 246766_at   | A15g27990 | putative protein predicted proteins, Sas expressed protein                            | 146  | 145  | 186  | 153  | 158  | 149  | 146  | 153  | 0.95     | 0.771684 | 97   | 137  | 119  | 161  | 110  | 117  | 130  | 133      | 118  | 118  | 0.90     | 0.422043  | 129  | 0.91     | 0.585557 |
| 246767_at   | A15g28030 | cysteine synthase - like cysteine synth cysteine synthase, putative / O-acetylase     | 21   | 30   | 26   | 33   | 34   | 26   | 26   | 31   | 0.83     | 0.223405 | 21   | 29   | 29   | 35   | 25   | 21   | 35   | 29       | 27   | 29   | 0.92     | 0.620215  | 27   | 0.99     | 0.978674 |
| 246768_at   | A15g28020 | cysteine synthase - supported by full-le cysteine synthase, putative / O-acetylase    | 145  | 171  | 145  | 275  | 254  | 140  | 318  | 0.45 | 0.036422 | 307      | 359  | 359  | 681  | 490  | 439  | 442  | 410  | 342      | 462  | 439  | 0.86     | 0.063895  | 537  | 0.84     | 0.041445 |
| 246769_at   | A15g28050 | putative cytidine deaminase - like puta cytidine/deoxycytidine deaminase fami         | 424  | 481  | 565  | 664  | 733  | 568  | 490  | 655  | 0.75     | 0.059366 | 511  | 488  | 479  | 833  | 695  | 615  | 569  | 492      | 493  | 642  | 0.77     | 0.105301  | 716  | 0.69     | 0.025281 |
| 246770_at   | A15g28080 | mitogen activated protein kinase - like protein kinase family protein                 | 55   | 72   | 80   | 83   | 87   | 80   | 72   | 83   | 0.87     | 0.343039 | 48   | 55   | 54   | 52   | 50   | 46   | 86   | 60       | 52   | 59   | 0.89     | 0.532727  | 49   | 1.06     | 0.308048 |
| 246771_at   | A15g28090 | putative protein                                                                      | 31   | 32   | 39   | 35   | 41   | 37   | 34   | 38   | 0.90     | 0.318484 | 28   | 25   | 33   | 27   | 25   | 29   | 28   | 29       | 28   | 29   | 1.05     | 0.511380  | 27   | 1.08     | 0.428442 |
| 246772_x_at | A15g28110 | putative protein predicted resistance n hvhothetical protein /// avowey-like retroir  | 9    | 13   | 13   | 9    | 12   | 12   | 12   | 12   | 1.11     | 0.789411 | 12   | 13   | 10   | 8    | 11   | 10   | 8    | 15       | 8    | 17.4 | 0.017052 | 9         | 0.74 | 0.070825 |          |
| 246773_at   | A15g28130 | putative protein predicted proteins, Arab poyxy-like retrotransposon family /// exp   | 7    | 11   | 11   | 11   | 14   | 11   | 10   | 12   | 0.83     | 0.257338 | 6    | 7    | 10   | 8    | 14   | 11   | 9    | 8        | 10   | 9    | 1.00     | 0.998025  | 9    | 0.81     | 0.025311 |
| 246774_at   | A15g28140 | putative protein                                                                      | 20   | 17   | 22   | 23   | 21   | 19   | 22   | 0.86 | 0.035096 | 13       | 24   | 12   | 14   | 14   | 13   | 16   | 11   | 16       | 14   | 14   | 1.18     | 0.414339  | 14   | 1.17     | 0.562081 |
| 246775_at   | A15g28150 | putative protein various predicted prot expressed protein                             | 114  | 160  | 162  | 383  | 457  | 343  | 146  | 395  | 0.37     | 0.002532 | 202  | 165  | 201  | 425  | 319  | 323  | 337  | 333      | 190  | 348  | 0.95     | 0.001259  | 356  | 0.53     | 0.010661 |
| 246776_s_at | A15g28160 | putative protein many predicted protein leich reeoxat-containing F-box family cro     | 3    | 7    | 5    | 6    | 6    | 5    | 6    | 0.86 | 0.023549 | 5        | 6    | 5    | 4    | 6    | 5    | 5    | 1.03 | 0.844771 | 5    | 0.95 | 0.738032 |           |      |          |          |
| 246777_at   | A15g28170 | putative protein predicted proteins, Arab Ubl1 crelease family protein /// hvhothet   | 11   | 17   | 18   | 18   | 21   | 18   | 17   | 18   | 0.83     | 0.315157 | 18   | 16   | 22   | 18   | 13   | 16   | 12   | 13       | 15   | 16   | 1.26     | 0.017932  | 16   | 1.21     | 0.027386 |
| 246778_at   | A15g28190 | putative protein                                                                      | 16   | 14   | 22   | 17   | 19   | 23   | 18   | 19   | 0.90     | 0.561847 | 15   | 17   | 17   | 19   | 20   | 19   | 18   | 16       | 19   | 18   |          |           |      |          |          |

|             |           |                                                                                       |      |      |      |      |      |      |      |      |          |          |      |      |      |      |      |      |      |      |      |      |       |          |      |       |          |
|-------------|-----------|---------------------------------------------------------------------------------------|------|------|------|------|------|------|------|------|----------|----------|------|------|------|------|------|------|------|------|------|------|-------|----------|------|-------|----------|
| 246636_at   | A15g34850 | acid phosphatase-like protein purple a calcineurin-like phosphoesterase family        | 573  | 671  | 657  | 745  | 767  | 585  | 634  | 699  | 0.91     | 0.321552 | 654  | 689  | 683  | 965  | 774  | 701  | 726  | 686  | 675  | 771  | 0.88  | 0.211655 | 813  | 0.83  | 0.156751 |
| 246637_at   | A15g34870 | putative protein polymorphic membran zinc knuckle (CCHC-type) family protein          | 14   | 22   | 18   | 41   | 16   | 19   | 18   | 25   | 0.71     | 0.423588 | 13   | 17   | 17   | 17   | 13   | 13   | 30   | 9    | 15   | 16   | 0.95  | 0.870632 | 14   | 1.09  | 0.528915 |
| 246638_at   | A15g34880 | putative protein predicted proteins. Ara gypyl-like retrotransposon family            | 21   | 17   | 14   | 24   | 24   | 24   | 21   | 24   | 0.86     | 0.184717 | 15   | 16   | 22   | 18   | 18   | 20   | 23   | 15   | 17   | 19   | 0.92  | 0.558299 | 19   | 0.92  | 0.578929 |
| 246639_x_at | A15g34890 | adenylate kinase -like protein. hydrolytic phosphatase family // hvo                  | 25   | 24   | 27   | 24   | 26   | 26   | 24   | 27   | 0.90     | 0.180074 | 14   | 19   | 19   | 19   | 19   | 20   | 16   | 17   | 19   | 17   | 1.12  | 0.097452 | 17   | 1.12  | 0.103644 |
| 246640_x_at | A15g34900 | putative protein predicted proteins. Ara gypyl-like retrotransposon family            | 79   | 96   | 117  | 100  | 113  | 106  | 97   | 106  | 0.92     | 0.481080 | 52   | 52   | 73   | 56   | 55   | 40   | 72   | 60   | 59   | 58   | 1.01  | 0.934350 | 53   | 1.11  | 0.479416 |
| 246641_s_at | A15g34885 | Expressed protein, supported by full-length expressed protein // hypothetical protein | 106  | 250  | 291  | 20   | 22   | 20   | 216  | 21   | 10.33    | 0.025229 | 634  | 636  | 622  | 24   | 19   | 49   | 25   | 19   | 631  | 27   | 23.46 | 0.000000 | 30   | 20.75 | 0.000000 |
| 246642_s_at | A15g34920 | putative protein predicted proteins. Ara CACTA-like transposase family (PtaEn         | 29   | 54   | 57   | 37   | 45   | 35   | 47   | 39   | 1.20     | 0.454339 | 36   | 37   | 33   | 50   | 34   | 35   | 42   | 36   | 35   | 40   | 0.89  | 0.330386 | 40   | 0.88  | 0.420517 |
| 246643_s_at | A15g34990 | putative protein predicted proteins. Ara CACTA-like transposase family // hvo         | 2    | 2    | 2    | 2    | 2    | 2    | 2    | 2    | 2.78     | 0.000000 | 0    | 1    | 1    | 2    | 1    | 2    | 2    | 2    | 2    | 1    | 1.75  | 0.218398 | 1    | 0.26  | 0.000000 |
| 246644_at   | A15g35100 | putative protein                                                                      | 117  | 182  | 202  | 216  | 215  | 170  | 167  | 200  | 0.83     | 0.329372 | 152  | 192  | 190  | 217  | 179  | 174  | 197  | 183  | 178  | 190  | 0.94  | 0.425448 | 190  | 0.94  | 0.550108 |
| 246645_at   | A15g35080 | putative protein -supported by full-length expressed protein                          | 319  | 428  | 478  | 447  | 460  | 387  | 408  | 431  | 0.95     | 0.682558 | 351  | 409  | 423  | 503  | 429  | 379  | 379  | 378  | 394  | 400  | 0.96  | 0.717371 | 437  | 0.94  | 0.370934 |
| 246646_at   | A15g35090 | putative protein -supported by full-length expressed protein                          | 41   | 52   | 51   | 15   | 19   | 15   | 48   | 16   | 2.93     | 0.001197 | 49   | 60   | 47   | 14   | 9    | 12   | 10   | 12   | 52   | 11   | 4.58  | 0.000013 | 12   | 4.50  | 0.000692 |
| 246647_x_at | A15g35130 | putative protein predicted proteins from pseudogenes, similar to putative helicase    | 12   | 7    | 13   | 11   | 13   | 13   | 11   | 12   | 0.90     | 0.158072 | 14   | 19   | 12   | 15   | 13   | 14   | 27   | 14   | 15   | 17   | 0.90  | 0.657526 | 14   | 1.06  | 0.721784 |
| 246648_at   | A15g35140 | putative protein predicted proteins from hypothetical protein // CACTA-like trans     | 21   | 25   | 31   | 22   | 28   | 26   | 26   | 26   | 0.90     | 0.926460 | 13   | 20   | 20   | 18   | 14   | 12   | 19   | 18   | 18   | 16   | 1.08  | 0.601153 | 15   | 1.18  | 0.405144 |
| 246649_at   | A15g35150 | putative protein predicted proteins. Ara CACTA-like transposase family (PtaEn         | 37   | 42   | 44   | 39   | 38   | 38   | 41   | 38   | 1.08     | 0.199944 | 30   | 31   | 40   | 41   | 33   | 38   | 40   | 36   | 34   | 38   | 0.90  | 0.249553 | 37   | 0.90  | 0.414047 |
| 246650_at   | A15g35160 | putative protein p76, Homo sapiens, E. endomembrane protein 70, putative              | 295  | 316  | 308  | 402  | 396  | 336  | 306  | 378  | 0.81     | 0.031614 | 210  | 229  | 259  | 340  | 268  | 217  | 269  | 279  | 233  | 275  | 0.85  | 0.187560 | 275  | 0.85  | 0.333808 |
| 246651_at   | A15g35170 | adenylate kinase -like protein adenylate adenylate kinase family protein              | 169  | 314  | 240  | 255  | 322  | 251  | 241  | 276  | 0.87     | 0.504882 | 221  | 223  | 235  | 322  | 260  | 222  | 288  | 268  | 227  | 272  | 0.83  | 0.086165 | 268  | 0.85  | 0.233608 |
| 246652_at   | A15g35190 | putative protein predicted proteins from hypothetical protein                         | 24   | 23   | 24   | 23   | 24   | 24   | 24   | 27   | 0.87     | 0.369534 | 25   | 24   | 22   | 23   | 22   | 23   | 22   | 20   | 23   | 22   | 1.07  | 0.108867 | 22   | 1.04  | 0.560906 |
| 246653_at   | A15g35200 | putative protein clathrin assembly erot esin E-terminal homolog (ENTH) dom            | 164  | 250  | 240  | 243  | 294  | 190  | 221  | 242  | 0.91     | 0.644288 | 205  | 241  | 203  | 272  | 233  | 221  | 240  | 208  | 216  | 235  | 0.92  | 0.314300 | 242  | 0.89  | 0.260943 |
| 246654_s_at | A15g35210 | putative protein predicted protein from : peptidase M50 family protein / sterol-rec   | 440  | 617  | 627  | 594  | 682  | 519  | 561  | 598  | 0.94     | 0.654422 | 451  | 400  | 468  | 578  | 490  | 433  | 542  | 534  | 440  | 515  | 0.85  | 0.085894 | 500  | 0.88  | 0.267018 |
| 246655_at   | A15g35230 | hypothetical protein                                                                  | 17   | 22   | 19   | 26   | 20   | 20   | 22   | 0.91 | 0.482768 | 11       | 13   | 21   | 19   | 15   | 14   | 16   | 14   | 15   | 16   | 19   | 0.97  | 0.872573 | 16   | 0.95  | 0.818541 |
| 246656_at   | A15g35240 | hypothetical protein                                                                  | 12   | 18   | 28   | 19   | 21   | 18   | 19   | 1.00 | 0.398916 | 17       | 19   | 18   | 18   | 15   | 17   | 19   | 17   | 19   | 17   | 17   | 1.05  | 0.441960 | 17   | 1.08  | 0.239320 |
| 246657_at   | A15g35250 | putative protein predicted proteins. Ara pseudogene, hypothetical protein // hvo      | 9    | 8    | 7    | 13   | 11   | 13   | 8    | 12   | 0.64     | 0.101721 | 10   | 7    | 11   | 9    | 10   | 6    | 9    | 11   | 9    | 9    | 1.02  | 0.894002 | 8    | 1.10  | 0.659791 |
| 246658_at   | A15g35260 | putative protein predicted proteins. Ara pseudogene, hypothetical protein // reol     | 2    | 1    | 1    | 1    | 2    | 2    | 1    | 2    | 0.90     | 0.797398 | 2    | 1    | 2    | 3    | 2    | 8    | 4    | 4    | 2    | 4    | 0.44  | 0.174596 | 4    | 0.41  | 0.279407 |
| 246659_at   | A15g35270 | putative protein predicted proteins Araat cytochrome P-450 aromatase-related          | 7    | 8    | 12   | 9    | 8    | 9    | 9    | 9    | 0.99     | 0.940654 | 7    | 13   | 12   | 8    | 8    | 5    | 11   | 4    | 2    | 7    | 1.43  | 0.185634 | 7    | 1.47  | 0.200866 |
| 246660_at   | A15g35180 | putative protein predicted protein. Araat expressed protein                           | 751  | 996  | 1038 | 1346 | 1483 | 1078 | 928  | 1302 | 0.71     | 0.060011 | 786  | 613  | 877  | 1178 | 1083 | 801  | 986  | 926  | 759  | 1015 | 0.75  | 0.022613 | 1054 | 0.72  | 0.059253 |
| 246661_at   | A15g35280 | putative protein various predicted prot cypsy-like retrotransposon family (Atheta     | 2    | 3    | 2    | 1    | 2    | 5    | 3    | 3    | 0.96     | 0.927485 | 4    | 4    | 5    | 0    | 3    | 1    | 5    | 2    | 1    | 2    | 1     | 0.001837 | 24   | 2.37  | 0.053216 |
| 246662_at   | A15g35290 | putative protein                                                                      | 49   | 53   | 81   | 77   | 71   | 66   | 61   | 72   | 0.85     | 0.381471 | 32   | 32   | 43   | 35   | 37   | 37   | 45   | 43   | 36   | 40   | 0.90  | 0.343884 | 36   | 0.98  | 0.874355 |
| 246663_at   | A15g35300 | putative protein                                                                      | 45   | 54   | 73   | 75   | 63   | 64   | 57   | 67   | 0.85     | 0.318742 | 39   | 45   | 51   | 45   | 41   | 43   | 42   | 43   | 45   | 43   | 1.06  | 0.381232 | 43   | 1.05  | 0.565005 |
| 246664_at   | A15g35310 | putative protein                                                                      | 27   | 29   | 33   | 35   | 36   | 35   | 30   | 35   | 0.85     | 0.034890 | 23   | 23   | 23   | 27   | 22   | 23   | 31   | 26   | 23   | 26   | 0.90  | 0.284492 | 24   | 0.97  | 0.641407 |
| 246665_at   | A15g35340 | putative protein predicted proteins. Ara pseudogene, hypothetical protein             | 21   | 28   | 29   | 26   | 24   | 23   | 24   | 27   | 0.89     | 0.519806 | 17   | 22   | 23   | 22   | 23   | 21   | 27   | 19   | 19   | 21   | 0.88  | 0.297371 | 19   | 0.91  | 0.718671 |
| 246666_at   | A15g35350 | putative protein                                                                      | 15   | 19   | 26   | 25   | 24   | 30   | 20   | 26   | 0.76     | 0.172409 | 16   | 18   | 19   | 21   | 17   | 20   | 24   | 17   | 18   | 20   | 0.89  | 0.291538 | 19   | 0.92  | 0.354046 |
| 246667_at   | A15g35370 | receptor-like protein kinase -like protein lectin protein kinase family protein       | 29   | 32   | 47   | 36   | 38   | 30   | 36   | 35   | 1.04     | 0.832278 | 29   | 32   | 30   | 22   | 19   | 16   | 23   | 26   | 30   | 21   | 1.42  | 0.009285 | 19   | 1.58  | 0.004970 |
| 246668_at   | A15g35380 | putative protein various predicted protein kinase family protein                      | 16   | 16   | 21   | 19   | 21   | 18   | 18   | 19   | 0.92     | 0.421812 | 15   | 17   | 16   | 13   | 14   | 10   | 19   | 17   | 16   | 15   | 1.08  | 0.572894 | 13   | 1.27  | 0.086291 |
| 246669_at   | A15g35390 | putative receptor-like protein kinase re leucine-rich repeat transmembrane rec        | 19   | 28   | 24   | 23   | 31   | 27   | 24   | 27   | 0.87     | 0.369534 | 25   | 24   | 22   | 23   | 22   | 21   | 20   | 23   | 23   | 22   | 1.07  | 0.108867 | 22   | 1.04  | 0.560906 |
| 246670_at   | A15g35400 | putative protein                                                                      | 117  | 146  | 145  | 157  | 159  | 137  | 136  | 151  | 0.90     | 0.265899 | 130  | 116  | 151  | 197  | 151  | 147  | 148  | 139  | 132  | 156  | 0.85  | 0.174050 | 165  | 0.80  | 0.161360 |
| 246671_at   | A15g35330 | putative protein predicted proteins. Ara methyl-CoG-binding domain-containing         | 205  | 303  | 307  | 287  | 388  | 260  | 272  | 311  | 0.87     | 0.486224 | 301  | 337  | 291  | 448  | 332  | 332  | 300  | 327  | 310  | 347  | 0.89  | 0.326757 | 370  | 0.84  | 0.211768 |
| 246672_at   | A15g35320 | putative protein -supported by full-length expressed protein                          | 204  | 300  | 258  | 306  | 532  | 284  | 254  | 374  | 0.88     | 0.227148 | 267  | 306  | 300  | 302  | 303  | 322  | 309  | 283  | 291  | 322  | 0.90  | 0.292510 | 339  | 0.86  | 0.184947 |
| 246673_at   | A15g35360 | acetyl-CoA carboxylase -supported by acetyl-CoA carboxylase, biotin carboxyl          | 688  | 721  | 786  | 873  | 984  | 742  | 699  | 869  | 0.81     | 0.137800 | 611  | 542  | 661  | 825  | 691  | 722  | 706  | 604  | 772  | 816  | 0.78  | 0.031615 | 896  | 0.75  | 0.026233 |
| 246674_at   | A15g35340 | serine/threonine protein kinase SOS2 / CBL-interacting protein kinase 24 /CIPK        | 48   | 63   | 72   | 58   | 62   | 54   | 61   | 58   | 1.05     | 0.091271 | 65   | 67   | 69   | 73   | 57   | 48   | 63   | 55   | 67   | 59   | 1.14  | 0.213431 | 59   | 1.13  | 0.353813 |
| 246675_at   | A15g35420 | putative protein similar to unknown prot pseudogene, hypothetical protein             | 59   | 69   | 83   | 77   | 68   | 64   | 70   | 70   | 1.01     | 0.923932 | 53   | 76   | 70   | 69   | 50   | 51   | 76   | 69   | 66   | 63   | 1.05  | 0.708294 | 57   | 1.17  | 0.359971 |
| 246676_at   | A15g35260 | aspartyl protease-like                                                                | 30   | 40   | 46   | 44   | 51   | 46   | 39   | 47   | 0.82     | 0.173529 | 31   | 30   | 35   | 34   | 29   | 30   | 33   | 36   | 32   | 32   | 0.99  | 0.819586 | 31   | 1.03  | 0.679666 |
| 246677_at   | A15g35270 | GSH-dependent dehydroascorbate red dehydroascorbate reductase, putative               | 81   | 113  | 138  | 227  | 256  | 218  | 111  | 234  | 0.47     | 0.000565 | 68   | 67   | 67   | 123  | 100  | 92   | 115  | 104  | 67   | 108  | 0.82  | 0.002556 | 107  | 0.63  | 0.020759 |
| 246678_at   | A15g35280 | putative protein similar to unknown prot hypothetical protein                         | 40   | 49   | 43   | 43   | 30   | 42   | 42   | 37   | 0.97     | 0.832463 | 30   | 27   | 36   | 33   | 38   | 32   | 37   | 40   | 33   | 33   | 0.83  | 0.848537 | 30   | 1.09  | 0.631880 |
| 246679_at   | A15g35290 | transmembrane protein FTZ/PPFZ-ii-expressed protein                                   | 718  | 808  | 771  | 1054 | 1118 | 844  | 766  | 1005 | 0.76     | 0.051089 | 806  | 773  | 812  | 1003 | 951  | 893  | 784  | 753  | 797  | 895  | 0.89  | 0.278791 | 979  | 0.81  | 0.040425 |
| 246680_at   | A15g35220 | cytochrome P450 - supported by cDNA cytochrome P450 81D1 (CYP81D1) (CY                | 26   | 26   | 33   | 37   | 33   | 27   | 28   | 32   | 0.88     | 0.335592 | 18   | 34   | 28   | 20   | 34   | 28   | 20   | 23   | 24   | 27   | 1.22  | 0.230484 | 21   | 1.31  | 0.246203 |
| 246681_at   | A15g35230 | putative protein strong similarity to unkl eIF-4 gamma/eIF5e2-epsilon domain          | 793  | 1122 | 1206 | 1283 | 1428 | 985  | 1040 | 1232 | 0.84     | 0.349472 | 844  | 809  | 781  | 998  | 883  | 849  | 908  | 837  | 811  | 895  | 0.91  | 0.083751 | 910  | 0.89  | 0.112459 |
| 246682_at   | A15g35250 | protein cholesteryl-2C PP2C-like - s protein cholesteryl-2C, putative / PP2C          | 215  | 163  | 221  | 240  | 256  | 191  | 206  | 229  | 0.90     | 0.219848 | 162  | 159  | 208  | 188  | 227  | 208  | 163  | 208  | 163  | 199  | 0.88  | 0.023910 | 199  | 0.80  | 0.021912 |
| 246683_at   | A11g48920 | nuM1 protein, putative similar to nuM1 nucleolin, putative                            | 2593 | 2971 | 3187 | 3428 | 3667 | 3214 | 2857 | 3436 | 0.83     | 0.056754 | 2370 | 2161 | 2404 | 3101 | 2512 | 2266 | 3056 | 3005 | 2311 | 2788 | 0.83  | 0.084695 | 2626 | 0.88  | 0.291149 |
| 246684_at   | A11g48910 | flavin-containing monooxygenase, puta flavin-containing monooxygenase family          | 20   | 25   | 34   | 28   | 32   | 31   | 26   | 31   | 0.86     | 0.389452 | 23   | 19   | 28   | 22   | 22</ |      |      |      |      |      |       |          |      |       |          |

|        |           |                                                                                    |                                           |      |      |      |      |      |      |      |      |           |           |          |      |      |      |      |      |      |      |      |          |          |          |          |          |          |          |
|--------|-----------|------------------------------------------------------------------------------------|-------------------------------------------|------|------|------|------|------|------|------|------|-----------|-----------|----------|------|------|------|------|------|------|------|------|----------|----------|----------|----------|----------|----------|----------|
| 246544 | A15f15020 | transcriptional regulatory -like protein                                           | paired amphipathic helix repeat-containi  | 157  | 190  | 221  | 227  | 231  | 182  | 189  | 213  | 0.89      | 0.367715  | 120      | 102  | 124  | 159  | 129  | 107  | 138  | 143  | 115  | 135      | 0.85     | 0.157233 | 132      | 0.88     | 0.374981 |          |
| 246543 | A15f15060 | putative protein                                                                   | hyphopathic                               | 26   | 27   | 34   | 31   | 32   | 42   | 29   | 35   | 0.83      | 0.239675  | 21       | 26   | 29   | 17   | 20   | 23   | 31   | 25   | 25   | 23       | 1.09     | 0.570315 | 20       | 1.27     | 0.148289 |          |
| 246544 | A15f15100 | auxin transport protein - like auxin tran auxin efflux carrier family protein      |                                           | 27   | 36   | 39   | 45   | 60   | 45   | 34   | 50   | 0.68      | 0.058157  | 38       | 38   | 45   | 58   | 41   | 42   | 50   | 42   | 40   | 47       | 0.86     | 0.222871 | 47       | 0.85     | 0.314843 |          |
| 246545 | A15f15140 | pectate lyase -like protein pectate lyase family protein                           |                                           | 21   | 21   | 21   | 21   | 21   | 21   | 21   | 21   | 1.06      | 0.610171  | 8        | 14   | 16   | 12   | 13   | 13   | 14   | 12   | 13   | 0.96     | 0.784918 | 14       | 0.96     | 0.244266 |          |          |
| 246546 | A15f15090 | lysine-dependent anion-selective chan. prot., outative / voltage-dependent anion   |                                           | 1228 | 1354 | 1337 | 1527 | 1540 | 1292 | 1306 | 1453 | 0.90      | 0.177551  | 1298     | 1232 | 1505 | 1820 | 1456 | 1314 | 1383 | 1293 | 1345 | 1453     | 0.93     | 0.474487 | 1530     | 0.88     | 0.342396 |          |
| 246547 | A15f14970 | seed maturation -like protein seed mat expressed protein                           |                                           | 170  | 200  | 225  | 248  | 264  | 200  | 237  | 0.84 | 0.215407  | 228       | 218      | 241  | 348  | 270  | 251  | 271  | 293  | 229  | 287  | 0.80     | 0.045623 | 290      | 0.79     | 0.171406 |          |          |
| 246548 | A15f14910 | putative protein - supported by full-length heavy-metal-associated domain-contain  |                                           | 411  | 713  | 571  | 483  | 556  | 399  | 565  | 479  | 1.18      | 0.432931  | 636      | 782  | 621  | 743  | 580  | 624  | 693  | 666  | 680  | 661      | 1.03     | 0.741544 | 649      | 1.05     | 0.689950 |          |
| 246549 | A15f15050 | putative protein - supported by full-length heavy-metal-associated domain-contain  |                                           | 110  | 215  | 117  | 108  | 122  | 109  | 117  | 108  | 0.59      | 0.037055  | 82       | 90   | 89   | 102  | 105  | 128  | 125  | 125  | 128  | 105      | 0.85     | 0.035498 | 165      | 0.92     | 0.045436 |          |
| 246550 | A15f14920 | outative protein predicted protein. Arab gibberellin-regulated family protein      |                                           | 3298 | 3225 | 3110 | 1593 | 1949 | 1562 | 3211 | 1701 | 1.89      | 0.000371  | 2394     | 2454 | 1823 | 1720 | 1577 | 1526 | 2327 | 2178 | 2224 | 1865     | 1.19     | 0.220304 | 1607     | 1.38     | 0.042147 |          |
| 246551 | A15f15070 | outative protein predicted proteins. Aex expressed protein                         |                                           | 112  | 143  | 140  | 139  | 182  | 118  | 132  | 146  | 0.90      | 0.529784  | 78       | 61   | 79   | 111  | 83   | 82   | 87   | 76   | 73   | 88       | 0.83     | 0.152826 | 92       | 0.79     | 0.162611 |          |
| 246552 | A15f15420 | putative protein                                                                   | circadian clock coupling factor-related   | 23   | 25   | 26   | 28   | 27   | 26   | 25   | 27   | 0.91      | 0.096100  | 22       | 20   | 27   | 20   | 27   | 20   | 25   | 26   | 23   | 22       | 1.02     | 0.853006 | 21       | 1.09     | 0.549444 |          |
| 246553 | A15f15440 | outative protein                                                                   | circadian clock coupling factor-related   | 242  | 283  | 349  | 358  | 396  | 295  | 285  | 360  | 0.84      | 0.0619016 | 314      | 308  | 346  | 461  | 376  | 370  | 325  | 323  | 376  | 0.86     | 0.155185 | 402      | 0.80     | 0.068932 |          |          |
| 246554 | A15f15450 | HSP100/GDa. putative similar to HSP                                                | heat shock protein 100, putative / HSP1   | 266  | 327  | 374  | 480  | 460  | 399  | 319  | 473  | 0.67      | 0.044666  | 282      | 247  | 328  | 519  | 382  | 305  | 331  | 328  | 398  | 373      | 0.77     | 0.159049 | 402      | 0.71     | 0.166668 |          |
| 246555 | A15f15470 | putative protein 68 kDa protein - Cicer glycosyl transferase family 8 protein      |                                           | 59   | 69   | 70   | 73   | 87   | 70   | 66   | 77   | 0.86      | 0.171269  | 55       | 48   | 65   | 80   | 63   | 52   | 66   | 60   | 56   | 64       | 0.87     | 0.277202 | 65       | 0.86     | 0.394438 |          |
| 246556 | A15f15480 | putative protein hyphopathic protein F2 zinc finger (C2H2 type) family protein     |                                           | 19   | 23   | 19   | 22   | 22   | 20   | 21   | 0.95 | 0.673055  | 19        | 17       | 25   | 24   | 23   | 19   | 18   | 20   | 21   | 0.98 | 0.878934 | 22       | 0.92     | 0.506900 |          |          |          |
| 246557 | A15f15510 | outative protein hyphopathic protein T1 expressed protein                          |                                           | 311  | 153  | 139  | 157  | 180  | 129  | 141  | 155  | 0.91      | 0.426937  | 143      | 118  | 155  | 174  | 172  | 130  | 157  | 152  | 138  | 157      | 0.88     | 0.208440 | 159      | 0.87     | 0.316827 |          |
| 246558 | A15f15540 | outative protein                                                                   |                                           | 126  | 170  | 133  | 217  | 211  | 160  | 213  | 0.78 | 0.0391063 | 125       | 105      | 140  | 165  | 126  | 170  | 154  | 123  | 165  | 146  | 1.08     | 0.570591 | 171      | 1.02     | 0.098421 |          |          |
| 246559 | A15f15550 | outative protein YTM1 - Homo sapiens transducin family protein / WD-40 repeat      |                                           | 302  | 380  | 390  | 442  | 360  | 350  | 403  | 0.87 | 0.205904  | 311       | 311      | 354  | 464  | 371  | 368  | 403  | 389  | 325  | 399  | 0.82     | 0.027742 | 401      | 0.81     | 0.094130 |          |          |
| 246560 | A15f15560 | putative protein hyphopathic protein F1 hyphopathic protein                        |                                           | 34   | 38   | 41   | 39   | 44   | 39   | 38   | 41   | 0.93      | 0.368856  | 37       | 30   | 36   | 35   | 30   | 29   | 31   | 37   | 34   | 32       | 1.07     | 0.433846 | 31       | 1.10     | 0.305050 |          |
| 246561 | A15f15570 | putative protein hyphopathic protein F1 expressed protein                          |                                           | 203  | 286  | 265  | 273  | 292  | 248  | 251  | 271  | 0.93      | 0.520716  | 277      | 295  | 311  | 371  | 275  | 293  | 257  | 247  | 294  | 288      | 1.02     | 0.858030 | 313      | 0.94     | 0.576846 |          |
| 246562 | A15f15580 | putative protein unknown protein F14F expressed protein                            |                                           | 137  | 361  | 322  | 356  | 396  | 319  | 333  | 357  | 0.93      | 0.413926  | 379      | 304  | 383  | 422  | 381  | 302  | 401  | 402  | 355  | 381      | 0.93     | 0.465658 | 368      | 0.97     | 0.763201 |          |
| 246563 | A15f15590 | putative protein                                                                   | putative protein                          | 14   | 17   | 21   | 21   | 21   | 25   | 17   | 22   | 0.78      | 0.136306  | 18       | 24   | 23   | 21   | 17   | 20   | 20   | 18   | 22   | 19       | 1.15     | 0.131258 | 19       | 1.15     | 0.256106 |          |
| 246564 | A15f15610 | outative protein hyphopathic protein F1 proteasome family protein                  |                                           | 543  | 727  | 716  | 719  | 810  | 636  | 662  | 722  | 0.92      | 0.487706  | 593      | 569  | 621  | 820  | 664  | 604  | 668  | 645  | 594  | 680      | 0.87     | 0.138401 | 606      | 0.85     | 0.199094 |          |
| 246565 | A15f15530 | biotin carboxyl carrier protein oncosucco biotin carboxyl carrier protein 2 (BCCP2 |                                           | 112  | 182  | 141  | 262  | 267  | 213  | 145  | 248  | 0.59      | 0.018265  | 164      | 173  | 189  | 372  | 267  | 249  | 250  | 250  | 175  | 277      | 0.63     | 0.018973 | 296      | 0.59     | 0.036369 |          |
| 246566 | A15f15520 | 40S RIBOSOMAL PROTEIN S19 - like 40S ribosomal protein S19 (RPS19B)                |                                           | 772  | 1013 | 1081 | 958  | 1105 | 948  | 955  | 1016 | 0.94      | 0.559389  | 770      | 866  | 826  | 1144 | 901  | 839  | 895  | 877  | 821  | 949      | 0.86     | 0.113941 | 995      | 0.82     | 0.093216 |          |
| 246569 | A15f15460 | putative protein desarvylated/ant des expressed protein                            |                                           | 341  | 452  | 406  | 447  | 535  | 416  | 400  | 466  | 0.86      | 0.241131  | 367      | 375  | 402  | 551  | 430  | 402  | 403  | 404  | 381  | 438      | 0.87     | 0.197824 | 461      | 0.83     | 0.165562 |          |
| 246540 | A15f15600 | nitrilase associated protein-like nitrilase expressed protein                      |                                           | 143  | 137  | 161  | 143  | 136  | 113  | 147  | 130  | 1.13      | 0.223902  | 92       | 86   | 135  | 156  | 117  | 92   | 101  | 98   | 104  | 113      | 0.92     | 0.673969 | 122      | 0.86     | 0.154715 |          |
| 246541 | A15f15400 | ubiquitin-ligase degradation protein-like U-box domain-containing protein          |                                           | 418  | 486  | 481  | 581  | 628  | 488  | 462  | 566  | 0.82      | 0.088742  | 415      | 302  | 428  | 565  | 467  | 386  | 460  | 445  | 382  | 463      | 0.82     | 0.144162 | 470      | 0.81     | 0.249279 |          |
| 246510 | A15f15410 | cyclic nucleotide-ated cation channel                                              | cyclic nucleotide-regulated ion channel / | 164  | 231  | 224  | 191  | 226  | 196  | 206  | 204  | 1.01      | 0.828715  | 328      | 343  | 316  | 390  | 324  | 324  | 253  | 415  | 395  | 329      | 0.93     | 0.532566 | 322      | 1.02     | 0.880496 |          |
| 246511 | A15f15400 | UDP-glucose dehydrogenase-like prot UDP-glucose 6-dehydrogenase. outative          |                                           | 251  | 237  | 207  | 263  | 293  | 263  | 293  | 290  | 0.84      | 0.024769  | 219      | 195  | 256  | 276  | 205  | 208  | 171  | 164  | 192  | 207      | 1.08     | 0.570591 | 171      | 1.02     | 0.098421 |          |
| 246512 | A15f15630 | putative phychoelatin synthase puta phychoelatin synthase family protein /         |                                           | 43   | 50   | 68   | 67   | 63   | 53   | 66   | 81   | 0.57      | 0.172069  | 47       | 51   | 54   | 54   | 54   | 47   | 50   | 52   | 50   | 49       | 1.02     | 0.721708 | 48       | 1.04     | 0.603742 |          |
| 246513 | A15f15680 | outative protein                                                                   | expressed protein                         | 264  | 359  | 354  | 411  | 449  | 332  | 326  | 397  | 0.82      | 0.198524  | 252      | 210  | 263  | 340  | 283  | 234  | 305  | 307  | 242  | 294      | 0.82     | 0.093710 | 285      | 0.85     | 0.274834 |          |
| 246514 | A15f15700 | DNA-directed RNA polymerase (mitoch DNA-directed RNA polymerase (RPOT2             |                                           | 90   | 117  | 126  | 138  | 135  | 127  | 111  | 133  | 0.83      | 0.122526  | 83       | 77   | 100  | 109  | 93   | 82   | 93   | 92   | 87   | 94       | 0.93     | 0.394941 | 94       | 0.92     | 0.497504 |          |
| 246515 | A15f15710 | outative protein unusual floral orens c f-box family protein                       |                                           | 126  | 170  | 183  | 217  | 211  | 160  | 204  | 0.78 | 0.0391063 | 125       | 105      | 140  | 165  | 126  | 170  | 154  | 123  | 165  | 146  | 1.08     | 0.570591 | 171      | 1.02     | 0.098421 |          |          |
| 246516 | A15f15740 | outative protein auxin-independent ore expressed protein                           |                                           | 69   | 90   | 86   | 101  | 103  | 84   | 82   | 96   | 0.85      | 0.186222  | 61       | 55   | 84   | 77   | 56   | 44   | 54   | 51   | 67   | 56       | 1.19     | 0.334039 | 59       | 1.13     | 0.589940 |          |
| 246517 | A15f15760 | ribosomal protein 3 creuscor-like prot alstad-specific 30S ribosomal protein 3.    |                                           | 87   | 102  | 109  | 123  | 130  | 109  | 99   | 121  | 0.82      | 0.076047  | 99       | 102  | 116  | 154  | 117  | 110  | 117  | 110  | 107  | 106      | 1.12     | 0.241332 | 127      | 0.83     | 0.212893 |          |
| 246518 | A15f15770 | acetyltransferase-like protein Glucosar GCN5-related N-acetyltransferase (GNA      |                                           | 110  | 147  | 142  | 170  | 164  | 153  | 133  | 162  | 0.82      | 0.082010  | 104      | 122  | 124  | 176  | 139  | 133  | 152  | 136  | 117  | 147      | 0.79     | 0.038369 | 149      | 0.78     | 0.094982 |          |
| 246519 | A15f15780 | putative protein other protein-like or protein Ole 1 allergen and extensin fam     |                                           | 13   | 14   | 11   | 12   | 11   | 11   | 14   | 11   | 1.26      | 0.023703  | 11       | 11   | 15   | 12   | 12   | 12   | 12   | 12   | 12   | 14       | 0.82     | 0.447637 | 12       | 1.01     | 0.098421 |          |
| 246520 | A15f15790 | putative protein RING-H2 finger protein zinc finger (C3HC4-type RING finger) fa    |                                           | 32   | 44   | 38   | 57   | 59   | 45   | 38   | 54   | 0.71      | 0.044858  | 33       | 36   | 37   | 67   | 41   | 43   | 42   | 34   | 36   | 46       | 0.78     | 0.223400 | 50       | 0.70     | 0.141082 |          |
| 246521 | A15f15810 | N22-dimethyluouanine RNA methyltr. N2,N2-dimethyluouanine RNA methyl               |                                           | 325  | 396  | 443  | 404  | 455  | 344  | 388  | 401  | 0.97      | 0.799687  | 293      | 226  | 274  | 316  | 268  | 233  | 277  | 266  | 264  | 272      | 0.97     | 0.743749 | 273      | 0.97     | 0.806901 |          |
| 246522 | A15f15830 | bZIP DNA-binding protein-like outative bZIP DNA-binding protein-like outative I    |                                           | 262  | 391  | 431  | 268  | 38   | 29   | 30   | 32   | 0.93      | 0.571815  | 25       | 25   | 24   | 32   | 20   | 22   | 25   | 27   | 25   | 25       | 0.99     | 0.908061 | 24       | 1.01     | 0.934654 |          |
| 246523 | A15f15850 | CONSTANS-like 1 - zinc finger protein CONSTANS-LIKE 1 i                            |                                           | 63   | 110  | 116  | 88   | 114  | 66   | 73   | 84   | 1.02      | 0.53      | 0.722845 | 61   | 73   | 76   | 145  | 96   | 86   | 71   | 71   | 70       | 145      | 0.96     | 0.326833 | 106      | 0.85     | 0.167189 |
| 246524 | A15f15860 | Carbonylexpress-like protein strol ore expressed protein                           |                                           | 187  | 223  | 271  | 260  | 252  | 209  | 261  | 288  | 0.77      | 0.012761  | 164      | 173  | 188  | 231  | 186  | 163  | 193  | 180  | 163  | 187      | 0.93     | 0.451086 | 187      | 0.94     | 0.638466 |          |
| 246525 | A15f15840 | CONSTANS - supported by full-length / hypothetical protein /// zinc finger protein |                                           | 74   | 84   | 74   | 84   | 94   | 85   | 77   | 88   | 0.88      | 0.078126  | 78       | 75   | 88   | 104  | 75   | 79   | 58   | 59   | 80   | 75       | 1.07     | 0.655306 | 86       | 0.93     | 0.596737 |          |
| 246526 | A15f15720 | putative protein RFX26 - Arabidopsis II GDSL-motif lipase/hydrolase family prot    |                                           | 429  | 619  | 512  | 619  | 471  | 389  | 534  | 0.73 | 0.070907  | 239       | 188      | 298  | 424  | 322  | 295  | 241  | 225  | 242  | 301  | 0.80     | 0.296150 | 347      | 0.70     | 0.103822 |          |          |
| 246527 | A15f15750 | ribosomal protein-like 40S RIBOSOMAL RNA-binding N4 domain-containing ore          |                                           | 530  | 609  | 673  | 788  | 846  | 661  | 604  | 765  | 0.79      | 0.078818  | 684      | 660  | 777  | 1095 | 887  | 825  | 821  | 835  | 797  | 893      | 0.79     | 0.046099 | 936      | 0.76     | 0.061944 |          |
| 246528 | A15f15760 | outative mitochondrial carrier protein h mitochondrial substrate carrier family or |                                           | 185  | 214  | 231  | 276  | 318  | 185  | 214  | 276  |           |           |          |      |      |      |      |      |      |      |      |          |          |          |          |          |          |          |

|             |           |                                                                                      |     |     |      |     |     |     |     |      |          |          |     |     |     |     |     |     |     |      |          |     |      |          |          |      |          |          |
|-------------|-----------|--------------------------------------------------------------------------------------|-----|-----|------|-----|-----|-----|-----|------|----------|----------|-----|-----|-----|-----|-----|-----|-----|------|----------|-----|------|----------|----------|------|----------|----------|
| 246454_at   | A15g16710 | Expressed protein ; supported by full-length dehydroascorbate reductase, putative    | 205 | 315 | 318  | 340 | 389 | 307 | 279 | 345  | 0.81     | 0.210147 | 302 | 419 | 391 | 526 | 382 | 352 | 405 | 401  | 371      | 413 | 0.90 | 0.402515 | 420      | 0.88 | 0.485520 |          |
| 246455_at   | A15g16790 | putative protein predicted protein F1-3e expressed protein                           | 59  | 68  | 75   | 69  | 82  | 60  | 67  | 70   | 0.95     | 0.698407 | 74  | 74  | 81  | 99  | 82  | 73  | 80  | 76   | 76       | 82  | 0.93 | 0.399366 | 85       | 0.90 | 0.330841 |          |
| 246456_at   | A15g16850 | telomerase reverse transcriptase ; telomerase reverse transcriptase (TERT)           | 25  | 31  | 29   | 32  | 33  | 25  | 28  | 30   | 0.95     | 0.635675 | 22  | 15  | 21  | 23  | 21  | 22  | 24  | 19   | 19       | 22  | 0.89 | 0.284675 | 22       | 0.89 | 0.334367 |          |
| 246457_at   | A15g16850 | WD40-repeat protein transducin beta gamma subunit 1 (WD-40 repeat                    | 191 | 247 | 244  | 255 | 278 | 197 | 231 | 244  | 0.95     | 0.617503 | 188 | 173 | 178 | 205 | 166 | 156 | 175 | 175  | 168      | 175 | 0.91 | 0.615681 | 175      | 0.91 | 0.615681 |          |
| 246458_at   | A15g16860 | putative protein various predicted prot telomerase co-receptor (PPR) repeat-containi | 26  | 28  | 31   | 32  | 37  | 31  | 28  | 33   | 0.85     | 0.086290 | 24  | 23  | 30  | 24  | 27  | 26  | 24  | 22   | 26       | 25  | 1.04 | 0.603067 | 26       | 1.01 | 0.947481 |          |
| 246459_at   | A15g16900 | receptor protein kinase -like protein se leucine-rich repeat protein kinase, puta    | 16  | 18  | 30   | 28  | 25  | 29  | 31  | 27   | 0.79     | 0.270171 | 19  | 19  | 24  | 19  | 14  | 19  | 22  | 20   | 21       | 19  | 1.11 | 0.345903 | 17       | 1.21 | 0.184546 |          |
| 246460_at   | A15g16910 | cellulose synthase catalytic subunit -lik cellulose synthase family protein          | 308 | 281 | 415  | 400 | 409 | 337 | 338 | 382  | 0.88     | 0.383736 | 243 | 204 | 255 | 289 | 273 | 213 | 312 | 290  | 234      | 275 | 0.85 | 0.151908 | 258      | 0.91 | 0.435803 |          |
| 246461_at   | A15g16920 | 62 family domain 5b A-type family protein                                            | 52  | 69  | 64   | 95  | 77  | 61  | 89  | 67   | 0.81     | 0.016476 | 51  | 51  | 60  | 67  | 64  | 59  | 54  | 72   | 63       | 54  | 0.84 | 0.045729 | 68       | 0.90 | 0.456535 |          |
| 246462_at   | A15g16940 | putative protein predicted protein, Dros expressed protein                           | 88  | 113 | 128  | 135 | 150 | 121 | 110 | 135  | 0.81     | 0.153451 | 99  | 119 | 110 | 183 | 149 | 123 | 117 | 110  | 109      | 136 | 0.80 | 0.195506 | 151      | 0.72 | 0.083350 |          |
| 246463_at   | A15g16970 | quinone oxidoreductase -like protein o NADP-dependent oxidoreductase, outat          | 66  | 68  | 85   | 87  | 67  | 74  | 73  | 76   | 0.96     | 0.715527 | 85  | 96  | 113 | 63  | 65  | 67  | 70  | 71   | 98       | 67  | 1.46 | 0.002831 | 65       | 1.51 | 0.015565 |          |
| 246464_at   | A15g16980 | quinone oxidoreductase -like protein o NADP-dependent oxidoreductase, outat          | 20  | 23  | 29   | 30  | 23  | 24  | 24  | 26   | 0.95     | 0.704800 | 25  | 28  | 32  | 19  | 22  | 21  | 22  | 22   | 28       | 21  | 1.32 | 0.009250 | 21       | 1.36 | 0.034439 |          |
| 246465_at   | A15g17000 | putative protein predicted protein, Dros expressed protein                           | 195 | 227 | 278  | 185 | 206 | 164 | 233 | 185  | 0.95     | 0.701622 | 191 | 182 | 193 | 184 | 139 | 140 | 173 | 166  | 189      | 160 | 1.18 | 0.058818 | 154      | 1.22 | 0.057529 |          |
| 246466_at   | A15g17010 | sugar transporter - like protein D-XVLC sugar transporter family protein             | 223 | 308 | 352  | 593 | 499 | 460 | 294 | 518  | 0.57     | 0.100120 | 250 | 223 | 260 | 290 | 596 | 416 | 347 | 330  | 329      | 244 | 403  | 0.96     | 0.057890 | 453  | 0.94     | 0.049928 |
| 246467_at   | A15g17040 | UDP glucose-flavonoid 3-o-glucosyltra UDP-glucuronosyl(UDP-glucosyl) transfe         | 86  | 100 | 117  | 122 | 124 | 120 | 101 | 122  | 0.83     | 0.074807 | 62  | 65  | 80  | 95  | 74  | 71  | 109 | 99   | 69       | 90  | 0.77 | 0.097205 | 80       | 0.86 | 0.282638 |          |
| 246468_at   | A15g17050 | UDP glucose-flavonoid 3-o-glucosyltra UDP-glucuronosyl(UDP-glucosyl) transfe         | 78  | 104 | 123  | 152 | 148 | 119 | 102 | 140  | 0.73     | 0.081860 | 51  | 48  | 61  | 145 | 97  | 82  | 100 | 74   | 53       | 100 | 0.54 | 0.033268 | 108      | 0.49 | 0.048206 |          |
| 246469_at   | A15g17070 | putative protein predicted protein, Dros expressed protein                           | 218 | 253 | 277  | 306 | 373 | 262 | 249 | 314  | 0.79     | 0.151340 | 236 | 275 | 284 | 448 | 336 | 326 | 261 | 259  | 265      | 326 | 0.81 | 0.244216 | 370      | 0.72 | 0.066106 |          |
| 246470_at   | A15g17080 | putative protein predicted protein, Arab thymothelial protein                        | 15  | 12  | 19   | 17  | 15  | 21  | 16  | 18   | 0.88     | 0.405849 | 10  | 13  | 15  | 12  | 14  | 10  | 16  | 14   | 13       | 13  | 0.98 | 0.913769 | 12       | 1.09 | 0.605803 |          |
| 246471_s_at | A15g17100 | putative protein predicted proteins, Ars thymothelial protein /// hypoethelial orote | 484 | 593 | 649  | 776 | 846 | 680 | 575 | 767  | 0.75     | 0.041849 | 458 | 507 | 493 | 742 | 540 | 541 | 526 | 506  | 486      | 571 | 0.85 | 0.198000 | 608      | 0.80 | 0.151012 |          |
| 246472_at   | A15g17130 | putative protein predicted protein, Arab thymothelial protein                        | 59  | 68  | 113  | 80  | 84  | 85  | 80  | 83   | 0.96     | 0.853233 | 66  | 71  | 90  | 34  | 27  | 39  | 38  | 34   | 75       | 34  | 2.20 | 0.000487 | 33       | 2.27 | 0.006390 |          |
| 246473_at   | A15g17140 | putative protein cathepsin L-like cytosolic proteinase-related                       | 15  | 19  | 30   | 13  | 15  | 16  | 21  | 14   | 1.47     | 0.206900 | 46  | 58  | 65  | 12  | 15  | 9   | 12  | 14   | 56       | 12  | 4.52 | 0.000042 | 12       | 4.66 | 0.001421 |          |
| 246474_at   | A15g17150 | putative protein predicted protein, Arab thymothelial protein                        | 26  | 33  | 41   | 38  | 45  | 35  | 33  | 39   | 0.85     | 0.321786 | 41  | 48  | 41  | 56  | 39  | 35  | 47  | 43   | 43       | 44  | 0.98 | 0.884984 | 43       | 1.00 | 0.984885 |          |
| 246415_at   | A15g17160 | putative protein (fragment) predicted o expressed protein                            | 233 | 267 | 230  | 279 | 260 | 238 | 243 | 269  | 0.91     | 0.271857 | 218 | 198 | 249 | 317 | 284 | 231 | 256 | 223  | 222      | 262 | 0.85 | 0.165962 | 277      | 0.80 | 0.128321 |          |
| 246416_at   | A15g16920 | putative protein predicted proteins, Ars expressed protein                           | 15  | 22  | 22   | 22  | 20  | 19  | 20  | 20   | 0.97     | 0.836996 | 13  | 12  | 17  | 17  | 12  | 14  | 19  | 13   | 14       | 15  | 0.95 | 0.717262 | 15       | 0.97 | 0.869645 |          |
| 246417_at   | A15g16990 | quinone oxidoreductase - like protein c NADP-dependent oxidoreductase, outat         | 411 | 436 | 516  | 719 | 756 | 643 | 454 | 706  | 0.64     | 0.005419 | 444 | 418 | 520 | 856 | 669 | 579 | 540 | 496  | 461      | 628 | 0.73 | 0.105595 | 701      | 0.66 | 0.050951 |          |
| 246418_at   | A15g16990 | quinone oxidoreductase -like protein o NADP-dependent oxidoreductase, putat          | 48  | 59  | 68   | 70  | 67  | 61  | 58  | 66   | 0.88     | 0.285419 | 46  | 39  | 59  | 52  | 40  | 42  | 51  | 43   | 48       | 46  | 1.06 | 0.633332 | 45       | 1.08 | 0.640181 |          |
| 246419_at   | A15g17030 | UDP glucose-flavonoid 3-o-glucosyltra UDP-glucuronosyl(UDP-glucosyl) transfe         | 21  | 22  | 36   | 35  | 29  | 32  | 26  | 32   | 0.83     | 0.345235 | 21  | 27  | 26  | 26  | 18  | 26  | 24  | 22   | 25       | 23  | 1.07 | 0.529841 | 23       | 1.07 | 0.665440 |          |
| 246420_at   | A15g16870 | putative protein various predicted protein expressed protein                         | 86  | 129 | 128  | 124 | 143 | 107 | 114 | 125  | 0.92     | 0.589489 | 103 | 125 | 117 | 176 | 112 | 124 | 110 | 110  | 115      | 126 | 0.91 | 0.550528 | 137      | 0.84 | 0.341918 |          |
| 246421_at   | A15g16880 | TOM (target of mw1)-like protein TOM VH5 domain-containing protein / GAT d           | 707 | 908 | 1033 | 864 | 942 | 745 | 883 | 850  | 1.04     | 0.784889 | 755 | 752 | 785 | 932 | 883 | 735 | 901 | 898  | 764      | 870 | 0.88 | 0.065058 | 850      | 0.90 | 0.227220 |          |
| 246422_at   | A15g17060 | ADP-H+-bifunctional factor - like protein AC ADP-bifunctional factor, putative       | 128 | 150 | 176  | 215 | 237 | 196 | 151 | 216  | 0.70     | 0.024739 | 138 | 162 | 163 | 255 | 194 | 171 | 181 | 0.81 | 0.158443 | 230 | 0.75 | 0.117404 |          |      |          |          |
| 246423_at   | A15g17020 | putative protein ribosomal protein L18, expressed protein                            | 140 | 142 | 203  | 213 | 203 | 142 | 205 | 0.73 | 0.080506 | 117      | 149 | 138 | 154 | 131 | 136 | 178 | 142 | 138  | 151      | 136 | 0.78 | 0.133801 | 162      | 0.81 | 0.327072 |          |
| 246424_at   | A15g17020 | Exportin1 (XP01) protein ; supported t exportin1 (XP01)                              | 378 | 531 | 527  | 616 | 693 | 503 | 479 | 604  | 0.79     | 0.167997 | 304 | 285 | 347 | 433 | 270 | 290 | 352 | 363  | 312      | 362 | 0.86 | 0.183367 | 364      | 0.86 | 0.309588 |          |
| 246425_at   | A15g17420 | cellulose synthase catalytic subunit (IR cellulose synthase, catalytic subunit (IR   | 46  | 37  | 52   | 58  | 76  | 60  | 48  | 65   | 0.75     | 0.051692 | 33  | 27  | 41  | 48  | 38  | 36  | 41  | 37   | 34       | 40  | 0.84 | 0.189926 | 41       | 0.83 | 0.284676 |          |
| 246426_at   | A15g17430 | ovine development protein antequer ovule development protein, putative               | 29  | 36  | 45   | 40  | 44  | 35  | 37  | 39   | 0.93     | 0.644241 | 24  | 23  | 28  | 30  | 22  | 27  | 25  | 22   | 25       | 25  | 0.98 | 0.864043 | 26       | 0.94 | 0.612935 |          |
| 246427_at   | A15g17400 | ADP/ATP translocase-like protein adp/ ATP carrier protein, mitochondrial             | 131 | 216 | 187  | 184 | 207 | 176 | 178 | 0.89 | 0.943497 | 160      | 165 | 173 | 274 | 189 | 188 | 184 | 202 | 180  | 176      | 208 | 0.85 | 0.230960 | 219      | 0.80 | 0.216803 |          |
| 246428_at   | A15g17410 | scindole core body protein-like scindole c tubulin family protein, mitochondrial     | 134 | 169 | 164  | 179 | 191 | 144 | 156 | 171  | 0.91     | 0.437558 | 114 | 104 | 125 | 142 | 128 | 104 | 134 | 125  | 114      | 126 | 0.91 | 0.260308 | 124      | 0.92 | 0.476467 |          |
| 246429_at   | A15g17450 | farnesylated protein ATPF6-like protein heavy-metal-associated domain-contain        | 20  | 26  | 31   | 27  | 33  | 30  | 26  | 30   | 0.87     | 0.319524 | 23  | 19  | 24  | 24  | 25  | 22  | 34  | 27   | 22       | 26  | 0.84 | 0.199771 | 24       | 0.93 | 0.467176 |          |
| 246430_at   | A15g17470 | calmodulin-like protein calmodulin-rela calmodulin-related protein, putative         | 28  | 33  | 49   | 51  | 46  | 47  | 37  | 48   | 0.77     | 0.167473 | 23  | 20  | 26  | 21  | 22  | 21  | 34  | 24   | 23       | 24  | 0.94 | 0.891149 | 21       | 1.07 | 0.465566 |          |
| 246431_at   | A15g17480 | calcium-binding protein calcium binding protein / calcium-binding prot               | 10  | 11  | 12   | 10  | 12  | 10  | 11  | 10   | 1.23     | 0.450539 | 7   | 7   | 8   | 8   | 9   | 3   | 11  | 7    | 6        | 8   | 1.05 | 0.845199 | 8        | 0.99 | 0.994125 |          |
| 246432_at   | A15g17490 | RGA-like protein putative member of th RGA-like protein putative member of th        | 22  | 39  | 43   | 33  | 33  | 31  | 35  | 32   | 1.08     | 0.695557 | 15  | 17  | 20  | 17  | 19  | 20  | 18  | 14   | 17       | 18  | 0.99 | 0.947057 | 19       | 0.94 | 0.524621 |          |
| 246433_at   | A15g17510 | the glutamine-rich protein predicted protein expressed protein                       | 97  | 147 | 147  | 186 | 192 | 166 | 130 | 181  | 0.72     | 0.051172 | 144 | 163 | 148 | 259 | 163 | 175 | 160 | 156  | 152      | 183 | 0.83 | 0.283993 | 199      | 0.76 | 0.201923 |          |
| 246434_at   | A15g17520 | root cap 1 (RCP1) ; supported by full-length root cap 1 (RCP1)                       | 209 | 266 | 305  | 317 | 395 | 290 | 260 | 334  | 0.78     | 0.152911 | 293 | 274 | 298 | 458 | 350 | 339 | 373 | 342  | 288      | 372 | 0.77 | 0.031466 | 382      | 0.75 | 0.071987 |          |
| 246435_at   | A15g17460 | hypothetical protein ; supported by CD expressed protein                             | 18  | 21  | 25   | 27  | 28  | 29  | 21  | 26   | 0.76     | 0.026140 | 23  | 26  | 24  | 29  | 23  | 24  | 21  | 22   | 24       | 24  | 1.03 | 0.275282 | 25       | 0.97 | 0.698025 |          |
| 246436_at   | A15g17440 | putative protein capelin resistance-as LUC7 N terminus domain-containing on          | 228 | 274 | 224  | 282 | 247 | 251 | 248 | 279  | 0.99     | 0.920568 | 264 | 279 | 322 | 360 | 302 | 263 | 320 | 322  | 279      | 312 | 0.89 | 0.151237 | 308      | 0.91 | 0.358909 |          |
| 246437_at   | A15g17540 | putative protein hypersensitivity-related transferase family protein                 | 27  | 30  | 41   | 47  | 41  | 43  | 33  | 44   | 0.75     | 0.078727 | 21  | 19  | 22  | 25  | 20  | 20  | 22  | 21   | 21       | 22  | 0.96 | 0.545305 | 22       | 0.96 | 0.653903 |          |
| 246438_at   | A15g17580 | putative protein non-phototropic high-phototropic-responsive NPH3 family pr          | 34  | 50  | 50   | 56  | 48  | 49  | 44  | 51   | 0.87     | 0.336380 | 37  | 29  | 42  | 45  | 40  | 32  | 42  | 43   | 36       | 40  | 0.89 | 0.328185 | 39       | 0.92 | 0.612699 |          |
| 246439_at   | A15g17600 | RING-H2 zinc finger protein RING- zinc finger (C3HC4-type RING finger) fa            | 39  | 53  | 53   | 56  | 58  | 42  | 59  | 71   | 0.87     | 0.087630 | 33  | 32  | 47  | 66  | 41  | 48  | 62  | 48   | 37       | 53  | 0.71 | 0.074186 | 52       | 0.73 | 0.185508 |          |
| 246440_at   | A15g17650 | chlorine-rich protein chlorine-rich glycine-rich protein                             | 107 | 153 | 152  | 138 | 139 | 102 | 118 | 107  | 0.74     | 0.105891 | 117 | 149 | 167 | 183 | 156 | 128 | 167 | 156  | 128      | 161 | 0.83 | 0.181818 | 162      | 0.86 | 0.141498 |          |
| 246441_at   | A15g17560 | putative protein ; supported by full-length B6A-like family protein                  | 544 | 546 | 574  | 594 | 622 | 539 | 515 | 585  | 0.88     | 0.247158 | 539 | 588 | 610 | 827 | 599 | 611 | 565 | 558  | 579      |     |      |          |          |      |          |          |

|             |            |                                           |                                              |     |     |     |     |     |     |     |     |      |          |     |     |     |     |     |     |     |     |     |      |          |          |          |          |          |          |
|-------------|------------|-------------------------------------------|----------------------------------------------|-----|-----|-----|-----|-----|-----|-----|-----|------|----------|-----|-----|-----|-----|-----|-----|-----|-----|-----|------|----------|----------|----------|----------|----------|----------|
| 246359_x_at | At1g40871  | hypothetical protein                      | cyto-v like retrotransposon family (Athila)  | 34  | 32  | 35  | 35  | 43  | 34  | 33  | 37  | 0.90 | 0.332560 | 25  | 30  | 33  | 30  | 29  | 26  | 35  | 29  | 30  | 30   | 1.00     | 0.968462 | 28       | 1.05     | 0.650775 |          |
| 246360_at   | At1g40952  | hypothetical protein                      | hypothetical protein                         | 9   | 5   | 9   | 4   | 8   | 7   | 8   | 6   | 1.25 | 0.425968 | 5   | 3   | 8   | 7   | 2   | 6   | 4   | 7   | 5   | 6    | 0.86     | 0.511480 | 6        | 0.81     | 0.468753 |          |
| 246361_s_at | At1g41114  | hypothetical protein                      | cyto-v like retrotransposon family (Athila)  | 10  | 16  | 17  | 19  | 15  | 12  | 14  | 15  | 0.95 | 0.817759 | 15  | 14  | 13  | 8   | 7   | 12  | 13  | 11  | 14  | 2    | 1.37     | 0.058877 | 9        | 1.52     | 0.053613 |          |
| 246362_at   | At1g41276  | hypothetical protein                      | hypothetical protein                         | 4   | 4   | 1   | 2   | 1   | 2   | 1   | 4   | 0.63 | 0.560155 | 4   | 4   | 1   | 2   | 3   | 2   | 3   | 2   | 3   | 1    | 1.08     | 0.871475 | 4        | 1.08     | 0.361344 |          |
| 246363_at   | At1g40390  | hypothetical protein                      | hypothetical protein                         | 22  | 21  | 29  | 32  | 36  | 29  | 24  | 32  | 0.73 | 0.051368 | 16  | 24  | 23  | 20  | 24  | 17  | 23  | 21  | 21  | 21   | 1.01     | 0.948821 | 20       | 1.04     | 0.793849 |          |
| 246364_at   | At1g40230  | hypothetical protein                      | hypothetical protein                         | 36  | 41  | 44  | 52  | 47  | 39  | 40  | 46  | 0.88 | 0.250718 | 36  | 45  | 49  | 41  | 32  | 32  | 55  | 50  | 43  | 42   | 1.03     | 0.866095 | 35       | 1.23     | 0.171283 |          |
| 246365_at   | At1g39750  | hypothetical protein                      | cyto-v like retrotransposon family (Athila)  | 21  | 25  | 26  | 28  | 30  | 29  | 24  | 29  | 0.82 | 0.035627 | 21  | 20  | 23  | 23  | 17  | 19  | 19  | 19  | 21  | 19   | 1.12     | 0.136860 | 20       | 1.10     | 0.384466 |          |
| 246366_at   | At1g51850  | light repressible receptor protein kinase | light repressible receptor protein kinase    | 17  | 13  | 14  | 13  | 16  | 12  | 13  | 13  | 0.96 | 0.848104 | 16  | 10  | 7   | 14  | 11  | 14  | 11  | 10  | 13  | 11   | 0.95     | 0.738396 | 12       | 0.88     | 0.388404 |          |
| 246367_at   | At1g51880  | light repressible receptor protein kinase | leucine-rich repeat protein kinase, outat    | 34  | 34  | 42  | 42  | 37  | 36  | 37  | 38  | 0.96 | 0.679148 | 26  | 25  | 30  | 31  | 26  | 28  | 34  | 31  | 27  | 30   | 0.91     | 0.254339 | 28       | 0.96     | 0.637115 |          |
| 246368_at   | At1g51890  | light repressible receptor protein kinase | leucine-rich repeat protein kinase, outat    | 12  | 13  | 20  | 15  | 19  | 16  | 15  | 16  | 0.91 | 0.626641 | 14  | 13  | 13  | 15  | 12  | 10  | 14  | 20  | 13  | 14   | 0.92     | 0.659775 | 12       | 1.07     | 0.603112 |          |
| 246369_at   | At1g51910  | light repressible receptor protein kinase | protein kinase family                        | 29  | 79  | 96  | 79  | 86  | 86  | 75  | 84  | 0.89 | 0.534960 | 48  | 57  | 61  | 47  | 57  | 55  | 70  | 68  | 56  | 59   | 0.94     | 0.571035 | 53       | 1.05     | 0.643899 |          |
| 246370_at   | At1g51920  | hypothetical protein predicted by cener   | expressed protein                            | 45  | 54  | 62  | 60  | 76  | 55  | 54  | 64  | 0.85 | 0.276144 | 45  | 55  | 58  | 42  | 43  | 39  | 66  | 47  | 42  | 47   | 0.88     | 0.475364 | 41       | 1.01     | 0.958171 |          |
| 246371_at   | At1g51940  | unknown protein contains similarity to    | protein kinase family / peptidoh             | 270 | 238 | 200 | 251 | 294 | 222 | 236 | 256 | 0.92 | 0.084474 | 192 | 187 | 189 | 220 | 207 | 155 | 250 | 246 | 186 | 216  | 0.88     | 0.230168 | 194      | 0.98     | 0.817894 |          |
| 246372_at   | At1g51900  | hypothetical protein predicted by cener   | hypothetical protein                         | 7   | 9   | 6   | 8   | 8   | 7   | 7   | 8   | 0.92 | 0.531898 | 7   | 9   | 8   | 6   | 9   | 9   | 5   | 6   | 8   | 7    | 1.19     | 0.270836 | 8        | 1.04     | 0.757351 |          |
| 246373_at   | At1g51860  | receptor-like protein kinase, putative    | si leucine-rich repeat protein kinase, putat | 27  | 24  | 35  | 37  | 39  | 37  | 29  | 38  | 0.76 | 0.055688 | 19  | 17  | 25  | 25  | 23  | 21  | 23  | 21  | 22  | 22   | 0.91     | 0.347641 | 23       | 0.90     | 0.404938 |          |
| 246374_at   | At1g51840  | light repressible receptor protein kinase | protein kinase-related                       | 13  | 17  | 22  | 21  | 24  | 18  | 18  | 21  | 0.83 | 0.321572 | 13  | 19  | 15  | 13  | 13  | 14  | 19  | 10  | 15  | 14   | 1.10     | 0.527380 | 14       | 1.13     | 0.321558 |          |
| 246375_at   | At1g51830  | light repressible receptor protein kinase | leucine-rich repeat protein kinase, putat    | 11  | 10  | 18  | 16  | 19  | 15  | 13  | 17  | 0.79 | 0.285455 | 9   | 9   | 14  | 13  | 14  | 11  | 10  | 16  | 11  | 13   | 0.83     | 0.308903 | 13       | 0.84     | 0.333021 |          |
| 246376_at   | At1g51950  | auxin regulated protein IAA18, putative   | auxin-responsive protein / indoleacetic a    | 189 | 247 | 275 | 291 | 341 | 245 | 237 | 292 | 0.81 | 0.215801 | 174 | 155 | 164 | 266 | 198 | 188 | 211 | 204 | 164 | 213  | 0.77     | 0.038720 | 217      | 0.76     | 0.100935 |          |
| 246349_at   | At1g51915  | Expressed protein ; supported by full-le  | protein-related                              | 11  | 9   | 12  | 12  | 14  | 13  | 11  | 13  | 0.82 | 0.067228 | 9   | 9   | 13  | 9   | 13  | 8   | 10  | 10  | 10  | 10   | 1.04     | 0.833130 | 9        | 1.08     | 0.622168 |          |
| 246350_at   | At1g16650  | hypothetical protein predicted by cener   | expressed protein                            | 70  | 95  | 88  | 109 | 114 | 96  | 84  | 106 | 0.79 | 0.077151 | 76  | 76  | 87  | 114 | 97  | 84  | 98  | 96  | 80  | 98   | 0.81     | 0.038862 | 99       | 0.81     | 0.115725 |          |
| 246351_at   | At1g16570  | unknown protein contains similarity to    | glycosyl transferase family 1 protein        | 311 | 414 | 435 | 462 | 517 | 389 | 387 | 456 | 0.85 | 0.263738 | 372 | 313 | 346 | 461 | 457 | 389 | 421 | 397 | 344 | 425  | 0.81     | 0.015290 | 435      | 0.79     | 0.033526 |          |
| 246320_at   | At1g16560  | unknown protein                           | Pert-like family protein                     | 246 | 327 | 332 | 335 | 380 | 302 | 301 | 339 | 0.89 | 0.357239 | 235 | 214 | 221 | 264 | 237 | 223 | 253 | 225 | 223 | 240  | 0.93     | 0.192178 | 241      | 0.93     | 0.257933 |          |
| 246321_at   | At1g16640  | unknown protein                           | transcription factor B3 family protein       | 43  | 53  | 60  | 70  | 65  | 55  | 52  | 63  | 0.83 | 0.173599 | 44  | 41  | 45  | 44  | 44  | 38  | 39  | 42  | 44  | 41   | 1.05     | 0.285324 | 42       | 1.04     | 0.548876 |          |
| 246322_at   | At1g16680  | S-locus protein, putative similar to S-to | DNA/heat shock N-terminal domain-co          | 213 | 272 | 281 | 318 | 333 | 265 | 255 | 305 | 0.84 | 0.165557 | 209 | 184 | 239 | 278 | 222 | 211 | 246 | 243 | 210 | 240  | 0.88     | 0.175151 | 237      | 0.89     | 0.364970 |          |
| 246323_at   | At1g16690  | hypothetical protein predicted by cener   | transcription factor-related                 | 115 | 156 | 132 | 165 | 158 | 144 | 134 | 156 | 0.86 | 0.196402 | 110 | 108 | 128 | 175 | 133 | 104 | 156 | 142 | 115 | 142  | 0.81     | 0.155135 | 137      | 0.84     | 0.364883 |          |
| 246324_at   | At1g16610  | arginine/serine-rich protein, putative    | SR                                           | 371 | 441 | 389 | 442 | 515 | 398 | 400 | 452 | 0.89 | 0.271353 | 402 | 393 | 402 | 545 | 468 | 420 | 495 | 465 | 399 | 479  | 0.83     | 0.026667 | 478      | 0.84     | 0.096617 |          |
| 246325_at   | At1g16540  | hypothetical protein contains similarity  | 1-molybdenum cofactor sulfase (LOSS)         | 69  | 83  | 82  | 105 | 115 | 81  | 78  | 100 | 0.78 | 0.141145 | 59  | 54  | 71  | 95  | 75  | 62  | 71  | 65  | 61  | 74   | 0.83     | 0.198222 | 77       | 0.79     | 0.215666 |          |
| 246326_at   | At1g16590  | unknown protein ; supported by cDNA:      | mitotic spindle checkpoint, outat            | 122 | 153 | 169 | 172 | 175 | 135 | 148 | 160 | 0.92 | 0.547296 | 160 | 183 | 204 | 266 | 207 | 183 | 195 | 176 | 183 | 205  | 0.89     | 0.362918 | 219      | 0.83     | 0.261620 |          |
| 246327_at   | At1g16670  | receptor-like serine/threonine kinase     | c protein kinase family                      | 69  | 82  | 105 | 98  | 98  | 75  | 87  | 94  | 0.87 | 0.187459 | 59  | 48  | 54  | 68  | 58  | 58  | 70  | 66  | 54  | 64   | 0.83     | 0.041407 | 62       | 0.87     | 0.169520 |          |
| 246328_at   | At1g45950  | putative protein hexamer-binding          | protein kinase (CHC2-type) family protein    | 320 | 334 | 320 | 332 | 336 | 320 | 324 | 342 | 0.91 | 0.068472 | 319 | 417 | 379 | 542 | 429 | 384 | 447 | 442 | 384 | 447  | 0.83     | 0.381475 | 442      | 0.93     | 0.527843 |          |
| 246329_at   | At1g343610 | putative protein gamma-tubulin interac    | tubulin family protein                       | 219 | 267 | 270 | 279 | 325 | 271 | 252 | 291 | 0.86 | 0.167681 | 244 | 200 | 259 | 327 | 286 | 220 | 290 | 276 | 234 | 280  | 0.84     | 0.135899 | 278      | 0.84     | 0.252558 |          |
| 246330_at   | At1g343600 | aldehyde oxidase ; supported by cDN       | aldehyde oxidase, putative                   | 27  | 23  | 27  | 28  | 30  | 31  | 26  | 30  | 0.88 | 0.083079 | 16  | 22  | 22  | 19  | 18  | 18  | 18  | 22  | 13  | 20   | 18       | 1.12     | 0.411060 | 18       | 1.11     | 0.375038 |
| 246331_at   | At1g44820  | non-photoreceptor hypocotyl 3-like        | photoreceptor-responsive NPH3 family pr      | 71  | 76  | 103 | 102 | 106 | 81  | 83  | 96  | 0.87 | 0.355721 | 57  | 51  | 63  | 76  | 68  | 57  | 62  | 57  | 69  | 82   | 0.82     | 0.131279 | 67       | 0.85     | 0.206527 |          |
| 246332_at   | At1g44830  | putative protein rhoadhesin-related       | lecithin:cholesterol acyltransferase fami    | 16  | 22  | 23  | 23  | 24  | 16  | 22  | 27  | 0.97 | 0.080555 | 20  | 23  | 31  | 22  | 17  | 17  | 17  | 17  | 25  | 18   | 1.38     | 0.048578 | 19       | 1.34     | 0.169094 |          |
| 246333_at   | At1g44940  | protein kinase AIP- like protein AIPP     | : S-adenosyl-L-methionine:carboxyl meth      | 22  | 13  | 16  | 16  | 18  | 12  | 13  | 15  | 0.88 | 0.466642 | 11  | 19  | 16  | 15  | 9   | 11  | 13  | 14  | 15  | 12   | 1.21     | 0.260287 | 12       | 1.28     | 0.307328 |          |
| 246334_at   | At1g44850  | putative protein serine kinase SRPK2      |                                              | 134 | 156 | 157 | 170 | 191 | 158 | 149 | 173 | 0.86 | 0.121454 | 119 | 112 | 129 | 161 | 130 | 110 | 154 | 151 | 120 | 141  | 0.85     | 0.156842 | 134      | 0.90     | 0.438916 |          |
| 246335_at   | At1g44880  | lethal leaf-spot 1 homolog Lhk1           | Rieske (2Fe-2S) domain-containing prot       | 256 | 345 | 387 | 412 | 450 | 352 | 329 | 405 | 0.81 | 0.190381 | 272 | 226 | 338 | 412 | 354 | 294 | 444 | 429 | 279 | 387  | 0.72     | 0.048862 | 353      | 0.79     | 0.186344 |          |
| 246336_at   | At1g44900  | putative protein putative integral mem    | calcium/hydrogen exchanger, putative (C      | 19  | 21  | 26  | 26  | 26  | 23  | 24  | 22  | 0.90 | 0.335574 | 18  | 20  | 22  | 18  | 18  | 22  | 22  | 21  | 18  | 22   | 1.05     | 0.313365 | 19       | 1.19     | 0.403056 |          |
| 246337_at   | At1g44910  | putative protein putative integral mem    | calcium/hydrogen exchanger, putative (C      | 21  | 33  | 34  | 35  | 37  | 40  | 29  | 37  | 0.79 | 0.150251 | 17  | 21  | 23  | 21  | 20  | 22  | 23  | 21  | 21  | 1.00 | 0.967074 | 19       | 1.06     | 0.638098 |          |          |
| 246338_s_at | At1g44930  | putative protein outative integral mem    | calcium/hydrogen exchanger, outative (C      | 43  | 48  | 67  | 58  | 65  | 63  | 52  | 62  | 0.84 | 0.263956 | 29  | 30  | 46  | 32  | 31  | 35  | 36  | 35  | 35  | 34   | 1.03     | 0.825942 | 33       | 1.07     | 0.719508 |          |
| 246339_at   | At1g44890  | RP19 gene for chloroplast ribosomal       | r 50S ribosomal protein L9, chloroplast c    | 339 | 491 | 461 | 472 | 527 | 416 | 430 | 472 | 0.91 | 0.495351 | 532 | 591 | 584 | 762 | 613 | 562 | 601 | 581 | 569 | 630  | 0.90     | 0.238876 | 656      | 0.87     | 0.199803 |          |
| 246340_s_at | At1g44860  | APP- like protein APP protein, Brassi     | S-adenosyl-L-methionine:carboxyl meth        | 37  | 45  | 55  | 61  | 61  | 48  | 57  | 61  | 0.81 | 0.173704 | 34  | 31  | 48  | 20  | 30  | 35  | 33  | 47  | 43  | 38   | 1.01     | 0.849368 | 33       | 1.16     | 0.387356 |          |
| 246341_s_at | At1g45150  | putative protein predicted proteins       | Ara pseudonine, hypothetical protein         | 19  | 21  | 35  | 29  | 30  | 29  | 30  | 25  | 0.77 | 0.074827 | 17  | 20  | 18  | 22  | 18  | 20  | 18  | 20  | 18  | 20   | 1.10     | 0.452320 | 20       | 1.08     | 0.696727 |          |
| 246342_at   | At1g56700  | putative protein male sterility protein   | 2 male sterility protein, putative           | 35  | 46  | 52  | 51  | 66  | 57  | 44  | 58  | 0.76 | 0.099927 | 32  | 28  | 36  | 32  | 30  | 29  | 26  | 29  | 32  | 29   | 1.09     | 0.314526 | 31       | 1.04     | 0.641721 |          |
| 246343_at   | At1g56720  | putative protein                          | expressed protein                            | 415 | 575 | 566 | 540 | 618 | 496 | 519 | 551 | 0.94 | 0.630724 | 580 | 526 | 567 | 717 | 593 | 621 | 613 | 618 | 558 | 632  | 0.88     | 0.054081 | 643      | 0.87     | 0.103878 |          |
| 246344_at   | At1g56730  | putative protein predicted proteins -     | Ara expressed protein                        | 440 | 455 | 53  | 53  | 61  | 49  | 46  | 55  | 0.84 | 0.173638 | 52  | 52  | 44  | 59  | 52  | 45  | 45  | 45  | 50  | 49   | 1.01     | 0.886924 | 52       | 0.96     | 0.674801 |          |
| 246345_at   | At1g56760  | calcium-dependent protein kinase-like     | calcium-dependent protein kinase, outat      | 222 | 298 | 329 | 339 | 293 | 269 | 329 | 320 | 0.81 | 0.074932 | 262 | 241 | 316 | 316 | 316 | 306 | 267 | 307 | 287 | 307  | 0.87     | 0.212441 | 304      | 0.88     | 0.396957 |          |
| 246346_at   | At1g56810  | hypothetical protein                      | expressed protein                            | 65  | 98  | 71  | 95  | 138 | 94  | 78  | 109 | 0.71 | 0.153636 | 54  | 54  | 52  | 68  | 74  | 78  | 73  | 62  | 53  | 75   | 0.71     | 0.009264 |          |          |          |          |

|             |          |                                              |                                               |      |      |      |      |      |      |      |      |          |          |      |      |     |      |      |      |      |      |      |      |          |          |          |          |          |          |
|-------------|----------|----------------------------------------------|-----------------------------------------------|------|------|------|------|------|------|------|------|----------|----------|------|------|-----|------|------|------|------|------|------|------|----------|----------|----------|----------|----------|----------|
| 246272_at   | A4g37150 | hydroxynitrile lyase like protein            | esterase, putative                            | 30   | 29   | 40   | 36   | 37   | 43   | 33   | 39   | 0.85     | 0.244794 | 24   | 30   | 34  | 27   | 27   | 26   | 29   | 25   | 29   | 27   | 1.10     | 0.303786 | 27       | 1.10     | 0.414142 |          |
| 246273_at   | A4g36700 | globulin-like protein                        | cupin family protein                          | 17   | 23   | 33   | 46   | 29   | 31   | 24   | 35   | 0.69     | 0.200727 | 19   | 18   | 27  | 24   | 19   | 22   | 22   | 21   | 21   | 22   | 0.98     | 0.851347 | 22       | 0.98     | 0.879491 |          |
| 246274_at   | A4g36820 | transcription factor like protein            | zinc finger (GATA type) family protein        | 40   | 49   | 53   | 78   | 74   | 62   | 47   | 71   | 0.66     | 0.018256 | 48   | 50   | 47  | 69   | 59   | 50   | 53   | 48   | 48   | 56   | 0.86     | 0.185111 | 49       | 0.81     | 0.115882 |          |
| 246275_at   | A4g36540 | putative protein : supported by full-length  | basic helix-coil-helix (bHLH) family prot     | 49   | 137  | 69   | 131  | 93   | 54   | 85   | 76   | 1.11     | 0.740477 | 73   | 63   | 69  | 67   | 69   | 74   | 68   | 74   | 69   | 75   | 0.92     | 0.238318 | 75       | 0.94     | 0.303087 |          |
| 246276_at   | A4g37270 | Cu2+-transporting ATPase-like protein        | cadmium/zinc-transcriptoin ATPase, outi       | 203  | 322  | 315  | 350  | 393  | 318  | 280  | 353  | 0.79     | 0.172673 | 246  | 252  | 278 | 407  | 298  | 262  | 338  | 320  | 259  | 325  | 0.79     | 0.087662 | 322      | 0.80     | 0.223115 |          |
| 246277_at   | A4g36460 | hypothetical protein                         | hypothetical protein                          | 22   | 21   | 34   | 25   | 27   | 27   | 26   | 26   | 0.98     | 0.881468 | 22   | 20   | 25  | 22   | 17   | 20   | 21   | 27   | 22   | 21   | 1.04     | 0.724861 | 20       | 1.13     | 0.266219 |          |
| 246278_at   | A4g37190 | tubulin-like protein                         | expressed protein                             | 82   | 119  | 106  | 115  | 128  | 108  | 103  | 117  | 0.87     | 0.233779 | 94   | 74   | 94  | 103  | 99   | 82   | 102  | 87   | 85   | 97   | 0.88     | 0.099209 | 98       | 0.86     | 0.119355 |          |
| 246279_at   | A4g36740 | hemoglobin protein                           | hemoglobin-leucine zipper family protein      | 129  | 127  | 121  | 127  | 129  | 118  | 212  | 21   | 10.01    | 0.164479 | 284  | 519  | 436 | 194  | 194  | 194  | 194  | 194  | 194  | 194  | 1.30     | 0.444531 | 194      | 1.16     | 0.604560 |          |
| 246280_at   | A4g36660 | hypothetical protein                         | expressed protein                             | 284  | 361  | 402  | 528  | 559  | 463  | 349  | 517  | 0.68     | 0.020118 | 445  | 540  | 503 | 797  | 612  | 589  | 524  | 471  | 496  | 599  | 0.83     | 0.230516 | 666      | 0.74     | 0.076420 |          |
| 246281_at   | A4g36940 | hypothetical protein                         | nicotinate o-hydroxybenzoyltransferase far    | 198  | 257  | 272  | 308  | 326  | 298  | 242  | 310  | 0.78     | 0.047951 | 211  | 218  | 271 | 344  | 276  | 242  | 294  | 305  | 233  | 292  | 0.80     | 0.065984 | 287      | 0.81     | 0.201932 |          |
| 246282_at   | A4g36580 | ATPase-like protein                          | AAA-type ATPase family protein                | 65   | 80   | 90   | 99   | 97   | 93   | 78   | 96   | 0.81     | 0.071434 | 51   | 46   | 66  | 74   | 70   | 57   | 70   | 64   | 55   | 67   | 0.81     | 0.075139 | 67       | 0.81     | 0.185817 |          |
| 246283_at   | A4g36880 | putative protein                             | LIM domain-containing protein                 | 166  | 208  | 198  | 231  | 264  | 201  | 191  | 232  | 0.82     | 0.055999 | 198  | 174  | 191 | 243  | 209  | 176  | 220  | 204  | 184  | 210  | 0.87     | 0.132185 | 209      | 0.88     | 0.277157 |          |
| 246284_at   | A4g36780 | putative protein                             | brassinosteroid signaling positive regul      | 84   | 91   | 103  | 129  | 109  | 83   | 93   | 107  | 0.86     | 0.387255 | 108  | 122  | 100 | 131  | 104  | 101  | 106  | 115  | 110  | 111  | 0.99     | 0.894517 | 112      | 0.98     | 0.888933 |          |
| 246285_at   | A4g36980 | putative protein                             | expressed protein                             | 465  | 712  | 634  | 578  | 726  | 557  | 604  | 620  | 0.97     | 0.865081 | 458  | 419  | 439 | 559  | 461  | 407  | 657  | 628  | 439  | 543  | 0.81     | 0.156579 | 476      | 0.92     | 0.461685 |          |
| 246286_at   | A4g37200 | thiol-disulfide interchange like protein     | thioredoxin family protein                    | 134  | 191  | 187  | 245  | 216  | 185  | 171  | 215  | 0.79     | 0.152782 | 203  | 231  | 263 | 398  | 304  | 261  | 287  | 279  | 232  | 306  | 0.76     | 0.076205 | 321      | 0.72     | 0.113577 |          |
| 246227_at   | A4g36510 | hypothetical protein                         | hypothetical protein                          | 27   | 28   | 47   | 39   | 38   | 42   | 34   | 40   | 0.86     | 0.449770 | 17   | 22   | 31  | 22   | 25   | 21   | 37   | 26   | 23   | 26   | 0.90     | 0.011711 | 23       | 1.04     | 0.851285 |          |
| 246228_at   | A4g36430 | peroxidase like protein                      | peroxidase, putative                          | 30   | 27   | 45   | 47   | 56   | 58   | 34   | 54   | 0.63     | 0.035445 | 54   | 60   | 73  | 53   | 58   | 50   | 60   | 55   | 62   | 55   | 1.13     | 0.194074 | 54       | 1.16     | 0.224373 |          |
| 246229_at   | A4g37160 | pectinesterase like protein                  | multi-cooer oxidase type I family protei      | 12   | 11   | 17   | 15   | 16   | 13   | 13   | 15   | 0.91     | 0.580549 | 9    | 12   | 17  | 10   | 8    | 11   | 12   | 10   | 13   | 10   | 1.25     | 0.228820 | 9        | 1.36     | 0.221585 |          |
| 246230_at   | A4g36710 | SCARECROW-like protein                       | scarcew transcription factor family pro       | 60   | 71   | 77   | 127  | 143  | 121  | 69   | 131  | 0.53     | 0.001703 | 106  | 93   | 104 | 144  | 118  | 95   | 131  | 119  | 101  | 121  | 0.84     | 0.110327 | 118      | 0.86     | 0.283921 |          |
| 246231_at   | A4g37080 | putative protein                             | expressed protein                             | 230  | 319  | 273  | 249  | 319  | 225  | 274  | 264  | 1.04     | 0.804188 | 219  | 172  | 231 | 288  | 234  | 254  | 249  | 207  | 248  | 248  | 0.84     | 0.101545 | 245      | 0.84     | 0.253260 |          |
| 246232_at   | A4g36630 | hypothetical protein                         | expressed protein                             | 117  | 157  | 170  | 180  | 196  | 149  | 148  | 175  | 0.84     | 0.265776 | 99   | 90   | 104 | 136  | 120  | 95   | 141  | 127  | 98   | 124  | 0.79     | 0.055293 | 117      | 0.84     | 0.191236 |          |
| 246233_at   | A4g36550 | putative protein                             | U-box domain-containing protein               | 103  | 146  | 147  | 148  | 205  | 120  | 132  | 158  | 0.84     | 0.429386 | 100  | 88   | 91  | 100  | 97   | 92   | 119  | 117  | 93   | 105  | 0.89     | 0.184419 | 96       | 0.97     | 0.527121 |          |
| 246234_at   | A4g37280 | putative protein                             | MRO family protein                            | 281  | 331  | 357  | 367  | 510  | 317  | 323  | 398  | 0.81     | 0.292049 | 330  | 375  | 350 | 482  | 415  | 385  | 368  | 358  | 351  | 402  | 0.87     | 0.158938 | 428      | 0.82     | 0.073014 |          |
| 246235_at   | A4g36830 | putative protein                             | putative protein                              | 45   | 85   | 106  | 116  | 135  | 114  | 89   | 122  | 0.73     | 0.045576 | 80   | 82   | 96  | 93   | 67   | 77   | 85   | 90   | 86   | 83   | 1.04     | 0.662539 | 79       | 1.08     | 0.507596 |          |
| 246236_at   | A4g36470 | hypothetical protein                         | S-adenosyl-L-methionine:carboxyl methyl       | 30   | 49   | 41   | 36   | 36   | 33   | 40   | 35   | 1.13     | 0.455487 | 26   | 23   | 35  | 28   | 23   | 25   | 27   | 26   | 28   | 26   | 1.08     | 0.496822 | 25       | 1.10     | 0.562674 |          |
| 246237_at   | A4g36300 | putative protein                             | radical SAM domain-containing protein /       | 261  | 423  | 407  | 379  | 463  | 356  | 364  | 400  | 0.91     | 0.587549 | 283  | 287  | 291 | 308  | 321  | 270  | 397  | 350  | 287  | 329  | 0.87     | 0.188603 | 300      | 0.96     | 0.462686 |          |
| 246238_at   | A4g36670 | sugar transporter like protein               | mannitol transporter, putative                | 43   | 67   | 73   | 51   | 48   | 44   | 61   | 48   | 1.29     | 0.229986 | 51   | 63   | 52  | 43   | 31   | 33   | 43   | 33   | 55   | 37   | 1.50     | 0.005877 | 36       | 1.54     | 0.022263 |          |
| 246239_at   | A4g36790 | transporter-related                          | transporter-related                           | 89   | 133  | 150  | 121  | 126  | 109  | 124  | 119  | 1.05     | 0.788253 | 142  | 141  | 125 | 175  | 150  | 142  | 174  | 165  | 136  | 161  | 0.84     | 0.037232 | 156      | 0.87     | 0.150492 |          |
| 246240_at   | A4g37130 | nucleoporin-like protein                     | hydroxycorticosterol dihydrocortain family c  | 281  | 364  | 318  | 384  | 391  | 314  | 321  | 363  | 0.88     | 0.288339 | 309  | 236  | 290 | 430  | 315  | 297  | 398  | 379  | 278  | 364  | 0.76     | 0.068071 | 347      | 0.80     | 0.216250 |          |
| 246241_at   | A4g37020 | putative protein                             | patatin, putative                             | 190  | 211  | 368  | 440  | 420  | 244  | 334  | 349  | 0.89     | 0.474032 | 275  | 261  | 288 | 380  | 289  | 331  | 318  | 275  | 323  | 324  | 0.85     | 0.075124 | 321      | 0.85     | 0.198997 |          |
| 246242_at   | A4g36860 | putative protein                             | late embryogenesis abundant domain- $\alpha$  | 30   | 35   | 48   | 152  | 54   | 50   | 38   | 85   | 0.44     | 0.230274 | 31   | 27   | 34  | 31   | 27   | 24   | 30   | 31   | 29   | 1.05 | 0.603161 | 27       | 1.11     | 0.326935 |          |          |
| 246243_at   | A4g36250 | trichoyanin like protein                     | expressed protein /// trichoyanin-related     | 235  | 352  | 364  | 338  | 378  | 299  | 317  | 338  | 0.94     | 0.677591 | 291  | 344  | 361 | 492  | 326  | 323  | 378  | 373  | 332  | 378  | 0.88     | 0.330405 | 380      | 0.87     | 0.465508 |          |
| 246244_at   | A4g37250 | receptor kinase-like protein                 | leucine-rich repeat family protein / protei   | 477  | 474  | 542  | 391  | 448  | 326  | 498  | 388  | 1.28     | 0.055337 | 450  | 437  | 463 | 408  | 375  | 301  | 518  | 507  | 450  | 422  | 1.07     | 0.628917 | 361      | 1.24     | 0.053172 |          |
| 246245_at   | A4g36440 | putative protein                             | expressed protein                             | 283  | 349  | 419  | 384  | 453  | 334  | 349  | 397  | 0.89     | 0.474032 | 275  | 261  | 288 | 380  | 289  | 331  | 318  | 275  | 323  | 324  | 0.85     | 0.075124 | 321      | 0.85     | 0.198997 |          |
| 246246_at   | A4g37170 | putative protein                             | pentatricopeptide (PPR) repeat-containi       | 51   | 65   | 64   | 81   | 86   | 72   | 60   | 80   | 0.76     | 0.031704 | 46   | 36   | 48  | 53   | 46   | 43   | 52   | 47   | 43   | 48   | 0.90     | 0.218553 | 47       | 0.91     | 0.428506 |          |
| 246247_at   | A4g36640 | putative protein                             | SEC14 cytosolic factor family protein / o     | 47   | 60   | 69   | 85   | 67   | 81   | 59   | 78   | 0.75     | 0.085606 | 39   | 56   | 61  | 82   | 56   | 57   | 70   | 58   | 52   | 65   | 0.80     | 0.177770 | 65       | 0.80     | 0.290371 |          |
| 246248_at   | A4g36560 | hypothetical protein                         | hypothetical protein                          | 16   | 15   | 20   | 16   | 15   | 14   | 17   | 15   | 1.12     | 0.340392 | 8    | 9    | 15  | 16   | 16   | 9    | 21   | 15   | 11   | 15   | 0.70     | 0.180748 | 14       | 0.79     | 0.413471 |          |
| 246249_at   | A4g36680 | putative protein                             | pentatricopeptide (PPR) repeat-containi       | 142  | 1614 | 159  | 214  | 210  | 179  | 155  | 201  | 0.77     | 0.058126 | 138  | 152  | 157 | 234  | 203  | 162  | 173  | 140  | 168  | 174  | 0.74     | 0.045601 | 168      | 0.69     | 0.020640 |          |
| 246250_at   | A4g36880 | cysteine proteinase similar to cysteine /    | cysteine proteinase, putative                 | 70   | 101  | 97   | 172  | 196  | 188  | 89   | 185  | 0.48     | 0.001289 | 67   | 61   | 75  | 222  | 148  | 145  | 150  | 127  | 67   | 158  | 0.43     | 0.006273 | 172      | 0.39     | 0.015004 |          |
| 246251_at   | A4g37220 | cold acclimation protein homolog             | stress-responsive protein, putative           | 32   | 33   | 38   | 40   | 44   | 36   | 34   | 40   | 0.86     | 0.125866 | 31   | 36   | 35  | 31   | 29   | 28   | 35   | 26   | 34   | 30   | 1.15     | 0.109673 | 29       | 1.16     | 0.051856 |          |
| 246252_s_at | A4g37070 | catatin-like protein :supported by full-len  | patatin, putative /// patatin, putative       | 6    | 10   | 10   | 12   | 11   | 9    | 9    | 11   | 0.77     | 0.238134 | 13   | 13   | 12  | 22   | 13   | 10   | 19   | 18   | 13   | 16   | 0.79     | 0.282828 | 15       | 0.86     | 0.618234 |          |
| 246253_at   | A4g37260 | myb-related protein                          | myb family transcription factor (MYB73)       | 1506 | 1636 | 1998 | 1137 | 1552 | 757  | 1713 | 1149 | 1.49     | 0.107174 | 1560 | 1904 | 265 | 1496 | 1429 | 1279 | 1382 | 1726 | 1820 | 1590 | 1541     | 1.03     | 0.795647 | 1386     | 1.15     | 0.328871 |
| 246254_at   | A4g36450 | MAP kinase like protein                      | MAP kinase-like protein                       | 29   | 25   | 34   | 24   | 27   | 29   | 29   | 0.89 | 0.504944 | 24       | 20   | 25   | 20  | 25   | 24   | 25   | 24   | 25   | 24   | 25   | 0.92     | 0.444582 | 24       | 0.93     | 0.023274 |          |
| 246255_at   | A4g36650 | transcription initiation factor like protein | transcription factor IIB (TFIIB) family pro   | 89   | 114  | 112  | 129  | 151  | 118  | 105  | 133  | 0.79     | 0.093573 | 93   | 93   | 94  | 117  | 118  | 97   | 114  | 105  | 93   | 110  | 0.84     | 0.017545 | 111      | 0.84     | 0.059678 |          |
| 246256_at   | A4g36770 | glycosyltransferase-like protein             | UDP-glucuronosyl(WUDP-glucosyl) transfe       | 153  | 223  | 264  | 236  | 216  | 163  | 213  | 205  | 1.04     | 0.840576 | 219  | 232  | 215 | 178  | 113  | 119  | 116  | 112  | 122  | 127  | 1.74     | 0.001561 | 137      | 1.62     | 0.016061 |          |
| 246257_at   | A4g36890 | splicing factor-like protein                 | U2 snRNP auxiliary factor lae subunit.        | 884  | 1227 | 1328 | 1270 | 1461 | 1131 | 1146 | 1287 | 0.89     | 0.441367 | 835  | 806  | 955 | 1199 | 944  | 858  | 1044 | 1067 | 865  | 1023 | 0.85     | 0.101915 | 1001     | 0.86     | 0.254083 |          |
| 246223_at   | A4g36530 | UDP-glucuronosyltransferase-like protein     | UDP-glucuronosyltransferase family 43 protein | 172  | 186  | 192  | 202  | 200  | 172  | 182  | 163  | 0.84     | 0.033907 | 143  | 132  | 143 | 159  | 207  | 177  | 178  | 161  | 139  | 179  | 0.99     | 0.010949 | 188      | 0.74     | 0.009767 |          |
| 246224_at   | A4g36590 | putative MADS-box protein :supported:        | MADS-box protein (AGL40)                      | 10   | 14</ |      |      |      |      |      |      |          |          |      |      |     |      |      |      |      |      |      |      |          |          |          |          |          |          |

|           |           |                                                                                         |      |      |      |      |      |      |      |      |          |          |      |      |      |      |      |      |      |      |      |      |          |          |          |          |          |          |
|-----------|-----------|-----------------------------------------------------------------------------------------|------|------|------|------|------|------|------|------|----------|----------|------|------|------|------|------|------|------|------|------|------|----------|----------|----------|----------|----------|----------|
| 246182_at | A15g20870 | beta-1,3-glucanase - like protein proba glycosyl hydrolase family 17 protein            | 58   | 71   | 76   | 78   | 102  | 86   | 68   | 89   | 0.77     | 0.088371 | 59   | 60   | 67   | 80   | 62   | 61   | 82   | 70   | 62   | 71   | 0.88     | 0.211991 | 67       | 0.92     | 0.475842 |          |
| 246183_at | A15g20940 | beta-glucosidase - like protein beta-Gl glycosyl hydrolase family 3 protein             | 74   | 88   | 99   | 82   | 77   | 87   | 87   | 82   | 1.06     | 0.551505 | 79   | 69   | 89   | 61   | 58   | 56   | 68   | 69   | 79   | 63   | 1.26     | 0.026548 | 58       | 1.35     | 0.028408 |          |
| 246184_at | A15g20950 | beta-D-glucan exohydrolase - like prot glycosyl hydrolase family 3 protein              | 1965 | 2136 | 2404 | 2213 | 2386 | 2060 | 2169 | 2220 | 0.98     | 0.763395 | 1576 | 1480 | 1756 | 1812 | 1763 | 1446 | 1922 | 1795 | 1604 | 1748 | 0.92     | 0.282797 | 1674     | 0.96     | 0.646474 |          |
| 246185_at | A15g20960 | 5-methyltetrahydrofolate dehydrogenase - like protein                                   | 74   | 80   | 96   | 129  | 96   | 83   | 103  | 0.79 | 0.016454 | 57       | 53   | 55   | 56   | 52   | 40   | 52   | 56   | 40   | 51   | 58   | 0.96     | 0.105695 | 45       | 0.91     | 0.039897 |          |
| 246186_at | A15g21030 | PINHEAD - like protein PINHEAD. Ara PAZ domain-containing protein / dslw do             | 27   | 42   | 46   | 32   | 39   | 36   | 39   | 36   | 1.08     | 0.648154 | 31   | 35   | 36   | 25   | 24   | 26   | 32   | 26   | 34   | 27   | 1.29     | 0.013407 | 25       | 1.37     | 0.005850 |          |
| 246187_at | A15g21020 | putative protein                                                                        | 26   | 28   | 36   | 27   | 25   | 29   | 30   | 27   | 1.10     | 0.422690 | 19   | 21   | 24   | 23   | 22   | 15   | 24   | 19   | 21   | 20   | 1.04     | 0.732240 | 20       | 1.07     | 0.640901 |          |
| 246188_at | A15g21050 | putative protein                                                                        | 42   | 63   | 56   | 59   | 53   | 50   | 57   | 0.88 | 0.225512 | 37       | 43   | 44   | 44   | 32   | 35   | 38   | 41   | 41   | 38   | 1.08 | 0.395199 | 37       | 1.11     | 0.387438 |          |          |
| 246189_at | A15g20210 | ABG3-binding protein 2 - supported by cDN ARA repair protein RAD51, putative            | 2023 | 178  | 2023 | 211  | 242  | 196  | 222  | 197  | 0.89     | 0.23466  | 226  | 229  | 236  | 237  | 205  | 237  | 236  | 230  | 237  | 236  | 0.90     | 0.337336 | 283      | 0.94     | 0.29368  |          |
| 246190_at | A15g21010 | hypothetical protein (fragment) succo- specific-type POZ protein-related                | 165  | 196  | 216  | 217  | 243  | 209  | 192  | 223  | 0.86     | 0.17395  | 150  | 143  | 163  | 207  | 178  | 158  | 175  | 170  | 152  | 178  | 0.86     | 0.070530 | 181      | 0.84     | 0.130346 |          |
| 246191_at | A15g20890 | T-complex protein 1, beta subunit T-Ci chaperonin, putative                             | 1469 | 1656 | 1784 | 1856 | 1975 | 1689 | 1636 | 1840 | 0.89     | 0.174618 | 1098 | 1042 | 1402 | 1469 | 1339 | 1125 | 1193 | 1287 | 1180 | 1283 | 0.92     | 0.404420 | 1311     | 0.90     | 0.434456 |          |
| 246192_at | A15g20920 | translation initiation factor eIF-2 beta c eukaryotic translation initiation factor 2 s | 1801 | 2187 | 2284 | 2389 | 2686 | 2129 | 2091 | 2401 | 0.87     | 0.228127 | 2088 | 2157 | 2218 | 2740 | 2484 | 2262 | 2489 | 2434 | 2154 | 2482 | 0.87     | 0.021205 | 2495     | 0.86     | 0.075799 |          |
| 246193_at | A15g20880 | Expressed protein - supported by full-length expressed protein                          | 99   | 125  | 126  | 155  | 178  | 127  | 117  | 153  | 0.76     | 0.013385 | 116  | 133  | 154  | 236  | 144  | 138  | 150  | 144  | 134  | 156  | 0.86     | 0.277353 | 163      | 0.83     | 0.311248 |          |
| 246194_at | A15g20935 | Expressed protein - supported by full-length expressed protein                          | 37   | 52   | 49   | 73   | 52   | 59   | 46   | 75   | 0.62     | 0.057823 | 36   | 39   | 35   | 67   | 50   | 48   | 43   | 39   | 37   | 49   | 0.74     | 0.101345 | 55       | 0.67     | 0.043605 |          |
| 246195_at | A15g21040 | putative protein predicted proteins, Arv- c-box family protein / WD-40 repeat fam       | 265  | 312  | 334  | 381  | 427  | 322  | 304  | 377  | 0.81     | 0.117503 | 278  | 243  | 289  | 396  | 330  | 295  | 344  | 313  | 270  | 335  | 0.81     | 0.040450 | 340      | 0.80     | 0.098984 |          |
| 246196_at | A15g20900 | putative protein predicted proteins, Ara expressed protein                              | 748  | 1010 | 1055 | 1162 | 1412 | 1112 | 938  | 1229 | 0.76     | 0.094867 | 1129 | 1422 | 1245 | 1813 | 1571 | 1469 | 1593 | 1479 | 1265 | 1585 | 0.80     | 0.021512 | 1617     | 0.78     | 0.057065 |          |
| 246197_at | A15g20990 | MOLYBDOPTEIN BIOSYNTHESIS C molybdothion biosynthesis CNX1 protei                       | 215  | 297  | 299  | 277  | 334  | 254  | 270  | 288  | 0.94     | 0.650131 | 244  | 225  | 262  | 297  | 240  | 224  | 262  | 278  | 244  | 260  | 0.94     | 0.422345 | 253      | 0.96     | 0.709146 |          |
| 246198_at | A15g20850 | Rad51-like protein - supported by cDN DNA repair protein RAD51, putative                | 100  | 101  | 103  | 100  | 113  | 104  | 95   | 106  | 0.90     | 0.230100 | 83   | 84   | 96   | 105  | 101  | 89   | 90   | 86   | 88   | 94   | 0.93     | 0.330317 | 98       | 0.89     | 0.172747 |          |
| 246199_at | A15g20960 | aldehyde oxidase AAO1 - supported by aldehyde oxidase 1 (AAO1)                          | 20   | 24   | 119  | 30   | 35   | 26   | 61   | 0.42 | 0.289160 | 24       | 26   | 29   | 44   | 33   | 22   | 46   | 33   | 26   | 37   | 71   | 0.71     | 0.037765 | 36       | 0.73     | 0.075638 |          |
| 246199_at | A15g20960 | protein kinase toulad - supported by c protein kinase, putative                         | 213  | 213  | 218  | 240  | 265  | 199  | 196  | 235  | 0.83     | 0.227718 | 144  | 133  | 150  | 217  | 179  | 151  | 186  | 162  | 142  | 178  | 0.79     | 0.053002 | 182      | 0.78     | 0.108786 |          |
| 246199_at | A15g20985 | putative protein non-consensus donor - zinc finger (C3HC4-type RING finger) fa          | 289  | 362  | 354  | 543  | 550  | 443  | 335  | 512  | 0.66     | 0.013235 | 390  | 398  | 414  | 696  | 568  | 515  | 412  | 425  | 400  | 523  | 0.77     | 0.128339 | 593      | 0.68     | 0.023840 |          |
| 246199_at | A15g20870 | peptide transferase - like protein peptid protein-dependent oligopeptide transport      | 59   | 68   | 86   | 78   | 86   | 72   | 71   | 78   | 0.91     | 0.451603 | 57   | 55   | 67   | 62   | 50   | 53   | 63   | 59   | 60   | 61   | 0.97     | 0.848118 | 55       | 1.09     | 0.418695 |          |
| 246199_at | A15g20840 | putative protein predicted proteins, Ara- putative protein predicted proteins, Ara      | 30   | 42   | 40   | 44   | 43   | 40   | 37   | 42   | 0.88     | 0.283316 | 32   | 34   | 34   | 35   | 31   | 29   | 39   | 35   | 33   | 34   | 0.99     | 0.928411 | 31       | 0.77     | 0.335837 |          |
| 246199_at | A15g20840 | putative protein predicted proteins, Ara- putative protein predicted proteins, Ara      | 12   | 15   | 18   | 16   | 16   | 18   | 15   | 17   | 0.90     | 0.473457 | 11   | 8    | 15   | 17   | 9    | 10   | 16   | 12   | 12   | 13   | 0.91     | 0.644646 | 12       | 0.98     | 0.934235 |          |
| 246199_at | A15g20840 | putative protein predicted proteins, Ara- putative protein predicted proteins, Ara      | 235  | 295  | 349  | 488  | 498  | 405  | 293  | 464  | 0.63     | 0.017958 | 210  | 200  | 217  | 351  | 264  | 244  | 259  | 241  | 209  | 272  | 0.77     | 0.064030 | 286      | 0.73     | 0.080406 |          |
| 246199_at | A15g20840 | SOH1 - like protein SOH1, Saccharom SOH1 family protein                                 | 185  | 241  | 263  | 252  | 283  | 236  | 229  | 261  | 0.86     | 0.300170 | 221  | 259  | 278  | 373  | 265  | 268  | 284  | 285  | 253  | 295  | 0.76     | 0.199353 | 302      | 0.84     | 0.220285 |          |
| 246199_at | A15g20840 | TiD - like WD repeat protein TiD, Dros transducin family protein / WD-40 repeat         | 110  | 125  | 113  | 157  | 154  | 143  | 116  | 151  | 0.77     | 0.004743 | 88   | 80   | 105  | 122  | 99   | 91   | 96   | 92   | 91   | 100  | 0.91     | 0.357481 | 104      | 0.87     | 0.321970 |          |
| 246199_at | A15g20840 | putative protein                                                                        | 27   | 39   | 36   | 36   | 48   | 35   | 34   | 40   | 0.86     | 0.374862 | 33   | 30   | 36   | 31   | 30   | 35   | 50   | 34   | 33   | 36   | 0.92     | 0.558971 | 32       | 1.03     | 0.703020 |          |
| 246199_at | A15g20840 | lipocholesterol biosynthetic protein integral membrane family protein                   | 164  | 200  | 245  | 219  | 245  | 215  | 203  | 226  | 0.90     | 0.408951 | 125  | 157  | 162  | 243  | 153  | 161  | 159  | 147  | 148  | 173  | 0.86     | 0.367883 | 186      | 0.80     | 0.293606 |          |
| 246199_at | A15g20840 | dynein light chain - like protein dynein - dynein light chain, putative                 | 125  | 154  | 146  | 136  | 143  | 125  | 154  | 135  | 1.14     | 0.340105 | 131  | 164  | 157  | 276  | 205  | 214  | 282  | 254  | 150  | 246  | 0.86     | 0.81     | 0.050599 | 232      | 0.85     | 0.025602 |
| 246199_at | A15g20840 | peroxidase peroxidase, Lvcnecion c peroxidase, putative                                 | 15   | 20   | 22   | 24   | 23   | 10   | 27   | 17   | 1.00     | 0.986003 | 11   | 15   | 16   | 15   | 13   | 13   | 16   | 14   | 15   | 16   | 0.95     | 0.021983 | 14       | 1.01     | 0.914014 |          |
| 246199_at | A15g20840 | receptor-like protein kinase - like protein kinase family protein                       | 88   | 117  | 129  | 110  | 121  | 100  | 112  | 110  | 1.01     | 0.940910 | 66   | 60   | 84   | 70   | 65   | 61   | 83   | 77   | 70   | 71   | 0.98     | 0.854497 | 67       | 0.97     | 0.589400 |          |
| 246199_at | A15g20840 | 26S proteasome AAA-ATPase subunit 26S proteasome AAA-ATPase subunit (I                  | 508  | 575  | 643  | 715  | 753  | 641  | 575  | 703  | 0.82     | 0.066181 | 479  | 441  | 509  | 728  | 538  | 485  | 606  | 592  | 476  | 589  | 0.81     | 0.087861 | 583      | 0.82     | 0.231617 |          |
| 246199_at | A15g20840 | glycine-rich RNA-binding protein - like RNA recognition motif (RRM)-containing          | 128  | 160  | 172  | 161  | 201  | 148  | 151  | 170  | 0.89     | 0.437451 | 134  | 127  | 127  | 198  | 168  | 146  | 164  | 147  | 129  | 164  | 0.79     | 0.032607 | 170      | 0.76     | 0.055759 |          |
| 246199_at | A15g20840 | peroxidase ATP-N - supported by full-length peroxidase, putative                        | 15   | 20   | 17   | 17   | 18   | 12   | 10   | 17   | 1.00     | 0.986003 | 11   | 15   | 16   | 15   | 13   | 13   | 16   | 14   | 15   | 16   | 0.95     | 0.021983 | 14       | 1.01     | 0.914014 |          |
| 246199_at | A15g20840 | putative protein predicted proteins from integral membrane family protein               | 123  | 158  | 170  | 169  | 188  | 159  | 150  | 172  | 0.87     | 0.267719 | 156  | 161  | 172  | 237  | 176  | 173  | 168  | 173  | 163  | 186  | 0.88     | 0.243932 | 196      | 0.83     | 0.202986 |          |
| 246199_at | A15g20840 | putative protein predicted proteins from expressed protein                              | 73   | 121  | 121  | 91   | 108  | 96   | 105  | 98   | 1.07     | 0.716369 | 86   | 95   | 90   | 125  | 92   | 96   | 97   | 97   | 97   | 90   | 1.01     | 0.89     | 0.231063 | 104      | 0.86     | 0.258477 |
| 246199_at | A15g20840 | IPP transferase - like protein IRNA dnt RNA isopentenyltransferase 9 / IPP trar         | 169  | 213  | 241  | 233  | 251  | 213  | 208  | 232  | 0.89     | 0.359103 | 159  | 161  | 194  | 235  | 183  | 164  | 196  | 196  | 171  | 195  | 0.88     | 0.229597 | 194      | 0.88     | 0.389621 |          |
| 246199_at | A15g20840 | RAY1 small RNA-like GTP-binding nucleic acid-related GTP-binding nuclear protein        | 1951 | 2322 | 2508 | 3027 | 2738 | 2261 | 2923 | 0.77 | 0.024689 | 1757     | 1922 | 2075 | 2858 | 2117 | 1947 | 2296 | 2302 | 1918 | 2304 | 2357 | 0.78     | 0.122961 | 2307     | 0.89     | 0.050039 |          |
| 246199_at | A15g20840 | putative protein predicted proteins, Ara: plastid-lipid associated protein PAP-rela     | 263  | 499  | 467  | 366  | 486  | 322  | 410  | 391  | 1.05     | 0.845355 | 422  | 614  | 428  | 720  | 475  | 529  | 542  | 481  | 488  | 549  | 0.89     | 0.444486 | 574      | 0.85     | 0.424729 |          |
| 246199_at | A15g20840 | putative protein predicted proteins, Ara: agent domain-containing protein               | 105  | 126  | 154  | 132  | 143  | 124  | 128  | 133  | 0.96     | 0.768026 | 103  | 109  | 125  | 134  | 118  | 119  | 142  | 128  | 112  | 129  | 0.87     | 0.071820 | 124      | 0.90     | 0.223266 |          |
| 246199_at | A15g20840 | putative protein predicted proteins from expressed protein                              | 722  | 964  | 960  | 1101 | 1200 | 985  | 882  | 1095 | 0.81     | 0.102803 | 1062 | 1163 | 1170 | 1594 | 1308 | 1228 | 1256 | 1148 | 1132 | 1307 | 0.87     | 0.146178 | 1377     | 0.82     | 0.102842 |          |
| 246199_at | A15g20840 | cytochrome-b5 reductase - like protein NADH-cytochrome b5 reductase, outu               | 344  | 428  | 412  | 598  | 605  | 478  | 385  | 581  | 0.70     | 0.027026 | 537  | 493  | 584  | 787  | 606  | 595  | 510  | 502  | 525  | 600  | 0.87     | 0.316781 | 663      | 0.79     | 0.085918 |          |
| 246199_at | A15g20840 | Expressed protein - supported by full-length expressed protein                          | 149  | 169  | 168  | 182  | 149  | 169  | 168  | 182  | 0.84     | 0.195371 | 162  | 148  | 164  | 181  | 256  | 211  | 184  | 203  | 218  | 194  | 0.88     | 0.032328 | 198      | 0.75     | 0.065694 |          |
| 246199_at | A15g20840 | putative protein acyl-protein thioesterase phospholipase/carboxylesterase family c      | 591  | 771  | 685  | 818  | 969  | 711  | 682  | 833  | 0.82     | 0.173728 | 791  | 737  | 763  | 1084 | 896  | 816  | 947  | 871  | 763  | 923  | 0.83     | 0.041475 | 932      | 0.82     | 0.105180 |          |
| 246199_at | A15g20840 | Expressed protein - supported by full-length expressed protein                          | 58   | 75   | 90   | 293  | 263  | 235  | 76   | 264  | 0.29     | 0.005096 | 84   | 70   | 101  | 319  | 246  | 200  | 192  | 202  | 85   | 232  | 0.37     | 0.003874 | 255      | 0.33     | 0.008810 |          |
| 246199_at | A15g20840 | putative protein predicted proteins, Arv: MutT/nudix family protein                     | 331  | 435  | 410  | 540  | 509  | 457  | 392  | 502  | 0.78     | 0.005946 | 454  | 449  | 543  | 884  | 620  | 502  | 574  | 541  | 482  | 624  | 0.77     | 0.178020 | 688      | 0.72     | 0.186178 |          |
| 246199_at | A15g20840 | putative protein                                                                        | 28   | 40   | 37   | 42   | 37   | 42   | 37   | 42   | 0.86     | 0.115878 | 33   | 31   | 32   | 35   | 34   | 31   | 34   | 31   |      |      |          |          |          |          |          |          |

|             |           |                                                                                        |                   |      |      |      |      |      |      |      |      |          |          |      |      |      |      |      |      |      |      |      |      |          |          |      |           |          |
|-------------|-----------|----------------------------------------------------------------------------------------|-------------------|------|------|------|------|------|------|------|------|----------|----------|------|------|------|------|------|------|------|------|------|------|----------|----------|------|-----------|----------|
| 240808_at   | A15g20600 | putative protein                                                                       | expressed protein | 363  | 432  | 479  | 454  | 491  | 392  | 425  | 446  | 0.95     | 0.660348 | 314  | 303  | 383  | 430  | 367  | 327  | 390  | 373  | 334  | 377  | 0.88     | 0.178887 | 374  | 0.89      | 0.352891 |
| 240809_at   | A15g20570 | ring-box protein - like ring-box protein-i ring-box protein-related                    | 795               | 1040 | 1059 | 1209 | 1271 | 1065 | 953  | 1182 | 881  | 0.080811 | 924      | 1109 | 1060 | 1504 | 1212 | 1112 | 1174 | 1113 | 1029 | 1223 | 0.84 | 0.116252 | 1276     | 0.81 | 0.131621  |          |
| 240909_at   | A15g20520 | outlet protein BEM46 bsm1/bu5 s expressed protein                                      | 355               | 539  | 642  | 598  | 635  | 416  | 512  | 520  | 0.98 | 0.944400 | 339      | 429  | 362  | 468  | 404  | 438  | 376  | 415  | 377  | 420  | 0.90 | 0.177712 | 437      | 0.86 | 0.130459  |          |
| 240901_at   | A15g20590 | putative protein                                                                       | 153               | 191  | 183  | 184  | 211  | 155  | 150  | 184  | 0.91 | 0.267817 | 126      | 151  | 139  | 126  | 161  | 168  | 136  | 159  | 168  | 151  | 0.73 | 0.025162 | 194      | 0.72 | 0.070303  |          |
| 240902_at   | A15g20500 | oligotubedrin - supported by full-length c glutaredoxin, putative                      | 1215              | 1405 | 1374 | 1615 | 1747 | 1401 | 1331 | 1587 | 0.84 | 0.093415 | 1655     | 1652 | 1698 | 2347 | 2003 | 1763 | 1850 | 1775 | 1668 | 1948 | 0.86 | 0.120608 | 2038     | 0.82 | 0.095719  |          |
| 240903_at   | A15g20550 | ethylene-forming-enzyme-like dioxyoxygenase, 2OG-Fe(II) oxoanase 1                     | 23                | 34   | 39   | 33   | 36   | 30   | 32   | 33   | 0.98 | 0.921059 | 40       | 40   | 37   | 39   | 35   | 34   | 42   | 38   | 39   | 38   | 1.04 | 0.447118 | 38       | 1.08 | 0.179093  |          |
| 240904_at   | A15g21300 | putative protein predicted proteins, H - expressed protein                             | 217               | 246  | 237  | 302  | 303  | 249  | 233  | 285  | 0.82 | 0.059262 | 141      | 137  | 156  | 230  | 181  | 155  | 171  | 169  | 144  | 181  | 0.80 | 0.082531 | 189      | 0.77 | 0.124579  |          |
| 240905_at   | A15g19130 | hemocytin gene regulator - like repressor 120                                          | 80                | 119  | 103  | 103  | 120  | 136  | 101  | 121  | 0.83 | 0.267817 | 102      | 100  | 96   | 104  | 82   | 105  | 108  | 92   | 105  | 108  | 1.10 | 0.334253 | 162      | 0.88 | 0.047905  |          |
| 240901_at   | A15g19320 | RAN GTPase activating protein 2 - : suc RAN GTPase activating protein 2 (RanG          | 184               | 245  | 243  | 320  | 339  | 284  | 224  | 314  | 0.71 | 0.024507 | 174      | 163  | 190  | 278  | 213  | 198  | 239  | 215  | 176  | 229  | 0.77 | 0.035061 | 230      | 0.76 | 0.104816  |          |
| 240902_at   | A15g19330 | outlet protein V1AC 0821. Sacchara arramdioli-beta-catenin reseat famiv ocr            | 367               | 565  | 599  | 512  | 667  | 449  | 510  | 529  | 0.96 | 0.842414 | 358      | 360  | 386  | 468  | 394  | 349  | 409  | 418  | 368  | 408  | 0.90 | 0.187359 | 404      | 0.91 | 0.379423  |          |
| 240903_at   | A15g19340 | outlet protein predicted proteins, Arx expressed protein                               | 62                | 85   | 98   | 153  | 174  | 130  | 82   | 153  | 0.53 | 0.012865 | 220      | 253  | 240  | 342  | 282  | 269  | 329  | 332  | 238  | 311  | 0.76 | 0.012128 | 298      | 0.80 | 0.067621  |          |
| 240904_at   | A15g20050 | DNA binding protein ACBF - like DNA RAN-binding protein 45 (RBP45), outat              | 487               | 641  | 573  | 633  | 714  | 531  | 567  | 626  | 0.91 | 0.441824 | 589      | 548  | 589  | 833  | 651  | 601  | 736  | 709  | 575  | 706  | 0.81 | 0.025057 | 695      | 0.83 | 0.171573  |          |
| 240905_at   | A15g19360 | calcium-dependent protein kinase - like calcium-dependent protein kinase, putat        | 33                | 25   | 41   | 35   | 34   | 30   | 33   | 33   | 1.01 | 0.924089 | 19       | 21   | 25   | 26   | 17   | 19   | 23   | 22   | 22   | 21   | 1.02 | 0.855836 | 21       | 1.06 | 0.127871  |          |
| 240906_at   | A15g19400 | putative protein predicted proteins, Ho expressed protein                              | 231               | 325  | 314  | 333  | 384  | 283  | 300  | 333  | 0.90 | 0.397450 | 283      | 249  | 305  | 376  | 264  | 294  | 387  | 377  | 279  | 340  | 0.82 | 0.141649 | 311      | 0.90 | 0.436227  |          |
| 240907_at   | A15g19410 | membrane transporter - like protein wh ABC transporter family protein                  | 30                | 329  | 414  | 38   | 38   | 34   | 33   | 37   | 0.90 | 0.427440 | 28       | 29   | 38   | 33   | 35   | 34   | 38   | 33   | 32   | 35   | 0.91 | 0.304813 | 34       | 0.93 | 0.516349  |          |
| 240907_at   | A15g19420 | outlet protein predicted chromosom zinc finger protein, outative / regulator of        | 121               | 109  | 108  | 109  | 122  | 93   | 100  | 108  | 0.93 | 0.556856 | 94       | 78   | 100  | 121  | 98   | 88   | 114  | 99   | 91   | 104  | 0.88 | 0.213511 | 102      | 0.89 | 0.404475  |          |
| 240908_at   | A15g19470 | outative protein thiamin orothochosok MutT/mutdx family protein // MutT/mutdx          | 84                | 169  | 105  | 111  | 121  | 94   | 84   | 109  | 0.77 | 0.180050 | 51       | 52   | 67   | 78   | 67   | 62   | 64   | 60   | 57   | 66   | 0.86 | 0.153710 | 69       | 0.82 | 0.161656  |          |
| 240903_at   | A15g19480 | outative protein serine-aromine-rich so expressed protein                              | 184               | 169  | 171  | 198  | 219  | 178  | 154  | 198  | 0.77 | 0.091381 | 150      | 187  | 170  | 263  | 186  | 185  | 180  | 177  | 169  | 198  | 0.85 | 0.255560 | 211      | 0.80 | 0.206198  |          |
| 240904_at   | A15g19370 | peptidyl-prolyl cis-trans isomerase - like rhodanese-like domain-containing prot       | 321               | 385  | 372  | 441  | 487  | 392  | 359  | 440  | 0.82 | 0.074487 | 417      | 466  | 446  | 676  | 517  | 471  | 586  | 523  | 443  | 555  | 0.80 | 0.060448 | 555      | 0.80 | 0.154437  |          |
| 240904_at   | A15g19290 | phospholipase - like protein various per esterase/lipase/thioesterase family prote     | 1305              | 1509 | 1442 | 1691 | 1754 | 1412 | 1419 | 1619 | 0.88 | 0.172990 | 1152     | 1259 | 1222 | 1896 | 1345 | 1226 | 1195 | 1161 | 1211 | 1365 | 0.89 | 0.433567 | 1489     | 0.81 | 0.253545  |          |
| 240902_at   | A15g19440 | hydrolase                                                                              | 569               | 654  | 689  | 1023 | 1028 | 875  | 637  | 975  | 0.65 | 0.005329 | 1012     | 1056 | 1094 | 1547 | 1271 | 1132 | 1130 | 1120 | 1054 | 1240 | 0.85 | 0.143640 | 1317     | 0.80 | 0.102574  |          |
| 240903_at   | A15g19380 | putative protein predicted proteins, Arat expressed protein                            | 104               | 121  | 118  | 132  | 153  | 125  | 114  | 137  | 0.83 | 0.081515 | 84       | 80   | 97   | 111  | 100  | 87   | 108  | 97   | 87   | 101  | 0.86 | 0.093420 | 99       | 0.88 | 0.231318  |          |
| 240904_at   | A15g19450 | calcium-deendent protein kinase : au calcium-deendent protein kinase 19 (C             | 404               | 551  | 568  | 504  | 574  | 421  | 508  | 499  | 1.02 | 0.905919 | 351      | 319  | 362  | 429  | 339  | 327  | 399  | 379  | 359  | 344  | 367  | 0.94     | 0.403317 | 366  | 0.94      | 0.564665 |
| 240904_at   | A15g19430 | outative protein predicted proteins, Drc zinc finger (C3HC4-type RING finger) fa       | 200               | 348  | 360  | 353  | 418  | 287  | 302  | 353  | 0.86 | 0.475370 | 310      | 318  | 322  | 450  | 383  | 369  | 402  | 356  | 318  | 392  | 0.81 | 0.013670 | 401      | 0.79 | 0.028660  |          |
| 240904_at   | A15g20880 | putative protein predicted proteins, Arx hypothetical protein                          | 28                | 29   | 28   | 27   | 32   | 31   | 28   | 30   | 0.92 | 0.249742 | 24       | 27   | 31   | 25   | 21   | 19   | 24   | 24   | 27   | 23   | 1.18 | 0.097791 | 22       | 1.24 | 0.127860  |          |
| 240907_at   | A15g20870 | putative protein predicted proteins, Arx pseudogene, hypothetical protein              | 14                | 19   | 23   | 25   | 24   | 22   | 19   | 24   | 0.80 | 0.140435 | 16       | 17   | 21   | 15   | 17   | 19   | 18   | 20   | 18   | 18   | 1.02 | 0.810580 | 17       | 1.07 | 0.589894  |          |
| 240904_at   | A15g28880 | putative protein                                                                       | 32                | 30   | 46   | 43   | 38   | 35   | 36   | 39   | 0.93 | 0.658404 | 16       | 16   | 27   | 25   | 20   | 26   | 24   | 20   | 23   | 23   | 0.85 | 0.339345 | 22       | 0.91 | 0.646328  |          |
| 240904_at   | A15g28890 | outative protein predicted proteins, Arx hypothetical protein                          | 17                | 19   | 24   | 26   | 28   | 28   | 20   | 27   | 0.73 | 0.026880 | 18       | 18   | 18   | 19   | 16   | 18   | 18   | 17   | 18   | 18   | 1.02 | 0.644727 | 18       | 1.02 | 0.683595  |          |
| 240905_s_at | A15g28900 | protein chosphatase 2A regulatory subunit calcium-binding EF hand family protein       | 489               | 610  | 606  | 705  | 749  | 610  | 569  | 688  | 0.83 | 0.124833 | 475      | 448  | 502  | 651  | 555  | 451  | 544  | 561  | 500  | 475  | 544  | 0.87     | 0.188443 | 552  | 0.86      | 0.264516 |
| 240905_at   | A15g28910 | putative protein predicted proteins, Arx hypothetical protein                          | 1013              | 1455 | 1342 | 1961 | 1702 | 1433 | 1239 | 1501 | 0.82 | 0.130102 | 1182     | 1271 | 1265 | 1746 | 1581 | 1288 | 1399 | 1349 | 1163 | 1461 | 0.81 | 0.046919 | 1520     | 0.78 | 0.060656  |          |
| 240902_at   | A15g08310 | putative protein predicted proteins, Arx pentatricopeptide (PPR) repeat-containi       | 58                | 66   | 67   | 85   | 92   | 74   | 63   | 83   | 0.76 | 0.027910 | 53       | 45   | 58   | 69   | 55   | 58   | 59   | 55   | 52   | 59   | 0.98 | 0.88     | 0.152744 | 61   | 0.86      | 0.196348 |
| 240903_at   | A15g08340 | putative protein farnesyl cysteine carb riboflavin biosynthesis protein-related        | 119               | 176  | 196  | 169  | 196  | 144  | 163  | 169  | 0.96 | 0.839498 | 122      | 132  | 118  | 171  | 136  | 130  | 149  | 149  | 124  | 147  | 0.84 | 0.058099 | 145      | 0.85 | 0.183273  |          |
| 240904_at   | A15g08360 | putative protein predicted proteins, Arx expressed protein                             | 32                | 42   | 51   | 45   | 43   | 45   | 42   | 44   | 0.94 | 0.629641 | 31       | 39   | 44   | 39   | 31   | 33   | 37   | 35   | 38   | 35   | 1.09 | 0.403407 | 34       | 1.11 | 0.450389  |          |
| 240905_at   | A15g08380 | alpha-calactoidase - like protein alcoh alpha-calactoidase, putative / melibias        | 162               | 277  | 211  | 189  | 227  | 148  | 217  | 186  | 1.17 | 0.480248 | 338      | 369  | 340  | 235  | 204  | 193  | 246  | 271  | 348  | 231  | 1.51 | 0.001485 | 211      | 1.65 | 0.001165  |          |
| 240906_at   | A15g08390 | katafin o80 subunit - like protein katan transducin family protein / WD-40 reeat       | 250               | 346  | 329  | 374  | 378  | 308  | 338  | 353  | 0.87 | 0.295194 | 230      | 196  | 261  | 316  | 260  | 219  | 290  | 257  | 229  | 268  | 0.85 | 0.178068 | 265      | 0.86 | 0.348216  |          |
| 240907_at   | A15g08400 | outative protein predicted proteins, Arx expressed protein                             | 115               | 139  | 155  | 181  | 212  | 156  | 137  | 183  | 0.75 | 0.081949 | 135      | 139  | 151  | 167  | 135  | 145  | 149  | 141  | 142  | 147  | 0.96 | 0.522755 | 149      | 0.95 | 0.544060  |          |
| 240908_at   | A15g08430 | putative protein predicted proteins, Arx SWIB complex BAF60b domain-containi           | 240               | 371  | 365  | 304  | 446  | 337  | 325  | 392  | 0.83 | 0.276344 | 240      | 242  | 282  | 307  | 259  | 237  | 323  | 312  | 255  | 313  | 0.81 | 0.089907 | 309      | 0.82 | 0.208940  |          |
| 240909_at   | A15g08450 | putative protein predicted proteins, Arx expressed protein                             | 519               | 673  | 681  | 715  | 642  | 644  | 602  | 546  | 0.86 | 0.165484 | 602      | 546  | 625  | 779  | 650  | 552  | 623  | 591  | 650  | 654  | 0.81 | 0.055288 | 658      | 0.80 | 0.401313  |          |
| 240906_at   | A15g08420 | rev interacting protein mis3 - like rev in expressed protein                           | 435               | 468  | 455  | 518  | 551  | 458  | 453  | 509  | 0.89 | 0.123054 | 523      | 502  | 566  | 625  | 599  | 530  | 607  | 591  | 531  | 591  | 0.90 | 0.507922 | 585      | 0.91 | 0.188442  |          |
| 240903_at   | A15g08280 | hydroxymethylbilane synthase - support hydroxymethylbilane synthase / orothoc          | 213               | 325  | 266  | 343  | 369  | 289  | 268  | 334  | 0.80 | 0.175095 | 364      | 383  | 386  | 492  | 419  | 394  | 392  | 381  | 378  | 416  | 0.91 | 0.215138 | 435      | 0.87 | 0.131469  |          |
| 240904_at   | A15g08350 | outative protein FH protein interactio GRAM domain-containing protein / ABA            | 128               | 210  | 206  | 205  | 238  | 153  | 181  | 199  | 0.91 | 0.658739 | 231      | 257  | 238  | 411  | 364  | 261  | 247  | 243  | 242  | 305  | 0.79 | 0.224534 | 345      | 0.70 | 0.084354  |          |
| 240905_at   | A15g08300 | putative protein predicted proteins, Arx succinyl-CoA lyase (IGDP-formin) aloh         | 717               | 814  | 859  | 1080 | 1143 | 1019 | 796  | 1074 | 0.74 | 0.007420 | 891      | 881  | 993  | 1396 | 1027 | 889  | 941  | 848  | 925  | 1060 | 0.87 | 0.221171 | 1137     | 0.81 | 0.190000  |          |
| 240906_at   | A15g08370 | alpha-calactoidase - like protein alcoh alpha-calactoidase, putative / friger          | 180               | 201  | 203  | 190  | 110  | 86   | 97   | 68   | 93   | 0.80     | 0.116    | 82   | 90   | 116  | 82   | 89   | 113  | 128  | 90   | 101  | 0.82 | 0.022569 | 94       | 0.87 | 0.0017654 |          |
| 240905_at   | A15g08415 | lipoinic acid synthase - like protein lipoinic icid synthase family protein            | 150               | 210  | 203  | 270  | 284  | 213  | 185  | 246  | 0.56 | 0.72     | 0.063710 | 182  | 174  | 204  | 338  | 248  | 235  | 212  | 209  | 287  | 0.47 | 0.092255 | 271      | 0.69 | 0.052418  |          |
| 240906_at   | A15g08290 | putative protein DIM1 protein. Homo si yellow-leaf-specific protein 8 (YLS8) / mi      | 2265              | 2751 | 2835 | 3096 | 3478 | 2804 | 2617 | 3126 | 0.84 | 0.125831 | 2183     | 2324 | 2540 | 3246 | 2901 | 2643 | 2716 | 2558 | 2349 | 2813 | 0.84 | 0.041635 | 2930     | 0.80 | 0.046042  |          |
| 240907_at   | A15g08410 | Expressed protein : supported by full-length ferredoxin-thioredoxin reductase, outativ | 259               | 331  | 353  | 374  | 372  | 347  | 294  | 364  | 0.81 | 0.227652 | 254      | 283  | 267  | 454  | 315  | 333  | 459  | 379  | 268  | 388  | 0.89 | 0.025197 | 367      | 0.73 | 0.090205  |          |
| 240908_at   | A15g08320 | outative protein predicted proteins, Arx expressed protein                             | 144               | 179  | 153  |      |      |      |      |      |      |          |          |      |      |      |      |      |      |      |      |      |      |          |          |      |           |          |

|             |           |                                                                                        |      |      |      |      |      |      |      |      |          |          |      |      |      |      |      |      |      |      |      |      |      |          |      |      |          |
|-------------|-----------|----------------------------------------------------------------------------------------|------|------|------|------|------|------|------|------|----------|----------|------|------|------|------|------|------|------|------|------|------|------|----------|------|------|----------|
| 246000_at   | A15g20820 | putative protein predicted proteins. Arr auxin-responsive protein-related              | 41   | 53   | 73   | 64   | 74   | 66   | 56   | 68   | 0.82     | 0.273751 | 45   | 43   | 47   | 41   | 31   | 34   | 78   | 71   | 45   | 51   | 0.88 | 0.664143 | 36   | 127  | 0.044378 |
| 246001_at   | A15g20790 | putative protein predicted proteins. Arrat expressed protein                           | 22   | 17   | 31   | 32   | 29   | 34   | 23   | 32   | 0.73     | 0.111499 | 14   | 16   | 19   | 21   | 14   | 14   | 16   | 16   | 16   | 16   | 1.03 | 0.819672 | 16   | 102  | 0.907498 |
| 246002_at   | A15g20740 | riemannin-related protein - like oric2B invertase/olefin methyltransferase inhibitor   | 272  | 303  | 285  | 398  | 442  | 443  | 286  | 428  | 0.87     | 0.001207 | 421  | 489  | 446  | 772  | 605  | 580  | 705  | 685  | 462  | 670  | 0.68 | 0.004162 | 653  | 699  | 0.033999 |
| 246003_at   | A15g20720 | chitosan-binding protein - supported by cDNA; invertase-like chitosanase (ICPN21)      | 1257 | 1621 | 1451 | 1671 | 1671 | 1448 | 1583 | 0.91 | 0.234666 | 1485     | 1759 | 1690 | 2254 | 1632 | 1454 | 1847 | 1778 | 1645 | 1778 | 1645 | 0.92 | 0.460315 | 1780 | 0.92 | 0.158025 |
| 246004_at   | A15g20630 | sermin-like protein - supported by cDN; germin-like protein (GER3)                     | 37   | 265  | 42   | 62   | 67   | 47   | 115  | 59   | 1.96     | 0.495372 | 32   | 35   | 31   | 52   | 40   | 53   | 35   | 37   | 33   | 43   | 0.75 | 0.086694 | 49   | 0.67 | 0.020321 |
| 245970_at   | A15g20710 | beta-galactosidase - supported by cDN beta-galactosidase, putative / lactase, p        | 25   | 65   | 31   | 31   | 36   | 37   | 41   | 35   | 1.18     | 0.644410 | 20   | 23   | 19   | 25   | 21   | 19   | 23   | 24   | 21   | 22   | 0.92 | 0.349354 | 22   | 0.96 | 0.685519 |
| 245971_at   | A15g20730 | putative protein - supported by cDNA; arxin-responsive factor (ARF7)                   | 208  | 261  | 285  | 328  | 394  | 259  | 252  | 327  | 0.77     | 0.171493 | 206  | 157  | 198  | 245  | 219  | 176  | 243  | 248  | 187  | 226  | 0.83 | 0.112646 | 214  | 0.88 | 0.351390 |
| 245972_at   | A15g20680 | putative protein predicted proteins. Arr expressed protein                             | 114  | 130  | 160  | 164  | 174  | 114  | 130  | 160  | 0.81     | 0.001754 | 78   | 98   | 141  | 114  | 100  | 132  | 117  | 101  | 114  | 100  | 0.92 | 0.038901 | 119  | 0.93 | 0.460728 |
| 245942_at   | A15g19400 | putative protein transcriptional regulator. Repressor protein-related                  | 42   | 50   | 53   | 57   | 66   | 45   | 49   | 56   | 0.87     | 0.350946 | 48   | 56   | 55   | 79   | 62   | 53   | 69   | 56   | 53   | 64   | 0.83 | 0.148606 | 65   | 0.82 | 0.223598 |
| 245943_at   | A15g19500 | putative protein permease family. Trovator/hydroxine permease family orc               | 98   | 140  | 133  | 155  | 133  | 132  | 124  | 140  | 0.88     | 0.340857 | 127  | 137  | 143  | 246  | 154  | 144  | 173  | 179  | 135  | 179  | 0.75 | 0.116075 | 181  | 0.75 | 0.232047 |
| 245944_at   | A15g19520 | putative protein various predicted prots mechanoinsensitive ion channel domain-c       | 38   | 38   | 44   | 45   | 39   | 44   | 39   | 43   | 0.91     | 0.346815 | 37   | 33   | 40   | 40   | 40   | 36   | 51   | 38   | 37   | 41   | 0.89 | 0.278622 | 39   | 0.95 | 0.466277 |
| 245945_at   | A15g19560 | putative protein various predicted prots. Arr expressed protein                        | 19   | 22   | 20   | 23   | 19   | 23   | 20   | 21   | 0.97     | 0.69491  | 24   | 22   | 20   | 21   | 20   | 18   | 21   | 19   | 23   | 29   | 1.44 | 0.089640 | 20   | 1.47 | 0.191452 |
| 245946_at   | A15g19580 | putative protein glycol oxidase precur glycol oxidase-related                          | 698  | 622  | 623  | 385  | 483  | 429  | 648  | 432  | 1.50     | 0.004724 | 244  | 186  | 265  | 370  | 312  | 259  | 287  | 266  | 233  | 299  | 0.78 | 0.108185 | 317  | 0.73 | 0.116558 |
| 245947_at   | A15g19530 | spermine synthase (ACLS5) - supported - spermine/spermidine synthase family pn         | 305  | 420  | 329  | 454  | 419  | 368  | 351  | 414  | 0.85     | 0.220809 | 440  | 378  | 439  | 738  | 613  | 557  | 548  | 532  | 419  | 597  | 0.70 | 0.014301 | 336  | 0.66 | 0.019352 |
| 245948_at   | A15g19540 | putative protein - supported by full-lenq expressed protein                            | 108  | 238  | 263  | 265  | 296  | 240  | 223  | 267  | 0.84     | 0.252155 | 219  | 214  | 240  | 293  | 255  | 230  | 255  | 224  | 258  | 308  | 0.87 | 0.065012 | 259  | 0.86 | 0.105950 |
| 245949_at   | A15g19510 | elongation factor 15 alpha-subunit -suu elongation factor 15 alpha-subunit 2 (tE       | 2444 | 2784 | 3021 | 2827 | 3124 | 2632 | 2749 | 2861 | 0.96     | 0.638994 | 2592 | 2959 | 2744 | 3543 | 2842 | 2726 | 3006 | 3070 | 2765 | 3038 | 0.91 | 0.227212 | 3037 | 0.91 | 0.381170 |
| 245950_at   | A15g19610 | GNAQ-like protein pattern-formation (t sec) domain-containing protein                  | 15   | 18   | 21   | 17   | 18   | 21   | 18   | 18   | 0.97     | 0.774080 | 18   | 25   | 25   | 24   | 22   | 18   | 19   | 20   | 23   | 21   | 1.08 | 0.465302 | 22   | 1.05 | 0.746012 |
| 245951_at   | A15g19640 | peptide transport protein-like peptide tr- protein-dependent oligopeptide transport    | 9    | 5    | 6    | 6    | 8    | 6    | 9    | 8    | 1.24     | 0.575559 | 6    | 5    | 6    | 5    | 6    | 5    | 5    | 5    | 5    | 6    | 0.89 | 0.605173 | 7    | 0.78 | 0.330956 |
| 245960_at   | A15g19660 | subtilisin-like protein subtilisin/kexin is -like subtilase family protein             | 186  | 245  | 255  | 245  | 256  | 220  | 229  | 240  | 0.95     | 0.686065 | 170  | 152  | 180  | 222  | 182  | 147  | 214  | 206  | 167  | 194  | 0.86 | 0.209184 | 184  | 0.91 | 0.521184 |
| 245961_at   | A15g19670 | putative protein predicted proteins - Arr exolysin family protein                      | 112  | 146  | 164  | 157  | 170  | 144  | 141  | 157  | 0.90     | 0.385696 | 103  | 97   | 125  | 136  | 116  | 105  | 127  | 137  | 108  | 124  | 0.87 | 0.196909 | 119  | 0.91 | 0.433786 |
| 245962_at   | A15g19700 | putative protein predicted proteins - Arr MATE efflux protein-related                  | 67   | 75   | 76   | 83   | 101  | 69   | 72   | 84   | 0.86     | 0.291683 | 46   | 46   | 56   | 51   | 44   | 49   | 55   | 49   | 50   | 50   | 0.99 | 0.874746 | 48   | 1.02 | 0.774461 |
| 245963_at   | A15g19710 | putative protein predicted proteins - Arr hydroxylase family protein                   | 12   | 11   | 10   | 12   | 10   | 12   | 10   | 12   | 1.02     | 0.107595 | 7    | 11   | 12   | 10   | 12   | 10   | 10   | 8    | 11   | 12   | 0.87 | 0.307886 | 10   | 0.91 | 0.606549 |
| 245964_at   | A15g19720 | putative protein C-terminus of glutamine-RNA synthetase class I (E and Q) fami         | 67   | 74   | 85   | 97   | 83   | 77   | 89   | 87   | 0.87     | 0.215221 | 57   | 60   | 70   | 64   | 64   | 49   | 64   | 67   | 62   | 62   | 1.01 | 0.912402 | 59   | 1.05 | 0.651563 |
| 245965_at   | A15g19730 | pinct methyltransferase-like protein pect methyltransferase family protein             | 547  | 643  | 635  | 973  | 1060 | 879  | 608  | 971  | 0.63     | 0.003990 | 623  | 558  | 668  | 1197 | 1035 | 949  | 776  | 743  | 617  | 940  | 0.66 | 0.030139 | 1060 | 0.58 | 0.005067 |
| 245966_at   | A15g19790 | AP2 domain containing protein RAP2.1 putinase alpha-3alpha-5 chain (TUA5)              | 64   | 28   | 36   | 31   | 33   | 33   | 30   | 32   | 0.92     | 0.453415 | 22   | 26   | 29   | 27   | 22   | 24   | 27   | 29   | 26   | 26   | 0.98 | 0.806219 | 25   | 1.04 | 0.728793 |
| 245967_at   | A15g19800 | proline-rich protein extensins - hydroxylase-rich glycocalyx protein fami              | 7    | 8    | 7    | 8    | 8    | 10   | 9    | 8    | 1.10     | 0.611206 | 6    | 9    | 10   | 8    | 6    | 8    | 7    | 9    | 6    | 7    | 1.22 | 0.290383 | 7    | 1.14 | 0.588107 |
| 245968_at   | A15g19810 | putative protein extensins - proline-rich extensin-like family protein                 | 53   | 60   | 72   | 61   | 73   | 62   | 62   | 65   | 0.95     | 0.628397 | 48   | 45   | 62   | 53   | 47   | 50   | 51   | 51   | 52   | 50   | 1.02 | 0.777013 | 50   | 1.03 | 0.799049 |
| 245969_at   | A15g19830 | putative protein nuclear gene for chlor; putinase-like RNA hydroxylase family protein  | 139  | 185  | 179  | 207  | 249  | 186  | 168  | 214  | 0.78     | 0.119434 | 148  | 135  | 173  | 214  | 188  | 178  | 165  | 153  | 152  | 180  | 0.84 | 0.135000 | 193  | 0.78 | 0.055006 |
| 245936_at   | A15g19840 | hypothetical protein - transcription factor lumoni (imC) domain                        | 41   | 67   | 51   | 64   | 71   | 54   | 53   | 63   | 0.84     | 0.328261 | 46   | 43   | 49   | 61   | 54   | 48   | 47   | 50   | 46   | 52   | 0.88 | 0.129472 | 54   | 0.84 | 0.109474 |
| 245938_at   | A15g19850 | putative protein predicted proteins - diff hydroxylase, alpha-beta fold family protein | 51   | 72   | 78   | 78   | 65   | 67   | 80   | 84   | 0.78     | 0.213063 | 58   | 54   | 73   | 65   | 71   | 62   | 72   | 65   | 71   | 62   | 0.92 | 0.407257 | 67   | 0.91 | 0.587844 |
| 245937_at   | A15g19750 | putative protein 22kDa peroxisomal m peroxisomal membrane 22 kDa family p              | 228  | 268  | 281  | 308  | 327  | 276  | 259  | 304  | 0.85     | 0.112158 | 282  | 323  | 308  | 450  | 311  | 288  | 306  | 261  | 305  | 325  | 0.94 | 0.662532 | 353  | 0.86 | 0.391062 |
| 245938_at   | A15g19680 | putative protein phosphatase-1 leucine-rich repeat family protein                      | 257  | 345  | 378  | 431  | 474  | 375  | 327  | 427  | 0.77     | 0.096347 | 331  | 369  | 358  | 553  | 423  | 390  | 379  | 358  | 353  | 421  | 0.84 | 0.198233 | 455  | 0.77 | 0.114509 |
| 245939_at   | A15g19760 | oxalulotrate/malate translocator-like o dicarboxylate/tricarboxylate carrier (DTC      | 1475 | 1866 | 1707 | 2216 | 2299 | 1740 | 1683 | 2085 | 0.81     | 0.125041 | 1839 | 1737 | 1909 | 2673 | 2308 | 1979 | 1980 | 1899 | 1829 | 2168 | 0.84 | 0.134361 | 2320 | 0.79 | 0.076013 |
| 245940_at   | A15g19630 | putative protein predicted proteins - diff protein                                     | 233  | 268  | 269  | 279  | 263  | 230  | 270  | 285  | 0.92     | 0.162771 | 169  | 186  | 200  | 303  | 219  | 223  | 218  | 208  | 233  | 218  | 0.81 | 0.117152 | 248  | 0.78 | 0.106120 |
| 245941_at   | A15g19820 | putative protein karyopherin beta 3 - H PRS; lysase HEAT-like repeat-containing        | 1081 | 1293 | 1260 | 286  | 319  | 237  | 281  | 319  | 0.91     | 0.498617 | 165  | 155  | 174  | 165  | 188  | 173  | 179  | 173  | 188  | 188  | 0.88 | 0.076832 | 193  | 0.86 | 0.225645 |
| 245941_at   | A15g19690 | oligosaccharyl transferase STT3-like p oligosaccharyl transferase STT3 subunit         | 812  | 926  | 1037 | 1132 | 1180 | 943  | 925  | 1085 | 0.85     | 0.174966 | 648  | 574  | 681  | 858  | 675  | 557  | 745  | 715  | 635  | 710  | 0.89 | 0.316481 | 697  | 0.91 | 0.540574 |
| 245912_at   | A15g19600 | putative protein sulfatase transporter AT1 sulfatase transporter, putative             | 124  | 162  | 167  | 151  | 137  | 118  | 151  | 136  | 1.11     | 0.402697 | 168  | 168  | 191  | 170  | 161  | 176  | 177  | 156  | 182  | 168  | 1.08 | 0.116542 | 169  | 1.08 | 0.208084 |
| 245913_at   | A15g19860 | predicted protein                                                                      | 406  | 586  | 657  | 631  | 762  | 525  | 554  | 640  | 0.87     | 0.446592 | 618  | 640  | 622  | 907  | 737  | 734  | 749  | 707  | 626  | 767  | 0.82 | 0.026455 | 792  | 0.79 | 0.044849 |
| 245914_at   | A15g19620 | putative protein various predicted prots. Arr expressed protein                        | 518  | 578  | 583  | 683  | 571  | 433  | 375  | 496  | 0.71     | 0.046686 | 306  | 251  | 341  | 410  | 385  | 339  | 341  | 311  | 299  | 365  | 0.82 | 0.046420 | 378  | 0.79 | 0.067649 |
| 245915_s_at | A15g19770 | tubulin alpha-5 chain-like protein tubuli tubulin alpha-3alpha-5 chain (TUA5)          | 2234 | 2269 | 2283 | 2453 | 2823 | 2230 | 2262 | 2502 | 0.90     | 0.238631 | 1855 | 1610 | 1878 | 2271 | 2074 | 1732 | 2176 | 2162 | 1781 | 2083 | 0.85 | 0.072985 | 2026 | 0.88 | 0.244262 |
| 245916_at   | A15g28720 | putative protein                                                                       | 25   | 27   | 26   | 29   | 35   | 29   | 26   | 31   | 0.84     | 0.068711 | 23   | 26   | 27   | 22   | 23   | 23   | 31   | 26   | 26   | 29   | 0.99 | 0.953323 | 23   | 1.14 | 0.054098 |
| 245917_at   | A15g28740 | putative protein HCNP. Homo sapiens, transcription-coupled DNA repair protein          | 375  | 456  | 460  | 484  | 531  | 420  | 430  | 478  | 0.90     | 0.323545 | 317  | 271  | 366  | 399  | 363  | 287  | 341  | 314  | 318  | 347  | 0.92 | 0.396079 | 350  | 0.91 | 0.502214 |
| 245918_at   | A15g28760 | putative protein predicted proteins - diff hydroxylase, alpha-beta fold family protein | 9    | 11   | 15   | 14   | 12   | 14   | 12   | 13   | 0.87     | 0.413178 | 10   | 14   | 12   | 10   | 12   | 10   | 12   | 11   | 12   | 11   | 1.04 | 0.413121 | 12   | 1.10 | 0.207059 |
| 245919_at   | A15g28780 | putative protein various predicted prots. hypothetical protein                         | 13   | 18   | 16   | 16   | 20   | 12   | 16   | 10   | 1.07     | 0.972907 | 17   | 13   | 17   | 16   | 13   | 15   | 16   | 16   | 16   | 15   | 1.02 | 0.823490 | 15   | 1.02 | 0.880730 |
| 245920_at   | A15g28790 | putative protein                                                                       | 22   | 22   | 29   | 20   | 24   | 22   | 24   | 22   | 1.11     | 0.363531 | 15   | 21   | 20   | 20   | 19   | 18   | 19   | 27   | 19   | 21   | 0.90 | 0.478237 | 19   | 0.98 | 0.842630 |
| 245921_at   | A15g28800 | putative protein predicted proteins. Arrat hypothetical protein                        | 26   | 32   | 29   | 39   | 37   | 36   | 29   | 38   | 0.77     | 0.011443 | 26   | 27   | 35   | 34   | 33   | 30   | 40   | 33   | 29   | 34   | 0.86 | 0.160725 | 32   | 0.91 | 0.379131 |
| 245922_at   | A15g28810 | putative protein pseudogenes. hypothetical protein                                     | 15   | 9    | 11   | 15   | 14   | 15   | 16   | 15   | 0.97     | 0.606986 | 5    | 6    | 7    | 6    | 5    | 6    | 10   | 9    | 10   | 9    | 0.78 | 0.260496 | 6    | 0.91 | 0.207059 |
| 245923_at   | A15g28820 | putative protein predicted proteins. Arr hypothetical protein                          | 22   | 21   | 34   | 27   | 26   | 29   | 26   | 28   | 0.94     | 0.716505 | 17   | 17   |      |      |      |      |      |      |      |      |      |          |      |      |          |

|             |            |                                                                                      |     |      |      |      |      |      |      |      |          |          |      |     |     |      |      |     |      |      |     |      |          |          |          |          |          |          |
|-------------|------------|--------------------------------------------------------------------------------------|-----|------|------|------|------|------|------|------|----------|----------|------|-----|-----|------|------|-----|------|------|-----|------|----------|----------|----------|----------|----------|----------|
| 245906_at   | A15g111070 | putative protein : supported by full-length expressed protein                        | 497 | 601  | 696  | 770  | 800  | 469  | 598  | 680  | 0.88     | 0.536428 | 214  | 218 | 193 | 291  | 228  | 282 | 255  | 208  | 255 | 0.82 | 0.056686 | 246      | 0.85     | 0.190432 |          |          |
| 245847_at   | A15g111050 | MYB DNA-binding : like protein myb-r myb family transcription factor                 | 44  | 42   | 57   | 33   | 42   | 35   | 47   | 37   | 1.29     | 0.121530 | 43   | 53  | 49  | 27   | 22   | 26  | 29   | 26   | 48  | 26   | 1.86     | 0.000195 | 25       | 1.93     | 0.002691 |          |
| 245848_at   | A15g13480  | putative protein overdicted proteins - diff WD-40 repeat family protein              | 212 | 260  | 256  | 304  | 334  | 247  | 243  | 305  | 0.80     | 0.050962 | 204  | 173 | 210 | 290  | 240  | 203 | 246  | 246  | 196 | 247  | 0.79     | 0.045477 | 247      | 0.79     | 0.136308 |          |
| 245849_at   | A15g13520  | leukodien-A4 hydroxylase-like protein A4 peptidase M1 family protein                 | 425 | 411  | 577  | 534  | 522  | 390  | 506  | 506  | 0.71     | 0.041753 | 340  | 304 | 375 | 457  | 378  | 376 | 376  | 376  | 366 | 378  | 0.87     | 0.025997 | 378      | 0.87     | 0.046300 |          |
| 245850_at   | A15g13530  | ankyrin-repeat containing protein ankyr protein kinase family protein / ankyrin re   | 28  | 33   | 43   | 49   | 52   | 42   | 35   | 48   | 0.72     | 0.060126 | 21   | 21  | 27  | 24   | 23   | 20  | 26   | 23   | 23  | 1.00 | 0.976433 | 22       | 1.04     | 0.747088 |          |          |
| 245851_at   | A15g13540  | putative protein HERC2 - Homo sapiens expressed protein                              | 150 | 195  | 248  | 240  | 306  | 191  | 198  | 246  | 0.81     | 0.338342 | 170  | 141 | 171 | 248  | 205  | 187 | 195  | 199  | 161 | 207  | 0.78     | 0.028076 | 213      | 0.75     | 0.063562 |          |
| 245852_at   | A15g13510  | ribosomal protein L10-like ribosomal p peptidase M1 family protein                   | 503 | 685  | 549  | 701  | 768  | 602  | 579  | 690  | 0.84     | 0.201097 | 1032 | 867 | 851 | 1128 | 905  | 852 | 1037 | 969  | 917 | 996  | 0.92     | 0.322914 | 991      | 0.93     | 0.493117 |          |
| 245853_at   | A15g13500  | putative protein overdicted protein Ado2                                             | 252 | 261  | 269  | 286  | 263  | 257  | 266  | 258  | 0.90     | 0.399313 | 243  | 261 | 285 | 245  | 238  | 245 | 238  | 244  | 236 | 249  | 0.92     | 0.281567 | 282      | 0.94     | 0.242611 |          |
| 245854_at   | A15g13400  | adenosine nucleotide translocator : su adenosine nucleotide translocator : su0       | 461 | 471  | 596  | 622  | 627  | 539  | 509  | 596  | 0.85     | 0.186899 | 485  | 498 | 536 | 611  | 488  | 468 | 490  | 474  | 507 | 506  | 1.00     | 0.985761 | 522      | 0.97     | 0.766389 |          |
| 245855_at   | A15g13550  | sulfate transporter : supported by cDN sulfatase transporter family protein          | 95  | 100  | 99   | 145  | 145  | 98   | 138  | 0.71 | 0.004855 | 75       | 69   | 89  | 112 | 98   | 75   | 112 | 104  | 78   | 100 | 107  | 0.77     | 0.069112 | 95       | 0.82     | 0.237960 |          |
| 245856_at   | A15g28240  | putative protein overdicted proteins. Are hypochlorite                               | 23  | 26   | 40   | 34   | 35   | 30   | 33   | 90   | 0.590990 | 24       | 21   | 38  | 22  | 24   | 19   | 28  | 26   | 28   | 24  | 1.17 | 0.364490 | 22       | 1.29     | 0.298077 |          |          |
| 245857_at   | A15g28270  | putative protein various predicted crot pseudodone. hypochlorite protein // hvo      | 18  | 25   | 24   | 20   | 22   | 22   | 22   | 21   | 1.06     | 0.641714 | 21   | 22  | 35  | 25   | 20   | 16  | 32   | 22   | 23  | 23   | 0.98     | 0.889454 | 20       | 1.11     | 0.451960 |          |
| 245858_at   | A15g28280  | CER1-like protein CER1-like, A.thalian pseudodone. sterol desaturase domain+         | 27  | 23   | 29   | 20   | 27   | 28   | 27   | 28   | 0.53     | 0.386135 | 18   | 20  | 19  | 16   | 20   | 15  | 19   | 16   | 20  | 1.00 | 0.859462 | 19       | 1.04     | 0.639102 |          |          |
| 245859_at   | A15g28290  | serine (threonine) protein kinase - like protein kinase, putative                    | 184 | 222  | 219  | 254  | 271  | 212  | 208  | 246  | 0.85     | 0.150966 | 214  | 197 | 254 | 331  | 266  | 227 | 310  | 305  | 222 | 288  | 0.77     | 0.053192 | 275      | 0.81     | 0.201446 |          |
| 245860_at   | A15g28310  | putative protein predicted proteins. Are oxidoreductase-related                      | 56  | 69   | 83   | 79   | 74   | 70   | 70   | 74   | 0.94     | 0.617192 | 66   | 78  | 70  | 94   | 70   | 77  | 90   | 90   | 71  | 84   | 0.85     | 0.100841 | 80       | 0.89     | 0.323218 |          |
| 245861_at   | A15g28300  | GT1L - like protein GT1L Arabidopsis thaliana thiolase DNA-binding protein, putative | 137 | 167  | 199  | 323  | 268  | 266  | 168  | 286  | 0.59     | 0.010077 | 325  | 385 | 429 | 518  | 413  | 372 | 511  | 545  | 380 | 472  | 0.80     | 0.114841 | 434      | 0.87     | 0.362479 |          |
| 245862_at   | A15g01010  | putative protein expressed protein                                                   | 355 | 480  | 476  | 545  | 611  | 466  | 437  | 541  | 0.81     | 0.151273 | 432  | 491 | 438 | 692  | 508  | 547 | 510  | 453  | 454 | 542  | 0.84     | 0.163982 | 583      | 0.78     | 0.094686 |          |
| 245863_s_at | A1g158050  | hypothetical protein contains similarity i helicase domain-containing protein // he  | 129 | 107  | 165  | 173  | 196  | 139  | 154  | 169  | 0.91     | 0.520424 | 98   | 84  | 101 | 138  | 104  | 89  | 128  | 118  | 94  | 116  | 0.82     | 0.126858 | 111      | 0.85     | 0.346361 |          |
| 245864_at   | A1g158070  | hypothetical protein predicted by gene expressed protein                             | 31  | 43   | 37   | 51   | 63   | 50   | 37   | 55   | 0.68     | 0.029322 | 33   | 37  | 37  | 52   | 40   | 48  | 36   | 35   | 36  | 42   | 0.84     | 0.189760 | 47       | 0.77     | 0.042268 |          |
| 245865_s_at | A1g158025  | hypothetical protein contains similarity i DNA-binding bromodomain-containing p      | 77  | 102  | 169  | 301  | 204  | 286  | 116  | 264  | 0.44     | 0.022041 | 195  | 188 | 118 | 498  | 319  | 218 | 189  | 178  | 167 | 280  | 0.60     | 0.214733 | 345      | 0.48     | 0.105145 |          |
| 245866_s_at | A1g157990  | hypothetical protein                                                                 | 29  | 30   | 34   | 41   | 43   | 38   | 31   | 40   | 0.77     | 0.013369 | 28   | 31  | 38  | 44   | 29   | 31  | 34   | 27   | 32  | 33   | 0.98     | 0.895910 | 35       | 0.93     | 0.707270 |          |
| 245867_at   | A1g158080  | ATP phosphoribosyl transferase identic ATP phosphoribosyl transferase 1 (ATP-        | 178 | 252  | 183  | 309  | 327  | 272  | 204  | 303  | 0.67     | 0.026443 | 197  | 174 | 201 | 362  | 271  | 207 | 240  | 249  | 191 | 266  | 0.72     | 0.079212 | 280      | 0.68     | 0.124404 |          |
| 245868_at   | A1g158032  | hypothetical protein                                                                 | 440 | 665  | 743  | 638  | 837  | 553  | 616  | 676  | 0.91     | 0.653900 | 564  | 521 | 563 | 660  | 555  | 675 | 678  | 549  | 644 | 644  | 0.85     | 0.025479 | 622      | 0.88     | 0.116064 |          |
| 245869_at   | A1g126330  | hypothetical protein predicted by gene hypothetical protein                          | 103 | 115  | 113  | 131  | 110  | 107  | 111  | 116  | 0.95     | 0.551016 | 80   | 55  | 91  | 76   | 80   | 58  | 83   | 68   | 75  | 73   | 1.03     | 0.832768 | 71       | 1.05     | 0.772686 |          |
| 245870_at   | A1g126300  | hypothetical protein similar to hypothei BSD domain-containing protein               | 165 | 215  | 233  | 237  | 264  | 212  | 204  | 238  | 0.86     | 0.252074 | 217  | 287 | 284 | 376  | 302  | 285 | 235  | 240  | 263 | 288  | 0.91     | 0.539210 | 321      | 0.92     | 0.161558 |          |
| 245871_at   | A1g126200  | hypothetical protein predicted by gene hypothetical protein                          | 11  | 14   | 16   | 19   | 24   | 23   | 14   | 22   | 0.63     | 0.018927 | 9    | 13  | 13  | 18   | 9    | 12  | 13   | 11   | 12  | 13   | 0.95     | 0.790819 | 13       | 0.92     | 0.737715 |          |
| 245872_at   | A1g126280  | hypothetical protein contains similarity i BSD domain-containing protein             | 146 | 182  | 208  | 221  | 255  | 188  | 179  | 221  | 0.81     | 0.184978 | 191  | 184 | 194 | 281  | 239  | 219 | 213  | 223  | 190 | 235  | 0.81     | 0.033474 | 247      | 0.77     | 0.037491 |          |
| 245873_at   | A1g126260  | bHLH transcription factor GBGF-1, out basic helix-loop-helix (bHLH) family prot      | 95  | 126  | 118  | 132  | 167  | 101  | 113  | 133  | 0.85     | 0.390778 | 101  | 90  | 101 | 156  | 140  | 129 | 134  | 118  | 97  | 135  | 0.72     | 0.040805 | 142      | 0.69     | 0.007029 |          |
| 245874_at   | A1g126250  | unknown protein                                                                      | 18  | 9    | 12   | 15   | 11   | 11   | 13   | 0.82 | 0.372852 | 8        | 9    | 10  | 10  | 13   | 7    | 9   | 10   | 10   | 13  | 7    | 9        | 1.00     | 0.808854 | 10       | 0.92     | 0.673692 |
| 245875_at   | A1g126240  | hypothetical protein overdicted by gene proline-rich extensin, putative              | 25  | 23   | 27   | 21   | 21   | 25   | 23   | 26   | 0.80     | 0.085167 | 16   | 20  | 19  | 19   | 19   | 19  | 19   | 19   | 19  | 21   | 0.96     | 0.801158 | 18       | 0.96     | 0.095842 |          |
| 245876_at   | A1g126230  | chaperonin precursor, putative similar i chaperonin, putative                        | 38  | 57   | 52   | 58   | 60   | 42   | 49   | 53   | 0.96     | 0.612868 | 52   | 45  | 50  | 57   | 52   | 48  | 63   | 57   | 49  | 55   | 0.89     | 0.163488 | 52       | 0.95     | 0.454255 |          |
| 245877_at   | A1g126220  | unknown protein                                                                      | 38  | 61   | 47   | 66   | 69   | 56   | 49   | 64   | 0.77     | 0.122619 | 67   | 75  | 78  | 112  | 94   | 79  | 77   | 70   | 73  | 86   | 0.85     | 0.252351 | 95       | 0.77     | 0.099765 |          |
| 245878_at   | A1g126190  | hypothetical protein contains similarity i phosphoribolkinase/uridine kinase fami    | 140 | 186  | 176  | 181  | 208  | 159  | 168  | 183  | 0.92     | 0.489743 | 106  | 69  | 105 | 127  | 110  | 86  | 90   | 92   | 100 | 101  | 0.99     | 0.925884 | 107      | 0.93     | 0.597912 |          |
| 245843_at   | A1g126180  | unknown protein                                                                      | 147 | 238  | 228  | 258  | 293  | 223  | 205  | 258  | 0.79     | 0.201890 | 243  | 260 | 282 | 389  | 278  | 294 | 252  | 255  | 271 | 294  | 0.92     | 0.553604 | 320      | 0.85     | 0.260719 |          |
| 245844_at   | A1g126170  | hypothetical protein predicted by gene importin beta-2 subunit family protein        | 194 | 237  | 235  | 273  | 285  | 244  | 222  | 267  | 0.83     | 0.073003 | 202  | 189 | 220 | 286  | 240  | 186 | 246  | 223  | 204 | 236  | 0.86     | 0.200217 | 237      | 0.86     | 0.327338 |          |
| 245845_at   | A1g126150  | Pto kinase interactor, putative similar i protein kinase family protein              | 244 | 359  | 346  | 378  | 460  | 294  | 316  | 378  | 0.84     | 0.362398 | 315  | 269 | 288 | 400  | 372  | 302 | 360  | 369  | 291 | 361  | 0.81     | 0.024169 | 358      | 0.81     | 0.101291 |          |
| 245846_at   | A1g126130  | P-type transportin ATPase, putative s halocidal dehalogenase-like hydrolase fa       | 76  | 107  | 123  | 116  | 131  | 99   | 102  | 115  | 0.88     | 0.471452 | 73   | 72  | 86  | 99   | 76   | 71  | 83   | 86   | 77  | 83   | 0.93     | 0.403338 | 82       | 0.94     | 0.635029 |          |
| 245815_at   | A1g126090  | hypothetical protein                                                                 | 138 | 217  | 199  | 232  | 265  | 185  | 228  | 181  | 0.81     | 0.063635 | 198  | 211 | 214 | 310  | 247  | 225 | 232  | 240  | 248 | 242  | 0.94     | 0.801602 | 249      | 0.90     | 0.110534 |          |
| 245816_at   | A1g126210  | hypothetical protein similar to hypothei expressed protein                           | 149 | 119  | 118  | 172  | 232  | 163  | 129  | 189  | 0.68     | 0.062678 | 112  | 106 | 100 | 221  | 216  | 148 | 197  | 179  | 106 | 192  | 0.55     | 0.003049 | 195      | 0.55     | 0.002449 |          |
| 245817_at   | A1g126160  | hypothetical protein similar to unknown met-dependent phosphohydrolase HD            | 146 | 201  | 230  | 213  | 254  | 193  | 192  | 220  | 0.88     | 0.420499 | 193  | 200 | 176 | 263  | 206  | 215 | 198  | 182  | 190 | 213  | 0.89     | 0.267581 | 228      | 0.83     | 0.116825 |          |
| 245818_at   | A1g126100  | cvtochrome b561, putative similar to c cytochrome b561 family protein                | 108 | 138  | 166  | 203  | 197  | 172  | 137  | 191  | 0.72     | 0.048640 | 111  | 138 | 174 | 218  | 179  | 156 | 143  | 159  | 141 | 171  | 0.83     | 0.225601 | 184      | 0.77     | 0.170258 |          |
| 245819_at   | A1g126310  | cauliflower identical to CAULIFLOWER MADS-box protein, putative                      | 29  | 30   | 30   | 30   | 31   | 29   | 30   | 30   | 0.84     | 0.012468 | 30   | 32  | 38  | 28   | 26   | 34  | 27   | 34   | 24  | 28   | 0.19     | 0.085798 | 27       | 0.22     | 0.058122 |          |
| 245820_at   | A1g126320  | alvi alcohol dehydrogenase, putative s NADP-dependent oxidoreductase, putat          | 49  | 60   | 55   | 65   | 49   | 49   | 59   | 64   | 0.79     | 0.197273 | 37   | 43  | 35  | 44   | 38   | 36  | 38   | 39   | 34  | 38   | 0.97     | 0.849245 | 37       | 1.00     | 0.905462 |          |
| 245821_at   | A1g126270  | hypothetical protein similar to putative i phosphatidylinositol 3- and 4-kinase fam  | 31  | 479  | 471  | 462  | 570  | 403  | 430  | 478  | 0.90     | 0.508612 | 315  | 276 | 327 | 375  | 336  | 279 | 337  | 315  | 306 | 328  | 0.93     | 0.388808 | 330      | 0.93     | 0.497832 |          |
| 245822_at   | A1g126110  | unknown protein : supported by cDNA: expressed protein                               | 967 | 1235 | 1347 | 1422 | 1587 | 1246 | 1183 | 1418 | 0.83     | 0.190813 | 906  | 682 | 941 | 1230 | 1037 | 878 | 1166 | 1146 | 843 | 1092 | 0.77     | 0.049575 | 1049     | 0.80     | 0.189403 |          |
| 245823_at   | A1g126100  | hypothetical protein predicted by gene hypothetical protein                          | 28  | 34   | 39   | 35   | 38   | 34   | 34   | 36   | 0.95     | 0.612712 | 18   | 24  | 26  | 23   | 20   | 25  | 21   | 23   | 22  | 23   | 1.03     | 0.780088 | 21       | 1.07     | 0.596701 |          |
| 245824_at   | A1g157943  | hypothetical protein predicted by gene purine permease-related                       | 46  | 73   | 72   | 74   | 88   | 68   | 72   | 75   | 0.75     | 0.085722 | 51   | 29  | 37  | 27   | 17   | 31  | 35   | 32   | 30  | 31   | 0.97     | 0.736043 | 29       | 1.03     | 0.843210 |          |
| 245825_at   | A1g157870  | protein kinase, putative similar to crot shaoov-related protein kinase kaocaa, ou    | 185 | 239  | 226  | 263  | 288  | 255  | 217  | 269  | 0.81     | 0.052377 | 217  | 209 | 213 | 335  | 252  | 235 | 298  |      |     |      |          |          |          |          |          |          |

|             |           |                                                                                               |      |      |      |      |      |      |      |      |       |          |      |      |      |      |      |      |      |      |      |      |          |          |      |          |          |
|-------------|-----------|-----------------------------------------------------------------------------------------------|------|------|------|------|------|------|------|------|-------|----------|------|------|------|------|------|------|------|------|------|------|----------|----------|------|----------|----------|
| 245782_at   | At1g35200 | 60S ribosomal protein (fragment), puta 60S ribosomal protein L4/L1 (RPL4B), p                 | 35   | 32   | 34   | 40   | 50   | 32   | 34   | 41   | 0.82  | 0.244501 | 31   | 11   | 18   | 27   | 17   | 19   | 17   | 20   | 20   | 20   | 1.02     | 0.952910 | 21   | 0.96     | 0.915048 |
| 245783_s_at | At1g35180 | hyothetical protein similar to putative alpha 1 f-avin-containing protein / expressed protein | 157  | 100  | 170  | 286  | 298  | 256  | 173  | 280  | 0.62  | 0.002521 | 175  | 194  | 232  | 342  | 238  | 230  | 190  | 187  | 201  | 237  | 0.85     | 0.387034 | 270  | 0.74     | 0.156454 |
| 245782_at   | At1g35150 | hyothetical protein similar to Ac-like T hyothetical protein                                  | 12   | 11   | 15   | 18   | 19   | 15   | 13   | 17   | 0.72  | 0.038602 | 11   | 11   | 9    | 14   | 12   | 11   | 13   | 12   | 10   | 12   | 0.81     | 0.028080 | 12   | 0.82     | 0.094653 |
| 245783_s_at | At1g35143 | hyothetical protein similar to putative alpha 1 f-avin-containing protein / expressed protein | 6    | 6    | 7    | 7    | 7    | 7    | 7    | 7    | 0.98  | 0.003487 | 5    | 5    | 4    | 5    | 4    | 5    | 5    | 5    | 5    | 1.00 | 0.994284 | 5        | 5    | 1.032486 |          |
| 245754_at   | At1g35183 | hyothetical protein predicted by gene expressed protein                                       | 5    | 4    | 6    | 5    | 7    | 3    | 5    | 5    | 0.96  | 0.061927 | 4    | 6    | 4    | 3    | 4    | 1    | 4    | 4    | 5    | 3    | 1.46     | 0.153343 | 3    | 1.78     | 0.125015 |
| 245755_at   | At1g35210 | hyothetical protein predicted by gene expressed protein predicted by gene                     | 11   | 29   | 32   | 16   | 24   | 18   | 17   | 19   | 0.88  | 0.579797 | 14   | 13   | 16   | 16   | 14   | 20   | 16   | 12   | 14   | 15   | 0.92     | 0.535454 | 16   | 0.87     | 0.353690 |
| 245756_at   | At1g35190 | hydroxamine 6-dioxygenase hydroxylase oxidoreductase, ZOG-Fer11 oxygenase I                   | 24   | 17   | 23   | 45   | 45   | 32   | 28   | 41   | 0.89  | 0.060070 | 24   | 27   | 25   | 47   | 53   | 38   | 29   | 33   | 25   | 40   | 0.63     | 0.041773 | 46   | 0.55     | 0.009729 |
| 245757_s_at | At1g35190 | chitin-induced alpha-1 protein, putative phosphatase                                          | 159  | 124  | 154  | 124  | 127  | 167  | 135  | 124  | 0.53  | 0.041844 | 246  | 446  | 231  | 306  | 286  | 230  | 313  | 329  | 346  | 266  | 1.13     | 0.250144 | 233  | 0.69     | 0.190588 |
| 245758_at   | At1g32240 | unknown protein contains similarity to b myb family transcription factor (KAN2)               | 52   | 74   | 57   | 98   | 109  | 83   | 61   | 97   | 0.63  | 0.024719 | 43   | 39   | 50   | 89   | 65   | 62   | 59   | 57   | 44   | 66   | 0.66     | 0.031840 | 72   | 0.81     | 0.038093 |
| 245759_at   | At1g68900 | hyothetical protein predicted by gene expressed protein                                       | 125  | 210  | 212  | 246  | 281  | 206  | 182  | 244  | 0.75  | 0.158905 | 169  | 195  | 204  | 299  | 253  | 226  | 235  | 211  | 189  | 245  | 0.77     | 0.043124 | 259  | 0.73     | 0.042534 |
| 245760_s_at | At1g68920 | receptor serine/threonine kinase PRSK protein kinase, putative                                | 15   | 20   | 27   | 26   | 30   | 25   | 21   | 27   | 0.77  | 0.167432 | 14   | 14   | 22   | 15   | 16   | 15   | 28   | 17   | 17   | 18   | 0.92     | 0.699949 | 15   | 1.08     | 0.670076 |
| 245761_at   | At1g68880 | hyothetical protein predicted by gene expressed protein                                       | 175  | 324  | 273  | 301  | 350  | 257  | 257  | 303  | 0.85  | 0.425023 | 220  | 277  | 225  | 389  | 284  | 254  | 296  | 279  | 241  | 308  | 0.78     | 0.067271 | 322  | 0.75     | 0.096659 |
| 245762_at   | At1g27880 | ATP-dependent DNA helicase RecD, ATP-dependent DNA helicase, putative                         | 95   | 108  | 97   | 131  | 123  | 110  | 100  | 121  | 0.83  | 0.016821 | 81   | 64   | 94   | 87   | 87   | 71   | 76   | 72   | 80   | 1.09 | 0.910155 | 85       | 0.94 | 0.658536 |          |
| 245763_at   | At1g27850 | transposon protein, putative similar to expressed protein                                     | 144  | 199  | 210  | 223  | 255  | 200  | 184  | 226  | 0.82  | 0.180444 | 99   | 99   | 118  | 144  | 136  | 113  | 142  | 132  | 105  | 133  | 0.79     | 0.019800 | 131  | 0.80     | 0.088506 |
| 245764_s_at | At1g27840 | hyothetical protein contains similarity to transducin family protein / WD-40 repeat           | 112  | 165  | 156  | 228  | 250  | 176  | 144  | 218  | 0.66  | 0.054588 | 155  | 162  | 157  | 248  | 197  | 185  | 172  | 162  | 158  | 193  | 0.82     | 0.134599 | 210  | 0.75     | 0.056472 |
| 245765_at   | At1g33600 | hyothetical protein similar to putative epsilon leucine-rich repeat family protein            | 42   | 39   | 46   | 35   | 50   | 38   | 42   | 41   | 1.03  | 0.842135 | 24   | 24   | 22   | 26   | 24   | 29   | 25   | 23   | 26   | 26   | 0.90     | 0.120083 | 25   | 0.94     | 0.158285 |
| 245766_at   | At1g33680 | hyothetical protein predicted by gene expressed protein                                       | 324  | 324  | 324  | 324  | 324  | 324  | 324  | 324  | 0.85  | 0.054588 | 155  | 162  | 157  | 248  | 197  | 185  | 172  | 162  | 158  | 193  | 0.82     | 0.134599 | 210  | 0.75     | 0.056472 |
| 245767_at   | At1g33610 | hyothetical protein similar to putative epsilon leucine-rich repeat family protein            | 34   | 41   | 35   | 40   | 44   | 34   | 37   | 40   | 0.93  | 0.501308 | 35   | 31   | 43   | 29   | 28   | 33   | 36   | 35   | 36   | 32   | 1.13     | 0.244532 | 30   | 1.22     | 0.153887 |
| 245768_at   | At1g33590 | hyothetical protein similar to putative epsilon leucine-rich repeat family protein            | 321  | 420  | 460  | 290  | 452  | 280  | 401  | 341  | 1.18  | 0.437951 | 320  | 353  | 264  | 270  | 246  | 265  | 329  | 312  | 312  | 284  | 1.10     | 0.362123 | 260  | 1.20     | 0.127810 |
| 245769_at   | At1g30220 | hyothetical protein similar to putative epsilon sugar transporter family protein              | 90   | 104  | 125  | 147  | 146  | 117  | 106  | 137  | 0.78  | 0.096642 | 105  | 103  | 117  | 145  | 118  | 128  | 176  | 167  | 108  | 147  | 0.74     | 0.042910 | 130  | 0.83     | 0.073642 |
| 245770_at   | At1g30240 | hyothetical protein predicted by gene PELP1-related                                           | 129  | 145  | 161  | 183  | 193  | 152  | 145  | 176  | 0.82  | 0.110519 | 120  | 91   | 130  | 160  | 126  | 116  | 131  | 117  | 113  | 130  | 0.87     | 0.273774 | 134  | 0.85     | 0.309183 |
| 245771_at   | At1g30250 | hyothetical protein predicted by gene expressed protein                                       | 51   | 57   | 72   | 72   | 75   | 72   | 60   | 73   | 0.82  | 0.106788 | 45   | 39   | 55   | 47   | 42   | 49   | 42   | 49   | 46   | 46   | 1.01     | 0.892975 | 46   | 1.01     | 0.951975 |
| 245772_at   | At1g30300 | hyothetical protein similar to putative epsilon expressed protein                             | 174  | 204  | 235  | 255  | 288  | 238  | 204  | 260  | 0.78  | 0.071218 | 191  | 222  | 220  | 272  | 237  | 215  | 250  | 244  | 211  | 242  | 0.87     | 0.063088 | 241  | 0.88     | 0.219277 |
| 245773_at   | At1g30290 | hyothetical protein predicted by gene expressed protein                                       | 137  | 172  | 181  | 205  | 215  | 197  | 163  | 206  | 0.77  | 0.042625 | 151  | 139  | 166  | 206  | 188  | 183  | 177  | 152  | 182  | 182  | 0.83     | 0.042330 | 184  | 0.83     | 0.118192 |
| 245774_at   | At1g30210 | hyothetical protein contains similarity to TCF family transcription factor, putative          | 252  | 306  | 277  | 404  | 425  | 323  | 278  | 384  | 0.72  | 0.038776 | 227  | 189  | 228  | 370  | 295  | 285  | 288  | 274  | 214  | 302  | 1.01     | 0.012215 | 317  | 0.68     | 0.025878 |
| 245775_at   | At1g30270 | serine/threonine kinase, putative simils CBL-interacting protein kinase 23 (CIPK)             | 237  | 296  | 383  | 351  | 356  | 325  | 289  | 344  | 0.84  | 0.130353 | 215  | 165  | 215  | 299  | 258  | 244  | 211  | 244  | 198  | 250  | 0.79     | 0.062678 | 255  | 0.78     | 0.138069 |
| 245776_at   | At1g30260 | hyothetical protein predicted by gene expressed protein                                       | 21   | 20   | 28   | 19   | 24   | 21   | 23   | 21   | 1.07  | 0.635095 | 16   | 24   | 22   | 22   | 19   | 18   | 20   | 22   | 20   | 20   | 1.00     | 0.969057 | 20   | 1.03     | 0.855094 |
| 245777_at   | At1g3540  | unknown protein contains similarity to c MuTf1/nudix family protein                           | 568  | 636  | 695  | 784  | 922  | 502  | 623  | 736  | 0.86  | 0.467477 | 168  | 192  | 171  | 309  | 227  | 225  | 289  | 272  | 177  | 264  | 0.67     | 0.009000 | 254  | 0.70     | 0.059575 |
| 245778_at   | At1g73530 | RNA-binding divicine-rich protein, tRNA recognition motif (RRM)-containing                    | 55   | 95   | 111  | 89   | 99   | 79   | 90   | 89   | 1.00  | 0.985552 | 77   | 101  | 96   | 117  | 93   | 91   | 113  | 100  | 91   | 103  | 0.89     | 0.23184  | 100  | 0.91     | 0.455308 |
| 245779_s_at | At1g73510 | hyothetical protein predicted by gene expressed protein                                       | 9    | 12   | 19   | 19   | 19   | 19   | 12   | 13   | 1.02  | 0.860765 | 11   | 9    | 14   | 9    | 14   | 9    | 14   | 10   | 9    | 9    | 1.02     | 0.503687 | 9    | 1.02     | 0.455308 |
| 245782_at   | At1g73460 | hyothetical protein similar to Ser-Tsr c protein kinase, putative /// protein kinase          | 316  | 369  | 373  | 433  | 493  | 378  | 353  | 434  | 0.81  | 0.097635 | 326  | 246  | 314  | 411  | 387  | 304  | 413  | 403  | 295  | 383  | 0.77     | 0.035694 | 367  | 0.80     | 0.152621 |
| 245722_at   | At1g73430 | unknown protein                                                                               | 180  | 199  | 216  | 260  | 248  | 219  | 191  | 242  | 0.79  | 0.068764 | 110  | 113  | 137  | 168  | 136  | 111  | 149  | 137  | 120  | 140  | 0.86     | 0.196538 | 138  | 0.87     | 0.380981 |
| 245723_at   | At1g73400 | hyothetical protein predicted by gene expressed protein                                       | 82   | 107  | 126  | 125  | 130  | 102  | 105  | 119  | 0.88  | 0.412650 | 85   | 73   | 80   | 107  | 95   | 85   | 90   | 87   | 82   | 93   | 0.89     | 0.156326 | 96   | 0.86     | 0.176007 |
| 245724_at   | At1g73390 | hyothetical protein predicted by gene expressed protein                                       | 169  | 209  | 202  | 209  | 209  | 189  | 209  | 202  | 1.03  | 0.730091 | 169  | 157  | 200  | 280  | 184  | 200  | 215  | 210  | 176  | 216  | 0.80     | 0.121061 | 221  | 0.79     | 0.045308 |
| 245725_at   | At1g73370 | sucrose synthase, putative similar to s sucrose synthase, putative / sucrose-UC               | 67   | 85   | 81   | 115  | 134  | 98   | 78   | 116  | 0.67  | 0.031740 | 54   | 45   | 59   | 79   | 68   | 64   | 64   | 66   | 53   | 68   | 0.77     | 0.018128 | 70   | 0.75     | 0.044753 |
| 245726_at   | At1g73360 | homeobox protein, putative similar to h homeobox-leucine zipper family protein                | 63   | 79   | 63   | 53   | 66   | 51   | 68   | 56   | 1.21  | 0.169584 | 25   | 18   | 27   | 23   | 21   | 22   | 24   | 19   | 23   | 22   | 1.07     | 0.566694 | 22   | 1.05     | 0.697769 |
| 245727_at   | At1g73350 | hyothetical protein contains similarity to expressed protein                                  | 107  | 149  | 138  | 160  | 177  | 146  | 131  | 161  | 0.81  | 0.123616 | 138  | 132  | 155  | 224  | 179  | 156  | 160  | 154  | 142  | 175  | 0.81     | 0.120127 | 188  | 0.76     | 0.101953 |
| 245728_at   | At1g73340 | stereol 22-alpha-hydroxylase, putative similar to RRM1-containing                             | 1060 | 1244 | 1348 | 1461 | 1574 | 1308 | 1217 | 1447 | 0.84  | 0.113887 | 1169 | 1243 | 1404 | 1895 | 1663 | 1465 | 1360 | 1329 | 1272 | 1542 | 0.82     | 0.120066 | 1676 | 0.74     | 0.07541  |
| 245729_at   | At1g73400 | unknown protein                                                                               | 107  | 149  | 138  | 160  | 177  | 146  | 131  | 161  | 0.81  | 0.123616 | 138  | 132  | 155  | 224  | 179  | 156  | 160  | 154  | 142  | 175  | 0.81     | 0.120127 | 188  | 0.76     | 0.101953 |
| 245730_at   | At1g73470 | unknown protein: supported by full-length expressed protein                                   | 167  | 242  | 347  | 241  | 249  | 275  | 213  | 227  | 0.92  | 0.623736 | 278  | 292  | 263  | 410  | 348  | 301  | 368  | 342  | 278  | 354  | 0.78     | 0.029032 | 353  | 0.79     | 0.082361 |
| 245731_at   | At1g73500 | MAP kinase, putative similar to MAP k1 mitogen-activated protein kinase kinase                | 141  | 167  | 208  | 301  | 287  | 235  | 172  | 274  | 0.63  | 0.022270 | 180  | 220  | 220  | 301  | 308  | 265  | 340  | 358  | 207  | 314  | 0.66     | 0.003918 | 291  | 0.71     | 0.010910 |
| 245732_at   | At1g73440 | hyothetical protein contains similarity to c calmodulin-related                               | 130  | 175  | 183  | 200  | 215  | 175  | 163  | 197  | 0.83  | 0.07197  | 186  | 179  | 195  | 259  | 217  | 204  | 161  | 190  | 187  | 206  | 0.80     | 0.389597 | 227  | 0.82     | 0.083300 |
| 245733_at   | At1g73380 | hyothetical protein predicted by gene expressed protein                                       | 215  | 215  | 208  | 215  | 185  | 193  | 210  | 208  | 0.88  | 0.429875 | 204  | 217  | 200  | 288  | 245  | 236  | 207  | 263  | 208  | 263  | 0.79     | 0.004654 | 272  | 0.82     | 0.023288 |
| 245734_at   | At1g73480 | lysophospholipase homolog, putative epsilon lysophospholipase, alpha/beta fold family protein | 55   | 81   | 153  | 74   | 117  | 66   | 96   | 85   | 1.13  | 0.754701 | 54   | 56   | 53   | 68   | 65   | 64   | 83   | 81   | 54   | 72   | 0.75     | 0.018364 | 66   | 0.83     | 0.002690 |
| 245735_at   | At1g73410 | myb-like transcription factor, putative s myb family transcription factor (MYB54)             | 13   | 16   | 14   | 15   | 20   | 13   | 14   | 16   | 0.89  | 0.443322 | 10   | 9    | 12   | 9    | 15   | 10   | 13   | 10   | 10   | 11   | 0.93     | 0.617904 | 11   | 0.93     | 0.699210 |
| 245736_at   | At1g73330 | DNA topoisomerase II identical to DNA topoisomerase II, putative (DNA)                        | 35   | 44   | 18   | 47   | 52   | 46   | 44   | 48   | 0.91  | 0.510964 | 42   | 37   | 52   | 38   | 30   | 34   | 43   | 50   | 44   | 39   | 1.12     | 0.441286 | 34   | 1.29     | 0.132979 |
| 245737_at   | At1g44160 | hyothetical protein similar to putative epsilon DNA1 chaperone C-terminal domain-cor          | 94   | 100  | 118  | 103  | 94   | 77   | 104  | 91   | 1.13  | 0.807953 | 103  | 78   | 113  | 95   | 84   | 81   | 79   | 112  | 85   | 84   | 1.34     | 0.001919 | 85   | 1.31     | 0.019637 |
| 245738_at   | At1g44130 | nucleolin, putative similar to nucleolin G1: nucleolin protein, putative                      | 91   | 113  | 148  | 111  | 9    | 8    | 117  | 10   | 12.30 | 0.020988 | 70   | 105  | 106  | 7    | 8    | 9    | 9    | 9    | 9    | 9    | 11.16    | 0.000687 | 8    |          |          |

|             |           |                                                                                          |                                                                                   |      |      |      |      |      |      |      |      |          |          |      |      |      |      |      |      |      |      |      |      |          |          |      |          |          |
|-------------|-----------|------------------------------------------------------------------------------------------|-----------------------------------------------------------------------------------|------|------|------|------|------|------|------|------|----------|----------|------|------|------|------|------|------|------|------|------|------|----------|----------|------|----------|----------|
| 245687_at   | At1g28320 | unknown protein                                                                          | protease-related                                                                  | 146  | 215  | 232  | 226  | 252  | 202  | 198  | 227  | 0.87     | 0.389300 | 167  | 169  | 176  | 231  | 189  | 166  | 225  | 211  | 170  | 204  | 0.83     | 0.079143 | 195  | 0.87     | 0.263216 |
| 245688_at   | At1g28290 | prolin-rich protein, putative similar to p pollen Ole 1 allergen and extensin fam        |                                                                                   | 2665 | 3258 | 2696 | 3225 | 3798 | 2638 | 2873 | 3220 | 0.89     | 0.419393 | 1623 | 1196 | 1526 | 2416 | 2093 | 1882 | 2005 | 1890 | 1448 | 2057 | 0.70     | 0.009185 | 2130 | 0.68     | 0.027912 |
| 245689_at   | At1g28270 | unknown protein predicted by gene rald alkalization factor (RALF) family                 |                                                                                   | 48   | 33   | 46   | 27   | 35   | 20   | 42   | 27   | 1.54     | 0.078822 | 16   | 24   | 24   | 16   | 11   | 26   | 15   | 16   | 21   | 17   | 1.26     | 0.274024 | 18   | 1.20     | 0.506031 |
| 245690_at   | At1g28260 | unknown protein predicted by gene rald alkalization factor (RALF) family                 |                                                                                   | 136  | 173  | 162  | 173  | 149  | 173  | 149  | 169  | 1.04     | 0.142144 | 133  | 149  | 189  | 191  | 170  | 153  | 123  | 191  | 170  | 176  | 0.93     | 0.023601 | 106  | 0.95     | 0.10381  |
| 245690_at   | At1g28240 | unknown protein                                                                          | expressed protein                                                                 | 103  | 109  | 125  | 140  | 150  | 121  | 112  | 137  | 0.82     | 0.084213 | 77   | 70   | 76   | 94   | 80   | 72   | 83   | 78   | 74   | 81   | 0.91     | 0.206346 | 82   | 0.91     | 0.319234 |
| 245691_at   | At1g28220 | purine permease, putative similar to p <sub>u</sub> purine permease, putative            |                                                                                   | 82   | 100  | 118  | 106  | 123  | 105  | 100  | 112  | 0.90     | 0.388158 | 75   | 88   | 103  | 82   | 76   | 80   | 82   | 84   | 89   | 81   | 1.10     | 0.240594 | 79   | 1.12     | 0.309746 |
| 245692_at   | At1g28190 | unknown protein predicted by gene expressed protein                                      |                                                                                   | 132  | 188  | 201  | 167  | 202  | 166  | 174  | 178  | 0.97     | 0.863131 | 104  | 140  | 121  | 259  | 157  | 175  | 189  | 201  | 122  | 196  | 0.62     | 0.022454 | 197  | 0.62     | 0.086538 |
| 245693_at   | At1g28170 | deroxyl sulfotransferase, putative simi sulfotransferase family protein                  |                                                                                   | 26   | 31   | 39   | 34   | 36   | 36   | 32   | 35   | 0.90     | 0.394541 | 30   | 33   | 39   | 31   | 39   | 31   | 34   | 39   | 31   | 34   | 0.99     | 0.117757 | 37   | 0.99     | 0.228176 |
| 245694_at   | At1g28327 | unknown protein predicted by gene hypothetical protein                                   |                                                                                   | 26   | 29   | 35   | 31   | 38   | 28   | 28   | 22   | 0.88     | 0.458583 | 23   | 22   | 22   | 24   | 16   | 23   | 24   | 27   | 21   | 23   | 0.98     | 0.864499 | 21   | 1.06     | 0.660580 |
| 245695_at   | At1g28250 | unknown protein :supported by full-length expressed protein                              |                                                                                   | 229  | 332  | 296  | 328  | 334  | 283  | 286  | 315  | 0.91     | 0.438410 | 271  | 319  | 338  | 403  | 302  | 309  | 245  | 258  | 309  | 303  | 1.02     | 0.887352 | 338  | 0.91     | 0.483073 |
| 245696_at   | At1g28280 | hypothetical protein predicted by gene VQ motif-containing protein                       |                                                                                   | 239  | 269  | 288  | 240  | 247  | 210  | 261  | 232  | 1.12     | 0.176890 | 248  | 249  | 277  | 365  | 255  | 246  | 270  | 266  | 258  | 281  | 0.92     | 0.479574 | 289  | 0.89     | 0.483824 |
| 245697_at   | At1g28260 | FH protein interacting protein FIP1 lter GRAM domain-containing protein / ABA            |                                                                                   | 480  | 596  | 585  | 640  | 726  | 541  | 548  | 636  | 0.86     | 0.102414 | 631  | 686  | 665  | 841  | 699  | 870  | 722  | 685  | 661  | 723  | 0.91     | 0.190555 | 737  | 0.90     | 0.240737 |
| 245698_at   | At1g28330 | dormancy-associated protein, putative dormancy-associated protein, putative (I           |                                                                                   | 1230 | 2507 | 3206 | 603  | 1545 | 572  | 2314 | 907  | 2.55     | 0.107199 | 1422 | 2614 | 1099 | 1182 | 884  | 1370 | 1849 | 1712 | 1430 | 1145 | 1.20     | 0.529317 | 1145 | 1.40     | 0.305184 |
| 245699_at   | At1g28300 | unknown protein contains similarly I                                                     | hypothetical protein predicted by gene hypothetical protein B3 family protein / I | 14   | 15   | 19   | 19   | 22   | 21   | 16   | 20   | 0.79     | 0.068645 | 14   | 13   | 18   | 16   | 19   | 15   | 23   | 18   | 15   | 18   | 0.81     | 0.154484 | 17   | 0.88     | 0.376151 |
| 245670_at   | At1g28210 | mitochondrial protein (AUI1), putative s DNAJ heat shock protein, putative               |                                                                                   | 132  | 174  | 176  | 207  | 255  | 196  | 161  | 219  | 0.73     | 0.065252 | 175  | 153  | 182  | 242  | 216  | 194  | 195  | 189  | 170  | 207  | 0.82     | 0.044599 | 218  | 0.78     | 0.044396 |
| 245671_at   | At1g28230 | purine permease identical to curine per purine permease (PUP1)                           |                                                                                   | 142  | 166  | 169  | 277  | 342  | 216  | 159  | 278  | 0.57     | 0.032127 | 118  | 110  | 119  | 155  | 143  | 130  | 129  | 135  | 116  | 139  | 0.84     | 0.041860 | 143  | 0.81     | 0.025967 |
| 245672_at   | At1g56710 | polysaccharuronase, putative similar to o glucoside hydrolase family 28 protein / o      |                                                                                   | 175  | 246  | 235  | 88   | 92   | 74   | 218  | 85   | 2.58     | 0.044220 | 216  | 220  | 270  | 124  | 109  | 94   | 73   | 68   | 235  | 94   | 2.51     | 0.000298 | 109  | 2.16     | 0.002915 |
| 245673_at   | At1g56690 | unknown protein similar to putative i pentatricarboxide (PPR) repeat-containi            |                                                                                   | 36   | 40   | 36   | 46   | 53   | 43   | 37   | 47   | 0.79     | 0.033238 | 40   | 35   | 41   | 48   | 35   | 34   | 48   | 38   | 39   | 40   | 0.96     | 0.702399 | 39   | 0.99     | 0.961579 |
| 245674_at   | At1g56680 | chitinase, putative similar to chitinase i (glycoside hydrolase family 19 protein        |                                                                                   | 5    | 8    | 14   | 16   | 15   | 10   | 15   | 0.67 | 0.046176 | 7        | 12   | 12   | 9    | 9    | 7    | 12   | 11   | 10   | 10   | 1.03 | 0.871411 | 8        | 1.18 | 0.447618 |          |
| 245675_at   | At1g56675 | hypothetical protein similar to putative r copia-like retrotransposon family             |                                                                                   | 45   | 68   | 57   | 52   | 48   | 55   | 53   | 52   | 1.02     | 0.807284 | 40   | 40   | 55   | 41   | 55   | 35   | 44   | 50   | 45   | 45   | 0.99     | 0.959078 | 43   | 1.03     | 0.878659 |
| 245676_at   | At1g56670 | nodule-specific protein, putative simila GDSL-motif lipase/hydrolase family prob         |                                                                                   | 62   | 68   | 75   | 73   | 77   | 69   | 75   | 0.92 | 0.276404 | 55       | 54   | 75   | 91   | 65   | 55   | 63   | 57   | 61   | 66   | 0.92 | 0.626031 | 71       | 0.87 | 0.494006 |          |
| 245677_at   | At1g56660 | unknown protein predicted by gene expressed protein                                      |                                                                                   | 31   | 21   | 31   | 40   | 38   | 30   | 27   | 36   | 0.77     | 0.144093 | 10   | 10   | 14   | 10   | 14   | 10   | 14   | 10   | 12   | 10   | 1.15     | 0.453609 | 9    | 1.32     | 0.177336 |
| 245678_at   | At1g56610 | unknown protein                                                                          | syntrain-related family protein                                                   | 130  | 170  | 207  | 213  | 220  | 177  | 169  | 203  | 0.83     | 0.250983 | 174  | 152  | 184  | 252  | 217  | 189  | 197  | 199  | 170  | 211  | 0.80     | 0.046495 | 220  | 0.77     | 0.070773 |
| 245679_at   | At1g55990 | clathrin-associated protein, putative sr clathrin adaptor complexes medium sub           |                                                                                   | 200  | 255  | 242  | 283  | 285  | 239  | 232  | 269  | 0.86     | 0.174614 | 239  | 251  | 271  | 353  | 274  | 236  | 253  | 278  | 254  | 279  | 0.91     | 0.396560 | 288  | 0.88     | 0.390635 |
| 245680_at   | At1g5570  | hypothetical protein contains similarly i pentatricarboxide (PPR) repeat-containi        |                                                                                   | 45   | 61   | 67   | 69   | 78   | 62   | 57   | 69   | 0.83     | 0.211117 | 34   | 32   | 43   | 40   | 35   | 39   | 30   | 37   | 37   | 0.99 | 0.900101 | 38       | 0.95 | 0.640008 |          |
| 245681_at   | At1g55650 | alkaline/neutral invertase, putative sim beta-fructofuranosidase, putative / invert      |                                                                                   | 156  | 197  | 216  | 237  | 258  | 203  | 190  | 233  | 0.82     | 0.147504 | 162  | 142  | 180  | 222  | 205  | 159  | 189  | 179  | 161  | 191  | 0.84     | 0.121296 | 195  | 0.82     | 0.191330 |
| 245654_at   | At1g55450 | disease resistance protein, putative sr disease resistance protein (TIR-NBS-LR           |                                                                                   | 18   | 17   | 27   | 22   | 26   | 20   | 23   | 0.90 | 0.577160 | 16       | 30   | 19   | 20   | 17   | 18   | 22   | 18   | 22   | 19   | 1.14 | 0.435291 | 19       | 1.17 | 0.482120 |          |
| 245655_at   | At1g55330 | hypothetical protein predicted by gene dermodaxoline-rich alcoholprotein family c        |                                                                                   | 4    | 0    | 1    | 2    | 2    | 1    | 2    | 2    | 0.99     | 0.989491 | 2    | 2    | 3    | 2    | 3    | 4    | 2    | 2    | 3    | 0.74 | 0.270191 | 3        | 0.76 | 0.327550 |          |
| 245656_at   | At1g56620 | hypothetical protein predicted by gene octadecanoyltransferase inhibitor domain-containi |                                                                                   | 35   | 55   | 50   | 50   | 50   | 26   | 190  | 0.90 | 0.044275 | 253      | 245  | 264  | 238  | 17   | 15   | 19   | 25   | 19   | 252  | 19   | 13.28    | 0.000000 | 17   | 14.67    | 0.000007 |
| 245657_at   | At1g56720 | unknown protein similar to receptor-like protein kinase family protein                   |                                                                                   | 153  | 259  | 297  | 356  | 243  | 209  | 297  | 0.65 | 0.084658 | 136      | 130  | 130  | 166  | 158  | 167  | 158  | 166  | 176  | 168  | 176  | 0.91     | 0.018661 | 176  | 0.93     | 0.062144 |
| 245626_at   | At1g56700 | unknown protein :supported by full-length cyclodextrin-carboxylate peptidase fami        |                                                                                   | 710  | 890  | 885  | 1295 | 1255 | 1018 | 862  | 1190 | 0.72     | 0.050153 | 1248 | 1404 | 1377 | 1891 | 1490 | 1418 | 1564 | 1587 | 1343 | 1590 | 0.84     | 0.072133 | 1600 | 0.84     | 0.172446 |
| 245627_at   | At1g56600 | water stress-induced protein, putative i galactinol synthase, putative                   |                                                                                   | 38   | 43   | 51   | 98   | 48   | 44   | 44   | 63   | 0.70     | 0.345521 | 33   | 31   | 35   | 34   | 30   | 31   | 35   | 29   | 33   | 32   | 1.06     | 0.324803 | 31   | 1.06     | 0.321859 |
| 245628_at   | At1g56650 | anthocyanin-2, putative similar to antho myb family transcription factor (MYB75)         |                                                                                   | 24   | 24   | 29   | 20   | 21   | 26   | 25   | 23   | 1.10     | 0.448044 | 24   | 20   | 29   | 24   | 19   | 18   | 31   | 24   | 24   | 23   | 1.04     | 0.805121 | 20   | 1.19     | 0.284030 |
| 245629_at   | At1g56280 | hypothetical protein predicted by gene expressed protein                                 |                                                                                   | 904  | 980  | 856  | 1490 | 1428 | 1302 | 913  | 1406 | 0.65     | 0.001716 | 1319 | 1289 | 1448 | 1956 | 1369 | 1176 | 1117 | 1093 | 1353 | 1338 | 1.01     | 0.951107 | 1494 | 0.90     | 0.575660 |
| 245630_at   | At1g53630 | hypothetical protein similar to putative i pentatricarboxide (PPR) repeat-containi       |                                                                                   | 93   | 92   | 137  | 138  | 130  | 132  | 108  | 133  | 0.81     | 0.163910 | 62   | 53   | 82   | 76   | 60   | 65   | 99   | 78   | 66   | 76   | 0.87     | 0.042469 | 67   | 0.98     | 0.908710 |
| 245631_at   | At1g25350 | IRNA-utlamine synthetase, putative s glutamine-IRNA kinase, putative / glutam            |                                                                                   | 557  | 692  | 678  | 725  | 795  | 634  | 642  | 718  | 0.89     | 0.269354 | 553  | 499  | 645  | 786  | 676  | 561  | 709  | 665  | 566  | 679  | 0.83     | 0.095698 | 674  | 0.84     | 0.233977 |
| 245632_at   | At1g25290 | unknown protein contains similarly to r rhomboid family protein                          |                                                                                   | 150  | 198  | 232  | 236  | 259  | 210  | 193  | 235  | 0.82     | 0.202601 | 193  | 189  | 194  | 302  | 243  | 224  | 242  | 237  | 192  | 250  | 0.77     | 0.018672 | 256  | 0.75     | 0.052249 |
| 245633_at   | At1g25810 | unknown protein similar to putative Tab F-box family protein / lubby family protei       |                                                                                   | 603  | 615  | 782  | 863  | 659  | 575  | 769  | 0.75 | 0.050414 | 554      | 461  | 514  | 843  | 653  | 615  | 812  | 731  | 559  | 731  | 676  | 0.78     | 0.019227 | 704  | 0.72     | 0.022866 |
| 245634_at   | At1g25270 | MIN21 nodulin protein, similarly to nodulin MIN21 family protein                         |                                                                                   | 27   | 25   | 35   | 36   | 35   | 29   | 35   | 0.83 | 0.114017 | 25       | 25   | 31   | 26   | 27   | 20   | 28   | 22   | 27   | 23   | 1.20 | 0.185925 | 21       | 1.28 | 0.153868 |          |
| 245635_at   | At1g25250 | zinc finger protein ID1, putative similar zinc finger (C2H2-type) family protein         |                                                                                   | 30   | 42   | 44   | 44   | 55   | 51   | 39   | 50   | 0.77     | 0.100155 | 33   | 41   | 43   | 54   | 44   | 46   | 58   | 44   | 39   | 49   | 0.80     | 0.065355 | 48   | 0.81     | 0.106537 |
| 245636_at   | At1g25240 | hypothetical protein similar to hypothei ensin N-terminal homolog (ENTH) dom             |                                                                                   | 39   | 39   | 44   | 45   | 45   | 35   | 36   | 40   | 0.88     | 0.558357 | 27   | 36   | 35   | 33   | 24   | 23   | 41   | 34   | 33   | 31   | 1.06     | 0.730850 | 27   | 1.24     | 0.199678 |
| 245637_at   | At1g22330 | hypothetical protein similar to putative c purple acid phosphatase family protein        |                                                                                   | 41   | 41   | 67   | 67   | 70   | 55   | 56   | 61   | 0.87     | 0.432577 | 70   | 58   | 66   | 85   | 74   | 76   | 67   | 67   | 81   | 1.07 | 0.694792 | 88       | 0.99 | 0.953996 |          |
| 245638_s_at | At1g24986 | FS49-10 unknown protein; similar to E: expressed protein                                 |                                                                                   | 140  | 187  | 108  | 137  | 106  | 112  | 145  | 119  | 1.22     | 0.345353 | 141  | 163  | 173  | 142  | 137  | 107  | 163  | 115  | 129  | 125  | 1.32     | 0.024634 | 129  | 1.25     | 0.133440 |
| 245639_at   | At1g25260 | unknown protein contains similarly to E: acidic ribosomal protein P0-related             |                                                                                   | 1066 | 1428 | 1628 | 1499 | 1630 | 1278 | 1374 | 1469 | 0.94     | 0.648285 | 1300 | 1386 | 1378 | 1974 | 1468 | 1537 | 1535 | 1456 | 1354 | 1594 | 0.85     | 0.115231 | 1660 | 0.82     | 0.130337 |
| 245640_at   | At1g25330 | helix-loop-helix protein homolog, putat basic helix-loop-helix (bHLH) family prot        |                                                                                   | 173  | 386  | 139  | 875  | 714  | 491  | 233  | 693  | 0.34     | 0.027357 | 143  | 154  | 188  | 911  | 621  | 643  | 555  | 520  | 162  | 650  | 0.25     | 0.001849 | 725  | 0.22     | 0.003923 |
| 245641_at   | At1g25370 | Expressed protein : supported by full-length expressed protein                           |                                                                                   | 136  | 145  | 192  | 170  | 181  | 160  | 158  | 170  | 0.92     | 0.521656 | 131  | 124  | 151  | 157  | 128  | 124  | 164  | 141  | 135  | 143  | 0.95     | 0.558837 | 136  | 0.99     | 0.949514 |
| 245642_at   | At1g25275 | Expressed protein : supported by full-length expressed protein                           |                                                                                   | 132  | 512  | 672  | 365  | 227  | 407  | 271  | 163  | 0.105014 | 473      | 859  | 580  | 773  | 858  | 64   |      |      |      |      |      |          |          |      |          |          |

|           |           |                                           |                                            |     |     |      |     |      |     |     |      |          |          |     |     |     |      |     |     |     |     |     |      |          |          |      |          |          |
|-----------|-----------|-------------------------------------------|--------------------------------------------|-----|-----|------|-----|------|-----|-----|------|----------|----------|-----|-----|-----|------|-----|-----|-----|-----|-----|------|----------|----------|------|----------|----------|
| 245568_at | Ak4g14650 | hypothetical protein                      | expressed protein                          | 31  | 36  | 40   | 39  | 38   | 38  | 36  | 38   | 0.93     | 0.409280 | 32  | 31  | 37  | 32   | 25  | 29  | 29  | 31  | 33  | 29   | 1.14     | 0.102335 | 28   | 1.16     | 0.177477 |
| 245569_at | Ak4g14660 | RNA polymerase II fifth largest subunit   | RNA polymerase Rpb7 N-terminal doma        | 243 | 345 | 353  | 390 | 426  | 308 | 314 | 375  | 0.84     | 0.206637 | 344 | 312 | 342 | 467  | 373 | 375 | 359 | 375 | 333 | 390  | 0.85     | 0.079637 | 405  | 0.82     | 0.090788 |
| 245570_at | Ak4g14670 | heat shock protein 101 (HSP101) outa      | heat shock protein 101: putative / HSP101  | 22  | 20  | 27   | 28  | 24   | 23  | 22  | 25   | 0.88     | 0.338781 | 15  | 18  | 17  | 18   | 12  | 14  | 18  | 15  | 17  | 15   | 1.10     | 0.427006 | 14   | 1.16     | 0.343231 |
| 245571_at | Ak4g14680 | light inducible protein like              | expressed protein                          | 118 | 190 | 267  | 281 | 213  | 146 | 250 | 127  | 0.89     | 0.206637 | 191 | 177 | 207 | 407  | 269 | 269 | 291 | 208 | 192 | 261  | 0.70     | 0.140811 | 312  | 0.70     | 0.059548 |
| 245572_at | Ak4g14720 | hypothetical protein                      | expressed protein                          | 442 | 721 | 777  | 520 | 716  | 502 | 647 | 580  | 1.12     | 0.618441 | 445 | 522 | 441 | 649  | 482 | 478 | 572 | 538 | 469 | 544  | 0.86     | 0.159333 | 536  | 0.87     | 0.340472 |
| 245573_at | Ak4g14730 | hypothetical protein                      | transmembrane protein-related              | 750 | 816 | 1024 | 926 | 1049 | 884 | 863 | 953  | 0.91     | 0.405802 | 702 | 848 | 807 | 1140 | 782 | 840 | 839 | 839 | 785 | 888  | 0.88     | 0.304122 | 921  | 0.85     | 0.320185 |
| 245574_at | Ak4g14750 | hypothetical protein                      | calmodulin-binding family protein          | 58  | 62  | 75   | 83  | 83   | 89  | 65  | 85   | 0.77     | 0.021258 | 58  | 72  | 71  | 94   | 63  | 58  | 66  | 58  | 67  | 68   | 0.99     | 0.923112 | 72   | 0.93     | 0.713548 |
| 245575_at | Ak4g14760 | M protein repeat-containing homolog       | M protein repeat-containing protein        | 86  | 161 | 127  | 161 | 145  | 145 | 161 | 127  | 0.87     | 0.057743 | 73  | 61  | 89  | 74   | 105 | 105 | 74  | 105 | 105 | 74   | 1.07     | 0.057743 | 103  | 0.71     | 0.111714 |
| 245576_at | Ak4g14770 | hypothetical protein                      | tesmin/TSO-1 like CXC domain-containir     | 61  | 205 | 213  | 251 | 282  | 217 | 193 | 250  | 0.77     | 0.080507 | 114 | 95  | 130 | 168  | 133 | 143 | 148 | 135 | 113 | 143  | 0.79     | 0.040195 | 144  | 0.78     | 0.110205 |
| 245577_at | Ak4g14780 | kinase like protein                       | kinase like protein, putative              | 36  | 55  | 51   | 57  | 62   | 50  | 47  | 56   | 0.84     | 0.260106 | 51  | 46  | 47  | 37   | 41  | 42  | 55  | 47  | 48  | 44   | 1.08     | 0.427922 | 40   | 1.20     | 0.016404 |
| 245578_at | Ak4g14790 | RNA helicase like protein                 | ATP-dependent RNA helicase, mitocho        | 88  | 101 | 113  | 112 | 97   | 89  | 107 | 83   | 0.89     | 0.089724 | 59  | 64  | 73  | 82   | 64  | 61  | 76  | 67  | 65  | 70   | 0.93     | 0.456747 | 69   | 0.95     | 0.651158 |
| 245579_at | Ak4g14810 | hypothetical protein                      | hypothetical protein                       | 50  | 56  | 89   | 69  | 79   | 65  | 73  | 89   | 0.89     | 0.563064 | 32  | 36  | 40  | 38   | 39  | 40  | 75  | 49  | 38  | 48   | 0.78     | 0.316774 | 39   | 0.86     | 0.734054 |
| 245580_at | Ak4g14820 | hypothetical protein                      | pentatricopeptide (PPR) repeat-containi    | 51  | 63  | 80   | 78  | 79   | 78  | 69  | 86   | 0.76     | 0.404983 | 45  | 39  | 57  | 56   | 43  | 45  | 48  | 47  | 50  | 0.94 | 0.805818 | 47       | 0.99 | 0.940171 |          |
| 245581_at | Ak4g14840 | hypothetical protein                      | expressed protein                          | 90  | 115 | 131  | 132 | 141  | 104 | 112 | 125  | 0.89     | 0.456865 | 121 | 114 | 119 | 157  | 127 | 135 | 143 | 136 | 118 | 140  | 0.84     | 0.017782 | 140  | 0.84     | 0.072517 |
| 245582_at | Ak4g14850 | hypothetical protein                      | pentatricopeptide (PPR) repeat-containi    | 42  | 45  | 40   | 47  | 50   | 43  | 43  | 47   | 0.91     | 0.201963 | 37  | 35  | 42  | 46   | 40  | 35  | 40  | 37  | 38  | 39   | 0.97     | 0.671340 | 40   | 0.95     | 0.592909 |
| 245583_at | Ak4g14920 | hypothetical protein                      | PHD finger transcription factor, putative  | 146 | 195 | 187  | 231 | 233  | 204 | 176 | 223  | 0.79     | 0.057523 | 118 | 106 | 137 | 191  | 145 | 117 | 172 | 158 | 121 | 157  | 0.77     | 0.090678 | 151  | 0.80     | 0.262679 |
| 245584_at | Ak4g14940 | amine oxidase like protein                | acid phosphatase survival protein SurE.    | 23  | 26  | 25   | 25  | 29   | 27  | 25  | 27   | 0.92     | 0.245988 | 12  | 18  | 20  | 20   | 14  | 15  | 21  | 24  | 17  | 19   | 0.89     | 0.510372 | 17   | 1.02     | 0.917880 |
| 245585_at | Ak4g14970 | hypothetical                              | hypothetical protein                       | 64  | 78  | 82   | 86  | 74   | 73  | 80  | 0.90 | 0.240742 | 47       | 40  | 58  | 63  | 52   | 45  | 54  | 50  | 48  | 53  | 0.91 | 0.419470 | 53       | 0.90 | 0.518554 |          |
| 245586_at | Ak4g14980 | hypothetical protein                      | DC1 domain-containing protein              | 22  | 24  | 32   | 28  | 33   | 29  | 26  | 30   | 0.88     | 0.330898 | 24  | 17  | 23  | 22   | 21  | 17  | 19  | 23  | 21  | 20   | 1.05     | 0.633132 | 20   | 1.07     | 0.634712 |
| 245587_at | Ak4g15020 | putative protein                          | expressed protein                          | 119 | 145 | 160  | 202 | 190  | 155 | 141 | 182  | 0.78     | 0.091735 | 70  | 70  | 76  | 100  | 82  | 71  | 76  | 71  | 72  | 80   | 0.90     | 0.316817 | 85   | 0.85     | 0.220423 |
| 245588_at | Ak4g15030 | putative protein                          | expressed protein                          | 53  | 84  | 80   | 90  | 96   | 75  | 72  | 87   | 0.83     | 0.281759 | 84  | 63  | 90  | 118  | 86  | 93  | 96  | 87  | 94  | 85   | 0.87     | 0.133689 | 100  | 0.86     | 0.215304 |
| 245589_at | Ak4g15040 | subtilisin-like serine protease contains  | subtilase family protein                   | 154 | 169 | 190  | 22  | 23   | 26  | 171 | 23   | 7.33     | 0.000154 | 71  | 55  | 73  | 16   | 15  | 13  | 24  | 14  | 66  | 17   | 4.10     | 0.000555 | 15   | 4.50     | 0.000866 |
| 245590_at | Ak4g15060 | hypothetical protein                      | F-box protein-related                      | 41  | 41  | 66   | 52  | 48   | 69  | 50  | 57   | 0.88     | 0.542230 | 41  | 31  | 61  | 41   | 40  | 40  | 39  | 40  | 44  | 40   | 1.01     | 0.537939 | 40   | 1.09     | 0.689962 |
| 245591_at | Ak4g15100 | hydroxynitrile lyase like protein         | serine carboxypeptidase S10 family erot    | 13  | 18  | 16   | 17  | 23   | 14  | 16  | 18   | 0.87     | 0.441120 | 14  | 16  | 12  | 15   | 11  | 14  | 18  | 14  | 14  | 15   | 0.98     | 0.839485 | 13   | 1.06     | 0.694316 |
| 245592_at | Ak4g15110 | cytochrome P450 like protein              | cytochrome P450 3B3, putative (CYP9        | 162 | 252 | 247  | 230 | 266  | 225 | 220 | 240  | 0.92     | 0.572563 | 172 | 162 | 206 | 270  | 204 | 190 | 227 | 228 | 187 | 224  | 0.84     | 0.103344 | 221  | 0.84     | 0.268171 |
| 245593_at | Ak4g15130 | putative phosphocholine cytidyl/transfera | cholinephosphate cytidyltransferase, p     | 194 | 261 | 276  | 306 | 329  | 272 | 244 | 303  | 0.81     | 0.121542 | 196 | 172 | 201 | 293  | 224 | 221 | 208 | 197 | 190 | 229  | 0.83     | 0.148694 | 246  | 0.77     | 0.088472 |
| 245594_at | Ak4g15150 | hypothetical protein                      | glycine-rich protein                       | 21  | 29  | 41   | 35  | 36   | 35  | 29  | 35   | 0.82     | 0.378949 | 16  | 24  | 22  | 20   | 23  | 18  | 27  | 21  | 21  | 22   | 0.95     | 0.722385 | 20   | 1.02     | 0.897070 |
| 245595_at | Ak4g15160 | cell wall protein like                    | protease inhibitor/seed storage/lipid tran | 88  | 89  | 134  | 282 | 206  | 141 | 103 | 210  | 0.49     | 0.070974 | 349 | 251 | 339 | 818  | 624 | 682 | 653 | 673 | 313 | 686  | 0.46     | 0.000322 | 701  | 0.45     | 0.004397 |
| 245596_at | Ak4g15200 | hypothetical protein                      | SET domain-containing protein              | 153 | 221 | 201  | 225 | 230  | 164 | 192 | 206  | 0.93     | 0.638612 | 104 | 76  | 103 | 117  | 108 | 97  | 114 | 106 | 94  | 108  | 0.87     | 0.141469 | 107  | 0.88     | 0.305447 |
| 245597_at | Ak4g15210 | hypothetical protein                      | hypothetical protein                       | 13  | 21  | 284  | 274 | 271  | 23  | 11  | 273  | 0.08     | 0.000164 | 48  | 21  | 22  | 23   | 24  | 22  | 23  | 24  | 22  | 24   | 1.02     | 0.895653 | 167  | 0.94     | 0.050354 |
| 245598_at | Ak4g15280 | p140Dia like protein                      | formin homolog 2 domain-containing pr      | 23  | 22  | 20   | 129 | 128  | 137 | 28  | 131  | 0.21     | 0.000699 | 31  | 28  | 40  | 140  | 94  | 77  | 97  | 91  | 33  | 100  | 0.33     | 0.003521 | 104  | 0.32     | 0.020904 |
| 245599_at | Ak4g15220 | ABC transporter homolog                   | ABC transporter family protein             | 42  | 51  | 64   | 50  | 56   | 50  | 52  | 52   | 1.01     | 0.959979 | 38  | 37  | 41  | 37   | 35  | 34  | 39  | 41  | 38  | 37   | 1.03     | 0.628523 | 35   | 1.09     | 0.133656 |
| 245600_at | Ak4g15230 | ABC transporter like protein              | ABC transporter family protein             | 42  | 52  | 68   | 56  | 63   | 58  | 54  | 59   | 0.92     | 0.573397 | 47  | 37  | 56  | 46   | 35  | 43  | 46  | 46  | 46  | 43   | 1.07     | 0.559704 | 42   | 1.12     | 0.479163 |
| 245601_at | Ak4g15240 | hypothetical protein                      | fringe-related protein                     | 41  | 61  | 70   | 66  | 73   | 57  | 68  | 65   | 0.88     | 0.473312 | 41  | 39  | 46  | 47   | 41  | 40  | 38  | 42  | 43  | 43   | 0.97     | 0.685182 | 43   | 0.98     | 0.778674 |
| 245602_at | Ak4g15250 | CONSTANS like protein                     | zinc finger (B-box type) family protein    | 63  | 42  | 66   | 65  | 73   | 71  | 57  | 70   | 0.82     | 0.176117 | 39  | 52  | 54  | 45   | 47  | 43  | 59  | 49  | 48  | 48   | 1.00     | 0.995144 | 45   | 1.08     | 0.507983 |
| 245603_at | Ak4g15260 | glucosyltransferase                       | UDP-glucuronosylUDP-glucosyl transfe       | 17  | 20  | 32   | 28  | 29   | 36  | 23  | 31   | 0.75     | 0.201452 | 17  | 15  | 20  | 20   | 18  | 21  | 22  | 19  | 17  | 20   | 0.86     | 0.094075 | 19   | 0.88     | 0.238660 |
| 245604_at | Ak4g15270 | UDP-glucose glucosyltransferase like p    | glucosyltransferase-related                | 56  | 75  | 94   | 67  | 68   | 69  | 75  | 68   | 1.10     | 0.565095 | 65  | 67  | 73  | 61   | 55  | 60  | 68  | 57  | 68  | 60   | 1.13     | 0.056670 | 59   | 1.16     | 0.031451 |
| 245605_at | Ak4g15280 | UDP-glucose glucosyltransferase           | UDP-glucuronosylUDP-glucosyl transfe       | 62  | 80  | 119  | 105 | 107  | 94  | 87  | 99   | 0.88     | 0.518015 | 48  | 54  | 101 | 69   | 49  | 47  | 62  | 57  | 68  | 55   | 1.24     | 0.456903 | 52   | 1.31     | 0.402631 |
| 245606_at | Ak4g15290 | cellulose synthase like protein           | cellulose synthase family protein          | 39  | 47  | 63   | 62  | 57   | 59  | 50  | 59   | 0.84     | 0.258105 | 28  | 29  | 35  | 36   | 27  | 29  | 45  | 36  | 31  | 35   | 0.88     | 0.140586 | 31   | 1.00     | 0.969547 |
| 245607_at | Ak4g15300 | cytochrome P450 like protein              | cytochrome P450 family protein             | 18  | 20  | 27   | 25  | 27   | 23  | 22  | 25   | 0.87     | 0.349772 | 17  | 12  | 16  | 17   | 15  | 13  | 15  | 13  | 15  | 15   | 0.98     | 0.850818 | 15   | 1.00     | 0.999508 |
| 245608_at | Ak4g15310 | cytochrome P450 like protein              | cytochrome P450-related                    | 23  | 28  | 26   | 26  | 29   | 25  | 26  | 27   | 0.97     | 0.666932 | 24  | 24  | 29  | 20   | 21  | 20  | 32  | 23  | 26  | 23   | 1.11     | 0.437618 | 20   | 1.26     | 0.026960 |
| 245609_at | Ak4g15320 | cellulose synthase like protein           | cellulose synthase family protein          | 19  | 22  | 19   | 20  | 20   | 18  | 20  | 19   | 1.05     | 0.527756 | 17  | 17  | 15  | 12   | 14  | 15  | 16  | 12  | 14  | 16   | 1.16     | 0.081380 | 13   | 1.19     | 0.052768 |
| 245610_at | Ak4g15330 | cytochrome P450 like protein              | cytochrome P450 family protein             | 19  | 20  | 26   | 26  | 28   | 22  | 27  | 0.83 | 0.202426 | 12       | 13  | 22  | 16  | 16   | 16  | 16  | 16  | 16  | 16  | 19   | 0.98     | 0.880456 | 16   | 1.01     | 0.653354 |
| 245611_at | Ak4g15350 | cytochrome P450 like protein              | cytochrome P450 family protein             | 21  | 18  | 22   | 25  | 25   | 23  | 20  | 24   | 0.82     | 0.048576 | 11  | 9   | 19  | 11   | 9   | 9   | 11  | 13  | 10  | 12   | 1.25     | 0.321977 | 10   | 1.24     | 0.491058 |
| 245612_at | Ak4g15360 | cytochrome P450 like protein              | cytochrome P450 family protein             | 18  | 15  | 16   | 12  | 14   | 12  | 17  | 13   | 1.29     | 0.028173 | 10  | 13  | 13  | 12   | 14  | 12  | 15  | 11  | 12  | 13   | 0.94     | 0.558648 | 13   | 0.96     | 0.695949 |
| 245613_at | Ak4g15370 | lipoel synthase like protein              | pentacyclic lipoene synthase, putative     | 21  | 26  | 23   | 24  | 24   | 23  | 23  | 24   | 0.97     | 0.607748 | 16  | 17  | 19  | 22   | 20  | 18  | 20  | 18  | 20  | 20   | 0.89     | 0.184900 | 21   | 0.83     | 0.016763 |
| 245614_at | Ak4g15380 | cytochrome P450 like protein              | cytochrome P450 family protein             | 19  | 21  | 24   | 26  | 19   | 21  | 24  | 26   | 0.88     | 0.246114 | 15  | 17  | 20  | 15   | 17  | 16  | 17  | 10  | 17  | 16   | 1.01     | 0.893655 | 15   | 1.06     | 0.502386 |
| 245615_at | Ak4g15390 | HSR201 like protein                       | transferase family protein                 | 30  | 37  | 39   | 41  | 45   | 48  | 35  | 45   | 0.79     | 0.048612 | 30  | 36  | 38  | 35   | 22  | 27  | 41  | 33  | 35  | 32   | 1.10     | 0.530873 | 28   | 1.24     | 0.214051 |
|           |           |                                           |                                            |     |     |      |     |      |     |     |      |          |          |     |     |     |      |     |     |     |     |     |      |          |          |      |          |          |

|             |           |                                             |                                            |     |     |     |     |     |     |     |      |          |          |     |     |     |     |     |     |     |     |          |     |      |          |          |      |          |          |
|-------------|-----------|---------------------------------------------|--------------------------------------------|-----|-----|-----|-----|-----|-----|-----|------|----------|----------|-----|-----|-----|-----|-----|-----|-----|-----|----------|-----|------|----------|----------|------|----------|----------|
| 245480_at   | At4g16150 | transcription factor like protein           | calmodulin-binding protein                 | 120 | 159 | 202 | 182 | 212 | 168 | 160 | 187  | 0.86     | 0.376616 | 141 | 115 | 124 | 162 | 144 | 123 | 172 | 154 | 127      | 151 | 0.84 | 0.101670 | 143      | 0.89 | 0.290308 |          |
| 245481_at   | At4g16170 | hypothetical protein                        | expressed protein                          | 296 | 337 | 371 | 409 | 454 | 352 | 335 | 405  | 0.83     | 0.127241 | 284 | 228 | 318 | 358 | 320 | 271 | 297 | 304 | 277      | 310 | 0.89 | 0.266757 | 316      | 0.88 | 0.337921 |          |
| 245482_at   | At4g16180 | hypothetical protein                        | expressed protein                          | 95  | 113 | 99  | 170 | 172 | 114 | 102 | 152  | 0.87     | 0.066550 | 40  | 37  | 38  | 44  | 38  | 46  | 52  | 41  | 38       | 44  | 0.87 | 0.126136 | 43       | 0.90 | 0.173556 |          |
| 245483_at   | At4g16190 | hypothetical protein contains similarity to | cysteine dioxygenase, putative             | 189 | 415 | 199 | 386 | 385 | 353 | 287 | 123  | 0.86     | 0.143552 | 375 | 51  | 33  | 436 | 514 | 453 | 436 | 592 | 458      | 592 | 0.91 | 0.143552 | 469      | 0.91 | 0.341761 |          |
| 245484_at   | At4g16210 | enoyl-CoA hydratase like protein            | enoyl-CoA hydratase/isomerase family c     | 207 | 249 | 293 | 352 | 380 | 314 | 249 | 349  | 0.71     | 0.034071 | 280 | 317 | 307 | 491 | 306 | 370 | 319 | 307 | 301      | 375 | 0.80 | 0.147332 | 417      | 0.72 | 0.041668 |          |
| 245485_at   | At4g16230 | proline-rich, APG like protein              | GD5L-motif lipase/hydrolase family prot    | 19  | 25  | 23  | 21  | 25  | 28  | 22  | 25   | 0.90     | 0.413467 | 16  | 18  | 20  | 23  | 17  | 16  | 25  | 20  | 18       | 20  | 0.89 | 0.367605 | 19       | 0.96 | 0.745345 |          |
| 245486_x_at | At4g16240 | glycine-rich protein homolog                | hypothetical protein                       | 257 | 384 | 437 | 328 | 425 | 342 | 359 | 365  | 0.99     | 0.936451 | 197 | 194 | 250 | 171 | 168 | 156 | 224 | 208 | 214      | 185 | 1.15 | 0.237204 | 165      | 1.30 | 0.058907 |          |
| 245487_at   | At4g16250 | phycocyanobromin D (PHYD)                   | phycocyanobromin D (PHYD)                  | 115 | 193 | 193 | 193 | 210 | 167 | 143 | 178  | 0.90     | 0.139423 | 217 | 167 | 143 | 134 | 134 | 134 | 134 | 134 | 134      | 95  | 1.01 | 0.395420 | 123      | 0.88 | 0.394084 |          |
| 245488_at   | At4g16270 | peroxidase like protein                     | peroxidase 40 (PER40) (P40)                | 24  | 23  | 30  | 32  | 30  | 31  | 26  | 31   | 0.83     | 0.083360 | 21  | 25  | 22  | 22  | 18  | 19  | 20  | 20  | 22       | 20  | 1.13 | 0.089688 | 20       | 1.13 | 0.220943 |          |
| 245489_at   | At4g16280 | FCA gamma protein                           | flowering time control protein / FCA oam   | 115 | 158 | 157 | 161 | 189 | 125 | 143 | 158  | 0.91     | 0.562203 | 125 | 119 | 120 | 173 | 136 | 135 | 157 | 144 | 121      | 149 | 0.81 | 0.026405 | 148      | 0.82 | 0.098419 |          |
| 245490_at   | At4g16310 | hypothetical protein                        | amine oxidase family / SWIRM d             | 65  | 64  | 59  | 70  | 79  | 67  | 57  | 72   | 0.80     | 0.068702 | 36  | 33  | 38  | 33  | 37  | 32  | 40  | 35  | 36       | 35  | 1.01 | 0.919590 | 34       | 1.05 | 0.462629 |          |
| 245491_at   | At4g16320 | hypothetical protein                        | expressed protein                          | 100 | 149 | 139 | 160 | 175 | 128 | 120 | 142  | 0.86     | 0.26945  | 104 | 94  | 114 | 141 | 123 | 103 | 101 | 104 | 104      | 115 | 0.91 | 0.373822 | 122      | 0.85 | 0.211362 |          |
| 245492_at   | At4g16340 | putative protein                            | adaptor protein SPK1c (SPK1)               | 275 | 355 | 318 | 410 | 399 | 339 | 316 | 383  | 0.83     | 0.106302 | 243 | 230 | 306 | 404 | 304 | 250 | 354 | 371 | 260      | 337 | 0.77 | 0.102628 | 319      | 0.81 | 0.308449 |          |
| 245493_at   | At4g16380 | hypothetical protein                        | hypothetical protein                       | 61  | 86  | 67  | 84  | 67  | 73  | 71  | 75   | 0.95     | 0.700321 | 37  | 58  | 61  | 71  | 55  | 49  | 71  | 60  | 52       | 61  | 0.85 | 0.297471 | 58       | 0.90 | 0.573367 |          |
| 245494_at   | At4g16390 | salt-inducible protein homolog              | expressed protein (H) chloroplastic RNA-i  | 182 | 248 | 201 | 234 | 246 | 194 | 210 | 225  | 0.93     | 0.586128 | 159 | 151 | 174 | 226 | 188 | 169 | 207 | 192 | 161      | 196 | 0.82 | 0.041748 | 194      | 0.83 | 0.139292 |          |
| 245495_at   | At4g16400 | hypothetical protein                        | expressed protein                          | 28  | 31  | 43  | 44  | 45  | 41  | 34  | 43   | 0.79     | 0.115603 | 35  | 38  | 46  | 54  | 48  | 49  | 45  | 43  | 40       | 48  | 0.83 | 0.057273 | 50       | 0.79 | 0.048012 |          |
| 245496_at   | At4g16440 | hypothetical protein                        | glucosyltransferase family protein         | 100 | 149 | 139 | 160 | 175 | 128 | 120 | 142  | 0.86     | 0.26945  | 104 | 94  | 114 | 141 | 123 | 103 | 101 | 104 | 104      | 115 | 0.91 | 0.373822 | 122      | 0.85 | 0.211362 |          |
| 245497_at   | At4g16460 | hypothetical protein                        | hypothetical protein                       | 26  | 36  | 40  | 20  | 21  | 20  | 34  | 20   | 1.67     | 0.027767 | 39  | 45  | 40  | 16  | 19  | 16  | 19  | 16  | 41       | 17  | 2.42 | 0.000010 | 17       | 2.45 | 0.000456 |          |
| 245498_at   | At4g16470 | hypothetical protein                        | pentatricopeptide (PPR) repeat-contains    | 113 | 152 | 186 | 180 | 167 | 158 | 150 | 169  | 0.89     | 0.450984 | 93  | 98  | 105 | 138 | 117 | 99  | 125 | 100 | 99       | 116 | 0.85 | 0.138892 | 118      | 0.83 | 0.071190 |          |
| 245499_at   | At4g16480 | membrane transporter like protein           | sugar transporter family protein           | 351 | 487 | 592 | 283 | 336 | 226 | 477 | 282  | 1.69     | 0.063861 | 573 | 604 | 509 | 530 | 448 | 490 | 692 | 671 | 562      | 558 | 1.01 | 0.957320 | 476      | 1.18 | 0.091033 |          |
| 245500_at   | At4g16500 | cellulose synthase like protein             | glucosyltransferase-related                | 29  | 38  | 40  | 48  | 49  | 41  | 36  | 46   | 0.78     | 0.083359 | 29  | 25  | 32  | 34  | 36  | 35  | 33  | 36  | 28       | 35  | 0.82 | 0.012285 | 35       | 0.81 | 0.044116 |          |
| 245501_at   | At4g16600 | glucosyltransferase like protein            | olivocerin glucosyltransferase (olivocoe   | 107 | 106 | 134 | 101 | 110 | 105 | 116 | 105  | 1.10     | 0.323120 | 82  | 80  | 88  | 82  | 75  | 65  | 82  | 77  | 83       | 76  | 1.10 | 0.165785 | 74       | 1.13 | 0.163120 |          |
| 245502_at   | At4g16610 | hypothetical protein                        | zinc finger (C2H2 type) family protein     | 265 | 266 | 301 | 264 | 357 | 270 | 277 | 297  | 0.93     | 0.570317 | 328 | 376 | 323 | 420 | 315 | 343 | 343 | 325 | 346      | 349 | 0.99 | 0.910739 | 359      | 0.96 | 0.723519 |          |
| 245503_at   | At4g16620 | membrane protein homolog                    | integral membrane family protein / nodul   | 41  | 37  | 54  | 88  | 100 | 82  | 44  | 90   | 0.49     | 0.003130 | 40  | 50  | 56  | 68  | 73  | 69  | 82  | 66  | 50       | 76  | 0.66 | 0.006205 | 67       | 0.65 | 0.016228 |          |
| 245504_at   | At4g16630 | RNA helicase like protein                   | DEAD/DEAH box helicase, putative (RH       | 102 | 131 | 126 | 131 | 170 | 123 | 119 | 142  | 0.84     | 0.260983 | 73  | 78  | 87  | 105 | 88  | 73  | 90  | 86  | 80       | 88  | 0.90 | 0.285769 | 89       | 0.90 | 0.426475 |          |
| 245505_at   | At4g16650 | growth regulator like protein               | expressed protein                          | 116 | 148 | 166 | 186 | 195 | 148 | 137 | 176  | 0.78     | 0.090553 | 82  | 64  | 87  | 121 | 104 | 88  | 105 | 74  | 0.000252 | 104 | 0.74 | 0.008286 | 104      | 0.74 | 0.008286 |          |
| 245506_at   | At4g16670 | hypothetical protein                        | expressed protein                          | 49  | 66  | 74  | 92  | 104 | 90  | 63  | 95   | 0.66     | 0.019988 | 69  | 80  | 71  | 100 | 95  | 77  | 101 | 102 | 73       | 95  | 0.77 | 0.016710 | 91       | 0.81 | 0.085376 |          |
| 245507_at   | At4g16680 | RNA helicase                                | RNA helicase, putative                     | 17  | 18  | 21  | 17  | 23  | 17  | 19  | 19   | 0.99     | 0.970135 | 15  | 16  | 21  | 17  | 16  | 16  | 14  | 13  | 17       | 15  | 1.14 | 0.228708 | 16       | 1.07 | 0.573221 |          |
| 245508_at   | At4g16700 | decarboxylase like protein                  | phosphatidylserine decarboxylase           | 58  | 70  | 68  | 76  | 79  | 69  | 66  | 75   | 0.88     | 0.128629 | 63  | 64  | 69  | 82  | 63  | 68  | 70  | 66  | 65       | 70  | 0.93 | 0.333333 | 71       | 0.92 | 0.384255 |          |
| 245509_at   | At4g16710 | hypothetical protein                        | glycosyltransferase family protein 28      | 80  | 107 | 115 | 103 | 111 | 80  | 107 | 115  | 0.99     | 0.534941 | 98  | 106 | 101 | 117 | 109 | 117 | 108 | 107 | 112      | 102 | 1.02 | 0.028316 | 112      | 0.91 | 0.054451 |          |
| 245510_at   | At4g16730 | limonene cyclase like protein               | terpene synthase/cyclase family protein    | 13  | 17  | 20  | 14  | 16  | 21  | 17  | 17   | 0.99     | 0.956569 | 14  | 12  | 14  | 13  | 18  | 14  | 14  | 14  | 13       | 15  | 0.91 | 0.348703 | 15       | 0.89 | 0.380890 |          |
| 245511_at   | At4g16740 | limonene cyclase like protein               | terpene synthase/cyclase family protein    | 36  | 27  | 53  | 46  | 45  | 42  | 39  | 44   | 0.88     | 0.527865 | 28  | 30  | 34  | 45  | 34  | 36  | 41  | 32  | 31       | 38  | 0.81 | 0.084467 | 39       | 0.80 | 0.115841 |          |
| 245512_at   | At4g16750 | apetal2 domain TINY like protein            | apetal2 domain TINY like protein           | 23  | 30  | 30  | 29  | 28  | 29  | 28  | 29   | 0.96     | 0.576930 | 19  | 26  | 33  | 22  | 23  | 23  | 26  | 23  | 26       | 24  | 1.10 | 0.470848 | 23       | 1.14 | 0.490105 |          |
| 245513_at   | At4g16760 | enoyl-CoA hydratase, putative               | enoyl-CoA hydratase, putative              | 316 | 428 | 474 | 563 | 447 | 403 | 527 | 0.77 | 0.129405 | 428      | 469 | 457 | 693 | 549 | 500 | 461 | 593 | 459 | 451      | 533 | 0.86 | 0.537874 | 591      | 0.78 | 0.094191 |          |
| 245514_at   | At4g16820 | triacylglycerol lipase like protein         | lipase class 3 family protein              | 20  | 20  | 25  | 26  | 27  | 25  | 22  | 26   | 0.84     | 0.069272 | 18  | 15  | 22  | 21  | 17  | 16  | 21  | 17  | 18       | 18  | 1.00 | 0.977330 | 18       | 1.02 | 0.913793 |          |
| 245515_at   | At4g16880 | disease resistance RP25 like protein        | disease resistance protein (TIR-NBS-LR     | 9   | 6   | 9   | 4   | 10  | 10  | 8   | 8    | 1.00     | 0.990999 | 5   | 8   | 7   | 4   | 5   | 7   | 6   | 8   | 7        | 7   | 6    | 1.08     | 0.638554 | 6    | 1.22     | 0.341391 |
| 245516_at   | At4g16870 | retrotransposon like protein                | copiae-like retrotransposon family         | 26  | 29  | 38  | 37  | 40  | 37  | 31  | 38   | 0.82     | 0.127405 | 27  | 24  | 34  | 28  | 29  | 28  | 29  | 28  | 28       | 28  | 0.98 | 0.805764 | 28       | 0.99 | 0.928776 |          |
| 245517_at   | At4g16890 | disease resistance RP25 like protein (R     | disease resistance protein-related         | 21  | 21  | 27  | 22  | 17  | 24  | 13  | 23   | 0.85     | 0.658075 | 16  | 15  | 21  | 19  | 16  | 17  | 19  | 17  | 19       | 17  | 0.98 | 0.919156 | 18       | 0.97 | 0.808907 |          |
| 245518_at   | At4g16890 | disease resistance RP25 like protein (R     | disease resistance protein (TIR-NBS-LR     | 33  | 47  | 42  | 47  | 52  | 41  | 41  | 46   | 0.87     | 0.297673 | 32  | 26  | 32  | 27  | 32  | 30  | 37  | 34  | 30       | 32  | 0.93 | 0.457474 | 30       | 1.01 | 0.914601 |          |
| 245519_at   | At4g16910 | retrotransposon like protein                | cnvsi-like retrotransposon family (H) over | 17  | 19  | 30  | 24  | 27  | 23  | 22  | 25   | 0.88     | 0.521944 | 18  | 13  | 19  | 22  | 15  | 18  | 19  | 19  | 17       | 18  | 0.91 | 0.450541 | 18       | 0.92 | 0.632611 |          |
| 245520_at   | At4g16900 | disease resistance RP25 like protein        | disease resistance protein (TIR-NBS-LR     | 15  | 18  | 17  | 20  | 22  | 19  | 17  | 20   | 0.81     | 0.054752 | 11  | 14  | 17  | 20  | 13  | 14  | 19  | 14  | 14       | 16  | 0.88 | 0.389333 | 16       | 0.89 | 0.562538 |          |
| 245521_at   | At4g16920 | disease resistance RP25 like protein        | disease resistance protein (TIR-NBS-LR     | 10  | 13  | 22  | 14  | 26  | 10  | 13  | 12   | 0.92     | 0.724448 | 10  | 14  | 10  | 11  | 11  | 12  | 10  | 11  | 12       | 11  | 1.02 | 0.879353 | 10       | 1.09 | 0.689625 |          |
| 245522_at   | At4g16930 | disease resistance RP25 like protein (R     | disease resistance protein (TIR-NBS-LR     | 12  | 11  | 10  | 14  | 17  | 14  | 14  | 15   | 0.93     | 0.703842 | 11  | 9   | 12  | 10  | 12  | 9   | 12  | 10  | 12       | 9   | 0.89 | 0.558040 | 12       | 0.92 | 0.359323 |          |
| 245523_at   | At4g16950 | disease resistance RP25 like protein        | disease resistance protein (TIR-NBS-LR     | 40  | 43  | 52  | 65  | 75  | 51  | 45  | 64   | 0.71     | 0.071159 | 37  | 36  | 44  | 44  | 40  | 41  | 55  | 46  | 39       | 45  | 0.86 | 0.172517 | 42       | 0.93 | 0.386284 |          |
| 245524_at   | At4g16960 | disease resistance RP25 like protein        | disease resistance protein (TIR-NBS-LR     | 11  | 17  | 18  | 19  | 20  | 15  | 20  | 15   | 0.77     | 0.005945 | 11  | 13  | 15  | 17  | 11  | 15  | 18  | 13  | 13       | 15  | 0.86 | 0.336852 | 14       | 0.89 | 0.514620 |          |
| 245525_x_at | At4g16960 | kinase like protein                         | protein kinase family protein              | 99  | 123 | 126 | 136 | 149 | 129 | 116 | 138  | 0.84     | 0.103133 | 89  | 86  | 94  | 112 | 102 | 78  | 111 | 91  | 90       | 99  | 0.91 | 0.327099 | 97       | 0.92 | 0.498080 |          |
| 245526_at   | At4g16980 | hypothetical protein                        | hypothetical protein                       | 98  | 117 | 137 | 173 | 148 | 117 | 138 | 158  | 0.88     | 0.506673 | 45  | 47  | 63  | 48  | 60  | 45  | 76  | 65  | 60       | 67  | 0.85 | 0.438193 | 68       | 0.99 | 0.976838 |          |
| 245527_at   | At4g16990 | disease resistance RP25 like protein (R     | disease resistance protein (TIR-NBS-LR     | 12  | 13  | 12  | 13  | 10  | 13  | 12  | 12   |          |          |     |     |     |     |     |     |     |     |          |     |      |          |          |      |          |          |

|           |           |                                                                                        |      |      |      |      |      |      |      |      |          |          |      |      |      |      |      |      |      |      |      |      |      |          |          |      |          |          |
|-----------|-----------|----------------------------------------------------------------------------------------|------|------|------|------|------|------|------|------|----------|----------|------|------|------|------|------|------|------|------|------|------|------|----------|----------|------|----------|----------|
| 245386_at | A04g14010 | hypothetical protein; supported by full-l rapid alkalization factor (RALF) family      | 34   | 62   | 42   | 76   | 83   | 67   | 46   | 76   | 0.61     | 0.030598 | 50   | 46   | 51   | 105  | 85   | 80   | 75   | 64   | 49   | 82   | 0.60 | 0.010392 | 90       | 0.54 | 0.005670 |          |
| 245387_at | A04g17520 | nuclear RNA binding protein A-like prot nuclear RNA-binding protein, putative          | 681  | 830  | 713  | 808  | 873  | 755  | 741  | 812  | 0.91     | 0.280850 | 780  | 708  | 877  | 1053 | 831  | 778  | 835  | 847  | 788  | 869  | 0.91 | 0.310739 | 887      | 0.89 | 0.366285 |          |
| 245388_at | A04g16410 | hypothetical protein; supported by full-l expressed protein                            | 210  | 348  | 279  | 287  | 262  | 221  | 279  | 257  | 1.09     | 0.642712 | 419  | 503  | 462  | 591  | 394  | 438  | 510  | 469  | 461  | 480  | 0.96 | 0.704634 | 474      | 0.97 | 0.849568 |          |
| 245389_at | A04g17300 | putative protein; supported by full-length $\alpha$ -glucosyl transferase family prot  | 4625 | 4205 | 4027 | 457  | 454  | 745  | 444  | 501  | 0.62     | 0.179172 | 745  | 742  | 735  | 869  | 795  | 792  | 754  | 774  | 774  | 795  | 1.00 | 0.981733 | 786      | 0.99 | 0.449602 |          |
| 245391_at | A04g17650 | putative protein; supported by full-length aromatic-rich glycoprotein                  | 139  | 172  | 209  | 225  | 236  | 213  | 174  | 225  | 0.77     | 0.073352 | 175  | 189  | 218  | 286  | 232  | 213  | 199  | 207  | 194  | 227  | 0.85 | 0.194164 | 244      | 0.80 | 0.118632 |          |
| 245391_at | A04g16520 | synthiosis-related like protein; supports acetate group B (APGB)                       | 1239 | 1911 | 2204 | 1435 | 1952 | 1272 | 1785 | 1553 | 1.15     | 0.545850 | 1729 | 1756 | 1593 | 1948 | 1829 | 1802 | 1957 | 2055 | 1693 | 1918 | 0.88 | 0.019880 | 1860     | 0.91 | 0.068343 |          |
| 245392_at | A04g15680 | glutaredoxin; supported by full-length $\alpha$ glutaredoxin family protein            | 54   | 67   | 77   | 80   | 81   | 72   | 66   | 78   | 0.85     | 0.188534 | 69   | 65   | 79   | 96   | 83   | 97   | 89   | 71   | 92   | 97   | 0.77 | 0.003759 | 91       | 0.78 | 0.024615 |          |
| 245393_at | A04g16260 | 1,3-glucanase like protein; supports $\alpha$ -glucosyl transferase family 17 protein  | 364  | 394  | 384  | 49   | 46   | 39   | 46   | 38   | 0.86     | 0.179172 | 46   | 39   | 47   | 32   | 34   | 39   | 35   | 32   | 34   | 39   | 0.86 | 0.270044 | 32       | 0.80 | 0.049144 |          |
| 245394_at | A04g16450 | hypothetical protein; supported by full-l expressed protein                            | 1043 | 1355 | 1331 | 1554 | 1653 | 1504 | 1243 | 1570 | 0.79     | 0.040169 | 1329 | 1368 | 1545 | 1863 | 1537 | 1393 | 1388 | 1376 | 1414 | 1511 | 0.94 | 0.491005 | 1598     | 0.88 | 0.298972 |          |
| 245395_at | A04g17420 | hypothetical protein; supported by full-l expressed protein                            | 230  | 285  | 265  | 312  | 348  | 265  | 260  | 304  | 0.84     | 0.171401 | 249  | 265  | 277  | 402  | 319  | 271  | 317  | 278  | 264  | 318  | 0.83 | 0.138730 | 331      | 0.80 | 0.161460 |          |
| 245396_at | A04g14870 | hypothetical protein; supported by full-l expressed protein                            | 144  | 224  | 210  | 174  | 226  | 174  | 193  | 191  | 1.01     | 0.960501 | 203  | 256  | 250  | 283  | 264  | 233  | 297  | 299  | 237  | 275  | 0.86 | 0.107740 | 260      | 0.91 | 0.351700 |          |
| 245397_at | A04g14560 | auxin-responsive protein (AAR) support auxin-responsive protein / indoleacetic a       | 122  | 189  | 160  | 272  | 246  | 149  | 146  | 167  | 0.87     | 0.121218 | 57   | 46   | 67   | 774  | 82   | 78   | 79   | 74   | 70   | 56   | 0.79 | 0.72     | 0.015895 | 83   | 0.65     | 0.024368 |
| 245398_at | A04g14000 | hydroxyproline-rich glycoprotein homol hydroxyproline-rich glycoprotein family c       | 151  | 161  | 159  | 182  | 117  | 148  | 151  | 0.98 | 0.894063 | 112      | 102  | 103  | 106  | 132  | 116  | 140  | 135  | 106  | 106  | 137  | 0.77 | 0.025090 | 137      | 0.77 | 0.007321 |          |
| 245399_at | A04g17340 | membrane channel like protein; support major intrinsic protein / MIP family            | 58   | 70   | 87   | 78   | 86   | 79   | 72   | 81   | 0.88     | 0.339672 | 54   | 58   | 64   | 76   | 62   | 64   | 72   | 71   | 59   | 69   | 0.85 | 0.047642 | 67       | 0.88 | 0.183560 |          |
| 245400_at | A04g17040 | ATP-dependent Clp protease proteolip ATP-dependent Clp protease proteolipic            | 547  | 779  | 698  | 784  | 877  | 625  | 675  | 762  | 0.89     | 0.432790 | 756  | 852  | 766  | 1103 | 930  | 873  | 898  | 834  | 791  | 928  | 0.85 | 0.084010 | 969      | 0.82 | 0.078583 |          |
| 245401_at | A04g17670 | hypothetical protein; supported by full-l senseless-associated protein-related         | 213  | 223  | 204  | 442  | 448  | 355  | 213  | 415  | 0.51     | 0.002757 | 216  | 166  | 233  | 451  | 338  | 325  | 231  | 213  | 205  | 312  | 0.66 | 0.119424 | 371      | 0.55 | 0.020338 |          |
| 245402_at | A04g15420 | ribosomal protein; supported by full-len 60S ribosomal protein L15 (RPL15A)            | 3005 | 3545 | 3478 | 3725 | 3946 | 3616 | 3343 | 3729 | 0.90     | 0.141247 | 3155 | 3471 | 3391 | 4011 | 3439 | 3135 | 3367 | 3441 | 3306 | 3483 | 0.95 | 0.427754 | 3535     | 0.94 | 0.456146 |          |
| 245403_at | A04g15830 | hypothetical protein; supported by full-l expressed protein                            | 449  | 623  | 471  | 755  | 812  | 659  | 515  | 742  | 0.69     | 0.032999 | 506  | 511  | 537  | 822  | 607  | 549  | 512  | 493  | 518  | 597  | 0.87 | 0.362618 | 659      | 0.79 | 0.166105 |          |
| 245404_at | A04g15475 | F-box protein family, AtFBL4 contains F-box family protein (FBL4)                      | 203  | 310  | 288  | 317  | 353  | 289  | 267  | 320  | 0.83     | 0.232098 | 212  | 214  | 224  | 287  | 258  | 205  | 342  | 292  | 217  | 277  | 0.78 | 0.092086 | 250      | 0.87 | 0.241238 |          |
| 245405_at | A04g16640 | proteinase like protein; support fu matrix metalloproteinase, putative                 | 36   | 37   | 54   | 52   | 60   | 51   | 42   | 54   | 0.78     | 0.146808 | 32   | 30   | 32   | 45   | 34   | 38   | 31   | 38   | 31   | 37   | 0.83 | 0.098775 | 39       | 0.79 | 0.077798 |          |
| 245406_at | A04g17090 | putative beta-amylase; supported by fu beta-amylase (CB-TMY1) / 1,4-alpha-D-q          | 178  | 151  | 167  | 308  | 405  | 313  | 165  | 342  | 0.46     | 0.005561 | 97   | 120  | 83   | 84   | 62   | 53   | 106  | 106  | 106  | 106  | 137  | 0.77     | 0.025090 | 137  | 0.77     | 0.007321 |
| 245407_at | A04g14890 | ferredoxin; supported by full-length cDN ferredoxin family protein                     | 211  | 361  | 312  | 348  | 375  | 302  | 295  | 342  | 0.86     | 0.390676 | 283  | 323  | 340  | 436  | 340  | 341  | 341  | 357  | 315  | 363  | 0.87 | 0.134344 | 372      | 0.85 | 0.187491 |          |
| 245408_at | A04g17770 | trehalase-6-phosphate synthase like or aldolose transferase family 20 protein / t      | 330  | 360  | 369  | 602  | 632  | 491  | 353  | 574  | 0.61     | 0.007570 | 412  | 323  | 436  | 631  | 554  | 450  | 478  | 458  | 390  | 514  | 0.76 | 0.056045 | 545      | 0.72 | 0.068785 |          |
| 245409_at | A04g16690 | cyanohydrin lyase like protein; supports esterase/lipase/thioesterase family prote     | 39   | 115  | 71   | 50   | 38   | 33   | 75   | 40   | 1.88     | 0.193063 | 102  | 127  | 108  | 52   | 47   | 39   | 66   | 60   | 112  | 53   | 2.12 | 0.000368 | 48       | 2.42 | 0.001376 |          |
| 245410_at | A04g16830 | nuclear antigen homolog; supported by nuclear RNA-binding protein (RGOA)               | 879  | 1204 | 1346 | 1276 | 1509 | 1195 | 1143 | 1327 | 0.86     | 0.333296 | 865  | 828  | 939  | 1251 | 1074 | 995  | 1157 | 1153 | 877  | 1126 | 0.78 | 0.007089 | 1106     | 0.79 | 0.049399 |          |
| 245411_at | A04g17640 | casein kinase II beta chain CK2B; succ casein kinase II beta chain, putative           | 464  | 631  | 596  | 736  | 687  | 622  | 570  | 682  | 0.84     | 0.114788 | 545  | 634  | 656  | 684  | 671  | 680  | 689  | 636  | 611  | 732  | 0.84 | 0.221563 | 778      | 0.79 | 0.197980 |          |
| 245412_at | A04g15490 | indole-3-acetate beta-glucosyltransferase UDP-glucuronosylUDP-glucosyl transfe         | 63   | 76   | 107  | 95   | 96   | 80   | 82   | 90   | 0.91     | 0.583984 | 79   | 75   | 86   | 83   | 72   | 65   | 87   | 86   | 80   | 81   | 0.99 | 0.939320 | 73       | 1.09 | 0.361443 |          |
| 245413_at | A04g16000 | hypothetical protein; supported by full-l expressed protein                            | 45   | 47   | 71   | 63   | 70   | 74   | 54   | 69   | 0.78     | 0.162463 | 38   | 38   | 48   | 48   | 45   | 41   | 42   | 45   | 41   | 42   | 0.92 | 0.292588 | 47       | 0.89 | 0.236388 |          |
| 245414_at | A04g17600 | L13 protein; supported by full-length cD i3 protein                                    | 459  | 439  | 410  | 538  | 544  | 425  | 376  | 502  | 0.75     | 0.114353 | 415  | 380  | 442  | 675  | 489  | 498  | 548  | 548  | 548  | 548  | 0.76 | 0.031102 | 554      | 0.75 | 0.091865 |          |
| 245415_at | A04g17320 | 60S ribosomal protein L15 homolog; su 60S ribosomal protein L15 (RPL15B)               | 3527 | 4292 | 4267 | 4052 | 3963 | 3865 | 3877 | 4052 | 0.87     | 0.671766 | 3907 | 3968 | 3968 | 4072 | 3968 | 3968 | 3968 | 3968 | 3968 | 3968 | 0.93 | 0.322219 | 4072     | 0.93 | 0.403710 |          |
| 245416_at | A04g13940 | adenosylhomocysteine; supported by adenosylhomocysteine / S-adenosyl-L                 | 2468 | 2828 | 3053 | 3389 | 3415 | 3170 | 2783 | 3325 | 0.84     | 0.044881 | 2464 | 2470 | 2723 | 3717 | 2939 | 2618 | 3305 | 3256 | 2552 | 3167 | 0.81 | 0.052053 | 3591     | 0.83 | 0.185458 |          |
| 245417_at | A04g17560 | putative protein; supported by full-length ribosomal protein L19 family protein        | 159  | 209  | 268  | 220  | 251  | 199  | 242  | 223  | 1.08     | 0.706694 | 213  | 307  | 235  | 323  | 231  | 260  | 245  | 235  | 252  | 259  | 0.97 | 0.823742 | 272      | 0.93 | 0.640389 |          |
| 245418_at | A04g15900 | PRL1 protein; supported by full-length c PP1-PP2A phosphatases pleiotropic req         | 270  | 376  | 334  | 460  | 472  | 381  | 327  | 438  | 0.75     | 0.057404 | 265  | 291  | 278  | 453  | 376  | 313  | 416  | 381  | 278  | 388  | 0.72 | 0.013235 | 381      | 0.73 | 0.087902 |          |
| 245419_at | A04g14400 | carbamate racemase like protein; support anoxi-CoA hydratase/isomerase family c        | 287  | 379  | 409  | 361  | 374  | 323  | 379  | 368  | 1.01     | 0.953222 | 452  | 613  | 488  | 562  | 440  | 482  | 482  | 517  | 418  | 517  | 1.08 | 0.451114 | 472      | 1.10 | 0.511199 |          |
| 245420_at | A04g16330 | narinnenin 3-dioxygenase like protein; oxidoreductase, ZOG-FerII oxovanone I           | 296  | 420  | 467  | 395  | 432  | 355  | 394  | 394  | 1.00     | 0.996505 | 419  | 528  | 484  | 594  | 449  | 457  | 503  | 482  | 477  | 497  | 0.96 | 0.648321 | 500      | 0.95 | 0.706006 |          |
| 245421_at | A04g17790 | hypothetical protein; supported by full-l expressed protein                            | 449  | 665  | 684  | 637  | 793  | 554  | 599  | 661  | 0.91     | 0.579201 | 683  | 734  | 635  | 932  | 807  | 788  | 804  | 769  | 684  | 820  | 0.83 | 0.020535 | 842      | 0.81 | 0.040851 |          |
| 245422_at | A04g17460 | homeobox-leucine zipper protein HA11 homeobox-leucine zipper protein 1 (HA1            | 354  | 436  | 467  | 632  | 752  | 602  | 419  | 662  | 0.63     | 0.12853  | 780  | 863  | 757  | 1261 | 1269 | 887  | 1214 | 1193 | 800  | 1165 | 0.69 | 0.096922 | 1139     | 0.70 | 0.059492 |          |
| 245423_at | A04g15120 | hypothetical protein; supported by full-l homeobox-leucine zipper protein 1            | 27   | 32   | 42   | 28   | 29   | 32   | 32   | 30   | 1.08     | 0.659961 | 25   | 36   | 31   | 30   | 27   | 30   | 29   | 29   | 29   | 29   | 0.91 | 0.563288 | 29       | 0.92 | 0.591681 |          |
| 245424_at | A04g15790 | hypothetical protein; supported by full-l expressed protein                            | 419  | 474  | 489  | 627  | 620  | 534  | 461  | 594  | 0.78     | 0.022412 | 499  | 482  | 575  | 789  | 629  | 548  | 576  | 558  | 519  | 620  | 0.84 | 0.159224 | 655      | 0.79 | 0.149013 |          |
| 245425_at | A04g17720 | hypothetical protein; supported by full-l RNA recognition motif (RRM)-containin        | 138  | 171  | 156  | 202  | 223  | 159  | 155  | 195  | 0.80     | 0.134718 | 147  | 143  | 147  | 229  | 186  | 166  | 172  | 171  | 146  | 185  | 0.79 | 0.040873 | 193      | 0.75 | 0.062111 |          |
| 245426_at | A04g14965 | Expressed protein; supported by full-l eukaryotic 5S domain-containing protei          | 192  | 284  | 290  | 339  | 376  | 285  | 255  | 333  | 0.77     | 0.131730 | 249  | 283  | 265  | 472  | 344  | 348  | 325  | 311  | 266  | 360  | 0.74 | 0.052076 | 388      | 0.68 | 0.046670 |          |
| 245427_at | A04g16205 | Expressed protein; supported by full-l DNA-directed RNA polymerase II, puta            | 189  | 249  | 209  | 243  | 280  | 225  | 215  | 250  | 0.86     | 0.218558 | 215  | 214  | 241  | 352  | 263  | 242  | 246  | 234  | 224  | 267  | 0.84 | 0.190044 | 285      | 0.78 | 0.146193 |          |
| 245428_at | A04g15510 | hypothetical protein; supported by full-l photoreceptor II reaction center P680-far    | 47   | 48   | 48   | 54   | 58   | 42   | 40   | 48   | 0.94     | 0.687792 | 51   | 52   | 54   | 51   | 52   | 54   | 51   | 52   | 54   | 51   | 0.95 | 0.889    | 51       | 0.95 | 0.019649 |          |
| 245429_at | A04g15975 | Expressed protein; supported by full-l zinc finger (C3HC4-type RING finger) fa         | 34   | 36   | 50   | 45   | 48   | 49   | 47   | 47   | 0.85     | 0.244774 | 25   | 24   | 32   | 24   | 22   | 28   | 28   | 27   | 25   | 108  | 0.48 | 0.493213 | 23       | 1.17 | 0.241059 |          |
| 245430_at | A04g16840 | Expressed protein; supported by full-l expressed protein                               | 33   | 44   | 45   | 49   | 53   | 45   | 41   | 49   | 0.83     | 0.129453 | 43   | 52   | 51   | 69   | 47   | 44   | 57   | 57   | 48   | 55   | 0.88 | 0.339085 | 54       | 0.90 | 0.574413 |          |
| 245431_at | A04g15750 | hypothetical protein; supported by full-l invertase/lectin methyltransferase inhibitor | 138  | 156  | 306  | 88   | 80   | 61   | 200  | 63   | 1.18     | 0.067544 | 1280 | 1394 | 1460 | 539  | 427  | 335  | 453  | 444  | 1378 | 440  | 3.14 | 0.000004 | 534      | 3.18 | 0        |          |

|             |           |                                                                                    |      |      |      |      |        |      |      |      |          |          |      |      |      |      |      |      |      |      |          |      |          |          |      |          |          |
|-------------|-----------|------------------------------------------------------------------------------------|------|------|------|------|--------|------|------|------|----------|----------|------|------|------|------|------|------|------|------|----------|------|----------|----------|------|----------|----------|
| 245290_at   | A1g16490  | hypothesized protein; supported by cDN A armdilobeta-catenin repeat family prot    | 73   | 92   | 104  | 105  | 124    | 91   | 90   | 107  | 0.84     | 0.263585 | 81   | 102  | 93   | 121  | 87   | 85   | 108  | 95   | 92       | 99   | 0.93     | 0.493596 | 88   | 0.94     | 0.679322 |
| 245291_at   | A1g16155  | Expressed protein; supported by cDNV dihydrofolamide dehydrogenase 2. plat         | 213  | 274  | 226  | 291  | 333    | 243  | 238  | 289  | 0.82     | 0.183431 | 253  | 229  | 260  | 372  | 330  | 274  | 301  | 287  | 247      | 313  | 0.79     | 0.033160 | 325  | 0.76     | 0.058642 |
| 245292_at   | A1g15093  | Expressed protein; supported by cDNV catalytic Li6b subunit of aromatic nino-oc    | 129  | 164  | 196  | 262  | 287    | 248  | 166  | 266  | 0.82     | 0.008148 | 148  | 168  | 182  | 329  | 122  | 188  | 186  | 166  | 236      | 0.70 | 0.096492 | 269      | 0.62 | 0.032494 |          |
| 245293_at   | A1g16069  | hypothesized protein; supported by cDNA: heat shock protein 70, putative / HSP70   | 137  | 189  | 184  | 438  | 445    | 399  | 439  | 0.91 | 0.000000 | 278      | 233  | 269  | 372  | 296  | 208  | 298  | 208  | 298  | 208      | 298  | 0.93     | 0.23221  | 299  | 0.24     | 0.032494 |
| 245294_at   | A1g14340  | casein kinase I; supported by cDNV c casein kinase I (CKI1)                        | 129  | 189  | 174  | 210  | 229    | 174  | 164  | 204  | 0.80     | 0.172939 | 174  | 176  | 181  | 241  | 250  | 182  | 193  | 201  | 177      | 204  | 0.87     | 0.086189 | 209  | 0.85     | 0.135086 |
| 245295_at   | A1g16100  | hypothesized protein; supported by cDN expressed protein                           | 144  | 199  | 224  | 219  | 250    | 191  | 189  | 220  | 0.86     | 0.348078 | 196  | 213  | 216  | 291  | 222  | 223  | 207  | 210  | 208      | 231  | 0.90     | 0.337255 | 246  | 0.85     | 0.194256 |
| 245296_at   | A1g16370  | isP4 like protein; supported by cDNA: oligopeptide transporter OPT family prot     | 75   | 83   | 116  | 103  | 104    | 91   | 91   | 100  | 0.91     | 0.556652 | 93   | 82   | 84   | 102  | 82   | 73   | 96   | 95   | 90       | 90   | 1.00     | 0.999076 | 86   | 1.05     | 0.674451 |
| 245297_at   | A1g16150  | hypothesized protein; supported by cDNA: VhaKpR RNAseHase-related                  | 103  | 133  | 136  | 141  | 151    | 133  | 133  | 136  | 0.96     | 0.710365 | 116  | 159  | 167  | 197  | 144  | 132  | 135  | 142  | 139      | 139  | 1.00     | 0.567271 | 168  | 0.98     | 0.20423  |
| 245298_at   | A1g15010  | hypothesized protein; supported by cDN mitochondria substrate carrier family or    | 186  | 264  | 237  | 252  | 313    | 229  | 229  | 264  | 0.87     | 0.354066 | 217  | 217  | 224  | 311  | 262  | 248  | 241  | 226  | 220      | 257  | 0.85     | 0.101332 | 274  | 0.80     | 0.048884 |
| 245299_at   | A1g17530  | ras-related small GTP-binding protein F Ras-related GTP-binding protein, outath    | 549  | 614  | 676  | 794  | 751    | 667  | 613  | 737  | 0.83     | 0.073835 | 678  | 750  | 788  | 1205 | 853  | 748  | 804  | 806  | 739      | 883  | 0.84     | 0.244101 | 935  | 0.79     | 0.237173 |
| 245300_at   | A1g16350  | hypothesized protein; supported by cDN calcineurin B-like protein 6 (CBL6)         | 48   | 37   | 34   | 34   | 36     | 30   | 33   | 33   | 1.00     | 0.980167 | 31   | 25   | 29   | 28   | 25   | 31   | 31   | 33   | 29       | 30   | 0.96     | 0.652283 | 28   | 1.01     | 0.888265 |
| 245301_L3   | A1g17190  | farnesyl-vrochoshalase synthetase FFI farnesyl-vrochoshalase synthetase 2 (FI      | 218  | 305  | 575  | 691  | 745    | 617  | 499  | 684  | 0.73     | 0.134476 | 449  | 464  | 503  | 782  | 609  | 514  | 476  | 426  | 382      | 444  | 0.86     | 0.168044 | 635  | 0.74     | 0.116106 |
| 245302_at   | A1g17695  | Expressed protein; supported by cDN myb family transcription factor (KAN3)         | 89   | 123  | 107  | 118  | 128    | 109  | 106  | 119  | 0.90     | 0.334323 | 123  | 146  | 164  | 200  | 153  | 137  | 146  | 141  | 144      | 155  | 0.93     | 0.551683 | 163  | 0.88     | 0.442024 |
| 245275_at   | A1g15210  | beta-amylase; supported by cDNA: c beta-amylase (BMV1) / 1,4-alpha-D-qluc          | 57   | 33   | 269  | 1982 | 1672   | 1760 | 120  | 1805 | 0.07     | 0.000144 | 326  | 156  | 345  | 1562 | 1258 | 875  | 1044 | 1058 | 276      | 1159 | 0.24     | 0.001618 | 1232 | 0.22     | 0.010017 |
| 245276_at   | A1g16780  | beta-binding homeotic protein Atb-2; homeobox-leucine zipper protein 4 (HAT)       | 91   | 89   | 125  | 113  | 116    | 88   | 102  | 106  | 0.96     | 0.807113 | 86   | 75   | 90   | 109  | 90   | 88   | 98   | 92   | 83       | 95   | 0.88     | 0.095595 | 96   | 0.87     | 0.201138 |
| 245277_at   | A1g15550  | glucosyltransferase like protein; succo UDP-glucose:indole-3-acetate beta-D-ol     | 38   | 44   | 60   | 51   | 54     | 47   | 47   | 50   | 0.94     | 0.081614 | 35   | 36   | 43   | 41   | 29   | 36   | 45   | 51   | 38       | 40   | 0.94     | 0.682847 | 35   | 1.09     | 0.525230 |
| 245278_at   | A1g17730  | Expressed protein; supported by cDNA: serine/threonine protein phosphatase 2F      | 167  | 234  | 237  | 276  | 285    | 194  | 213  | 251  | 0.85     | 0.353000 | 144  | 135  | 149  | 235  | 155  | 167  | 189  | 178  | 193      | 182  | 0.78     | 0.091136 | 182  | 0.79     | 0.220692 |
| 245249_at   | A1g16760  | acyl-CoA oxidase like protein; supports acyl-CoA oxidase (ACX1)                    | 447  | 627  | 603  | 613  | 710    | 512  | 559  | 612  | 0.91     | 0.544736 | 347  | 300  | 382  | 418  | 380  | 265  | 457  | 435  | 343      | 391  | 0.88     | 0.359831 | 354  | 0.97     | 0.837276 |
| 245250_at   | A1g17490  | ethylene responsive element binding fa farnesyl-vrochoshalase synthetase 2F        | 62   | 49   | 72   | 54   | 74     | 55   | 61   | 61   | 1.00     | 0.975730 | 66   | 55   | 53   | 40   | 43   | 40   | 106  | 107  | 58       | 68   | 0.85     | 0.657217 | 42   | 1.37     | 0.018724 |
| 245251_at   | A1g17615  | ethylene responsive element binding fa farnesyl-vrochoshalase synthetase 2F        | 131  | 158  | 162  | 262  | 289    | 221  | 151  | 257  | 0.59     | 0.008526 | 134  | 114  | 129  | 208  | 171  | 158  | 172  | 148  | 127      | 171  | 0.74     | 0.019333 | 179  | 0.71     | 0.029495 |
| 245252_at   | A1g17500  | ethylene responsive element binding fa farnesyl-vrochoshalase synthetase 2F        | 153  | 146  | 163  | 159  | 182    | 159  | 154  | 167  | 0.92     | 0.218552 | 184  | 182  | 162  | 190  | 170  | 158  | 269  | 275  | 176      | 212  | 0.83     | 0.319418 | 173  | 1.02     | 0.796013 |
| 245253_at   | A1g15440  | hydroxoreactive lase (HPOL) like protein hydroxoreactive lyase (HPL1)              | 261  | 773  | 363  | 730  | 915    | 618  | 462  | 754  | 0.61     | 0.179860 | 336  | 292  | 382  | 756  | 793  | 784  | 887  | 924  | 337      | 829  | 0.41     | 0.000046 | 778  | 0.43     | 0.000099 |
| 245254_at   | A1g14680  | ATP-sulfurylase; supported by cDNA: sulfate adenylyltransferase 3 / ATP-sulfu      | 120  | 108  | 120  | 153  | 143    | 120  | 116  | 139  | 0.84     | 0.103333 | 98   | 95   | 111  | 152  | 136  | 110  | 129  | 129  | 101      | 131  | 0.77     | 0.021760 | 133  | 0.76     | 0.072263 |
| 245255_at   | A1g14110  | COPB protein; supported by cDNA: c COP9 signalosome subunit, putative / C          | 574  | 789  | 759  | 820  | 859    | 679  | 707  | 786  | 0.50     | 0.147170 | 747  | 792  | 770  | 1136 | 868  | 841  | 812  | 791  | 770      | 890  | 0.87     | 0.205993 | 948  | 0.81     | 0.133918 |
| 245256_at   | A1g15090  | Expressed protein; supported by cDNV far-1 impaired response protein (FAR1         | 91   | 123  | 118  | 133  | 145    | 107  | 111  | 128  | 0.86     | 0.296835 | 126  | 121  | 123  | 187  | 154  | 122  | 168  | 166  | 123      | 159  | 0.77     | 0.045647 | 154  | 0.80     | 0.172699 |
| 245257_at   | A1g14640  | calmodulin; supported by cDNA: c58 calmodulin-8 (CAMP8)                            | 15   | 14   | 19   | 18   | 24     | 19   | 16   | 20   | 0.81     | 0.204407 | 12   | 19   | 14   | 25   | 20   | 14   | 17   | 17   | 15       | 19   | 0.81     | 0.246319 | 20   | 0.77     | 0.285343 |
| 245258_at   | A1g15340  | lucifer synthase like protein; supported pentacyclic triterpene synthase (O4C11)   | 18   | 26   | 25   | 25   | 24     | 29   | 23   | 26   | 0.88     | 0.351496 | 19   | 26   | 33   | 21   | 26   | 22   | 28   | 23   | 26       | 24   | 1.08     | 0.599787 | 23   | 1.12     | 0.540303 |
| 245259_at   | A1g14150  | kinase like protein; supported by cDNV chromatin-associated kinase-related         | 153  | 260  | 180  | 193  | 212    | 163  | 178  | 190  | 0.94     | 0.584535 | 112  | 91   | 133  | 141  | 126  | 98   | 149  | 144  | 112      | 132  | 0.85     | 0.248219 | 122  | 0.92     | 0.614341 |
| 245260_at   | A1g16360  | kinase like protein; supported by cDNV F-AMP-activated protein kinase-beta 2-1     | 245  | 302  | 307  | 472  | 490911 | 253  | 304  | 346  | 0.74     | 0.009011 | 253  | 251  | 262  | 262  | 334  | 298  | 330  | 332  | 247      | 335  | 0.75     | 0.01582  | 339  | 0.77     | 0.043332 |
| 245261_at   | A1g14385  | predicted protein; supported by cDNA: asparyl protease family protein              | 121  | 95   | 184  | 54   | 64     | 70   | 133  | 63   | 2.12     | 0.057938 | 159  | 206  | 124  | 131  | 132  | 98   | 185  | 182  | 163      | 146  | 1.12     | 0.563614 | 120  | 1.35     | 0.181047 |
| 245262_at   | A1g17740  | PSI1 D1 protein processing enzyme; s C-terminal processing protease, putative      | 169  | 243  | 227  | 235  | 293    | 206  | 213  | 245  | 0.87     | 0.401310 | 197  | 169  | 194  | 241  | 215  | 197  | 250  | 237  | 186      | 228  | 0.82     | 0.027737 | 218  | 0.86     | 0.114517 |
| 245264_at   | A1g17245  | Expressed protein; supported by cDNV zinc finger (C3HC4-type RING finger) fa       | 26   | 26   | 30   | 33   | 31     | 31   | 27   | 32   | 0.86     | 0.037636 | 23   | 19   | 26   | 28   | 21   | 20   | 29   | 30   | 25       | 26   | 0.90     | 0.905904 | 23   | 1.10     | 0.439477 |
| 245265_at   | A1g14400  | hypothesized protein; supported by cDN ankryrin repeat family protein              | 45   | 49   | 73   | 58   | 61     | 55   | 56   | 58   | 0.96     | 0.818851 | 32   | 34   | 43   | 32   | 29   | 32   | 41   | 36   | 36       | 34   | 1.05     | 0.645525 | 31   | 1.15     | 0.241667 |
| 245266_at   | A1g17070  | hypothesized protein; supported by cDN expressed protein                           | 171  | 188  | 211  | 203  | 248    | 201  | 190  | 217  | 0.87     | 0.223860 | 135  | 154  | 147  | 213  | 168  | 155  | 162  | 151  | 145      | 170  | 0.86     | 0.168590 | 179  | 0.81     | 0.146978 |
| 245267_at   | A1g14060  | major latex protein like; supported by c major latex protein-related / MLP-relatec | 127  | 122  | 23   | 23   | 27     | 23   | 21   | 25   | 0.84     | 0.148636 | 18   | 15   | 23   | 19   | 16   | 18   | 17   | 18   | 19       | 18   | 1.06     | 0.552897 | 18   | 1.07     | 0.693239 |
| 245268_at   | A1g16570  | hypothesized protein; supported by cDN protein arginine N-methyltransferase-rel    | 139  | 179  | 183  | 186  | 192    | 178  | 154  | 189  | 0.92     | 0.236969 | 114  | 114  | 129  | 138  | 113  | 109  | 119  | 119  | 119      | 119  | 1.00     | 0.990979 | 119  | 1.02     | 0.842769 |
| 245269_at   | A1g14500  | hypothesized protein; supported by cDN expressed protein                           | 777  | 1257 | 1242 | 874  | 1105   | 712  | 1092 | 897  | 1.22     | 0.373370 | 810  | 723  | 685  | 892  | 815  | 775  | 992  | 950  | 740      | 885  | 0.84     | 0.052724 | 827  | 0.89     | 0.157086 |
| 245270_at   | A1g14960  | tubulin alpha-chain (TUA6); support tubulin alpha2-alpha-4 chain (TUA21) //        | 2092 | 2361 | 1980 | 2736 | 2997   | 2364 | 2144 | 2699 | 0.79     | 0.062058 | 2084 | 1848 | 2160 | 2623 | 2362 | 1954 | 2404 | 2271 | 2031     | 2323 | 0.87     | 0.118644 | 233  | 0.88     | 0.261634 |
| 245271_at   | A1g16430  | transcription factor like protein; succor beta helix-loo-helix (bHLH) family prot  | 270  | 309  | 346  | 439  | 444    | 381  | 309  | 421  | 0.73     | 0.020022 | 253  | 271  | 321  | 422  | 367  | 289  | 361  | 375  | 282      | 363  | 0.78     | 0.044350 | 359  | 0.78     | 0.148135 |
| 245272_at   | A1g17250  | hypothesized protein; supported by cDN expressed protein                           | 18   | 24   | 18   | 24   | 23     | 24   | 20   | 25   | 0.81     | 0.085157 | 17   | 18   | 20   | 21   | 17   | 18   | 19   | 245  | 0.626753 | 18   | 1.02     | 0.846771 |      |          |          |
| 245273_at   | A1g14950  | hypothesized protein; supported by cDN expressed protein                           | 202  | 228  | 250  | 293  | 331    | 202  | 179  | 209  | 0.92     | 0.099215 | 212  | 199  | 235  | 239  | 283  | 240  | 267  | 277  | 240      | 287  | 0.77     | 0.049896 | 287  | 0.74     | 0.073769 |
| 245274_at   | A1g14360  | ankryrin like protein; supported by cDN dehydratation-responsive protein-related   | 136  | 175  | 158  | 178  | 205    | 151  | 156  | 178  | 0.88     | 0.318259 | 144  | 117  | 142  | 168  | 157  | 136  | 137  | 123  | 134      | 144  | 0.93     | 0.446036 | 154  | 0.87     | 0.200554 |
| 245247_at   | A1g17230  | scarcrow-like 13 (SCL13); supported scarcrow-like transcription factor 13 (S)      | 255  | 262  | 359  | 525  | 589    | 426  | 292  | 514  | 0.57     | 0.018860 | 219  | 222  | 204  | 218  | 209  | 288  | 272  | 215  | 255      | 0.84 | 0.138248 | 238      | 0.90 | 0.414098 |          |
| 245216_at   | A1g16143  | Expressed protein non-consensus Gq importin alpha-2, putative (IMPA-2)             | 313  | 383  | 393  | 496  | 532    | 415  | 363  | 481  | 0.76     | 0.051954 | 272  | 260  | 301  | 422  | 345  | 321  | 337  | 312  | 378      | 448  | 0.80     | 0.043747 | 363  | 0.77     | 0.059388 |
| 245217_at   | A1g16340  | retroelement cod polyprotein, putative                                             | 22   | 31   | 24   | 28   | 27     | 28   | 24   | 28   | 0.87     | 0.187822 | 18   | 19   | 26   | 22   | 15   | 21   | 23   | 31   | 32       | 32   | 0.84     | 0.417037 | 31   | 0.98     | 0.886903 |
| 245218_s_at | A1g15842  | viral resistance protein, putative 5' dar disease resistance protein (CC-NBS-LR    | 291  | 469  | 62   | 62   | 44     | 50   | 56   | 58   | 0.89     | 0.555300 | 36   | 39   | 41   | 47   | 47   | 42   | 42   | 39   | 44       | 48   | 0.88     | 0.036113 | 46   | 0.85     | 0.036100 |
| 245219_at   | A1g159124 | viral resistance protein, putative 5' dar disease resistance protein (CC-NBS-LR    | 391  | 464  | 392  | 465  | 433    | 372  | 382  | 423  | 0.90     |          |      |      |      |      |      |      |      |      |          |      |          |          |      |          |          |

|             |           |                                                                                          |      |      |      |      |       |      |      |          |          |          |      |      |      |      |      |      |      |      |      |      |          |           |      |          |          |
|-------------|-----------|------------------------------------------------------------------------------------------|------|------|------|------|-------|------|------|----------|----------|----------|------|------|------|------|------|------|------|------|------|------|----------|-----------|------|----------|----------|
| 245202      | At1g67720 | F12A21.14 similar to receptor protein k leucine-rich repeat family / protein             | 246  | 238  | 294  | 299  | 320   | 283  | 260  | 300      | 0.86     | 0.117046 | 264  | 205  | 280  | 289  | 266  | 187  | 255  | 244  | 250  | 248  | 1.01     | 0.965231  | 248  | 1.01     | 0.960072 |
| 245203      | At3g33080 | hypothetical protein similar to protein p hypothetical protein /// pseudogene, hyp       | 9    | 9    | 9    | 9    | 9     | 11   | 9    | 10       | 0.94     | 0.355360 | 9    | 9    | 9    | 6    | 7    | 7    | 11   | 10   | 9    | 8    | 1.09     | 0.578216  | 7    | 1.30     | 0.021297 |
| 245204      | At5g12270 | 1-AMINOCYCLOPROPANE-1-CARBOXYDEHYDROXYLASE: ZOG-FerII oxovanone f                        | 659  | 739  | 968  | 748  | 1401  | 904  | 789  | 1017     | 0.83     | 0.352585 | 1070 | 1081 | 834  | 983  | 1141 | 1175 | 1523 | 1526 | 995  | 1270 | 0.78     | 0.130089  | 1100 | 0.90     | 0.352578 |
| 245205      | At5g12280 | hypothetical protein similar to putative fap hypophosphate lyase                         | 217  | 216  | 310  | 310  | 365   | 168  | 259  | 347      | 0.75     | 0.039110 | 168  | 257  | 187  | 207  | 221  | 196  | 216  | 254  | 231  | 171  | 0.77     | 0.015289  | 205  | 0.91     | 0.028244 |
| 245206      | At5g12290 | outvative protein similarity to NCA2 crot expressed protein                              | 221  | 291  | 331  | 316  | 383   | 252  | 281  | 317      | 0.89     | 0.509378 | 198  | 175  | 215  | 205  | 237  | 202  | 211  | 228  | 195  | 228  | 0.86     | 0.086587  | 233  | 0.84     | 0.137364 |
| 245207      | At5g12310 | RING finger-like protein similarity to an zinc finger (C3HC4-type RING finger) f         | 321  | 522  | 528  | 545  | 602   | 468  | 457  | 538      | 0.85     | 0.358899 | 471  | 487  | 507  | 719  | 558  | 528  | 561  | 539  | 489  | 581  | 0.84     | 0.103098  | 601  | 0.81     | 0.136818 |
| 245208      | At5g12330 | lateral root primordia (LRP1)                                                            | 43   | 67   | 68   | 189  | 159   | 152  | 56   | 166      | 0.34     | 0.001217 | 77   | 78   | 82   | 245  | 201  | 185  | 208  | 204  | 79   | 209  | 0.38     | 0.000084  | 210  | 0.38     | 0.001867 |
| 245209      | At5g12340 | outvative protein similarity to expressed protein                                        | 15   | 15   | 15   | 15   | 15    | 20   | 15   | 15       | 0.86     | 0.311865 | 13   | 16   | 15   | 16   | 14   | 13   | 17   | 15   | 14   | 13   | 1.17     | 0.251655  | 13   | 1.17     | 0.014749 |
| 245210      | At5g12350 | outvative protein similarity to UVB-resist zinc finger protein, outvative / regulator    | 128  | 190  | 188  | 198  | 198   | 159  | 169  | 181      | 0.93     | 0.631248 | 118  | 122  | 136  | 171  | 145  | 113  | 167  | 140  | 125  | 147  | 0.85     | 0.186014  | 143  | 0.88     | 0.375009 |
| 245211      | At5g12370 | outvative protein similarity to GSC1. Drc exocyst complex component Sec10-rela           | 356  | 456  | 496  | 546  | 634   | 473  | 438  | 551      | 0.79     | 0.139029 | 325  | 294  | 348  | 440  | 386  | 324  | 371  | 370  | 322  | 378  | 0.85     | 0.087730  | 383  | 0.84     | 0.176620 |
| 245177      | At5g12380 | annexin-like protein oemdel suoot annexin, putative                                      | 165  | 187  | 219  | 15   | 20    | 16   | 19   | 17       | 11.23    | 0.000393 | 231  | 218  | 197  | 17   | 15   | 20   | 17   | 16   | 215  | 17   | 12.76    | 0.000000  | 17   | 12.49    | 0.000039 |
| 245178      | At5g12390 | outvative protein similarity to ratelina fap hypophosphate lyase                         | 185  | 252  | 218  | 258  | 302   | 234  | 252  | 264      | 0.34     | 0.782624 | 200  | 241  | 226  | 297  | 238  | 232  | 234  | 223  | 252  | 0.88 | 0.158749 | 256       | 0.87 | 0.240053 |          |
| 245179      | At5g12400 | putative protein similarity to predicted : PHD finger transcription factor, putative     | 283  | 270  | 245  | 247  | 279   | 203  | 233  | 243      | 0.96     | 0.784938 | 137  | 110  | 139  | 172  | 151  | 121  | 166  | 146  | 132  | 151  | 0.87     | 0.171927  | 148  | 0.89     | 0.362456 |
| 245180      | At5g12410 | putative protein similarity to proteins of THUMP domain-containing protein               | 412  | 550  | 569  | 616  | 624   | 498  | 510  | 579      | 0.88     | 0.344525 | 462  | 540  | 541  | 769  | 590  | 495  | 578  | 557  | 515  | 598  | 0.86     | 0.242233  | 618  | 0.83     | 0.289579 |
| 245181      | At5g12420 | putative protein similarity to various ree expressed protein                             | 14   | 12   | 15   | 13   | 14    | 13   | 14   | 13       | 1.08     | 0.377073 | 11   | 16   | 15   | 14   | 9    | 13   | 13   | 14   | 14   | 12   | 1.12     | 0.400037  | 12   | 1.18     | 0.394062 |
| 245182      | At5g12430 | outvative protein similarity to TETRATR DNA heat shock N-terminal domain-co              | 72   | 107  | 101  | 113  | 126   | 104  | 93   | 114      | 0.82     | 0.168037 | 83   | 75   | 82   | 110  | 81   | 80   | 77   | 87   | 80   | 87   | 0.92     | 0.413148  | 90   | 0.88     | 0.362570 |
| 245183      | At5g12440 | putative protein similarity to predicted : zinc finger (CCHC-type) family protein        | 111  | 178  | 170  | 283  | 265   | 215  | 153  | 257      | 0.60     | 0.029276 | 145  | 149  | 167  | 239  | 189  | 169  | 192  | 176  | 154  | 193  | 0.80     | 0.060045  | 199  | 0.77     | 0.104919 |
| 245153      | At5g12450 | outvative protein similarity to predicted : hypothetical protein                         | 13   | 17   | 22   | 25   | 21    | 21   | 17   | 22       | 0.79     | 0.201325 | 8    | 7    | 10   | 14   | 6    | 10   | 10   | 13   | 9    | 11   | 0.80     | 0.302658  | 10   | 0.83     | 0.539210 |
| 245154      | At5g12460 | putative protein similarity to predicted p fringe-related protein                        | 22   | 26   | 33   | 27   | 30    | 28   | 27   | 28       | 0.95     | 0.708805 | 14   | 18   | 17   | 21   | 20   | 25   | 23   | 19   | 16   | 22   | 0.75     | 0.014473  | 22   | 0.74     | 0.033058 |
| 245155      | At5g12470 | putative protein similarity to predicted i expressed protein                             | 394  | 518  | 528  | 604  | 631   | 484  | 480  | 573      | 0.84     | 0.209859 | 466  | 441  | 542  | 739  | 610  | 533  | 500  | 472  | 483  | 571  | 0.85     | 0.241394  | 627  | 0.77     | 0.098695 |
| 245156      | At5g12480 | calcium-dependent protein kinase-like: calmodulin-domain protein kinase isofon           | 251  | 344  | 320  | 352  | 398   | 295  | 303  | 348      | 0.88     | 0.347413 | 268  | 227  | 270  | 356  | 294  | 281  | 271  | 262  | 255  | 292  | 0.87     | 0.179537  | 310  | 0.82     | 0.113342 |
| 245157      | At2g33160 | putative polyglutaronase      glucoside hydrolase family 28 protein / o                  | 9    | 7    | 11   | 11   | 12    | 13   | 9    | 12       | 0.75     | 0.080950 | 8    | 10   | 5    | 8    | 7    | 8    | 12   | 8    | 8    | 9    | 0.88     | 0.552864  | 8    | 0.99     | 0.956991 |
| 245158      | At2g33130 | hypothetical protein predicted by oenef rad alkalization factor (RALF) fami              | 360  | 426  | 520  | 32   | 38    | 31   | 435  | 34       | 12.81    | 0.000989 | 444  | 444  | 424  | 40   | 31   | 42   | 45   | 33   | 437  | 38   | 11.40    | 0.000000  | 38   | 11.53    | 0.000001 |
| 245159      | At2g33100 | putative cellulose synthase      cellulose synthase family protein                       | 27   | 22   | 34   | 26   | 24    | 27   | 25   | 1.08     | 0.587347 | 23       | 13   | 24   | 16   | 17   | 15   | 20   | 16   | 20   | 17   | 1.17 | 0.134894 | 16        | 1.23 | 0.367568 |          |
| 245160      | At2g33080 | putative leucine-rich repeat disease res leucine-rich repeat family protein              | 17   | 21   | 30   | 22   | 21    | 25   | 23   | 23       | 0.99     | 0.955537 | 19   | 19   | 24   | 25   | 20   | 19   | 28   | 27   | 21   | 24   | 0.87     | 0.313302  | 21   | 0.98     | 0.844105 |
| 245161      | At2g33070 | putative myosinase binding protein      talacin lectin family protein                    | 28   | 44   | 65   | 387  | 58    | 58   | 49   | 168      | 0.29     | 0.342954 | 32   | 27   | 37   | 39   | 30   | 31   | 36   | 36   | 32   | 35   | 0.92     | 0.423218  | 33   | 0.95     | 0.731300 |
| 245162      | At2g33240 | putative myosin heavy chain      myosin, putative                                        | 60   | 67   | 75   | 79   | 91    | 72   | 67   | 81       | 0.83     | 0.117368 | 54   | 46   | 58   | 61   | 54   | 41   | 49   | 54   | 53   | 52   | 1.01     | 0.889475  | 52   | 1.01     | 0.928218 |
| 245163      | At2g33230 | outvative flavin-containing monooxygenase flavin-containing monooxygenase, outa          | 49   | 46   | 69   | 67   | 73    | 66   | 55   | 69       | 0.80     | 0.140814 | 39   | 45   | 40   | 41   | 39   | 39   | 44   | 36   | 41   | 40   | 1.04     | 0.522555  | 40   | 1.04     | 0.464217 |
| 245164      | At2g33210 | mitochondrial chaperonin (HSP60)      chaperonin, putative                               | 869  | 1024 | 950  | 1102 | 1278  | 1020 | 947  | 1103     | 0.84     | 0.103131 | 811  | 711  | 896  | 1027 | 956  | 802  | 937  | 845  | 806  | 913  | 0.88     | 0.157119  | 928  | 0.87     | 0.225430 |
| 245165      | At2g33180 | outvative protein predicted by oenefnd expressed protein                                 | 90   | 147  | 144  | 150  | 173   | 150  | 248  | 382      | 0.75     | 0.077036 | 147  | 136  | 168  | 167  | 164  | 176  | 174  | 183  | 153  | 0.83 | 0.142923 | 190       | 0.80 | 0.185655 |          |
| 245166      | At2g33170 | putative receptor-like protein kinase      leucine-rich repeat transmembrane prot        | 307  | 345  | 80   | 93   | 110   | 84   | 68   | 96       | 0.71     | 0.081643 | 37   | 39   | 47   | 50   | 48   | 38   | 48   | 42   | 41   | 45   | 0.91     | 0.329597  | 45   | 0.91     | 0.463398 |
| 245167_s_at | At2g33120 | putative synaptobrevin      supported by fl synaptobrevin-related protein / vesicle-i    | 307  | 346  | 370  | 516  | 528   | 414  | 341  | 486      | 0.70     | 0.022843 | 258  | 314  | 339  | 523  | 392  | 376  | 377  | 334  | 303  | 401  | 0.76     | 0.079277  | 431  | 0.70     | 0.071228 |
| 245168      | At2g33150 | 3-ketoadipyl-CoA thiolase      supported by acetyl-CoA C-acyltransferase, putative /     | 407  | 1237 | 1228 | 1304 | 1516  | 1050 | 1124 | 1290     | 0.87     | 0.397011 | 1159 | 1184 | 1070 | 1337 | 1229 | 1166 | 1183 | 1177 | 1138 | 1218 | 0.93     | 0.150579  | 1244 | 0.91     | 0.155187 |
| 245169      | At2g33220 | unknown protein predicted by oenefnd expressed protein                                   | 36   | 36   | 51   | 48   | 52    | 50   | 41   | 57       | 0.82     | 0.146368 | 35   | 35   | 48   | 50   | 37   | 43   | 42   | 45   | 39   | 43   | 0.90     | 0.363974  | 43   | 0.90     | 0.510062 |
| 245170      | At2g47570 | 60S ribosomal protein L18. Spaa12c Nc: 60S ribosomal protein L18 (RPL18A)                | 41   | 48   | 54   | 47   | 51    | 58   | 48   | 52       | 0.92     | 0.439178 | 46   | 38   | 51   | 43   | 36   | 41   | 50   | 43   | 45   | 42   | 1.06     | 0.580253  | 40   | 1.13     | 0.314704 |
| 245171      | At2g47560 | hypothetical protein predicted by oenefnd expressed protein                              | 56   | 91   | 71   | 142  | 158   | 130  | 73   | 143      | 0.51     | 0.005365 | 44   | 48   | 50   | 132  | 109  | 86   | 75   | 70   | 47   | 94   | 0.50     | 0.023970  | 109  | 0.44     | 0.010607 |
| 245172      | At2g47540 | hypothetical protein predicted by oenefnd expressed protein                              | 26   | 32   | 39   | 35   | 36    | 32   | 35   | 0.91     | 0.454284 | 26       | 25   | 34   | 28   | 23   | 24   | 31   | 26   | 28   | 27   | 1.06 | 0.598252 | 25        | 1.12 | 0.397433 |          |
| 245173      | At2g47530 | putative AP2 domain transcription factor: AP2 domain-containing transcription fac        | 27   | 29   | 41   | 39   | 33    | 35   | 0.93 | 0.651590 | 22       | 25       | 34   | 28   | 24   | 27   | 26   | 28   | 31   | 24   | 24   | 27   | 0.85     | 0.124933  | 27   | 0.80     | 0.103752 |
| 245174      | At2g47500 | putative kinesin heavy chain      kinesin motor protein-related                          | 91   | 104  | 89   | 110  | 118   | 92   | 95   | 107      | 0.89     | 0.248045 | 72   | 74   | 75   | 90   | 73   | 58   | 76   | 60   | 74   | 71   | 1.03     | 0.766779  | 74   | 1.00     | 0.991198 |
| 245175      | At2g47470 | unknown protein disulfide-isomerase      thioredoxin family protein                      | 2932 | 3312 | 3157 | 3315 | 3640  | 2979 | 3134 | 3311     | 0.95     | 0.464793 | 2888 | 2808 | 3013 | 3433 | 3180 | 2809 | 2948 | 2925 | 2903 | 3059 | 0.95     | 0.352720  | 3141 | 0.92     | 0.281490 |
| 245176      | At2g47440 | putative protein similar to GP210453 DNA heat shock N-terminal domain-co                 | 586  | 592  | 625  | 548  | 678   | 456  | 601  | 561      | 0.17     | 0.573878 | 772  | 793  | 658  | 902  | 772  | 636  | 1106 | 1019 | 741  | 887  | 0.84     | 0.256509  | 770  | 0.96     | 0.757677 |
| 245140      | At2g47620 | putative SWI5NF family transcription factor: SWIRM domain-containing protein / DN        | 128  | 173  | 189  | 202  | 219   | 195  | 163  | 206      | 0.79     | 0.097167 | 96   | 101  | 124  | 160  | 129  | 110  | 132  | 131  | 107  | 132  | 0.81     | 0.085255  | 133  | 0.80     | 0.198053 |
| 245150      | At2g47580 | photoreceptor-blue-light receptor (PHR2)      photoreceptor-blue-light photoreceptor (PH | 154  | 205  | 154  | 205  | 268   | 213  | 184  | 245      | 0.75     | 0.049532 | 204  | 197  | 241  | 208  | 215  | 193  | 208  | 242  | 222  | 208  | 0.86     | 0.027870  | 232  | 0.91     | 0.460206 |
| 245151      | At2g47550 | putative pectinesterase      supported by pectinesterase family protein                  | 15   | 18   | 20   | 22   | 24    | 21   | 18   | 22       | 0.79     | 0.056355 | 22   | 26   | 18   | 18   | 17   | 20   | 24   | 22   | 22   | 20   | 1.11     | 0.416170  | 18   | 1.22     | 0.264163 |
| 245152      | At2g47490 | putative mitochondrial carrier protein s1 mitochondrial substrate carrier family pr      | 280  | 330  | 356  | 417  | 378   | 362  | 324  | 386      | 0.84     | 0.078707 | 260  | 246  | 311  | 460  | 358  | 270  | 284  | 298  | 272  | 334  | 0.84     | 0.0125620 | 363  | 0.75     | 0.196202 |
| 245121      | At2g47610 | 60S ribosomal protein L7A      supported 60S ribosomal protein L7A (RPL7Aa)              | 2842 | 3322 | 3323 | 3378 | 3645  | 3055 | 3163 | 3359     | 0.94     | 0.447769 | 2931 | 3365 | 3270 | 3613 | 3249 | 2988 | 3200 | 3191 | 3188 | 3230 | 0.99     | 0.843335  | 3253 | 0.98     | 0.804398 |
| 245122      | At2g47420 | outvative methionine transferase      methionyladenosine transferase, putative           | 226  | 210  | 226  | 232  | 267   | 238  | 227  | 244      | 0.82     | 0.074367 | 261  | 230  | 277  | 365  | 284  | 291  | 284  | 291  | 283  | 299  | 0.94     | 0.456392  | 312  | 0.91     | 0.312165 |
| 245123      | At2g47450 | unknown protein      supported by cDNA: chloroplast signal recognition particle co       | 345  | 610  | 549  | 410  | 470</ |      |      |          |          |          |      |      |      |      |      |      |      |      |      |      |          |           |      |          |          |

|             |           |                                            |                                                |                                          |                                  |      |      |      |      |      |      |      |          |          |          |     |      |      |      |      |      |      |          |      |          |          |          |          |          |          |
|-------------|-----------|--------------------------------------------|------------------------------------------------|------------------------------------------|----------------------------------|------|------|------|------|------|------|------|----------|----------|----------|-----|------|------|------|------|------|------|----------|------|----------|----------|----------|----------|----------|----------|
| 245114_at   | A12g41630 | transcription factor IIB (TFIIB) identical | transcription initiation factor IIB-1 / cene   | 342                                      | 382                              | 455  | 485  | 544  | 401  | 393  | 477  | 0.82 | 0.188557 | 355      | 357      | 363 | 563  | 430  | 413  | 354  | 352  | 358  | 423      | 0.85 | 0.255982 | 469      | 0.76     | 0.079743 |          |          |
| 245115_at   | A12g41530 | putative esterase D                        | - supported by full-l                          | transcription, putative                  | 420                              | 539  | 559  | 666  | 716  | 577  | 506  | 653  | 0.77     | 0.068892 | 531      | 643 | 602  | 910  | 765  | 696  | 762  | 694  | 592      | 765  | 0.77     | 0.023670 | 700      | 0.75     | 0.043932 |          |
| 245116_at   | A12g41620 | unknown protein                            | - supported by cDNA                            | thioredoxin interactio                   | composant fami                   | 354  | 431  | 475  | 434  | 537  | 400  | 457  | 0.92     | 0.533318 | 314      | 267 | 328  | 369  | 389  | 321  | 345  | 349  | 303      | 355  | 0.85     | 0.043696 | 360      | 0.84     | 0.106003 |          |
| 245117_at   | A12g41660 | putative Ca2+-ATPase                       | - supported by cDNA                            | ATPase 4, classa                         | 245                              | 511  | 520  | 530  | 451  | 321  | 480  | 377  | 1.31     | 0.117833 | 328      | 293 | 339  | 317  | 339  | 311  | 329  | 362  | 311      | 311  | 1.02     | 0.15094  | 276      | 0.91     | 0.096195 |          |
| 245118_at   | A12g41680 | unknown thioesteron reductase              | Tha                                            | thioesteron reductase, component / NADPH | 110                              | 165  | 139  | 157  | 175  | 121  | 138  | 151  | 0.91     | 0.592855 | 134      | 129 | 147  | 225  | 174  | 154  | 170  | 171  | 137      | 179  | 0.76     | 0.044560 | 184      | 0.74     | 0.096195 |          |
| 245119_at   | A12g41640 | unknown protein                            | - supported by cDNA                            | expressed protein                        | 45                               | 17   | 51   | 36   | 27   | 27   | 37   | 27   | 0.38     | 0.496525 | 33       | 44  | 30   | 26   | 26   | 23   | 48   | 43   | 36       | 33   | 1.07     | 0.773942 | 25       | 1.42     | 0.065834 |          |
| 245120_at   | A12g39810 | hypothetical protein predicted by cene     | expressed protein                              | 204                                      | 281                              | 281  | 267  | 301  | 203  | 255  | 257  | 0.99 | 0.968396 | 188      | 145      | 166 | 209  | 175  | 152  | 193  | 187  | 166  | 183      | 0.91 | 0.320890 | 179      | 0.93     | 0.582846 |          |          |
| 245084_at   | A12g39820 | putative translation initiation factor     | 62                                             | 62                                       | 62                               | 62   | 62   | 62   | 62   | 62   | 62   | 62   | 1.08     | 0.000002 | 72       | 65  | 71   | 78   | 63   | 65   | 65   | 65   | 65       | 65   | 1.12     | 0.243020 | 69       | 1.02     | 0.101920 |          |
| 245087_at   | A12g39830 | hypothetical protein predicted by cene     | LM domain-containing protein                   | 59                                       | 81                               | 61   | 88   | 111  | 90   | 67   | 97   | 0.69 | 0.044626 | 66       | 63       | 64  | 101  | 86   | 77   | 100  | 88   | 64   | 92       | 0.70 | 0.010200 | 88       | 0.73     | 0.028217 |          |          |
| 245088_at   | A12g39850 | subtilisin-like serine protease            | contains                                       | subtilase family protein                 | 18                               | 24   | 23   | 25   | 21   | 23   | 22   | 23   | 0.94     | 0.544027 | 17       | 16  | 21   | 20   | 14   | 17   | 21   | 22   | 18       | 19   | 0.96     | 0.737372 | 17       | 1.07     | 0.656676 |          |
| 245098_at   | A12g39790 | hypothetical protein predicted by cene     | mitochondrial olcoveiron family protein        | 17                                       | 22                               | 23   | 24   | 24   | 22   | 21   | 24   | 0.85 | 0.191278 | 20       | 18       | 21  | 19   | 14   | 19   | 20   | 19   | 20   | 18       | 1.09 | 0.295519 | 18       | 1.14     | 0.256694 |          |          |
| 245099_at   | A12g39720 | unknown protein                            | - supported by full-len                        | cfiner / C3HC4-tye RING finer / fa       | 254                              | 490  | 390  | 396  | 390  | 325  | 280  | 370  | 0.76     | 0.025908 | 267      | 254 | 273  | 486  | 330  | 286  | 423  | 377  | 265      | 380  | 0.70     | 0.048005 | 367      | 0.72     | 0.166639 |          |
| 245060_at   | A12g39770 | GDP-mannose pyrophosphorylase              | GDP-mannose pyrophosphorylase (GM              | 420                                      | 813                              | 701  | 702  | 856  | 599  | 687  | 719  | 0.93 | 0.038553 | 417      | 350      | 420 | 501  | 557  | 473  | 549  | 518  | 398  | 520      | 0.76 | 0.003427 | 510      | 0.78     | 0.025965 |          |          |
| 245061_at   | A12g39730 | hypothetical protein                       | - supported by full-l                          | ribulose biphosphate carboxylase/oxyg    | 874                              | 1358 | 1048 | 1436 | 1283 | 1010 | 1093 | 1243 | 0.88     | 0.471840 | 813      | 767 | 899  | 1346 | 961  | 845  | 959  | 1006 | 826      | 1023 | 0.81     | 0.142029 | 1051     | 0.79     | 0.224146 |          |
| 245062_at   | A12g39760 | hypothetical protein predicted by cene     | specle-type POZ protein-related                | 200                                      | 274                              | 231  | 259  | 285  | 214  | 235  | 252  | 0.93 | 0.596959 | 200      | 222      | 232 | 315  | 242  | 210  | 267  | 254  | 218  | 258      | 0.85 | 0.145954 | 256      | 0.85     | 0.308531 |          |          |
| 245063_at   | A12g39795 | Excessed protein                           | - supported by full-l                          | mitochondrial olcoveiron family protein  | 329                              | 390  | 375  | 479  | 515  | 413  | 365  | 469  | 0.78     | 0.041833 | 388      | 377 | 439  | 596  | 481  | 475  | 419  | 408  | 401      | 476  | 0.84     | 0.161738 | 518      | 0.78     | 0.056296 |          |
| 245064_at   | A12g39725 | Excessed protein                           | - supported by full-l                          | complez                                  | 1 family protein / LVR family on | 107  | 152  | 153  | 148  | 172  | 137  | 137  | 132      | 0.90     | 0.453131 | 139 | 132  | 162  | 205  | 166  | 143  | 177  | 162      | 144  | 170      | 0.85     | 0.135555 | 171      | 0.84     | 0.255531 |
| 245065_at   | A12g39750 | unknown protein                            | - supported by cDNA                            | hydration-responsive family protein      | 386                              | 478  | 455  | 566  | 589  | 467  | 440  | 541  | 0.81     | 0.097244 | 431      | 425 | 450  | 575  | 501  | 399  | 528  | 495  | 435      | 499  | 0.87     | 0.149379 | 491      | 0.89     | 0.337661 |          |
| 245066_at   | A12g39840 | putative serine/threonine protein phosph   | serine/threonine protein phosphatase P1        | 205                                      | 261                              | 298  | 331  | 376  | 276  | 255  | 328  | 0.78 | 0.139228 | 239      | 225      | 238 | 318  | 285  | 255  | 303  | 278  | 234  | 288      | 0.81 | 0.101033 | 286      | 0.82     | 0.049081 |          |          |
| 245067_at   | A12g39780 | S-like ribonuclease RNS2 identical to r    | ribonuclease 2 (RNS2)                          | 685                                      | 848                              | 787  | 1044 | 1080 | 854  | 767  | 993  | 0.77 | 0.062586 | 920      | 1020     | 956 | 1504 | 1180 | 1051 | 1121 | 1082 | 965  | 1188     | 0.81 | 0.092177 | 1245     | 0.78     | 0.111943 |          |          |
| 245068_at   | A12g23260 | putative glucosyltransferase               | putative glucosyltransferase                   | 32                                       | 44                               | 35   | 40   | 35   | 40   | 42   | 35   | 1.19 | 0.331558 | 38       | 41       | 39  | 27   | 23   | 23   | 29   | 25   | 155  | 0.000234 | 24   | 1.62     | 0.000558 |          |          |          |          |
| 245069_at   | A12g23250 | putative glucosyltransferase               | UDP-glucosyltransferase                        | 35                                       | 37                               | 46   | 38   | 44   | 43   | 40   | 42   | 0.94 | 0.575467 | 27       | 27       | 39  | 32   | 33   | 30   | 26   | 33   | 31   | 31       | 1.00 | 0.981033 | 32       | 0.97     | 0.815407 |          |          |
| 245070_at   | A12g23240 | metallothionein-like protein identical to  | plant EC metallothionein-like family 15 o      | 24                                       | 25                               | 33   | 234  | 32   | 38   | 27   | 101  | 0.27 | 0.328023 | 21       | 22       | 24  | 39   | 32   | 19   | 22   | 27   | 21   | 23       | 24   | 0.98     | 0.872814 | 24       | 0.98     | 0.896094 |          |
| 245071_at   | A12g23230 | putative vatspiadiene synthase             | terpene synthase/cyclase family protein        | 31                                       | 29                               | 38   | 32   | 36   | 36   | 33   | 35   | 0.94 | 0.548031 | 35       | 27       | 34  | 31   | 31   | 31   | 36   | 36   | 30   | 32       | 0.98 | 0.776681 | 32       | 0.98     | 0.827894 |          |          |
| 245072_s_at | A12g23220 | putative cytochrome P450                   | cytochrome P450, putative                      | 15                                       | 15                               | 15   | 15   | 19   | 14   | 15   | 16   | 0.92 | 0.386078 | 12       | 11       | 14  | 13   | 13   | 16   | 14   | 12   | 13   | 13       | 0.83 | 0.496462 | 12       | 1.02     | 0.845244 |          |          |
| 245073_at   | A12g23210 | putative glucosyltransferase               | UDP-glucosyltransferase                        | 12                                       | 11                               | 14   | 14   | 16   | 11   | 13   | 13   | 0.95 | 0.701478 | 8        | 7        | 7   | 9    | 11   | 9    | 13   | 8    | 7    | 10       | 0.77 | 0.093710 | 9        | 0.81     | 0.043532 |          |          |
| 245074_at   | A12g23200 | putative protein kinase contains a prote   | protein kinase family protein                  | 66                                       | 82                               | 99   | 98   | 101  | 90   | 82   | 96   | 0.86 | 0.230860 | 55       | 58       | 62  | 61   | 51   | 56   | 85   | 56   | 59   | 62       | 0.95 | 0.699152 | 56       | 1.05     | 0.503868 |          |          |
| 245075_at   | A12g23180 | putative cytochrome P450                   | cytochrome P450, putative                      | 28                                       | 27                               | 28   | 26   | 30   | 26   | 28   | 27   | 1.02 | 0.649512 | 30       | 23       | 33  | 32   | 30   | 30   | 30   | 28   | 30   | 28       | 30   | 0.94     | 0.462053 | 31       | 0.93     | 0.552141 |          |
| 245076_at   | A12g23170 | unknown protein                            | apxin-responsive GH3 family protein            | 18                                       | 129                              | 34   | 15   | 29   | 31   | 60   | 25   | 2.39 | 0.370809 | 28       | 30       | 34  | 20   | 18   | 14   | 23   | 14   | 31   | 18       | 1.76 | 0.001697 | 17       | 1.80     | 0.002900 |          |          |
| 245077_at   | A12g21600 | hypothetical protein predicted by cene     | S-box family protein                           | 33                                       | 44                               | 52   | 41   | 42   | 37   | 63   | 58   | 0.77 | 0.105008 | 28       | 28       | 32  | 32   | 32   | 32   | 32   | 32   | 32   | 32       | 1.02 | 0.795722 | 30       | 1.06     | 0.096770 |          |          |
| 245078_at   | A12g23340 | putative AP2 domain transcription fac      | AP2 domain-containing transcription fac        | 133                                      | 161                              | 152  | 186  | 184  | 194  | 149  | 188  | 0.79 | 0.010359 | 138      | 132      | 137 | 204  | 142  | 134  | 178  | 155  | 135  | 163      | 0.83 | 0.157991 | 160      | 0.85     | 0.325555 |          |          |
| 245079_at   | A12g23330 | putative retroelement pol                  | polyprotein                                    | 47                                       | 46                               | 50   | 58   | 60   | 49   | 48   | 56   | 0.85 | 0.077471 | 43       | 41       | 54  | 36   | 37   | 37   | 44   | 46   | 46   | 40       | 1.16 | 0.168570 | 37       | 1.26     | 0.076582 |          |          |
| 245080_at   | A12g23300 | putative receptor-like protein kinase      | leucine-rich repeat transmembrane prote        | 176                                      | 159                              | 187  | 189  | 188  | 150  | 174  | 176  | 0.99 | 0.920689 | 175      | 171      | 188 | 211  | 172  | 139  | 193  | 196  | 178  | 182      | 0.98 | 0.825298 | 174      | 1.02     | 0.852175 |          |          |
| 245081_at   | A12g23280 | unknown protein overlap with T20D16.8      | unknown protein overlap with T20D16.8          | 62                                       | 77                               | 49   | 41   | 42   | 37   | 63   | 40   | 1.57 | 0.404540 | 67       | 96       | 78  | 61   | 41   | 41   | 48   | 43   | 81   | 47       | 1.72 | 0.035501 | 48       | 1.69     | 0.038469 |          |          |
| 245082_at   | A12g23270 | hypothetical protein predicted by cene     | expressed protein                              | 46                                       | 46                               | 58   | 58   | 62   | 56   | 50   | 59   | 0.85 | 0.123341 | 38       | 34       | 43  | 41   | 35   | 43   | 52   | 41   | 38   | 42       | 0.89 | 0.306289 | 40       | 0.96     | 0.633075 |          |          |
| 245083_at   | A12g23310 | putative internal membrane protein         | suo RER1C protein                              | 228                                      | 324                              | 291  | 298  | 344  | 255  | 281  | 299  | 0.94 | 0.656539 | 290      | 445      | 319 | 430  | 323  | 346  | 338  | 328  | 351  | 353      | 0.99 | 0.968600 | 367      | 0.96     | 0.805024 |          |          |
| 245084_at   | A12g23290 | putative MYB family transcription factor   | myb family transcription factor                | 413                                      | 363                              | 448  | 277  | 330  | 249  | 408  | 285  | 1.43 | 0.023905 | 388      | 453      | 442 | 407  | 289  | 259  | 358  | 369  | 428  | 336      | 1.27 | 0.057648 | 318      | 1.34     | 0.090934 |          |          |
| 245085_at   | A12g23350 | putative poly(A) binding protein           | suox polyadenylate-binding protein, putative / | 1012                                     | 1012                             | 875  | 931  | 1097 | 849  | 939  | 859  | 0.98 | 0.035853 | 736      | 595      | 727 | 777  | 729  | 604  | 847  | 771  | 676  | 746      | 0.91 | 0.099228 | 704      | 0.98     | 0.699127 |          |          |
| 245051_at   | A12g23320 | putative WRKY-type DNA-binding pro         | WRKY family transcription factor               | 414                                      | 543                              | 724  | 549  | 549  | 428  | 560  | 509  | 1.10 | 0.631125 | 382      | 443      | 435 | 658  | 450  | 492  | 626  | 643  | 420  | 574      | 0.73 | 0.039610 | 533      | 0.79     | 0.162427 |          |          |
| 245052_at   | A12g28440 | putative pectinesterase                    | pectinesterase family protein                  | 630                                      | 730                              | 527  | 1353 | 1268 | 1206 | 596  | 1276 | 0.47 | 0.001021 | 545      | 566      | 657 | 1339 | 942  | 816  | 825  | 789  | 589  | 942      | 0.83 | 0.044285 | 1032     | 0.57     | 0.051474 |          |          |
| 245053_at   | A12g28450 | putative pectinesterase                    | pectinesterase family protein                  | 51                                       | 55                               | 61   | 46   | 59   | 37   | 59   | 47   | 1.25 | 0.145123 | 30       | 34       | 32  | 34   | 29   | 32   | 24   | 23   | 32   | 28       | 1.13 | 0.260683 | 32       | 1.02     | 0.808215 |          |          |
| 245054_at   | A12g28460 | unknown protein                            | RED family protein                             | 197                                      | 214                              | 219  | 243  | 255  | 225  | 210  | 241  | 0.87 | 0.048454 | 177      | 174      | 192 | 270  | 185  | 180  | 220  | 200  | 181  | 211      | 0.96 | 0.225746 | 212      | 0.86     | 0.362692 |          |          |
| 245055_at   | A12g28470 | hypothetical protein predicted by cene     | expressed protein                              | 52                                       | 68                               | 75   | 62   | 82   | 63   | 65   | 76   | 0.86 | 0.311432 | 45       | 50       | 61  | 77   | 66   | 56   | 62   | 65   | 61   | 72       | 0.79 | 0.068445 | 62       | 0.79     | 0.159377 |          |          |
| 245056_at   | A12g28480 | putative glucosyltransferase               | UDP-glucosyltransferase                        | 39                                       | 35                               | 45   | 40   | 35   | 42   | 49   | 40   | 0.50 | 0.781097 | 36       | 34       | 43  | 38   | 39   | 41   | 38   | 40   | 39   | 41       | 0.95 | 0.383435 | 40       | 0.95     | 0.555321 |          |          |
| 245057_at   | A12g28490 | En/Spm-like transcription protein related  | transducin family protein / WD-40 repeat       | 22                                       | 24                               | 30   | 24   | 25   | 29   | 25   | 26   | 0.97 | 0.762374 | 15       | 14       | 18  | 16   | 17   | 16   | 15   | 17   | 16   | 15       | 1.03 | 0.261554 | 16       | 0.94     | 0.435689 |          |          |
| 245058_at   | A12g28550 | heme oxygenase 2 (HO2)                     | heme oxygenase 2 (HO2)                         | 176                                      | 211                              | 275  | 204  | 269  | 255  | 220  | 243  | 0.91 | 0.551780 | 151      | 222      | 270 | 281  | 235  | 187  | 162  | 174  | 214  | 208      | 1.03 | 0.876909 | 234      | 0.91     | 0.671279 |          |          |
| 245059_at   | A12g28570 | unknown protein                            | expressed protein                              | 107                                      | 151                              | 151  | 160  | 130  | 145  | 127  | 155  | 0.9  |          |          |          |     |      |      |      |      |      |      |          |      |          |          |          |          |          |          |

|           |                |                                         |                                         |      |      |      |      |      |      |      |      |      |          |          |      |      |      |      |      |      |      |      |      |          |          |      |          |          |
|-----------|----------------|-----------------------------------------|-----------------------------------------|------|------|------|------|------|------|------|------|------|----------|----------|------|------|------|------|------|------|------|------|------|----------|----------|------|----------|----------|
| 245020_21 | petA           | cytochrome f                            | cytochrome c                            | 614  | 819  | 625  | 1130 | 988  | 1037 | 686  | 1052 | 0.65 | 0.009622 | 627      | 689  | 634  | 945  | 641  | 710  | 646  | 560  | 650  | 700  | 0.93     | 0.589838 | 765  | 0.85     | 0.286923 |
| 245021_21 | psbJ           | PSII component                          | PSII component                          | 635  | 988  | 831  | 1007 | 1170 | 842  | 818  | 1006 | 0.81 | 0.247381 | 617      | 627  | 692  | 894  | 648  | 612  | 733  | 749  | 645  | 727  | 0.89     | 0.270015 | 718  | 0.90     | 0.472266 |
| 245022_21 | psbL           | PSII L protein                          | PSII L protein                          | 184  | 273  | 245  | 293  | 314  | 243  | 234  | 283  | 0.83 | 0.219455 | 154      | 190  | 169  | 217  | 172  | 170  | 191  | 189  | 171  | 188  | 0.91     | 0.262532 | 188  | 0.92     | 0.457175 |
| 244963_21 | psbF           | PSII cytochrome b559                    | PSII cytochrome b559                    | 677  | 1008 | 1006 | 1136 | 1003 | 860  | 873  | 1130 | 0.77 | 0.143644 | 827      | 947  | 817  | 918  | 845  | 937  | 918  | 845  | 937  | 918  | 0.93     | 0.416982 | 993  | 0.97     | 0.174610 |
| 244964_21 | psbE           | PSII cytochrome b559                    | PSII cytochrome b559                    | 249  | 379  | 247  | 386  | 476  | 371  | 305  | 411  | 0.74 | 0.105418 | 335      | 339  | 305  | 451  | 351  | 352  | 324  | 304  | 326  | 356  | 0.92     | 0.416763 | 385  | 0.85     | 0.166211 |
| 244965_21 | ORF31          | hypothetical protein                    | hypothetical protein                    | 73   | 108  | 77   | 88   | 95   | 70   | 86   | 84   | 1.02 | 0.890992 | 24       | 23   | 30   | 29   | 21   | 22   | 22   | 23   | 26   | 23   | 1.11     | 0.314488 | 24   | 1.08     | 0.575061 |
| 244966_21 | petG           | cytochrome b6-f complex, subunit V      | cytochrome b6-f complex, subunit V      | 240  | 466  | 357  | 308  | 482  | 320  | 354  | 370  | 0.96 | 0.884012 | 33       | 41   | 27   | 28   | 24   | 24   | 24   | 28   | 34   | 25   | 1.33     | 0.031990 | 26   | 1.34     | 0.097425 |
| 244967_21 | psbJ           | PSII L protein                          | PSII L protein                          | 370  | 518  | 372  | 534  | 481  | 357  | 318  | 485  | 0.71 | 0.363040 | 645      | 486  | 541  | 815  | 615  | 858  | 743  | 595  | 741  | 0.75 | 0.104602 | 701      | 0.80 | 0.160585 |          |
| 244968_21 | rp33           | ribosomal protein L33                   | ribosomal protein L33                   | 680  | 1128 | 669  | 1010 | 1059 | 788  | 828  | 952  | 0.87 | 0.503592 | 1153     | 1295 | 1345 | 1751 | 1288 | 1319 | 1611 | 1601 | 1264 | 1510 | 0.84     | 0.108596 | 1446 | 0.87     | 0.329015 |
| 244969_21 | rsp18          | ribosomal protein S18                   | ribosomal protein S18                   | 100  | 152  | 113  | 159  | 169  | 125  | 122  | 151  | 0.80 | 0.226138 | 121      | 95   | 140  | 177  | 120  | 140  | 169  | 177  | 119  | 157  | 0.76     | 0.089010 | 146  | 0.82     | 0.275715 |
| 244970_21 | rp20           | ribosomal protein L20                   | ribosomal protein L20                   | 89   | 130  | 92   | 111  | 108  | 123  | 104  | 114  | 0.91 | 0.493677 | 40       | 42   | 39   | 45   | 40   | 35   | 50   | 47   | 41   | 43   | 0.93     | 0.470001 | 40   | 1.02     | 0.855441 |
| 244971_21 | clpP           | ATP-dependent protease subunit          | non-LTR retrotransposon family (LINE)   | 361  | 409  | 334  | 492  | 436  | 517  | 368  | 482  | 0.76 | 0.246551 | 409      | 322  | 367  | 504  | 385  | 381  | 321  | 322  | 386  | 385  | 1.00     | 0.384107 | 427  | 0.90     | 0.520487 |
| 244972_21 | psbB           | PSII 47KDa protein                      | PSII 47KDa protein                      | 452  | 651  | 410  | 656  | 638  | 530  | 544  | 711  | 0.71 | 0.102380 | 580      | 512  | 525  | 688  | 464  | 419  | 439  | 407  | 539  | 483  | 1.12     | 0.463096 | 524  | 1.03     | 0.866290 |
| 244973_21 | psbT           | PSII T protein                          | PSII T protein                          | 22   | 31   | 18   | 33   | 26   | 23   | 24   | 27   | 0.87 | 0.476595 | 10       | 18   | 12   | 15   | 18   | 15   | 16   | 12   | 13   | 15   | 0.90     | 0.508173 | 16   | 0.85     | 0.417015 |
| 244974_21 | psbN           | PSII low MW protein                     | PSII low MW protein                     | 40   | 53   | 43   | 52   | 45   | 51   | 45   | 49   | 0.92 | 0.399227 | 31       | 31   | 38   | 44   | 40   | 37   | 40   | 35   | 33   | 39   | 0.84     | 0.048851 | 41   | 0.82     | 0.061602 |
| 244975_21 | psbH           | PSII 10KDa phosphoprotein               | PSII 10KDa phosphoprotein               | 171  | 257  | 128  | 279  | 278  | 301  | 186  | 286  | 0.55 | 0.060939 | 99       | 89   | 91   | 131  | 79   | 86   | 86   | 80   | 93   | 93   | 1.01     | 0.962555 | 99   | 0.94     | 0.746843 |
| 244976_21 | petB           | cytochrome b6                           | cytochrome b6                           | 452  | 651  | 410  | 656  | 638  | 530  | 544  | 711  | 0.71 | 0.102380 | 580      | 512  | 525  | 688  | 464  | 419  | 439  | 407  | 539  | 483  | 1.12     | 0.463096 | 524  | 1.03     | 0.866290 |
| 244977_21 | petD           | cytochrome b/f                          | cytochrome b/f                          | 89   | 132  | 135  | 97   | 172  | 109  | 119  | 126  | 0.94 | 0.810627 | 36       | 32   | 34   | 32   | 26   | 32   | 33   | 34   | 30   | 30   | 1.14     | 0.113059 | 28   | 1.23     | 0.047092 |
| 244978_21 | rpoA           | RNA polymerase alpha subunit            | RNA polymerase alpha subunit            | 2328 | 2967 | 2636 | 2938 | 3093 | 2446 | 2643 | 2826 | 0.94 | 0.535015 | 2008     | 2090 | 2387 | 2638 | 2276 | 2136 | 2487 | 2651 | 2162 | 2438 | 0.89     | 0.133525 | 2350 | 0.92     | 0.374979 |
| 244979_21 | psp11          | ribosomal protein S11                   | ribosomal protein S11                   | 1289 | 2016 | 1723 | 1842 | 1870 | 1501 | 1676 | 1737 | 0.96 | 0.812079 | 1287     | 1438 | 1456 | 1865 | 1471 | 1230 | 1473 | 1413 | 1394 | 1490 | 0.94     | 0.525920 | 1522 | 0.92     | 0.541815 |
| 244980_21 | rp36           | ribosomal protein L36                   | ribosomal protein L36                   | 407  | 671  | 463  | 651  | 630  | 483  | 514  | 589  | 0.87 | 0.485434 | 301      | 329  | 316  | 461  | 328  | 311  | 310  | 334  | 315  | 349  | 0.90     | 0.411921 | 367  | 0.86     | 0.342728 |
| 244981_21 | rsp8           | ribosomal protein S8                    | ribosomal protein S8                    | 528  | 811  | 375  | 905  | 856  | 677  | 571  | 813  | 0.70 | 0.171876 | 202      | 142  | 196  | 240  | 176  | 168  | 218  | 206  | 180  | 202  | 0.89     | 0.376469 | 195  | 0.92     | 0.645671 |
| 244982_21 | rp14           | ribosomal protein L14                   | ribosomal protein L14                   | 318  | 460  | 245  | 504  | 483  | 440  | 341  | 475  | 0.72 | 0.111289 | 132      | 130  | 179  | 202  | 131  | 122  | 129  | 137  | 147  | 144  | 1.02     | 0.906129 | 152  | 0.97     | 0.884686 |
| 244983_21 | rrf16.chloro   | ribosomal protein L16                   | ribosomal protein L16                   | 266  | 381  | 189  | 432  | 426  | 375  | 278  | 411  | 0.68 | 0.086675 | 219      | 161  | 218  | 259  | 177  | 189  | 150  | 139  | 200  | 183  | 1.09     | 0.610333 | 208  | 0.96     | 0.802455 |
| 244984_21 | rrs33.chloro   | ribosomal protein S3                    | ribosomal protein S3                    | 845  | 1441 | 1366 | 1530 | 1494 | 1208 | 1250 | 1411 | 0.89 | 0.434743 | 726      | 626  | 775  | 1013 | 755  | 690  | 970  | 710  | 882  | 81   | 1.221111 | 816      | 0.87 | 0.389568 |          |
| 244985_21 | rp22           | ribosomal protein L22                   | ribosomal protein L22                   | 532  | 876  | 721  | 964  | 952  | 742  | 710  | 886  | 0.80 | 0.223944 | 363      | 316  | 368  | 522  | 384  | 365  | 411  | 382  | 345  | 413  | 0.83     | 0.130505 | 424  | 0.81     | 0.198162 |
| 244986_21 | rsp19          | ribosomal protein S19                   | ribosomal protein S19                   | 1056 | 1357 | 927  | 1404 | 1384 | 1255 | 1114 | 1349 | 0.83 | 0.157208 | 171      | 736  | 1126 | 1230 | 1136 | 1040 | 1112 | 1086 | 1011 | 1121 | 0.90     | 0.354216 | 1136 | 0.89     | 0.449810 |
| 244987_21 | rrp12_1_chloro | ribosomal protein L2                    | ribosomal protein L2                    | 1870 | 2557 | 2021 | 2501 | 2501 | 2399 | 2149 | 2467 | 0.87 | 0.207036 | 2521     | 2468 | 2489 | 2912 | 2437 | 2269 | 2600 | 2595 | 2493 | 2563 | 0.97     | 0.642142 | 2539 | 0.88     | 0.822534 |
| 244988_21 | rp23.1         | ribosomal protein L23                   | ribosomal protein L23                   | 611  | 804  | 529  | 857  | 852  | 773  | 648  | 827  | 0.78 | 0.105749 | 673      | 777  | 637  | 954  | 642  | 701  | 633  | 572  | 686  | 700  | 0.99     | 0.962412 | 766  | 0.91     | 0.540802 |
| 244989_21 | ycf2.1         | hypothetical protein                    | hypothetical protein                    | 39   | 56   | 45   | 56   | 48   | 39   | 56   | 48   | 0.56 | 0.432458 | 26       | 33   | 32   | 31   | 32   | 31   | 32   | 31   | 32   | 31   | 1.09     | 0.939463 | 33   | 0.98     | 0.855506 |
| 244990_21 | orf77.1        | hypothetical protein                    | hypothetical protein                    | 41   | 69   | 56   | 45   | 56   | 48   | 39   | 56   | 0.50 | 0.110    | 0.056969 | 28   | 37   | 32   | 29   | 21   | 22   | 36   | 32   | 28   | 1.15     | 0.370260 | 24   | 1.34     | 0.086415 |
| 244991_21 | ndhB.1         | NADH dehydrogenase ND2                  | NADH dehydrogenase ND2                  | 46   | 59   | 47   | 49   | 63   | 52   | 51   | 55   | 0.93 | 0.548968 | 29       | 42   | 41   | 38   | 30   | 31   | 40   | 33   | 37   | 34   | 1.10     | 0.455382 | 33   | 1.14     | 0.409744 |
| 244992_21 | psf.1_chloro   | ribosomal protein S7                    | ribosomal protein S7                    | 998  | 1289 | 978  | 1392 | 1158 | 1334 | 1088 | 1295 | 0.84 | 0.167893 | 1418     | 1406 | 1432 | 1872 | 1333 | 1308 | 1401 | 1424 | 1419 | 1468 | 0.97     | 0.734666 | 1504 | 0.94     | 0.865848 |
| 244993_21 | ycf1.1         | hypothetical protein                    | expressed protein                       | 334  | 472  | 329  | 491  | 485  | 489  | 378  | 489  | 0.77 | 0.078110 | 159      | 165  | 203  | 242  | 168  | 174  | 181  | 175  | 187  | 194  | 0.94     | 0.610336 | 193  | 0.91     | 0.575075 |
| 244994_21 | ndhF           | NADH dehydrogenase ND5                  | pseudogene, NADH dehydrogenase          | 48   | 55   | 56   | 47   | 52   | 53   | 53   | 51   | 1.05 | 0.512211 | 37       | 37   | 52   | 33   | 36   | 41   | 36   | 44   | 42   | 38   | 1.11     | 0.394822 | 37   | 1.15     | 0.376798 |
| 244995_21 | rp32           | ribosomal protein L32                   | ribosomal protein L32                   | 542  | 722  | 606  | 770  | 631  | 765  | 623  | 722  | 0.86 | 0.227758 | 414      | 421  | 440  | 590  | 358  | 353  | 659  | 536  | 425  | 499  | 0.85     | 0.025958 | 434  | 0.98     | 0.915411 |
| 244996_21 | ycf5           | hypothetical protein                    | hypothetical protein                    | 345  | 509  | 304  | 511  | 454  | 392  | 386  | 452  | 0.85 | 0.408177 | 402      | 316  | 425  | 531  | 381  | 346  | 490  | 464  | 381  | 443  | 0.86     | 0.280622 | 419  | 0.91     | 0.592027 |
| 244997_21 | ndhD           | NADH dehydrogenase ND4                  | NADH dehydrogenase ND4                  | 111  | 124  | 146  | 154  | 128  | 137  | 137  | 137  | 0.53 | 0.049421 | 37       | 36   | 36   | 42   | 31   | 30   | 38   | 36   | 36   | 36   | 1.02     | 0.785272 | 34   | 1.08     | 0.679268 |
| 244998_21 | psaC           | PSI 9KDa protein                        | PSI 9KDa protein                        | 57   | 50   | 71   | 43   | 60   | 59   | 59   | 54   | 1.09 | 0.592379 | 21       | 19   | 23   | 21   | 16   | 18   | 21   | 26   | 21   | 20   | 1.03     | 0.801335 | 18   | 1.14     | 0.281505 |
| 244999_21 | ndhE           | NADH dehydrogenase ND4L                 | NADH dehydrogenase ND4L                 | 68   | 95   | 85   | 81   | 86   | 83   | 82   | 83   | 0.99 | 0.897257 | 33       | 33   | 36   | 34   | 20   | 24   | 27   | 26   | 34   | 26   | 1.29     | 0.052460 | 26   | 1.30     | 0.144288 |
| 244999_21 | ndhG           | NADH dehydrogenase ND6                  | NADH dehydrogenase ND6                  | 88   | 101  | 106  | 81   | 86   | 109  | 99   | 92   | 1.07 | 0.566853 | 55       | 40   | 54   | 48   | 43   | 38   | 56   | 44   | 49   | 46   | 1.08     | 0.542946 | 43   | 1.15     | 0.328168 |
| 244999_21 | ndhI           | NADH dehydrogenase subunit              | NADH dehydrogenase subunit              | 545  | 839  | 489  | 892  | 806  | 837  | 627  | 845  | 0.74 | 0.117894 | 629      | 481  | 627  | 772  | 526  | 532  | 546  | 509  | 579  | 577  | 1.00     | 0.983716 | 610  | 0.95     | 0.756709 |
| 244999_21 | ndhA           | NADH dehydrogenase ND1                  | NADH dehydrogenase ND1                  | 60   | 76   | 54   | 106  | 104  | 120  | 83   | 109  | 0.77 | 0.274842 | 51       | 59   | 45   | 62   | 46   | 51   | 62   | 52   | 52   | 52   | 1.03     | 0.729889 | 59   | 1.00     | 0.965193 |
| 244999_21 | ndhH           | NADH dehydrogenase 49KDa protein        | NADH dehydrogenase 49KDa protein        | 34   | 45   | 36   | 34   | 44   | 44   | 38   | 40   | 0.95 | 0.687999 | 25       | 26   | 33   | 35   | 26   | 22   | 25   | 29   | 28   | 27   | 1.03     | 0.811494 | 28   | 1.02     | 0.906759 |
| 244999_21 | rsp15          | ribosomal protein S15                   | ribosomal protein S15                   | 61   | 104  | 91   | 91   | 80   | 73   | 89   | 81   | 1.09 | 0.535323 | 28       | 26   | 32   | 26   | 26   | 25   | 27   | 23   | 29   | 25   | 1.13     | 0.093338 | 26   | 1.12     | 0.201941 |
| 244999_21 | rrp12.1        | ribosomal protein S12 (trans-solice car | ribosomal protein S12 (trans-solice car | 64   | 74   | 45   | 76   | 71   | 81   | 61   | 76   | 0.80 | 0.172958 | 115      | 138  | 103  | 153  | 100  | 96   | 84   | 87   | 118  | 106  | 1.12     | 0.500997 | 116  | 1.02     | 0.917426 |
| 244999_21 | rrp12.2        | ribosomal protein S12 (trans-solice car | ribosomal protein S12 (trans-solice car | 180  | 251  | 141  | 259  | 216  | 259  | 141  | 259  | 0.78 | 0.143056 | 379      | 415  | 397  | 560  | 327  | 343  | 345  | 3    |      |      |          |          |      |          |          |

|             |                |                                                                                       |                                                                                       |     |     |     |     |     |     |     |      |          |          |     |     |     |     |     |      |          |          |     |      |          |          |          |          |          |          |
|-------------|----------------|---------------------------------------------------------------------------------------|---------------------------------------------------------------------------------------|-----|-----|-----|-----|-----|-----|-----|------|----------|----------|-----|-----|-----|-----|-----|------|----------|----------|-----|------|----------|----------|----------|----------|----------|----------|
| 257318_at   | orf262         | hypothetical protein                                                                  | expressed protein                                                                     | 17  | 22  | 26  | 26  | 25  | 27  | 22  | 26   | 0.84     | 0.190852 | 21  | 21  | 25  | 19  | 20  | 18   | 26       | 20       | 22  | 21   | 1.08     | 0.460311 | 19       | 1.17     | 0.067605 |          |
| 257319_at   | orf105a        | hypothetical protein                                                                  | hypothetical protein                                                                  | 87  | 90  | 120 | 118 | 146 | 128 | 97  | 131  | 0.75     | 0.081067 | 60  | 57  | 77  | 72  | 55  | 66   | 61       | 69       | 65  | 65   | 1.00     | 0.980080 | 64       | 1.01     | 0.952180 |          |
| 257320_at   | orf251         | hypothetical protein                                                                  | hypothetical protein                                                                  | 26  | 33  | 35  | 33  | 35  | 34  | 31  | 34   | 0.92     | 0.387365 | 21  | 26  | 29  | 31  | 27  | 18   | 31       | 22       | 25  | 26   | 0.98     | 0.902216 | 25       | 1.00     | 0.987624 |          |
| 257321_at   | orf108f        | hypothetical protein                                                                  | hypothetical protein                                                                  | 121 | 119 | 138 | 139 | 133 | 129 | 134 | 137  | 0.95     | 0.448013 | 115 | 112 | 154 | 107 | 104 | 94   | 112      | 119      | 127 | 105  | 1.21     | 0.090301 | 101      | 1.05     | 0.143701 |          |
| 257322_at   | orf111b        | hypothetical protein                                                                  | hypothetical protein                                                                  | 18  | 20  | 29  | 30  | 31  | 22  | 30  | 27   | 0.74     | 0.069376 | 19  | 22  | 26  | 20  | 22  | 31   | 26       | 22       | 24  | 24   | 0.94     | 0.674677 | 21       | 1.08     | 0.469280 |          |
| 257323_at   | orf294         | hypothetical protein                                                                  | ATP synthase chain, mitochondria                                                      | 13  | 19  | 17  | 19  | 18  | 17  | 16  | 18   | 0.89     | 0.333987 | 8   | 12  | 11  | 15  | 10  | 9    | 14       | 8        | 10  | 11   | 0.94     | 0.747857 | 11       | 0.93     | 0.785209 |          |
| 257324_at   | orf101b        | hypothetical protein                                                                  | hypothetical protein                                                                  | 49  | 62  | 59  | 69  | 72  | 64  | 57  | 68   | 0.84     | 0.066472 | 44  | 44  | 53  | 61  | 39  | 52   | 56       | 47       | 47  | 51   | 0.92     | 0.487794 | 51       | 0.93     | 0.629562 |          |
| 257325_at   | orf113         | hypothetical protein                                                                  | hypothetical protein                                                                  | 32  | 33  | 43  | 43  | 46  | 42  | 44  | 39   | 0.85     | 0.050267 | 46  | 45  | 57  | 63  | 49  | 52   | 47       | 51       | 49  | 52   | 1.01     | 0.911425 | 51       | 0.93     | 0.805444 |          |
| 257326_at   | orf145b        | hypothetical protein                                                                  | non-LTR retrotransposon family (LINE)                                                 | 21  | 28  | 24  | 28  | 31  | 27  | 24  | 29   | 0.84     | 0.130890 | 18  | 23  | 27  | 22  | 19  | 20   | 25       | 21       | 23  | 22   | 1.06     | 0.601221 | 21       | 1.11     | 0.465440 |          |
| 257327_at   | orf100c        | hypothetical protein                                                                  | hypothetical protein                                                                  | 28  | 33  | 34  | 35  | 39  | 34  | 31  | 36   | 0.88     | 0.168581 | 25  | 30  | 30  | 27  | 24  | 26   | 23       | 27       | 29  | 25   | 1.14     | 0.083959 | 25       | 1.13     | 0.174295 |          |
| 257328_s_at | orf102         | hypothetical protein                                                                  | non-LTR retrotransposon family (LINE)                                                 | 28  | 39  | 38  | 39  | 46  | 42  | 35  | 42   | 0.82     | 0.139734 | 23  | 27  | 38  | 26  | 25  | 22   | 30       | 29       | 29  | 27   | 1.10     | 0.506285 | 24       | 1.19     | 0.360573 |          |
| 257329_at   | orf205         | hypothetical protein                                                                  | hypothetical protein                                                                  | 27  | 32  | 33  | 32  | 35  | 31  | 32  | 0.95 | 0.630486 | 23       | 27  | 29  | 25  | 25  | 25  | 25   | 29       | 26       | 27  | 26   | 1.01     | 0.822120 | 25       | 1.25     | 0.522961 |          |
| 257330_at   | orf111c        | hypothetical protein                                                                  | hypothetical protein                                                                  | 21  | 22  | 22  | 23  | 24  | 23  | 23  | 23   | 1.01     | 0.928447 | 19  | 19  | 23  | 21  | 19  | 17   | 24       | 19       | 20  | 20   | 1.02     | 0.877243 | 19       | 1.07     | 0.526909 |          |
| 257331_at   | orf107h        | hypothetical protein                                                                  | hypothetical protein                                                                  | 10  | 12  | 9   | 7   | 7   | 9   | 10  | 8    | 1.32     | 0.073103 | 12  | 13  | 12  | 13  | 15  | 10   | 9        | 7        | 12  | 11   | 1.10     | 0.587014 | 13       | 0.94     | 0.602160 |          |
| 257332_at   | orf145c        | hypothetical protein                                                                  | hypothetical protein                                                                  | 41  | 43  | 46  | 41  | 52  | 43  | 43  | 45   | 0.96     | 0.162322 | 39  | 40  | 49  | 40  | 37  | 33   | 45       | 44       | 43  | 40   | 1.08     | 0.418557 | 36       | 1.17     | 0.153021 |          |
| 257333_at   | cox1           | cytochrome c oxidase subunit 1                                                        | cytochrome c oxidase subunit 1                                                        | 86  | 99  | 118 | 149 | 134 | 117 | 101 | 133  | 0.76     | 0.068071 | 88  | 91  | 106 | 118 | 96  | 98   | 104      | 107      | 95  | 105  | 0.91     | 0.186712 | 104      | 0.91     | 0.364581 |          |
| 257334_at   | orf111d        | hypothetical protein                                                                  | hypothetical protein                                                                  | 88  | 145 | 90  | 140 | 138 | 130 | 136 | 97   | 0.203467 | 92       | 108 | 109 | 158 | 121 | 108 | 126  | 112      | 103      | 125 | 0.83 | 0.142196 | 128      | 0.80     | 0.190465 |          |          |
| 257335_at   | orf105b        | hypothetical protein                                                                  | hypothetical protein                                                                  | 44  | 75  | 50  | 56  | 68  | 65  | 56  | 63   | 0.89     | 0.534644 | 35  | 32  | 36  | 35  | 33  | 26   | 40       | 39       | 34  | 35   | 0.99     | 0.934946 | 31       | 1.10     | 0.348490 |          |
| 257336_at   | orf204         | hypothetical protein                                                                  | hypothetical protein                                                                  | 44  | 54  | 50  | 63  | 66  | 50  | 49  | 60   | 0.83     | 0.142969 | 54  | 40  | 47  | 71  | 46  | 49   | 72       | 71       | 47  | 62   | 0.76     | 0.138103 | 55       | 0.86     | 0.426689 |          |
| 257337_s_at | naef5.1        | NADH dehydrogenase subunit 5 (naef5)                                                  | NADH dehydrogenase subunit 5 (naef5)                                                  | 37  | 48  | 46  | 54  | 51  | 51  | 43  | 52   | 0.83     | 0.075870 | 35  | 39  | 38  | 40  | 33  | 28   | 34       | 33       | 37  | 33   | 1.11     | 0.208179 | 33       | 1.11     | 0.353553 |          |
| 257338_s_at | naef5.1        | NADH dehydrogenase subunit 5 (naef5)                                                  | NADH dehydrogenase subunit 5 (naef5)                                                  | 70  | 52  | 133 | 108 | 101 | 93  | 98  | 101  | 0.97     | 0.890504 | 56  | 54  | 65  | 60  | 43  | 53   | 73       | 70       | 58  | 60   | 0.97     | 0.816510 | 52       | 1.11     | 0.370596 |          |
| 257339_s_at | mitochondria.1 | ATP synthase subunit 9                                                                | H+-transporting two-sector ATPase. C s                                                | 168 | 249 | 188 | 334 | 286 | 299 | 202 | 306  | 0.66     | 0.221151 | 317 | 332 | 318 | 497 | 318 | 301  | 285      | 281      | 322 | 336  | 0.96     | 0.803698 | 372      | 0.87     | 0.471890 |          |
| 257340_at   | At2g10760      | osuedoene, retroelement col poliovir copic-like retrotransposon family                | osuedoene, retroelement col poliovir copic-like retrotransposon family                | 38  | 54  | 58  | 58  | 65  | 56  | 50  | 60   | 0.84     | 0.224348 | 38  | 42  | 51  | 45  | 41  | 42   | 46       | 39       | 44  | 42   | 1.03     | 0.749376 | 43       | 1.03     | 0.799507 |          |
| 257341_at   | At2g10400      | osuedoene, Mutator-like transposase Mutator-like transposase family /// oseuc         | osuedoene, Mutator-like transposase Mutator-like transposase family /// oseuc         | 11  | 11  | 16  | 20  | 14  | 17  | 14  | 17   | 0.79     | 0.150172 | 9   | 13  | 17  | 17  | 11  | 10   | 16       | 13       | 13  | 13   | 0.98     | 0.919059 | 12       | 1.05     | 0.860485 |          |
| 257342_at   | At1g42055      | osuedoene, putative polyprotein siml avovs-like retrotransposon family (Atheta        | osuedoene, putative polyprotein siml avovs-like retrotransposon family (Atheta        | 67  | 109 | 122 | 122 | 154 | 118 | 100 | 131  | 0.76     | 0.188587 | 64  | 64  | 67  | 76  | 63  | 66   | 77       | 70       | 65  | 70   | 0.92     | 0.199439 | 66       | 0.95     | 0.440313 |          |
| 257343_s_at | At1g4967       | osuedoene, polyprotein similar to GB copia-like retrotransposon family                | osuedoene, polyprotein similar to GB copia-like retrotransposon family                | 19  | 17  | 14  | 14  | 21  | 14  | 19  | 16   | 1.16     | 0.392054 | 11  | 10  | 14  | 12  | 16  | 13   | 12       | 13       | 12  | 13   | 0.90     | 0.304076 | 13       | 0.87     | 0.404090 |          |
| 257344_s_at | At1g45070      | osuedoene, putative mutator-like tra                                                  | osuedoene, putative mutator-like tra                                                  | 19  | 17  | 23  | 17  | 18  | 24  | 20  | 20   | 0.99     | 0.961881 | 21  | 17  | 21  | 17  | 15  | 15   | 14       | 19       | 20  | 16   | 1.24     | 0.036573 | 16       | 1.27     | 0.039954 |          |
| 257345_s_at | At3g33066      | osuedoene, putative mutator-like tra                                                  | osuedoene, putative mutator-like tra                                                  | 20  | 29  | 24  | 21  | 28  | 27  | 25  | 26   | 0.96     | 0.806158 | 19  | 23  | 29  | 21  | 18  | 21   | 22       | 21       | 24  | 21   | 1.15     | 0.210206 | 20       | 1.18     | 0.274260 |          |
| 257346_at   | At3g30846      | osuedoene, putative retroelement siml avovs-like retrotransposon family /// avovs     | osuedoene, putative retroelement siml avovs-like retrotransposon family /// avovs     | 19  | 18  | 24  | 20  | 29  | 22  | 20  | 24   | 0.85     | 0.327999 | 17  | 15  | 18  | 17  | 15  | 13   | 19       | 20       | 17  | 17   | 0.99     | 0.913598 | 15       | 1.12     | 0.248306 |          |
| 257347_at   | At2g29792      | osuedoene, gene, sIKVET7.6                                                            | osuedoene, gene, sIKVET7.6                                                            | 31  | 29  | 31  | 34  | 37  | 36  | 33  | 39   | 0.89     | 0.224162 | 22  | 16  | 22  | 22  | 29  | 25   | 24       | 21       | 22  | 24   | 0.89     | 0.457789 | 24       | 0.92     | 0.652091 |          |
| 257348_at   | At2g42140      | hypothetical protein predicted by geneq VQ motif-containing protein                   | hypothetical protein predicted by geneq VQ motif-containing protein                   | 19  | 14  | 11  | 12  | 11  | 12  | 12  | 12   | 1.06     | 0.590399 | 11  | 14  | 10  | 10  | 9   | 11   | 13       | 9        | 11  | 10   | 1.09     | 0.455525 | 10       | 1.11     | 0.407353 |          |
| 257349_s_at | At2g30630      | unknown protein                                                                       | expressed protein                                                                     | 20  | 19  | 19  | 22  | 33  | 21  | 19  | 25   | 0.75     | 0.188257 | 14  | 22  | 13  | 20  | 12  | 17   | 25       | 25       | 17  | 19   | 0.92     | 0.644428 | 21       | 0.92     | 0.703087 |          |
| 257350_x_at | At2g18040      | hypothetical protein predicted by geneq rapid alkalization factor (RALF) family       | hypothetical protein predicted by geneq rapid alkalization factor (RALF) family       | 9   | 11  | 15  | 16  | 16  | 16  | 12  | 16   | 0.73     | 0.076534 | 11  | 12  | 15  | 12  | 12  | 13   | 16       | 9        | 13  | 12   | 1.02     | 0.900898 | 12       | 1.03     | 0.790308 |          |
| 257351_at   | At2g33820      | putative mitochondrial carrier protein                                                | mitochondrial substrate carrier family or                                             | 194 | 312 | 332 | 298 | 361 | 261 | 279 | 307  | 0.91     | 0.624344 | 273 | 261 | 227 | 312 | 272 | 266  | 281      | 241      | 273 | 268  | 0.88     | 0.000511 | 281      | 0.86     | 0.087636 |          |
| 257352_at   | At2g34900      | putative RING3 protein                                                                | DNA-binding bromodomain-containing o                                                  | 175 | 222 | 281 | 252 | 273 | 249 | 226 | 258  | 0.88     | 0.367701 | 188 | 230 | 222 | 282 | 226 | 202  | 243      | 219      | 213 | 235  | 0.91     | 0.337780 | 237      | 0.90     | 0.431190 |          |
| 257353_at   | At2g23050      | hypothetical protein predicted by geneq photochemical-responsive NPH3 family or       | hypothetical protein predicted by geneq photochemical-responsive NPH3 family or       | 40  | 42  | 33  | 53  | 60  | 54  | 38  | 55   | 0.69     | 0.007249 | 28  | 30  | 35  | 53  | 42  | 36   | 47       | 40       | 31  | 44   | 0.72     | 0.026607 | 44       | 0.72     | 0.082752 |          |
| 257354_x_at | At2g23480      | hypothetical protein predicted by geneq hypothetical protein /// hypothetical protein | hypothetical protein predicted by geneq hypothetical protein /// hypothetical protein | 28  | 40  | 45  | 41  | 62  | 41  | 38  | 48   | 0.79     | 0.230913 | 25  | 25  | 28  | 29  | 25  | 28   | 25       | 25       | 26  | 26   | 0.99     | 0.849323 | 27       | 0.95     | 0.430034 |          |
| 257355_at   | At2g38150      | hypothetical protein predicted by geneq alpha 1.4-glycosyltransferase family or       | hypothetical protein predicted by geneq alpha 1.4-glycosyltransferase family or       | 18  | 19  | 21  | 24  | 24  | 23  | 19  | 24   | 0.82     | 0.001896 | 14  | 13  | 25  | 22  | 17  | 19   | 21       | 21       | 20  | 1.07 | 0.652843 | 19       | 1.09     | 0.652091 |          |          |
| 257356_s_at | At2g32490      | hypothetical protein predicted by geneq 3'-5' exonuclease domain-containing pnc       | hypothetical protein predicted by geneq 3'-5' exonuclease domain-containing pnc       | 29  | 35  | 40  | 33  | 42  | 33  | 35  | 36   | 0.96     | 0.742828 | 37  | 24  | 32  | 33  | 35  | 39   | 34       | 31       | 35  | 0.89 | 0.298329 | 34       | 0.93     | 0.571406 |          |          |
| 257357_at   | At2g41050      | hypothetical protein predicted by geneq PQ-loop repeat family protein / transfer      | hypothetical protein predicted by geneq PQ-loop repeat family protein / transfer      | 80  | 89  | 100 | 114 | 142 | 110 | 90  | 122  | 0.74     | 0.051024 | 83  | 82  | 72  | 120 | 99  | 88   | 87       | 82       | 79  | 95   | 0.83     | 0.135380 | 102      | 0.77     | 0.084623 |          |
| 257358_at   | At2g40990      | unknown protein predicted by gencan zinc finger (DHC type) family protein             | unknown protein predicted by gencan zinc finger (DHC type) family protein             | 21  | 24  | 25  | 21  | 24  | 21  | 23  | 22   | 1.05     | 0.540745 | 16  | 21  | 20  | 13  | 10  | 19   | 18       | 19       | 20  | 19   | 16       | 1.18     | 0.377080 | 14       | 1.37     | 0.176729 |
| 257359_x_at | At2g34280      | putative protein kinase containing a crole protein kinase family protein              | putative protein kinase containing a crole protein kinase family protein              | 43  | 46  | 52  | 53  | 55  | 52  | 47  | 53   | 0.88     | 0.070071 | 30  | 40  | 46  | 38  | 35  | 38   | 36       | 38       | 37  | 1.05 | 0.616729 | 37       | 1.04     | 0.741551 |          |          |
| 257360_at   | At2g36240      | unknown protein                                                                       | RNA polymerase I specific transposon                                                  | 23  | 28  | 30  | 31  | 29  | 30  | 28  | 29   | 0.94     | 0.603201 | 22  | 28  | 24  | 28  | 24  | 24   | 1.07     | 0.540489 | 23  | 24   | 1.07     | 0.540489 | 23       | 24       | 1.07     | 0.540489 |
| 257361_at   | At2g07740      | putative Ta1-like non-LTR retroelement zinc knuckle (CCHC-type) family protein        | putative Ta1-like non-LTR retroelement zinc knuckle (CCHC-type) family protein        | 16  | 17  | 25  | 23  | 21  | 22  | 20  | 22   | 0.90     | 0.488486 | 14  | 15  | 19  | 16  | 13  | 16   | 10       | 14       | 17  | 16   | 1.03     | 0.798192 | 15       | 1.03     | 0.811516 |          |
| 257362_at   | At2g45840      | hypothetical protein predicted by geneq expressed protein                             | hypothetical protein predicted by geneq expressed protein                             | 71  | 89  | 80  | 88  | 85  | 78  | 80  | 83   | 0.96     | 0.601605 | 95  | 95  | 89  | 76  | 62  | 62   | 83       | 89       | 93  | 74   | 1.25     | 0.043829 | 67       | 1.39     | 0.006590 |          |
| 257363_at   | At2g45760      | hypothetical protein predicted by geneq BDN1-associated protein (BAP1)-related        | hypothetical protein predicted by geneq BDN1-associated protein (BAP1)-related        | 44  | 57  | 71  | 66  | 77  | 64  | 57  | 69   | 0.83     | 0.249953 | 34  | 33  | 44  | 38  | 47  | 42   | 35       | 42       | 37  | 41   | 0.91     | 0.370792 | 42       | 0.88     | 0.327671 |          |
| 257364_at   | At2g45040      | hypothetical protein predicted by geneq hypothetical protein                          | hypothetical protein predicted by geneq hypothetical protein                          | 14  | 25  | 23  | 23  | 31  | 26  | 29  | 27   | 0.70     | 0.118490 | 19  | 16  | 22  | 18  | 20  | 0.90 | 0.154384 | 20       | 18  | 20   | 1.12     | 0.027126 | 20       | 1.05     | 0.027126 |          |
| 257365_x_at | At2g26020      | putative antifungal protein                                                           | plant defensin-fusion protein, putative (F                                            | 55  | 64  | 73  | 479 | 77  | 58  |     |      |          |          |     |     |     |     |     |      |          |          |     |      |          |          |          |          |          |          |

|             |           |                                                                                      |                                             |     |     |     |     |     |     |     |      |          |          |     |     |     |     |     |     |     |     |     |      |          |          |          |          |          |          |
|-------------|-----------|--------------------------------------------------------------------------------------|---------------------------------------------|-----|-----|-----|-----|-----|-----|-----|------|----------|----------|-----|-----|-----|-----|-----|-----|-----|-----|-----|------|----------|----------|----------|----------|----------|----------|
| 257416_at   | At2g17750 | unknown protein                                                                      | hypothetical protein                        | 17  | 21  | 21  | 21  | 26  | 28  | 20  | 25   | 0.79     | 0.114617 | 15  | 17  | 22  | 18  | 15  | 17  | 20  | 16  | 18  | 17   | 1.04     | 0.726416 | 16       | 1.08     | 0.544939 |          |
| 257417_at   | At1g10110 | hypothetical protein predicted by gensec F-box family protein                        |                                             | 150 | 191 | 202 | 224 | 259 | 197 | 181 | 227  | 0.80     | 0.127168 | 153 | 139 | 160 | 231 | 191 | 159 | 214 | 204 | 150 | 200  | 0.75     | 0.026329 | 194      | 0.78     | 0.118503 |          |
| 257418_at   | At1g30850 | hypothetical protein predicted by gensec hypothetical protein                        |                                             | 25  | 29  | 43  | 47  | 37  | 42  | 35  | 42   | 0.83     | 0.231874 | 33  | 48  | 46  | 40  | 36  | 37  | 49  | 39  | 42  | 40   | 1.04     | 0.727432 | 38       | 1.11     | 0.429388 |          |
| 257419_at   | At1g30800 | hypothetical protein predicted by gensec hypothetical protein predicted by gensec    |                                             | 142 | 182 | 192 | 192 | 238 | 184 | 172 | 205  | 0.84     | 0.229228 | 147 | 133 | 154 | 202 | 187 | 187 | 187 | 181 | 164 | 145  | 184      | 0.79     | 0.005774 | 192      | 0.75     | 0.004210 |
| 257421_at   | At1g12030 | hypothetical protein predicted by gensec expressed protein                           |                                             | 23  | 24  | 31  | 41  | 27  | 26  | 31  | 0.84 | 0.447406 | 15       | 15  | 24  | 17  | 16  | 19  | 24  | 18  | 18  | 18  | 19   | 0.94     | 0.685282 | 18       | 1.01     | 0.942107 |          |
| 257422_at   | At1g11940 | hypothetical protein Contains similarity expressed protein                           |                                             | 115 | 148 | 160 | 147 | 179 | 139 | 141 | 155  | 0.91     | 0.478480 | 157 | 181 | 175 | 216 | 172 | 144 | 157 | 150 | 171 | 168  | 1.02     | 0.883048 | 178      | 0.96     | 0.772927 |          |
| 257423_at   | At1g62800 | hypothetical protein predicted by gensec mitochondrial transcription termination fa  |                                             | 110 | 117 | 140 | 117 | 130 | 112 | 148 | 0.77 | 0.047453 | 118      | 116 | 135 | 158 | 146 | 145 | 128 | 168 | 145 | 148 | 0.81 | 0.025343 | 144      | 0.91     | 0.044774 |          |          |
| 257424_at   | At1g78840 | hypothetical protein predicted by gensec F-box family protein                        |                                             | 37  | 34  | 56  | 54  | 50  | 46  | 42  | 50   | 0.84     | 0.347651 | 33  | 26  | 42  | 39  | 33  | 36  | 35  | 36  | 34  | 36   | 0.95     | 0.625191 | 36       | 0.94     | 0.858586 |          |
| 257425_at   | At1g60400 | hypothetical protein similar to heat shock F-box family protein                      |                                             | 53  | 77  | 81  | 81  | 97  | 75  | 70  | 84   | 0.83     | 0.257054 | 51  | 49  | 53  | 66  | 51  | 56  | 52  | 51  | 51  | 55   | 0.92     | 0.314941 | 57       | 0.88     | 0.209690 |          |
| 257426_at   | At1g54850 | hypothetical protein contains similarity i expressed protein                         |                                             | 289 | 385 | 407 | 428 | 458 | 349 | 360 | 411  | 0.88     | 0.353342 | 368 | 418 | 408 | 590 | 425 | 453 | 456 | 401 | 398 | 465  | 0.86     | 0.187517 | 409      | 0.81     | 0.161644 |          |
| 257427_at   | At1g73060 | hypothetical protein predicted by gensec expressed protein                           |                                             | 182 | 246 | 237 | 274 | 290 | 224 | 118 | 263  | 0.83     | 0.018820 | 299 | 282 | 284 | 450 | 363 | 453 | 404 | 363 | 289 | 379  | 0.76     | 0.026448 | 375      | 0.77     | 0.087952 |          |
| 257428_at   | At1g78900 | hypothetical protein predicted by gensec transferase family protein                  |                                             | 40  | 31  | 49  | 39  | 41  | 49  | 40  | 43   | 0.83     | 0.631000 | 27  | 25  | 37  | 27  | 27  | 27  | 29  | 33  | 30  | 29   | 1.03     | 0.773307 | 27       | 1.09     | 0.531109 |          |
| 257429_at   | At2g27940 | putative RING zinc finger protein                                                    | zinc finger (C3HC4-type RING finger) fa     | 20  | 16  | 24  | 25  | 21  | 20  | 23  | 0.86 | 0.273548 | 15       | 16  | 22  | 16  | 19  | 17  | 16  | 16  | 16  | 18  | 17   | 1.06     | 0.631934 | 17       | 1.03     | 0.866988 |          |
| 257430_at   | At2g28580 | hypothetical protein similar to hypoethi expressed protein                           |                                             | 49  | 48  | 58  | 59  | 66  | 57  | 52  | 60   | 0.86     | 0.109529 | 53  | 42  | 59  | 52  | 44  | 52  | 65  | 51  | 51  | 53   | 0.97     | 0.706920 | 50       | 1.04     | 0.784189 |          |
| 257431_at   | At2g36360 | unknown protein                                                                      | helix repeat-containing protein             | 185 | 247 | 261 | 283 | 304 | 238 | 231 | 275  | 0.84     | 0.216604 | 200 | 184 | 199 | 258 | 218 | 204 | 221 | 213 | 195 | 223  | 0.87     | 0.073202 | 227      | 0.86     | 0.131382 |          |
| 257432_at   | At2g21850 | unknown protein                                                                      | DC1 domain-containing protein               | 25  | 27  | 39  | 29  | 38  | 34  | 30  | 34   | 0.89     | 0.505023 | 30  | 34  | 34  | 44  | 23  | 24  | 26  | 33  | 34  | 28   | 1.20     | 0.147347 | 27       | 1.26     | 0.165685 |          |
| 257433_at   | At2g21990 | hypothetical protein predicted by gensec expressed protein                           |                                             | 26  | 31  | 41  | 35  | 43  | 42  | 32  | 40   | 0.81     | 0.212502 | 24  | 37  | 30  | 33  | 30  | 25  | 44  | 44  | 30  | 35   | 0.87     | 0.454052 | 29       | 1.04     | 0.780784 |          |
| 257434_at   | At2g21740 | hypothetical protein predicted by gensec hypothetical protein                        |                                             | 104 | 139 | 141 | 22  | 31  | 23  | 128 | 25   | 5.03     | 0.001238 | 290 | 302 | 309 | 21  | 18  | 24  | 20  | 16  | 301 | 20   | 15.25    | 0.000000 | 21       | 14.31    | 0.000001 |          |
| 257435_at   | At2g45900 | putative RSZp22 splicing factor                                                      | splicing factor, putative                   | 581 | 764 | 839 | 858 | 987 | 890 | 728 | 912  | 0.80     | 0.099636 | 631 | 733 | 715 | 916 | 716 | 710 | 686 | 679 | 693 | 742  | 0.93     | 0.475250 | 781      | 0.89     | 0.306292 |          |
| 257436_s_at | At2g34650 | hypothetical protein predicted by gensec transcriptional factor B3 family protein // |                                             | 16  | 22  | 23  | 253 | 265 | 203 | 199 | 240  | 0.83     | 0.157131 | 149 | 139 | 182 | 229 | 203 | 165 | 179 | 182 | 157 | 194  | 0.81     | 0.111627 | 202      | 0.77     | 0.146289 |          |
| 257437_s_at | At2g16290 | hypothetical protein predicted by gensec F-box family protein                        |                                             | 27  | 24  | 30  | 28  | 33  | 31  | 27  | 31   | 0.88     | 0.180799 | 20  | 21  | 21  | 26  | 22  | 23  | 26  | 28  | 21  | 25   | 0.82     | 0.029908 | 24       | 0.86     | 0.093128 |          |
| 257438_at   | At2g15325 | hypothetical protein similar to plant li protease inhibitor/seed storage/acid tran   |                                             | 17  | 21  | 23  | 23  | 26  | 22  | 20  | 24   | 0.86     | 0.182009 | 18  | 19  | 22  | 19  | 22  | 19  | 22  | 17  | 21  | 20   | 18       | 1.07     | 0.560893 | 16       | 1.19     | 0.208739 |
| 257439_at   | At2g17000 | hypothetical protein similar to hypoethi mechanosensitive ion channel domain-c       |                                             | 15  | 15  | 17  | 12  | 15  | 13  | 16  | 13   | 1.19     | 0.106836 | 14  | 13  | 14  | 14  | 10  | 8   | 10  | 12  | 14  | 11   | 1.28     | 0.089027 | 11       | 1.30     | 0.165308 |          |
| 257440_at   | At2g48800 | unknown protein                                                                      | self-incompatibility protein-related // sal | 7   | 5   | 8   | 9   | 5   | 7   | 7   | 0.90 | 0.623459 | 9        | 5   | 5   | 6   | 6   | 6   | 6   | 8   | 6   | 6   | 1.00 | 0.992893 | 6        | 1.09     | 0.707061 |          |          |
| 257441_at   | At2g04020 | putative GDSL-motif lipase/hydrolase s GDSL-motif lipase/hydrolase family pro        |                                             | 43  | 52  | 66  | 59  | 64  | 71  | 54  | 65   | 0.83     | 0.205253 | 37  | 33  | 45  | 38  | 43  | 38  | 43  | 39  | 39  | 40   | 0.96     | 0.624202 | 40       | 0.97     | 0.793559 |          |
| 257442_at   | At2g28660 | leucin-like protein contains a 11-S plc cupin family protein                         |                                             | 250 | 364 | 336 | 46  | 48  | 45  | 316 | 47   | 0.77     | 0.001424 | 279 | 356 | 275 | 32  | 28  | 38  | 35  | 31  | 303 | 33   | 9.25     | 0.000008 | 33       | 9.26     | 0.000517 |          |
| 257443_at   | At2g22050 | hypothetical protein predicted by gensec kelch repeat-containing F-box family pro    |                                             | 250 | 364 | 336 | 46  | 48  | 45  | 316 | 47   | 0.77     | 0.001424 | 279 | 356 | 275 | 32  | 28  | 38  | 35  | 31  | 303 | 33   | 9.25     | 0.000008 | 33       | 9.26     | 0.000517 |          |
| 257444_at   | At1g12550 | hypothetical protein predicted by gensec ubiquitin-associated (UBA)/TS-N domain      |                                             | 226 | 339 | 374 | 313 | 436 | 307 | 313 | 352  | 0.89     | 0.558033 | 288 | 250 | 303 | 404 | 326 | 312 | 316 | 314 | 280 | 334  | 0.84     | 0.084546 | 347      | 0.81     | 0.109742 |          |
| 257445_s_at | At2g10390 | hypothetical protein predicted by gensec Mutator-like transposase family // csear    |                                             | 13  | 13  | 16  | 12  | 6   | 4   | 5   | 10   | 0.92     | 0.164306 | 9   | 8   | 10  | 12  | 11  | 8   | 10  | 12  | 11  | 8    | 1.17     | 0.11280  | 10       | 1.32     | 0.338825 |          |
| 257446_at   | At2g10440 | hypothetical protein predicted by gensec hypothetical protein                        |                                             | 5   | 5   | 6   | 4   | 5   | 6   | 4   | 5    | 0.62     | 0.311171 | 6   | 8   | 6   | 3   | 5   | 7   | 6   | 11  | 7   | 6    | 1.17     | 0.368484 | 5        | 1.23     | 0.376092 |          |
| 257447_at   | At2g04230 | hypothetical protein predicted by gensec F-box family protein                        |                                             | 212 | 284 | 281 | 312 | 383 | 249 | 259 | 315  | 0.82     | 0.285150 | 228 | 170 | 232 | 294 | 302 | 239 | 251 | 249 | 210 | 267  | 0.79     | 0.043827 | 278      | 0.75     | 0.070429 |          |
| 257448_s_at | At2g48800 | putative protein various predicted prote hypothetical protein // hypothetical prote  |                                             | 21  | 37  | 27  | 31  | 31  | 30  | 28  | 31   | 0.92     | 0.660216 | 24  | 27  | 25  | 38  | 34  | 26  | 26  | 25  | 30  | 30   | 0.83     | 0.172645 | 33       | 0.76     | 0.086958 |          |
| 257449_at   | At2g31400 | hypothetical protein predicted by gensec hypothetical protein                        |                                             | 45  | 47  | 64  | 58  | 69  | 63  | 52  | 60   | 0.87     | 0.237860 | 44  | 34  | 52  | 54  | 45  | 48  | 65  | 51  | 44  | 52   | 0.85     | 0.071627 | 60       | 0.89     | 0.366961 |          |
| 257450_at   | At1g10530 | unknown protein similar to obAAED1441 expressed protein                              |                                             | 28  | 34  | 43  | 34  | 42  | 39  | 35  | 38   | 0.92     | 0.561011 | 30  | 31  | 32  | 29  | 25  | 27  | 27  | 28  | 31  | 27   | 1.14     | 0.013913 | 27       | 1.15     | 0.048743 |          |
| 257451_at   | At1g05690 | hypothetical protein predicted by gensec TA2 zinc finger family protein / BTB/POZ    |                                             | 60  | 79  | 79  | 71  | 72  | 65  | 73  | 69   | 1.05     | 0.661627 | 68  | 74  | 69  | 96  | 60  | 64  | 85  | 78  | 70  | 77   | 0.92     | 0.506753 | 74       | 0.96     | 0.794755 |          |
| 257452_at   | At1g05740 | hypothetical protein predicted by gensec hypothetical protein                        |                                             | 37  | 42  | 44  | 51  | 59  | 45  | 41  | 52   | 0.79     | 0.083357 | 36  | 23  | 37  | 36  | 30  | 31  | 35  | 32  | 32  | 33   | 0.98     | 0.892350 | 32       | 1.00     | 0.962413 |          |
| 257453_at   | At1g65130 | hypothetical protein predicted by gensec ubiquitin carboxyl-terminal hydrolase-rel   |                                             | 16  | 23  | 24  | 24  | 24  | 16  | 23  | 24   | 0.81     | 0.096517 | 17  | 17  | 17  | 20  | 17  | 17  | 18  | 17  | 20  | 17   | 1.07     | 0.03063  | 20       | 0.85     | 0.046889 |          |
| 257454_at   | At1g65170 | hypothetical protein predicted by gensec ubiquitin carboxyl-terminal hydrolase fan   |                                             | 18  | 19  | 29  | 26  | 25  | 21  | 22  | 24   | 0.92     | 0.631885 | 20  | 22  | 21  | 15  | 18  | 17  | 19  | 21  | 21  | 18   | 1.17     | 0.084015 | 17       | 1.26     | 0.025748 |          |
| 257455_s_at | At2g16100 | hypothetical protein                                                                 |                                             | 29  | 47  | 44  | 36  | 46  | 40  | 40  | 41   | 0.98     | 0.918985 | 22  | 17  | 22  | 22  | 18  | 18  | 26  | 20  | 20  | 21   | 0.98     | 0.884774 | 19       | 1.06     | 0.601847 |          |
| 257456_at   | At2g18120 | unknown protein predicted by gensecan lateral root primordium (LRP) protein-rel      |                                             | 31  | 26  | 39  | 29  | 38  | 31  | 32  | 33   | 0.98     | 0.895320 | 26  | 24  | 30  | 28  | 24  | 26  | 23  | 21  | 27  | 25   | 1.09     | 0.323859 | 26       | 1.02     | 0.772465 |          |
| 257457_at   | At2g04300 | hypothetical protein predicted by gensec expressed protein                           |                                             | 22  | 21  | 30  | 30  | 28  | 34  | 26  | 31   | 0.85     | 0.422607 | 19  | 34  | 25  | 20  | 19  | 16  | 27  | 20  | 21  | 0.98 | 0.806965 | 18       | 1.10     | 0.551219 |          |          |
| 257458_at   | At2g04400 | hypothetical protein predicted by gensec mesrin and TRAF homolog domain-con          |                                             | 32  | 37  | 38  | 38  | 40  | 35  | 38  | 38   | 0.96     | 0.540281 | 42  | 64  | 54  | 46  | 42  | 37  | 40  | 45  | 41  | 42   | 1.28     | 0.052108 | 48       | 1.10     | 0.176765 |          |
| 257459_at   | At1g24040 | unknown protein                                                                      | GNAS-related N-acetyltransferase (GNA       | 48  | 74  | 73  | 101 | 96  | 71  | 65  | 89   | 0.73     | 0.122777 | 62  | 70  | 79  | 102 | 80  | 83  | 67  | 69  | 71  | 80   | 0.89     | 0.342537 | 89       | 0.80     | 0.095932 |          |
| 257460_at   | At1g75580 | auxin induced protein, putative similar auxin-responsive protein, putative           |                                             | 206 | 364 | 329 | 392 | 466 | 336 | 300 | 398  | 0.75     | 0.181953 | 223 | 240 | 266 | 388 | 310 | 260 | 230 | 222 | 243 | 282  | 0.86     | 0.384274 | 319      | 0.76     | 0.122230 |          |
| 257461_at   | At1g78470 | hypothetical protein predicted by gensec purine permease-related                     |                                             | 72  | 123 | 111 | 106 | 113 | 91  | 110 | 0.83 | 0.305097 | 56       | 70  | 75  | 72  | 55  | 66  | 77  | 75  | 67  | 69  | 0.97 | 0.763242 | 64       | 1.04     | 0.758094 |          |          |
| 257462_at   | At1g68740 | hypothetical protein predicted by gensec F-box family protein                        |                                             | 27  | 30  | 31  | 27  | 31  | 30  | 29  | 1.05 | 0.049091 | 27       | 31  | 25  | 22  | 25  | 22  | 23  | 20  | 23  | 27  | 1.27 | 0.204526 | 25       | 1.35     | 0.253739 |          |          |
| 257463_at   | At1g14820 | choshadhidvinolol/choshadhidvchoir SEC14 cytosolic factor family protein / o         |                                             | 410 | 537 | 501 | 580 | 649 | 528 | 483 | 585  | 0.83     | 0.119636 | 426 | 427 | 433 | 733 | 598 | 563 | 564 | 566 | 429 | 605  | 0.71     | 0.006813 | 631      | 0.68     | 0.017389 |          |
| 257464_at   | At1g20940 | hypothetical protein predicted by gensec F-box family protein                        |                                             | 14  | 14  | 18  | 17  | 17  | 15  | 15  | 16   | 0.93     | 0.543872 | 13  | 17  | 15  | 18  | 11  | 13  | 15  | 14  | 13  | 15   | 1.06     | 0.637988 | 14       | 1.06     | 0.726588 |          |
| 257465_at   | At1g13040 | hypothetical protein predicted by gensec polyomacropide (PPR                         |                                             |     |     |     |     |     |     |     |      |          |          |     |     |     |     |     |     |     |     |     |      |          |          |          |          |          |          |

|             |           |                                            |                                                |     |     |     |     |     |     |     |      |          |          |     |     |     |     |     |     |     |     |        |      |          |          |      |          |          |
|-------------|-----------|--------------------------------------------|------------------------------------------------|-----|-----|-----|-----|-----|-----|-----|------|----------|----------|-----|-----|-----|-----|-----|-----|-----|-----|--------|------|----------|----------|------|----------|----------|
| 257514_at   | At1g43940 | hypothetical protein similar to putative r | hypothetical protein                           | 15  | 16  | 17  | 20  | 24  | 17  | 16  | 21   | 0.79     | 0.112504 | 18  | 20  | 18  | 18  | 15  | 13  | 22  | 19  | 19     | 17   | 1.08     | 0.512743 | 15   | 1.21     | 0.098187 |
| 257515_at   | At1g13290 | zinc finger protein, putative similar to z | zinc finger (C2H2 type) family protein         | 59  | 71  | 82  | 109 | 155 | 95  | 71  | 120  | 0.59     | 0.063094 | 34  | 29  | 40  | 42  | 38  | 35  | 35  | 38  | 34     | 37   | 0.91     | 0.291817 | 38   | 0.89     | 0.351451 |
| 257516_at   | At1g09040 | unknown protein                            | ACT domain containing protein (ACR4)           | 284 | 287 | 327 | 404 | 388 | 320 | 299 | 371  | 0.81     | 0.071631 | 482 | 461 | 528 | 779 | 601 | 541 | 752 | 727 | 490    | 680  | 0.72     | 0.023925 | 641  | 0.77     | 0.112343 |
| 257517_at   | At3g04330 | unknown protein                            | unknown protein                                | 42  | 43  | 42  | 78  | 86  | 89  | 42  | 84   | 0.50     | 0.000235 | 64  | 75  | 79  | 148 | 105 | 104 | 98  | 96  | 73     | 110  | 0.66     | 0.031994 | 119  | 0.61     | 0.040256 |
| 257518_at   | At3g03880 | hypothetical protein                       | expressed protein                              | 251 | 206 | 357 | 369 | 412 | 307 | 301 | 363  | 0.83     | 0.227549 | 335 | 359 | 353 | 518 | 425 | 377 | 378 | 358 | 349    | 411  | 0.85     | 0.161022 | 440  | 0.79     | 0.090608 |
| 257519_at   | At3g01210 | unknown protein                            | RNA recognition motif (RRM)-containing         | 154 | 221 | 219 | 265 | 288 | 228 | 198 | 260  | 0.76     | 0.092740 | 221 | 253 | 266 | 459 | 296 | 302 | 324 | 311 | 247    | 338  | 0.73     | 0.070633 | 352  | 0.70     | 0.126800 |
| 257520_at   | At3g07710 | hypothetical protein                       | hypothetical protein                           | 20  | 18  | 28  | 26  | 24  | 27  | 22  | 26   | 0.86     | 0.286497 | 8   | 9   | 13  | 12  | 13  | 14  | 17  | 16  | 10     | 14   | 0.68     | 0.034038 | 13   | 0.75     | 0.134855 |
| 257521_at   | At3g08140 | hypothetical protein predicted by gene     | expressed protein                              | 41  | 49  | 50  | 47  | 47  | 53  | 47  | 49   | 0.94     | 0.464659 | 40  | 55  | 61  | 42  | 42  | 45  | 42  | 45  | 42     | 44   | 1.19     | 0.163993 | 43   | 1.21     | 0.221237 |
| 257522_at   | At3g08990 | Yiscoe-like protein similar to Yiscoe      | du glycosyl family protein                     | 148 | 233 | 197 | 218 | 262 | 191 | 193 | 224  | 0.86     | 0.393100 | 204 | 202 | 216 | 257 | 231 | 219 | 211 | 207 | 207    | 225  | 0.92     | 0.206731 | 236  | 0.88     | 0.080544 |
| 257523_at   | At3g01620 | hypothetical protein similar to putative   | glycosyl transferase family 17 protein         | 49  | 58  | 83  | 63  | 76  | 50  | 64  | 63   | 1.01     | 0.960420 | 53  | 55  | 52  | 63  | 51  | 57  | 63  | 54  | 53     | 58   | 0.92     | 0.225677 | 57   | 0.94     | 0.345057 |
| 257524_at   | At3g01330 | hypothetical protein similar to putative   | r transcription factor, putative / EZF-like re | 68  | 91  | 75  | 94  | 98  | 86  | 78  | 93   | 0.84     | 0.121041 | 88  | 69  | 95  | 108 | 86  | 90  | 85  | 80  | 84     | 90   | 0.93     | 0.506066 | 95   | 0.89     | 0.352204 |
| 257525_at   | At3g04900 | hypothetical protein predicted by gene     | heavy-metal-associated domain-contain          | 22  | 25  | 33  | 29  | 37  | 33  | 26  | 33   | 0.80     | 0.168616 | 26  | 19  | 27  | 21  | 21  | 20  | 22  | 22  | 24     | 21   | 1.14     | 0.145169 | 21   | 1.16     | 0.244620 |
| 257526_s_at | At3g04330 | hypothetical protein similar to putative   | r amino acid transporter family protein        | 68  | 73  | 121 | 109 | 115 | 84  | 87  | 103  | 0.85     | 0.047000 | 48  | 46  | 55  | 58  | 44  | 51  | 67  | 54  | 50     | 55   | 0.91     | 0.403255 | 51   | 0.88     | 0.817320 |
| 257527_at   | At3g01880 | hypothetical protein similar to hypothet   | ical protein                                   | 21  | 28  | 37  | 31  | 38  | 34  | 29  | 35   | 0.83     | 0.292439 | 21  | 23  | 28  | 21  | 23  | 23  | 24  | 21  | 24     | 22   | 1.08     | 0.320582 | 23   | 1.07     | 0.456446 |
| 257528_at   | At3g02125 | hypothetical protein predicted by gene     | hypothetical protein                           | 27  | 41  | 34  | 33  | 37  | 37  | 34  | 36   | 0.96     | 0.275820 | 34  | 38  | 35  | 34  | 23  | 29  | 27  | 33  | 35     | 30   | 1.17     | 0.044534 | 31   | 1.15     | 0.085303 |
| 257529_at   | At3g03290 | hypothetical protein predicted by gene     | usical stress protein (USP) family circ        | 13  | 20  | 20  | 21  | 18  | 22  | 17  | 21   | 0.85     | 0.301383 | 16  | 7   | 15  | 14  | 16  | 14  | 13  | 13  | 13     | 14   | 0.91     | 0.588443 | 15   | 0.87     | 0.524760 |
| 257530_at   | At3g03040 | unknown protein                            | F-box family protein                           | 103 | 162 | 160 | 199 | 238 | 160 | 142 | 199  | 0.71     | 0.125614 | 134 | 125 | 132 | 199 | 153 | 140 | 163 | 151 | 131    | 161  | 0.81     | 0.067919 | 164  | 0.80     | 0.141453 |
| 257531_at   | At3g07240 | putative RNA-binding protein contains      | nuclear stress factor 2 (NTF2) fami            | 26  | 35  | 49  | 40  | 45  | 44  | 37  | 43   | 0.85     | 0.397951 | 28  | 42  | 41  | 32  | 34  | 28  | 33  | 32  | 37     | 32   | 1.16     | 0.188741 | 31   | 1.19     | 0.282574 |
| 257532_at   | At3g04700 | hypothetical protein similar to hypothet   | ical protein                                   | 94  | 88  | 103 | 67  | 91  | 49  | 95  | 69   | 1.38     | 0.116258 | 59  | 62  | 56  | 68  | 42  | 56  | 45  | 41  | 59     | 50   | 1.18     | 0.236291 | 55   | 1.08     | 0.609446 |
| 257533_at   | At3g10840 | putative alpha/beta hydrolase contains     | hydrolase, alpha/beta fold family protein      | 121 | 139 | 122 | 176 | 177 | 143 | 127 | 166  | 0.77     | 0.037592 | 122 | 112 | 134 | 190 | 154 | 131 | 140 | 137 | 122    | 150  | 0.81     | 0.109205 | 159  | 0.77     | 0.118941 |
| 257534_at   | At3g09670 | hypothetical protein predicted by gene     | sc PWWP domain-containing protein              | 177 | 235 | 235 | 239 | 258 | 211 | 216 | 236  | 0.91     | 0.445045 | 142 | 127 | 143 | 190 | 146 | 122 | 173 | 171 | 138    | 161  | 0.86     | 0.211901 | 153  | 0.90     | 0.504267 |
| 257535_at   | At3g09490 | hypothetical protein predicted by gene     | sc chloroplast lumen common fami               | 17  | 18  | 25  | 22  | 28  | 25  | 20  | 25   | 0.80     | 0.192900 | 17  | 21  | 19  | 19  | 14  | 18  | 26  | 18  | 19     | 19   | 0.98     | 0.908492 | 17   | 1.09     | 0.443689 |
| 257536_at   | At3g02800 | unknown protein                            | thiosine specific protein chosohatase fa       | 118 | 157 | 190 | 231 | 260 | 150 | 155 | 214  | 0.72     | 0.204214 | 133 | 138 | 125 | 212 | 139 | 153 | 167 | 147 | 132    | 164  | 0.81     | 0.118596 | 168  | 0.79     | 0.185497 |
| 257537_at   | At3g22350 | hypothetical protein predicted by gene     | m TSOI-like CXC domain-containir               | 28  | 38  | 39  | 38  | 40  | 35  | 35  | 38   | 0.93     | 0.505913 | 23  | 29  | 33  | 26  | 23  | 25  | 28  | 29  | 28     | 26   | 1.08     | 0.450070 | 25   | 1.14     | 0.309302 |
| 257538_at   | At3g16160 | hypothetical protein predicted by gene     | lesinin/TSOI-like CXC domain-containir         | 37  | 50  | 47  | 57  | 53  | 46  | 52  | 57   | 0.87     | 0.285563 | 33  | 47  | 40  | 42  | 39  | 38  | 33  | 40  | 40     | 38   | 1.05     | 0.622600 | 40   | 1.01     | 0.948639 |
| 257539_at   | At3g29150 | hypothetical protein predicted by gene     | expressed protein                              | 47  | 47  | 55  | 55  | 63  | 55  | 49  | 58   | 0.85     | 0.094812 | 45  | 51  | 52  | 55  | 53  | 49  | 66  | 60  | 49     | 56   | 0.88     | 0.155501 | 52   | 0.95     | 0.396435 |
| 257540_at   | At3g21520 | hypothetical protein                       | expressed protein                              | 23  | 21  | 33  | 25  | 33  | 25  | 25  | 28   | 0.92     | 0.653984 | 18  | 19  | 23  | 17  | 18  | 22  | 18  | 20  | 20     | 19   | 1.04     | 0.665286 | 19   | 1.04     | 0.750807 |
| 257541_at   | At3g25950 | hypothetical protein predicted by gene     | hypothetical protein                           | 166 | 188 | 265 | 235 | 230 | 213 | 206 | 226  | 0.91     | 0.554345 | 102 | 101 | 114 | 137 | 92  | 107 | 150 | 125 | 106    | 122  | 0.87     | 0.292194 | 112  | 0.94     | 0.676288 |
| 257542_at   | At3g26050 | hypothetical protein predicted by gene     | expressed protein                              | 63  | 86  | 77  | 85  | 98  | 74  | 75  | 85   | 0.88     | 0.357803 | 57  | 59  | 68  | 72  | 65  | 61  | 72  | 60  | 61     | 66   | 0.93     | 0.314917 | 66   | 0.93     | 0.347051 |
| 257543_at   | At3g26950 | hypothetical protein predicted by gene     | heavy-metal-associated domain-contain          | 15  | 24  | 31  | 22  | 29  | 23  | 23  | 22   | 1.04     | 0.849768 | 20  | 22  | 21  | 16  | 16  | 21  | 16  | 21  | 16     | 20   | 1.06     | 0.607927 | 20   | 1.12     | 0.245435 |
| 257544_at   | At3g02880 | putative DNA-binding protein similar to    | zinc finger (C2H2 type) protein (WIP4)         | 67  | 86  | 99  | 99  | 107 | 95  | 84  | 100  | 0.83     | 0.166403 | 57  | 56  | 58  | 68  | 52  | 53  | 60  | 58  | 57     | 58   | 0.97     | 0.176236 | 57   | 0.99     | 0.883100 |
| 257545_at   | At3g23200 | hypothetical protein predicted by gene     | sc expressed protein                           | 40  | 47  | 43  | 52  | 56  | 48  | 43  | 52   | 0.83     | 0.047564 | 32  | 35  | 41  | 57  | 47  | 41  | 51  | 43  | 36     | 48   | 0.76     | 0.040681 | 48   | 0.75     | 0.092042 |
| 257546_s_at | At3g28410 | hypothetical protein predicted by gene     | F-box family protein                           | 21  | 24  | 35  | 31  | 31  | 34  | 26  | 32   | 0.83     | 0.267337 | 21  | 22  | 23  | 18  | 22  | 17  | 18  | 22  | 22     | 20   | 1.13     | 0.134402 | 19   | 1.15     | 0.158675 |
| 257547_at   | At3g13000 | hypothetical protein predicted by gene     | sc expressed protein                           | 205 | 293 | 313 | 365 | 296 | 256 | 326 | 0.79 | 0.103610 | 266      | 258 | 285 | 397 | 311 | 360 | 369 | 270 | 368 | 369    | 311  | 0.77     | 0.033061 | 332  | 0.81     | 0.141958 |
| 257548_s_at | At3g28620 | hypothetical protein                       | LOB domain protein, putative / lateral or      | 17  | 20  | 17  | 12  | 18  | 15  | 18  | 15   | 1.21     | 0.200675 | 11  | 15  | 11  | 15  | 12  | 15  | 10  | 12  | 12     | 10   | 1.07     | 0.975856 | 14   | 0.89     | 0.338962 |
| 257549_at   | At3g18650 | hypothetical protein predicted by gene     | MADS-box family protein                        | 18  | 20  | 29  | 27  | 32  | 29  | 22  | 29   | 0.76     | 0.144058 | 18  | 18  | 28  | 19  | 17  | 24  | 23  | 21  | 21     | 21   | 1.03     | 0.830654 | 20   | 1.06     | 0.751510 |
| 257550_at   | At3g18460 | hypothetical protein similar to GB-AAD1    | hypothetical protein                           | 27  | 25  | 36  | 35  | 35  | 31  | 29  | 34   | 0.86     | 0.242980 | 28  | 28  | 40  | 27  | 32  | 30  | 33  | 33  | 32     | 31   | 1.03     | 0.800753 | 30   | 1.07     | 0.649025 |
| 257551_at   | At3g13270 | hypothetical protein contains similar      | ly 1 hypothetical protein                      | 31  | 30  | 35  | 37  | 35  | 34  | 32  | 35   | 0.91     | 0.144040 | 34  | 30  | 36  | 27  | 28  | 32  | 32  | 28  | 34     | 29   | 1.15     | 0.059812 | 29   | 1.17     | 0.102684 |
| 257552_at   | At3g28130 | cellulase, putative contains Pfam profi    | glycosyl hydrolase family 5 protein / cellu    | 18  | 22  | 22  | 21  | 28  | 16  | 20  | 22   | 0.94     | 0.730729 | 21  | 18  | 20  | 18  | 21  | 19  | 16  | 106 | 459475 | 19   | 1.01     | 0.861534 |      |          |          |
| 257553_at   | At3g16830 | unknown protein contains Pfam profile      | WD-40 repeat family protein                    | 492 | 618 | 628 | 591 | 650 | 510 | 579 | 584  | 0.99     | 0.943030 | 370 | 360 | 431 | 531 | 474 | 385 | 462 | 465 | 387    | 463  | 0.84     | 0.070973 | 463  | 0.83     | 0.184177 |
| 257554_at   | At3g24890 | svnaobrevin, putative similar to SYN       | synaptobrevin-related                          | 24  | 84  | 86  | 102 | 123 | 102 | 80  | 109  | 0.74     | 0.029186 | 89  | 100 | 98  | 161 | 114 | 118 | 132 | 114 | 96     | 128  | 0.75     | 0.038451 | 131  | 0.73     | 0.083260 |
| 257555_at   | At3g24780 | hypothetical protein predicted by gene     | hypothetical protein                           | 24  | 27  | 33  | 29  | 33  | 33  | 28  | 32   | 0.88     | 0.260142 | 23  | 19  | 27  | 20  | 23  | 27  | 27  | 23  | 23     | 1.00 | 0.995206 | 21       | 1.12 | 0.386286 |          |
| 257556_at   | At3g28090 | hypothetical protein predicted by gene     | nculin MIN21 family protein                    | 21  | 25  | 31  | 28  | 28  | 26  | 26  | 28   | 0.93     | 0.515798 | 19  | 26  | 31  | 25  | 24  | 23  | 25  | 23  | 25     | 24   | 1.04     | 0.702659 | 24   | 1.04     | 0.790824 |
| 257557_at   | At3g14490 | terpene synthase-related protein, puta     | terpene synthase/cyclase family protein        | 11  | 12  | 16  | 14  | 15  | 15  | 13  | 14   | 0.89     | 0.301614 | 10  | 11  | 12  | 10  | 13  | 10  | 10  | 10  | 11     | 1.01 | 0.891577 | 11       | 0.96 | 0.703973 |          |
| 257558_s_at | At3g22000 | hypothetical protein contains Pfam prof    | receptor-like protein kinase-related           | 15  | 15  | 17  | 15  | 17  | 19  | 16  | 17   | 0.94     | 0.467867 | 12  | 12  | 13  | 15  | 8   | 15  | 17  | 13  | 12     | 13   | 0.93     | 0.656137 | 12   | 1.00     | 0.995072 |
| 257559_at   | At3g22050 | hypothetical protein contains Pfam prof    | receptor-like protein kinase-related           | 12  | 15  | 23  | 18  | 16  | 22  | 17  | 19   | 0.88     | 0.564713 | 11  | 11  | 15  | 13  | 14  | 12  | 11  | 10  | 13     | 12   | 1.04     | 0.751173 | 13   | 0.96     | 0.725309 |
| 257560_at   | At3g14960 | galactosyltransferase, putative contain    | galactosyltransferase family protein           | 132 | 169 | 180 | 191 | 202 | 163 | 180 | 185  | 0.86     | 0.244641 | 128 | 137 | 156 | 205 | 172 | 164 | 154 | 153 | 140    | 170  | 0.83     | 0.082394 | 180  | 0.78     | 0.056036 |
| 257561_at   | At3g24270 | hypothetical protein predicted by gene     | hypothetical protein                           | 28  | 32  | 36  | 37  | 40  | 38  | 32  | 38   | 0.84     | 0.055310 | 25  | 23  | 27  | 28  | 28  | 22  | 24  | 30  | 25     | 26   | 0.94     | 0.464880 | 26   | 0.95     | 0.582442 |
| 257562_at   | At3g30480 |                                            |                                                |     |     |     |     |     |     |     |      |          |          |     |     |     |     |     |     |     |     |        |      |          |          |      |          |          |
