# Supplementary material
Source: PubMed Central journal article supplement (PMC1310564)
Supplement: plntphys_pp.105.067314_2.pdf [file plntphys_pp.105.067314_2.pdf]

## SUPPLEMENTAL DATA

**Figure S1.** Overview of the DNA array profile by use of the data from late staged ovule from non-emasculated *spl* mutant plants only. The genes of the Venn diagram were  $\geq 2$  fold higher in wild type than in *spl* with P values of  $<0.005$  and signal values of  $> 60$ .

**Figure S2.** GUS expression pattern of the promoter::*GUS* fusion with *At5g40260* in developing anthers. GUS staining of tissues was performed with 5mM potassium ferri-, and ferrocyanide. After staining, anthers were cleared in Hoyer's solution (Liu and Meinke, 1998). Scale bars represent 50  $\mu\text{m}$  in A and D, 20  $\mu\text{m}$  in B and C, and 100  $\mu\text{m}$  in E~I. Floral stages, pollen or stamen developments were referred from papers of Regan and Moffatt (1990), Smyth et al (1990), Bowman et al (1991) and Ma (2005). GUS activity was not detected in flowers at floral stage 7 (A) including in the stamens (B). By contrast, GUS expression is strong within developing anthers of floral stages 8 to early 13 (C- I). A, Vertical view of a stage 7 bud. The flower bud shows that the stamens do not show locule ridges yet. B, Close-up of stamen of floral stage 7, in which archesporial cells divide to make sporogenous and primary parietal cells, did not show any GUS activity. C, Anther of floral stage 8, in which the stamen with visible locules differentiates to anther and filament, shows GUS activity. Especially, GUS expression is clear and strong in the pollen sacs containing microsporocytes. D, Stamen of floral stage early 9, in which microspore mother cells in anthers separate from each other and from tapetum by a callose wall. E, Stamen of floral stage late 9, in which microspore mother cells form tetrads by meiosis. F, Stamen of floral stage 10, during which microspores separate from callose wall and lie in the pollen sac and make round forms and epidermal cells of anther are clearly distinguished. When GUS staining is performed with 7mM potassium ferri-, and ferrocyanide, no GUS activity is observed in the epidermal cells (data not shown). G, Anther of floral stage 11, in which microspores undergo mitotic division and tapetum of the pollen sac degenerates, shows weaker GUS staining than anthers of other floral stages. H, Anther of floral stage 12, in which microspores complete mitotic division and pollen grains desiccate and the tapetum disappears, shows strong GUS staining in the immature pollen. I, Anther of floral stage early 13, in which anther dehiscence occurs, shows strong GUS staining in the pollen. When GUS staining is performed using 7mM potassium ferri-, and ferrocyanide, GUS activity was clearly restricted to the pollen grains (data not shown).

**Table SI.** Correlation coefficients between the arrays

**Table SII.** Mutants analyzed for embryo sac phenotype

**Table SIII.** Comparison with known genes involved in female gametophyte development

**Table SIV.** Comparative information for embryo sac genes

**Table SV.** The primer sequences used in the promoter::*GUS* fusion

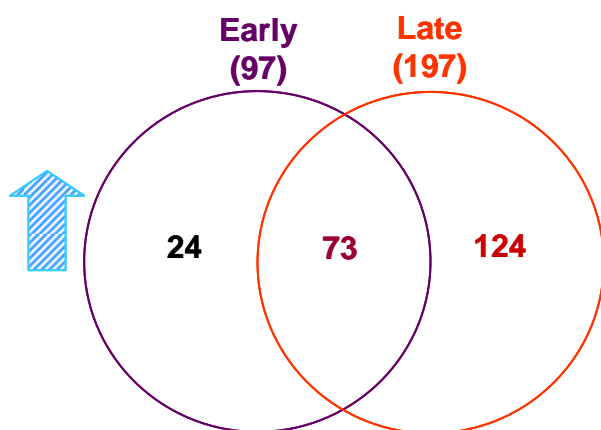

**Figure S1.** Overview of the DNA array profile by use of the data from late staged ovule from non-emasculated *spl* mutant plants only. The genes of the Venn diagram were  $\geq 2$  fold higher in wild type than in *spl* with P values of  $<0.005$  and signal values of  $> 60$ .

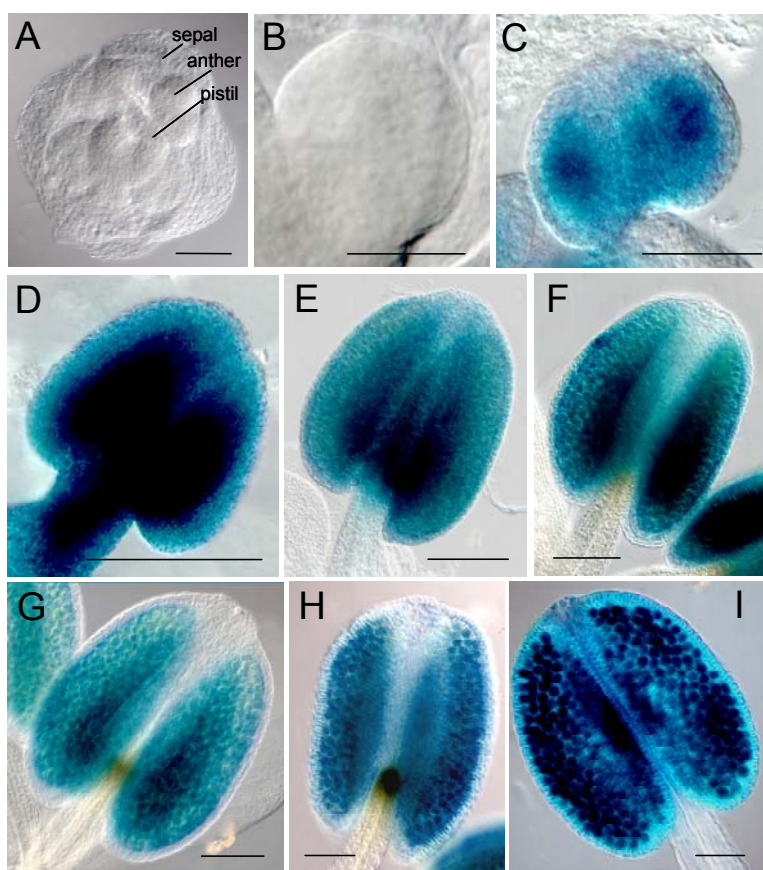

**Figure S2.** GUS expression pattern of the promoter::*GUS* fusion with *At5g40260* in developing anthers. GUS staining of tissues was performed with 5mM potassium ferri-, and ferrocyanide. After staining, anthers were cleared in Hoyer's solution (Liu and Meinke, 1998). Scale bars represent 50  $\mu\text{m}$  in A and D, 20  $\mu\text{m}$  in B and C, and 100  $\mu\text{m}$  in E~I. Floral stages, pollen or stamen developments were referred from papers of Regan and Moffatt (1990), Smyth et al (1990), Bowman et al (1991) and Ma (2005). GUS activity was not detected in flowers at floral stage 7 (A) including in the stamens (B). By contrast, GUS expression is strong within developing anthers of floral stages 8 to early 13 (C- I). A, Vertical view of a stage 7 bud. The flower bud shows that the stamens do not show locule ridges yet. B, Close-up of stamen of floral stage 7, in which archesporial cells divide to make sporogenous and primary parietal cells, did not show any GUS activity. C, Anther of floral stage 8, in which the stamen with visible locules differentiates to anther and filament, shows GUS activity. Especially, GUS expression is clear and strong in the pollen sacs containing microsporocytes. D, Stamen of floral stage early 9, in which microspore mother cells in anthers separate from each other and from tapetum by a callose wall. E, Stamen of floral stage late 9, in which microspore mother cells form tetrads by meiosis. F, Stamen of floral stage 10, during which microspores separate from callose wall and lie in the pollen sac and make round forms and epidermal cells of anther are clearly

distinguished. When GUS staining is performed with 7mM potassium ferri-, and ferrocyanide, no GUS activity is observed in the epidermal cells (data not shown). G, Anther of floral stage 11, in which microspores undergo mitotic division and tapetum of the pollen sac degenerates, shows weaker GUS staining than anthers of other floral stages. H, Anther of floral stage 12, in which microspores complete mitotic division and pollen grains desiccate and the tapetum disappears, shows strong GUS staining in the immature pollen. I, Anther of floral stage early 13, in which anther dehiscence occurs, shows strong GUS staining in the pollen. When GUS staining is performed using 7mM potassium ferri-, and ferrocyanide, GUS activity was clearly restricted to the pollen grains (data not shown).

**Table SI.** Correlation coefficients between the arrays

| Divison            | Early Staged Ovule       |                 |                 |                         |                         |                         | Late Staged Ovule |                  |                  |                         |                         |                         |                          |       |
|--------------------|--------------------------|-----------------|-----------------|-------------------------|-------------------------|-------------------------|-------------------|------------------|------------------|-------------------------|-------------------------|-------------------------|--------------------------|-------|
|                    | WT <sup>1</sup>          | WT <sup>2</sup> | WT <sup>3</sup> | <i>spl</i> <sup>1</sup> | <i>spl</i> <sup>2</sup> | <i>spl</i> <sup>3</sup> | WT <sup>d1</sup>  | WT <sup>d2</sup> | WT <sup>d3</sup> | <i>spl</i> <sup>1</sup> | <i>spl</i> <sup>2</sup> | <i>spl</i> <sup>3</sup> | <i>spl</i> <sup>d1</sup> |       |
| Early Staged Ovule | WT <sup>1</sup>          | -               |                 |                         |                         |                         |                   |                  |                  |                         |                         |                         |                          |       |
|                    | WT <sup>2</sup>          | 0.982           | -               |                         |                         |                         |                   |                  |                  |                         |                         |                         |                          |       |
|                    | WT <sup>3</sup>          | 0.980           | 0.985           | -                       |                         |                         |                   |                  |                  |                         |                         |                         |                          |       |
|                    | <i>spl</i> <sup>1</sup>  | 0.970           | 0.970           | 0.968                   | -                       |                         |                   |                  |                  |                         |                         |                         |                          |       |
|                    | <i>spl</i> <sup>2</sup>  | 0.973           | 0.978           | 0.973                   | 0.988                   | -                       |                   |                  |                  |                         |                         |                         |                          |       |
|                    | <i>spl</i> <sup>3</sup>  | 0.942           | 0.930           | 0.960                   | 0.989                   | 0.987                   | -                 |                  |                  |                         |                         |                         |                          |       |
| Late Staged Ovule  | WT <sup>d1</sup>         | 0.948           | 0.954           | 0.945                   | 0.939                   | 0.947                   | 0.942             | -                |                  |                         |                         |                         |                          |       |
|                    | WT <sup>d2</sup>         | 0.933           | 0.940           | 0.938                   | 0.922                   | 0.926                   | 0.930             | 0.976            | -                |                         |                         |                         |                          |       |
|                    | WT <sup>d3</sup>         | 0.955           | 0.958           | 0.955                   | 0.954                   | 0.954                   | 0.960             | 0.986            | 0.975            | -                       |                         |                         |                          |       |
|                    | <i>spl</i> <sup>1</sup>  | 0.943           | 0.951           | 0.943                   | 0.960                   | 0.957                   | 0.959             | 0.972            | 0.965            | 0.978                   | -                       |                         |                          |       |
|                    | <i>spl</i> <sup>2</sup>  | 0.944           | 0.951           | 0.941                   | 0.955                   | 0.961                   | 0.956             | 0.980            | 0.962            | 0.980                   | 0.987                   | -                       |                          |       |
|                    | <i>spl</i> <sup>3</sup>  | 0.936           | 0.950           | 0.940                   | 0.951                   | 0.958                   | 0.950             | 0.980            | 0.961            | 0.978                   | 0.987                   | 0.992                   | -                        |       |
|                    | <i>spl</i> <sup>d1</sup> | 0.941           | 0.950           | 0.945                   | 0.945                   | 0.950                   | 0.950             | 0.968            | 0.957            | 0.957                   | 0.973                   | 0.974                   | 0.972                    | -     |
|                    | <i>spl</i> <sup>d2</sup> | 0.977           | 0.960           | 0.957                   | 0.958                   | 0.962                   | 0.962             | 0.977            | 0.966            | 0.966                   | 0.982                   | 0.983                   | 0.983                    | 0.987 |

WT<sup>1-3</sup>, array of wild type siblings. *spl* 1-3, array of *spl* mutants. WT<sup>d1-d3</sup>, array of wild type siblings detached anthers. *spl*<sup>d1-d2</sup>, array of *spl* mutants detached anthers

**Table SII.** *Mutants analyzed for embryo sac phenotype*

| Gene ID <sup>a</sup> | Description                                 | Insertion Line | Position of Insertion |
|----------------------|---------------------------------------------|----------------|-----------------------|
| At1g26795            | Self-incompatibility protein-related        | SALK_124319    | Exon 1                |
| At1g36340            | Ubiquitin-conjugating enzyme, E2            | SALK_078556    | Intron 2              |
| At2g20070            | Hypothetical Protein                        | SALK_038499    | Exon 1                |
| At4g22050            | Aspartyl protease family protein            | SALK_033133    | Exon 1                |
| At4g30590            | Plastocyanin-like domain-containing protein | SALK_023946    | Exon 1                |
| At5g40260            | Nodulin MtN3 family protein                 | SALK_137176    | Exon 1                |
|                      |                                             | SALK_092239    | Exon 5                |

<sup>a</sup>*Arabidopsis* genome initiative number

**Table SIII.** Comparison with known genes involved in female gametophyte development

| Affymetrix Code <sup>i</sup> | Gene ID <sup>b</sup> | Description                                      | Early staged ovule |                           |                 |                      | Late staged ovule  |                             |                 |                      |
|------------------------------|----------------------|--------------------------------------------------|--------------------|---------------------------|-----------------|----------------------|--------------------|-----------------------------|-----------------|----------------------|
|                              |                      |                                                  | WT <sup>1-3</sup>  | <i>spl</i> <sup>1-3</sup> | FC <sup>c</sup> | P value <sup>d</sup> | WT <sup>d1-c</sup> | <i>spl</i> <sup>1-3,1</sup> | FC <sup>c</sup> | P value <sup>d</sup> |
| 255513_at                    | At4g02060            | PRL, DNA replication licensing factor Mcm7       | 460                | 475                       | 0.97            | 0.693433             | 385                | 406                         | 0.95            | 0.590369             |
| 248739_at                    | At5g48030            | GFA2, DNAJ heat shock protein                    | 321                | 412                       | 0.78            | 0.100869             | 350                | 420                         | 0.83            | 0.054093             |
| 264293_at                    | At1g78770            | NOMEGA, Cell division cycle family protein       | 194                | 221                       | 0.88            | 0.229354             | 195                | 207                         | 0.94            | 0.442491             |
| 260908_at                    | At1g02580            | MEA, maternal embryogenesis control protein      | 109                | 71                        | 1.53            | 0.024898             | <b>93</b>          | <b>55</b>                   | <b>1.67</b>     | <b>0.001022</b>      |
| 265801_at                    | At2g35670            | FIS2, Fertilization-independent seed 2 protein   | 39                 | 20                        | 1.95            | 0.022748             | <b>58</b>          | <b>16</b>                   | <b>3.55</b>     | <b>0.000000</b>      |
| 257987_at                    | At3g20740            | FIE, Fertilization-independent endosperm protein | 319                | 369                       | 0.86            | 0.170350             | 306                | 391                         | 0.78            | 0.064731             |

Footnotes are the same in Table2.

**Table SIV. Comparative information for embryo sac genes**

| Affymetrix Cod Gene ID <sup>b</sup> | Description                                               | Early Staged Ovule |                      | Late Staged Ovule |                      | Sporophytic Division <sup>c</sup> | Specific Transcriptome |                           |                           |
|-------------------------------------|-----------------------------------------------------------|--------------------|----------------------|-------------------|----------------------|-----------------------------------|------------------------|---------------------------|---------------------------|
|                                     |                                                           | FC <sup>c</sup>    | P value <sup>d</sup> | FC <sup>c</sup>   | P value <sup>d</sup> |                                   | Transcriptome          | FG <sup>f</sup> or Carpel | MG <sup>g</sup> or Stamen |
| Unknown protein                     |                                                           |                    |                      |                   |                      |                                   |                        |                           |                           |
| 261271_at                           | At1g26795 Self-incompatibility protein-related            | 25.3               | 0.000083             | 28.2              | 0.000000             | Both                              |                        |                           |                           |
| 265133_s_at                         | At1g51250 Expressed protein                               | 6.1                | 0.001456             | 28.2              | 0.000000             | Both                              |                        |                           | E                         |
| 259726_at                           | At1g60985 Expressed protein                               | 5.9                | 0.002140             | 21.4              | 0.000003             | Both                              | 0                      |                           |                           |
| 265762_at                           | At2g01240 Reticulon family protein (RTNLB15)              | 15.1               | 0.000418             | 10.3              | 0.000020             | Both                              | 0                      |                           |                           |
| 263713_at                           | At2g20595 Expressed protein                               | 18.9               | 0.003556             | 41.4              | 0.000000             | Both                              | 0                      |                           |                           |
| 267193_at                           | At2g30900 Expressed protein                               | 4.3                | 0.000554             | 5.4               | 0.000016             | Both                              | 0                      |                           | C                         |
| 256719_at                           | At2g34130 CACTA-like transposase family (Ptta/En/Spm)     | 10.3               | 0.000181             | 11.8              | 0.000000             | Both                              | 0                      |                           | A                         |
| 256600_at                           | At3g14850 Expressed protein                               | 7.6                | 0.000088             | 8.5               | 0.000000             | Both                              |                        |                           |                           |
| 257889_at                           | At3g17080 Self-incompatibility protein-related            | 6.2                | 0.002931             | 17.8              | 0.000000             | Both                              | 0                      |                           | C                         |
| 251698_at                           | At3g56610 Expressed protein                               | 32.0               | 0.004682             | 46.8              | 0.000000             | Both                              | 0                      |                           | C                         |
| 254257_s_at                         | At4g23350 Expressed protein                               | 3.5                | 0.003879             | 15.3              | 0.000000             | Both                              |                        |                           |                           |
| 253164_at                           | At4g35725 Expressed protein                               | 10.4               | 0.003044             | 21.2              | 0.000024             | Both                              |                        |                           |                           |
| 250871_at                           | At5g03930 Expressed protein                               | 7.0                | 0.001971             | 7.5               | 0.000002             | Both                              |                        |                           |                           |
| 250325_s_at                         | At5g12060 Self-incompatibility protein-related            | 3.4                | 0.001255             | 6.8               | 0.000001             | Both                              | 0                      |                           |                           |
| 249855_at                           | At5g22970 Expressed protein                               | 10.6               | 0.003517             | 31.7              | 0.000001             | Both                              |                        |                           | C                         |
| 249757_at                           | At5g24316 Proline-rich family protein                     | 27.7               | 0.001766             | 45.6              | 0.000000             | Both                              |                        |                           |                           |
| 249401_at                           | At5g40260 Nodulin MtN3 family protein                     | 15.2               | 0.000603             | 14.3              | 0.000004             | Both                              |                        |                           | E                         |
| 248284_at                           | At5g52975 Expressed protein                               | 9.3                | 0.000353             | 8.2               | 0.000001             | Both                              |                        |                           |                           |
| 262503_at                           | At1g21670 Expressed protein                               | 4.0                | 0.000009             | 1.4               | 0.031616             | Early                             |                        |                           |                           |
| 261731_s_at                         | At1g47780 Acyl-protein thioesterase-related               | 5.6                | 0.004140             | 4.7               | 0.000003             | Early                             | 0                      |                           | D                         |
| 249375_at                           | At5g40730 Arabinogalactan-protein (AGP24)                 | 6.2                | 0.000342             | 1.1               | 0.245297             | Early                             |                        |                           | E                         |
| 264610_at                           | At1g04645 Self-incompatibility protein-related            | 5.7                | 0.157950             | 38.1              | 0.000557             | Late                              |                        |                           |                           |
| 261846_at                           | At1g11540 Expressed protein                               | 1.4                | 0.117890             | 2.0               | 0.000012             | Late                              |                        |                           | C                         |
| 255908_s_at                         | At1g18010 Expressed protein                               | 2.0                | 0.018058             | 2.1               | 0.000005             | Late                              |                        |                           |                           |
| 256079_at                           | At1g20680 Expressed protein                               | 3.9                | 0.011798             | 5.7               | 0.000019             | Late                              | 0                      |                           |                           |
| 263027_at                           | At1g24010 Expressed protein                               | 1.9                | 0.256580             | 4.3               | 0.000001             | Late                              |                        |                           |                           |
| 260942_s_at                         | At1g45190 Expressed protein                               | 49.3               | 0.007497             | 47.1              | 0.000000             | Late                              | 0                      |                           |                           |
| 265138_at                           | At1g51300 Acyl-protein thioesterase-related               | 4.4                | 0.015275             | 9.1               | 0.000000             | Late                              |                        |                           |                           |
| 262314_at                           | At1g70810 C2 domain-containing protein                    | 1.4                | 0.182775             | 3.8               | 0.000004             | Late                              |                        |                           |                           |
| 262972_at                           | At1g75620 Glyoxal oxidase-related                         | 1.4                | 0.205253             | 3.5               | 0.000079             | Late                              |                        |                           |                           |
| 264297_at                           | At1g78710 Expressed protein                               | 1.9                | 0.005001             | 2.5               | 0.000001             | Late                              | 0                      |                           |                           |
| 267241_at                           | At2g02490 Hydroxyproline-rich glycoprotein family protein | 10.6               | 0.052466             | 37.0              | 0.000186             | Late                              | 0                      |                           | C                         |
| 267218_at                           | At2g02515 Expressed protein                               | 4.2                | 0.007206             | 24.8              | 0.000001             | Late                              | 0                      |                           |                           |
| 265517_at                           | At2g06090 Self-incompatibility protein-related            | 17.8               | 0.013973             | 47.4              | 0.000000             | Late                              |                        |                           | C                         |
| 264590_at                           | At2g17710 Expressed protein                               | 0.7                | 0.361347             | 2.1               | 0.000010             | Late                              |                        |                           |                           |
| 263518_at                           | At2g21655 Expressed protein                               | 15.8               | 0.015412             | 37.6              | 0.000001             | Late                              | 0                      |                           | C                         |
| 265674_at                           | At2g32190 Expressed protein                               | 1.6                | 0.072973             | 2.8               | 0.000267             | Late                              |                        |                           |                           |
| 265670_s_at                         | At2g32210 Expressed protein                               | 1.0                | 0.888298             | 2.8               | 0.000186             | Late                              |                        |                           |                           |
| 265245_at                           | At2g43060 Expressed protein                               | 0.9                | 0.564913             | 2.1               | 0.000340             | Late                              |                        |                           |                           |
| 259107_at                           | At3g05460 Sporozoite surface protein-related              | 9.4                | 0.008348             | 31.1              | 0.000069             | Late                              | 0                      |                           |                           |
| 258130_at                           | At3g24510 Expressed protein                               | 48.6               | 0.012987             | 53.8              | 0.000000             | Late                              | 0                      |                           | C                         |
| 252253_at                           | At3g49300 Proline-rich family protein                     | 6.0                | 0.007754             | 19.3              | 0.000044             | Late                              | 0                      |                           | D                         |
| 251606_at                           | At3g57840 Self-incompatibility protein-related            | 2.8                | 0.058391             | 12.4              | 0.000005             | Late                              |                        |                           |                           |
| 255207_at                           | At4g07515 Expressed protein                               | 19.8               | 0.008275             | 27.0              | 0.000000             | Late                              | 0                      |                           |                           |
| 245424_at                           | At4g17505 Expressed protein                               | 2.8                | 0.005099             | 9.4               | 0.000003             | Late                              | 0                      |                           | C                         |
| 254494_at                           | At4g20050 Expressed protein                               | 1.5                | 0.069310             | 3.9               | 0.000001             | Late                              |                        |                           | E                         |
| 254001_at                           | At4g26260 Expressed protein                               | 2.8                | 0.067591             | 5.9               | 0.000073             | Late                              | 0                      |                           | D, E                      |
| 253724_at                           | At4g29285 Expressed protein                               | 7.3                | 0.029036             | 39.5              | 0.000000             | Late                              |                        |                           |                           |
| 253656_at                           | At4g30090 Expressed protein                               | 1.2                | 0.276358             | 2.1               | 0.000137             | Late                              | 0                      |                           |                           |
| 253401_at                           | At4g32870 Expressed protein                               | 2.1                | 0.040870             | 4.3               | 0.000012             | Late                              |                        |                           |                           |
| 246641_s_at                         | At5g34885 Expressed protein                               | 10.3               | 0.025229             | 23.5              | 0.000000             | Late                              | 0                      |                           | D                         |
| 249179_at                           | At5g42955 Expressed protein                               | 19.3               | 0.014861             | 38.0              | 0.000000             | Late                              | 0                      |                           |                           |
| 248892_at                           | At5g46300 Expressed protein                               | 11.8               | 0.014887             | 23.1              | 0.000001             | Late                              | 0                      |                           |                           |
| Central intermediary metabolism     |                                                           |                    |                      |                   |                      |                                   |                        |                           |                           |
| 259786_at                           | At1g29660 GDSL-motif lipase/hydrolase family protein      | 3.4                | 0.003166             | 2.1               | 0.000131             | Both                              |                        |                           |                           |
| 260124_at                           | At1g36340 Ubiquitin-conjugating enzyme, E2                | 15.3               | 0.001661             | 13.8              | 0.000002             | Both                              | 0                      |                           | C                         |
| 245672_at                           | At1g56710 Glycoside hydrolase family 28 protein           | 2.6                | 0.004220             | 2.5               | 0.000298             | Both                              |                        |                           | C                         |
| 257442_at                           | At2g28680 Cupin family protein                            | 6.8                | 0.001424             | 9.2               | 0.000008             | Both                              | 0                      |                           | D, E                      |
| 267408_at                           | At2g34890 CTP synthase, putative                          | 6.1                | 0.000651             | 4.2               | 0.000011             | Both                              | 0                      |                           |                           |
| 257243_at                           | At3g24230 Pectate lyase family protein                    | 5.7                | 0.003792             | 3.2               | 0.000001             | Both                              |                        |                           |                           |
| 258763_s_at                         | At3g30540 (1-4)-beta-mannan endohydrolase family          | 15.9               | 0.002254             | 17.4              | 0.000000             | Both                              | 0                      |                           |                           |
| 252342_at                           | At3g48950 Glycoside hydrolase family 28 protein           | 11.6               | 0.001576             | 23.3              | 0.000000             | Both                              | 0                      |                           |                           |
| 248925_at                           | At5g45910 GDSL-motif lipase/ hydrolase-like protein       | 20.0               | 0.001613             | 53.5              | 0.000000             | Both                              |                        |                           | C                         |
| 247228_at                           | At5g65140 Trehalose-6-phosphate phosphatase               | 8.0                | 0.000647             | 2.7               | 0.000044             | Both                              |                        |                           |                           |
| 264147_at                           | At1g02200 CER1 protein                                    | 2.4                | 0.000205             | 1.0               | 0.799875             | Early                             |                        |                           |                           |
| 264146_at                           | At1g02205 CER1 protein, At1g02200                         | 2.3                | 0.000021             | 1.0               | 0.820363             | Early                             |                        |                           |                           |
| 259703_at                           | At1g77790 Glycosyl hydrolase family 17 protein            | 7.0                | 0.000428             | 4.8               | 0.000000             | Early                             |                        |                           |                           |
| 267202_s_at                         | At2g31030 Oxysterol-binding family protein                | 7.3                | 0.000864             | 3.8               | 0.000005             | Early                             |                        |                           |                           |
| 260611_at                           | At2g43670 Glycosyl hydrolase family 17 protein            | 2.5                | 0.002326             | 1.7               | 0.000212             | Early                             |                        |                           |                           |
| 252320_at                           | At3g48580 Xyloglucan:xyloglucosyl transferase, putative   | 2.4                | 0.003795             | 1.5               | 0.004917             | Early                             |                        |                           |                           |
| 250082_at                           | At5g17200 Glycoside hydrolase family 28 protein           | 4.2                | 0.002910             | 1.8               | 0.000578             | Early                             |                        |                           |                           |

(Table continues on the following page.)



**Table SIV.** (Continued from previous page.)

| Affymetrix Cod Gene ID <sup>b</sup>         | Description                                                     | Early Staged Ovule |                      | Late Staged Ovule |                      | Division <sup>c</sup> | Sporophytic Transcriptome | Specific Transcriptome    |                           |
|---------------------------------------------|-----------------------------------------------------------------|--------------------|----------------------|-------------------|----------------------|-----------------------|---------------------------|---------------------------|---------------------------|
|                                             |                                                                 | FC <sup>c</sup>    | P value <sup>d</sup> | FC <sup>c</sup>   | P value <sup>d</sup> |                       |                           | FG <sup>e</sup> or Carpel | MG <sup>f</sup> or Stamen |
| Central intermediary metabolism (continued) |                                                                 |                    |                      |                   |                      |                       |                           |                           |                           |
| 260947_at                                   | At1g06020 PfkB-type carbohydrate kinase family protein          | 1.5                | 0.010463             | 2.6               | 0.000134             | Late                  | 0                         |                           |                           |
| 259391_s_at                                 | At1g06350 Fatty acid desaturase family protein                  | 1.7                | 0.342723             | 2.2               | 0.000376             | Late                  |                           |                           |                           |
| 255956_at                                   | At1g22015 Galactosyltransferase family protein                  | 3.7                | 0.007113             | 8.0               | 0.000000             | Late                  | 0                         |                           |                           |
| 245792_at                                   | At1g32100 Pinoresinol-lariciresinol reductase, putative         | 1.0                | 0.993453             | 2.7               | 0.000127             | Late                  |                           |                           |                           |
| 245794_at                                   | At1g32170 Xyloglucan:xyloglucosyl transferase, putative         | 1.2                | 0.363717             | 2.1               | 0.000150             | Late                  |                           |                           |                           |
| 256211_at                                   | At1g50960 Gibberellin 20-oxidase-related                        | 2.2                | 0.015340             | 5.4               | 0.000000             | Late                  |                           |                           |                           |
| 260333_at                                   | At1g70500 Polygalacturonase, putative / Pectinase, putative     | 21.7               | 0.007959             | 16.0              | 0.000001             | Late                  |                           |                           |                           |
| 260066_at                                   | At1g73610 GDSL-motif lipase/hydrolase family protein            | 2.9                | 0.035163             | 8.0               | 0.000056             | Late                  |                           |                           |                           |
| 260259_at                                   | At1g74300 Esterase/lipase/thioesterase family protein           | 1.1                | 0.690243             | 2.2               | 0.000095             | Late                  | 0                         |                           |                           |
| 265331_at                                   | At2g18420 Gibberellin-responsive protein, putative              | 1.1                | 0.777953             | 4.1               | 0.000139             | Late                  |                           |                           | E                         |
| 267607_s_at                                 | At2g26740 Epoxide hydrolase, soluble (sEH)                      | 1.0                | 0.977676             | 2.4               | 0.000242             | Late                  |                           |                           |                           |
| 267337_at                                   | At2g39980 Transferase family protein                            | 2.0                | 0.015251             | 2.3               | 0.000006             | Late                  |                           |                           |                           |
| 260559_at                                   | At2g43860 Polygalacturonase, putative / Pectinase, putative     | 3.0                | 0.005920             | 2.3               | 0.000032             | Late                  | 0                         |                           |                           |
| 258767_at                                   | At3g10890 (1-4)-beta-mannan endohydrolase, putative             | 6.3                | 0.013753             | 35.1              | 0.000002             | Late                  | 0                         |                           | E                         |
| 258151_at                                   | At3g18080 Glycosyl hydrolase family I protein                   | 1.0                | 0.899935             | 3.1               | 0.000003             | Late                  |                           |                           |                           |
| 257065_at                                   | At3g18220 Phosphatidic acid phosphatase family protein          | 1.5                | 0.034020             | 2.8               | 0.000003             | Late                  | 0                         |                           | D                         |
| 251491_at                                   | At3g59480 PfkB-type carbohydrate kinase family protein          | 9.9                | 0.032782             | 2.8               | 0.001882             | Late                  |                           |                           | E                         |
| 255550_at                                   | At4g01970 Galactinol-raffinose galactosyltransferase, putative  | 3.1                | 0.006794             | 2.7               | 0.000170             | Late                  | 0                         |                           |                           |
| 245349_at                                   | At4g16690 Esterase/ lipase/ thioesterase family protein         | 1.9                | 0.193063             | 2.1               | 0.000368             | Late                  |                           |                           |                           |
| 254609_at                                   | At4g18970 GDSL-motif lipase/hydrolase family protein            | 0.9                | 0.189942             | 2.3               | 0.000085             | Late                  |                           |                           |                           |
| 246498_at                                   | At5g16230 Acyl-[acyl-carrier-protein] desaturase, putative      | 1.3                | 0.219929             | 3.6               | 0.001229             | Late                  |                           |                           |                           |
| 249983_at                                   | At5g18470 Curculin-like (mannose-binding) lectin family protein | 1.2                | 0.486888             | 2.2               | 0.001507             | Late                  |                           |                           |                           |
| 246774_at                                   | At5g27530 Glycoside hydrolase family 28 protein                 | 2.4                | 0.012277             | 4.8               | 0.000001             | Late                  | 0                         |                           | D                         |
| 249474_s_at                                 | At5g39190 Germin-like protein (GER2)                            | 1.2                | 0.500732             | 7.6               | 0.000004             | Late                  |                           |                           |                           |
| 248812_at                                   | At5g47330 Palmitoyl protein thioesterase family protein         | 0.8                | 0.143704             | 4.7               | 0.000004             | Late                  |                           |                           |                           |
| 248791_at                                   | At5g47350 Palmitoyl protein thioesterase family protein         | 3.3                | 0.040644             | 4.0               | 0.000003             | Late                  |                           |                           |                           |
| Hypothetical protein                        |                                                                 |                    |                      |                   |                      |                       |                           |                           |                           |
| 260318_at                                   | At1g63960 Hypothetical Protein                                  | 3.2                | 0.002924             | 3.5               | 0.000014             | Both                  | 0                         |                           |                           |
| 265579_at                                   | At2g20070 Hypothetical Protein                                  | 13.8               | 0.000041             | 13.4              | 0.000000             | Both                  | 0                         |                           |                           |
| 257434_at                                   | At2g21740 Hypothetical Protein                                  | 5.0                | 0.001238             | 15.3              | 0.000000             | Both                  | 0                         |                           |                           |
| 252753_at                                   | At3g43500 Hypothetical Protein                                  | 4.0                | 0.002002             | 6.6               | 0.000002             | Both                  | 0                         |                           |                           |
| 246859_at                                   | At5g25950 Hypothetical Protein                                  | 5.4                | 0.000045             | 10.9              | 0.000000             | Both                  | 0                         |                           |                           |
| 248225_at                                   | At5g53740 Hypothetical Protein                                  | 2.3                | 0.000851             | 2.1               | 0.000065             | Both                  |                           |                           |                           |
| 266706_at                                   | At2g03320 Hypothetical protein                                  | 3.5                | 0.001116             | 2.8               | 0.000175             | Early                 | 0                         |                           |                           |
| 246866_at                                   | At5g25960 Hypothetical protein                                  | 11.7               | 0.000000             | 4.8               | 0.000020             | Early                 |                           |                           |                           |
| 248396_at                                   | At5g52130 Hypothetical protein                                  | 5.4                | 0.000609             | 3.2               | 0.000216             | Early                 | 0                         |                           |                           |
| 257468_at                                   | At1g47470 Hypothetical protein                                  | 11.2               | 0.029273             | 40.1              | 0.000000             | Late                  | 0                         |                           |                           |
| 261313_at                                   | At1g52970 Hypothetical protein                                  | 9.9                | 0.007905             | 32.1              | 0.000000             | Late                  |                           |                           |                           |
| 259944_at                                   | At1g71470 Hypothetical protein                                  | 1.2                | 0.213121             | 2.1               | 0.000104             | Late                  |                           |                           |                           |
| 263895_at                                   | At2g21920 Hypothetical protein                                  | 4.2                | 0.007542             | 4.2               | 0.000906             | Late                  |                           |                           |                           |
| 258798_at                                   | At3g04540 Hypothetical protein                                  | 3.7                | 0.087047             | 30.9              | 0.000000             | Late                  | 0                         |                           | C                         |
| 256773_at                                   | At3g13630 Hypothetical protein                                  | 1.1                | 0.715677             | 2.2               | 0.000839             | Late                  | 0                         |                           | D                         |
| 251607_at                                   | At3g57850 Hypothetical protein                                  | 6.6                | 0.036056             | 29.4              | 0.000050             | Late                  | 0                         |                           |                           |
| 255029_x_at                                 | At4g09470 Hypothetical protein                                  | 17.2               | 0.012714             | 43.5              | 0.000003             | Late                  |                           |                           |                           |
| 255804_at                                   | At4g10220 Hypothetical protein                                  | 3.9                | 0.009652             | 12.0              | 0.000003             | Late                  | 0                         |                           | D                         |
| 254692_at                                   | At4g17860 Hypothetical protein                                  | 1.7                | 0.028983             | 3.9               | 0.000008             | Late                  |                           |                           |                           |
| 246472_at                                   | At5g17130 Hypothetical protein                                  | 1.0                | 0.853233             | 2.2               | 0.000487             | Late                  | 0                         |                           |                           |
| 249157_at                                   | At5g43510 Hypothetical protein                                  | 27.3               | 0.012178             | 20.1              | 0.000001             | Late                  | 0                         |                           |                           |
| 247245_at                                   | At5g64720 Hypothetical protein                                  | 6.9                | 0.010392             | 24.5              | 0.000000             | Late                  | 0                         |                           |                           |
| Detoxification/ stress response             |                                                                 |                    |                      |                   |                      |                       |                           |                           |                           |
| 264001_at                                   | At2g22420 Peroxidase 17 (PER17)                                 | 6.5                | 0.003718             | 6.1               | 0.000007             | Both                  |                           |                           | B                         |
| 265264_at                                   | At2g42930 Glycosyl hydrolase family protein 17                  | 6.3                | 0.003492             | 8.5               | 0.000007             | Both                  | 0                         |                           | C                         |
| 254000_at                                   | At4g26250 Galactinol synthase induced by water stress           | 4.8                | 0.003892             | 4.2               | 0.000004             | Both                  | 0                         |                           |                           |
| 252951_at                                   | At4g38700 Disease resistance-responsive family protein          | 2.3                | 0.004228             | 6.2               | 0.000000             | Both                  |                           |                           |                           |
| 247857_at                                   | At5g58400 Peroxidase, putative                                  | 4.4                | 0.000004             | 2.9               | 0.000023             | Both                  |                           |                           | C                         |
| 261410_at                                   | At1g07610 Metallothionein-like protein 1C (MT-1C)               | 2.1                | 0.000832             | 1.4               | 0.168590             | Early                 |                           |                           | E                         |
| 266743_at                                   | At2g02990 Ribonuclease 1 (RNS1)                                 | 2.9                | 0.001354             | 1.4               | 0.201557             | Early                 |                           |                           | E                         |
| 263026_at                                   | At1g24000 Bet v 1 allergen family protein                       | 2.9                | 0.266278             | 12.9              | 0.000001             | Late                  | 0                         |                           |                           |
| 265920_s_at                                 | At2g15120 Pseudogene, disease-resistance family protein         | 1.1                | 0.299880             | 4.6               | 0.000933             | Late                  |                           |                           |                           |
| 266562_at                                   | At2g23970 Defense-related protein, putative                     | 1.1                | 0.479766             | 5.1               | 0.000000             | Late                  | 0                         |                           | D, E                      |
| 267138_s_at                                 | At2g38210 Ethylene-responsive protein, putative                 | 2.1                | 0.091609             | 3.2               | 0.001233             | Late                  |                           |                           |                           |
| 266169_at                                   | At2g38900 Serine protease inhibitor                             | 1.1                | 0.867313             | 3.3               | 0.000002             | Late                  | 0                         |                           |                           |
| 260557_at                                   | At2g43610 Glycoside hydrolase family 19 protein                 | 1.9                | 0.003261             | 2.3               | 0.000002             | Late                  |                           |                           |                           |
| 258791_at                                   | At3g04720 Hevein-like protein (HEL)                             | 1.0                | 0.937369             | 2.6               | 0.003414             | Late                  |                           |                           |                           |
| 258172_at                                   | At3g21620 Early-responsive to dehydration protein-related       | 2.5                | 0.000597             | 3.2               | 0.000002             | Late                  |                           |                           |                           |
| 254098_at                                   | At4g25100 Superoxide dismutase (Fe), chloroplast (SODB)         | 2.2                | 0.060518             | 5.6               | 0.000220             | Late                  |                           |                           |                           |
| 253655_at                                   | At4g30070 Plant defensin-fusion protein, putative               | 2.5                | 0.007716             | 7.4               | 0.000001             | Late                  | 0                         |                           |                           |
| 250200_at                                   | At5g14130 Peroxidase, putative                                  | 1.4                | 0.229669             | 2.6               | 0.000012             | Late                  |                           |                           |                           |
| 250083_at                                   | At5g17220 Glutathione S-transferase-like protein                | 1.1                | 0.870900             | 2.3               | 0.000020             | Late                  |                           |                           |                           |
| 249560_at                                   | At5g38330 Plant defensin-fusion protein, putative               | 11.0               | 0.008435             | 39.5              | 0.000000             | Late                  | 0                         |                           |                           |
| 249527_at                                   | At5g38710 Proline oxidase, putative                             | 3.9                | 0.006176             | 4.8               | 0.000019             | Late                  |                           |                           |                           |

(Table continues on the following page.)

**Table SIV.** (Continued from previous page.)

| Affymetrix Cod Gene ID <sup>b</sup> | Description                                                      | Early Staged Ovule |                      | Late Staged Ovule |                      | Sporophytic Division <sup>c</sup> | Specific Transcriptome |                           |                           |
|-------------------------------------|------------------------------------------------------------------|--------------------|----------------------|-------------------|----------------------|-----------------------------------|------------------------|---------------------------|---------------------------|
|                                     |                                                                  | FC <sup>e</sup>    | P value <sup>d</sup> | FC <sup>e</sup>   | P value <sup>d</sup> |                                   | Transcriptome          | FG <sup>f</sup> or Carpel | MG <sup>g</sup> or Stamen |
| Cell structure organization         |                                                                  |                    |                      |                   |                      |                                   |                        |                           |                           |
| 260573_at                           | At2g47280 Pectinesterase family protein                          | 6.4                | 0.000454             | 5.5               | 0.000000             | Both                              | 0                      |                           | D                         |
| 257878_at                           | At3g17150 Invertase/pectin methylesterase inhibitor family       | 15.3               | 0.004375             | 29.2              | 0.000000             | Both                              | 0                      | C                         |                           |
| 258438_at                           | At3g17230 Invertase/pectin methylesterase inhibitor family       | 14.4               | 0.000924             | 24.8              | 0.000000             | Both                              | 0                      |                           |                           |
| 251748_at                           | At3g55680 Invertase/pectin methylesterase inhibitor family       | 3.2                | 0.000901             | 2.8               | 0.000002             | Both                              | 0                      |                           |                           |
| 255699_at                           | At4g00190 Putative pectinesterase                                | 2.8                | 0.001537             | 3.7               | 0.000001             | Both                              | 0                      |                           |                           |
| 248823_s_at                         | At5g46960 Invertase/pectin methylesterase inhibitor family       | 35.1               | 0.002890             | 39.4              | 0.000003             | Both                              | 0                      |                           |                           |
| 247246_at                           | At5g64620 Invertase/pectin methylesterase inhibitor family       | 2.2                | 0.000298             | 2.0               | 0.000000             | Both                              | 0                      |                           |                           |
| 260802_at                           | At1g78400 Glycoside hydrolase family 28 protein                  | 8.8                | 0.000001             | 1.7               | 0.001391             | Early                             | 0                      |                           | D                         |
| 258764_at                           | At3g10720 Pectinesterase, putative                               | 2.0                | 0.001974             | 1.5               | 0.008263             | Early                             | 0                      | C                         |                           |
| 253725_at                           | At4g29340 Profilin 3 (PRO3) (PFN3)                               | 2.3                | 0.000446             | 1.1               | 0.244366             | Early                             | 0                      |                           | E                         |
| 264500_at                           | At1g09370 Pectinesterase inhibitor domain-containing protein     | 6.0                | 0.123949             | 43.8              | 0.000012             | Late                              | 0                      |                           |                           |
| 259613_at                           | At1g48010 Invertase/pectin methylesterase inhibitor family       | 1.1                | 0.597625             | 3.6               | 0.000000             | Late                              | 0                      |                           |                           |
| 262083_at                           | At1g56100 Pectinesterase inhibitor domain-containing protein     | 2.4                | 0.444629             | 3.5               | 0.000012             | Late                              | 0                      |                           |                           |
| 245656_at                           | At1g56620 Pectinesterase inhibitor domain-containing protein     | 1.9                | 0.044275             | 13.3              | 0.000000             | Late                              | 0                      |                           |                           |
| 257679_at                           | At3g20470 Pseudogene, glycine-rich protein                       | 1.2                | 0.700308             | 2.2               | 0.001050             | Late                              | 0                      | C                         |                           |
| 245371_at                           | At4g15750 Invertase/pectin methylesterase inhibitor family       | 3.2                | 0.067454             | 3.1               | 0.000004             | Late                              | 0                      |                           |                           |
| 249962_at                           | At5g18990 Pectinesterase family protein                          | 2.0                | 0.028245             | 5.5               | 0.000041             | Late                              | 0                      |                           |                           |
| 247377_at                           | At5g63180 Pectate lyase family protein                           | 1.4                | 0.147262             | 2.1               | 0.000518             | Late                              | 0                      |                           |                           |
| Transport                           |                                                                  |                    |                      |                   |                      |                                   |                        |                           |                           |
| 260319_at                           | At1g63950 Heavy-metal-associated domain-containing protein       | 10.9               | 0.002905             | 7.9               | 0.000001             | Both                              | 0                      |                           |                           |
| 259757_at                           | At1g77510 Protein disulfide isomerase, putative                  | 2.6                | 0.000344             | 2.6               | 0.000170             | Both                              | 0                      | B                         |                           |
| 258760_at                           | At3g10780 Emp24/gp25L/p24 family protein                         | 4.6                | 0.001770             | 5.4               | 0.000000             | Both                              | 0                      | C                         |                           |
| 245892_at                           | At5g09370 Protease inhibitor/seed storage/lipid transfer protein | 6.8                | 0.004630             | 12.3              | 0.000002             | Both                              | 0                      |                           |                           |
| 263765_at                           | At2g21540 SEC14 cytosolic factor, putative                       | 2.1                | 0.000985             | 1.5               | 0.002042             | Early                             | 0                      | C                         |                           |
| 249346_at                           | At5g40780 Sugar transporter, putative                            | 4.6                | 0.002599             | 1.4               | 0.054790             | Early                             | 0                      |                           |                           |
| 264520_at                           | At1g10010 Lysine and histidine specific transporter, putative    | 2.6                | 0.005939             | 4.8               | 0.000000             | Late                              | 0                      |                           |                           |
| 265002_at                           | At1g24400 Amino acid permease, putative                          | 3.8                | 0.024933             | 2.2               | 0.000005             | Late                              | 0                      |                           | E                         |
| 259580_at                           | At1g28030 Lysine and histidine specific transporter              | 1.2                | 0.276557             | 3.0               | 0.000024             | Late                              | 0                      |                           |                           |
| 265064_at                           | At1g61630 Oxidoreductase, 2OG-Fe(II) oxygenase family protein    | 1.7                | 0.013220             | 2.3               | 0.000179             | Late                              | 0                      |                           | D, E                      |
| 259844_at                           | At1g73560 Equilibrative nucleoside transporter, putative (ENT7)  | 2.2                | 0.005234             | 4.9               | 0.000122             | Late                              | 0                      |                           |                           |
| 264482_at                           | At1g77210 Protease inhibitor/seed storage/lipid transfer protein | 1.1                | 0.601658             | 2.1               | 0.000012             | Late                              | 0                      |                           |                           |
| 257366_s_at                         | At2g03040 Sugar transporter, putative                            | 4.1                | 0.005632             | 8.3               | 0.000008             | Late                              | 0                      |                           |                           |
| 266276_at                           | At2g29330 Transmembrane protein-related                          | 2.3                | 0.007410             | 2.4               | 0.000243             | Late                              | 0                      |                           |                           |
| 254453_at                           | At4g21120 Tropinone reductase, putative                          | 3.3                | 0.007991             | 2.9               | 0.000000             | Late                              | 0                      |                           | E                         |
| 246887_at                           | At5g26250 Amino acid permease family protein                     | 2.6                | 0.015475             | 4.0               | 0.000013             | Late                              | 0                      |                           | D                         |
| 248275_at                           | At5g53520 Oligopeptide transporter OPT family protein            | 1.3                | 0.204722             | 3.9               | 0.000002             | Late                              | 0                      |                           | D                         |
| 248019_at                           | At5g56480 Protease inhibitor/seed storage/lipid transfer protein | 1.2                | 0.206709             | 2.9               | 0.000015             | Late                              | 0                      |                           |                           |
| Protein degradation                 |                                                                  |                    |                      |                   |                      |                                   |                        |                           |                           |
| 256486_at                           | At1g31450 Aspartyl protease family protein                       | 14.8               | 0.001311             | 35.1              | 0.000000             | Both                              | 0                      |                           |                           |
| 245738_at                           | At1g44130 Nucellin protein, putative                             | 12.3               | 0.002988             | 11.2              | 0.000067             | Both                              | 0                      |                           |                           |
| 259368_at                           | At1g69100 Aspartyl protease family protein                       | 42.6               | 0.003756             | 29.1              | 0.000000             | Both                              | 0                      |                           |                           |
| 252499_s_at                         | At3g46840 Subtilase family protein                               | 11.6               | 0.000398             | 17.2              | 0.000001             | Both                              | 0                      |                           |                           |
| 245589_at                           | At4g15040 Subtilase family protein                               | 7.3                | 0.000154             | 4.0               | 0.000055             | Both                              | 0                      |                           |                           |
| 254336_at                           | At4g22050 Aspartyl protease family protein                       | 18.3               | 0.000096             | 10.6              | 0.000000             | Both                              | 0                      |                           |                           |
| 246684_at                           | At5g33340 Aspartyl protease family protein                       | 4.0                | 0.000228             | 9.1               | 0.000001             | Both                              | 0                      |                           |                           |
| 247798_at                           | At5g58830 Subtilase family protein                               | 5.0                | 0.002673             | 17.7              | 0.000000             | Both                              | 0                      |                           |                           |
| 254237_at                           | At4g23520 Cysteine proteinase, putative                          | 2.4                | 0.000243             | 1.9               | 0.000254             | Early                             | 0                      |                           |                           |
| 247697_at                           | At5g59810 Subtilase family protein                               | 2.1                | 0.002288             | 1.3               | 0.003872             | Early                             | 0                      | C                         |                           |
| 264067_x_at                         | At2g28010 Aspartyl protease family protein                       | 1.7                | 0.039844             | 5.9               | 0.000004             | Late                              | 0                      |                           |                           |
| 250345_at                           | At5g11940 Subtilase family protein                               | 3.9                | 0.005591             | 11.4              | 0.000000             | Late                              | 0                      |                           | D                         |
| Signal transduction                 |                                                                  |                    |                      |                   |                      |                                   |                        |                           |                           |
| 263740_at                           | At2g20660 Rapid alkalization factor (RALF) family protein        | 2.4                | 0.000758             | 3.8               | 0.000000             | Both                              | 0                      |                           |                           |
| 245158_at                           | At2g33130 RALF family protein                                    | 12.8               | 0.000989             | 11.4              | 0.000000             | Both                              | 0                      |                           |                           |
| 266418_at                           | At2g38750 Annexin 4 (ANN4)                                       | 4.4                | 0.003825             | 3.3               | 0.000001             | Both                              | 0                      |                           |                           |
| 251514_at                           | At3g59260 Pirin, putative                                        | 6.1                | 0.001924             | 5.7               | 0.000002             | Both                              | 0                      |                           |                           |
| 255489_at                           | At4g02650 Epsin N-terminal homology domain-containing protei     | 20.7               | 0.004357             | 39.8              | 0.000000             | Both                              | 0                      |                           | D, E                      |
| 245177_at                           | At5g12380 Annexin, putative                                      | 11.2               | 0.000393             | 12.8              | 0.000000             | Both                              | 0                      |                           |                           |
| 249013_at                           | At5g44700 Leucine-rich repeat transmembrane protein kinase       | 2.6                | 0.001303             | 2.5               | 0.000305             | Both                              | 0                      | A                         | E                         |
| 261285_at                           | At1g35720 Annexin 1 (ANN1)                                       | 1.4                | 0.273697             | 3.6               | 0.000012             | Late                              | 0                      |                           |                           |
| 257869_at                           | At3g25160 ER lumen protein retaining receptor family protein     | 1.7                | 0.030431             | 2.8               | 0.000020             | Late                              | 0                      |                           |                           |
| 250090_at                           | At5g17330 Glutamate decarboxylase 1 (GAD 1)                      | 9.2                | 0.005864             | 9.0               | 0.000000             | Late                              | 0                      | B                         |                           |
| Energy metabolism                   |                                                                  |                    |                      |                   |                      |                                   |                        |                           |                           |
| 259268_at                           | At3g01070 Plastocyanin-like domain-containing protein            | 2.8                | 0.002166             | 4.8               | 0.000001             | Both                              | 0                      |                           |                           |
| 253634_at                           | At4g30590 Plastocyanin-like domain-containing protein            | 12.6               | 0.000057             | 12.3              | 0.000005             | Both                              | 0                      | C                         |                           |
| 252897_at                           | At4g39490 Cytochrome P450 family protein, At4g38480              | 3.4                | 0.004614             | 7.5               | 0.000000             | Both                              | 0                      |                           |                           |
| 248236_at                           | At5g53870 Plastocyanin-like domain-containing protein            | 20.7               | 0.000394             | 4.0               | 0.000009             | Both                              | 0                      |                           |                           |
| 262528_at                           | At1g17260 ATPase 10, plasma membrane-type, putative              | 1.7                | 0.385722             | 3.4               | 0.000002             | Late                              | 0                      |                           |                           |
| 261396_at                           | At1g79800 Plastocyanin-like domain-containing protein            | 1.2                | 0.236124             | 2.2               | 0.000064             | Late                              | 0                      |                           | D, E                      |
| 266563_at                           | At2g23990 Plastocyanin-like domain-containing protein            | 4.2                | 0.011017             | 23.3              | 0.000015             | Late                              | 0                      |                           |                           |
| 255690_at                           | At4g00360 Cytochrome P450, putative                              | 2.1                | 0.018309             | 2.7               | 0.000026             | Late                              | 0                      |                           |                           |
| 254489_at                           | At4g20800 FAD-binding domain-containing protein                  | 4.4                | 0.027803             | 11.3              | 0.000000             | Late                              | 0                      |                           |                           |

(Table continues on the following page.)

**Table SIV.** (Continued from previous page.)

| Affymetrix Cod Gene ID <sup>b</sup> | Description                                            | Early Staged Ovule |                      | Late Staged Ovule |                      | Sporophytic Division <sup>c</sup> | Sporophytic Transcriptome | Specific Transcriptome    |                           |
|-------------------------------------|--------------------------------------------------------|--------------------|----------------------|-------------------|----------------------|-----------------------------------|---------------------------|---------------------------|---------------------------|
|                                     |                                                        | FC <sup>e</sup>    | P value <sup>d</sup> | FC <sup>e</sup>   | P value <sup>d</sup> |                                   |                           | FG <sup>f</sup> or Carpel | MG <sup>g</sup> or Stamen |
| Transcriptional regulation          |                                                        |                    |                      |                   |                      |                                   |                           |                           |                           |
| 267528_at                           | At2g45650 MADS-box protein (AGL6)                      | 4.2                | 0.002904             | 2.1               | 0.000048             | Both                              | 0                         |                           |                           |
| 249338_at                           | At5g41090 No apical meristem (NAM) family protein      | 9.1                | 0.000764             | 5.8               | 0.000000             | Both                              | 0                         |                           | E                         |
| 260212_at                           | At1g74480 RWP-RK domain-containing protein             | 1.5                | 0.071151             | 2.2               | 0.001510             | Late                              |                           |                           |                           |
| 266969_at                           | At2g39540 Gibberellin-regulated family protein         | 1.1                | 0.593532             | 5.6               | 0.000003             | Late                              |                           |                           |                           |
| 254619_at                           | At4g18770 Myb family transcription factor (MYB98)      | 1.8                | 0.063530             | 2.7               | 0.000002             | Late                              | 0                         |                           |                           |
| 251114_at                           | At5g01380 Expressed protein                            | 1.0                | 0.855505             | 2.7               | 0.000211             | Late                              |                           |                           |                           |
| 248240_at                           | At5g53950 No apical meristem (NAM) family protein      | 1.1                | 0.399544             | 2.4               | 0.000013             | Late                              |                           |                           |                           |
| Secondary metabolism                |                                                        |                    |                      |                   |                      |                                   |                           |                           |                           |
| 260386_at                           | At1g74010 Strictosidine synthase family protein        | 5.1                | 0.001313             | 16.4              | 0.000010             | Both                              |                           |                           |                           |
| 264401_at                           | At1g61720 Dihydroflavonol 4-reductase family (BAN)     | 1.2                | 0.693582             | 3.0               | 0.000017             | Late                              | 0                         |                           |                           |
| 260335_at                           | At1g74000 Strictosidine synthase family protein        | 2.0                | 0.005947             | 2.7               | 0.000038             | Late                              |                           |                           | E                         |
| 254283_s_at                         | At4g22870 Leucoanthocyanidin dioxygenase, putative     | 1.0                | 0.880918             | 2.3               | 0.000118             | Late                              | 0                         |                           |                           |
| 249215_at                           | At5g42800 Dihydroflavonol 4-reductase                  | 1.2                | 0.546725             | 3.6               | 0.000030             | Late                              |                           |                           |                           |
| Plant development/ Organogenesis    |                                                        |                    |                      |                   |                      |                                   |                           |                           |                           |
| 262113_at                           | At1g02820 Late embryogenesis abundant 3 family protein | 2.5                | 0.000057             | 2.8               | 0.000001             | Both                              |                           |                           |                           |
| 262659_at                           | At1g14240 Nucleoside phosphatase family protein        | 3.3                | 0.000911             | 5.8               | 0.000000             | Both                              |                           |                           |                           |
| 262549_at                           | At1g31290 PAZ domain-containing protein                | 1.4                | 0.096043             | 2.7               | 0.000011             | Late                              |                           |                           |                           |
| 252234_at                           | At3g49780 Phytosulfokines 3 (PSK3)                     | 2.0                | 0.386279             | 3.8               | 0.000014             | Late                              |                           |                           |                           |
| 251301_at                           | At3g61880 Cytochrome p450, putative                    | 1.9                | 0.003809             | 2.2               | 0.000032             | Late                              |                           |                           |                           |
| Protein biosynthesis/ DNA catbolism |                                                        |                    |                      |                   |                      |                                   |                           |                           |                           |
| 245883_at                           | At5g09500 40S ribosomal protein S15 (RPS15C)           | 4.7                | 0.002080             | 5.9               | 0.000028             | Early                             | 0                         |                           | D, E                      |
| 260438_at                           | At1g68290 Bifunctional nuclease, putative              | 1.6                | 0.093917             | 5.9               | 0.000104             | Late                              |                           |                           |                           |

Genes were selected on the basis of the P value of <0.0050, fold change of > 2.0, and signal intensity of >60.0 at wild type siblings. WT<sup>1-3</sup>, mean of signal intensities for array 1-3 of wild type siblings. *spl*<sup>1-3</sup>, mean of signal intensities for array 1-3 of *spl* mutants. WT<sup>d1-d3</sup>, mean of signal intensities for array 1-3 of emasculated wild type siblings. *spl*<sup>1-3, d1-d2</sup>, mean of signal intensities for array 1-3 of not emasculated *spl* and array 1 and 2 of emasculated *spl*. <sup>a</sup>Affymetrix probe set number. <sup>b</sup>Arabidopsis genome initiative number. <sup>c</sup>Fold change for signal intensity of wild type/signal intensity of *spl*. <sup>d</sup>P values calculated by student's t-test for two-sample equal variance. <sup>e</sup>Expressed ovule stage. <sup>f</sup>Female gametophyte. <sup>g</sup>Male gametophyte. 0, It means that the detection call values were not 'present' in all replicates provided or not detect in transcriptome of sporophytic tissue. A, Genes identified from Ds insertional mutants (Pagnussat et al., 2005). B, ESTs of maize embryo sac provided from McCormick's web site. C, Carpel-specific transcriptome (Wellmer et al., 2004). D, Male gametophyte-specific transcriptome (Honys and Twell, 2004). E, Stamen-specific transcriptome (Wellmer et al., 2004).

**Table SV.** The primer sequences used in the promoter::GUS fusion

| Gene ID          | Primer Name | Primer Sequence (5' to 3')    | Mer | TM   | RE            | Amplicon Size | Total Promoter Size |
|------------------|-------------|-------------------------------|-----|------|---------------|---------------|---------------------|
| <i>At1g26795</i> | At1g26795 F | ttgaattctctttcagtgccactaaa    | 26  | 62.4 | <i>Eco</i> RI | 1069 bp       | 1106 bp             |
|                  | At1g26795 R | AAGCCATgggtgtgtttacttttaaga   | 28  | 64.8 | <i>Nco</i> I  |               |                     |
| <i>At1g36340</i> | At1g36340 F | ccgaattctgatcattaagttaggggt   | 28  | 65.3 | <i>Eco</i> RI | 1287 bp       | 1501 bp             |
|                  | At1g36340 R | TAACCATggttacgagaaatcaccaaac  | 28  | 65.9 | <i>Nco</i> I  |               |                     |
| <i>At2g20070</i> | At2g20070 F | gactcgaatgaacaattattgcttaa    | 28  | 60.2 | <i>Eco</i> RI | 457 bp        | 556 bp              |
|                  | At2g20070 R | aaaccatggaacactactacittatata  | 28  | 58.8 | <i>Nco</i> I  |               |                     |
| <i>At4g22050</i> | At4g22050 F | ttctcgaatgaaatcgtacctcttcactt | 28  | 64.7 | <i>Eco</i> RI | 1359 bp       | 2772 bp             |
|                  | At4g22050 R | TATCCATggttgagatgtgaggctcagt  | 28  | 68.9 | <i>Nco</i> I  |               |                     |
| <i>At4g30590</i> | At4g30590 F | ttgaattcagcatgattaaacttgaat   | 28  | 62.2 | <i>Eco</i> RI | 1290 bp       | 1431 bp             |
|                  | At4g30590 R | atgccatggtgatgtggttttatatag   | 28  | 64.8 | <i>Nco</i> I  |               |                     |
| <i>At5g40260</i> | At5g40260 F | gtgaattcgaccacaataagtgaatgc   | 28  | 64.7 | <i>Eco</i> RI | 1550 bp       | 2655 bp             |
|                  | At5g40260 R | AACCATggtaaaatcgccgtttacaaa   | 27  | 67.7 | <i>Nco</i> I  |               |                     |

All genes have no *Nor* I and *Sac* I site.
